# Supplementary material
Source: PubMed Central journal article supplement (PMC4070318)
Supplement: NIHMS583352-supplement-Supplement.pdf [file NIHMS583352-supplement-Supplement.pdf]

## **Materials and Methods**

### Cell culture

HEK 293FT (Invitrogen) cells were maintained in DMEM medium supplemented with 10% fetal bovine serum, 100 U/ml penicillin, and 100 µg/ml streptomycin. U937, MM1S, KMS34, KMS11, L363, RPMI8226 and OCImy5 cells were cultured in RPMI medium containing 10% fetal bovine serum, 100 U/ml penicillin, and 100 µg/ml streptomycin. Stable cell lines were established by lentiviral infection followed by fluorescence activated cell sorting or growth in media containing 0.5 or 2 µg/ml puromycin, 10 µg/ml blasticidin, or 200 µg/ml hygromycin.

### Luciferase ORF Fusion Library Construction

The destination vector pCMV-IRES-Renilla Luciferase-IRES-Gateway-Firefly Luciferase (pIRIGF) was constructed by overlapping PCR. The human ORFeome library V5.1 was shuttled into pIRIGF via LR gateway recombination (Invitrogen). After recombination overnight at 25 °C, 1 µL of reaction mix was transformed into 10 µL of OmniMAX 2T1 competent cells (Invitrogen) in 96-well plate through heat shock at 42 °C for 1 minute. 100 µL of SOC media were added into each well and the transformation mixtures were incubated at 37 °C for 1 hour. Next, each mixture was transferred into 1mL 2x YT media containing 100 µg/mL ampicillin using 96-well deep well plates (Qiagen). After shaking overnight at 37 °C, transformants were collected by centrifugation and plasmids were extracted using the DirectPrep 96 BioRobot Kit (Qiagen).

### 384-well Dual-glo luciferase screen

To transfect the ORF luciferase fusion library into 293FT cells seeded in 384-well plates, 25 µl of media containing 7000 cells was plated about 10 minutes prior to adding the DNA/transfection mixture. Using a Beckman FX pod head of 96-disposable tips, individual DNA plasmid solutions (5 µl) arrayed according to the original ORFeome V5.1 map (169 library plates) were diluted into 20 µl of Opti-MEM reduced serum media. 20 µl of diluted plasmid was then mixed with 20 µl of diluted Lipofectamine 2000 (Invitrogen) [1:15, diluted in Opti-MEM reduced serum media]. After 5 minutes at room temperature, 3 µl of this DNA/lipofectamine solution was added into 4 well quadrants of two identical 384-well plates (total of 8 wells) corresponding to the single 96-well source solution. The cells were then grown for 26-28 hours under standard growth conditions. An 8-channel multi-drop dispenser was used to add 5 µl of a 13.3 µM solution of lenalidomide (final 2 µM; Selleck Chemicals #S1029) to one plate and 0.13% DMSO to the other plate and the cells were allowed to grow for an additional 17- 20 hours. Expression of firefly and renilla luciferase were quantified using the Dual-glo assay according to manufacturer's instructions (Promega #E2940). For data analysis, the raw counts per second (CPS) were first normalized for total transfection efficiency by dividing the firefly CPS by renilla CPS (Fluc/Rluc) from each well. Then the four replicate well ratios on each plate were averaged and the standard deviation was determined. The lenalidomide (LEN) induced changes were then determined for each ORF by dividing the averaged Fluc/Rluc ratio from the LEN plate by the DMSO control plate (change of Fluc/Rluc). Data associated with all significant changes in ratio were confirmed to originate from raw data significantly above background signal. Any

quadruplicate data that had >50% standard deviation was eliminated from further analysis in order to quickly remove most of the data from low expression plasmids and otherwise error prone data. Most of the excluded data were from low expressing clones. The remaining data (13,372 out of 15,483 ORF's) were then fit to a log normal distribution with mean LEN/DMSO ratio of  $1.02 \pm 0.18$ , and a list of ORF whose ratio was increased (61) or decreased (46) by 3 standard deviations was generated for follow-up testing.

#### 96-well Dual-glo luciferase assay

To verify the change of Fluc/Rluc of ORFs obtained from the 384-well high-throughput screen, each clone was further tested in a 96 well format. The day before transfection, 293FT cells were seeded into solid opaque 96-well plates (BD biosciences) with 20,000 cells in 100  $\mu$ l of DMEM culture media per well. On the day of transfection 96-well polypropylene plates (Greiner) were used to prepare the transfection mixture. First, a plasmid mixture containing 240 ng of ORF luciferase fusion clone and 480 ng of pcDNA3 was diluted into 120  $\mu$ l of Opti-MEM reduced serum. Next 14.4  $\mu$ L of Lipofectamine 2000 was diluted into 120  $\mu$ l of Opti-MEM reduced serum. 5 minutes later, the plasmid solution was mixed with the diluted Lipofectamine 2000 using a multi-channel pipette. After 30 minutes, 28  $\mu$ l of DNA/lipofectamine mixture was added to each well of the 96 well plates seeded with 293FT cells (8 wells for each ORF). 24 hours after transfection, cells were treated with LEN (2  $\mu$ M) or DMSO in quadruplicate. 36 hours after transfection, the firefly and renilla luciferase signals were quantified using the Dual-glo assay according to manufacturer's instructions. The ratio of FLuc/Rluc was calculated for each well. To determine the change of Fluc/Rluc for each ORF, the averaged Fluc/Rluc of LEN treated wells was divided by that of DMSO treated wells. A 2-tailed Student's t test was performed to determine the statistical significance. P value < 0.05 was considered significant.

#### Plasmids

Human IKZF4 cDNA clone was PCR amplified from ETS clone HsCD00295530 (PlasmID, DF/HCC DNA Resource Core), and then cloned into pDONR223 via BP gateway recombination. Human CRBN, human IKZF1 splicing variant 2 (IKZF1-V2), human IKZF2 splicing variant 2 (IKZF2-V2), human IKZF5 and human IRF4 in pDONR223 entry vectors were obtained from the human ORFeome Collection (DF/HCC DNA Resource Core). IKZF1 splicing variant 1 (IKZF1-V1) cDNA and human IKZF2 splicing variant 1 (IKZF2-V1) cDNA were generated by overlapping PCR and cloned into pDONR223 via BP gateway recombination. IKZF4, IKZF1-V1 and IKZF2-V1 were cloned into pIRIGF via LR gateway recombination. IKZF1/2 chimeras (IKZF12 H1, IKZF12 H2, IKZF12 H3, IKZF12 H4, IKZF21 H5, IKZF21 H6, IKZF21 H7, IKZF2 H8, IKZF121 and IKZF212), IKZF1-V2-Q146H, IKZF1-V2- H176P/L177F, IKZF2-V1-H141Q, IKZF2-V1-P171H/F172L, IKZF1-V1-Q146H, IKZF3-Q147H mutants were generated via overlapping PCR and cloned into pIRIGF via LR gateway recombination. IKZF1-V2, IKZF2-V2, IKZF3, IKZF4, IKZF5 and IRF4 were cloned into plenti-UBC-gate-3xHA-pGK-PUR via LR gateway recombination. IKZF1-V2, IKZF121, IKZF1-V2-Q146H, IKZF1-V2- H176P/L177F, IKZF2-V1-H141Q, IKZF2-V1-P171H/F172L, IKZF212, IKZF1-V1, IKZF1-V1-Q146H, IKZF3 and IKZF3-Q147H were cloned into plenti-UBC-gate-3xHA-pGK-HYG. IKZF1-V2 and IKZF2-V2 were cloned into pcDNA3.2-DEST (Invitrogen) and plenti-UBC-gate-FLAG-pGK-HYG via LR gateway

recombination. IKZF1-V1, IKZF1-V1-Q146H, IKZF3, IKZF3-Q147H, IKZF2-V2 and IRF4 were cloned into plenti-CAG-gate-FLAG-IRES-GFP via LR recombination. CRBN-Y383A/W385A (YWAA) mutant was generated by overlapping PCR and cloned into pDON223 via BP recombination. CRBN and YWAA were cloned into pcDNA3-FLAG-gate-pGK-HYG, plenti-UBC-FLAG-gate-pGK-HYG, plenti-UBC-HA-gate-pGK-HYG, and plenti-UBC-Myc-gate-pGK-HYG via LR recombination. The cDNAs within the lentiviral expression vectors were confirmed by DNA sequencing.

### CRISPR genome editing

The CRBN gene editing vectors were generated by cloning the annealed oligonucleotide pair into pX330 digested with BbsI (16) (CRBN T1 Forward 5'-CACCGTCCTGCTGATCTCCTTCGC-3', CRBN T1 Reverse 5'-AAACGCGAAGGAGATCAGCAGGAC-3'; CRBN T2 Forward 5'-CACCGAAACAGACATGGCCGGCGA-3', CRBN T2 Reverse 5'-AAACTCGCCGGCCATGTCTGTTTC-3'). 293FT cells seeded in a 12-well plate were transiently transfected with 1µg of CRBN pX330 editing vector using Lipofectamine 2000. Three days after transfection, cells were trypsinized, placed in fresh growth media, and seeded into 96 well plates via serial dilution to obtain single clones. Two weeks later, single clones were picked and expanded to verify the editing of CRBN by immunoblot analysis. To target MM1S cells, the CRBN pX330 editing vector was shuttled into a lentiviral backbone containing a pGK-Pur cassette. MM1S cells were then infected with plenti-CRBN CRISPR pGK-pur and selected with 0.5 µg/mL puromycin for three days. Stable cells were plated in 96 well plates via limiting dilution. Four weeks later, single clones were expanded and *CRBN*<sup>-/-</sup> clones were identified by immunoblot analysis.

### Immunoblotting

Cells were washed twice with ice cold PBS and harvested in Buffer A [50 mM Tris (pH 7.4), 150 mM NaCl, 1% Triton X-100, 1 mM EDTA, 1 mM EGTA, 1 mM β-glycerophosphate, 2.5 mM sodium pyrophosphate, 1 mM Na<sub>3</sub>VO<sub>4</sub>, 10 mM NaF, and 1x protease inhibitor (Roche)]. Whole cell extracts were resolved by SDS-polyacrylamide gel electrophoresis, transferred onto a nitrocellulose membrane, and probed with the indicated primary antibodies. Bound antibodies were detected with horseradish peroxidase-conjugated secondary antibodies (Pierce) and enhanced chemiluminescence (ECL) western blotting detection reagents (Pierce) or Immobilon western chemiluminescent horseradish peroxidase substrate (Millipore).

### Antibodies

The following antibodies were used: HRP conjugated anti-FLAG M2 mouse monoclonal antibody (Sigma), HRP conjugated anti-HA mouse monoclonal antibody (Cell signaling), HRP conjugated anti-Myc mouse monoclonal antibody (Cell Signaling), FLAG M2 mouse monoclonal antibody (Sigma), CRBN rabbit polyclonal antibody (Novus Biologicals), IKZF1 rabbit polyclonal antibody (Cell Signaling, for immunoblot), IKZF1 rabbit polyclonal antibody (Bethyl, for chromatin immunoprecipitation), IKZF2 rabbit polyclonal antibody (Bethyl), IKZF3 rabbit polyclonal antibody (Imginex), HA.11 mouse monoclonal antibody (Covance), Vinculin mouse monoclonal antibody (Sigma), DDB1 rabbit polyclonal antibody (Cell Signaling), IRF4 rabbit polyclonal antibody (Cell Signaling), Cul4A rabbit polyclonal antibody (Cell Signaling), Goat anti-rabbit HRP

conjugated antibody (Thermo Scientific), Goat anti-mouse HRP conjugated antibody (Thermo Scientific).

### Immunoprecipitation

Cells were lysed in Buffer B [50 mM Tris (pH 7.4), 150 mM NaCl, 0.5% NP-40, 1 mM  $\beta$ -glycerophosphate, 2.5 mM sodium pyrophosphate 1 mM Na<sub>3</sub>VO<sub>4</sub>, 10 mM NaF, and 1x protease inhibitor (Roche)]. The lysates were clarified by centrifugation and then mixed with primary antibody for 12 hours at 4 °C. Where indicated, LEN (2  $\mu$ M) or DMSO were used to treat the cells prior to cell lysis (Pre), or added into whole cell extracts after cell lysis (Post). Immune complexes were captured with protein G agarose beads (Roche) for 1 hour at 4 °C and then washed 6 times with Buffer B. For anti-FLAG immunoprecipitation, cell extracts were pre-cleared with protein G agarose beads at 4 °C for 1 hour and then incubated with anti-FLAG M2 agarose beads at 4 °C for 6 hours, followed by six washes with Buffer B. Bound proteins were eluted by boiling in SDS loading buffer and detected by immunoblot analysis.

### Postlysis Binding Assays (Mixing Experiments)

293FT *CRBN*<sup>-/-</sup> T11 (CRIPSR T1 clone 1) cells infected with lentiviral vectors expressing FLAG-tagged IKZF1 or FLAG-tagged IKZF2, or empty lentiviral vectors were treated with DMSO or LEN (2  $\mu$ M) for 12 hour. Cells were then washed with ice-cold PBS twice and lysed in Buffer B. Total cell extract was collected after centrifugation and incubated with anti-FLAG M2 agarose beads at 4 °C overnight. Next, the beads were washed with Buffer B four times. The IKZF1 or IKZF2 loaded beads were then mixed with whole cell lysates prepared from 293FT *CRBN*<sup>+/+</sup> cells treated with DMSO or LEN (2  $\mu$ M) for 12 hour prior to cell lysis (Pre). After binding overnight at 4 °C, the agarose was washed six times with Buffer B. Bound proteins were then eluted by boiling in SDS loading buffer, resolved by SDS-PAGE, and detected by immunoblot analysis. The binding of FLAG-tagged IKZF1 with endogenous cereblon was also assayed using 293FT cell extracts that were treated with LEN (2  $\mu$ M) or DMSO post cell lysis (Post).

To assay binding of FLAG-tagged IKZF1 to exogenous cereblon, the IKZF1 loaded anti-FLAG M2 agarose beads were washed four times with Buffer B and then mixed with whole cell extracts prepared from 293FT *CRBN* null T11 cells (transiently transfected with HA-tagged cereblon (*CRBN*) or cereblon mutant (YWAA) and treated with DMSO or LEN (2  $\mu$ M) for 12 hour before lysis). After binding overnight at 4 °C, the agarose was washed six times with Buffer B. Bound proteins were then eluted by boiling in SDS loading buffer, resolved by SDS-PAGE, and detected by immunoblot analysis.

To assay binding of recombinant cereblon with endogenous IKZF1 and IKZF3, FLAG-tagged *CRBN* or YWAA mutant transiently expressed in 293FT *CRBN*<sup>-/-</sup> T11 cells was immunoprecipitated using anti-FLAG M2 agarose beads. The cereblon loading beads were washed four times with Buffer B and then mixed with MM1S *CRBN*<sup>-/-</sup> T11 cell extracts that were treated with LEN (10  $\mu$ M) or DMSO after cell lysis. After binding overnight at 4 °C, the agarose was washed six times with Buffer B. Bound proteins were then eluted by boiling in SDS loading buffer, resolved by SDS-PAGE, and detected by immunoblot analysis.

### In vitro Binding and Ubiquitylation Assay

293FT CRBN null T11 cells were transiently transfected with plasmids encoding Myc-tagged cereblon (CRBN) or cereblon mutant (YWAA), HA-tagged IKZF1, or with empty vector (EV). 48 hours later, the cells were washed twice with ice cold PBS and lysed in Buffer B. Myc-CRBN or Myc-YWAA cell extracts were mixed with HA-IKZF1 extract in the absence or presence of LEN (2  $\mu$ M) or DMSO. Anti-Myc antibody conjugated agarose beads (Sigma) were then added to mixed extracts, following by incubation at 4 °C for 12 hours. As a negative control, 5% of the HA-IKZF1 extract used to mix with CRBN extract was mixed with extracts from the empty vector cells and then incubated with anti-HA antibody conjugated beads (Sigma). Next, the beads were washed four times with buffer B, twice with 1xURB buffer [50 mM Tris (pH 7.4), 5 mM KCl, 5 mM NaF, 5 mM MgCl<sub>2</sub>, 0.5 mM DTT], and then resuspended in 20  $\mu$ L of 1 x URB buffer containing 200 ng recombinant E1 (Boston Biochem), 250 ng recombinant UbcH5a (Boston Biochem), 250 ng recombinant UbcH5b (Boston Biochem), 0.4  $\mu$ M Ubiquitin aldehyde (Boston Biochem), 10  $\mu$ g FLAG Ubiquitin (Boston Biochem), 1 x ERS (20 mM creatine phosphate, 0.2  $\mu$ g/ $\mu$ l creatine phosphokinase, 5 mM Mg-ATP), 1x Protease/phosphatase inhibitor (Roche), 10 nM LLNL (Boston Biochem), 10 nM MG132 (EMD Bioscience), 0.5 mM ATP. The reaction was carried out at 30 °C for 1 hour and then terminated by boiling in SDS loading buffer. Ubiquitylation products were resolved by SDS-PAGE and detected by immunoblot analysis.

### In vivo Ubiquitylation Assay

The ubiquitylation assays were carried out as described previously (30). In brief, 293FT cells seeded in 6 well plates were transiently transfected with the following plasmids as indicated in Figure 3C: pcDNA3-IKZF1-V2-V5 (1  $\mu$ g), pcDNA3-FLAG-CRBN (1  $\mu$ g), pcDNA3-FLAG-YWAA (1  $\mu$ g) and pCMV-8 x His-Ub (0.5  $\mu$ g). Empty vector pcDNA3 was used to bring the total plasmid DNA to 4  $\mu$ g for each transfection. Thirty-six hours later, cells were treated with LEN (2  $\mu$ M) or DMSO as well as 10  $\mu$ M MG132 for additional 12 hours. The cells were then washed twice with ice cold PBS, scraped off the plates in PBS and then collected by centrifugation. A small aliquot of the cells was lysed in Buffer A, and the rest were lysed in Buffer C (6M guanidine-HCL, 0.1M Na<sub>2</sub>HPO<sub>4</sub>/NaH<sub>2</sub>PO<sub>4</sub>, 10 mM imidazole, pH 8.0). After sonication, the whole cell extract were mixed with 25  $\mu$ L of Ni-NTA agarose beads at room temperature for 3 hours. Next, the Ni-NTA beads were washed twice with Buffer C, twice with Buffer D (1 Volume of Buffer C: 3 volumes of Buffer E), and once with Buffer E (25 mM Tris.CL, 20 mM imidazole, pH 6.8). Bound proteins were then eluted by boiling in 1x SDS loading buffer containing 300 mM imidazole, resolved by SDS polyacrylamide gel electrophoresis, and detected by immunoblot analysis.

### In vivo Protein Degradation Assay

293FT cells seeded in 12-well plates were transiently transfected with 50 ng of plenti-UBC-pGK-HYG or plenti-UBC-pGK-Pur lentiviral vectors expressing the indicated ORFs and 950 ng of the corresponding empty lentiviral vector. Thirty-six hours later, cells were treated with DMSO, LEN (2  $\mu$ M) or POM (0.2  $\mu$ M) for 12 hours. Cell extracts were harvested using Buffer A and subjected to immunoblot analysis.

### Protein Half Life Analysis

For cycloheximide assays, cells were pretreated with DMSO or LEN (2  $\mu$ M) for 1 hour, and then 100  $\mu$ g/ml cycloheximide (Sigma) was added into the DMEM growth medium. At various time points thereafter cell extracts were harvested using Buffer A and subjected to immunoblot analysis.

### Realtime RT-PCR

Total RNA was extracted using Qiagen RNeasy Mini Kit with on-column DNase digestion. Total RNA was reverse transcribed into first-strand cDNA using AffinityScript QPCR cDNA Synthesis Kit (Agilent) with random primers. Real-time PCR was performed in duplicate using RT2 SYBR Green / ROX qPCR Master Mix (Qiagen) and the Mx3000P QPCR system (Stratagene). Values were averaged to calculate the expression level and normalized against the level of RPS18. PCR primers are as follows:

RPS18 For, 5'-TTCGGAAGTGGGCCATGAT-3'  
RPS18 Rev, 5'-TTTCGCTCTGGTCCGTCTTG-3'  
IKZF1 For, 5'-CCCCTGTAAGCGATACTCCA-3'  
IKZF1 Rev, 5'-TGGGAGCCATTCATTTTCTC-3'  
IKZF3 For, 5'-TCGGAGATGGTTCCAGTTATCA-3'  
IKZF3 Rev, 5'-ATTCTGGCGTTCTTCATGGTT-3'  
IRF4 For, 5'-GCGGTGCGCTTTGAACAAG-3'  
IRF4 Rev, 5'-ACACTTTGTACGGGTCTGAGA-3'

### Lentiviral shRNA Vectors

Synthetic complementary oligonucleotides targeting the mRNA of interest were annealed and subcloned as follows: Oligonucleotides targeting CRBN or a control oligonucleotide pair (shCNTL) ligated into pLKO-tet-on-puro (31). Oligonucleotides targeting IKZF1 and IKZF3 and shCNTL were ligated into pLKO-RFP (a gift from Dr. Julie Losman). Targeting sequences are listed as follows:

shCNTL, 5'-CAACAAGATGAAGAGCACCAA-3';  
shCRBN-1, 5'-GCCACGAATAGTTGTCATTT-3';  
shCRBN-2, 5'-GCTTGCAACTTGAATCTGATA-3';  
shIKZF1-1, 5'-GCATTTGGAAACGGGAATAAA-3'  
shIKZF1-2, 5'-CTACGAGAAGGAGAACGAAAT-3'  
shIKZF1-3, 5'-CCGCTTCCACATGAGCTAAAG-3'  
shIKZF3-1, 5'-GCCTGAAATCCCTTACAGCTA-3'  
shIKZF3-2, 5'-GTAACCTCCTCCGCCACATTA-3'  
shIKZF3-3, 5'-GACAGTCTAAGAGTAAGTAAA-3'

### cDNA depletion or enrichment assay

MM1S cells were infected with plenti-CAG-FLAG-IRES-GFP empty vector or plenti-CAG-FLAG-IRES-GFP vectors expressing IKZF1-V1-Q146H, IKZF3-Q147H, IKZF2-V2 or IRF4. 48 hours after infection, 2  $\mu$ M LEN or DMSO were added to the culture media. The media was replaced with fresh media containing LEN or DMSO every other day. The percentage of GFP+ cells at the indicated time points thereafter was determined by flow cytometric analysis. The fold change in the percentage of GFP+ cells was calculated by dividing the percentage of LEN treated cells by that of DMSO treated cells.

### Small hairpin RNA (shRNA) depletion or enrichment assay

MM1S or KMS34 cells were infected with pLKO-RFP lentiviral vectors expressing control shRNA or shRNAs against IKZF1 or IKZF3. Two days later the percentage of RFP+ cells was monitored using flow cytometer. The change of RFP+ percentage for each shRNA was first normalized against day 2. Then, the relative percentage of RFP+ cells was normalized against shRNA control for each time point as indicated.

### Chromatin Immunoprecipitation

ChIP studies were carried out as described previously with several modifications using specific primers for the human IRF4 locus (32). Briefly, 4x10<sup>7</sup> MM1.S cells were treated 24 hours with 2  $\mu$ M LEN or DMSO and crosslinked for 10 minutes at room temperature by the addition of one-tenth of the volume of 11% formaldehyde solution (11% formaldehyde, 50mM HEPES pH 7.3, 100 mM NaCl, 1 mM EDTA pH 8.0, 0.5 mM EGTA pH8.0) to the growth media followed by quenching with 0.125M glycine and two washes with PBS. Fifty  $\mu$ l of Dynal protein 6 magnetic beads (Sigma) were blocked with 0.5% BSA (w/v) in PBS. Magnetic beads were bound with 10  $\mu$ g of the anti-IKZF1 antibody (Bethyl Labs #A303-516A). Crosslinked cells were lysed with lysis buffer 1 (50 mM HEPES-KOH pH 7.5, 140 mM NaCl, 1 mM EDTA pH 8.0, 10% glycerol, 0.5% NP-40, and 0.25% Triton X-100) and washed with lysis buffer 2 (10 mM Tris-HCl pH 8.0, 200 mM NaCl, 1 mM EDTA pH 8.0, and 0.5 mM EGTA pH 8.0). Cells were resuspended and sonicated in lysis buffer 3 (50 mM HEPES-KOH pH 7.5, 140 mM NaCl, 1 mM EDTA pH 8.0, 1 mM EGTA pH 8.0, 1% Triton X-100, 0.1% Na-Deoxycholate and 1% SDS) for 4X 10 minute cycles, 30 second on/off cycles using a Bioruptor sonicator on power setting HIGH. Sonicated lysates were cleared, diluted 1:10 with dilution buffer (50 mM HEPES-KOH pH 7.5, 140 mM NaCl, 1 mM EDTA pH 8.0, 1 mM EGTA pH 8.0, 1% Triton X-100, 0.1% Na-Deoxycholate) and incubated overnight at 4 °C with magnetic beads bound with antibody. Beads were washed two times with lysis buffer 3, once with high salt wash (50 mM HEPES-KOH pH 7.5, 500 mM NaCl, 1 mM EDTA pH 8.0, 1 mM EGTA pH 8.0, 1% Triton X-100, 0.1% Na-Deoxycholate and 0.1% SDS), once with LiCl wash buffer (20 mM Tris-HCl pH 8.0, 1 mM EDTA pH 8.0, 250 mM LiCl, 0.5% NP-40, 0.5% Na-deoxycholate), and once with TE buffer (10 mM Tris-HCl pH 8.0, 1 mM EDTA pH 8.0). Protease inhibitors (Roche Complete) were added to all lysis and wash buffers. Bound complexes were eluted twice in elution buffer (50 mM Tris-HCl pH 8.0, 10 mM EDTA pH 8.0, 1% SDS) at 65 °C for 15 min with occasional vortexing. Crosslinks were reversed overnight at 65 °C. RNA and protein were digested using RNase A and Proteinase K, respectively, and DNA was purified with phenol chloroform extraction and ethanol precipitation. Primers were designed to amplify 2 sites within the promoter region, and a negative control region 3' of the transcribed region: Promoter site 1 (forward) 5'-AGTTGCAGGTTGACCTACGG-3' and (reverse) 5'-AGCTTTCACCCGTTGAGCTT-3'; Promoter site 2 (forward) 5'-ACTCTCAGTTTCACCGCTCG-3' and (reverse) 5'-CTCCGGGTCCTCTCTGGTAT-3'; Negative control region 1 (forward) 5'-CGTGGCTATGTTTGCTTGGG-3' and (reverse) 5'-AGCAGGCCTCTTGTTGTTT-3'; Negative control region 2 (forward) 5'-GCAGTGCTGACACTGGATCT-3' and (reverse) 5'-GCCTGCCATGCGTAATCAAG-

3'. Enrichment data were analyzed by calculating the immunoprecipitated DNA percentage of input DNA for each sample.

#### Cell Proliferation Assay

1.5 x 10<sup>6</sup> viable myeloma cells were plated in 10-cm plates in RPMI1640 growth media containing LEN (2 μM) or DMSO vehicle control in triplicates. Every 2 days, cells were detached by gentle scraping and half of the total cells were replated in fresh RPMI growth media containing the respective agents (LEN or DMSO) for continuous culturing. At day 2, day 4 and day 8, cells were counted using a ViaCell cell viability counter (Beckman Coulter).



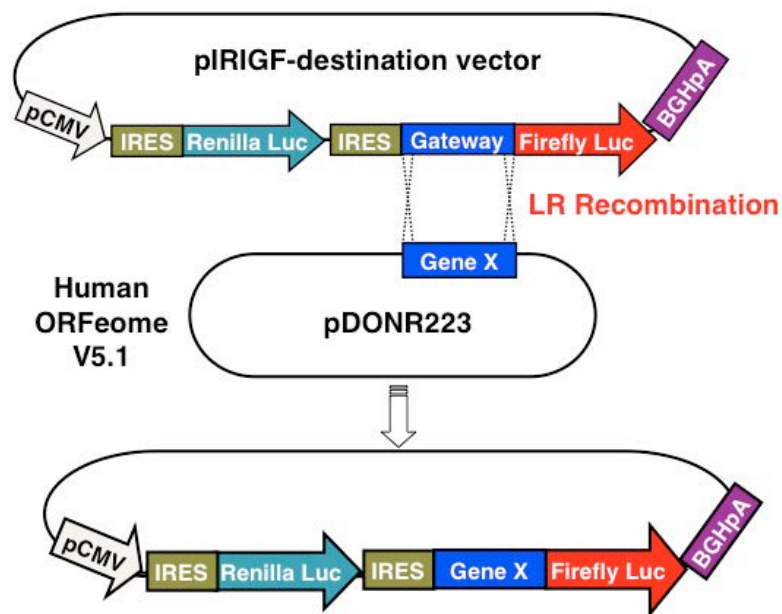

**Fig. S1. Firefly Luciferase Fusion Vector Schematic.** Schematic of plasmid vectors used to generate open reading frame (ORF)-firefly luciferase fusion library. Note that both renilla luciferase and ORF-firefly luciferase are encoded by a single mRNA and both are translated independently via internal ribosomal binding sites.

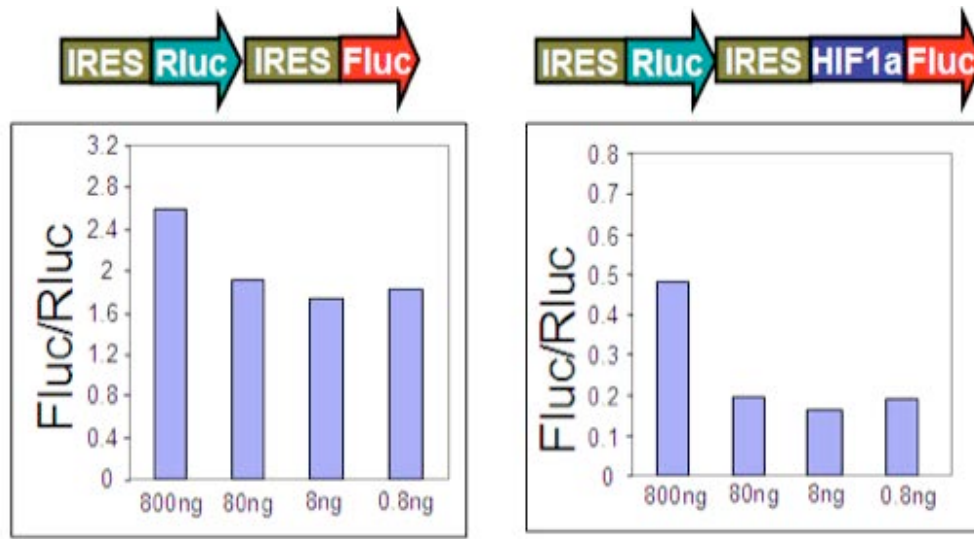

**Fig. S2. Firefly/Renilla Luciferase Ratios Are Stable Over a Range of Reporter Plasmid Concentrations.** 293FT cells were transiently transfected with the indicated amounts of plasmids encoding firefly luciferase (Fluc) alone (left) or a HIF1 $\alpha$ -Fluc fusion protein (right). Empty pBluescript-KS was added to bring the total plasmid DNA to 800 ng. Dual luciferase assays were performed 48 hours later and Fluc/Rluc was calculated.

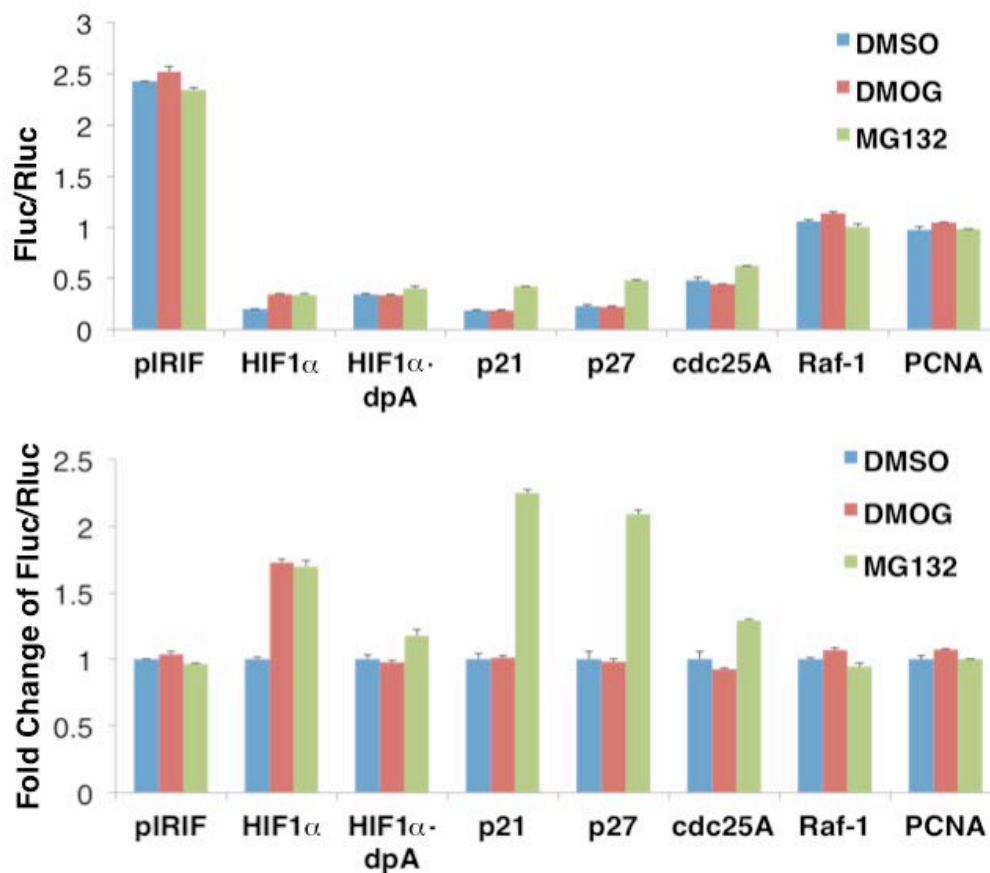

**Fig. S3. Pharmacological Stabilization of Firefly Luciferase Fusion Protein.** 293FT cells were transiently transfected with plasmids encoding unfused Fluc (pIRIF) or the indicated ORF-firefly luciferase (Fluc) fusions and then treated for 24 hours with DMOG (1  $\mu$ M), MG132 (10  $\mu$ M), or vehicle (DMSO). HIF1 $\alpha$ -dPA is a HIF1 $\alpha$  variant lacking both prolyl hydroxylation sites (33). Shown for each plasmid are Fluc/Rluc values (top) and Fold change in Fluc/Rluc compared to DMSO treatment (bottom). Data are mean  $\pm$  SD, n=4.

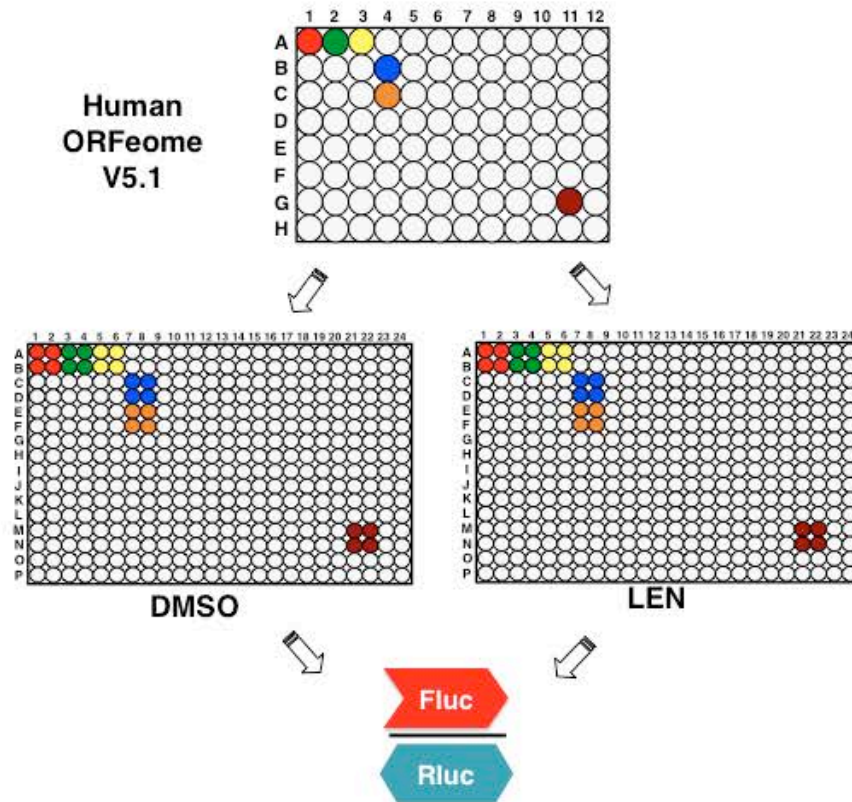

**Fig. S4. Plating Strategy for Primary Screen.** Schematic depicting plating strategy for primary screen.

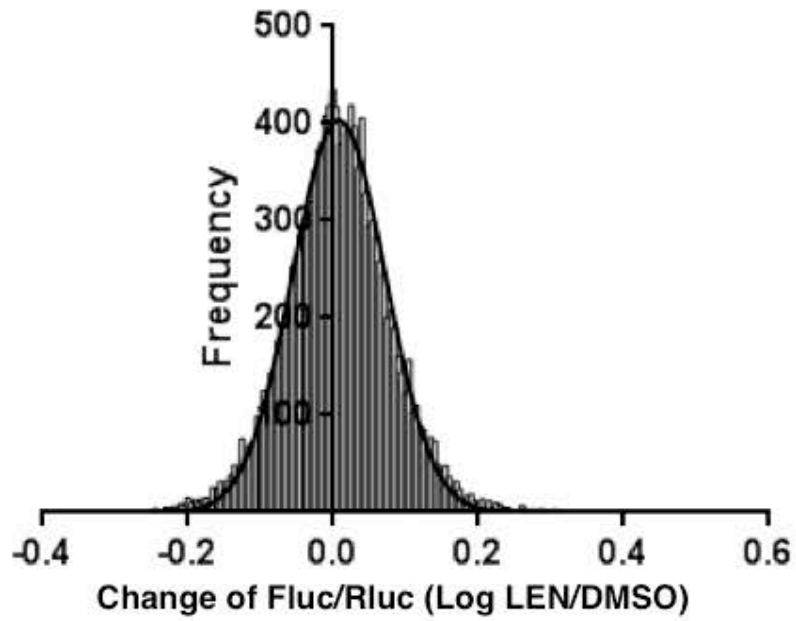

**Fig. S5. Normalized Data From Primary Screen of Lenalidomide-Induced Changes in Protein Stability.** Distribution of fold increase in firefly luciferase (Fluc)/ renilla luciferase (Rluc) values after treatment with lenalidomide (LEN). Data were normalized by converting fold induction to log<sub>10</sub>.

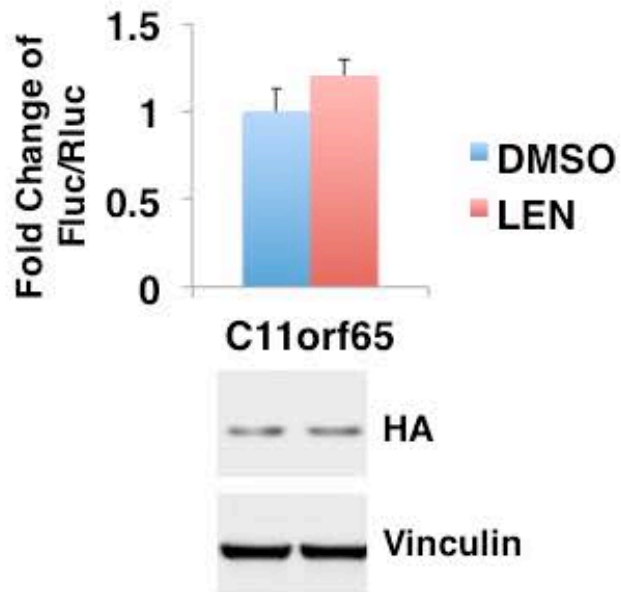

**Fig. S6. Retest of C11orf65-Luciferase.** Firefly luciferase (Fluc)/renilla luciferase (Rluc) ratios (top panel) and immunoblots (bottom panels) of 293 FT cells transfected to produce C11orf65 fused to firefly luciferase (top panel) or hemagglutinin (HA) epitope tag (bottom panels). Where indicated cells were treated with LEN (2  $\mu$ M) for 12 hours. Fluc/Rluc ratios were normalized to DMSO treated cells. Data are mean  $\pm$  SD, n=4.

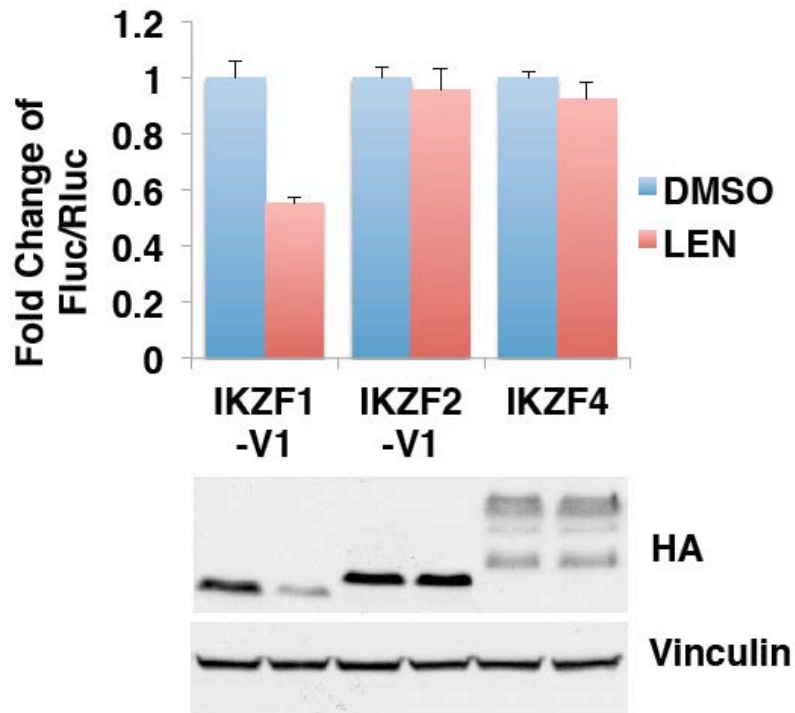

**Fig. S7. Downregulation of IKZF1 and IKZF2 Splicing Variants by lenalidomide.** Firefly luciferase (Fluc)/Renilla luciferase (Rluc) ratios (top panel) and immunoblots (bottom panels) of 293FT cells transfected to produce the indicated IKZF proteins fused to firefly luciferase (top panel) or hemagglutinin (HA) epitope tag (bottom panels). Where indicated cells were treated with LEN (2  $\mu$ M), MLN4924 (1  $\mu$ M), and MG132 (10  $\mu$ M) for 12 hours. Data are mean  $\pm$  SD, n=4.

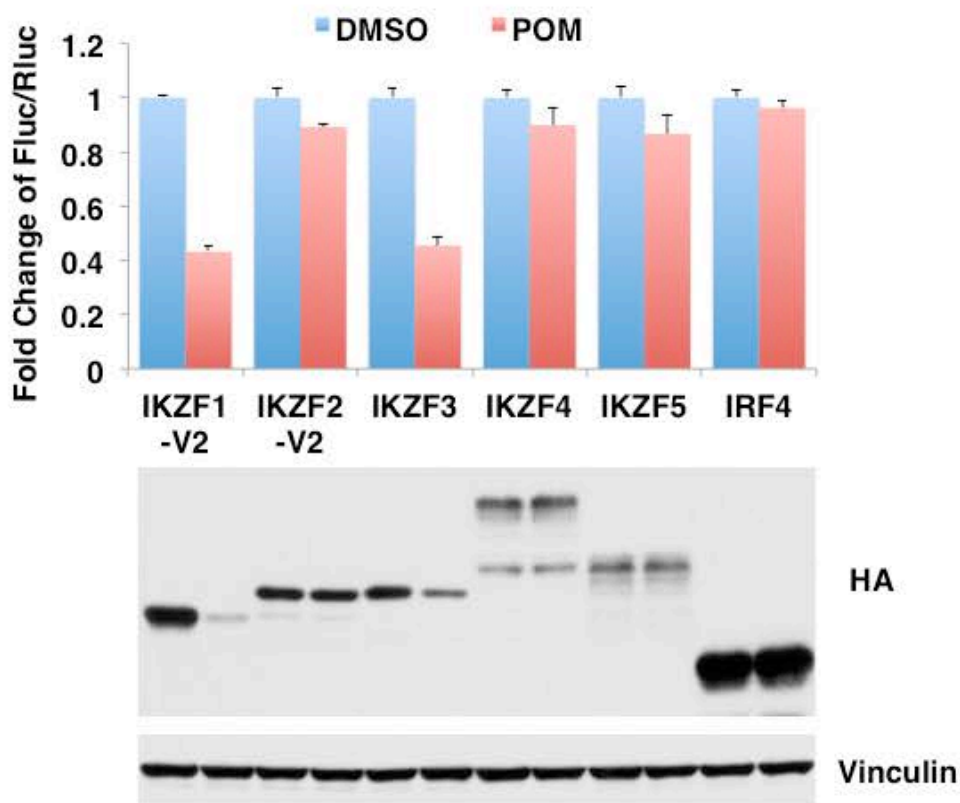

**Fig. S8. Downregulation of IKZF1 and IKZF3 by Pomalidomide.** Firefly luciferase (Fluc)/renilla luciferase (Rluc) ratios (top panel) and immunoblots (bottom panels) of 293 FT cells transfected to produce the indicated IKZF proteins fused to firefly luciferase (top panel) or hemagglutinin (HA) epitope tag (bottom panels). Where indicated cells were treated with pomalidomide (POM) (0.2  $\mu$ M) for 12 hours. Fluc/Rluc ratios were normalized to corresponding DMSO treated cells. Data are mean  $\pm$  SD, n=4.



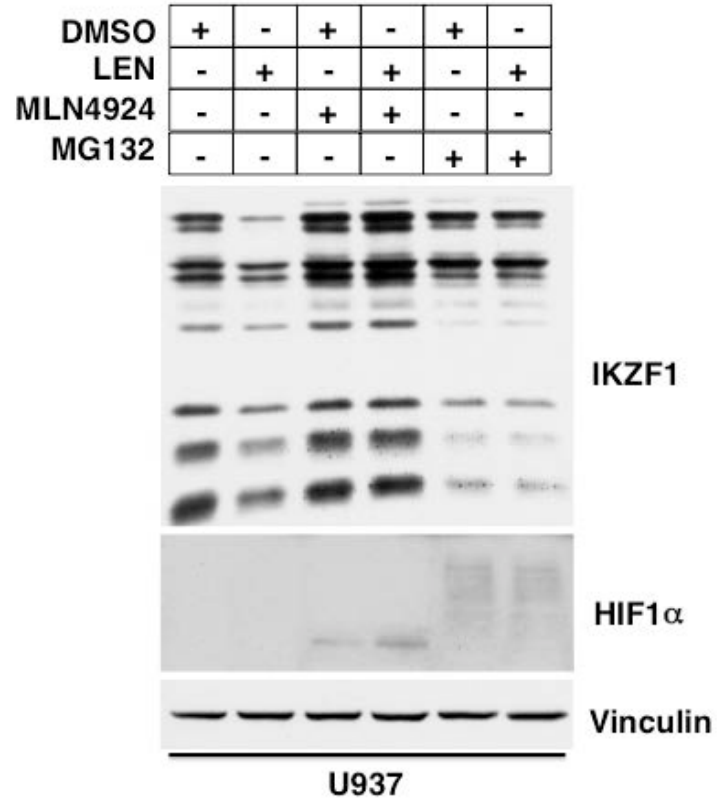

**Fig. S9. Downregulation of Endogenous IKZF1 by Lenalidomide in U937 Cells.** Immunoblot analysis of U937 cells treated with LEN (2  $\mu$ M), MLN4924 (1  $\mu$ M) and MG132 (10  $\mu$ M), where indicated, for 12 hours.

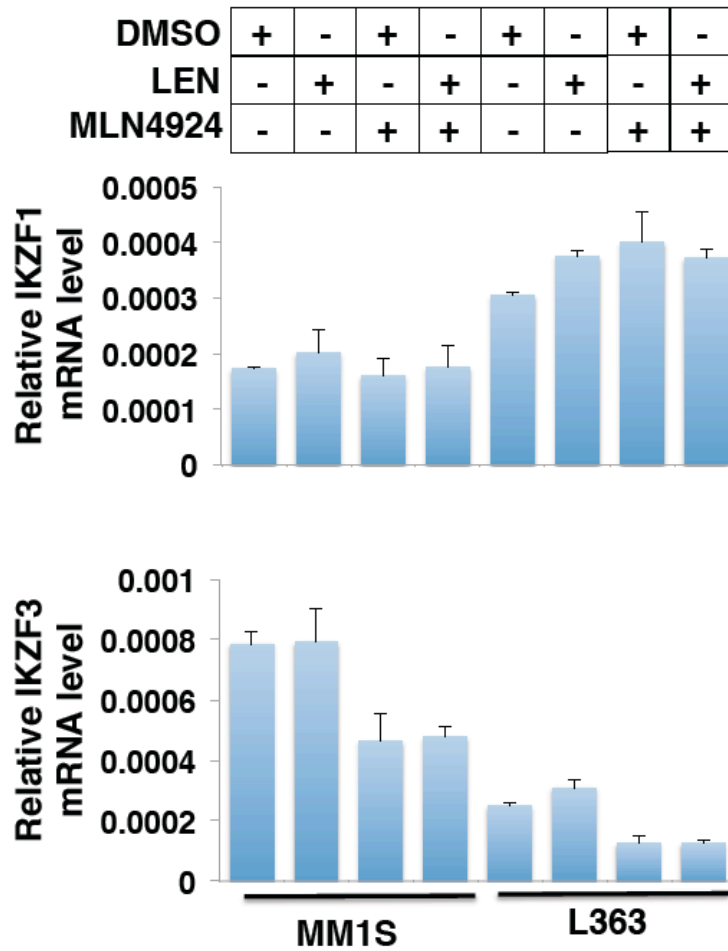

**Fig. S10. The mRNA Level of IKZF1 and IKZF3 Is Not Significantly Affected by Lenalidomide.** Real-time qPCR analysis of MM1S and L363 cells treated with LEN (2  $\mu$ M) and MLN4924 (1  $\mu$ M) as indicated for 12 hours. Data are mean  $\pm$  SD, n=3.

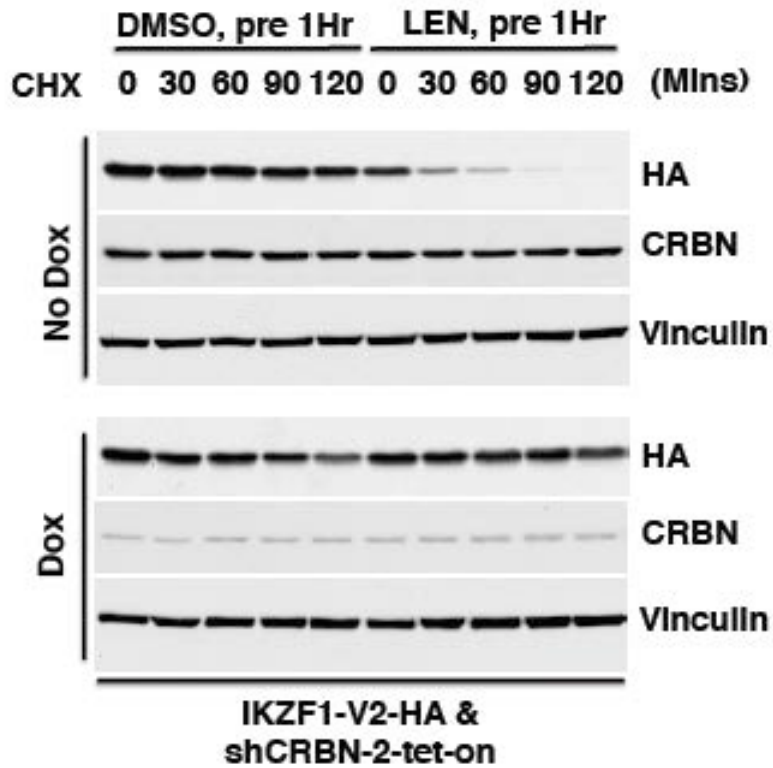

**Fig. S11. Lenalidomide-induced Degradation of IKZF1 Depends on Cereblon.** Immunoblot analysis of 293FT cells stably expressing IKZF1-V2-HA and doxycycline-inducible CRBN shRNA-2. Where indicated cells were pretreated with LEN (2  $\mu$ M) or DMSO for 1 hour before the addition of cycloheximide (CHX) for the indicated periods. Doxycycline (Dox) (1 $\mu$ g/mL) were added for 48 hours.

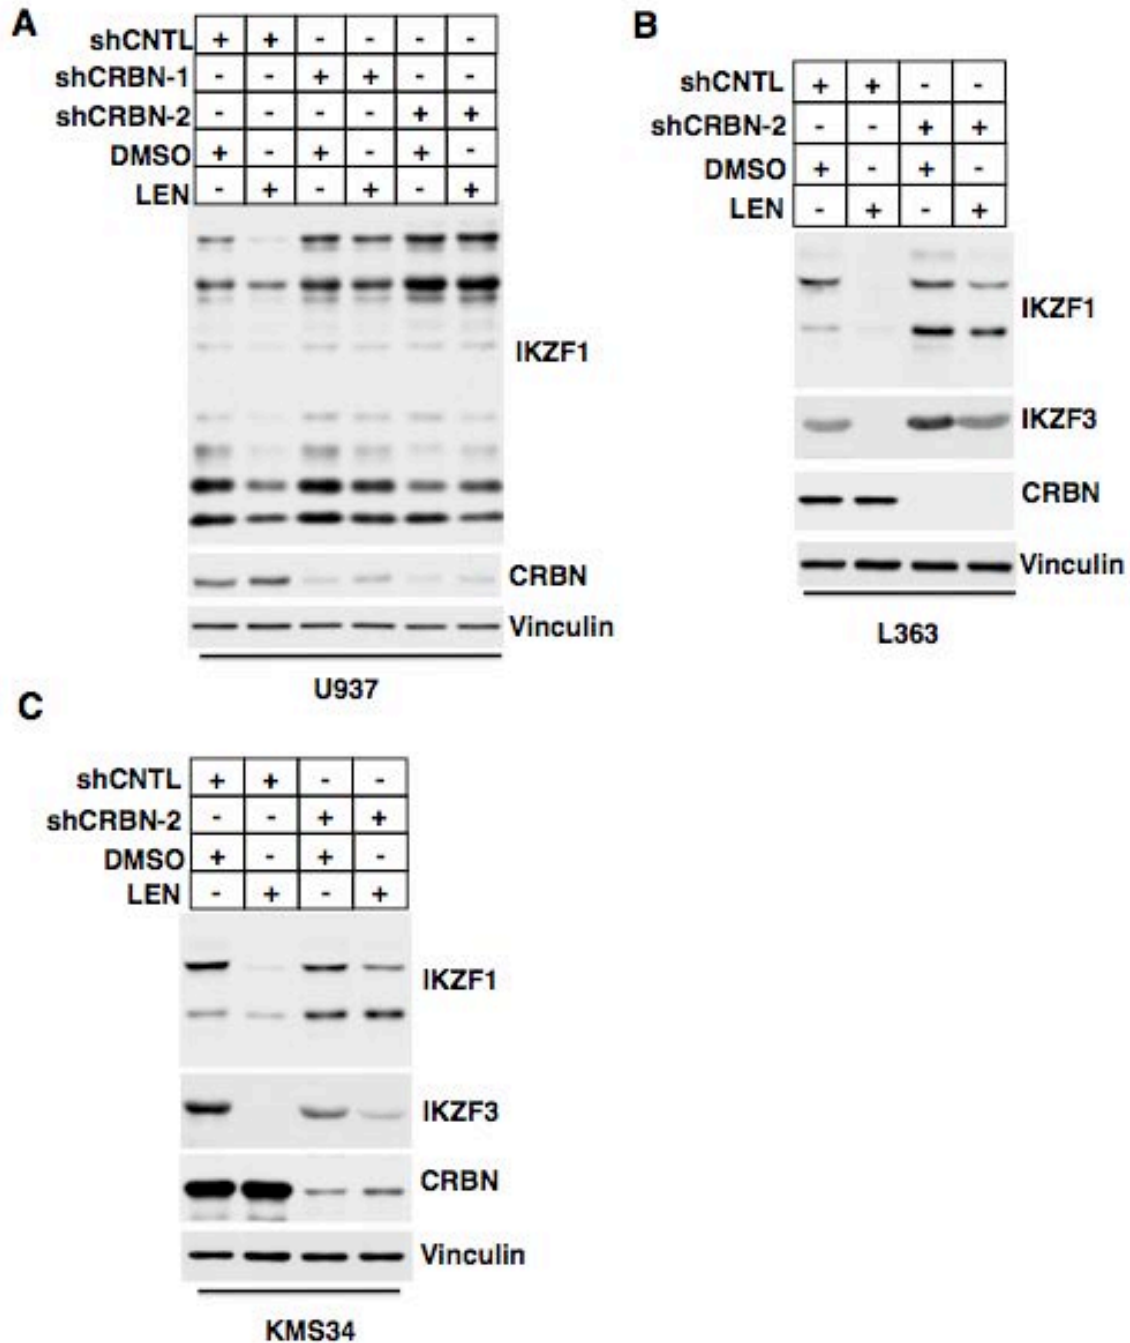

**Fig. S12. Downregulation of IKZF1 and IKZF3 by Lenalidomide Requires Cereblon.** Immunoblot analysis of U937 (A), L363 (B), and KMS34 (C) cells transiently infected with lentiviruses expressing indicated shRNAs against CRBN or control (CNTL) shRNA and treated, where indicated, with DMSO or LEN (2  $\mu$ M) for 12 hours.

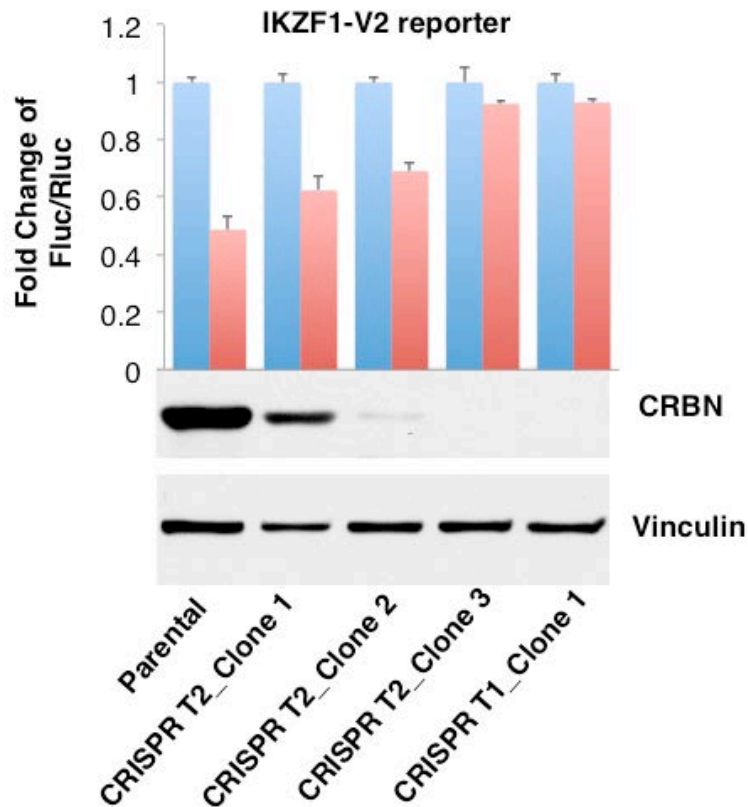

**Fig. S13. Analysis of Cereblon-Defective Clones Generated by CRISPR.** Firefly luciferase (Fluc)/renilla luciferase (Rluc) ratios (top panel) and immunoblots (bottom panels) of parental 293FT and subclones generated by CRISPR-based targeting of CRBN that were then transfected to produce IKZF1 fused to firefly luciferase (top panel) or hemagglutinin (HA) epitope tag (bottom panels). Where indicated cells were treated with lenalidomide (2  $\mu$ M) (red bars). Fluc/Rluc ratios were normalized to corresponding DMSO treated cells. Note that CRISPR T2\_Clone 1 and CRISPR T2\_Clone 2 express residual cereblon. Data are mean  $\pm$  SD, n=4.

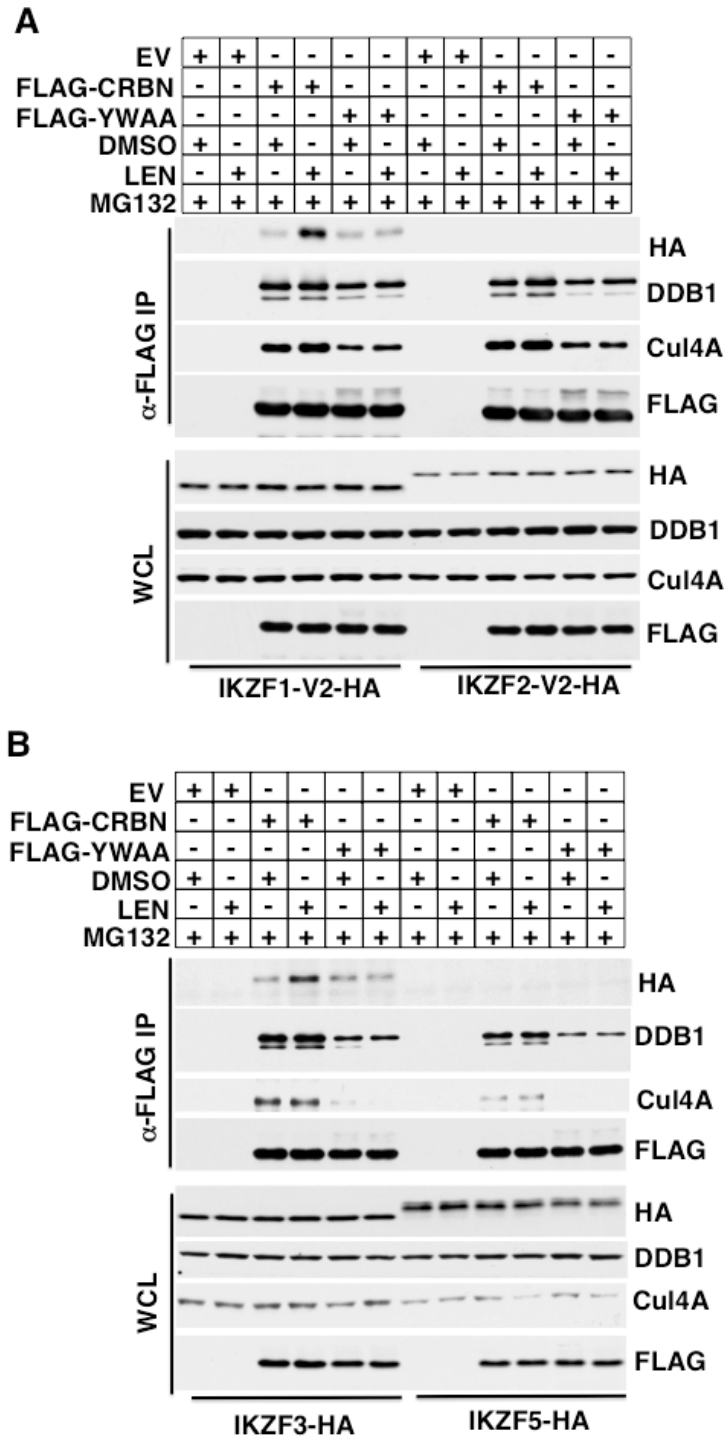

**Fig. S14. Enhanced binding of IKZF1 and IKZF3, but not IKZF2 and IKZF5, to Cereblon in the Presence of Lenalidomide.** (A and B) Immunoblot analysis of anti-FLAG immunoprecipitates from 293 FT cells stably expressing HA-tagged IKZF that were transiently transfected to produce FLAG-tagged wild type cereblon or YWAA mutant. The cells were treated with MG132 (10  $\mu$ M) and, where indicated, with LEN (2  $\mu$ M). WCL = whole cell lysate. EV, empty vector.

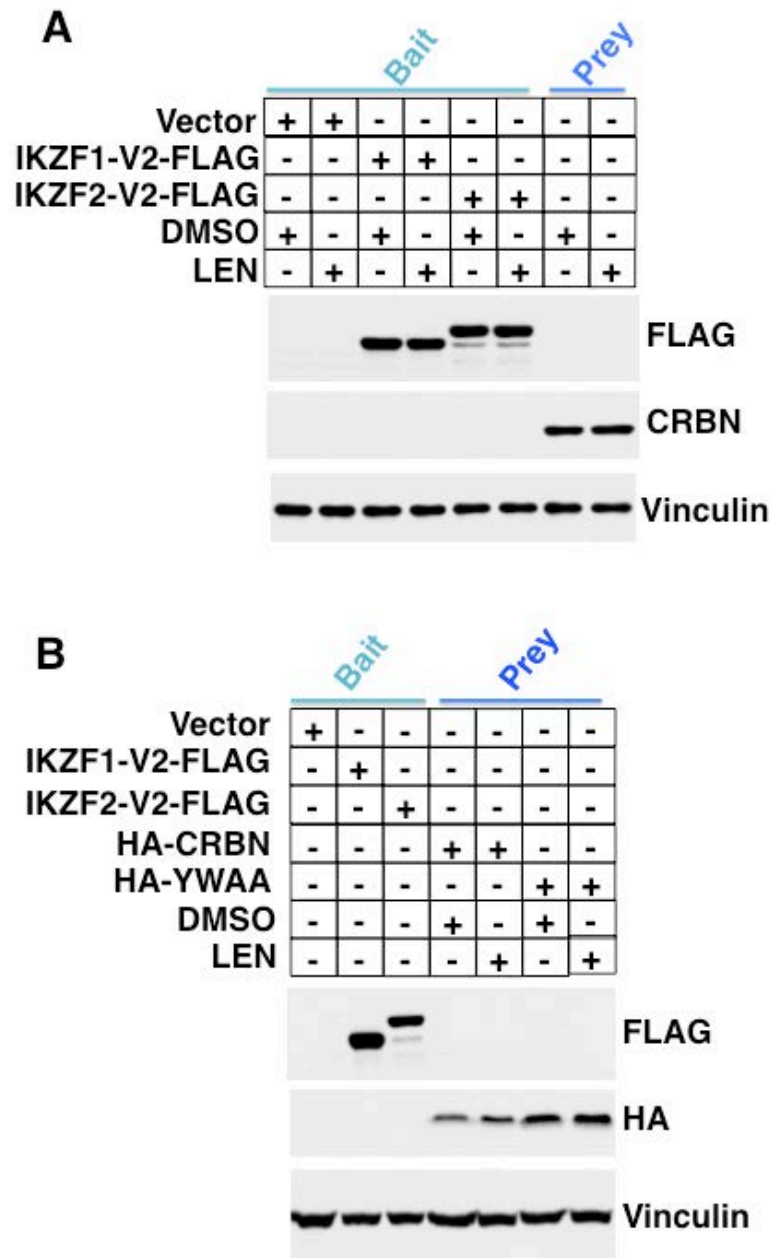

**Fig. S15. Input Protein Levels for Binding Studies Corresponding to Fig. 4A and 4B.** (A) Total Input for Figure 4A. Immunoblot analysis of 293FT parental cells (Prey) and 293FT CRISPR T1\_Clone 1 (*CRBN*<sup>-/-</sup> T11) cells transfected to produce the indicated FLAG-tagged IKZF (Bait). (B) Total Input for Figure 4B. Immunoblot analysis of 293FT *CRBN*<sup>-/-</sup> T11 cells transfected to produce the indicated FLAG- and HA-tagged proteins. Where indicated cells were treated with LEN (2  $\mu$ M) for 12 hours prior to cell lysis.

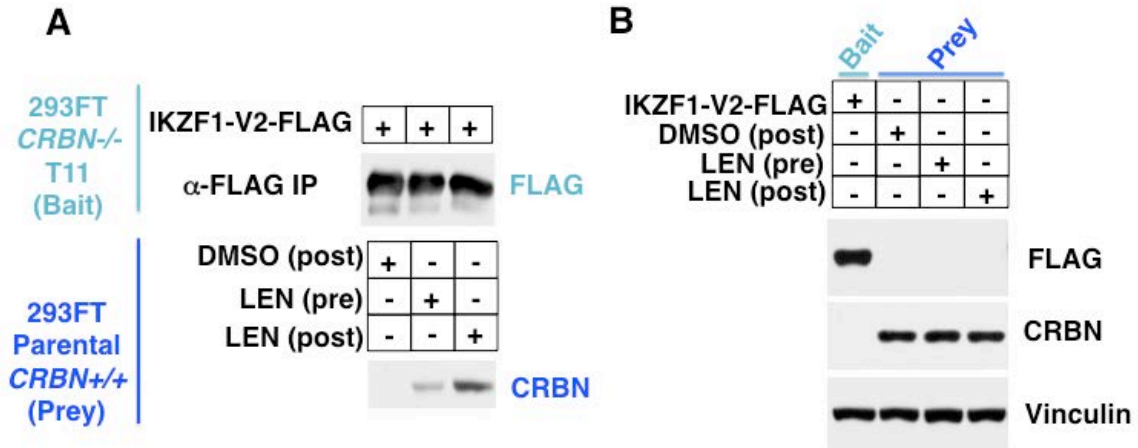

**Fig. S16. Lenalidomide Promotes the Binding of IKZF1 to Cereblon In Vitro.** (A) FLAG-IKZF1 recombinant protein stably produced in *CRBN*<sup>-/-</sup> T11 293FT cells was captured onto anti-FLAG agarose beads and used as bait to capture endogenous cereblon (Prey) from *CRBN*<sup>+/+</sup> 293FT parental cells that were treated with LEN (2 μM) or DMSO for 12 hours before (pre) or after (post) cell lysis. Bound proteins were detected by immunoblot analysis. (B) Input protein for panel A.



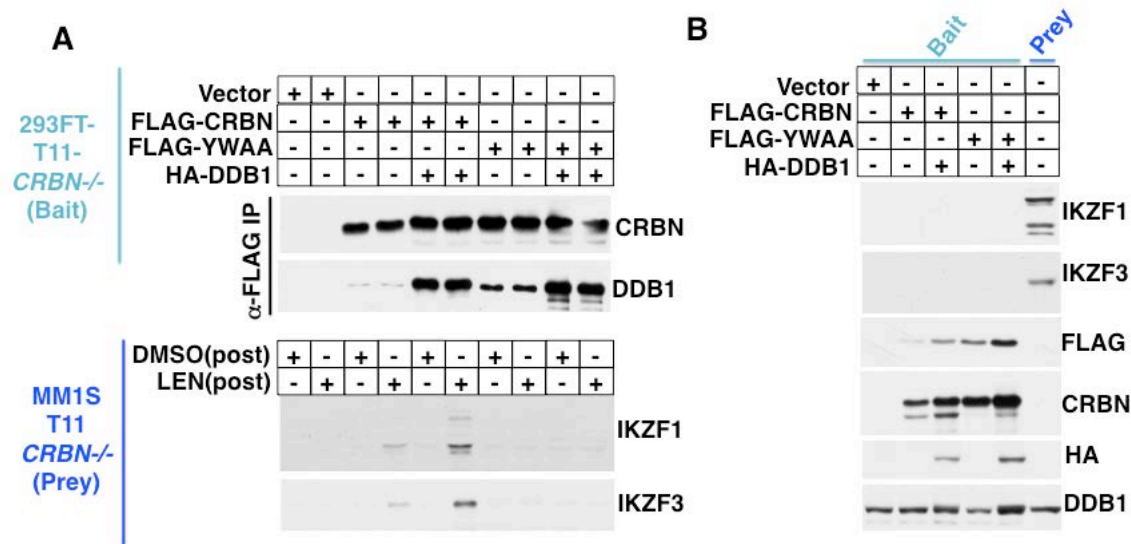

**Fig. S17. Lenalidomide Promotes the Binding of IKZF1 and IKZF3 to Cereblon In Vitro.** (A) FLAG- CRBN, FLAG-YWAA and HA-DDB1 produced in 293FT *CRBN*<sup>-/-</sup> T11 cells by transient transfection were captured onto anti-FLAG agarose and used as bait to capture endogenous IKZF1 and IKZF3 from MM1S *CRBN*<sup>-/-</sup> T11 whole cell extracts (Prey) that were treated with LEN (10 μM) or DMSO after (post) cell lysis. Bound proteins were detected by immunoblot analysis. (B) Input protein for panel A.

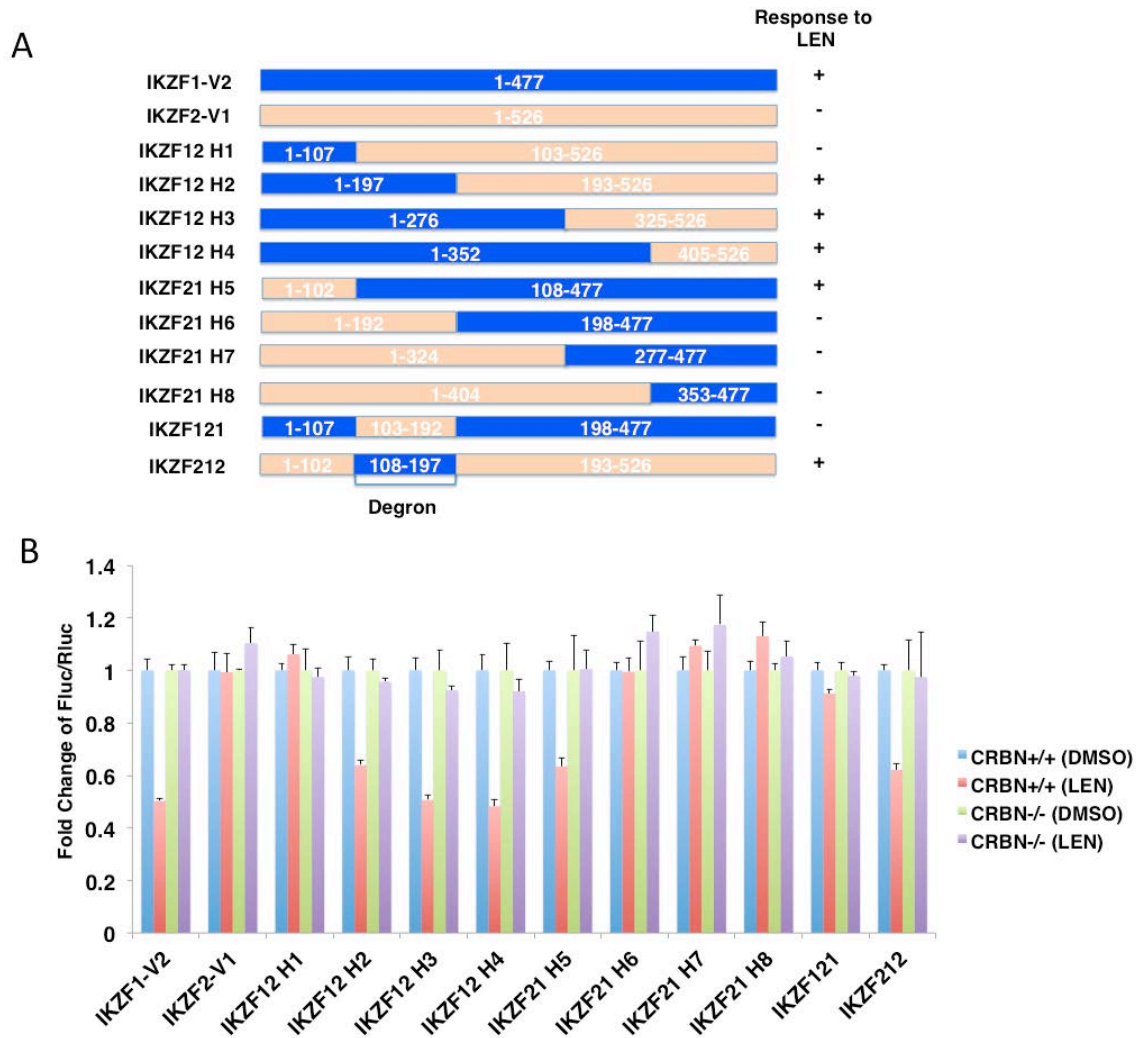

**Fig. S18. Cereblon-Dependent Regulation of IKZF1/IKZF2 Chimeras by Lenalidomide.** (A) Schematics of IKZF1/IKZF2 Chimeras. The IKZF1 degron (a.a. 108-197) recognized by cereblon is highlighted. (B) Firefly luciferase (Fluc)/Renilla luciferase (Rluc) ratios of *CRBN*<sup>+/+</sup> parental and *CRBN*<sup>-/-</sup> T11 293FT cells transfected to produce the indicated IKZF1/2 chimeras fused to firefly luciferase. Where indicated cells were treated with LEN (2  $\mu$ M) for 12 hours. Fluc/Rluc ratios were normalized to corresponding DMSO treated cells. Data are mean  $\pm$  SD, n=4.

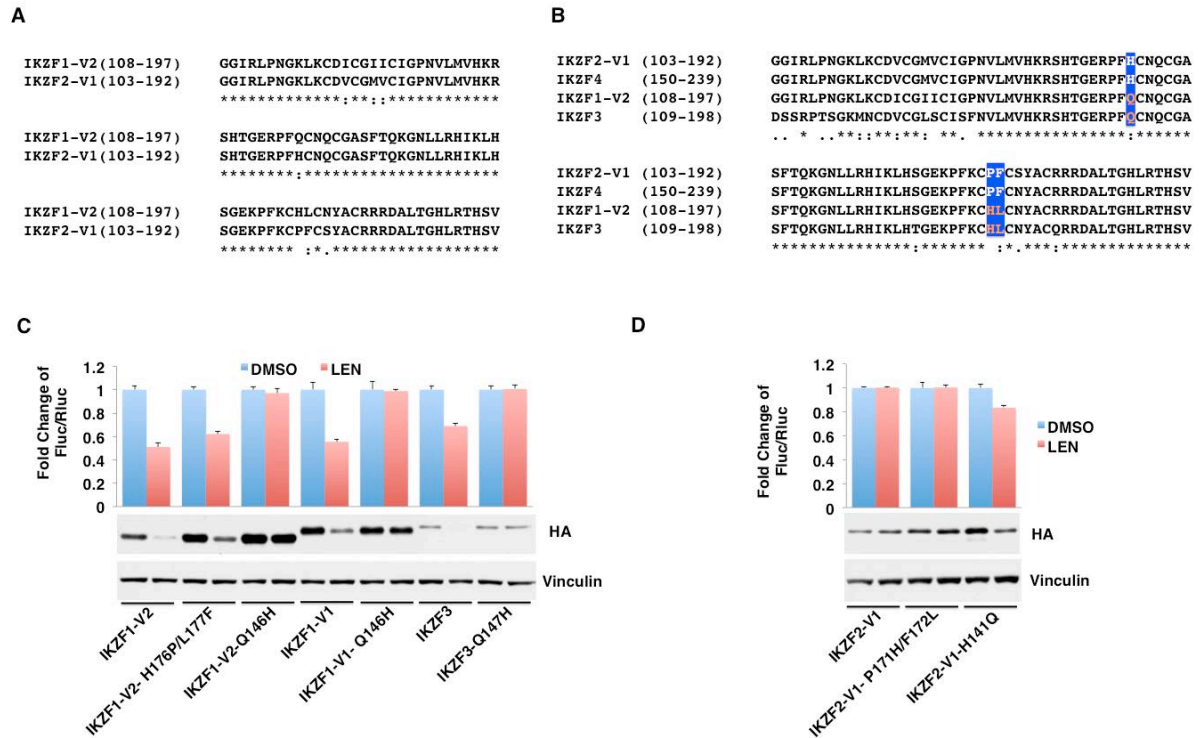

**Fig. S19. Cereblon-Dependent Regulation of IKZF1 and IKZF2 Substitution Mutants by Lenalidomide.** (A and B) Sequence alignments of IKZF1 degron recognized by cereblon with corresponding region of IKZF2 (A) and IKZF2, IKZF3, and IKZF4 (B). The amino acid residues that are identical in IKZF1 and IKZF3, but not in IKZF2 and IKZF4, are highlighted. (C and D) Firefly luciferase (Fluc)/Renilla luciferase (Rluc) ratios of *CRBN*<sup>+/+</sup> parental and *CRBN*<sup>-/-</sup> T11 293 FT cells transfected to produce the indicated IKZF variants fused to firefly luciferase (top panel) or HA epitope tag (bottom panels). Where indicated cells were treated with LEN (2  $\mu$ M) for 12 hours. Fluc/Rluc ratios were normalized to corresponding DMSO treated cells. Data are mean  $\pm$  SD, n=4.

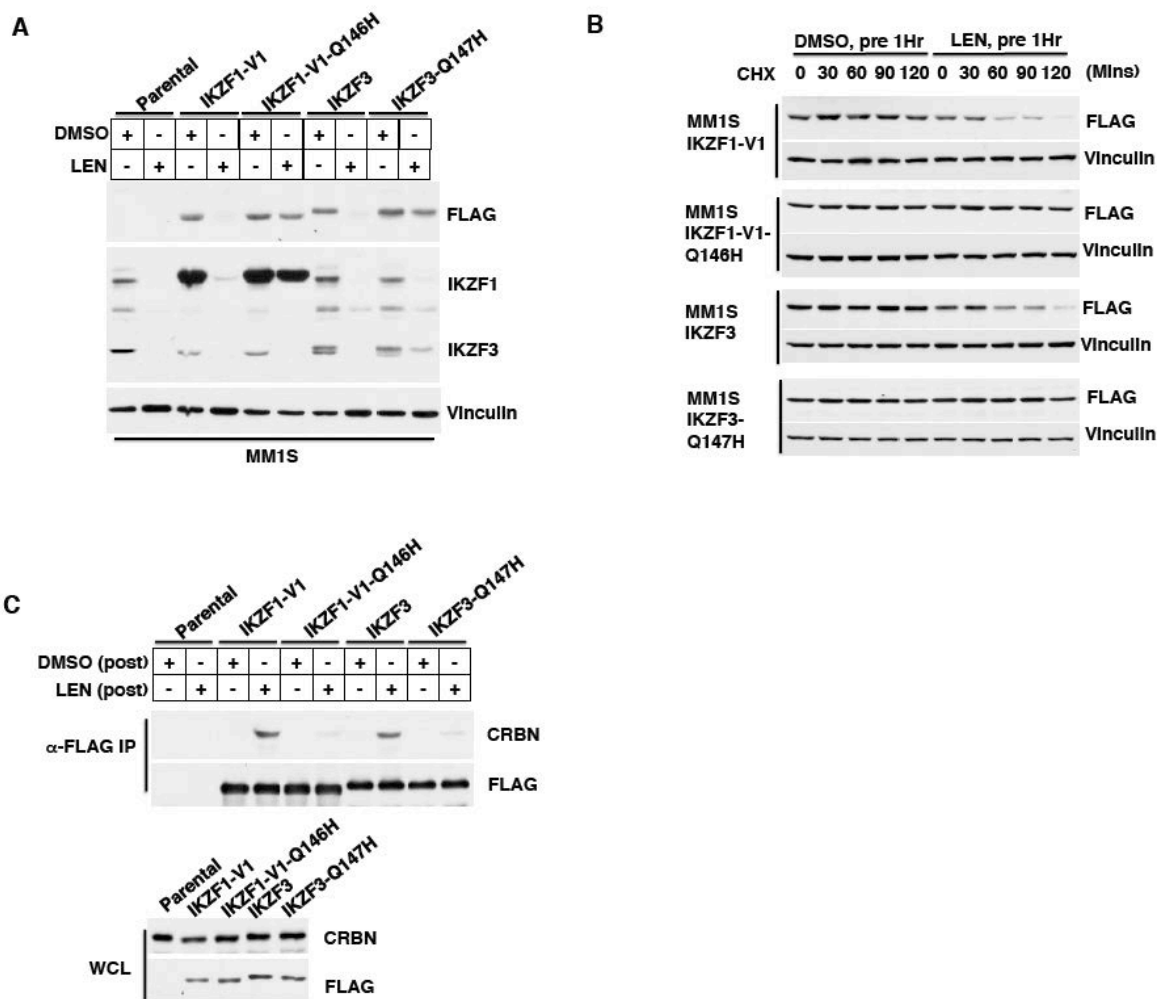

**Fig. S20. Substitution of Glutamine Residue in IKZF1 and IKZF3 with the Corresponding Histidine Residue in IKZF2 Prevents Lenalidomide Induced Degradation by Cereblon.** (A and B) Immunoblot analysis of MM1S parental cells and MM1S stable cell lines expressing the indicated IKZF proteins. In panel A, cells were treated with DMSO or LEN (2  $\mu$ M) for 24 hours before cell lysis. In panel B, cells were pretreated with DMSO or LEN (2  $\mu$ M) for 1 hour prior to the addition of cycloheximide (CHX) (100  $\mu$ g/mL) for the indicated periods. (C) Immunoblot analysis of anti-FLAG immunoprecipitates (top panels) or whole cell lysates (bottom panels) of MM1S parental cells or MM1S stable cell lines stably expressing the indicated IKZF. DMSO or LEN (10  $\mu$ M) was added into the binding assays during immunoprecipitation.

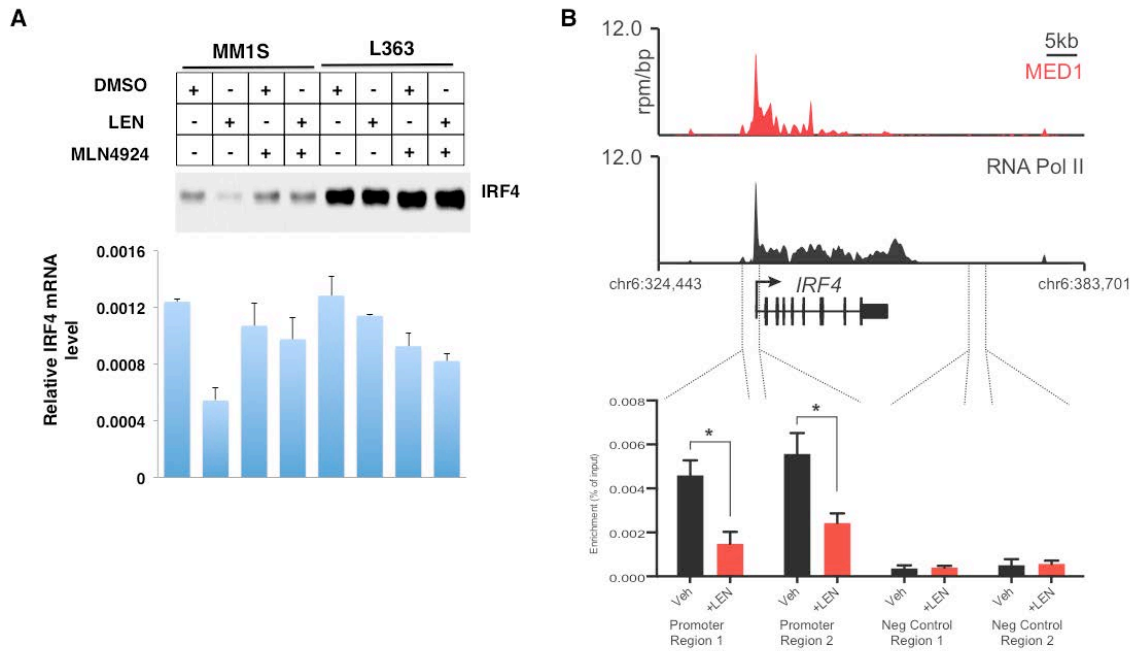

**Fig. S21. Regulation of IRF4 by IKZF1.** (A) Immunoblot (top) and real-time PCR (bottom) of IRF4 protein and mRNA levels, respectively, in MM1S and L363 myeloma cells treated with LEN (2  $\mu$ M) and MLN4924 (1  $\mu$ M) as indicated for 12 hours. Data are mean  $\pm$  SD, n=3. (B) Chromatin immunoprecipitation (ChIP) with an IKZF1 antibody at 2 sites within the IRF4 promoter region in MM1S cells treated with LEN (2  $\mu$ M) for 24 hours. Enrichment is shown as the percentage of total input DNA. Negative control region primers amplify downstream of the IRF4 coding region. Data are mean  $\pm$  SEM, n=3. \* indicates  $p < 0.05$  with unpaired t-test. For reference, published MM1S ChIP-seq data for MED1 and RNA Pol II showing enrichment at the IRF4 locus are shown (34).

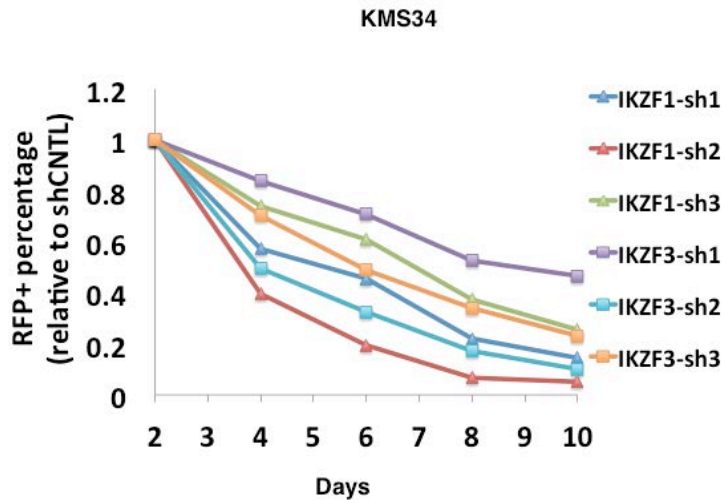

**Fig. S22. Anti-myeloma activity of Lenalidomide Linked to loss of IKZF1 and IKZF3.** Change in % RFP positivity over time in KMS34 cells infected with viruses encoding RFP and the indicated shRNAs. The day 2 % RFP for each virus was normalized to 1 and subsequent values were expressed relative to cells infected with a virus encoding RFP and a control (CNTL) shRNA.

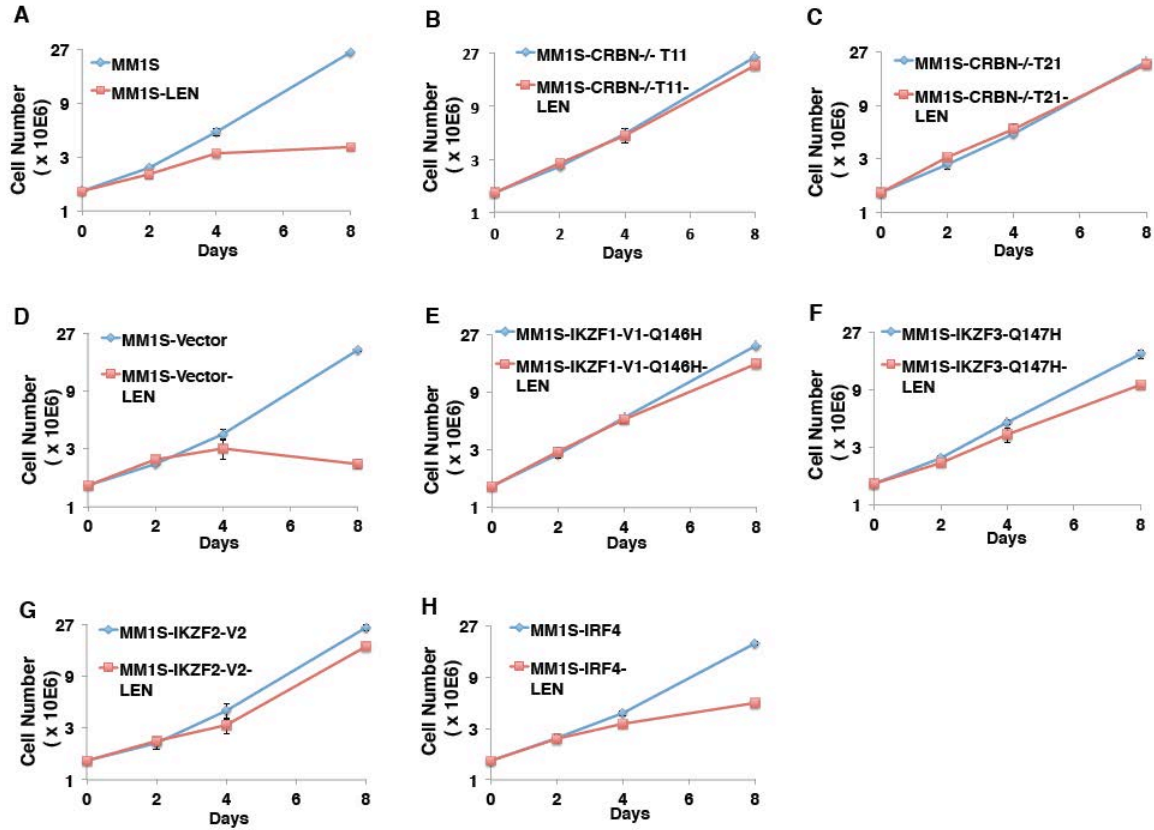

**Fig. S23. Stabilization of IKZF1 or IKZF3 Prevents the Anti-proliferative Effect of Lenalidomide in MM1S Cells.** (A-H) Cell proliferation curves of parental (A), *CRBN*<sup>-/-</sup>-T11 (B), and *CRBN*<sup>-/-</sup>-T21 (C), MM1S myeloma cells, as well as MM1S cell lines stably infected with plenti-CAG-IRES-GFP vectors encoding IKZF1-V1-Q146H (E), IKZF3-Q147H (F), IKZF2-V2 (G), IRF4 (H) or empty vector (D). Cells were cultured in the absence or presence of LEN (2  $\mu$ M) for 8 days. Data are mean  $\pm$  SEM, n=3.

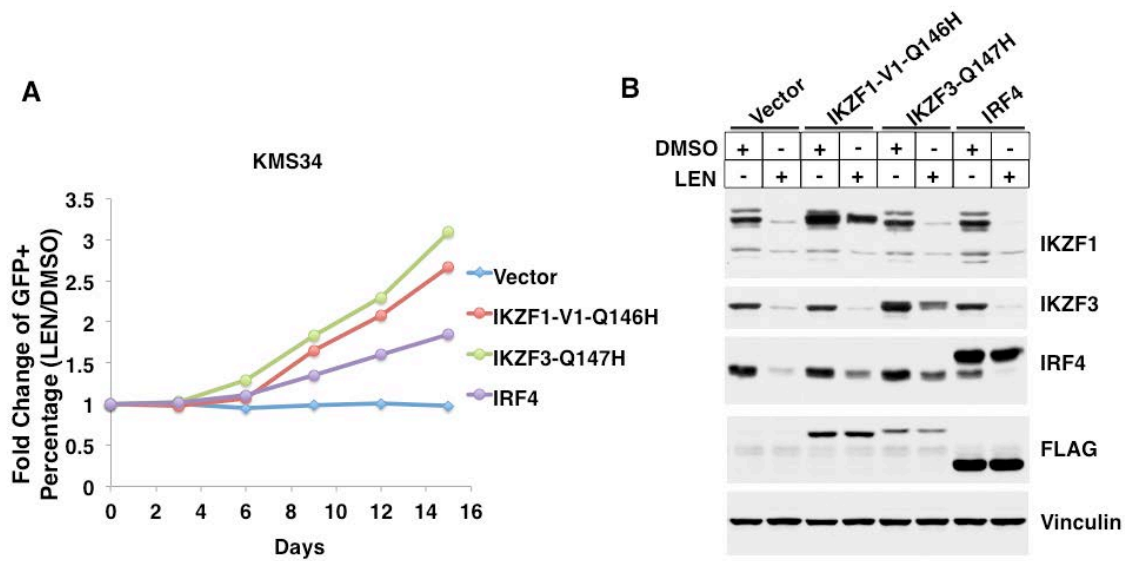

**Fig. S24. Stabilization of IKZF1 or IKZF3 Prevent the Anti-proliferative Effect of Lenalidomide in KMS34 Cells.** (A) KMS34 cells were infected with plenti-CAG-IRES-GFP vectors encoding indicated FLAG tagged proteins or empty vector control. Shown for each protein is the % GFP positivity for cells treated with LEN (10  $\mu$ M) for the indicated duration compared to DMSO. (B) Immunoblot analysis of KMS34 cells infected as in (A) and treated with DMSO or LEN (10  $\mu$ M) for 36 hours.



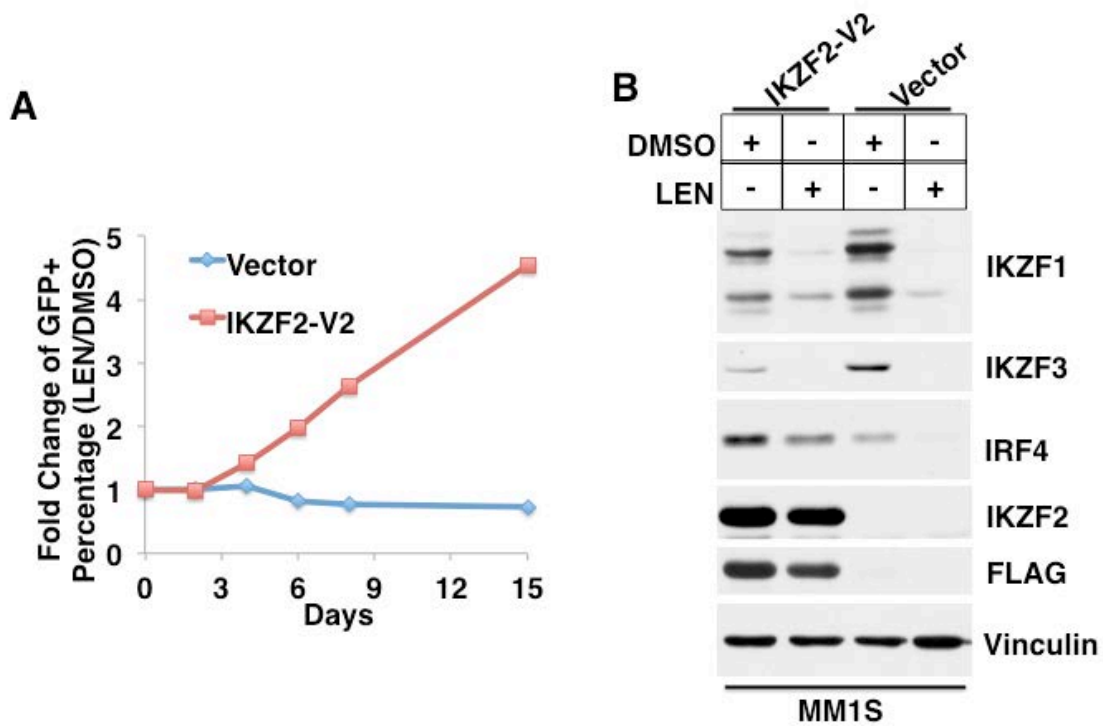

**Fig. S25. Ectopic Over-expression of IKZF2 Antagonizes the Lenalidomide Induced Cell Growth Defect in MM1S Cells.** (A) MM1S cells were infected with plenti-CAG-IRES-GFP encoding FLAG-tagged IKZF2-V2, or empty vector control. Shown is the % GFP positivity for each cell line treated with LEN (2  $\mu$ M) for the indicated duration compared to DMSO. (B) Immunoblot analysis of MM1S cells infected as in (A) and treated with DMSO or LEN (2  $\mu$ M) for 24 hours.

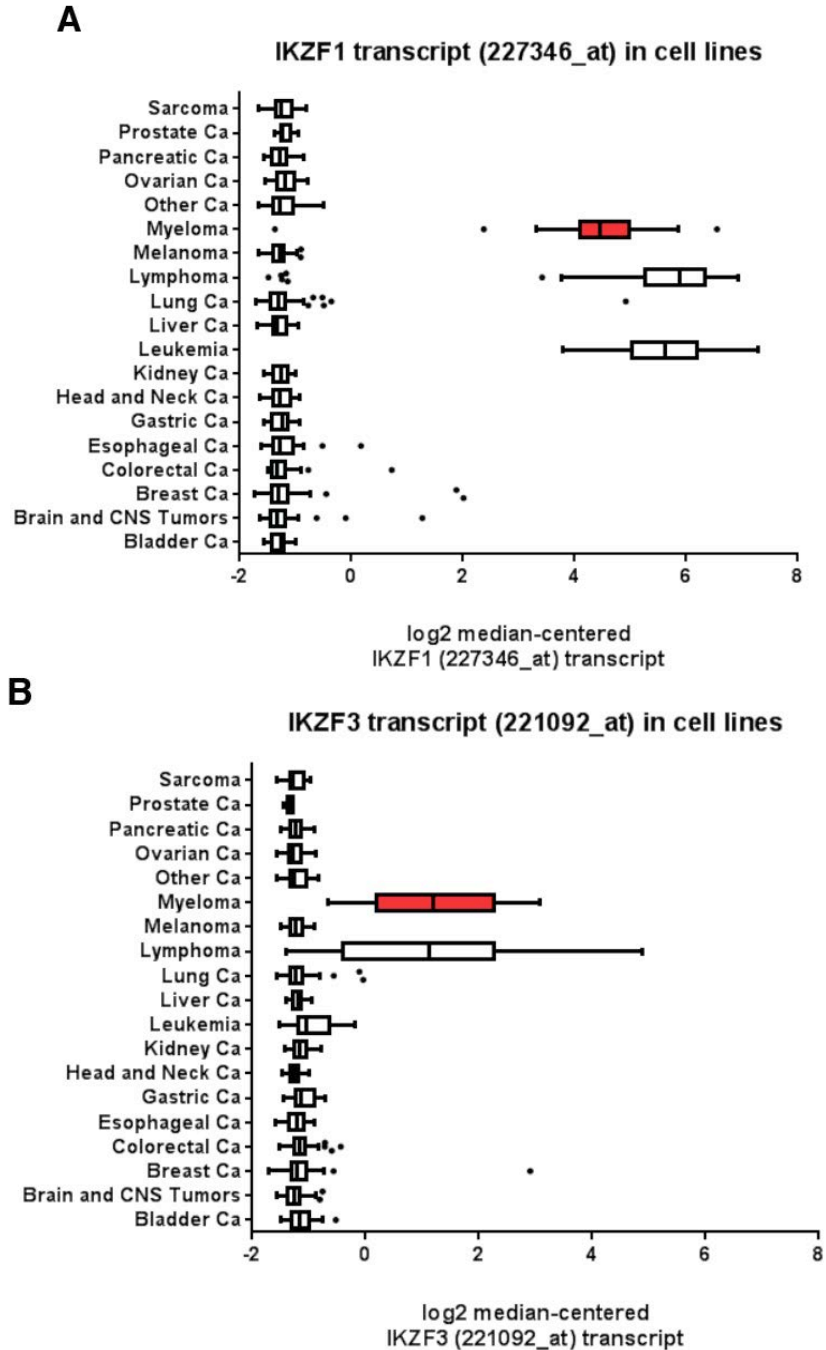

**Fig. S26. IKZF1 and IKZF3 are Expressed At Higher Level in Hematopoietic Malignancy Compared To Other Cancer Cell types.** (A and B) Relative abundance of IKZF1 mRNA (A) and IKZF3 mRNA (B) in the indicated cancer cell types quantified using Affymetrix IKZF1 probe set 227346\_at and IKZF3 probe set 220192\_at (Reanalysis, using Oncomine (oncomine.com), of data from Gene Expression Omnibus (GEO, <http://www.ncbi.nlm.nih.gov/geo/>) dataset GSE36133).

**Table S1. Ranked fold change of Fluc/Rluc of all ORFs tested.** Standard deviation is calculated as shown at the bottom of this table. ORFs whose FLuc/Rluc ratios were induced or reduced more than 3 standard deviation by LEN are labeled by red and yellow, respectively.

| Plate | Position | Internal_ID | GENE_ID | Symbol       | Fold Change of Fluc/Rluc (LEN/DMSO) [log] | Fold Change of Fluc/Rluc (LEN/DMSO) [Linear] |
|-------|----------|-------------|---------|--------------|-------------------------------------------|----------------------------------------------|
| 11080 | B08      | 2561        | 8204    | NRIP1        | -0.3428                                   | 0.4541                                       |
| 31004 | G10      | 11261       | 339512  | C1orf110     | -0.3326                                   | 0.4650                                       |
| 11082 | B07      | 9258        | 389458  | LOC389458    | -0.3217                                   | 0.4767                                       |
| 11029 | G09      | 10014       | 221416  | C6orf223     | -0.3141                                   | 0.4852                                       |
| 11082 | H06      | 2406        | NA      | NA           | -0.3110                                   | 0.4886                                       |
| 11038 | B09      | 6052        | 1736    | DKC1         | -0.3017                                   | 0.4992                                       |
| 51034 | H06      | 54345       | 55554   | KLK15        | -0.2982                                   | 0.5033                                       |
| 31022 | H03      | 13406       | 91272   | BOD1         | -0.2896                                   | 0.5134                                       |
| 11084 | G04      | 8079        | 122970  | ACOT4        | -0.2891                                   | 0.5139                                       |
| 11020 | E05      | 8002        | 79031   | PDCL3        | -0.2874                                   | 0.5159                                       |
| 11064 | G07      | 2289        | 144577  | C12orf66     | -0.2869                                   | 0.5165                                       |
| 11038 | H02      | 2463        | 9139    | CBFA2T2      | -0.2820                                   | 0.5224                                       |
| 11024 | F03      | 4637        | 629     | CFB          | -0.2729                                   | 0.5334                                       |
| 11024 | E08      | 8220        | 27042   | C1orf107     | -0.2719                                   | 0.5347                                       |
| 31024 | C04      | 13407       | 7266    | DNAJC7       | -0.2683                                   | 0.5391                                       |
| 31009 | C10      | 11731       | 55178   | RNMTL1       | -0.2665                                   | 0.5413                                       |
| 31030 | F12      | 14246       | 4641    | MYO1C        | -0.2644                                   | 0.5440                                       |
| 31011 | A09      | 11911       | 286016  | TPI1P2       | -0.2613                                   | 0.5479                                       |
| 11038 | G02      | 5400        | 54973   | CPSF3L       | -0.2607                                   | 0.5486                                       |
| 11058 | A12      | 3916        | 6944    | VPS72        | -0.2457                                   | 0.5679                                       |
| 51013 | A07      | 13943       | 9247    | GCM2         | -0.2449                                   | 0.5689                                       |
| 11072 | G10      | 2659        | 9779    | TBC1D5       | -0.2441                                   | 0.5700                                       |
| 11024 | B05      | 4311        | 960     | CD44         | -0.2431                                   | 0.5714                                       |
| 11082 | C07      | 5600        | 1208    | CLPS         | -0.2413                                   | 0.5737                                       |
| 11065 | A06      | 1209        | 55808   | ST6GALNAC1   | -0.2381                                   | 0.5780                                       |
| 11048 | A06      | 6442        | 374     | AREG         | -0.2373                                   | 0.5790                                       |
| 11084 | C07      | 6790        | 80233   | C17orf70     | -0.2320                                   | 0.5862                                       |
| 11042 | G02      | 8249        | 219833  | C11orf45     | -0.2315                                   | 0.5868                                       |
| 11024 | E07      | 3321        | 1374    | CPT1A        | -0.2300                                   | 0.5888                                       |
| 11042 | E08      | 7003        | 360132  | FKBP9L       | -0.2285                                   | 0.5909                                       |
| 11040 | H06      | 6318        | 8367    | HIST1H4E     | -0.2281                                   | 0.5914                                       |
| 11038 | C06      | 5336        | 25793   | FBXO7        | -0.2211                                   | 0.6010                                       |
| 31002 | F06      | 10315       | 6557    | SLC12A1      | -0.2210                                   | 0.6012                                       |
| 11067 | D12      | 10016       | 22806   | <b>IKZF3</b> | -0.2207                                   | 0.6015                                       |
| 11038 | E08      | 5255        | 5327    | PLAT         | -0.2201                                   | 0.6024                                       |
| 11029 | F05      | 10136       | 1588    | CYP19A1      | -0.2178                                   | 0.6056                                       |
| 11038 | B01      | 3212        | 224     | ALDH3A2      | -0.2175                                   | 0.6060                                       |

|       |     |       |        |           |         |        |
|-------|-----|-------|--------|-----------|---------|--------|
| 31005 | G08 | 10894 | 160140 | C11orf65  | -0.2161 | 0.6081 |
| 11012 | E12 | 5390  | 57003  | CCDC47    | -0.2159 | 0.6083 |
| 11083 | B04 | 2738  | 9804   | TOMM20    | -0.2140 | 0.6109 |
| 31004 | A10 | 11031 | 6133   | RPL9      | -0.2127 | 0.6127 |
| 11037 | H03 | 4971  | 9397   | NMT2      | -0.2118 | 0.6141 |
| 11083 | A08 | 9795  | 25788  | RAD54B    | -0.2116 | 0.6144 |
| 11080 | A06 | 6222  | 10743  | RAI1      | -0.2114 | 0.6147 |
| 11041 | H08 | 4150  | 51330  | TNFRSF12A | -0.2104 | 0.6161 |
| 31007 | H04 | 11248 | 10640  | EXOC5     | -0.2101 | 0.6164 |
| 51013 | D12 | 53449 | 60506  | NYX       | -0.2078 | 0.6197 |
| 11021 | D02 | 4065  | 23552  | CDK20     | -0.2078 | 0.6197 |
| 11083 | C04 | 8755  | 53346  | TM6SF1    | -0.2075 | 0.6202 |
| 11040 | B08 | 8903  | 5098   | PCDHGC3   | -0.2069 | 0.6210 |
| 11025 | G06 | 4787  | 9883   | POM121    | -0.2067 | 0.6213 |
| 11042 | E02 | 5612  | 10438  | C1D       | -0.2061 | 0.6221 |
| 11039 | D01 | 2100  | 5475   | PPEF1     | -0.2045 | 0.6244 |
| 11021 | E11 | 5712  | 7170   | TPM3      | -0.2040 | 0.6251 |
| 31002 | G03 | 10293 | 7850   | IL1R2     | -0.2035 | 0.6258 |
| 31021 | D07 | 13200 | 9390   | SLC22A13  | -0.2029 | 0.6268 |
| 11038 | G11 | 6265  | 10802  | SEC24A    | -0.2024 | 0.6275 |
| 51017 | C11 | 55993 | 221262 | CCDC162   | -0.2021 | 0.6279 |
| 31004 | G05 | 11013 | 11107  | PRDM5     | -0.2020 | 0.6281 |
| 31018 | B07 | 13040 | 91408  | BTF3L4    | -0.2017 | 0.6284 |
| 31030 | G02 | 14311 | 4481   | MSR1      | -0.2013 | 0.6290 |
| 11025 | F05 | 1994  | 9510   | ADAMTS1   | -0.2011 | 0.6293 |
| 51018 | C05 | 56099 | 5686   | PSMA5     | -0.2004 | 0.6304 |
| 11045 | B06 | 9280  | 8764   | TNFRSF14  | -0.2002 | 0.6307 |
| 31009 | C12 | 11572 | 1855   | DVL1      | -0.2002 | 0.6307 |
| 31009 | D05 | 11499 | 84315  | MON1A     | -0.2000 | 0.6309 |
| 11070 | H04 | 9529  | 23373  | CRTC1     | -0.1998 | 0.6313 |
| 31013 | B08 | 12106 | 6953   | TCP10     | -0.1997 | 0.6313 |
| 11030 | G09 | 8004  | 3125   | HLA-DRB3  | -0.1996 | 0.6316 |
| 11042 | G08 | 6821  | 6217   | RPS16     | -0.1979 | 0.6340 |
| 11048 | D06 | 4069  | 10935  | PRDX3     | -0.1976 | 0.6345 |
| 11038 | E04 | 5881  | 9252   | RPS6KA5   | -0.1972 | 0.6350 |
| 11037 | H08 | 8593  | 10768  | AHCYL1    | -0.1964 | 0.6362 |
| 11029 | H11 | 7747  | 60488  | MRPS35    | -0.1963 | 0.6363 |
| 11025 | D09 | 8208  | 5925   | RB1       | -0.1960 | 0.6368 |
| 31036 | D04 | 11311 | 10724  | MGEA5     | -0.1960 | 0.6369 |
| 11009 | H09 | 3000  | 55795  | PCID2     | -0.1938 | 0.6401 |
| 11079 | C11 | 1767  | 10208  | USPL1     | -0.1936 | 0.6403 |
| 31033 | D07 | 14925 | 57150  | C6orf162  | -0.1931 | 0.6410 |
| 11028 | B08 | 8631  | 84548  | TMEM185A  | -0.1929 | 0.6413 |
| 11065 | D09 | 2940  | 10320  | IKZF1     | -0.1928 | 0.6415 |

|       |     |       |        |              |         |        |
|-------|-----|-------|--------|--------------|---------|--------|
| 11029 | B09 | 4626  | 55122  | AKIRIN2      | -0.1927 | 0.6416 |
| 11042 | H03 | 4375  | 2922   | GRP          | -0.1924 | 0.6420 |
| 31001 | A11 | 10294 | 10462  | CLEC10A      | -0.1923 | 0.6423 |
| 11061 | E07 | 9979  | 10390  | CEPT1        | -0.1921 | 0.6426 |
| 31006 | B03 | 11106 | 160419 | C12orf50     | -0.1918 | 0.6431 |
| 11029 | D11 | 3086  | 9570   | GOSR2        | -0.1912 | 0.6438 |
| 11083 | D09 | 628   | 54509  | RHOF         | -0.1901 | 0.6455 |
| 51016 | C10 | 56588 | 60467  | BPESC1       | -0.1895 | 0.6464 |
| 11042 | G04 | 5572  | 7336   | UBE2V2       | -0.1894 | 0.6465 |
| 11080 | H07 | 1543  | 118987 | PDZD8        | -0.1890 | 0.6472 |
| 31038 | A03 | 14810 | NA     | NA           | -0.1884 | 0.6481 |
| 11070 | F06 | 9903  | 84889  | SLC7A3       | -0.1884 | 0.6481 |
| 31016 | H07 | 12436 | 286046 | XKR6         | -0.1883 | 0.6481 |
| 11042 | G10 | 8999  | 7276   | TTR          | -0.1880 | 0.6486 |
| 31005 | G09 | 11224 | 53829  | P2RY13       | -0.1866 | 0.6508 |
| 11061 | G05 | 5639  | 84924  | ZNF566       | -0.1864 | 0.6510 |
| 51013 | F01 | 53848 | 7365   | UGT2B10      | -0.1856 | 0.6522 |
| 31025 | D06 | 13429 | 63922  | CHTF18       | -0.1853 | 0.6527 |
| 51020 | F02 | 55842 | 9127   | P2RX6        | -0.1851 | 0.6530 |
| 11026 | H03 | 1903  | 26070  | DKFZP434K028 | -0.1841 | 0.6545 |
| 51025 | B07 | 56861 | 9839   | ZEB2         | -0.1836 | 0.6553 |
| 11041 | D12 | 5780  | 9550   | ATP6V1G1     | -0.1833 | 0.6557 |
| 51010 | B06 | 54455 | 580    | BARD1        | -0.1833 | 0.6557 |
| 51015 | H06 | 52670 | 79923  | NANOG        | -0.1827 | 0.6567 |
| 11038 | H11 | 7345  | 2801   | GOLGA2       | -0.1820 | 0.6577 |
| 11066 | D07 | 9520  | 151295 | SLC23A3      | -0.1819 | 0.6577 |
| 11081 | H06 | 2451  | 10230  | NBR2         | -0.1817 | 0.6581 |
| 31010 | H07 | 11775 | 79066  | METT10D      | -0.1817 | 0.6582 |
| 11059 | E03 | 1350  | 125972 | CALR3        | -0.1815 | 0.6584 |
| 51009 | B02 | 53072 | 7093   | TLL2         | -0.1810 | 0.6592 |
| 31020 | G05 | 13120 | 80008  | TMEM156      | -0.1807 | 0.6597 |
| 11032 | E03 | 2198  | 54943  | DNAJC28      | -0.1807 | 0.6597 |
| 11042 | H09 | 5697  | 805    | CALM2        | -0.1805 | 0.6599 |
| 31008 | H08 | 11422 | 53615  | MBD3         | -0.1800 | 0.6607 |
| 31032 | B06 | 14479 | 57718  | PPP4R4       | -0.1795 | 0.6614 |
| 51018 | E07 | 56557 | 3117   | HLA-DQA1     | -0.1794 | 0.6617 |
| 11059 | A07 | 4968  | 3352   | HTR1D        | -0.1792 | 0.6618 |
| 11062 | E10 | 9880  | 152006 | RNF38        | -0.1780 | 0.6637 |
| 51018 | H09 | 56004 | 3123   | HLA-DRB1     | -0.1770 | 0.6652 |
| 31022 | A12 | 13540 | 147007 | TMEM199      | -0.1770 | 0.6653 |
| 51029 | A01 | 55508 | 6566   | SLC16A1      | -0.1769 | 0.6654 |
| 11079 | G03 | 1507  | 5168   | ENPP2        | -0.1769 | 0.6654 |
| 51025 | A10 | 55351 | 7159   | TP53BP2      | -0.1769 | 0.6655 |
| 11072 | A02 | 7729  | 28231  | SLCO4A1      | -0.1768 | 0.6656 |

|       |     |       |        |           |         |        |
|-------|-----|-------|--------|-----------|---------|--------|
| 31004 | B08 | 11017 | 54458  | PRR13     | -0.1763 | 0.6663 |
| 31009 | D02 | 11325 | 9406   | ZRANB2    | -0.1762 | 0.6665 |
| 51025 | A09 | 53366 | 5140   | PDE3B     | -0.1756 | 0.6674 |
| 11038 | A11 | 3697  | 4771   | NF2       | -0.1753 | 0.6679 |
| 11030 | H09 | 3576  | 78989  | COLEC11   | -0.1741 | 0.6697 |
| 51020 | B05 | 56577 | 219899 | TBCEL     | -0.1734 | 0.6708 |
| 31007 | E03 | 10882 | 256051 | ZNF549    | -0.1732 | 0.6711 |
| 11041 | E09 | 8663  | 124602 | KIF19     | -0.1727 | 0.6718 |
| 51012 | F09 | 54259 | 283847 | CCDC79    | -0.1725 | 0.6722 |
| 11038 | H09 | 7047  | 2110   | ETFDH     | -0.1721 | 0.6728 |
| 31022 | B05 | 13362 | 11019  | LIAS      | -0.1715 | 0.6738 |
| 31028 | G09 | 15063 | 414060 | TBC1D3C   | -0.1710 | 0.6745 |
| 31037 | B08 | 14116 | 4651   | MYO10     | -0.1710 | 0.6745 |
| 31001 | A08 | 10710 | 2823   | GPM6A     | -0.1698 | 0.6763 |
| 51009 | G11 | 53472 | 57181  | SLC39A10  | -0.1698 | 0.6764 |
| 11042 | H04 | 395   | 801    | CALM1     | -0.1687 | 0.6781 |
| 11079 | G04 | 6789  | 23258  | DENND5A   | -0.1686 | 0.6783 |
| 11054 | A07 | 10021 | 5359   | PLSCR1    | -0.1686 | 0.6783 |
| 11080 | E12 | 2004  | 1277   | COL1A1    | -0.1682 | 0.6789 |
| 11082 | D01 | 9142  | 8034   | SLC25A16  | -0.1674 | 0.6802 |
| 11026 | G05 | 635   | 81606  | LBH       | -0.1672 | 0.6804 |
| 31045 | H09 | 3870  | 114884 | OSBPL10   | -0.1664 | 0.6817 |
| 11041 | A11 | 8934  | 80832  | APOL4     | -0.1663 | 0.6819 |
| 51017 | G01 | 55931 | 60675  | PROK2     | -0.1661 | 0.6822 |
| 11025 | G07 | 1383  | 91147  | TMEM67    | -0.1658 | 0.6827 |
| 11070 | E09 | 9796  | 163081 | ZNF567    | -0.1657 | 0.6828 |
| 11038 | G06 | 1894  | 150350 | ENTHD1    | -0.1655 | 0.6831 |
| 31015 | A11 | 12706 | 51390  | AIG1      | -0.1652 | 0.6836 |
| 11063 | D06 | 5686  | 3646   | EIF3E     | -0.1649 | 0.6840 |
| 31003 | H01 | 10682 | 342926 | ZNF677    | -0.1648 | 0.6843 |
| 51034 | A07 | 54156 | 348825 | TPRXL     | -0.1648 | 0.6843 |
| 11029 | D05 | 3245  | 1364   | CLDN4     | -0.1647 | 0.6844 |
| 51029 | E12 | 56936 | 494513 | DFNB59    | -0.1647 | 0.6844 |
| 11083 | G05 | 1672  | 9377   | COX5A     | -0.1647 | 0.6844 |
| 11072 | E10 | 1370  | 63926  | ANKRD5    | -0.1645 | 0.6847 |
| 11039 | C06 | 7791  | 9855   | FARP2     | -0.1643 | 0.6850 |
| 11043 | B07 | 8538  | 221060 | C10orf111 | -0.1642 | 0.6851 |
| 11027 | A06 | 930   | 51527  | C14orf129 | -0.1641 | 0.6853 |
| 11083 | G10 | 8401  | 2815   | GP9       | -0.1638 | 0.6858 |
| 11037 | F06 | 6483  | 7384   | UQCRC1    | -0.1632 | 0.6868 |
| 11039 | H10 | 8066  | 715    | C1R       | -0.1631 | 0.6868 |
| 11029 | H09 | 4686  | 26022  | TMEM98    | -0.1631 | 0.6869 |
| 51022 | G05 | 55873 | 4552   | MTRR      | -0.1629 | 0.6872 |
| 31033 | B06 | 14839 | 284802 | FRG1B     | -0.1629 | 0.6872 |

|       |     |       |        |           |         |        |
|-------|-----|-------|--------|-----------|---------|--------|
| 11021 | G01 | 3874  | 11316  | COPE      | -0.1627 | 0.6876 |
| 51009 | D01 | 53119 | 57167  | SALL4     | -0.1625 | 0.6879 |
| 11058 | F11 | 9766  | 92822  | ZNF276    | -0.1620 | 0.6887 |
| 11020 | D03 | 7740  | NA     | NA        | -0.1616 | 0.6894 |
| 31011 | B05 | 12117 | 5586   | PKN2      | -0.1615 | 0.6895 |
| 51011 | D06 | 53706 | 79072  | FASTKD3   | -0.1610 | 0.6902 |
| 11058 | C12 | 1845  | 6455   | SH3GL1    | -0.1604 | 0.6912 |
| 31025 | H04 | 13529 | 84632  | AFAPIL2   | -0.1601 | 0.6916 |
| 11005 | A02 | 2664  | 57186  | RALGAPA2  | -0.1601 | 0.6917 |
| 31042 | D05 | 6797  | 204    | AK2       | -0.1601 | 0.6917 |
| 11040 | D10 | 8713  | 132141 | IQCF1     | -0.1600 | 0.6919 |
| 11041 | B04 | 4977  | 1337   | COX6A1    | -0.1599 | 0.6919 |
| 11028 | C04 | 2497  | 146395 | GSG1L     | -0.1596 | 0.6925 |
| 31014 | E10 | 12381 | 54676  | GTPBP2    | -0.1593 | 0.6930 |
| 11038 | F05 | 5907  | 27161  | EIF2C2    | -0.1592 | 0.6932 |
| 11042 | A04 | 5127  | 79760  | GEMIN7    | -0.1591 | 0.6932 |
| 31030 | F09 | 14308 | 7552   | ZNF711    | -0.1589 | 0.6936 |
| 11082 | G05 | 355   | 23362  | PSD3      | -0.1589 | 0.6936 |
| 11029 | A05 | 1111  | 3589   | IL11      | -0.1586 | 0.6940 |
| 11070 | H09 | 290   | 55917  | CTTNBP2NL | -0.1585 | 0.6942 |
| 11058 | E12 | 6817  | 10488  | CREB3     | -0.1585 | 0.6943 |
| 51010 | H01 | 54146 | 222223 | KIAA1324L | -0.1583 | 0.6945 |
| 51026 | A10 | 53374 | 55521  | TRIM36    | -0.1582 | 0.6947 |
| 51011 | G03 | 53048 | 54567  | DLL4      | -0.1581 | 0.6949 |
| 11020 | F02 | 7325  | 115908 | CTHRC1    | -0.1577 | 0.6955 |
| 11005 | D07 | 8390  | 2999   | GZMH      | -0.1576 | 0.6957 |
| 11025 | H07 | 4899  | 8449   | DHX16     | -0.1571 | 0.6965 |
| 31045 | D06 | 3244  | 6152   | RPL24     | -0.1569 | 0.6968 |
| 11039 | D10 | 6167  | 2022   | ENG       | -0.1569 | 0.6969 |
| 51010 | E12 | 54577 | 58504  | ARHGAP22  | -0.1568 | 0.6970 |
| 31016 | B05 | 12410 | 54     | ACP5      | -0.1566 | 0.6972 |
| 31019 | E11 | 13133 | 60492  | CCDC90B   | -0.1565 | 0.6974 |
| 11083 | A02 | 9867  | 89882  | TPD52L3   | -0.1565 | 0.6974 |
| 11042 | H01 | 5472  | 6157   | RPL27A    | -0.1563 | 0.6977 |
| 11027 | F01 | 8057  | 79698  | ZMAT4     | -0.1562 | 0.6979 |
| 11051 | D07 | 5120  | 84985  | FAM83A    | -0.1562 | 0.6980 |
| 11040 | D07 | 7874  | 53822  | FXYD7     | -0.1558 | 0.6985 |
| 11064 | A12 | 7614  | 84958  | SYTL1     | -0.1556 | 0.6989 |
| 11083 | E02 | 192   | 55166  | CENPQ     | -0.1552 | 0.6996 |
| 51016 | E02 | 53499 | 4295   | MLN       | -0.1550 | 0.6998 |
| 11012 | A02 | 8500  | 5624   | PROC      | -0.1550 | 0.6999 |
| 11024 | E05 | 4615  | 51433  | ANAPC5    | -0.1547 | 0.7003 |
| 11021 | B05 | 5507  | 1504   | CTRB1     | -0.1543 | 0.7010 |
| 31016 | G05 | 12698 | 116092 | DNTTIP1   | -0.1543 | 0.7010 |

|       |     |       |        |          |         |        |
|-------|-----|-------|--------|----------|---------|--------|
| 11024 | B04 | 3640  | 11253  | MAN1B1   | -0.1542 | 0.7011 |
| 11042 | E03 | 4986  | 85013  | TMEM128  | -0.1541 | 0.7013 |
| 31007 | G11 | 11583 | 91582  | RPS19BP1 | -0.1540 | 0.7015 |
| 11081 | D04 | 6147  | NA     | NA       | -0.1539 | 0.7017 |
| 31014 | C05 | 12293 | 1998   | ELF2     | -0.1537 | 0.7019 |
| 11083 | A06 | 8747  | 4637   | MYL6     | -0.1537 | 0.7019 |
| 11042 | F07 | 6635  | 51079  | NDUFA13  | -0.1534 | 0.7024 |
| 11021 | D03 | 4667  | 5432   | POLR2C   | -0.1534 | 0.7024 |
| 31014 | C02 | 12330 | 23107  | MRPS27   | -0.1532 | 0.7027 |
| 11038 | A07 | 5229  | 311    | ANXA11   | -0.1531 | 0.7028 |
| 31025 | A05 | 13553 | 4439   | MSH5     | -0.1530 | 0.7031 |
| 31004 | A01 | 10739 | 81624  | DIAPH3   | -0.1528 | 0.7034 |
| 51020 | C10 | 55880 | 10333  | TLR6     | -0.1528 | 0.7034 |
| 51012 | H04 | 54185 | 8224   | SYN3     | -0.1528 | 0.7034 |
| 51016 | F03 | 56727 | 118425 | GDEP     | -0.1525 | 0.7039 |
| 51026 | F03 | 56419 | 140612 | ZFP28    | -0.1525 | 0.7040 |
| 31038 | E09 | 5863  | 51074  | APIP     | -0.1524 | 0.7040 |
| 31021 | B02 | 13126 | 79982  | DNAJB14  | -0.1519 | 0.7048 |
| 51016 | D01 | 53891 | 158801 | NKAPP1   | -0.1518 | 0.7051 |
| 51020 | E02 | 56247 | 162993 | ZNF846   | -0.1517 | 0.7052 |
| 31037 | C04 | 12685 | 23132  | RAD54L2  | -0.1509 | 0.7065 |
| 51020 | A09 | 56365 | 114026 | ZIM3     | -0.1503 | 0.7074 |
| 11038 | F12 | 1970  | 149647 | FAM71A   | -0.1502 | 0.7077 |
| 11087 | C09 | 1328  | 26266  | SLC13A4  | -0.1500 | 0.7079 |
| 11080 | D06 | 8717  | 57634  | EP400    | -0.1498 | 0.7083 |
| 31021 | D09 | 13234 | 91614  | DEPDC7   | -0.1497 | 0.7084 |
| 11083 | F03 | 185   | 55916  | NXT2     | -0.1496 | 0.7086 |
| 31043 | F02 | 7556  | 219970 | GLYATL2  | -0.1496 | 0.7086 |
| 51017 | H06 | 55768 | 6759   | SSX4     | -0.1490 | 0.7095 |
| 11058 | H01 | 10209 | 1235   | CCR6     | -0.1490 | 0.7096 |
| 11040 | H05 | 8223  | 554313 | HIST2H4B | -0.1490 | 0.7096 |
| 11088 | A07 | 7307  | 160    | AP2A1    | -0.1489 | 0.7097 |
| 11003 | B07 | 6001  | 29100  | TMEM208  | -0.1489 | 0.7098 |
| 51003 | C08 | 53101 | 11062  | DUS4L    | -0.1482 | 0.7109 |
| 11040 | H10 | 8248  | 25758  | C11orf41 | -0.1478 | 0.7115 |
| 31032 | B01 | 14596 | 83873  | GPR61    | -0.1478 | 0.7115 |
| 51009 | A02 | 53121 | 5651   | TMPRSS15 | -0.1478 | 0.7116 |
| 51012 | H03 | 54811 | 161779 | PGBD4    | -0.1477 | 0.7117 |
| 51017 | F09 | 56704 | 6048   | RNF5     | -0.1474 | 0.7121 |
| 11054 | D10 | 4052  | 6396   | SEC13    | -0.1473 | 0.7124 |
| 51005 | E09 | 54127 | 122970 | ACOT4    | -0.1471 | 0.7127 |
| 11029 | H07 | 2774  | 373156 | GSTK1    | -0.1470 | 0.7128 |
| 11058 | F12 | 924   | 54953  | C1orf27  | -0.1470 | 0.7128 |
| 11040 | H11 | 4325  | 57402  | S100A14  | -0.1467 | 0.7134 |



|       |     |       |        |           |         |        |
|-------|-----|-------|--------|-----------|---------|--------|
| 51010 | A03 | 52678 | 56122  | PCDHB14   | -0.1467 | 0.7134 |
| 11037 | G06 | 8082  | 5184   | PEPD      | -0.1466 | 0.7135 |
| 11050 | C09 | 513   | 79152  | FA2H      | -0.1462 | 0.7142 |
| 11042 | G11 | 5743  | 7321   | UBE2D1    | -0.1462 | 0.7142 |
| 31002 | H06 | 10533 | 93979  | CPA5      | -0.1462 | 0.7142 |
| 51012 | G11 | 54042 | 246213 | SLC17A8   | -0.1460 | 0.7145 |
| 11042 | D11 | 1974  | 256369 | C14orf48  | -0.1458 | 0.7149 |
| 11056 | D01 | 3173  | 10421  | CD2BP2    | -0.1456 | 0.7151 |
| 31029 | E02 | 14394 | 6217   | RPS16     | -0.1456 | 0.7151 |
| 11028 | A02 | 2663  | 10537  | UBD       | -0.1453 | 0.7156 |
| 11026 | H04 | 20    | 78996  | C7orf49   | -0.1451 | 0.7160 |
| 31002 | H02 | 10549 | 54619  | CCNJ      | -0.1450 | 0.7162 |
| 31041 | D03 | 6847  | 89122  | TRIM4     | -0.1450 | 0.7162 |
| 11088 | G05 | 8422  | 3549   | IHH       | -0.1449 | 0.7162 |
| 11070 | C09 | 7777  | 22955  | SCMH1     | -0.1445 | 0.7170 |
| 11070 | B11 | 10090 | 55671  | SMEK1     | -0.1444 | 0.7171 |
| 11021 | F12 | 3529  | 11167  | FSTL1     | -0.1441 | 0.7176 |
| 31018 | H01 | 12915 | 348235 | SKA2      | -0.1438 | 0.7181 |
| 51010 | H05 | 52860 | 10631  | POSTN     | -0.1438 | 0.7181 |
| 11086 | B01 | 1497  | 92565  | FANK1     | -0.1436 | 0.7184 |
| 31016 | F11 | 12579 | 26164  | GTPBP5    | -0.1435 | 0.7186 |
| 31012 | F06 | 12057 | 259232 | NALCN     | -0.1434 | 0.7188 |
| 11040 | C04 | 5026  | 84792  | C7orf70   | -0.1432 | 0.7191 |
| 31007 | A08 | 10875 | 23231  | SEL1L3    | -0.1430 | 0.7194 |
| 31024 | H07 | 13561 | 7681   | MKRN3     | -0.1427 | 0.7199 |
| 31009 | A10 | 11507 | 89848  | FCHSD1    | -0.1426 | 0.7201 |
| 51002 | H06 | 54882 | 399726 | C10orf114 | -0.1426 | 0.7201 |
| 31021 | F04 | 12963 | 85365  | ALG2      | -0.1425 | 0.7204 |
| 11079 | D01 | 1359  | 54878  | DPP8      | -0.1422 | 0.7208 |
| 11029 | F11 | 5018  | 10775  | POP4      | -0.1420 | 0.7211 |
| 11024 | D10 | 4818  | 2305   | FOXM1     | -0.1420 | 0.7212 |
| 11082 | G06 | 9365  | 5098   | PCDHGC3   | -0.1415 | 0.7220 |
| 11042 | H10 | 5671  | 51187  | RSL24D1   | -0.1414 | 0.7222 |
| 51002 | E10 | 54406 | 259236 | TMIE      | -0.1414 | 0.7222 |
| 11082 | B04 | 9066  | 51144  | HSD17B12  | -0.1412 | 0.7225 |
| 31042 | H02 | 6409  | 4922   | NTS       | -0.1410 | 0.7227 |
| 31007 | B04 | 11280 | 23023  | TMCC1     | -0.1408 | 0.7232 |
| 11037 | E01 | 8017  | 7922   | SLC39A7   | -0.1407 | 0.7233 |
| 11088 | E03 | 5165  | 23741  | EID1      | -0.1407 | 0.7233 |
| 31006 | E10 | 11262 | 6916   | TBXAS1    | -0.1405 | 0.7236 |
| 11078 | C04 | 1288  | 57626  | KLHL1     | -0.1405 | 0.7236 |
| 51013 | D06 | 53957 | 84735  | CNDP1     | -0.1404 | 0.7238 |
| 11024 | D06 | 3388  | 79009  | DDX50     | -0.1404 | 0.7238 |
| 11066 | H06 | 2023  | 3053   | SERPIND1  | -0.1403 | 0.7239 |

|       |     |       |        |          |         |        |
|-------|-----|-------|--------|----------|---------|--------|
| 11078 | C12 | 2035  | 257044 | C1orf101 | -0.1403 | 0.7240 |
| 31031 | H05 | 14633 | 81876  | RAB1B    | -0.1401 | 0.7243 |
| 31004 | E11 | 10980 | 10431  | LOC10431 | -0.1400 | 0.7245 |
| 11054 | A09 | 8136  | 5959   | RDH5     | -0.1398 | 0.7247 |
| 31024 | A03 | 13327 | 5669   | PSG1     | -0.1398 | 0.7247 |
| 31038 | G07 | 9216  | 64232  | MS4A5    | -0.1397 | 0.7249 |
| 31011 | E05 | 12306 | 1351   | COX8A    | -0.1394 | 0.7254 |
| 31031 | F03 | 14594 | 3558   | IL2      | -0.1394 | 0.7254 |
| 31009 | G04 | 11644 | 29780  | PARVB    | -0.1393 | 0.7256 |
| 11024 | E03 | 9322  | 11063  | SOX30    | -0.1389 | 0.7263 |
| 11024 | E09 | 10100 | 55250  | ELP2     | -0.1387 | 0.7265 |
| 31025 | D12 | 14077 | 63969  | C15orf49 | -0.1386 | 0.7268 |
| 31009 | C09 | 11751 | 2553   | GABPB1   | -0.1384 | 0.7271 |
| 51005 | H10 | 53964 | 4784   | NFIX     | -0.1384 | 0.7271 |
| 51009 | E09 | 53057 | 7100   | TLR5     | -0.1383 | 0.7272 |
| 11045 | B07 | 8898  | 25900  | IFFO1    | -0.1383 | 0.7273 |
| 11082 | A09 | 2054  | 150290 | DUSP18   | -0.1382 | 0.7274 |
| 11051 | C07 | 6047  | 116150 | NUS1     | -0.1382 | 0.7274 |
| 51012 | B01 | 55049 | 84439  | HHIPL1   | -0.1380 | 0.7278 |
| 11024 | A02 | 5036  | 55275  | VPS53    | -0.1379 | 0.7279 |
| 11081 | F09 | 9224  | 284123 | FAM27L   | -0.1377 | 0.7284 |
| 31007 | A07 | 11181 | 58499  | ZNF462   | -0.1375 | 0.7286 |
| 51035 | B10 | 54476 | 340562 | SATL1    | -0.1372 | 0.7290 |
| 31007 | E08 | 10880 | 170692 | ADAMTS18 | -0.1371 | 0.7292 |
| 11072 | G07 | 2327  | 80095  | ZNF606   | -0.1371 | 0.7294 |
| 11024 | C10 | 4722  | 56922  | MCCC1    | -0.1370 | 0.7295 |
| 31009 | C04 | 11788 | 83444  | INO80B   | -0.1370 | 0.7295 |
| 11061 | B11 | 1149  | 80723  | TMEM22   | -0.1369 | 0.7297 |
| 31015 | C07 | 12699 | 8490   | RGS5     | -0.1369 | 0.7297 |
| 31023 | F05 | 13401 | 55197  | RPRD1A   | -0.1368 | 0.7298 |
| 11038 | F01 | 6157  | 10133  | OPTN     | -0.1367 | 0.7299 |
| 11084 | G03 | 636   | 4909   | NTF4     | -0.1364 | 0.7305 |
| 51012 | A01 | 53925 | 10235  | RASGRP2  | -0.1363 | 0.7306 |
| 11049 | G04 | 9114  | 113510 | HELQ     | -0.1362 | 0.7309 |
| 11035 | G11 | 7463  | 5261   | PHKG2    | -0.1361 | 0.7310 |
| 51005 | A06 | 54299 | 85481  | PSKH2    | -0.1361 | 0.7310 |
| 31016 | D08 | 12409 | 90313  | TP53I13  | -0.1359 | 0.7313 |
| 11054 | G10 | 3299  | 81855  | SFXN3    | -0.1357 | 0.7316 |
| 51022 | E04 | 56282 | 9475   | ROCK2    | -0.1357 | 0.7317 |
| 11078 | D06 | 7306  | 79571  | GCC1     | -0.1354 | 0.7322 |
| 11083 | B01 | 605   | 2171   | FABP5    | -0.1353 | 0.7324 |
| 51009 | A05 | 54746 | 4920   | ROR2     | -0.1350 | 0.7328 |
| 31016 | G07 | 12824 | 57038  | RARS2    | -0.1349 | 0.7329 |
| 11037 | H07 | 5138  | 8394   | PIP5K1A  | -0.1349 | 0.7330 |

|       |     |       |        |          |         |        |
|-------|-----|-------|--------|----------|---------|--------|
| 11088 | F05 | 9727  | 6477   | SIAH1    | -0.1348 | 0.7332 |
| 11080 | A07 | 9794  | 5257   | PHKB     | -0.1346 | 0.7335 |
| 11061 | D06 | 659   | 3417   | IDH1     | -0.1346 | 0.7336 |
| 31009 | G02 | 11782 | 94081  | SFXN1    | -0.1345 | 0.7336 |
| 11030 | G10 | 9946  | 5179   | PENK     | -0.1344 | 0.7338 |
| 11046 | F05 | 7356  | 55353  | LAPTM4B  | -0.1344 | 0.7338 |
| 51026 | F12 | 53236 | 58504  | ARHGAP22 | -0.1343 | 0.7341 |
| 11020 | B09 | 5632  | 9077   | DIRAS3   | -0.1342 | 0.7341 |
| 11071 | D02 | 6623  | 7564   | ZNF16    | -0.1341 | 0.7343 |
| 31003 | H11 | 10468 | 1001   | CDH3     | -0.1341 | 0.7344 |
| 31025 | C04 | 13659 | 5787   | PTPRB    | -0.1340 | 0.7344 |
| 11003 | G07 | 8806  | 84193  | SETD3    | -0.1339 | 0.7347 |
| 11042 | C01 | 9083  | 80025  | PANK2    | -0.1338 | 0.7349 |
| 11020 | E07 | 7889  | NA     | NA       | -0.1337 | 0.7351 |
| 51013 | F08 | 54464 | 4033   | LRMP     | -0.1335 | 0.7354 |
| 11025 | F01 | 6681  | 6949   | TCOF1    | -0.1334 | 0.7354 |
| 11042 | C06 | 4764  | 8357   | HIST1H3H | -0.1333 | 0.7357 |
| 11026 | E10 | 9816  | 139728 | PNCK     | -0.1333 | 0.7358 |
| 51020 | E08 | 56446 | 390212 | GPR152   | -0.1332 | 0.7358 |
| 51028 | D04 | 56411 | 162967 | ZNF320   | -0.1332 | 0.7358 |
| 11039 | H09 | 1566  | 151050 | C2orf67  | -0.1332 | 0.7359 |
| 11071 | C11 | 2562  | 284565 | NBPF15   | -0.1332 | 0.7359 |
| 11058 | B12 | 4636  | 6895   | TARBP2   | -0.1331 | 0.7360 |
| 11005 | C10 | 534   | 5653   | KLK6     | -0.1330 | 0.7362 |
| 51009 | F03 | 52693 | 64084  | CLSTN2   | -0.1329 | 0.7363 |
| 11049 | D03 | 8742  | 6744   | SSFA2    | -0.1328 | 0.7366 |
| 11025 | F02 | 4257  | 9904   | RBM19    | -0.1327 | 0.7367 |
| 31005 | F05 | 11273 | 161753 | ODF3L1   | -0.1325 | 0.7371 |
| 11045 | B08 | 7207  | 55863  | TMEM126B | -0.1324 | 0.7372 |
| 11024 | C01 | 4563  | 823    | CAPN1    | -0.1323 | 0.7374 |
| 11080 | C07 | 8409  | 5159   | PDGFRB   | -0.1323 | 0.7375 |
| 31012 | E12 | 12272 | 10106  | CTDSP2   | -0.1322 | 0.7375 |
| 51034 | C07 | 53619 | 118424 | UBE2J2   | -0.1322 | 0.7375 |
| 11027 | G02 | 8837  | 55031  | USP47    | -0.1321 | 0.7378 |
| 11039 | D05 | 2344  | 122481 | AK7      | -0.1320 | 0.7378 |
| 31009 | D08 | 11639 | 6861   | SYT5     | -0.1319 | 0.7381 |
| 11020 | B01 | 5325  | 83591  | THAP2    | -0.1318 | 0.7383 |
| 31002 | A10 | 10795 | 285440 | CYP4V2   | -0.1317 | 0.7384 |
| 31003 | H06 | 10742 | 93550  | ANUBL1   | -0.1316 | 0.7386 |
| 31001 | C08 | 10273 | 28517  | TRDV2    | -0.1316 | 0.7386 |
| 11045 | C06 | 7266  | 55049  | C19orf60 | -0.1314 | 0.7389 |
| 11069 | G07 | 6448  | 8161   | COIL     | -0.1314 | 0.7390 |
| 11082 | A04 | 2181  | 4852   | NPY      | -0.1312 | 0.7393 |
| 31003 | C07 | 10411 | 153830 | RNF145   | -0.1311 | 0.7394 |

|       |     |       |        |           |         |        |
|-------|-----|-------|--------|-----------|---------|--------|
| 31022 | H02 | 13550 | 149466 | C1orf210  | -0.1311 | 0.7394 |
| 11019 | A12 | 5360  | 29928  | TIMM22    | -0.1310 | 0.7395 |
| 11078 | C06 | 7626  | 79798  | ARMC5     | -0.1309 | 0.7399 |
| 11069 | A10 | 6035  | 949    | SCARB1    | -0.1308 | 0.7400 |
| 11029 | H10 | 5024  | 51523  | CXXC5     | -0.1307 | 0.7401 |
| 51014 | F03 | 52939 | 1129   | CHRM2     | -0.1306 | 0.7403 |
| 11080 | B10 | 7283  | 9202   | ZMYM4     | -0.1304 | 0.7406 |
| 31019 | F09 | 12840 | 10799  | RPP40     | -0.1304 | 0.7407 |
| 51025 | B08 | 55363 | 23178  | PASK      | -0.1303 | 0.7408 |
| 51018 | B04 | 56571 | 126074 | C19orf39  | -0.1302 | 0.7409 |
| 11037 | A05 | 3454  | 887    | CCKBR     | -0.1297 | 0.7418 |
| 51020 | F05 | 55856 | 1296   | COL8A2    | -0.1296 | 0.7420 |
| 11029 | C08 | 5605  | 4801   | NFYB      | -0.1295 | 0.7422 |
| 11041 | D09 | 2274  | 11345  | GABARAPL2 | -0.1291 | 0.7428 |
| 11042 | B06 | 2739  | 51082  | POLR1D    | -0.1290 | 0.7430 |
| 31043 | A04 | 7883  | 84936  | ZFYVE19   | -0.1289 | 0.7432 |
| 11083 | F10 | 9199  | 5368   | PNOC      | -0.1289 | 0.7432 |
| 31042 | C01 | 4638  | 1477   | CSTF1     | -0.1288 | 0.7433 |
| 11028 | E02 | 8775  | 50801  | KCNK4     | -0.1288 | 0.7434 |
| 11038 | E12 | 5050  | 83732  | RIOK1     | -0.1287 | 0.7436 |
| 51025 | D12 | 53152 | 27436  | EML4      | -0.1286 | 0.7438 |
| 11087 | C03 | 2835  | 3382   | ICA1      | -0.1285 | 0.7438 |
| 51002 | B07 | 55272 | 728032 | MGC45713  | -0.1285 | 0.7438 |
| 51023 | F04 | 56260 | 65981  | CAPRIN2   | -0.1283 | 0.7442 |
| 31036 | D01 | 10927 | 54331  | GNG2      | -0.1282 | 0.7445 |
| 51018 | D04 | 56794 | 116379 | IL22RA2   | -0.1279 | 0.7449 |
| 51010 | E05 | 52673 | 56920  | SEMA3G    | -0.1277 | 0.7452 |
| 31041 | H08 | 3786  | 81605  | URM1      | -0.1276 | 0.7453 |
| 51028 | A12 | 53291 | 57509  | MTUS1     | -0.1274 | 0.7457 |
| 51013 | H03 | 53829 | 79847  | TMEM180   | -0.1274 | 0.7458 |
| 51015 | G05 | 52944 | 26212  | OR2B6     | -0.1273 | 0.7459 |
| 11075 | B08 | 5723  | 6440   | SFTPC     | -0.1273 | 0.7459 |
| 31025 | G09 | 14068 | 8366   | HIST1H4B  | -0.1273 | 0.7459 |
| 31045 | E08 | 7985  | 2953   | GSTT2     | -0.1271 | 0.7463 |
| 11080 | A10 | 2542  | 23262  | PIIP5K2   | -0.1270 | 0.7464 |
| 11020 | H01 | 5259  | 56902  | PNO1      | -0.1270 | 0.7464 |
| 11055 | G06 | 6287  | 5673   | PSG5      | -0.1270 | 0.7465 |
| 11041 | C09 | 8674  | 26751  | SH3YL1    | -0.1268 | 0.7469 |
| 31045 | G06 | 3264  | 79019  | CENPM     | -0.1267 | 0.7469 |
| 31002 | G07 | 10769 | 51435  | SCARA3    | -0.1267 | 0.7469 |
| 51028 | B08 | 56472 | 54802  | TRIT1     | -0.1266 | 0.7471 |
| 31013 | D04 | 12186 | 54432  | YIPF1     | -0.1266 | 0.7471 |
| 11038 | C05 | 3407  | 79065  | ATG9A     | -0.1266 | 0.7472 |
| 11083 | E06 | 812   | 26994  | RNF11     | -0.1264 | 0.7474 |

|       |     |       |        |           |         |        |
|-------|-----|-------|--------|-----------|---------|--------|
| 11083 | E10 | 9164  | 4924   | NUCB1     | -0.1264 | 0.7474 |
| 51023 | C04 | 56332 | 54801  | HAUS6     | -0.1264 | 0.7476 |
| 51029 | H06 | 55334 | 93109  | TMEM44    | -0.1263 | 0.7476 |
| 31027 | D06 | 13917 | 5062   | PAK2      | -0.1263 | 0.7476 |
| 51005 | D05 | 55022 | 387129 | NPSR1     | -0.1261 | 0.7481 |
| 11037 | C11 | 8089  | 26092  | TOR1AIP1  | -0.1260 | 0.7481 |
| 11009 | A06 | 5936  | 23761  | PISD      | -0.1260 | 0.7482 |
| 31010 | E10 | 11611 | 5885   | RAD21     | -0.1259 | 0.7483 |
| 11028 | D08 | 2983  | 865    | CBFB      | -0.1259 | 0.7484 |
| 31012 | A10 | 12286 | 10134  | BCAP31    | -0.1259 | 0.7484 |
| 11084 | H05 | 3605  | 2947   | GSTM3     | -0.1259 | 0.7484 |
| 11048 | B07 | 512   | 80011  | FAM192A   | -0.1258 | 0.7485 |
| 11042 | C08 | 7202  | 8355   | HIST1H3G  | -0.1257 | 0.7486 |
| 31001 | F01 | 10666 | 139341 | FUNDC1    | -0.1257 | 0.7487 |
| 11024 | C04 | 9635  | 1857   | DVL3      | -0.1257 | 0.7487 |
| 11025 | E07 | 5059  | 161    | AP2A2     | -0.1257 | 0.7487 |
| 11028 | E09 | 3632  | 27065  | D4S234E   | -0.1256 | 0.7488 |
| 11058 | G10 | 1932  | 23471  | TRAM1     | -0.1256 | 0.7488 |
| 31021 | F09 | 12975 | 1580   | CYP4B1    | -0.1256 | 0.7489 |
| 11024 | H01 | 8526  | 79958  | DENND1C   | -0.1254 | 0.7492 |
| 11045 | A07 | 4852  | 1412   | CRYBA2    | -0.1253 | 0.7494 |
| 31031 | F07 | 14620 | 3676   | ITGA4     | -0.1253 | 0.7494 |
| 51016 | G08 | 56612 | 353139 | LCE2A     | -0.1250 | 0.7499 |
| 51006 | C06 | 54819 | 148268 | ZNF570    | -0.1248 | 0.7502 |
| 31025 | F09 | 14010 | 2520   | GAST      | -0.1248 | 0.7502 |
| 51031 | A11 | 55265 | 259197 | NCR3      | -0.1247 | 0.7504 |
| 11072 | F11 | 1636  | 203102 | ADAM32    | -0.1246 | 0.7505 |
| 11059 | B05 | 8181  | 2820   | GPD2      | -0.1243 | 0.7510 |
| 11051 | F06 | 855   | 51116  | MRPS2     | -0.1243 | 0.7511 |
| 11062 | G10 | 1419  | 4642   | MYO1D     | -0.1242 | 0.7512 |
| 31023 | C05 | 13610 | 5306   | PITPNA    | -0.1242 | 0.7513 |
| 31032 | G11 | 14731 | 79736  | C17orf42  | -0.1242 | 0.7513 |
| 31009 | B02 | 11769 | 79805  | VASH2     | -0.1241 | 0.7514 |
| 11071 | C10 | 9475  | 151651 | EFHB      | -0.1240 | 0.7516 |
| 31025 | G05 | 13415 | 79631  | EFTUD1    | -0.1240 | 0.7517 |
| 31022 | H06 | 13344 | 494141 | LOC494141 | -0.1240 | 0.7517 |
| 31009 | A05 | 11541 | 5940   | RBMY1A1   | -0.1239 | 0.7517 |
| 51028 | D01 | 53379 | 90075  | ZNF30     | -0.1239 | 0.7519 |
| 51011 | B10 | 54490 | 7539   | ZFP37     | -0.1237 | 0.7521 |
| 31030 | E10 | 14423 | 10466  | COG5      | -0.1237 | 0.7522 |
| 51005 | F07 | 53519 | 8513   | LIPF      | -0.1237 | 0.7522 |
| 51009 | C06 | 54451 | 6294   | SAFB      | -0.1235 | 0.7524 |
| 11078 | F03 | 6158  | 7089   | TLE2      | -0.1235 | 0.7525 |
| 31005 | H04 | 11099 | 124936 | CYB5D2    | -0.1235 | 0.7525 |

|       |     |       |        |           |         |        |
|-------|-----|-------|--------|-----------|---------|--------|
| 11087 | H07 | 6066  | 79083  | MLPH      | -0.1234 | 0.7527 |
| 31033 | G02 | 14671 | 1725   | DHPS      | -0.1232 | 0.7531 |
| 11042 | C09 | 1000  | 80094  | FLJ14107  | -0.1232 | 0.7531 |
| 11080 | H05 | 2019  | 56142  | PCDHA6    | -0.1231 | 0.7532 |
| 11045 | D04 | 5778  | 4071   | TM4SF1    | -0.1231 | 0.7533 |
| 31006 | G06 | 11169 | 130162 | C2orf63   | -0.1229 | 0.7535 |
| 31006 | B06 | 10854 | 57707  | KIAA1609  | -0.1229 | 0.7536 |
| 11042 | H07 | 3484  | 808    | CALM3     | -0.1229 | 0.7536 |
| 11038 | G09 | 1983  | 23683  | PRKD3     | -0.1227 | 0.7538 |
| 11058 | H10 | 7370  | 115548 | FCHO2     | -0.1227 | 0.7539 |
| 11060 | G05 | 9257  | 118788 | PIK3AP1   | -0.1227 | 0.7539 |
| 31020 | F08 | 12855 | 902    | CCNH      | -0.1227 | 0.7540 |
| 11079 | H01 | 2148  | 55655  | NLRP2     | -0.1226 | 0.7540 |
| 51022 | D01 | 55853 | 2243   | FGA       | -0.1226 | 0.7541 |
| 11014 | C12 | 5862  | 3326   | HSP90AB1  | -0.1226 | 0.7541 |
| 31033 | A12 | 14909 | 7404   | UTY       | -0.1225 | 0.7542 |
| 11041 | E06 | 8635  | 10010  | TANK      | -0.1224 | 0.7544 |
| 31042 | C05 | 6714  | 79047  | KCTD15    | -0.1220 | 0.7551 |
| 31019 | B04 | 13111 | 27178  | IL1F7     | -0.1220 | 0.7551 |
| 31028 | F11 | 15066 | 55086  | CXorf57   | -0.1219 | 0.7553 |
| 11067 | E12 | 1624  | 6677   | SPAM1     | -0.1219 | 0.7553 |
| 11059 | B08 | 1240  | 3766   | KCNJ10    | -0.1217 | 0.7556 |
| 11025 | G03 | 2175  | 170506 | DHX36     | -0.1216 | 0.7557 |
| 11072 | C10 | 205   | 4594   | MUT       | -0.1216 | 0.7557 |
| 11080 | B12 | 2132  | 9631   | NUP155    | -0.1216 | 0.7558 |
| 11032 | G01 | 9108  | 10174  | SORBS3    | -0.1214 | 0.7561 |
| 11021 | F01 | 3781  | 4580   | MTX1      | -0.1209 | 0.7569 |
| 31002 | F02 | 10404 | 23787  | MTCH1     | -0.1209 | 0.7570 |
| 11020 | C04 | 7411  | 92421  | CHMP4C    | -0.1208 | 0.7571 |
| 51010 | D07 | 52685 | 51804  | SIX4      | -0.1207 | 0.7574 |
| 51017 | E11 | 56562 | 55916  | NXT2      | -0.1206 | 0.7575 |
| 31009 | G03 | 11795 | 84058  | WDR54     | -0.1204 | 0.7580 |
| 31038 | G04 | 14476 | 56923  | NMUR2     | -0.1202 | 0.7582 |
| 31038 | G05 | 14539 | 26123  | TCTN3     | -0.1201 | 0.7583 |
| 51029 | A03 | 55686 | 201191 | SAMD14    | -0.1201 | 0.7583 |
| 11041 | D10 | 1348  | 11345  | GABARAPL2 | -0.1200 | 0.7586 |
| 11049 | B01 | 5407  | 90407  | TMEM41A   | -0.1199 | 0.7588 |
| 11085 | C07 | 1503  | 79882  | ZC3H14    | -0.1198 | 0.7589 |
| 11047 | A09 | 8765  | 388677 | NOTCH2NL  | -0.1197 | 0.7590 |
| 11054 | B08 | 7490  | 9122   | SLC16A4   | -0.1196 | 0.7592 |
| 11058 | H09 | 8440  | 2331   | FMOD      | -0.1196 | 0.7594 |
| 11082 | A05 | 2733  | 9848   | MFAP3L    | -0.1195 | 0.7594 |
| 31025 | C03 | 13588 | 242    | ALOX12B   | -0.1195 | 0.7595 |
| 11021 | G07 | 3970  | 3163   | HMOX2     | -0.1195 | 0.7595 |

|       |     |       |        |           |         |        |
|-------|-----|-------|--------|-----------|---------|--------|
| 11083 | B05 | 5369  | 51264  | MRPL27    | -0.1194 | 0.7596 |
| 31030 | B05 | 14359 | 158584 | FAAH2     | -0.1194 | 0.7596 |
| 11030 | D11 | 4678  | 6194   | RPS6      | -0.1193 | 0.7597 |
| 51013 | H11 | 53131 | 64577  | ALDH8A1   | -0.1192 | 0.7600 |
| 11021 | A09 | 5135  | 8939   | FUBP3     | -0.1192 | 0.7600 |
| 51020 | A07 | 55818 | 2559   | GABRA6    | -0.1191 | 0.7602 |
| 11037 | C09 | 3979  | 4924   | NUCB1     | -0.1190 | 0.7603 |
| 11028 | A07 | 8773  | 7903   | ST8SIA4   | -0.1190 | 0.7604 |
| 31004 | A07 | 10914 | 402176 | RPL21P44  | -0.1189 | 0.7604 |
| 51009 | E05 | 54084 | 27154  | BRPF3     | -0.1189 | 0.7605 |
| 11036 | A03 | 2379  | 5166   | PDK4      | -0.1188 | 0.7607 |
| 11087 | H04 | 6825  | 1718   | DHCR24    | -0.1187 | 0.7609 |
| 11084 | E05 | 376   | 54749  | EPDR1     | -0.1186 | 0.7611 |
| 11079 | H02 | 5212  | 56949  | XAB2      | -0.1185 | 0.7612 |
| 51020 | F10 | 56022 | 5077   | PAX3      | -0.1185 | 0.7613 |
| 11083 | E04 | 129   | 119710 | C11orf74  | -0.1184 | 0.7614 |
| 11060 | H02 | 1323  | 196477 | C12orf12  | -0.1184 | 0.7614 |
| 11058 | C10 | 9081  | 114885 | OSBPL11   | -0.1184 | 0.7614 |
| 11035 | A06 | 1870  | 11103  | KRR1      | -0.1183 | 0.7615 |
| 31037 | A04 | 12520 | 65083  | NOL6      | -0.1183 | 0.7615 |
| 31005 | B05 | 11076 | 83593  | RASSF5    | -0.1183 | 0.7616 |
| 11039 | B03 | 8199  | 3320   | HSP90AA1  | -0.1182 | 0.7617 |
| 11038 | B10 | 3512  | 6301   | SARS      | -0.1182 | 0.7617 |
| 31036 | C07 | 11689 | 4338   | MOCS2     | -0.1182 | 0.7618 |
| 11029 | G11 | 7162  | 3216   | HOXB6     | -0.1180 | 0.7620 |
| 11057 | G02 | 4582  | 10614  | HEXIM1    | -0.1180 | 0.7621 |
| 11017 | F10 | 6355  | 5304   | PIP       | -0.1179 | 0.7623 |
| 31019 | G03 | 12870 | 84932  | RAB2B     | -0.1178 | 0.7624 |
| 11060 | H11 | 9739  | 4332   | MNDA      | -0.1177 | 0.7625 |
| 51012 | H10 | 54201 | 129881 | C2orf77   | -0.1173 | 0.7633 |
| 31001 | B04 | 10338 | 2879   | GPX4      | -0.1172 | 0.7634 |
| 11082 | G11 | 5856  | 8334   | HIST1H2AC | -0.1171 | 0.7637 |
| 11071 | C02 | 9864  | 55198  | APPL2     | -0.1170 | 0.7639 |
| 31024 | A09 | 13781 | 2873   | GPS1      | -0.1169 | 0.7640 |
| 31030 | C06 | 14272 | 10713  | USP39     | -0.1168 | 0.7642 |
| 11083 | D01 | 2394  | 6161   | RPL32     | -0.1168 | 0.7642 |
| 11066 | G08 | 4259  | 84260  | TCHP      | -0.1167 | 0.7643 |
| 31033 | A06 | 14989 | NA     | NA        | -0.1167 | 0.7644 |
| 51031 | F09 | 53367 | 84068  | SLC10A7   | -0.1166 | 0.7645 |
| 11024 | D02 | 9776  | 60312  | AFAP1     | -0.1165 | 0.7647 |
| 51014 | E11 | 53024 | 57115  | PGLYRP4   | -0.1164 | 0.7649 |
| 51014 | E06 | 52835 | 23547  | LILRA4    | -0.1164 | 0.7649 |
| 11048 | C05 | 8966  | 79443  | FYCO1     | -0.1164 | 0.7650 |
| 11070 | G02 | 6547  | 51132  | RLIM      | -0.1163 | 0.7650 |

|       |     |       |        |           |         |        |
|-------|-----|-------|--------|-----------|---------|--------|
| 11036 | D03 | 846   | 9962   | SLC23A2   | -0.1163 | 0.7651 |
| 11084 | D02 | 7502  | 51626  | DYNC2LI1  | -0.1163 | 0.7652 |
| 51029 | G05 | 55374 | 221074 | SLC39A12  | -0.1162 | 0.7653 |
| 31002 | E10 | 10677 | 3841   | KPNA5     | -0.1159 | 0.7657 |
| 51016 | B05 | 55738 | 337972 | KRTAP19-5 | -0.1159 | 0.7657 |
| 11058 | G01 | 2676  | 947    | CD34      | -0.1159 | 0.7658 |
| 31024 | G08 | 13558 | 6389   | SDHA      | -0.1159 | 0.7658 |
| 31017 | F04 | 12719 | NA     | NA        | -0.1159 | 0.7658 |
| 11038 | F03 | 5058  | 84795  | PYROXD2   | -0.1159 | 0.7659 |
| 31018 | G11 | 12920 | 6385   | SDC4      | -0.1158 | 0.7659 |
| 11079 | H04 | 9165  | 89797  | NAV2      | -0.1158 | 0.7659 |
| 11084 | B03 | 668   | 138050 | HGSNAT    | -0.1155 | 0.7665 |
| 11040 | B07 | 3679  | NA     | NA        | -0.1155 | 0.7665 |
| 11079 | E11 | 9616  | 8546   | AP3B1     | -0.1154 | 0.7667 |
| 11082 | A07 | 8687  | 126823 | KLHDC9    | -0.1154 | 0.7667 |
| 11026 | E07 | 96    | 219738 | C10orf35  | -0.1153 | 0.7668 |
| 51015 | A01 | 52871 | 10714  | POLD3     | -0.1152 | 0.7669 |
| 11080 | B03 | 3472  | 11187  | PKP3      | -0.1152 | 0.7669 |
| 11062 | G08 | 8063  | 5163   | PDK1      | -0.1151 | 0.7672 |
| 31001 | B08 | 10678 | 127733 | UBXN10    | -0.1151 | 0.7673 |
| 51028 | H08 | 55317 | 199692 | ZNF627    | -0.1150 | 0.7673 |
| 11024 | G06 | 9551  | 57795  | FAM5B     | -0.1150 | 0.7674 |
| 51016 | F05 | 56610 | 149685 | ADIG      | -0.1148 | 0.7676 |
| 11029 | E03 | 8360  | 64342  | HS1BP3    | -0.1148 | 0.7677 |
| 31040 | A06 | 10040 | 974    | CD79B     | -0.1148 | 0.7678 |
| 11059 | D01 | 1626  | 204219 | LASS3     | -0.1148 | 0.7678 |
| 31043 | E02 | 7630  | 356    | FASLG     | -0.1147 | 0.7678 |
| 11020 | E12 | 6110  | 54960  | GEMIN8    | -0.1147 | 0.7679 |
| 31017 | G04 | 13236 | 7369   | UMOD      | -0.1145 | 0.7682 |
| 11042 | B01 | 5032  | 84317  | CCDC115   | -0.1145 | 0.7683 |
| 11088 | H03 | 5227  | 85012  | TCEAL3    | -0.1144 | 0.7684 |
| 31010 | A02 | 11468 | 8550   | MAPKAPK5  | -0.1143 | 0.7686 |
| 51029 | A07 | 53253 | 445571 | CBWD3     | -0.1142 | 0.7687 |
| 11028 | E10 | 3161  | 9519   | TBPL1     | -0.1139 | 0.7693 |
| 11084 | G05 | 8862  | 79066  | METT10D   | -0.1139 | 0.7693 |
| 11088 | H10 | 2923  | 117248 | GALNTL2   | -0.1138 | 0.7695 |
| 11024 | F09 | 9523  | 151613 | TTC14     | -0.1137 | 0.7696 |
| 11041 | G11 | 7132  | 27109  | ATP5S     | -0.1136 | 0.7698 |
| 11029 | E09 | 506   | 9965   | FGF19     | -0.1136 | 0.7698 |
| 51006 | B06 | 53686 | 4248   | MGAT3     | -0.1136 | 0.7699 |
| 31011 | C08 | 12108 | 1622   | DBI       | -0.1134 | 0.7702 |
| 31031 | B02 | 14469 | 653391 | LOC653391 | -0.1134 | 0.7703 |
| 51026 | D12 | 55614 | 1982   | EIF4G2    | -0.1133 | 0.7703 |
| 31013 | A07 | 11867 | 112476 | PRRT2     | -0.1132 | 0.7705 |



|       |     |       |        |          |         |        |
|-------|-----|-------|--------|----------|---------|--------|
| 51027 | A11 | 55253 | 79968  | WDR76    | -0.1132 | 0.7705 |
| 11050 | B10 | 2731  | 79101  | TAF1D    | -0.1132 | 0.7705 |
| 11052 | B07 | 5984  | 6309   | SC5DL    | -0.1131 | 0.7708 |
| 11039 | E10 | 2093  | 150082 | LCA5L    | -0.1130 | 0.7708 |
| 11066 | E10 | 4118  | 6429   | SRSF4    | -0.1130 | 0.7709 |
| 51020 | F06 | 56015 | 644619 | INTS4L2  | -0.1130 | 0.7709 |
| 11035 | B02 | 3138  | 116138 | KLHDC3   | -0.1129 | 0.7710 |
| 31016 | B10 | 12655 | 60489  | APOBEC3G | -0.1128 | 0.7712 |
| 11032 | C12 | 2067  | 54956  | PARP16   | -0.1126 | 0.7715 |
| 51010 | E09 | 52828 | 57547  | ZNF624   | -0.1126 | 0.7716 |
| 11070 | E08 | 9560  | 23283  | CSTF2T   | -0.1125 | 0.7718 |
| 31033 | D06 | 14931 | 389756 | AQP7P2   | -0.1124 | 0.7719 |
| 11071 | B07 | 10214 | 9639   | ARHGEF10 | -0.1124 | 0.7720 |
| 11040 | C08 | 8644  | 84142  | FAM175A  | -0.1124 | 0.7720 |
| 11009 | F07 | 5825  | 64777  | RMND5B   | -0.1123 | 0.7721 |
| 11083 | G03 | 2794  | 3040   | HBA2     | -0.1121 | 0.7726 |
| 31036 | B08 | 12165 | 137835 | TMEM71   | -0.1120 | 0.7726 |
| 31032 | C11 | 14776 | 79674  | VEPH1    | -0.1120 | 0.7727 |
| 31038 | C02 | 14822 | 4246   | SCGB2A1  | -0.1118 | 0.7730 |
| 31005 | A12 | 10957 | 2564   | GABRE    | -0.1115 | 0.7735 |
| 11039 | D12 | 5321  | 8451   | CUL4A    | -0.1115 | 0.7736 |
| 11012 | H06 | 7069  | 6472   | SHMT2    | -0.1115 | 0.7736 |
| 11017 | H08 | 6997  | 7319   | UBE2A    | -0.1115 | 0.7736 |
| 31024 | F04 | 13596 | 5520   | PPP2R2A  | -0.1115 | 0.7736 |
| 11087 | H11 | 197   | 51317  | PHF21A   | -0.1114 | 0.7737 |
| 31027 | D05 | 14020 | 1562   | CYP2C18  | -0.1114 | 0.7737 |
| 31044 | E07 | 4751  | 1013   | CDH15    | -0.1114 | 0.7737 |
| 11029 | H01 | 8892  | 2571   | GAD1     | -0.1113 | 0.7739 |
| 11049 | B12 | 1436  | 135886 | WBSCR28  | -0.1113 | 0.7739 |
| 11049 | C07 | 5937  | 22943  | DKK1     | -0.1112 | 0.7741 |
| 31019 | B05 | 12956 | 9073   | CLDN8    | -0.1112 | 0.7741 |
| 11041 | F11 | 1681  | 256586 | LYSMD2   | -0.1112 | 0.7742 |
| 11082 | H11 | 5885  | 2537   | IFI6     | -0.1110 | 0.7745 |
| 31020 | F05 | 13249 | 9134   | CCNE2    | -0.1107 | 0.7749 |
| 31011 | B08 | 12140 | 124460 | SNX20    | -0.1107 | 0.7749 |
| 11079 | G09 | 9930  | 64072  | CDH23    | -0.1107 | 0.7750 |
| 31040 | H04 | 9266  | 254528 | C16orf73 | -0.1107 | 0.7750 |
| 51009 | G01 | 53115 | 4659   | PPP1R12A | -0.1107 | 0.7751 |
| 31043 | D05 | 6606  | 54328  | GPR173   | -0.1106 | 0.7753 |
| 11072 | C07 | 2273  | 6775   | STAT4    | -0.1106 | 0.7753 |
| 31027 | F02 | 14043 | 55855  | FAM45B   | -0.1105 | 0.7754 |
| 11048 | C07 | 34    | 7531   | YWHAE    | -0.1104 | 0.7755 |
| 51032 | E04 | 53360 | 414328 | C9orf103 | -0.1104 | 0.7755 |
| 31024 | C10 | 13481 | 29979  | UBQLN1   | -0.1104 | 0.7756 |

|       |     |       |        |          |         |        |
|-------|-----|-------|--------|----------|---------|--------|
| 11067 | H04 | 6559  | 7984   | ARHGEF5  | -0.1103 | 0.7757 |
| 11082 | F08 | 8088  | NA     | NA       | -0.1101 | 0.7760 |
| 11043 | F07 | 8866  | 54840  | APTX     | -0.1101 | 0.7761 |
| 31042 | B07 | 7084  | 51117  | COQ4     | -0.1101 | 0.7762 |
| 11035 | G10 | 1771  | 23588  | KLHDC2   | -0.1100 | 0.7762 |
| 11005 | A08 | 793   | 84876  | ORAI1    | -0.1099 | 0.7763 |
| 11072 | B11 | 8843  | 54906  | C10orf18 | -0.1099 | 0.7764 |
| 31002 | C12 | 10263 | 2262   | GPC5     | -0.1098 | 0.7766 |
| 11082 | H10 | 9489  | 348035 | MGC40069 | -0.1098 | 0.7766 |
| 31004 | F04 | 10282 | 7174   | TPP2     | -0.1097 | 0.7767 |
| 11020 | F10 | 9116  | 5970   | RELA     | -0.1095 | 0.7772 |
| 31014 | D12 | 12677 | NA     | NA       | -0.1094 | 0.7773 |
| 31027 | G05 | 13914 | 124359 | CDYL2    | -0.1094 | 0.7773 |
| 51006 | C04 | 55039 | 81786  | TRIM7    | -0.1094 | 0.7774 |
| 11020 | B11 | 9012  | 27252  | KLHL20   | -0.1093 | 0.7774 |
| 11083 | F05 | 911   | 79026  | AHNAK    | -0.1093 | 0.7775 |
| 11025 | C11 | 7239  | 5125   | PCSK5    | -0.1093 | 0.7775 |
| 11063 | H04 | 9735  | 57587  | KIAA1430 | -0.1093 | 0.7775 |
| 11040 | A09 | 4357  | 644903 | FLJ38668 | -0.1092 | 0.7778 |
| 31027 | E09 | 15035 | 5023   | P2RX1    | -0.1091 | 0.7779 |
| 11042 | F08 | 9118  | 6793   | STK10    | -0.1090 | 0.7781 |
| 51011 | A10 | 54883 | 1103   | CHAT     | -0.1089 | 0.7783 |
| 11005 | D05 | 2639  | 80328  | ULBP2    | -0.1088 | 0.7784 |
| 31032 | A02 | 14530 | 2048   | EPHB2    | -0.1087 | 0.7785 |
| 11072 | A10 | 3546  | 29889  | GNL2     | -0.1085 | 0.7789 |
| 31005 | H08 | 11130 | 55508  | SLC35E3  | -0.1085 | 0.7790 |
| 31013 | C09 | 12019 | 91526  | ANKRD44  | -0.1085 | 0.7790 |
| 11028 | D01 | 3585  | 51282  | SCAND1   | -0.1084 | 0.7791 |
| 31021 | H04 | 13182 | 7013   | TERF1    | -0.1084 | 0.7791 |
| 11038 | A09 | 3273  | 4145   | MATK     | -0.1083 | 0.7793 |
| 51016 | H01 | 53753 | 283948 | NHLRC4   | -0.1083 | 0.7794 |
| 11039 | E09 | 1442  | 2182   | ACSL4    | -0.1082 | 0.7794 |
| 11024 | G04 | 5358  | 5213   | PFKM     | -0.1081 | 0.7796 |
| 11047 | A05 | 7304  | 51015  | ISOC1    | -0.1081 | 0.7796 |
| 11032 | H11 | 8721  | 23244  | PDS5A    | -0.1080 | 0.7798 |
| 31011 | B04 | 11667 | 9719   | ADAMTSL2 | -0.1079 | 0.7800 |
| 11040 | B01 | 2469  | 3480   | IGFIR    | -0.1076 | 0.7805 |
| 31015 | H07 | 12453 | 140767 | NRSN1    | -0.1076 | 0.7805 |
| 31011 | C07 | 11899 | 57593  | EBF4     | -0.1074 | 0.7809 |
| 51020 | B09 | 55832 | 651    | BMP3     | -0.1074 | 0.7810 |
| 11042 | C05 | 4337  | 29108  | PYCARD   | -0.1072 | 0.7813 |
| 31027 | A05 | 13932 | 799    | CALCR    | -0.1071 | 0.7814 |
| 31017 | D01 | 12574 | 131583 | FAM43A   | -0.1071 | 0.7814 |
| 51026 | G11 | 55639 | 55030  | FBXO34   | -0.1070 | 0.7817 |

|       |     |       |        |           |         |        |
|-------|-----|-------|--------|-----------|---------|--------|
| 11049 | H07 | 186   | 55148  | UBR7      | -0.1067 | 0.7822 |
| 31025 | F10 | 14081 | 5816   | PVALB     | -0.1067 | 0.7822 |
| 31042 | B05 | 6688  | 92305  | TMEM129   | -0.1066 | 0.7823 |
| 11038 | D08 | 5034  | 80317  | ZKSCAN3   | -0.1066 | 0.7824 |
| 31002 | C04 | 10334 | 60680  | CELF5     | -0.1066 | 0.7824 |
| 31039 | G04 | 8664  | 9364   | RAB28     | -0.1065 | 0.7824 |
| 31021 | H01 | 13065 | 3426   | CFI       | -0.1065 | 0.7825 |
| 51002 | G02 | 52638 | 25874  | BRP44     | -0.1065 | 0.7825 |
| 51022 | C02 | 56809 | 284391 | ZNF844    | -0.1065 | 0.7826 |
| 11072 | E11 | 3769  | 9146   | HGS       | -0.1065 | 0.7826 |
| 51002 | E07 | 53794 | 339535 | LOC339535 | -0.1065 | 0.7826 |
| 11070 | C01 | 10157 | 126070 | ZNF440    | -0.1064 | 0.7826 |
| 11077 | F08 | 1879  | 151254 | ALS2CR11  | -0.1064 | 0.7828 |
| 11083 | B08 | 4868  | NA     | NA        | -0.1064 | 0.7828 |
| 11075 | E10 | 5799  | 6013   | RLN1      | -0.1063 | 0.7829 |
| 31036 | E11 | 12632 | 51006  | SLC35C2   | -0.1063 | 0.7829 |
| 11021 | G02 | 4698  | 9518   | GDF15     | -0.1062 | 0.7830 |
| 11078 | C07 | 5327  | 84219  | WDR24     | -0.1062 | 0.7831 |
| 11080 | E08 | 10181 | 3687   | ITGAX     | -0.1062 | 0.7831 |
| 11029 | E04 | 7474  | 10423  | CDIPT     | -0.1062 | 0.7831 |
| 11078 | G08 | 3726  | 4172   | MCM3      | -0.1062 | 0.7832 |
| 31013 | C11 | 12281 | 167227 | DCP2      | -0.1061 | 0.7832 |
| 11075 | A10 | 4047  | 79097  | TRIM48    | -0.1061 | 0.7833 |
| 51024 | G03 | 55159 | 25925  | ZNF521    | -0.1060 | 0.7835 |
| 11080 | F05 | 10163 | 5585   | PKN1      | -0.1059 | 0.7836 |
| 11038 | H07 | 9086  | 54882  | ANKHD1    | -0.1059 | 0.7836 |
| 11028 | B12 | 8689  | 55614  | KIF16B    | -0.1059 | 0.7837 |
| 31021 | H02 | 13054 | 10026  | PIGK      | -0.1059 | 0.7837 |
| 31010 | A04 | 11629 | 658    | BMPR1B    | -0.1059 | 0.7837 |
| 31024 | G07 | 13608 | 54542  | RC3H2     | -0.1058 | 0.7838 |
| 11072 | D01 | 2079  | 51224  | TCEB3B    | -0.1058 | 0.7838 |
| 11084 | A01 | 3559  | 970    | CD70      | -0.1058 | 0.7838 |
| 11075 | H03 | 815   | 5996   | RGS1      | -0.1057 | 0.7840 |
| 11058 | H11 | 9460  | 5029   | P2RY2     | -0.1056 | 0.7842 |
| 51009 | C05 | 54892 | 27152  | INTU      | -0.1054 | 0.7846 |
| 31042 | F06 | 9093  | 79864  | C11orf63  | -0.1053 | 0.7847 |
| 31031 | E12 | 14653 | 348174 | CLEC18A   | -0.1053 | 0.7848 |
| 51013 | B11 | 52822 | 163786 | SASS6     | -0.1052 | 0.7848 |
| 31042 | G04 | 6051  | 115827 | RAB3C     | -0.1052 | 0.7849 |
| 11026 | H06 | 8001  | 23484  | LEPROTL1  | -0.1052 | 0.7850 |
| 31024 | G09 | 13670 | 10855  | HPSE      | -0.1051 | 0.7851 |
| 31007 | D09 | 11535 | 493753 | C2orf64   | -0.1050 | 0.7852 |
| 11021 | D01 | 3429  | 3384   | ICAM2     | -0.1050 | 0.7853 |
| 51024 | H05 | 53607 | 54904  | WHSC1L1   | -0.1049 | 0.7853 |

|       |     |       |        |            |         |        |
|-------|-----|-------|--------|------------|---------|--------|
| 51008 | A11 | 56297 | 6453   | ITSN1      | -0.1049 | 0.7854 |
| 11040 | A11 | 6973  | 23367  | LARP1      | -0.1048 | 0.7855 |
| 11042 | F09 | 5491  | 51668  | HSPB11     | -0.1048 | 0.7856 |
| 51005 | G04 | 56768 | 285362 | SUMF1      | -0.1047 | 0.7857 |
| 11038 | H04 | 1275  | 55295  | KLHL26     | -0.1047 | 0.7857 |
| 51002 | D10 | 53091 | 9674   | KIAA0040   | -0.1047 | 0.7858 |
| 11072 | F04 | 3572  | 5371   | PML        | -0.1047 | 0.7858 |
| 11009 | E10 | 896   | 79042  | TSEN34     | -0.1047 | 0.7858 |
| 11082 | A06 | 8901  | 55890  | GPRC5C     | -0.1045 | 0.7862 |
| 31024 | B11 | 13757 | 3495   | IGHD       | -0.1044 | 0.7864 |
| 31009 | A11 | 11811 | 10316  | NMUR1      | -0.1044 | 0.7864 |
| 51017 | D06 | 56093 | 387628 | KGFLP1     | -0.1044 | 0.7864 |
| 31019 | H11 | 13073 | 83464  | APH1B      | -0.1044 | 0.7864 |
| 51028 | C06 | 53156 | 400720 | ZNF772     | -0.1043 | 0.7865 |
| 51006 | A09 | 53939 | 51362  | CDC40      | -0.1041 | 0.7869 |
| 11080 | C06 | 1881  | 56478  | EIF4ENIF1  | -0.1041 | 0.7869 |
| 11020 | H07 | 7619  | 1511   | CTSG       | -0.1041 | 0.7869 |
| 11017 | G06 | 7974  | 10267  | RAMP1      | -0.1040 | 0.7870 |
| 51008 | C05 | 56070 | 9923   | ZBTB40     | -0.1040 | 0.7870 |
| 11049 | A07 | 8712  | 163882 | CNST       | -0.1039 | 0.7873 |
| 51017 | G03 | 55752 | 8968   | HIST1H3F   | -0.1038 | 0.7873 |
| 11088 | D03 | 9006  | 5407   | PNLIPRP1   | -0.1038 | 0.7874 |
| 11060 | F03 | 2252  | 170261 | ZCCHC12    | -0.1037 | 0.7877 |
| 11078 | C08 | 1764  | 54536  | EXOC6      | -0.1036 | 0.7877 |
| 11029 | F07 | 5675  | 51510  | CHMP5      | -0.1036 | 0.7878 |
| 11037 | A06 | 3334  | 51763  | INPP5K     | -0.1035 | 0.7880 |
| 51014 | G05 | 52880 | 10050  | SLC17A4    | -0.1035 | 0.7880 |
| 31032 | C05 | 14524 | 55117  | SLC6A15    | -0.1034 | 0.7881 |
| 31041 | G10 | 4998  | 414062 | CCL3L3     | -0.1034 | 0.7882 |
| 11013 | F02 | 1866  | 153745 | FAM71B     | -0.1034 | 0.7882 |
| 31036 | H02 | 10374 | 8567   | MADD       | -0.1033 | 0.7882 |
| 11070 | F07 | 10039 | 55133  | SRBD1      | -0.1033 | 0.7883 |
| 31020 | C09 | 12988 | 50489  | CD207      | -0.1033 | 0.7883 |
| 51033 | D08 | 53640 | 632    | BGLAP      | -0.1033 | 0.7884 |
| 11026 | F08 | 9548  | 51022  | GLRX2      | -0.1032 | 0.7885 |
| 11057 | G03 | 5994  | 54187  | NANS       | -0.1032 | 0.7886 |
| 31025 | H11 | 14072 | 8968   | HIST1H3F   | -0.1031 | 0.7888 |
| 11089 | E03 | 2024  | 7179   | TPTE       | -0.1030 | 0.7888 |
| 11035 | C08 | 6834  | 4176   | MCM7       | -0.1030 | 0.7889 |
| 11040 | D04 | 865   | 56882  | CDC42SE1   | -0.1030 | 0.7889 |
| 51033 | C05 | 54305 | 149992 | ANKRD30BP2 | -0.1029 | 0.7891 |
| 51004 | G10 | 54417 | 4993   | OR2C1      | -0.1028 | 0.7891 |
| 11073 | B08 | 3840  | 54107  | POLE3      | -0.1028 | 0.7892 |
| 31002 | H09 | 10707 | 27039  | PKD2L2     | -0.1027 | 0.7893 |

|       |     |       |        |          |         |        |
|-------|-----|-------|--------|----------|---------|--------|
| 11084 | H10 | 4721  | 8635   | RNASET2  | -0.1027 | 0.7894 |
| 31012 | F10 | 11937 | 3958   | LGALS3   | -0.1027 | 0.7894 |
| 11080 | C08 | 1643  | 6522   | SLC4A2   | -0.1027 | 0.7895 |
| 11001 | A12 | 8627  | 55677  | IWS1     | -0.1026 | 0.7895 |
| 51006 | G11 | 55179 | 2591   | GALNT3   | -0.1026 | 0.7895 |
| 31024 | D12 | 13690 | 50512  | PODXL2   | -0.1025 | 0.7898 |
| 11080 | G07 | 2565  | 84464  | BTBD12   | -0.1024 | 0.7899 |
| 31026 | D01 | 13903 | 51471  | NAT8B    | -0.1024 | 0.7899 |
| 31033 | A01 | 14755 | 7109   | TRAPPC10 | -0.1024 | 0.7899 |
| 31031 | H04 | 14522 | 554235 | ASPDH    | -0.1024 | 0.7900 |
| 11036 | B06 | 7009  | 5176   | SERPINF1 | -0.1023 | 0.7900 |
| 11080 | C11 | 6848  | 26999  | CYFIP2   | -0.1022 | 0.7904 |
| 11089 | H02 | 996   | 8565   | YARS     | -0.1021 | 0.7906 |
| 11061 | H03 | 1154  | 64376  | IKZF5    | -0.1020 | 0.7906 |
| 31043 | H05 | 7390  | 55     | ACPP     | -0.1020 | 0.7906 |
| 11058 | D12 | 2334  | 9926   | LPGAT1   | -0.1020 | 0.7907 |
| 31012 | E04 | 12325 | 4155   | MBP      | -0.1019 | 0.7908 |
| 11062 | F09 | 2224  | 201456 | FBXO15   | -0.1019 | 0.7908 |
| 31003 | C03 | 10646 | 6940   | ZNF354A  | -0.1019 | 0.7908 |
| 31016 | H06 | 12607 | 55625  | ZDHHC7   | -0.1019 | 0.7908 |
| 11029 | B01 | 9708  | 55132  | LARP1B   | -0.1019 | 0.7908 |
| 11072 | E03 | 1999  | 55783  | FTSJD1   | -0.1019 | 0.7909 |
| 11038 | B04 | 5344  | 23061  | TBC1D9B  | -0.1018 | 0.7910 |
| 31020 | D05 | 13114 | 366    | AQP9     | -0.1017 | 0.7912 |
| 11088 | F06 | 2915  | 2687   | GGT5     | -0.1017 | 0.7912 |
| 31003 | F08 | 10607 | 167691 | LCA5     | -0.1016 | 0.7913 |
| 11064 | E01 | 1751  | 23012  | STK38L   | -0.1016 | 0.7915 |
| 51025 | B11 | 56851 | 54880  | BCOR     | -0.1014 | 0.7917 |
| 11030 | D07 | 6020  | 6194   | RPS6     | -0.1014 | 0.7918 |
| 31032 | F08 | 14788 | 203068 | TUBB     | -0.1013 | 0.7920 |
| 31027 | D10 | 14890 | 27120  | DKKL1    | -0.1013 | 0.7920 |
| 11020 | A11 | 3196  | 11018  | TMED1    | -0.1010 | 0.7926 |
| 11038 | C03 | 5434  | 56006  | C19orf61 | -0.1009 | 0.7926 |
| 51033 | F06 | 54557 | 2796   | GNRH1    | -0.1009 | 0.7926 |
| 51034 | B01 | 53809 | 3441   | IFNA4    | -0.1009 | 0.7926 |
| 11040 | E01 | 2052  | 84419  | C15orf48 | -0.1008 | 0.7928 |
| 31031 | H06 | 14660 | 121642 | ALKBH2   | -0.1008 | 0.7929 |
| 11005 | A07 | 528   | 63924  | CIDEC    | -0.1007 | 0.7930 |
| 11078 | B12 | 1379  | 222967 | RSPH10B  | -0.1007 | 0.7930 |
| 31022 | E11 | 13467 | 116138 | KLHDC3   | -0.1007 | 0.7931 |
| 51003 | B11 | 52644 | 9626   | GUCA1C   | -0.1006 | 0.7932 |
| 31031 | B04 | 14598 | 59067  | IL21     | -0.1006 | 0.7932 |
| 11009 | G03 | 3720  | 81628  | TSC22D4  | -0.1006 | 0.7932 |
| 31024 | C03 | 13698 | 51200  | CPA4     | -0.1005 | 0.7934 |

|       |     |       |           |           |         |        |
|-------|-----|-------|-----------|-----------|---------|--------|
| 31038 | D05 | 14665 | 1958      | EGR1      | -0.1004 | 0.7935 |
| 31003 | A06 | 10421 | 5073      | PARN      | -0.1004 | 0.7936 |
| 11029 | E06 | 1173  | 221143    | N6AMT2    | -0.1003 | 0.7937 |
| 11028 | F10 | 7378  | 10539     | GLRX3     | -0.1003 | 0.7938 |
| 31005 | C10 | 11217 | 79777     | ACBD4     | -0.1002 | 0.7939 |
| 31007 | H02 | 10890 | 6541      | SLC7A1    | -0.1002 | 0.7939 |
| 11064 | F04 | 1887  | 83473     | KATNAL2   | -0.1002 | 0.7940 |
| 11078 | G05 | 4937  | 84812     | PLCD4     | -0.1002 | 0.7940 |
| 51032 | F11 | 56616 | 353332    | KRTAP12-1 | -0.1001 | 0.7941 |
| 11083 | H01 | 8626  | 126961    | HIST2H3C  | -0.1001 | 0.7941 |
| 11021 | A04 | 5499  | 28973     | MRPS18B   | -0.1001 | 0.7941 |
| 31041 | D09 | 3976  | 10598     | AHSA1     | -0.1001 | 0.7941 |
| 31017 | E03 | 12514 | 9093      | DNAJA3    | -0.1001 | 0.7942 |
| 51026 | E12 | 56858 | 65986     | ZBTB10    | -0.1000 | 0.7944 |
| 11080 | E02 | 4854  | 2071      | ERCC3     | -0.1000 | 0.7944 |
| 11041 | D08 | 1446  | 4184      | SMCP      | -0.0999 | 0.7945 |
| 51006 | G06 | 55673 | 8785      | MATN4     | -0.0999 | 0.7946 |
| 31005 | G03 | 10939 | 201562    | PTPLB     | -0.0999 | 0.7946 |
| 31019 | G06 | 13098 | 64407     | RGS18     | -0.0997 | 0.7948 |
| 31002 | G04 | 10409 | 146540    | ZNF785    | -0.0996 | 0.7950 |
| 51016 | E12 | 56570 | 100287333 | FAM27E1   | -0.0996 | 0.7951 |
| 11088 | E10 | 991   | 9278      | ZBTB22    | -0.0996 | 0.7951 |
| 11041 | C04 | 4908  | 10290     | SPEG      | -0.0995 | 0.7953 |
| 51024 | E02 | 56063 | 50937     | CDON      | -0.0994 | 0.7954 |
| 11088 | B05 | 5620  | 4869      | NPM1      | -0.0994 | 0.7954 |
| 31019 | B12 | 13081 | 462       | SERPINC1  | -0.0994 | 0.7954 |
| 31025 | E04 | 13748 | 6667      | SP1       | -0.0993 | 0.7955 |
| 11052 | B02 | 1540  | 54585     | LZTFL1    | -0.0993 | 0.7956 |
| 31010 | G09 | 11411 | 10180     | RBM6      | -0.0993 | 0.7956 |
| 11088 | C12 | 2634  | 6049      | RNF6      | -0.0993 | 0.7956 |
| 31006 | F06 | 10958 | 283537    | SLC46A3   | -0.0992 | 0.7958 |
| 31004 | F02 | 10794 | 54778     | RNF111    | -0.0992 | 0.7958 |
| 11072 | D08 | 3332  | 7037      | TFRC      | -0.0992 | 0.7959 |
| 11039 | E01 | 7217  | 4931      | NVL       | -0.0991 | 0.7960 |
| 31005 | G07 | 10835 | 9766      | KIAA0247  | -0.0991 | 0.7960 |
| 31043 | G09 | 7847  | 824       | CAPN2     | -0.0990 | 0.7961 |
| 11079 | A09 | 9288  | 479       | ATP12A    | -0.0989 | 0.7963 |
| 11083 | G02 | 3187  | 25804     | LSM4      | -0.0989 | 0.7964 |
| 11020 | H08 | 5669  | 515       | ATP5F1    | -0.0989 | 0.7964 |
| 11089 | H03 | 9875  | 10864     | SLC22A7   | -0.0988 | 0.7965 |
| 31012 | E01 | 12356 | 91966     | CXorf40A  | -0.0988 | 0.7966 |
| 31023 | A03 | 13761 | 84940     | CORO6     | -0.0987 | 0.7967 |
| 11009 | H04 | 469   | 3628      | INPP1     | -0.0986 | 0.7970 |
| 51016 | H02 | 53865 | 9142      | CXorf1    | -0.0985 | 0.7971 |

|       |     |       |        |           |         |        |
|-------|-----|-------|--------|-----------|---------|--------|
| 11039 | E03 | 1509  | 121441 | NEDD1     | -0.0984 | 0.7972 |
| 11083 | C09 | 3114  | 8530   | CST7      | -0.0984 | 0.7972 |
| 11007 | B05 | 5110  | 9117   | SEC22C    | -0.0983 | 0.7975 |
| 31003 | G01 | 10714 | 9692   | KIAA0391  | -0.0982 | 0.7976 |
| 11029 | H02 | 6740  | 10430  | TMEM147   | -0.0982 | 0.7976 |
| 11083 | F07 | 9443  | 10867  | TSPAN9    | -0.0980 | 0.7979 |
| 51020 | C11 | 56394 | 6513   | SLC2A1    | -0.0980 | 0.7980 |
| 31031 | H09 | 14619 | 2781   | GNAZ      | -0.0980 | 0.7980 |
| 11082 | D07 | 6959  | NA     | NA        | -0.0978 | 0.7984 |
| 11035 | A04 | 1320  | 51533  | PHF7      | -0.0977 | 0.7985 |
| 11027 | G01 | 3113  | 64708  | COPS7B    | -0.0976 | 0.7987 |
| 31033 | B09 | 15006 | 54985  | HCFC1R1   | -0.0975 | 0.7989 |
| 11030 | A06 | 7514  | 50999  | TMED5     | -0.0975 | 0.7989 |
| 11066 | E12 | 7073  | 7266   | DNAJC7    | -0.0975 | 0.7989 |
| 51022 | A01 | 56637 | 6339   | SCNN1D    | -0.0975 | 0.7990 |
| 51018 | F04 | 55783 | 3211   | HOXB1     | -0.0974 | 0.7990 |
| 51023 | B02 | 55881 | 84515  | MCM8      | -0.0974 | 0.7991 |
| 31004 | G06 | 11043 | 51125  | GOLGA7    | -0.0974 | 0.7991 |
| 31007 | D01 | 11246 | 8633   | UNC5C     | -0.0974 | 0.7992 |
| 31012 | C04 | 12130 | 83988  | NCALD     | -0.0973 | 0.7993 |
| 51001 | A07 | 54171 | 149837 | LOC149837 | -0.0972 | 0.7994 |
| 51013 | E11 | 52696 | 53632  | PRKAG3    | -0.0972 | 0.7994 |
| 11087 | G05 | 4010  | 22888  | UBOX5     | -0.0972 | 0.7994 |
| 11041 | H09 | 4813  | 1329   | COX5B     | -0.0972 | 0.7994 |
| 31036 | H06 | 12162 | 55052  | MRPL20    | -0.0972 | 0.7995 |
| 51020 | G04 | 55801 | 6760   | SS18      | -0.0972 | 0.7995 |
| 11004 | D02 | 5750  | 84296  | GINS4     | -0.0972 | 0.7995 |
| 31024 | D04 | 13768 | 23304  | UBR2      | -0.0972 | 0.7995 |
| 11086 | G09 | 5000  | 54883  | CWC25     | -0.0971 | 0.7996 |
| 31024 | A04 | 13405 | 57418  | WDR18     | -0.0970 | 0.7998 |
| 51009 | C12 | 54189 | 2892   | GRIA3     | -0.0969 | 0.8000 |
| 31045 | E04 | 6900  | 55761  | TTC17     | -0.0969 | 0.8000 |
| 31004 | G07 | 11052 | 140606 | SELM      | -0.0969 | 0.8001 |
| 11040 | A07 | 4295  | 728039 | C21orf122 | -0.0968 | 0.8001 |
| 11021 | C09 | 3524  | 3386   | ICAM4     | -0.0968 | 0.8003 |
| 11032 | A03 | 7074  | 55186  | SLC25A36  | -0.0967 | 0.8003 |
| 31038 | A09 | 5921  | 115992 | RNF166    | -0.0967 | 0.8004 |
| 11088 | A09 | 1486  | 26074  | C20orf26  | -0.0966 | 0.8005 |
| 11064 | H05 | 4094  | 3855   | KRT7      | -0.0966 | 0.8006 |
| 31005 | F11 | 10872 | 27201  | GPR78     | -0.0966 | 0.8006 |
| 11025 | C09 | 2214  | 8450   | CUL4B     | -0.0965 | 0.8007 |
| 31005 | H02 | 10815 | 79847  | TMEM180   | -0.0965 | 0.8007 |
| 11050 | E03 | 4201  | 2705   | GJB1      | -0.0965 | 0.8007 |
| 11030 | A10 | 3364  | 79005  | SCNM1     | -0.0965 | 0.8008 |

|       |     |       |        |           |         |        |
|-------|-----|-------|--------|-----------|---------|--------|
| 11024 | E11 | 9763  | 5352   | PLOD2     | -0.0964 | 0.8010 |
| 51033 | E11 | 53544 | 284467 | FAM19A3   | -0.0964 | 0.8010 |
| 31045 | F08 | 3413  | 8572   | PDLIM4    | -0.0962 | 0.8014 |
| 11071 | A06 | 203   | 9933   | KIAA0020  | -0.0961 | 0.8014 |
| 31025 | G08 | 14061 | 1667   | DEFA1     | -0.0960 | 0.8016 |
| 11082 | H07 | 7927  | 79144  | PPDPF     | -0.0960 | 0.8016 |
| 11035 | C03 | 6282  | 8424   | BBOX1     | -0.0960 | 0.8016 |
| 31029 | G11 | 14447 | 339745 | SPOPL     | -0.0960 | 0.8017 |
| 51017 | E03 | 55751 | 8357   | HIST1H3H  | -0.0960 | 0.8018 |
| 11021 | B10 | 8954  | 2747   | GLUD2     | -0.0959 | 0.8018 |
| 11064 | H03 | 9752  | 55793  | FAM63A    | -0.0959 | 0.8019 |
| 11037 | B04 | 9303  | 956    | ENTPD3    | -0.0959 | 0.8019 |
| 11080 | E07 | 9694  | 23199  | KIAA0182  | -0.0959 | 0.8019 |
| 31017 | C07 | 12455 | 7466   | WFS1      | -0.0958 | 0.8021 |
| 51030 | B08 | 56540 | 64173  | SPATA1    | -0.0957 | 0.8022 |
| 31001 | E04 | 10490 | 10138  | YAF2      | -0.0957 | 0.8022 |
| 11005 | C09 | 9900  | 9069   | CLDN12    | -0.0956 | 0.8024 |
| 31036 | C12 | 12172 | 8605   | PLA2G4C   | -0.0955 | 0.8025 |
| 31021 | C10 | 13225 | 7364   | UGT2B7    | -0.0955 | 0.8026 |
| 31018 | A05 | 13302 | 2591   | GALNT3    | -0.0955 | 0.8026 |
| 31028 | A12 | 14212 | 5796   | PTPRK     | -0.0954 | 0.8027 |
| 31028 | B03 | 15027 | 8874   | ARHGEF7   | -0.0954 | 0.8027 |
| 31001 | H05 | 10786 | 8434   | RECK      | -0.0954 | 0.8028 |
| 11032 | E08 | 9863  | 128864 | C20orf144 | -0.0954 | 0.8029 |
| 31028 | B06 | 14134 | 11214  | AKAP13    | -0.0953 | 0.8029 |
| 11057 | H07 | 3036  | 3177   | SLC29A2   | -0.0953 | 0.8030 |
| 11056 | G02 | 4798  | 84080  | C16orf48  | -0.0953 | 0.8030 |
| 11028 | D03 | 318   | 51388  | NIP7      | -0.0952 | 0.8031 |
| 11040 | G06 | 5971  | 28978  | TMEM14A   | -0.0952 | 0.8032 |
| 11017 | A03 | 8621  | 27242  | TNFRSF21  | -0.0951 | 0.8033 |
| 11021 | E05 | 3628  | 2098   | ESD       | -0.0951 | 0.8033 |
| 31043 | F09 | 7229  | 22906  | TRAK1     | -0.0951 | 0.8033 |
| 11040 | E11 | 9106  | 79650  | C16orf57  | -0.0951 | 0.8034 |
| 31041 | G11 | 4382  | 10001  | MED6      | -0.0950 | 0.8034 |
| 11042 | H06 | 8180  | 810    | CALML3    | -0.0950 | 0.8034 |
| 31038 | B02 | 14709 | 64284  | RAB17     | -0.0950 | 0.8035 |
| 11040 | G09 | 5701  | 9341   | VAMP3     | -0.0950 | 0.8036 |
| 11015 | B07 | 9097  | 79701  | C17orf101 | -0.0950 | 0.8036 |
| 31042 | H01 | 3937  | 84286  | TMEM175   | -0.0949 | 0.8037 |
| 31002 | C10 | 10419 | 2710   | GK        | -0.0949 | 0.8037 |
| 11007 | F04 | 7161  | 54584  | GNB1L     | -0.0948 | 0.8039 |
| 11086 | B10 | 4832  | 6687   | SPG7      | -0.0948 | 0.8040 |
| 51003 | B06 | 52585 | 79676  | OGFOD2    | -0.0947 | 0.8041 |
| 11079 | B11 | 2395  | 9675   | TTI1      | -0.0947 | 0.8041 |



|       |     |       |        |          |         |        |
|-------|-----|-------|--------|----------|---------|--------|
| 31016 | H08 | 12663 | 5426   | POLE     | -0.0947 | 0.8041 |
| 51028 | A01 | 53275 | 27347  | STK39    | -0.0946 | 0.8043 |
| 51030 | C07 | 55672 | 161247 | FITM1    | -0.0945 | 0.8044 |
| 11024 | A07 | 3543  | 7045   | TGFBI    | -0.0945 | 0.8045 |
| 11061 | F08 | 5777  | 8372   | HYAL3    | -0.0945 | 0.8045 |
| 31014 | D10 | 12373 | 79175  | ZNF343   | -0.0945 | 0.8045 |
| 11028 | G09 | 8672  | 5998   | RGS3     | -0.0945 | 0.8045 |
| 11057 | C03 | 9997  | 11081  | KERA     | -0.0944 | 0.8047 |
| 11039 | B12 | 5225  | 8829   | NRP1     | -0.0944 | 0.8047 |
| 11029 | E11 | 2882  | 81551  | STMN4    | -0.0943 | 0.8048 |
| 11064 | H04 | 10139 | 221078 | NSUN6    | -0.0943 | 0.8048 |
| 11083 | A01 | 8389  | 4879   | NPPB     | -0.0943 | 0.8049 |
| 11022 | D07 | 7140  | 23466  | CBX6     | -0.0942 | 0.8050 |
| 11082 | G09 | 1002  | 201292 | TRIM65   | -0.0940 | 0.8054 |
| 31019 | B11 | 13238 | 53405  | CLIC5    | -0.0940 | 0.8054 |
| 11026 | G06 | 8604  | 57715  | SEMA4G   | -0.0940 | 0.8055 |
| 51018 | C10 | 55919 | 342667 | STAC2    | -0.0939 | 0.8055 |
| 51025 | A05 | 56876 | 30849  | PIK3R4   | -0.0939 | 0.8056 |
| 11066 | C12 | 2989  | 6788   | STK3     | -0.0939 | 0.8056 |
| 11084 | F07 | 6100  | 54732  | TMED9    | -0.0937 | 0.8058 |
| 51030 | B07 | 53226 | 819    | CAMLG    | -0.0937 | 0.8059 |
| 51003 | G06 | 52844 | 83954  | FKSG83   | -0.0937 | 0.8059 |
| 11058 | C08 | 2193  | 51201  | ZDHHC2   | -0.0937 | 0.8059 |
| 31032 | B10 | 14760 | 54993  | ZSCAN2   | -0.0937 | 0.8060 |
| 31016 | B09 | 12447 | 57121  | LPAR5    | -0.0937 | 0.8060 |
| 11018 | G06 | 7491  | 494143 | CHAC2    | -0.0937 | 0.8060 |
| 51001 | B06 | 52667 | 51352  | WT1AS    | -0.0937 | 0.8060 |
| 31027 | D04 | 14004 | 1142   | CHRN3    | -0.0934 | 0.8064 |
| 11061 | H11 | 5290  | 1104   | RCC1     | -0.0934 | 0.8064 |
| 31012 | C12 | 11920 | 375341 | C3orf62  | -0.0933 | 0.8067 |
| 11083 | G04 | 2861  | 55848  | C9orf46  | -0.0933 | 0.8067 |
| 31041 | E11 | 3831  | 529    | ATP6V1E1 | -0.0932 | 0.8068 |
| 51013 | E02 | 54133 | 55054  | ATG16L1  | -0.0932 | 0.8068 |
| 11087 | C12 | 6941  | 1299   | COL9A3   | -0.0932 | 0.8068 |
| 11038 | C11 | 5102  | 55214  | LEPREL1  | -0.0932 | 0.8069 |
| 31039 | F10 | 2986  | 498    | ATP5A1   | -0.0932 | 0.8069 |
| 31011 | C03 | 11824 | 54537  | FAM35A   | -0.0931 | 0.8071 |
| 11040 | D12 | 4754  | 84337  | ELOF1    | -0.0931 | 0.8071 |
| 11062 | H04 | 146   | 11240  | PADI2    | -0.0930 | 0.8073 |
| 31014 | B07 | 12328 | 151473 | SLC16A14 | -0.0929 | 0.8073 |
| 31006 | G08 | 10986 | 80185  | C8orf41  | -0.0929 | 0.8074 |
| 11054 | C10 | 2658  | 7730   | ZNF177   | -0.0929 | 0.8075 |
| 11024 | D01 | 4261  | 80760  | ITIH5    | -0.0929 | 0.8075 |
| 51031 | B03 | 53154 | 10934  | MORF4    | -0.0927 | 0.8077 |

|       |     |       |        |          |         |        |
|-------|-----|-------|--------|----------|---------|--------|
| 11020 | E02 | 5146  | 2596   | GAP43    | -0.0927 | 0.8077 |
| 31028 | E03 | 14747 | 267004 | PGBD3    | -0.0927 | 0.8078 |
| 51010 | A12 | 53114 | 25777  | SUN2     | -0.0927 | 0.8079 |
| 11084 | D04 | 4848  | NA     | NA       | -0.0927 | 0.8079 |
| 11086 | C01 | 575   | 175    | AGA      | -0.0926 | 0.8079 |
| 31014 | F06 | 12379 | 151056 | PLB1     | -0.0926 | 0.8080 |
| 51010 | F05 | 54489 | 6670   | SP3      | -0.0925 | 0.8082 |
| 51018 | B07 | 55784 | 135152 | B3GAT2   | -0.0925 | 0.8082 |
| 11061 | A07 | 2975  | 64798  | DEPDC6   | -0.0924 | 0.8083 |
| 31037 | A03 | 12541 | 6293   | VPS52    | -0.0924 | 0.8083 |
| 31007 | A12 | 11796 | 387036 | GUSBL1   | -0.0924 | 0.8084 |
| 51033 | A05 | 54667 | 337879 | KRTAP8-1 | -0.0923 | 0.8085 |
| 31035 | H01 | 14968 | 23288  | IQCE     | -0.0923 | 0.8085 |
| 51020 | E03 | 56012 | 353174 | ZACN     | -0.0922 | 0.8087 |
| 11048 | A02 | 6213  | 51616  | TAF9B    | -0.0922 | 0.8088 |
| 11006 | A01 | 8649  | 90806  | ANGEL2   | -0.0922 | 0.8088 |
| 31028 | A11 | 15060 | 57698  | KIAA1598 | -0.0921 | 0.8088 |
| 31042 | A07 | 6572  | 26262  | TSPAN17  | -0.0921 | 0.8089 |
| 11079 | D12 | 1971  | 118491 | TTC18    | -0.0921 | 0.8090 |
| 31021 | C04 | 13262 | 221476 | PI16     | -0.0920 | 0.8091 |
| 11014 | A10 | 2892  | 10634  | GAS2L1   | -0.0920 | 0.8092 |
| 51013 | C05 | 54561 | 4067   | LYN      | -0.0919 | 0.8092 |
| 31041 | G07 | 6182  | 408050 | NOMO3    | -0.0919 | 0.8093 |
| 31019 | E08 | 13047 | 146456 | TMED6    | -0.0919 | 0.8093 |
| 11079 | G05 | 8071  | 63827  | BCAN     | -0.0919 | 0.8093 |
| 11072 | H11 | 3440  | 56146  | PCDHA2   | -0.0919 | 0.8093 |
| 31032 | C04 | 14558 | 168400 | DDX53    | -0.0919 | 0.8093 |
| 31001 | C04 | 10656 | 200728 | TMEM17   | -0.0918 | 0.8094 |
| 51003 | E08 | 53432 | 339231 | ARL16    | -0.0918 | 0.8095 |
| 31013 | A12 | 11910 | 7752   | ZNF200   | -0.0918 | 0.8095 |
| 31028 | A05 | 14108 | 27300  | ZNF544   | -0.0918 | 0.8095 |
| 11020 | E03 | 7718  | 10544  | PROCR    | -0.0918 | 0.8095 |
| 31037 | F12 | 14139 | 26166  | RGS22    | -0.0917 | 0.8096 |
| 51024 | A09 | 55210 | 1105   | CHD1     | -0.0915 | 0.8100 |
| 51029 | G06 | 56631 | 56956  | LHX9     | -0.0914 | 0.8102 |
| 11030 | D04 | 8307  | 3002   | GZMB     | -0.0914 | 0.8102 |
| 11082 | E10 | 9374  | 121273 | C12orf54 | -0.0914 | 0.8102 |
| 11086 | B02 | 4887  | 1459   | CSNK2A2  | -0.0913 | 0.8103 |
| 11035 | E10 | 1895  | 55466  | DNAJA4   | -0.0913 | 0.8104 |
| 11039 | B05 | 7572  | 78999  | LRFN4    | -0.0913 | 0.8104 |
| 11088 | G06 | 3021  | 10569  | SLU7     | -0.0913 | 0.8104 |
| 11044 | B06 | 1426  | 57092  | PCNP     | -0.0912 | 0.8106 |
| 31007 | F12 | 11420 | 254263 | CNIH2    | -0.0912 | 0.8106 |
| 51031 | H05 | 55595 | 54876  | DCAF16   | -0.0912 | 0.8106 |

|       |     |       |        |           |         |        |
|-------|-----|-------|--------|-----------|---------|--------|
| 31009 | A01 | 11512 | 375346 | TMEM110   | -0.0911 | 0.8108 |
| 31028 | B02 | 15042 | 204474 | PDILT     | -0.0910 | 0.8109 |
| 31037 | D10 | 15028 | 160897 | GPR180    | -0.0909 | 0.8111 |
| 11040 | F01 | 859   | 92070  | C4orf42   | -0.0909 | 0.8111 |
| 31036 | C10 | 11825 | 4209   | MEF2D     | -0.0909 | 0.8111 |
| 11045 | D06 | 294   | 9929   | JOSD1     | -0.0909 | 0.8111 |
| 11038 | C12 | 5917  | 50512  | PODXL2    | -0.0909 | 0.8112 |
| 31010 | G05 | 11345 | 54620  | FBXL19    | -0.0909 | 0.8112 |
| 51009 | A01 | 53058 | 56204  | KIAA1370  | -0.0909 | 0.8112 |
| 51012 | G05 | 54383 | 269    | AMHR2     | -0.0909 | 0.8112 |
| 11059 | D12 | 1826  | 9577   | BRE       | -0.0908 | 0.8113 |
| 11009 | F10 | 3758  | 3421   | IDH3G     | -0.0908 | 0.8114 |
| 11024 | A11 | 4129  | 6891   | TAP2      | -0.0907 | 0.8115 |
| 11078 | C10 | 1730  | 2009   | EML1      | -0.0907 | 0.8115 |
| 31015 | C02 | 12471 | 81563  | C1orf21   | -0.0907 | 0.8115 |
| 51016 | H09 | 55996 | 339788 | LOC339788 | -0.0907 | 0.8115 |
| 31005 | A06 | 11208 | 1053   | CEBPE     | -0.0906 | 0.8116 |
| 31031 | F12 | 14480 | 84975  | MFSD5     | -0.0905 | 0.8118 |
| 11058 | D11 | 1441  | 54329  | GPR85     | -0.0905 | 0.8119 |
| 11083 | E03 | 9375  | 152065 | C3orf22   | -0.0905 | 0.8119 |
| 31023 | F03 | 13371 | 284992 | CCDC150   | -0.0905 | 0.8119 |
| 11075 | E06 | 4863  | 6533   | SLC6A6    | -0.0905 | 0.8120 |
| 31013 | C08 | 12177 | 27125  | AFF4      | -0.0904 | 0.8121 |
| 31002 | E05 | 10388 | 85453  | TSPYL5    | -0.0903 | 0.8123 |
| 11043 | G02 | 8316  | 5534   | PPP3R1    | -0.0902 | 0.8124 |
| 11071 | B01 | 2384  | 10928  | RALBP1    | -0.0902 | 0.8125 |
| 11021 | C01 | 5613  | 335    | APOA1     | -0.0902 | 0.8125 |
| 11013 | G02 | 3914  | 9055   | PRC1      | -0.0901 | 0.8126 |
| 51029 | D02 | 56917 | 340706 | VWA2      | -0.0901 | 0.8126 |
| 11013 | A05 | 5479  | 279    | AMY2A     | -0.0901 | 0.8126 |
| 11079 | A10 | 9540  | 22983  | MAST1     | -0.0901 | 0.8126 |
| 51013 | C06 | 54899 | 220963 | SLC16A9   | -0.0900 | 0.8128 |
| 11075 | G08 | 4575  | 5504   | PPP1R2    | -0.0900 | 0.8128 |
| 11036 | F07 | 3523  | 23623  | RUSC1     | -0.0900 | 0.8128 |
| 11005 | B08 | 2911  | 79903  | NAT15     | -0.0899 | 0.8130 |
| 11009 | E06 | 2936  | 1117   | CHI3L2    | -0.0899 | 0.8130 |
| 51014 | D04 | 52974 | 146050 | ZSCAN29   | -0.0899 | 0.8131 |
| 11058 | B11 | 4335  | 3107   | HLA-C     | -0.0897 | 0.8134 |
| 11005 | G05 | 8321  | 8431   | NR0B2     | -0.0897 | 0.8134 |
| 31020 | C03 | 13174 | 132851 | SPATA4    | -0.0896 | 0.8135 |
| 11049 | G11 | 3074  | 84329  | HVCN1     | -0.0896 | 0.8136 |
| 11041 | E04 | 2575  | 83640  | FAM103A1  | -0.0895 | 0.8138 |
| 31005 | B11 | 11093 | 157807 | CLVS1     | -0.0895 | 0.8138 |
| 51025 | B05 | 56932 | 3791   | KDR       | -0.0894 | 0.8139 |

|       |     |       |           |              |         |        |
|-------|-----|-------|-----------|--------------|---------|--------|
| 31023 | E02 | 13532 | 3535      | IGL@         | -0.0894 | 0.8140 |
| 31043 | A08 | 6593  | 84946     | LTV1         | -0.0894 | 0.8140 |
| 31043 | A07 | 7653  | 1910      | EDNRB        | -0.0894 | 0.8140 |
| 11083 | D04 | 8031  | 51806     | CALML5       | -0.0893 | 0.8141 |
| 11013 | A06 | 799   | 26959     | HBP1         | -0.0893 | 0.8142 |
| 31017 | F05 | 13078 | 4719      | NDUFS1       | -0.0892 | 0.8144 |
| 11082 | D10 | 8801  | 79693     | YRDC         | -0.0890 | 0.8147 |
| 11013 | F07 | 6113  | 84858     | ZNF503       | -0.0890 | 0.8147 |
| 11046 | D08 | 4414  | 2939      | GSTA2        | -0.0890 | 0.8147 |
| 51033 | A07 | 54102 | 200261    | LOC200261    | -0.0889 | 0.8148 |
| 11058 | H02 | 4750  | 11321     | GPN1         | -0.0889 | 0.8149 |
| 11020 | D11 | 7512  | 127018    | LYPLAL1      | -0.0889 | 0.8149 |
| 51029 | H05 | 55484 | 283298    | OLFML1       | -0.0888 | 0.8150 |
| 51008 | G02 | 54109 | 9860      | LRIG2        | -0.0888 | 0.8150 |
| 31009 | F02 | 11489 | 84885     | ZDHHC12      | -0.0888 | 0.8151 |
| 11079 | A03 | 7296  | 8842      | PROM1        | -0.0888 | 0.8151 |
| 51002 | F10 | 53748 | 340094    | LOC340094    | -0.0886 | 0.8154 |
| 11082 | E08 | 6061  | 90871     | C9orf123     | -0.0886 | 0.8155 |
| 31021 | C01 | 13146 | 9134      | CCNE2        | -0.0886 | 0.8155 |
| 11036 | D01 | 9414  | 54507     | ADAMTSL4     | -0.0886 | 0.8155 |
| 51028 | E05 | 53255 | 124961    | ZFP3         | -0.0885 | 0.8156 |
| 51033 | B12 | 54525 | 100132147 | LOC100132147 | -0.0882 | 0.8161 |
| 31039 | E05 | 2823  | 4828      | NMB          | -0.0882 | 0.8163 |
| 11038 | A04 | 9404  | 79934     | ADCK4        | -0.0882 | 0.8163 |
| 31004 | H09 | 11141 | 138429    | PIP5KL1      | -0.0880 | 0.8165 |
| 31032 | B03 | 14525 | 405754    | ERVRDE1      | -0.0880 | 0.8167 |
| 11039 | A10 | 2219  | 23708     | GSPT2        | -0.0879 | 0.8168 |
| 31017 | F09 | 13084 | 10301     | DLEU1        | -0.0879 | 0.8169 |
| 11024 | A06 | 3292  | 9129      | PRPF3        | -0.0879 | 0.8169 |
| 11017 | C11 | 6646  | 79622     | SNRNP25      | -0.0878 | 0.8170 |
| 31025 | H08 | 14074 | 147199    | SCGB1C1      | -0.0878 | 0.8170 |
| 11074 | C04 | 5445  | 11097     | NUPL2        | -0.0877 | 0.8171 |
| 51011 | G07 | 54959 | 81626     | C1orf14      | -0.0877 | 0.8171 |
| 51011 | C08 | 52906 | 125893    | ZNF816       | -0.0877 | 0.8171 |
| 31033 | H09 | 14903 | 80012     | PHC3         | -0.0877 | 0.8172 |
| 51004 | C12 | 54300 | 139760    | GPR119       | -0.0877 | 0.8172 |
| 11072 | D07 | 7833  | 57464     | FAM40B       | -0.0876 | 0.8173 |
| 11021 | C10 | 5911  | 6430      | SRSF5        | -0.0876 | 0.8173 |
| 11024 | D04 | 10153 | 4047      | LSS          | -0.0875 | 0.8176 |
| 11049 | B08 | 2950  | 28970     | C11orf54     | -0.0874 | 0.8176 |
| 31017 | G03 | 12716 | 4953      | ODC1         | -0.0874 | 0.8177 |
| 51022 | H10 | 56062 | 9208      | LRRFIP1      | -0.0874 | 0.8177 |
| 51010 | A05 | 52767 | 147741    | ZNF560       | -0.0873 | 0.8178 |
| 31023 | D03 | 13655 | 121457    | IKBIP        | -0.0873 | 0.8179 |

|       |     |       |           |           |         |        |
|-------|-----|-------|-----------|-----------|---------|--------|
| 31017 | D05 | 12439 | 10730     | YME1L1    | -0.0872 | 0.8181 |
| 11029 | D12 | 3198  | 51550     | CINP      | -0.0871 | 0.8183 |
| 11051 | F03 | 6963  | 57048     | PLSCR3    | -0.0871 | 0.8183 |
| 11024 | B08 | 5003  | 81570     | CLPB      | -0.0871 | 0.8184 |
| 31036 | E08 | 11395 | 79823     | C2orf34   | -0.0871 | 0.8184 |
| 31031 | H11 | 14482 | 10010     | TANK      | -0.0870 | 0.8185 |
| 11078 | D05 | 6685  | 11100     | HNRNPUL1  | -0.0870 | 0.8185 |
| 11036 | H01 | 9397  | 23245     | ASTN2     | -0.0870 | 0.8185 |
| 11049 | A08 | 3792  | 84727     | SPSB2     | -0.0870 | 0.8185 |
| 51014 | E04 | 52861 | 2158      | F9        | -0.0869 | 0.8187 |
| 11038 | E07 | 8969  | 89796     | NAV1      | -0.0868 | 0.8188 |
| 11063 | A12 | 9457  | 60682     | SMAP1     | -0.0868 | 0.8188 |
| 31028 | H08 | 15051 | 284723    | SLC25A34  | -0.0867 | 0.8190 |
| 11042 | D05 | 8585  | 84901     | NFATC2IP  | -0.0867 | 0.8190 |
| 31002 | C03 | 10611 | 57135     | DAZ4      | -0.0867 | 0.8190 |
| 31016 | C04 | 12494 | 64422     | ATG3      | -0.0866 | 0.8191 |
| 11006 | B04 | 9173  | 117289    | TAGAP     | -0.0866 | 0.8193 |
| 51009 | A06 | 54135 | 146212    | KCTD19    | -0.0865 | 0.8194 |
| 31029 | G02 | 14294 | 112937    | GLB1L3    | -0.0864 | 0.8195 |
| 11037 | D02 | 3146  | 1917      | EEF1A2    | -0.0864 | 0.8196 |
| 51027 | G05 | 55406 | 256646    | C15orf55  | -0.0864 | 0.8196 |
| 11003 | E04 | 5293  | 85004     | RERG      | -0.0864 | 0.8196 |
| 31006 | A02 | 11112 | 1510      | CTSE      | -0.0864 | 0.8196 |
| 11088 | D07 | 59    | 55659     | ZNF416    | -0.0862 | 0.8200 |
| 31007 | D03 | 11102 | 6338      | SCNN1B    | -0.0861 | 0.8201 |
| 11025 | G01 | 1491  | 55124     | PIWIL2    | -0.0861 | 0.8201 |
| 31035 | E02 | 14956 | 5394      | EXOSC10   | -0.0860 | 0.8203 |
| 11084 | H08 | 8939  | 4665      | NAB2      | -0.0860 | 0.8203 |
| 11039 | G04 | 7690  | 80020     | FOXRED2   | -0.0860 | 0.8204 |
| 51011 | B12 | 54338 | 7743      | ZNF189    | -0.0859 | 0.8205 |
| 51001 | G01 | 55281 | 5937      | RBMS1     | -0.0859 | 0.8205 |
| 51015 | F04 | 52926 | 203197    | C9orf91   | -0.0858 | 0.8207 |
| 11044 | F05 | 5044  | 84279     | C2orf7    | -0.0858 | 0.8208 |
| 31001 | E02 | 10267 | 9450      | LY86      | -0.0857 | 0.8209 |
| 11024 | E02 | 9378  | 284001    | CCDC57    | -0.0857 | 0.8210 |
| 31016 | D04 | 12694 | 100137047 | JMJD7     | -0.0856 | 0.8210 |
| 11042 | E11 | 7027  | 4627      | MYH9      | -0.0856 | 0.8212 |
| 31021 | E08 | 12936 | 11136     | SLC7A9    | -0.0856 | 0.8212 |
| 11072 | B07 | 6244  | 3954      | LETM1     | -0.0855 | 0.8212 |
| 31005 | B09 | 10998 | 441242    | LOC441242 | -0.0855 | 0.8213 |
| 51012 | G03 | 54059 | 5596      | MAPK4     | -0.0854 | 0.8214 |
| 51009 | C10 | 52966 | 84631     | SLITRK2   | -0.0854 | 0.8215 |
| 11003 | A09 | 9906  | 8477      | GPR65     | -0.0853 | 0.8216 |
| 51033 | D03 | 55669 | NA        | NA        | -0.0853 | 0.8216 |

|       |     |       |        |           |         |        |
|-------|-----|-------|--------|-----------|---------|--------|
| 31029 | G09 | 14422 | 124149 | ANKRD26P1 | -0.0853 | 0.8217 |
| 11025 | D03 | 4948  | 2137   | EXTL3     | -0.0853 | 0.8217 |
| 31035 | E01 | 15005 | 11129  | SFRS16    | -0.0853 | 0.8217 |
| 11080 | F09 | 8232  | 9765   | ZFYVE16   | -0.0853 | 0.8217 |
| 11024 | C12 | 9985  | 29904  | EEF2K     | -0.0853 | 0.8218 |
| 11081 | G07 | 8098  | 84068  | SLC10A7   | -0.0852 | 0.8218 |
| 11060 | A05 | 9888  | 6751   | SSTR1     | -0.0852 | 0.8218 |
| 31030 | B03 | 14331 | 55177  | FAM82A2   | -0.0852 | 0.8219 |
| 11003 | H05 | 8992  | 64689  | GORASP1   | -0.0852 | 0.8219 |
| 31012 | A03 | 12226 | 84449  | ZNF333    | -0.0851 | 0.8220 |
| 11085 | F05 | 224   | 6187   | RPS2      | -0.0851 | 0.8220 |
| 11084 | G09 | 8900  | 23338  | PHF15     | -0.0851 | 0.8220 |
| 51003 | C06 | 53473 | 117286 | CIB3      | -0.0851 | 0.8221 |
| 51002 | H04 | 52757 | 283687 | C15orf37  | -0.0851 | 0.8221 |
| 11086 | H02 | 7269  | 112849 | C14orf149 | -0.0849 | 0.8223 |
| 11022 | C07 | 7775  | 80851  | SH3BP5L   | -0.0849 | 0.8224 |
| 11061 | G08 | 8106  | 7424   | VEGFC     | -0.0849 | 0.8224 |
| 11005 | G06 | 10242 | 11267  | SNF8      | -0.0849 | 0.8224 |
| 11082 | C04 | 5526  | 4695   | NDUFA2    | -0.0849 | 0.8224 |
| 11049 | C11 | 6053  | 23551  | RASD2     | -0.0849 | 0.8225 |
| 11030 | H03 | 7389  | 11330  | CTRC      | -0.0848 | 0.8226 |
| 31011 | C04 | 11589 | 124245 | ZC3H18    | -0.0848 | 0.8227 |
| 51011 | B07 | 53813 | 6542   | SLC7A2    | -0.0847 | 0.8228 |
| 51020 | F09 | 56030 | 440561 | PRAMEF6   | -0.0847 | 0.8228 |
| 11038 | B11 | 4953  | 8532   | CPZ       | -0.0845 | 0.8232 |
| 11030 | E03 | 3661  | 1534   | CYB561    | -0.0845 | 0.8232 |
| 31024 | F02 | 13776 | 5194   | PEX13     | -0.0845 | 0.8232 |
| 11066 | H07 | 6929  | 54681  | P4HTM     | -0.0844 | 0.8233 |
| 51029 | F07 | 56424 | 389114 | ZNF662    | -0.0844 | 0.8233 |
| 11083 | F09 | 655   | 7178   | TPT1      | -0.0844 | 0.8233 |
| 51035 | C02 | 55116 | 6504   | SLAMF1    | -0.0844 | 0.8233 |
| 31002 | G02 | 10279 | 8916   | HERC3     | -0.0844 | 0.8234 |
| 31029 | A01 | 14427 | 2029   | ENSA      | -0.0844 | 0.8234 |
| 31022 | D08 | 13484 | 84064  | HDHD2     | -0.0844 | 0.8235 |
| 31027 | E08 | 14672 | 80740  | LY6G6C    | -0.0843 | 0.8235 |
| 11005 | B09 | 3056  | 51074  | APIP      | -0.0843 | 0.8235 |
| 31032 | B05 | 14477 | 57462  | KIAA1161  | -0.0843 | 0.8236 |
| 11072 | H09 | 1438  | 23507  | LRRC8B    | -0.0843 | 0.8237 |
| 31042 | B04 | 8974  | 84063  | KIRREL2   | -0.0842 | 0.8237 |
| 11040 | H07 | 7810  | 8363   | HIST1H4J  | -0.0842 | 0.8238 |
| 31033 | E11 | 14873 | NA     | NA        | -0.0842 | 0.8238 |
| 51026 | E11 | 53162 | 9112   | MTA1      | -0.0842 | 0.8238 |
| 31009 | A02 | 11609 | 11104  | KATNA1    | -0.0842 | 0.8238 |
| 31022 | E06 | 13640 | NA     | NA        | -0.0841 | 0.8239 |

|       |     |       |           |           |         |        |
|-------|-----|-------|-----------|-----------|---------|--------|
| 31027 | H05 | 13948 | 83550     | GPR101    | -0.0841 | 0.8239 |
| 31041 | D02 | 7662  | 7507      | XPA       | -0.0841 | 0.8240 |
| 31029 | F10 | 14310 | 81562     | LMAN2L    | -0.0841 | 0.8240 |
| 11082 | B02 | 1590  | 6168      | RPL37A    | -0.0841 | 0.8240 |
| 51020 | F08 | 56609 | 65109     | UPF3B     | -0.0841 | 0.8240 |
| 31013 | G08 | 12210 | 55293     | UEVLD     | -0.0840 | 0.8241 |
| 11005 | A03 | 747   | 22934     | RPIA      | -0.0840 | 0.8241 |
| 11070 | C05 | 8493  | 55813     | UTP6      | -0.0840 | 0.8242 |
| 11032 | E05 | 6716  | 55701     | FLJ10357  | -0.0839 | 0.8243 |
| 11021 | E12 | 7456  | 23564     | DDAH2     | -0.0839 | 0.8243 |
| 11041 | A02 | 1015  | 122509    | IFI27L1   | -0.0839 | 0.8244 |
| 11007 | G02 | 3258  | 1512      | CTSH      | -0.0838 | 0.8245 |
| 51006 | A01 | 53667 | 7547      | ZIC3      | -0.0838 | 0.8246 |
| 31022 | E05 | 13337 | 57151     | LYZL6     | -0.0838 | 0.8246 |
| 31031 | G05 | 14649 | 3149      | HMGB3     | -0.0837 | 0.8247 |
| 11084 | F02 | 8632  | 11129     | SFRS16    | -0.0837 | 0.8247 |
| 51020 | B11 | 56414 | 5625      | PRODH     | -0.0837 | 0.8248 |
| 31045 | A01 | 686   | 64760     | FAM160B2  | -0.0836 | 0.8249 |
| 11072 | C11 | 8172  | 7738      | ZNF184    | -0.0836 | 0.8250 |
| 51020 | E10 | 56582 | 208       | AKT2      | -0.0835 | 0.8251 |
| 11020 | C10 | 7399  | 160287    | LDHAL6A   | -0.0835 | 0.8252 |
| 11075 | H01 | 1168  | 158471    | PRUNE2    | -0.0834 | 0.8252 |
| 31041 | H10 | 5112  | 84326     | C16orf13  | -0.0834 | 0.8252 |
| 31037 | F11 | 15052 | 2177      | FANCD2    | -0.0834 | 0.8253 |
| 11015 | D10 | 5449  | 1678      | TIMM8A    | -0.0833 | 0.8254 |
| 11029 | B10 | 2782  | 22846     | VASH1     | -0.0833 | 0.8255 |
| 31002 | F09 | 10701 | 133308    | NHEDC2    | -0.0833 | 0.8255 |
| 31010 | B10 | 11570 | 26146     | TRAF3IP1  | -0.0833 | 0.8255 |
| 11040 | H09 | 1459  | 100133171 | SPANXB2   | -0.0833 | 0.8255 |
| 11083 | A05 | 737   | 8721      | EDF1      | -0.0832 | 0.8256 |
| 11039 | E11 | 7299  | 201255    | LRRC45    | -0.0832 | 0.8257 |
| 51006 | E07 | 55560 | 57452     | GALNTL1   | -0.0832 | 0.8257 |
| 11028 | E05 | 6891  | 51659     | GINS2     | -0.0831 | 0.8259 |
| 31002 | H04 | 10716 | 1974      | EIF4A2    | -0.0831 | 0.8259 |
| 31013 | F12 | 12076 | 148156    | ZNF558    | -0.0830 | 0.8260 |
| 11021 | F04 | 3182  | 6723      | SRM       | -0.0830 | 0.8260 |
| 31007 | H09 | 11371 | 140738    | TMEM37    | -0.0830 | 0.8261 |
| 11061 | D09 | 9247  | 153643    | FAM81B    | -0.0830 | 0.8261 |
| 11007 | B04 | 7416  | 65008     | MRPL1     | -0.0829 | 0.8263 |
| 11054 | D11 | 946   | 8560      | DEGS1     | -0.0828 | 0.8263 |
| 31005 | E11 | 10937 | 153657    | TTC23L    | -0.0827 | 0.8265 |
| 11042 | H05 | 1080  | 79026     | AHNAK     | -0.0827 | 0.8266 |
| 11028 | A04 | 3009  | 8341      | HIST1H2BN | -0.0827 | 0.8266 |
| 11039 | G05 | 5510  | 7047      | TGM4      | -0.0827 | 0.8267 |

|       |     |       |        |           |         |        |
|-------|-----|-------|--------|-----------|---------|--------|
| 31005 | D12 | 11301 | 10552  | ARPC1A    | -0.0827 | 0.8267 |
| 11064 | D04 | 4558  | 5914   | RARA      | -0.0826 | 0.8268 |
| 51008 | A06 | 53535 | 25962  | KIAA1429  | -0.0826 | 0.8269 |
| 11036 | C07 | 3526  | 51253  | MRPL37    | -0.0825 | 0.8269 |
| 51030 | G07 | 53278 | 165257 | C1QL2     | -0.0825 | 0.8270 |
| 11021 | G08 | 4046  | 6017   | RLBP1     | -0.0825 | 0.8270 |
| 31041 | E10 | 5022  | 144453 | BEST3     | -0.0824 | 0.8272 |
| 11048 | B05 | 472   | 117177 | RAB3IP    | -0.0824 | 0.8273 |
| 31041 | F12 | 4130  | 25807  | RHBDD3    | -0.0824 | 0.8273 |
| 11012 | E07 | 2708  | 9776   | ATG13     | -0.0823 | 0.8274 |
| 31011 | D04 | 11425 | 50485  | SMARCAL1  | -0.0823 | 0.8274 |
| 11037 | H09 | 8462  | 18     | ABAT      | -0.0823 | 0.8274 |
| 11061 | G09 | 4869  | 54821  | ERCC6L    | -0.0822 | 0.8275 |
| 11039 | G09 | 1325  | 9498   | SLC4A8    | -0.0821 | 0.8277 |
| 51031 | F04 | 55656 | 81792  | ADAMTS12  | -0.0821 | 0.8277 |
| 11042 | G01 | 1284  | 5805   | PTS       | -0.0820 | 0.8279 |
| 11009 | H07 | 393   | 11326  | VSIG4     | -0.0820 | 0.8279 |
| 11026 | E04 | 8073  | 79856  | SNX22     | -0.0820 | 0.8280 |
| 11052 | C11 | 786   | 6341   | SCO1      | -0.0820 | 0.8280 |
| 11024 | H09 | 10095 | 22871  | NLGN1     | -0.0819 | 0.8281 |
| 51028 | F12 | 56461 | 64106  | NPFPR1    | -0.0818 | 0.8283 |
| 51004 | B02 | 53029 | 283897 | C16orf54  | -0.0817 | 0.8285 |
| 31022 | F04 | 13312 | 339487 | ZBTB8OS   | -0.0817 | 0.8286 |
| 11003 | E06 | 5405  | 260294 | NSUN5P2   | -0.0817 | 0.8286 |
| 11009 | H01 | 3448  | 6376   | CX3CL1    | -0.0816 | 0.8288 |
| 11046 | H09 | 6486  | 9709   | HERPUD1   | -0.0815 | 0.8289 |
| 31002 | D04 | 10408 | 254122 | SNX32     | -0.0815 | 0.8290 |
| 11061 | D02 | 9372  | 220047 | CCDC83    | -0.0814 | 0.8290 |
| 11024 | B09 | 8497  | 25791  | NGEF      | -0.0814 | 0.8291 |
| 11042 | G07 | 6404  | 5304   | PIP       | -0.0814 | 0.8291 |
| 11016 | H08 | 5543  | 6288   | SAA1      | -0.0813 | 0.8293 |
| 51001 | D07 | 54866 | 389541 | C7orf59   | -0.0813 | 0.8293 |
| 11038 | B08 | 6200  | 56606  | SLC2A9    | -0.0812 | 0.8294 |
| 11026 | E12 | 479   | 51082  | POLR1D    | -0.0812 | 0.8295 |
| 11020 | D12 | 7890  | NA     | NA        | -0.0812 | 0.8295 |
| 11016 | C06 | 8867  | 6125   | RPL5      | -0.0811 | 0.8297 |
| 51033 | A12 | 55099 | 440446 | FLJ42842  | -0.0810 | 0.8298 |
| 11020 | C05 | 5201  | 7083   | TK1       | -0.0809 | 0.8300 |
| 31042 | D01 | 4343  | 274    | BIN1      | -0.0809 | 0.8300 |
| 31022 | C04 | 13356 | 127845 | GOLT1A    | -0.0809 | 0.8300 |
| 31040 | G10 | 1945  | 9738   | CP110     | -0.0809 | 0.8300 |
| 51015 | B05 | 53126 | 26532  | OR10H3    | -0.0809 | 0.8301 |
| 51001 | B08 | 55057 | 149934 | C20orf191 | -0.0808 | 0.8301 |
| 51010 | G06 | 54469 | 89876  | C3orf15   | -0.0808 | 0.8301 |



|       |     |       |        |           |         |        |
|-------|-----|-------|--------|-----------|---------|--------|
| 11025 | E06 | 1980  | 4438   | MSH4      | -0.0808 | 0.8302 |
| 11083 | F02 | 2138  | 2543   | GAGE1     | -0.0808 | 0.8302 |
| 11008 | C12 | 6027  | 2771   | GNAI2     | -0.0808 | 0.8303 |
| 11016 | G11 | 6117  | 91860  | CALML4    | -0.0808 | 0.8303 |
| 11088 | E05 | 10053 | 8743   | TNFSF10   | -0.0807 | 0.8303 |
| 51013 | H04 | 54868 | 1758   | DMP1      | -0.0807 | 0.8304 |
| 11009 | A07 | 402   | 929    | CD14      | -0.0807 | 0.8304 |
| 31001 | D09 | 10257 | 26298  | EHF       | -0.0806 | 0.8307 |
| 31045 | E06 | 8478  | 440556 | FLJ42875  | -0.0806 | 0.8307 |
| 31031 | D09 | 14621 | 65258  | MPPE1     | -0.0806 | 0.8307 |
| 31040 | H09 | 9617  | 79974  | C7orf58   | -0.0805 | 0.8307 |
| 51012 | A03 | 54409 | 54502  | RBM47     | -0.0805 | 0.8308 |
| 11082 | D04 | 8782  | NA     | NA        | -0.0805 | 0.8309 |
| 31044 | H08 | 10078 | 9820   | CUL7      | -0.0804 | 0.8309 |
| 11020 | E09 | 5727  | 55973  | BCAP29    | -0.0804 | 0.8309 |
| 31002 | G10 | 10744 | 79739  | TTL7      | -0.0804 | 0.8311 |
| 11078 | A09 | 6172  | 7594   | ZNF43     | -0.0804 | 0.8311 |
| 11017 | D08 | 3687  | 516    | ATP5G1    | -0.0803 | 0.8311 |
| 11086 | A05 | 6394  | 72     | ACTG2     | -0.0803 | 0.8311 |
| 51029 | E07 | 55327 | 199953 | TMEM201   | -0.0803 | 0.8311 |
| 51015 | G10 | 52751 | 2259   | FGF14     | -0.0803 | 0.8312 |
| 51012 | E07 | 53531 | 8632   | DNAH17    | -0.0802 | 0.8313 |
| 11066 | G04 | 5030  | 83440  | ADPGK     | -0.0802 | 0.8314 |
| 11009 | C07 | 2775  | 11098  | PRSS23    | -0.0802 | 0.8314 |
| 31025 | H05 | 13650 | 2034   | EPAS1     | -0.0802 | 0.8314 |
| 31002 | B06 | 10288 | 5026   | P2RX5     | -0.0801 | 0.8315 |
| 11078 | F08 | 388   | 10607  | TBL3      | -0.0801 | 0.8316 |
| 51015 | G09 | 52898 | 135250 | RAET1E    | -0.0800 | 0.8317 |
| 31015 | G02 | 12814 | 57698  | KIAA1598  | -0.0800 | 0.8317 |
| 11037 | D03 | 3516  | 54758  | KLHDC4    | -0.0800 | 0.8318 |
| 51033 | A10 | 53718 | 9081   | PRY       | -0.0799 | 0.8319 |
| 11009 | B06 | 4463  | 81502  | HM13      | -0.0799 | 0.8319 |
| 11071 | A04 | 9357  | 1737   | DLAT      | -0.0799 | 0.8319 |
| 31044 | C01 | 5128  | 152217 | LOC152217 | -0.0799 | 0.8320 |
| 51005 | B12 | 52958 | 65094  | JMJD4     | -0.0798 | 0.8321 |
| 51030 | B04 | 55650 | 58489  | FAM108C1  | -0.0798 | 0.8321 |
| 51035 | C11 | 54008 | 90649  | ZNF486    | -0.0798 | 0.8321 |
| 11070 | F11 | 6209  | 10232  | MSLN      | -0.0798 | 0.8322 |
| 51031 | E10 | 53354 | 388649 | C1orf146  | -0.0797 | 0.8323 |
| 11049 | E02 | 87    | 53836  | GPR87     | -0.0796 | 0.8325 |
| 51021 | C04 | 56203 | 92822  | ZNF276    | -0.0796 | 0.8325 |
| 31042 | F05 | 6121  | 924    | CD7       | -0.0796 | 0.8326 |
| 51017 | G06 | 55822 | 1044   | CDX1      | -0.0795 | 0.8326 |
| 31031 | G01 | 14455 | 146057 | TTBK2     | -0.0795 | 0.8326 |

|       |     |       |        |           |         |        |
|-------|-----|-------|--------|-----------|---------|--------|
| 11066 | E08 | 9525  | 23533  | PIK3R5    | -0.0794 | 0.8328 |
| 11016 | F07 | 5811  | 154791 | C7orf55   | -0.0794 | 0.8329 |
| 11025 | F06 | 9924  | 22795  | NID2      | -0.0794 | 0.8329 |
| 11048 | C06 | 9125  | 4719   | NDUFS1    | -0.0793 | 0.8331 |
| 11066 | H05 | 3076  | 22827  | PUF60     | -0.0793 | 0.8332 |
| 11040 | H04 | 8481  | 147991 | DPY19L3   | -0.0793 | 0.8332 |
| 31043 | E05 | 6634  | 64789  | DEM1      | -0.0792 | 0.8332 |
| 11049 | A09 | 4173  | 79169  | C1orf35   | -0.0792 | 0.8334 |
| 31008 | H06 | 11336 | 341032 | C11orf53  | -0.0791 | 0.8334 |
| 11059 | F06 | 6956  | 55224  | ETNK2     | -0.0791 | 0.8335 |
| 11024 | B03 | 4532  | 9289   | GPR56     | -0.0791 | 0.8335 |
| 11017 | H01 | 9152  | 5612   | PRKRIR    | -0.0791 | 0.8336 |
| 11042 | D10 | 1147  | 5217   | PFN2      | -0.0790 | 0.8336 |
| 11089 | G04 | 2753  | 26007  | DAK       | -0.0790 | 0.8337 |
| 51015 | F07 | 52878 | 333929 | SNAI3     | -0.0789 | 0.8339 |
| 51025 | A12 | 53341 | 5586   | PKN2      | -0.0789 | 0.8339 |
| 11043 | B03 | 7092  | 339047 | LOC339047 | -0.0789 | 0.8339 |
| 31034 | F06 | 14901 | 27197  | GPR82     | -0.0789 | 0.8339 |
| 11026 | F09 | 1501  | 128229 | C1orf182  | -0.0788 | 0.8341 |
| 11007 | B11 | 9921  | 149473 | CCDC24    | -0.0788 | 0.8341 |
| 31001 | H08 | 10754 | 55268  | ECHDC2    | -0.0788 | 0.8341 |
| 31044 | F07 | 10093 | 2648   | KAT2A     | -0.0788 | 0.8342 |
| 11080 | H04 | 4142  | 51347  | TAOK3     | -0.0787 | 0.8342 |
| 51011 | D03 | 53124 | 1763   | DNA2      | -0.0787 | 0.8342 |
| 51006 | B02 | 55533 | 5296   | PIK3R2    | -0.0787 | 0.8342 |
| 11037 | H10 | 9413  | 22807  | IKZF2     | -0.0787 | 0.8343 |
| 51014 | A10 | 52804 | 285231 | FBXW12    | -0.0786 | 0.8344 |
| 11041 | D03 | 8034  | 8099   | CDK2AP1   | -0.0786 | 0.8344 |
| 31002 | H05 | 10650 | 57162  | PELI1     | -0.0786 | 0.8344 |
| 11014 | E01 | 3011  | 4779   | NFE2L1    | -0.0786 | 0.8345 |
| 11086 | B08 | 1248  | 115399 | LRRC56    | -0.0785 | 0.8346 |
| 11064 | E11 | 3782  | 4086   | SMAD1     | -0.0785 | 0.8346 |
| 11006 | B05 | 8047  | 127534 | GJB4      | -0.0785 | 0.8346 |
| 31023 | E09 | 13487 | NA     | NA        | -0.0785 | 0.8346 |
| 51014 | H08 | 52937 | 286827 | TRIM59    | -0.0785 | 0.8347 |
| 31038 | H06 | 14614 | 27133  | KCNH5     | -0.0785 | 0.8347 |
| 11024 | A04 | 3579  | 23645  | PPP1R15A  | -0.0785 | 0.8347 |
| 31030 | D12 | 14243 | 3980   | LIG3      | -0.0784 | 0.8348 |
| 31039 | B05 | 3104  | 50486  | G0S2      | -0.0784 | 0.8348 |
| 51028 | D10 | 53339 | 3188   | HNRNPH2   | -0.0784 | 0.8348 |
| 11078 | E06 | 7587  | 2908   | NR3C1     | -0.0784 | 0.8349 |
| 11065 | A07 | 1557  | 6782   | HSPA13    | -0.0784 | 0.8349 |
| 11012 | C12 | 2966  | 5129   | CDK18     | -0.0783 | 0.8349 |
| 51023 | C02 | 55735 | 51111  | SUV420H1  | -0.0783 | 0.8351 |

|       |     |       |        |          |         |        |
|-------|-----|-------|--------|----------|---------|--------|
| 11059 | B06 | 9936  | 8705   | B3GALT4  | -0.0782 | 0.8352 |
| 31034 | H04 | 14902 | 57730  | ANKRD36B | -0.0781 | 0.8354 |
| 11030 | H02 | 7102  | 155435 | RBM33    | -0.0781 | 0.8354 |
| 51013 | H08 | 55074 | 3990   | LIPC     | -0.0780 | 0.8356 |
| 11025 | F09 | 6004  | 115752 | DIS3L    | -0.0779 | 0.8358 |
| 31005 | G05 | 11094 | 3300   | DNAJB2   | -0.0779 | 0.8359 |
| 11063 | B04 | 1274  | 4974   | OMG      | -0.0778 | 0.8360 |
| 11055 | C12 | 4668  | 8446   | DUSP11   | -0.0778 | 0.8360 |
| 11070 | F09 | 10121 | 11226  | GALNT6   | -0.0778 | 0.8360 |
| 31031 | D01 | 14242 | 667    | DST      | -0.0777 | 0.8361 |
| 11039 | A09 | 1412  | 84076  | TKTL2    | -0.0777 | 0.8363 |
| 31045 | H05 | 8050  | 404203 | SPINK6   | -0.0776 | 0.8363 |
| 51024 | D06 | 56350 | 26130  | GAPVD1   | -0.0775 | 0.8365 |
| 11061 | D07 | 2339  | 7528   | YY1      | -0.0775 | 0.8365 |
| 11080 | D08 | 9553  | 1281   | COL3A1   | -0.0775 | 0.8366 |
| 11046 | F08 | 8706  | 64799  | IQCH     | -0.0775 | 0.8366 |
| 11038 | C02 | 3714  | 27301  | APEX2    | -0.0775 | 0.8366 |
| 11080 | G01 | 3600  | 22974  | TPX2     | -0.0774 | 0.8367 |
| 51006 | C08 | 54839 | 8526   | DGKE     | -0.0774 | 0.8367 |
| 51029 | E05 | 56922 | 63027  | SLC22A23 | -0.0774 | 0.8368 |
| 11020 | H05 | 5566  | 3263   | HPX      | -0.0774 | 0.8368 |
| 11077 | H02 | 992   | 1200   | TPP1     | -0.0774 | 0.8368 |
| 11067 | E02 | 7087  | 23532  | PRAME    | -0.0773 | 0.8369 |
| 31041 | A03 | 7293  | 389119 | C3orf54  | -0.0773 | 0.8369 |
| 31029 | D03 | 14434 | 201965 | RWDD4A   | -0.0773 | 0.8370 |
| 11071 | C04 | 164   | 30011  | SH3KBP1  | -0.0772 | 0.8372 |
| 11001 | D03 | 8622  | 56940  | DUSP22   | -0.0771 | 0.8373 |
| 11084 | G11 | 7335  | 55840  | EAF2     | -0.0771 | 0.8374 |
| 51012 | D08 | 54392 | 114571 | SLC22A9  | -0.0770 | 0.8375 |
| 31010 | C02 | 11464 | 7589   | ZSCAN21  | -0.0770 | 0.8376 |
| 11082 | G02 | 2485  | 29931  | LOH3CR2A | -0.0770 | 0.8376 |
| 31009 | B06 | 11370 | 64091  | POPDC2   | -0.0769 | 0.8377 |
| 51029 | E09 | 53180 | 9584   | RBM39    | -0.0769 | 0.8378 |
| 31039 | F11 | 3877  | 9898   | UBAP2L   | -0.0768 | 0.8378 |
| 11087 | E01 | 3255  | 6050   | RNH1     | -0.0768 | 0.8378 |
| 31045 | D03 | 4359  | 7511   | XPNPEP1  | -0.0768 | 0.8379 |
| 11062 | B06 | 4785  | 10617  | STAMBP   | -0.0768 | 0.8379 |
| 31006 | B10 | 11053 | 8881   | CDC16    | -0.0768 | 0.8380 |
| 11038 | A12 | 5412  | 80185  | C8orf41  | -0.0767 | 0.8380 |
| 11028 | G04 | 1433  | 7447   | VSNL1    | -0.0767 | 0.8381 |
| 11086 | D01 | 1981  | 4115   | MAGEB4   | -0.0767 | 0.8381 |
| 11005 | C07 | 227   | 51389  | RWDD1    | -0.0766 | 0.8383 |
| 31033 | H06 | 14988 | 114041 | C21orf88 | -0.0765 | 0.8385 |
| 31036 | C03 | 11780 | 8353   | HIST1H3E | -0.0765 | 0.8386 |

|       |     |       |        |          |         |        |
|-------|-----|-------|--------|----------|---------|--------|
| 51033 | E06 | 53745 | NA     | NA       | -0.0764 | 0.8387 |
| 11019 | H01 | 7795  | 9274   | BCL7C    | -0.0764 | 0.8387 |
| 11045 | G01 | 606   | 140465 | MYL6B    | -0.0763 | 0.8388 |
| 51005 | F11 | 54587 | 1613   | DAPK3    | -0.0763 | 0.8388 |
| 11047 | B04 | 8128  | 7652   | ZNF99    | -0.0763 | 0.8388 |
| 11001 | B04 | 2817  | NA     | NA       | -0.0763 | 0.8389 |
| 51017 | B06 | 55999 | 92129  | RIPPLY1  | -0.0763 | 0.8389 |
| 11001 | H09 | 1800  | 51660  | BRP44L   | -0.0762 | 0.8390 |
| 31014 | A11 | 11866 | 7535   | ZAP70    | -0.0762 | 0.8391 |
| 51032 | B03 | 56593 | 56918  | C2orf83  | -0.0762 | 0.8391 |
| 51006 | C12 | 54119 | 3818   | KLKB1    | -0.0761 | 0.8392 |
| 31007 | G05 | 11050 | 55249  | YY1AP1   | -0.0761 | 0.8392 |
| 11009 | D02 | 3107  | 25852  | ARMC8    | -0.0761 | 0.8392 |
| 31007 | C05 | 10869 | 1836   | SLC26A2  | -0.0761 | 0.8393 |
| 51006 | A06 | 55588 | 10768  | AHCYL1   | -0.0760 | 0.8394 |
| 51021 | C09 | 56620 | 56938  | ARNTL2   | -0.0760 | 0.8394 |
| 11029 | B11 | 3282  | 65989  | DLK2     | -0.0760 | 0.8395 |
| 11060 | C03 | 5329  | 7756   | ZNF207   | -0.0760 | 0.8395 |
| 11028 | D06 | 7999  | 28985  | MCTS1    | -0.0759 | 0.8396 |
| 31027 | E04 | 14009 | 1142   | CHRNA3   | -0.0759 | 0.8396 |
| 31038 | H08 | 5262  | 84329  | HVCN1    | -0.0759 | 0.8396 |
| 51018 | G10 | 55998 | 54508  | FLJ11235 | -0.0759 | 0.8397 |
| 11082 | B01 | 7057  | 56901  | NDUFA4L2 | -0.0758 | 0.8398 |
| 11068 | E09 | 778   | 23633  | KPNA6    | -0.0758 | 0.8398 |
| 11081 | F05 | 93    | 85027  | C5orf62  | -0.0758 | 0.8398 |
| 11029 | E05 | 5149  | 8894   | EIF2S2   | -0.0758 | 0.8398 |
| 31042 | D04 | 5137  | 93611  | FBXO44   | -0.0758 | 0.8398 |
| 11083 | B11 | 2690  | 51651  | PTRH2    | -0.0757 | 0.8401 |
| 51010 | F12 | 55030 | 29966  | STRN3    | -0.0756 | 0.8402 |
| 11059 | H04 | 10087 | 23387  | SIK3     | -0.0756 | 0.8403 |
| 11088 | A12 | 3080  | 831    | CAST     | -0.0756 | 0.8403 |
| 31015 | H11 | 12759 | 54932  | EXD3     | -0.0756 | 0.8403 |
| 11035 | G04 | 1364  | 8027   | STAM     | -0.0755 | 0.8404 |
| 11075 | C06 | 8699  | 117155 | CATSPER2 | -0.0755 | 0.8404 |
| 11030 | C08 | 3363  | 10898  | CPSF4    | -0.0754 | 0.8407 |
| 51032 | G09 | 55649 | 83699  | SH3BGRL2 | -0.0754 | 0.8407 |
| 31038 | E12 | 7697  | 54869  | EPS8L1   | -0.0753 | 0.8408 |
| 31005 | G02 | 10975 | 256227 | MGC87042 | -0.0753 | 0.8408 |
| 31039 | B04 | 572   | 4501   | MT1X     | -0.0753 | 0.8408 |
| 11079 | D10 | 4203  | 5979   | RET      | -0.0753 | 0.8408 |
| 11066 | E04 | 7147  | 2202   | EFEMP1   | -0.0753 | 0.8409 |
| 11005 | D09 | 456   | 51107  | APH1A    | -0.0753 | 0.8409 |
| 31002 | H11 | 10568 | 84460  | ZMAT1    | -0.0752 | 0.8411 |
| 11077 | G07 | 200   | 329    | BIRC2    | -0.0751 | 0.8412 |

|       |     |       |        |           |         |        |
|-------|-----|-------|--------|-----------|---------|--------|
| 31001 | E11 | 10775 | 55283  | MCOLN3    | -0.0751 | 0.8412 |
| 31032 | C07 | 14723 | 2879   | GPX4      | -0.0751 | 0.8412 |
| 11085 | B02 | 8845  | 25802  | LMOD1     | -0.0751 | 0.8412 |
| 51020 | A08 | 55838 | 117154 | DACH2     | -0.0751 | 0.8413 |
| 51015 | F09 | 53017 | 11185  | INMT      | -0.0751 | 0.8413 |
| 31042 | F07 | 5714  | 10136  | CELA3A    | -0.0751 | 0.8413 |
| 11032 | C07 | 7862  | 1849   | DUSP7     | -0.0750 | 0.8414 |
| 11075 | A11 | 5512  | 10393  | ANAPC10   | -0.0749 | 0.8415 |
| 51024 | H06 | 55192 | 9353   | SLIT2     | -0.0749 | 0.8415 |
| 51004 | H10 | 53990 | 8600   | TNFSF11   | -0.0749 | 0.8416 |
| 11024 | E12 | 10043 | 55074  | OXR1      | -0.0749 | 0.8416 |
| 51030 | G10 | 55418 | 55687  | TRMU      | -0.0749 | 0.8416 |
| 11071 | A02 | 9069  | 29994  | BAZ2B     | -0.0749 | 0.8416 |
| 31041 | F11 | 4034  | 8566   | PDXK      | -0.0749 | 0.8416 |
| 51002 | F05 | 52845 | 80350  | LPAL2     | -0.0748 | 0.8418 |
| 11054 | F10 | 4504  | 11199  | ANXA10    | -0.0748 | 0.8418 |
| 11070 | D01 | 9348  | 55672  | NBPF1     | -0.0748 | 0.8418 |
| 31044 | E03 | 3773  | 3588   | IL10RB    | -0.0748 | 0.8419 |
| 31045 | C04 | 7592  | 9961   | MVP       | -0.0748 | 0.8419 |
| 51002 | F03 | 54606 | 246744 | STH       | -0.0747 | 0.8419 |
| 31010 | C09 | 11525 | 6814   | STXBP3    | -0.0747 | 0.8420 |
| 11041 | G02 | 8864  | 112398 | EGLN2     | -0.0746 | 0.8421 |
| 31036 | D03 | 11148 | 284129 | SLC26A11  | -0.0746 | 0.8421 |
| 31041 | G06 | 7673  | 27158  | NDOR1     | -0.0746 | 0.8422 |
| 11062 | H05 | 1324  | 8910   | SGCE      | -0.0746 | 0.8422 |
| 11025 | E09 | 4761  | 163    | AP2B1     | -0.0745 | 0.8423 |
| 11062 | H07 | 4372  | 123    | PLIN2     | -0.0745 | 0.8423 |
| 51032 | A03 | 56771 | 51716  | CES4      | -0.0745 | 0.8424 |
| 51031 | C10 | 55582 | 338328 | GPIHBP1   | -0.0745 | 0.8424 |
| 31024 | B05 | 13392 | 7086   | TKT       | -0.0745 | 0.8424 |
| 11012 | H07 | 7996  | 6729   | SRP54     | -0.0744 | 0.8425 |
| 31021 | G05 | 13306 | 3827   | KNG1      | -0.0744 | 0.8426 |
| 11048 | E01 | 1765  | 55529  | TMEM55A   | -0.0743 | 0.8427 |
| 31024 | F03 | 13559 | 3782   | KCNN3     | -0.0743 | 0.8428 |
| 11029 | E02 | 4080  | 3006   | HIST1H1C  | -0.0743 | 0.8428 |
| 51033 | C12 | 53483 | 26236  | C6orf54   | -0.0742 | 0.8429 |
| 31012 | H02 | 12341 | 10330  | CNPY2     | -0.0742 | 0.8429 |
| 51023 | D04 | 55888 | 8646   | CHRD      | -0.0742 | 0.8429 |
| 11042 | B09 | 5483  | 2170   | FABP3     | -0.0742 | 0.8429 |
| 11024 | H10 | 9841  | 84075  | FSCB      | -0.0742 | 0.8430 |
| 31043 | C03 | 7141  | 57215  | THAP11    | -0.0742 | 0.8430 |
| 31014 | A07 | 12109 | 1586   | CYP17A1   | -0.0741 | 0.8431 |
| 51034 | B02 | 54982 | 401296 | LOC401296 | -0.0741 | 0.8431 |
| 51028 | C10 | 55665 | 253012 | HEPACAM2  | -0.0741 | 0.8432 |

|       |     |       |        |            |         |        |
|-------|-----|-------|--------|------------|---------|--------|
| 31025 | B12 | 13812 | 117286 | CIB3       | -0.0740 | 0.8433 |
| 11084 | G10 | 8956  | 9112   | MTA1       | -0.0740 | 0.8433 |
| 31045 | C01 | 110   | 9638   | FEZ1       | -0.0740 | 0.8434 |
| 31027 | G08 | 15034 | 407738 | FAM19A1    | -0.0739 | 0.8435 |
| 11022 | G04 | 3986  | 5498   | PPOX       | -0.0739 | 0.8435 |
| 51001 | D08 | 54854 | 388815 | C21orf34   | -0.0739 | 0.8436 |
| 11029 | G02 | 4220  | 79269  | DCAF10     | -0.0739 | 0.8436 |
| 11064 | B11 | 4779  | 10629  | TAF6L      | -0.0739 | 0.8436 |
| 51004 | F10 | 54693 | 26493  | OR8B8      | -0.0739 | 0.8436 |
| 11029 | A04 | 552   | 10534  | SSSCA1     | -0.0738 | 0.8437 |
| 31021 | C07 | 13140 | 27286  | SRPX2      | -0.0738 | 0.8437 |
| 11035 | E07 | 6831  | 1797   | DOM3Z      | -0.0738 | 0.8437 |
| 11038 | C09 | 5206  | 55697  | VAC14      | -0.0737 | 0.8439 |
| 11039 | A11 | 7873  | 9149   | DYRK1B     | -0.0737 | 0.8439 |
| 51001 | E07 | 52603 | 404201 | NCRNA00247 | -0.0737 | 0.8439 |
| 31044 | B05 | 4976  | 9830   | TRIM14     | -0.0737 | 0.8439 |
| 51012 | E12 | 53767 | 10576  | CCT2       | -0.0737 | 0.8439 |
| 31025 | E09 | 14011 | 1671   | DEFA6      | -0.0737 | 0.8440 |
| 11088 | C02 | 5734  | 7076   | TIMP1      | -0.0736 | 0.8441 |
| 31040 | F06 | 9714  | 146880 | LOC146880  | -0.0736 | 0.8442 |
| 11038 | C04 | 3319  | 78995  | C17orf53   | -0.0736 | 0.8442 |
| 51029 | F12 | 55309 | 10159  | ATP6AP2    | -0.0735 | 0.8443 |
| 11014 | H04 | 1798  | 25788  | RAD54B     | -0.0735 | 0.8444 |
| 11029 | B12 | 4631  | 533    | ATP6V0B    | -0.0734 | 0.8445 |
| 11062 | B08 | 478   | 11074  | TRIM31     | -0.0734 | 0.8446 |
| 31027 | E10 | 15057 | 11066  | SNRNP35    | -0.0733 | 0.8446 |
| 51005 | G06 | 54326 | 1896   | EDA        | -0.0732 | 0.8448 |
| 11040 | A12 | 2297  | 133874 | C5orf58    | -0.0732 | 0.8449 |
| 11035 | A02 | 7071  | 11116  | FGFR1OP    | -0.0732 | 0.8449 |
| 11069 | A09 | 3046  | 79623  | GALNT14    | -0.0732 | 0.8449 |
| 11020 | B04 | 5655  | 3422   | IDI1       | -0.0732 | 0.8449 |
| 51002 | C12 | 55042 | 399900 | LOC399900  | -0.0732 | 0.8449 |
| 31004 | H02 | 10725 | 64799  | IQCH       | -0.0731 | 0.8451 |
| 51005 | H05 | 55259 | 8537   | BCAS1      | -0.0731 | 0.8452 |
| 31013 | F11 | 12340 | 8869   | ST3GAL5    | -0.0730 | 0.8452 |
| 11028 | G07 | 8642  | 85313  | PPIL4      | -0.0730 | 0.8453 |
| 31018 | H11 | 13076 | 27306  | HPGDS      | -0.0730 | 0.8453 |
| 51020 | B08 | 56408 | 6870   | TACR3      | -0.0730 | 0.8453 |
| 11020 | D07 | 7916  | 79810  | PTCD2      | -0.0730 | 0.8453 |
| 11075 | D05 | 4895  | 57379  | AICDA      | -0.0730 | 0.8453 |
| 51008 | G05 | 53585 | 1310   | COL19A1    | -0.0730 | 0.8453 |
| 11040 | C07 | 7290  | 84525  | HOPX       | -0.0729 | 0.8454 |
| 11078 | H03 | 6479  | 8453   | CUL2       | -0.0729 | 0.8454 |
| 11038 | E06 | 6251  | 8208   | CHAF1B     | -0.0729 | 0.8454 |

|       |     |       |        |           |         |        |
|-------|-----|-------|--------|-----------|---------|--------|
| 31001 | A02 | 10457 | 219990 | PLAC1L    | -0.0729 | 0.8455 |
| 11072 | A06 | 3760  | 8314   | BAP1      | -0.0729 | 0.8455 |
| 11012 | F08 | 6179  | 58491  | ZNF71     | -0.0729 | 0.8456 |
| 11036 | F12 | 8236  | 54905  | CYP2W1    | -0.0728 | 0.8457 |
| 11089 | A04 | 1410  | 66036  | MTMR9     | -0.0728 | 0.8457 |
| 11012 | C11 | 2992  | 7071   | KLF10     | -0.0728 | 0.8457 |
| 51029 | C04 | 56467 | 93492  | TPTE2     | -0.0728 | 0.8457 |
| 11044 | F11 | 399   | 998    | CDC42     | -0.0727 | 0.8459 |
| 31030 | C11 | 14450 | 55086  | CXorf57   | -0.0726 | 0.8460 |
| 11038 | H08 | 1293  | 7857   | SCG2      | -0.0726 | 0.8460 |
| 11054 | G04 | 6515  | 60526  | C2orf43   | -0.0726 | 0.8460 |
| 31001 | H11 | 10751 | 112817 | DHDPSL    | -0.0726 | 0.8461 |
| 11062 | B07 | 5488  | 55032  | SLC35A5   | -0.0726 | 0.8461 |
| 11021 | H02 | 7469  | 55658  | RNF126    | -0.0725 | 0.8462 |
| 11072 | F12 | 9345  | 283987 | C17orf28  | -0.0725 | 0.8462 |
| 31032 | F09 | 14705 | 2620   | GAS2      | -0.0725 | 0.8463 |
| 31026 | G07 | 13893 | 135656 | DPCR1     | -0.0724 | 0.8464 |
| 31023 | F02 | 13403 | 51015  | ISOC1     | -0.0724 | 0.8464 |
| 51008 | B04 | 54245 | 1730   | DIAPH2    | -0.0724 | 0.8464 |
| 51025 | C07 | 56300 | 4299   | AFF1      | -0.0724 | 0.8464 |
| 11069 | C10 | 6804  | 51477  | ISYNA1    | -0.0724 | 0.8465 |
| 11041 | B05 | 8936  | 10397  | NDRG1     | -0.0724 | 0.8465 |
| 11055 | H06 | 7578  | 27348  | TOR1B     | -0.0724 | 0.8465 |
| 51005 | D04 | 55114 | 645121 | CCNI2     | -0.0723 | 0.8467 |
| 51029 | D06 | 55638 | 3880   | KRT19     | -0.0723 | 0.8467 |
| 11079 | G01 | 2109  | 11183  | MAP4K5    | -0.0723 | 0.8467 |
| 11063 | F07 | 4136  | 79157  | MFSD11    | -0.0722 | 0.8469 |
| 31014 | F11 | 11907 | 4281   | MID1      | -0.0722 | 0.8469 |
| 51033 | A06 | 53928 | 337971 | KRTAP19-4 | -0.0721 | 0.8470 |
| 11008 | D03 | 2866  | 4760   | NEUROD1   | -0.0721 | 0.8471 |
| 11087 | B06 | 7867  | 1435   | CSF1      | -0.0721 | 0.8471 |
| 31006 | B04 | 10853 | 122809 | SOCS4     | -0.0721 | 0.8471 |
| 11020 | E10 | 5643  | 339175 | METTL2A   | -0.0720 | 0.8471 |
| 11040 | C10 | 4243  | 84734  | FAM167B   | -0.0720 | 0.8472 |
| 11009 | G02 | 6551  | 81628  | TSC22D4   | -0.0720 | 0.8472 |
| 31004 | C01 | 10418 | 27072  | VPS41     | -0.0720 | 0.8472 |
| 31025 | F04 | 13572 | 6405   | SEMA3F    | -0.0720 | 0.8472 |
| 31024 | B12 | 13444 | 9159   | PCSK7     | -0.0720 | 0.8472 |
| 51022 | H02 | 56184 | 933    | CD22      | -0.0720 | 0.8473 |
| 51025 | A07 | 56892 | 26030  | PLEKHG3   | -0.0720 | 0.8473 |
| 11050 | D09 | 5887  | 55156  | ARMC1     | -0.0719 | 0.8474 |
| 51016 | C08 | 56001 | 203547 | VMA21     | -0.0719 | 0.8474 |
| 11040 | B12 | 5831  | 5441   | POLR2L    | -0.0719 | 0.8475 |
| 11020 | D06 | 5495  | NA     | NA        | -0.0718 | 0.8475 |

|       |     |       |        |            |         |        |
|-------|-----|-------|--------|------------|---------|--------|
| 11039 | B11 | 5242  | 7571   | ZNF23      | -0.0718 | 0.8476 |
| 11029 | F02 | 1183  | 85437  | ZCRB1      | -0.0718 | 0.8476 |
| 51006 | F07 | 54103 | 116154 | PHACTR3    | -0.0718 | 0.8476 |
| 31002 | B10 | 10770 | 57711  | ZNF529     | -0.0718 | 0.8477 |
| 11073 | D12 | 2477  | 149111 | CNIH3      | -0.0718 | 0.8477 |
| 31016 | H09 | 12686 | 23543  | RBM9       | -0.0717 | 0.8478 |
| 11084 | E02 | 8396  | 51303  | FKBP11     | -0.0717 | 0.8478 |
| 11016 | F09 | 5401  | 84856  | LOC84856   | -0.0717 | 0.8478 |
| 11085 | H04 | 6075  | 8624   | PSMG1      | -0.0717 | 0.8478 |
| 31017 | E08 | 13271 | 554203 | NCRNA00183 | -0.0717 | 0.8479 |
| 31016 | F09 | 12629 | 56895  | AGPAT4     | -0.0717 | 0.8479 |
| 51011 | G09 | 52921 | 9641   | IKBKE      | -0.0717 | 0.8479 |
| 11030 | G05 | 9490  | 197259 | MLKL       | -0.0716 | 0.8480 |
| 51033 | D12 | 53816 | 7873   | MANF       | -0.0716 | 0.8480 |
| 31019 | D02 | 13122 | 26147  | PHF19      | -0.0715 | 0.8482 |
| 51020 | E05 | 56587 | 79634  | SCRN3      | -0.0714 | 0.8484 |
| 31025 | D03 | 13732 | 120    | ADD3       | -0.0714 | 0.8484 |
| 51029 | C10 | 55397 | 142910 | LIPJ       | -0.0714 | 0.8484 |
| 31005 | D07 | 11286 | 84142  | FAM175A    | -0.0714 | 0.8485 |
| 11065 | A10 | 3890  | 4841   | NONO       | -0.0714 | 0.8485 |
| 51034 | D11 | 53618 | 441362 | REXO1L6P   | -0.0713 | 0.8486 |
| 11043 | A04 | 5645  | 2993   | GYPA       | -0.0713 | 0.8486 |
| 11083 | H10 | 2626  | 55179  | FAIM       | -0.0712 | 0.8487 |
| 31009 | E09 | 11725 | 51176  | LEF1       | -0.0712 | 0.8488 |
| 11004 | H09 | 716   | 94081  | SFXN1      | -0.0711 | 0.8489 |
| 11082 | C11 | 8476  | 222171 | PRR15      | -0.0711 | 0.8490 |
| 11021 | A05 | 5738  | 9125   | RQCD1      | -0.0711 | 0.8490 |
| 31043 | G02 | 7717  | 6818   | SULT1A3    | -0.0711 | 0.8490 |
| 11008 | F07 | 3416  | 1801   | DPH1       | -0.0711 | 0.8491 |
| 51026 | G01 | 55393 | 9990   | SLC12A6    | -0.0710 | 0.8491 |
| 11058 | A11 | 3548  | 51114  | ZDHHC9     | -0.0710 | 0.8491 |
| 11066 | F01 | 483   | 26503  | SLC17A5    | -0.0710 | 0.8491 |
| 11039 | C02 | 5877  | 55734  | ZFP64      | -0.0710 | 0.8492 |
| 31020 | C04 | 12831 | 6128   | RPL6       | -0.0710 | 0.8492 |
| 31033 | D03 | 14684 | 55738  | ARFGAP1    | -0.0710 | 0.8492 |
| 31004 | D03 | 10563 | 138724 | C9orf131   | -0.0710 | 0.8493 |
| 11069 | A02 | 6042  | 114088 | TRIM9      | -0.0709 | 0.8493 |
| 11084 | E07 | 9907  | 5611   | DNAJC3     | -0.0709 | 0.8494 |
| 11069 | H10 | 7036  | 9567   | GTPBP1     | -0.0709 | 0.8495 |
| 31016 | G11 | 12508 | 898    | CCNE1      | -0.0708 | 0.8495 |
| 31040 | F07 | 9748  | 126823 | KLHDC9     | -0.0708 | 0.8496 |
| 51009 | A04 | 53093 | 1821   | DRP2       | -0.0708 | 0.8496 |
| 31032 | A10 | 14706 | 11137  | PWP1       | -0.0708 | 0.8496 |
| 11039 | G07 | 8065  | 6733   | SRPK2      | -0.0708 | 0.8496 |



|       |     |       |        |           |         |        |
|-------|-----|-------|--------|-----------|---------|--------|
| 11025 | D08 | 2099  | 222546 | RFX6      | -0.0707 | 0.8497 |
| 51031 | G11 | 53316 | 439921 | MXRA7     | -0.0707 | 0.8498 |
| 11050 | H09 | 2599  | 80224  | NUBPL     | -0.0706 | 0.8499 |
| 11009 | D03 | 3647  | 10296  | MAEA      | -0.0706 | 0.8499 |
| 11085 | E04 | 7226  | 51300  | C3orf1    | -0.0706 | 0.8500 |
| 11078 | A08 | 2424  | 988    | CDC5L     | -0.0706 | 0.8500 |
| 11080 | B06 | 2444  | 1663   | DDX11     | -0.0706 | 0.8500 |
| 11079 | F01 | 2533  | 5834   | PYGB      | -0.0706 | 0.8500 |
| 31036 | B07 | 12054 | 54880  | BCOR      | -0.0706 | 0.8500 |
| 51034 | A04 | 55086 | 5873   | RAB27A    | -0.0706 | 0.8500 |
| 51029 | C08 | 55499 | 5161   | PDHA2     | -0.0705 | 0.8501 |
| 31027 | C04 | 13916 | 3762   | KCNJ5     | -0.0705 | 0.8502 |
| 31036 | H04 | 11104 | 5998   | RGS3      | -0.0704 | 0.8503 |
| 31024 | G04 | 13622 | 8463   | TEAD2     | -0.0704 | 0.8503 |
| 31013 | B09 | 12002 | 84722  | PSRC1     | -0.0704 | 0.8503 |
| 31013 | C03 | 12144 | 84868  | HAVCR2    | -0.0704 | 0.8504 |
| 11002 | E03 | 5685  | 55967  | NDUFA12   | -0.0704 | 0.8504 |
| 51029 | G09 | 11727 | 6767   | ST13      | -0.0703 | 0.8505 |
| 51001 | B07 | 54771 | 149018 | LELP1     | -0.0703 | 0.8505 |
| 11028 | C01 | 9762  | 25836  | NIPBL     | -0.0702 | 0.8507 |
| 31037 | D08 | 15058 | 81602  | CDADC1    | -0.0702 | 0.8508 |
| 31006 | C09 | 10845 | 8462   | KLF11     | -0.0702 | 0.8508 |
| 31019 | D04 | 13043 | 5680   | PSG11     | -0.0701 | 0.8509 |
| 51003 | C09 | 52624 | 1945   | EFNA4     | -0.0701 | 0.8510 |
| 51006 | B07 | 54355 | 253738 | EBF3      | -0.0701 | 0.8510 |
| 11039 | D07 | 1773  | 162333 | MARCH10   | -0.0701 | 0.8510 |
| 11064 | D02 | 7250  | 64374  | SIL1      | -0.0700 | 0.8510 |
| 51013 | G08 | 54082 | 26121  | PRPF31    | -0.0700 | 0.8511 |
| 11067 | E05 | 6514  | 81607  | PVRL4     | -0.0700 | 0.8511 |
| 11055 | E02 | 4194  | 11118  | BTN3A2    | -0.0700 | 0.8511 |
| 11056 | C10 | 8123  | 203427 | SLC25A43  | -0.0700 | 0.8512 |
| 11040 | B03 | 8336  | 26238  | C6orf123  | -0.0700 | 0.8512 |
| 51020 | G01 | 55799 | 5273   | SERPINB10 | -0.0699 | 0.8513 |
| 31045 | F09 | 4007  | 2521   | FUS       | -0.0699 | 0.8513 |
| 11079 | H05 | 2510  | 9138   | ARHGEF1   | -0.0699 | 0.8514 |
| 31042 | G06 | 6619  | 112724 | RDH13     | -0.0699 | 0.8514 |
| 31026 | B06 | 13820 | 2668   | GDNF      | -0.0698 | 0.8515 |
| 11024 | D03 | 9723  | 54970  | TTC12     | -0.0698 | 0.8515 |
| 31044 | E05 | 4177  | 6663   | SOX10     | -0.0698 | 0.8516 |
| 51022 | H08 | 56199 | 9724   | UTP14C    | -0.0697 | 0.8517 |
| 11012 | B06 | 264   | 84864  | MINA      | -0.0697 | 0.8517 |
| 51001 | G05 | 54394 | 337882 | KRTAP19-1 | -0.0697 | 0.8517 |
| 31018 | E05 | 13064 | 10268  | RAMP3     | -0.0697 | 0.8517 |
| 51011 | H04 | 53579 | 55857  | PLK1S1    | -0.0696 | 0.8519 |

|       |     |       |        |          |         |        |
|-------|-----|-------|--------|----------|---------|--------|
| 11028 | H03 | 1700  | 84569  | LYZL1    | -0.0696 | 0.8519 |
| 11070 | C12 | 8489  | 84190  | C12orf26 | -0.0695 | 0.8520 |
| 11044 | E03 | 425   | 140739 | UBE2F    | -0.0695 | 0.8521 |
| 11019 | G09 | 3451  | 10229  | COQ7     | -0.0695 | 0.8521 |
| 31022 | A05 | 13314 | 3049   | HBQ1     | -0.0695 | 0.8521 |
| 51020 | G03 | 55844 | 3632   | INPP5A   | -0.0695 | 0.8521 |
| 31042 | C07 | 7012  | 3248   | HPGD     | -0.0692 | 0.8526 |
| 11044 | F10 | 8743  | 9054   | NFS1     | -0.0692 | 0.8527 |
| 51031 | H08 | 55370 | 285498 | RNF212   | -0.0691 | 0.8529 |
| 11057 | G10 | 2848  | 55771  | PRR11    | -0.0691 | 0.8529 |
| 11069 | E08 | 4828  | 8318   | CDC45    | -0.0691 | 0.8529 |
| 11004 | F10 | 5394  | 60343  | FAM3A    | -0.0690 | 0.8530 |
| 51030 | H09 | 56910 | 400793 | C1orf226 | -0.0690 | 0.8530 |
| 11048 | B11 | 9595  | 1535   | CYBA     | -0.0690 | 0.8532 |
| 31032 | E03 | 14580 | 3554   | IL1R1    | -0.0689 | 0.8533 |
| 51004 | G02 | 53000 | 9941   | EXOG     | -0.0688 | 0.8534 |
| 11027 | H10 | 3192  | 1026   | CDKN1A   | -0.0688 | 0.8534 |
| 31028 | C03 | 15030 | 5662   | PSD      | -0.0688 | 0.8535 |
| 51003 | A01 | 52641 | 145858 | C15orf32 | -0.0688 | 0.8535 |
| 51009 | B03 | 53044 | 9851   | KIAA0753 | -0.0688 | 0.8536 |
| 11079 | C02 | 1302  | 55231  | CCDC87   | -0.0687 | 0.8536 |
| 11036 | B08 | 3154  | 8517   | IKBKG    | -0.0687 | 0.8536 |
| 51006 | A12 | 53440 | 22864  | R3HDM2   | -0.0687 | 0.8536 |
| 11080 | C10 | 3493  | 9785   | DHX38    | -0.0687 | 0.8536 |
| 11042 | D06 | 7194  | 3535   | IGL@     | -0.0687 | 0.8536 |
| 11082 | D05 | 6274  | 26515  | FXC1     | -0.0687 | 0.8537 |
| 11039 | F05 | 6058  | 10165  | SLC25A13 | -0.0687 | 0.8537 |
| 11039 | H11 | 5892  | 83746  | L3MBTL2  | -0.0687 | 0.8537 |
| 11021 | B01 | 3710  | 10954  | PDIA5    | -0.0687 | 0.8538 |
| 31003 | H03 | 10317 | 2861   | GPR37    | -0.0686 | 0.8538 |
| 11025 | A01 | 9984  | 23064  | SETX     | -0.0686 | 0.8538 |
| 11045 | C07 | 7876  | 114971 | PTPMT1   | -0.0686 | 0.8539 |
| 51005 | D02 | 54720 | 3626   | INHBC    | -0.0686 | 0.8539 |
| 11070 | F10 | 10156 | 80304  | C2orf44  | -0.0686 | 0.8539 |
| 11078 | E12 | 6760  | 4439   | MSH5     | -0.0686 | 0.8539 |
| 51014 | H03 | 52820 | 10917  | BTNL3    | -0.0686 | 0.8539 |
| 11003 | E03 | 5486  | 5052   | PRDX1    | -0.0686 | 0.8540 |
| 31018 | E01 | 12894 | 10791  | VAMP5    | -0.0686 | 0.8540 |
| 31039 | F09 | 436   | 10553  | HTATIP2  | -0.0685 | 0.8540 |
| 31018 | C07 | 12872 | 5558   | PRIM2    | -0.0684 | 0.8542 |
| 31045 | G04 | 6814  | 29894  | CPSF1    | -0.0683 | 0.8544 |
| 51025 | B10 | 53249 | 5293   | PIK3CD   | -0.0683 | 0.8544 |
| 31027 | G10 | 14683 | 27434  | POLM     | -0.0683 | 0.8544 |
| 11073 | H01 | 8913  | 60343  | FAM3A    | -0.0683 | 0.8544 |

|       |     |       |        |          |         |        |
|-------|-----|-------|--------|----------|---------|--------|
| 11036 | H09 | 3357  | 7280   | TUBB2A   | -0.0683 | 0.8545 |
| 11051 | E10 | 3067  | 93129  | ORAI3    | -0.0683 | 0.8546 |
| 31012 | D09 | 12288 | NA     | NA       | -0.0683 | 0.8546 |
| 11082 | F07 | 8681  | 199704 | ZNF585A  | -0.0682 | 0.8546 |
| 11046 | D04 | 9264  | 9491   | PSMF1    | -0.0682 | 0.8546 |
| 11072 | F01 | 298   | 84340  | GFM2     | -0.0682 | 0.8546 |
| 11052 | A12 | 932   | 10428  | CFDP1    | -0.0682 | 0.8547 |
| 51010 | G07 | 52841 | 55243  | KIRREL   | -0.0682 | 0.8547 |
| 31027 | D07 | 13986 | 85366  | MYLK2    | -0.0682 | 0.8547 |
| 31005 | C12 | 11125 | 60677  | CELF6    | -0.0682 | 0.8547 |
| 11041 | G04 | 5129  | 84316  | LSMD1    | -0.0682 | 0.8547 |
| 51011 | D07 | 53107 | 9175   | MAP3K13  | -0.0682 | 0.8547 |
| 31001 | E03 | 10504 | 51239  | ANKRD39  | -0.0681 | 0.8548 |
| 11025 | D11 | 4573  | 8241   | RBM10    | -0.0681 | 0.8549 |
| 51015 | G02 | 52706 | 94097  | SFXN5    | -0.0681 | 0.8550 |
| 31037 | H07 | 14346 | 286122 | C8orf31  | -0.0680 | 0.8551 |
| 51027 | D03 | 56652 | 5212   | VIT      | -0.0680 | 0.8551 |
| 31004 | D06 | 11037 | 114932 | MRFAP1L1 | -0.0680 | 0.8551 |
| 11021 | G05 | 3181  | 4108   | MAGEA9   | -0.0679 | 0.8552 |
| 11034 | E06 | 2146  | 1996   | ELAVL4   | -0.0679 | 0.8553 |
| 11082 | H04 | 9089  | 26140  | TTLL3    | -0.0678 | 0.8554 |
| 11048 | G10 | 580   | 8417   | STX7     | -0.0678 | 0.8555 |
| 11049 | C10 | 8439  | 6955   | TRA@     | -0.0677 | 0.8556 |
| 51020 | A01 | 56145 | 3767   | KCNJ11   | -0.0677 | 0.8556 |
| 11069 | F10 | 9435  | 221786 | FAM200A  | -0.0676 | 0.8558 |
| 11042 | E12 | 1902  | 255758 | TCTEX1D2 | -0.0676 | 0.8559 |
| 11001 | G01 | 629   | 98     | ACYP2    | -0.0676 | 0.8559 |
| 11052 | G11 | 1937  | 132851 | SPATA4   | -0.0676 | 0.8559 |
| 31039 | B02 | 7454  | 10072  | DPP3     | -0.0675 | 0.8560 |
| 31022 | G08 | 13320 | 7428   | VHL      | -0.0675 | 0.8560 |
| 31041 | B12 | 4314  | 653145 | ANXA8    | -0.0675 | 0.8560 |
| 51020 | D08 | 56781 | 157724 | SLC7A13  | -0.0675 | 0.8560 |
| 31005 | C06 | 10981 | 4747   | NEFL     | -0.0675 | 0.8561 |
| 51032 | F12 | 56944 | 644186 | C22orf41 | -0.0675 | 0.8561 |
| 51021 | D04 | 56051 | 201176 | ARHGAP27 | -0.0675 | 0.8561 |
| 11084 | A06 | 3313  | 79004  | CUEDC2   | -0.0674 | 0.8562 |
| 11026 | H09 | 2707  | 10410  | IFITM3   | -0.0674 | 0.8563 |
| 31030 | D05 | 14203 | 57205  | ATP10D   | -0.0674 | 0.8563 |
| 11078 | E04 | 2098  | 80258  | EFHC2    | -0.0673 | 0.8564 |
| 51006 | A05 | 53523 | 285676 | ZNF454   | -0.0673 | 0.8564 |
| 11078 | D07 | 6612  | 7409   | VAV1     | -0.0672 | 0.8566 |
| 11086 | A08 | 5497  | 23071  | ERP44    | -0.0672 | 0.8567 |
| 31017 | A10 | 12890 | 9939   | RBM8A    | -0.0672 | 0.8567 |
| 51004 | D10 | 54225 | 2859   | GPR35    | -0.0671 | 0.8568 |

|       |     |       |        |           |         |        |
|-------|-----|-------|--------|-----------|---------|--------|
| 11049 | A05 | 2371  | 6192   | RPS4Y1    | -0.0671 | 0.8568 |
| 31019 | A07 | 12948 | 10864  | SLC22A7   | -0.0671 | 0.8569 |
| 11041 | F02 | 5006  | 1979   | EIF4EBP2  | -0.0670 | 0.8570 |
| 31045 | D02 | 671   | 3340   | NDST1     | -0.0670 | 0.8571 |
| 51029 | A10 | 55430 | 29118  | DDX25     | -0.0669 | 0.8572 |
| 11046 | E10 | 1607  | 54937  | SOHLH2    | -0.0669 | 0.8573 |
| 51031 | G02 | 55445 | 284618 | C1orf104  | -0.0668 | 0.8574 |
| 11065 | C12 | 1159  | 147837 | ZNF563    | -0.0668 | 0.8574 |
| 31003 | C04 | 10582 | 28965  | SLC27A6   | -0.0668 | 0.8574 |
| 31024 | D05 | 13504 | 116841 | SNAP47    | -0.0668 | 0.8574 |
| 51013 | E07 | 54463 | 147700 | KLC3      | -0.0668 | 0.8574 |
| 11062 | E03 | 2810  | 655    | BMP7      | -0.0668 | 0.8574 |
| 11025 | D10 | 1950  | 54881  | TEX10     | -0.0667 | 0.8576 |
| 11088 | A02 | 4724  | 27352  | SGSM3     | -0.0667 | 0.8576 |
| 51003 | F07 | 53744 | 140258 | KRTAP13-1 | -0.0667 | 0.8577 |
| 51031 | C12 | 56702 | 5554   | PRH1      | -0.0667 | 0.8577 |
| 51030 | C10 | 55280 | 55096  | EBLN2     | -0.0666 | 0.8577 |
| 31033 | A03 | 14742 | 9639   | ARHGEF10  | -0.0666 | 0.8579 |
| 51013 | H05 | 53049 | 7626   | ZNF75D    | -0.0666 | 0.8579 |
| 11079 | H06 | 5874  | 4077   | NBR1      | -0.0665 | 0.8580 |
| 11080 | B01 | 4496  | 60509  | AGBL5     | -0.0665 | 0.8580 |
| 31036 | A03 | 10366 | 9884   | LRRC37A   | -0.0665 | 0.8580 |
| 31033 | B08 | 14917 | 10632  | ATP5L     | -0.0665 | 0.8581 |
| 51003 | C12 | 53898 | 25824  | PRDX5     | -0.0665 | 0.8581 |
| 31007 | H03 | 11196 | 64137  | ABCG4     | -0.0664 | 0.8581 |
| 11043 | E09 | 5779  | 5478   | PPIA      | -0.0664 | 0.8582 |
| 51027 | F04 | 56860 | 57573  | ZNF471    | -0.0664 | 0.8582 |
| 51004 | A08 | 56152 | 55819  | RNF130    | -0.0664 | 0.8582 |
| 31030 | C04 | 14183 | 22872  | SEC31A    | -0.0664 | 0.8583 |
| 11003 | A06 | 9913  | 201266 | SLC39A11  | -0.0664 | 0.8583 |
| 11080 | A01 | 6795  | 80222  | TARS2     | -0.0663 | 0.8583 |
| 11012 | A03 | 4801  | 6050   | RNH1      | -0.0663 | 0.8584 |
| 51014 | E01 | 54740 | 2569   | GABRR1    | -0.0663 | 0.8585 |
| 11017 | A04 | 3871  | 6230   | RPS25     | -0.0663 | 0.8585 |
| 31043 | H06 | 6338  | 1359   | CPA3      | -0.0663 | 0.8585 |
| 11084 | C02 | 7244  | 30833  | NT5C      | -0.0662 | 0.8586 |
| 11070 | G11 | 3037  | 5830   | PEX5      | -0.0662 | 0.8586 |
| 11086 | A04 | 1366  | 130951 | C2orf65   | -0.0662 | 0.8586 |
| 11087 | D08 | 1871  | 81544  | GDPD5     | -0.0661 | 0.8587 |
| 51005 | C07 | 53416 | 23245  | ASTN2     | -0.0660 | 0.8589 |
| 11078 | E01 | 1473  | 57633  | LRRN1     | -0.0660 | 0.8589 |
| 31018 | D01 | 13046 | 1081   | CGA       | -0.0660 | 0.8590 |
| 31016 | A01 | 12776 | 64960  | MRPS15    | -0.0660 | 0.8591 |
| 31037 | G08 | 14404 | 145946 | SPATA8    | -0.0660 | 0.8591 |

|       |     |       |        |           |         |        |
|-------|-----|-------|--------|-----------|---------|--------|
| 11047 | H07 | 1712  | 11012  | KLK11     | -0.0660 | 0.8591 |
| 11046 | B01 | 1968  | 79817  | MOBKL2B   | -0.0659 | 0.8592 |
| 51010 | D11 | 54273 | 286148 | DPY19L4   | -0.0659 | 0.8592 |
| 11030 | G03 | 3156  | 5111   | PCNA      | -0.0659 | 0.8592 |
| 11081 | E04 | 2165  | NA     | NA        | -0.0659 | 0.8592 |
| 51015 | D05 | 52888 | 57484  | RNF150    | -0.0658 | 0.8594 |
| 11081 | H07 | 8138  | 55478  | PRO2012   | -0.0658 | 0.8594 |
| 11030 | E08 | 3247  | 10099  | TSPAN3    | -0.0658 | 0.8595 |
| 31012 | B10 | 12302 | 64288  | ZNF323    | -0.0657 | 0.8595 |
| 11028 | F09 | 6438  | 4711   | NDUFB5    | -0.0657 | 0.8596 |
| 11007 | F11 | 3483  | 2992   | GYG1      | -0.0657 | 0.8597 |
| 11037 | E06 | 6922  | 65078  | RTN4R     | -0.0656 | 0.8598 |
| 11041 | F01 | 2133  | 119369 | NUDT9P1   | -0.0656 | 0.8599 |
| 31040 | A10 | 8313  | 5313   | PKLR      | -0.0655 | 0.8599 |
| 51033 | F03 | 56455 | NA     | NA        | -0.0655 | 0.8600 |
| 11012 | H08 | 3649  | 51493  | C22orf28  | -0.0655 | 0.8600 |
| 11021 | E02 | 5996  | 10555  | AGPAT2    | -0.0655 | 0.8601 |
| 11009 | G08 | 2692  | 3301   | DNAJA1    | -0.0655 | 0.8601 |
| 11028 | G02 | 666   | 1317   | SLC31A1   | -0.0654 | 0.8601 |
| 31001 | D04 | 10488 | 8738   | CRADD     | -0.0654 | 0.8601 |
| 31018 | D10 | 13285 | NA     | NA        | -0.0654 | 0.8602 |
| 11061 | G02 | 3813  | 80199  | FUZ       | -0.0654 | 0.8603 |
| 11059 | A01 | 8789  | 51290  | ERGIC2    | -0.0654 | 0.8603 |
| 11028 | D11 | 3553  | 252839 | TMEM9     | -0.0653 | 0.8603 |
| 11047 | D03 | 3747  | 7462   | LAT2      | -0.0653 | 0.8603 |
| 51013 | B07 | 52916 | 4303   | FOXO4     | -0.0653 | 0.8604 |
| 11007 | F10 | 3996  | 8894   | EIF2S2    | -0.0653 | 0.8604 |
| 11003 | D04 | 5637  | 6759   | SSX4      | -0.0652 | 0.8605 |
| 11007 | E03 | 4172  | 7965   | AIMP2     | -0.0651 | 0.8608 |
| 11072 | C03 | 8198  | 131566 | DCBLD2    | -0.0651 | 0.8608 |
| 11040 | D06 | 4920  | 1163   | CKS1B     | -0.0650 | 0.8609 |
| 11014 | B12 | 3105  | 3703   | STT3A     | -0.0650 | 0.8611 |
| 11061 | B05 | 751   | 79716  | NPEPL1    | -0.0650 | 0.8611 |
| 51005 | F09 | 53642 | 28983  | TMPRSS11E | -0.0650 | 0.8611 |
| 31020 | D01 | 13127 | 7993   | UBXN8     | -0.0650 | 0.8611 |
| 11059 | A09 | 6720  | 4704   | NDUFA9    | -0.0649 | 0.8611 |
| 31040 | G07 | 9456  | 64926  | RASAL3    | -0.0649 | 0.8612 |
| 11061 | A06 | 8225  | 64798  | DEPDC6    | -0.0649 | 0.8612 |
| 31042 | B08 | 6406  | 11155  | LDB3      | -0.0649 | 0.8613 |
| 31036 | B04 | 11136 | 114879 | OSBPL5    | -0.0649 | 0.8613 |
| 11081 | H05 | 9150  | 85480  | TSLP      | -0.0649 | 0.8613 |
| 31006 | E06 | 11177 | 83594  | NUDT12    | -0.0648 | 0.8614 |
| 31020 | F07 | 12986 | 8630   | HSD17B6   | -0.0647 | 0.8616 |
| 11043 | B04 | 5492  | 94101  | ORMDL1    | -0.0647 | 0.8616 |

|       |     |       |        |          |         |        |
|-------|-----|-------|--------|----------|---------|--------|
| 11075 | D08 | 1202  | 9308   | CD83     | -0.0646 | 0.8617 |
| 31040 | H02 | 2337  | 114826 | SMYD4    | -0.0646 | 0.8617 |
| 51030 | B10 | 55679 | NA     | NA       | -0.0646 | 0.8618 |
| 11021 | H08 | 4710  | 5571   | PRKAG1   | -0.0646 | 0.8618 |
| 11051 | H05 | 6196  | 23475  | QPRT     | -0.0645 | 0.8619 |
| 31019 | B08 | 13108 | 51338  | MS4A4A   | -0.0645 | 0.8619 |
| 31043 | H04 | 7488  | 9317   | PTER     | -0.0645 | 0.8620 |
| 31006 | F12 | 10900 | 136895 | C7orf31  | -0.0645 | 0.8621 |
| 51012 | E08 | 52758 | 126375 | ZNF792   | -0.0644 | 0.8621 |
| 51012 | H09 | 53034 | 55070  | DET1     | -0.0644 | 0.8622 |
| 11008 | G01 | 2982  | 57604  | C8orf79  | -0.0644 | 0.8622 |
| 51026 | B11 | 55495 | 55259  | CASC1    | -0.0644 | 0.8622 |
| 11040 | F11 | 8908  | 51447  | IP6K2    | -0.0644 | 0.8622 |
| 11080 | C04 | 1531  | 9271   | PIWIL1   | -0.0644 | 0.8622 |
| 11057 | D01 | 3945  | 5913   | RAPSN    | -0.0643 | 0.8623 |
| 11045 | A04 | 8512  | 9570   | GOSR2    | -0.0643 | 0.8623 |
| 51013 | C04 | 55113 | 137902 | PXDNL    | -0.0643 | 0.8625 |
| 11070 | C10 | 9963  | 80230  | RUFY1    | -0.0642 | 0.8625 |
| 51026 | H07 | 55578 | 119587 | CPXM2    | -0.0642 | 0.8625 |
| 51012 | D04 | 55036 | 731    | C8A      | -0.0642 | 0.8626 |
| 11021 | E04 | 3300  | 84264  | HAGHL    | -0.0641 | 0.8627 |
| 11072 | G09 | 3635  | 26167  | PCDHB5   | -0.0641 | 0.8629 |
| 51005 | H03 | 54448 | 30813  | VSX1     | -0.0640 | 0.8629 |
| 11073 | D07 | 4842  | 55333  | SYNJ2BP  | -0.0640 | 0.8630 |
| 11075 | D06 | 1677  | 1036   | CDO1     | -0.0640 | 0.8631 |
| 11049 | G02 | 2577  | 23760  | PITPNB   | -0.0639 | 0.8631 |
| 31023 | G02 | 13676 | 79829  | NAA40    | -0.0639 | 0.8631 |
| 31007 | G10 | 11655 | 4726   | NDUFS6   | -0.0639 | 0.8632 |
| 11074 | E12 | 4374  | 5283   | PIGH     | -0.0638 | 0.8633 |
| 51030 | B09 | 53315 | 80025  | PANK2    | -0.0638 | 0.8633 |
| 11063 | E12 | 8205  | 126626 | GABPB2   | -0.0638 | 0.8633 |
| 51011 | C01 | 52975 | 51725  | FBXO40   | -0.0638 | 0.8634 |
| 11062 | C09 | 831   | 115353 | LRRC42   | -0.0638 | 0.8634 |
| 31033 | F01 | 14697 | 81570  | CLPB     | -0.0638 | 0.8635 |
| 31003 | D08 | 10613 | 91404  | SESTD1   | -0.0637 | 0.8635 |
| 11048 | B12 | 9704  | 3122   | HLA-DRA  | -0.0637 | 0.8635 |
| 11036 | D09 | 1278  | 51412  | ACTL6B   | -0.0637 | 0.8635 |
| 11007 | F03 | 746   | 64223  | MLST8    | -0.0637 | 0.8635 |
| 31018 | B01 | 12851 | 5757   | PTMA     | -0.0637 | 0.8635 |
| 51029 | A06 | 53386 | 54662  | TBC1D13  | -0.0637 | 0.8636 |
| 11053 | A02 | 5878  | 10969  | EBNA1BP2 | -0.0637 | 0.8636 |
| 11020 | D04 | 7743  | NA     | NA       | -0.0637 | 0.8637 |
| 51031 | A12 | 55939 | 171484 | FAM9C    | -0.0636 | 0.8637 |
| 31007 | G08 | 10943 | 4798   | NFRKB    | -0.0636 | 0.8637 |

|       |     |       |        |          |         |        |
|-------|-----|-------|--------|----------|---------|--------|
| 11002 | E12 | 8218  | 8816   | DCAF5    | -0.0636 | 0.8637 |
| 51002 | F01 | 53146 | 55859  | BEX1     | -0.0636 | 0.8638 |
| 11075 | C10 | 4403  | 29965  | C16orf5  | -0.0636 | 0.8638 |
| 11009 | D07 | 6305  | 5704   | PSMC4    | -0.0635 | 0.8639 |
| 11088 | A04 | 7251  | 4948   | OCA2     | -0.0635 | 0.8640 |
| 11050 | C05 | 2380  | 3856   | KRT8     | -0.0635 | 0.8640 |
| 51029 | D09 | 53337 | 389668 | XKR9     | -0.0635 | 0.8641 |
| 51029 | C05 | 55658 | 64072  | CDH23    | -0.0634 | 0.8642 |
| 51012 | C12 | 52879 | 22938  | SNW1     | -0.0633 | 0.8643 |
| 11020 | C09 | 7253  | 115416 | C7orf30  | -0.0633 | 0.8643 |
| 11037 | D08 | 3167  | 4354   | MPP1     | -0.0633 | 0.8643 |
| 31019 | B09 | 13130 | 29080  | CCDC59   | -0.0633 | 0.8644 |
| 11038 | H06 | 1297  | 147746 | HIPK4    | -0.0633 | 0.8644 |
| 11072 | A11 | 3872  | 3792   | KEL      | -0.0632 | 0.8645 |
| 31019 | E02 | 13247 | 79848  | CSPP1    | -0.0632 | 0.8645 |
| 31042 | B12 | 5948  | 9158   | FIBP     | -0.0632 | 0.8646 |
| 31026 | A12 | 13999 | 10223  | GPA33    | -0.0632 | 0.8647 |
| 11009 | C06 | 712   | 3491   | CYR61    | -0.0631 | 0.8647 |
| 11052 | C12 | 1256  | 26249  | KLHL3    | -0.0631 | 0.8648 |
| 11070 | B10 | 10002 | 63920  | C5orf54  | -0.0631 | 0.8648 |
| 11074 | C06 | 4251  | 2512   | FTL      | -0.0630 | 0.8649 |
| 11004 | C04 | 8093  | 79634  | SCRN3    | -0.0630 | 0.8650 |
| 11003 | C08 | 9504  | 3824   | KLRD1    | -0.0630 | 0.8650 |
| 11052 | B10 | 5209  | 952    | CD38     | -0.0630 | 0.8651 |
| 11056 | F09 | 1832  | 1022   | CDK7     | -0.0629 | 0.8652 |
| 51003 | B01 | 52948 | 80111  | C3orf36  | -0.0629 | 0.8652 |
| 51006 | E10 | 56805 | 22834  | ZNF652   | -0.0629 | 0.8652 |
| 11032 | A06 | 7013  | 26579  | MYEOV    | -0.0628 | 0.8653 |
| 11038 | F08 | 5251  | 84838  | ZNF496   | -0.0628 | 0.8653 |
| 11021 | B08 | 5651  | 51778  | MYOZ2    | -0.0628 | 0.8654 |
| 51029 | B06 | 55522 | 57140  | RNPEPL1  | -0.0628 | 0.8654 |
| 51022 | D12 | 56256 | 150696 | PROM2    | -0.0627 | 0.8655 |
| 11081 | B05 | 7575  | 54065  | FAM165B  | -0.0627 | 0.8655 |
| 51033 | B11 | 53946 | 150291 | C22orf27 | -0.0627 | 0.8655 |
| 11028 | C03 | 8800  | 28227  | PPP2R3B  | -0.0627 | 0.8655 |
| 31026 | E04 | 14025 | 85397  | RGS8     | -0.0627 | 0.8655 |
| 11078 | F07 | 7174  | 9064   | MAP3K6   | -0.0627 | 0.8656 |
| 51012 | D12 | 53769 | 10576  | CCT2     | -0.0627 | 0.8657 |
| 11041 | B07 | 4356  | 84269  | CHCHD5   | -0.0626 | 0.8657 |
| 31037 | E03 | 12495 | 55144  | LRRC8D   | -0.0626 | 0.8657 |
| 51018 | D02 | 56356 | 5878   | RAB5C    | -0.0626 | 0.8657 |
| 31042 | H07 | 5282  | 84108  | PCGF6    | -0.0626 | 0.8658 |
| 11072 | F06 | 1900  | 150094 | SIK1     | -0.0626 | 0.8658 |
| 31029 | F09 | 14381 | 8675   | STX16    | -0.0626 | 0.8658 |

|       |     |       |        |          |         |        |
|-------|-----|-------|--------|----------|---------|--------|
| 31023 | C04 | 13386 | 9470   | EIF4E2   | -0.0626 | 0.8658 |
| 11049 | A01 | 6430  | 7138   | TNNT1    | -0.0625 | 0.8659 |
| 11079 | G11 | 1285  | 114790 | STK11IP  | -0.0625 | 0.8659 |
| 31041 | B10 | 3310  | 2962   | GTF2F1   | -0.0625 | 0.8659 |
| 11083 | D07 | 2754  | 22916  | NCBP2    | -0.0625 | 0.8660 |
| 11020 | H03 | 7135  | 5008   | OSM      | -0.0625 | 0.8660 |
| 11071 | H05 | 2429  | 22868  | FASTKD2  | -0.0624 | 0.8661 |
| 11003 | H09 | 1513  | 148932 | MOBKL2C  | -0.0624 | 0.8662 |
| 51018 | D05 | 55833 | 10336  | PCGF3    | -0.0624 | 0.8662 |
| 31016 | C09 | 12611 | 71     | ACTG1    | -0.0623 | 0.8663 |
| 31001 | A09 | 10529 | 127247 | ASB17    | -0.0623 | 0.8663 |
| 51010 | E11 | 52970 | 79755  | ZNF750   | -0.0622 | 0.8665 |
| 11048 | C08 | 1347  | 203328 | SUSD3    | -0.0622 | 0.8665 |
| 31032 | E06 | 14668 | 55114  | ARHGAP17 | -0.0622 | 0.8665 |
| 51024 | B12 | 53256 | 3371   | TNC      | -0.0622 | 0.8665 |
| 31018 | H06 | 12897 | 3116   | HLA-DPB2 | -0.0622 | 0.8665 |
| 31002 | F12 | 10740 | 283461 | C12orf40 | -0.0622 | 0.8666 |
| 31021 | G04 | 12843 | 9689   | BZW1     | -0.0622 | 0.8667 |
| 51009 | F11 | 53602 | 1015   | CDH17    | -0.0621 | 0.8667 |
| 11088 | G11 | 634   | 333    | APLP1    | -0.0621 | 0.8667 |
| 11085 | G06 | 5368  | 1632   | DCI      | -0.0621 | 0.8668 |
| 11070 | D09 | 421   | 2547   | XRCC6    | -0.0621 | 0.8668 |
| 31020 | C07 | 13125 | 25983  | NGDN     | -0.0621 | 0.8668 |
| 11063 | B06 | 8530  | 57037  | ANKMY2   | -0.0620 | 0.8669 |
| 11060 | H07 | 5081  | 64224  | HERPUD2  | -0.0620 | 0.8670 |
| 31027 | H07 | 13956 | 196    | AHR      | -0.0620 | 0.8670 |
| 31021 | A11 | 12914 | 7586   | ZKSCAN1  | -0.0619 | 0.8672 |
| 11021 | H04 | 3468  | 51103  | NDUFAF1  | -0.0619 | 0.8672 |
| 11060 | F07 | 8085  | 164312 | LRRN4    | -0.0618 | 0.8673 |
| 11068 | D07 | 3034  | 58155  | PTBP2    | -0.0618 | 0.8674 |
| 11028 | F08 | 5295  | 25912  | C1orf43  | -0.0618 | 0.8674 |
| 11032 | F06 | 6886  | 1891   | ECH1     | -0.0618 | 0.8674 |
| 31024 | H09 | 13573 | 26088  | GGA1     | -0.0618 | 0.8674 |
| 51009 | A12 | 54253 | 2533   | FYB      | -0.0618 | 0.8674 |
| 11072 | F08 | 7930  | 5214   | PFKP     | -0.0618 | 0.8674 |
| 11043 | E10 | 607   | 1072   | CFL1     | -0.0617 | 0.8675 |
| 11045 | H07 | 4478  | 5862   | RAB2A    | -0.0617 | 0.8676 |
| 11074 | D01 | 2499  | 3600   | IL15     | -0.0617 | 0.8676 |
| 31002 | E03 | 10268 | 148327 | CREB3L4  | -0.0616 | 0.8677 |
| 11056 | E03 | 565   | 622    | BDH1     | -0.0616 | 0.8677 |
| 51022 | H09 | 56162 | 64145  | ZFYVE20  | -0.0616 | 0.8678 |
| 11070 | C04 | 2967  | 65082  | VPS33A   | -0.0616 | 0.8678 |
| 51008 | G09 | 56352 | 23005  | MAPKBP1  | -0.0616 | 0.8678 |
| 11057 | A04 | 4949  | 55662  | HIF1AN   | -0.0615 | 0.8679 |



|       |     |       |        |           |         |        |
|-------|-----|-------|--------|-----------|---------|--------|
| 31024 | D11 | 13460 | 64421  | DCLRE1C   | -0.0615 | 0.8679 |
| 11045 | A08 | 2964  | 8763   | CD164     | -0.0614 | 0.8682 |
| 31021 | B09 | 13274 | 2923   | PDIA3     | -0.0613 | 0.8683 |
| 51020 | B10 | 56605 | 26048  | ZNF500    | -0.0613 | 0.8683 |
| 11043 | E08 | 5757  | 5478   | PPIA      | -0.0613 | 0.8683 |
| 31006 | B09 | 11214 | 200558 | APLF      | -0.0613 | 0.8684 |
| 31020 | E12 | 13060 | 1880   | GPR183    | -0.0613 | 0.8684 |
| 11026 | D05 | 5992  | 51042  | ZNF593    | -0.0613 | 0.8684 |
| 11088 | C07 | 1818  | 9750   | FAM65B    | -0.0612 | 0.8685 |
| 51017 | B02 | 56135 | 255167 | LOC255167 | -0.0612 | 0.8685 |
| 11036 | F02 | 3307  | 51295  | ECSIT     | -0.0612 | 0.8686 |
| 11081 | F01 | 8873  | 57647  | DHX37     | -0.0612 | 0.8686 |
| 11020 | F09 | 5143  | 4188   | MDFI      | -0.0612 | 0.8686 |
| 11042 | D01 | 9109  | 93099  | DMKN      | -0.0612 | 0.8686 |
| 11053 | G07 | 5465  | 54780  | NSMCE4A   | -0.0612 | 0.8686 |
| 11060 | C01 | 3956  | 84766  | EFCAB4B   | -0.0611 | 0.8687 |
| 11058 | H07 | 8617  | 54843  | SYTL2     | -0.0611 | 0.8687 |
| 31006 | C04 | 11195 | 6344   | SCTR      | -0.0611 | 0.8688 |
| 31041 | E09 | 4669  | 39     | ACAT2     | -0.0611 | 0.8688 |
| 51024 | C07 | 55196 | 57520  | HECW2     | -0.0611 | 0.8688 |
| 31017 | C04 | 12550 | 8877   | SPHK1     | -0.0611 | 0.8688 |
| 51004 | F12 | 53836 | 8789   | FBP2      | -0.0610 | 0.8689 |
| 11084 | A07 | 3629  | 51260  | CXorf26   | -0.0610 | 0.8689 |
| 11015 | D07 | 5530  | 521    | ATP5I     | -0.0610 | 0.8689 |
| 11041 | C03 | 2204  | 256302 | C17orf103 | -0.0610 | 0.8689 |
| 11021 | H03 | 8024  | 10049  | DNAJB6    | -0.0610 | 0.8689 |
| 31016 | D01 | 12618 | 80178  | C16orf59  | -0.0610 | 0.8690 |
| 51029 | G10 | 56554 | 140680 | C20orf96  | -0.0610 | 0.8690 |
| 11070 | C11 | 6248  | 83858  | ATAD3B    | -0.0610 | 0.8690 |
| 11024 | A09 | 4846  | 10127  | ZNF263    | -0.0610 | 0.8691 |
| 51014 | G02 | 52715 | 114789 | SLC25A25  | -0.0609 | 0.8691 |
| 11084 | H04 | 9043  | 9260   | PDLIM7    | -0.0609 | 0.8692 |
| 11041 | F03 | 5557  | 25906  | C11orf51  | -0.0609 | 0.8692 |
| 11070 | D12 | 10042 | 11143  | MYST2     | -0.0609 | 0.8692 |
| 11078 | E05 | 6193  | 55131  | RBM28     | -0.0609 | 0.8692 |
| 31041 | B05 | 7160  | 55336  | FBXL8     | -0.0609 | 0.8692 |
| 11085 | C04 | 7382  | 221294 | NT5DC1    | -0.0608 | 0.8693 |
| 51003 | E07 | 55641 | 430    | ASCL2     | -0.0608 | 0.8693 |
| 31033 | G07 | 14938 | 541473 | LOC541473 | -0.0608 | 0.8693 |
| 11038 | E10 | 5002  | 5252   | PHF1      | -0.0608 | 0.8694 |
| 51005 | C10 | 53733 | 25819  | CCRN4L    | -0.0608 | 0.8695 |
| 51034 | F10 | 53475 | 116534 | MRGPRE    | -0.0608 | 0.8695 |
| 11006 | F12 | 8239  | 161003 | STOML3    | -0.0608 | 0.8695 |
| 31026 | E06 | 13842 | 3024   | HIST1H1A  | -0.0607 | 0.8695 |

|       |     |       |        |           |         |        |
|-------|-----|-------|--------|-----------|---------|--------|
| 31003 | F06 | 10458 | 3750   | KCND1     | -0.0607 | 0.8695 |
| 11026 | F10 | 718   | 9141   | PDCD5     | -0.0607 | 0.8696 |
| 11029 | D08 | 3671  | 78986  | DUSP26    | -0.0607 | 0.8696 |
| 51004 | C03 | 52911 | 147040 | KCTD11    | -0.0606 | 0.8698 |
| 51033 | A09 | 54923 | 645840 | TXNRD3IT1 | -0.0605 | 0.8699 |
| 11051 | F04 | 226   | 1468   | SLC25A10  | -0.0605 | 0.8699 |
| 11046 | G08 | 1367  | 83853  | ROPN1L    | -0.0605 | 0.8699 |
| 11015 | G01 | 5640  | 51065  | RPS27L    | -0.0605 | 0.8700 |
| 31017 | D08 | 13231 | 10200  | MPHOSPH6  | -0.0604 | 0.8701 |
| 11080 | F01 | 7684  | 6195   | RPS6KA1   | -0.0604 | 0.8701 |
| 11001 | C05 | 8828  | 78990  | OTUB2     | -0.0604 | 0.8702 |
| 11087 | E10 | 9454  | 22918  | CD93      | -0.0604 | 0.8702 |
| 51025 | B06 | 56492 | 23371  | TENC1     | -0.0603 | 0.8703 |
| 51003 | E09 | 52946 | 284013 | VMO1      | -0.0603 | 0.8704 |
| 11024 | F01 | 3376  | 51780  | KDM3B     | -0.0603 | 0.8704 |
| 11036 | H10 | 5347  | 347733 | TUBB2B    | -0.0603 | 0.8704 |
| 31003 | B08 | 10609 | 23385  | NCSTN     | -0.0603 | 0.8704 |
| 51013 | D05 | 52912 | 3746   | KCNC1     | -0.0603 | 0.8704 |
| 11013 | H01 | 6803  | 55249  | YY1AP1    | -0.0602 | 0.8705 |
| 11072 | E08 | 2421  | 5859   | QARS      | -0.0601 | 0.8708 |
| 51002 | B04 | 54943 | 255349 | TMEM211   | -0.0601 | 0.8708 |
| 51033 | A01 | 55476 | 440193 | CCDC88C   | -0.0600 | 0.8709 |
| 51029 | A04 | 55488 | 154    | ADRB2     | -0.0600 | 0.8709 |
| 11040 | G11 | 4586  | 7341   | SUMO1     | -0.0600 | 0.8709 |
| 51012 | E03 | 54814 | 415    | ARSE      | -0.0600 | 0.8709 |
| 51005 | C06 | 55055 | 340156 | MYLK4     | -0.0600 | 0.8709 |
| 51014 | F05 | 52938 | 7166   | TPH1      | -0.0600 | 0.8710 |
| 11085 | D01 | 3199  | 54859  | C3orf75   | -0.0599 | 0.8711 |
| 11030 | A05 | 6284  | 55777  | MBD5      | -0.0599 | 0.8711 |
| 11049 | B02 | 6587  | 56984  | PSMG2     | -0.0599 | 0.8711 |
| 11021 | C12 | 5891  | 5699   | PSMB10    | -0.0599 | 0.8712 |
| 11072 | F09 | 2191  | 6832   | SUPV3L1   | -0.0599 | 0.8712 |
| 51003 | A08 | 52632 | 27240  | SIT1      | -0.0598 | 0.8713 |
| 11058 | G07 | 5115  | 4778   | NFE2      | -0.0598 | 0.8714 |
| 11063 | C08 | 843   | 10329  | TMEM5     | -0.0598 | 0.8714 |
| 11049 | B09 | 3078  | 4869   | NPM1      | -0.0597 | 0.8715 |
| 11074 | B11 | 9029  | 90933  | TRIM41    | -0.0597 | 0.8717 |
| 31017 | E05 | 12534 | 80004  | ESRP2     | -0.0596 | 0.8717 |
| 11038 | A06 | 5575  | 65251  | ZNF649    | -0.0596 | 0.8718 |
| 11039 | H05 | 1860  | 285782 | CAGE1     | -0.0596 | 0.8718 |
| 11035 | B10 | 1352  | 29122  | PRSS50    | -0.0595 | 0.8720 |
| 11029 | A07 | 7945  | 8407   | TAGLN2    | -0.0595 | 0.8721 |
| 11070 | F03 | 7609  | 89941  | RHOT2     | -0.0594 | 0.8722 |
| 11017 | F09 | 7834  | 51121  | RPL26L1   | -0.0594 | 0.8722 |

|       |     |       |        |          |         |        |
|-------|-----|-------|--------|----------|---------|--------|
| 51006 | E09 | 53764 | 51341  | ZBTB7A   | -0.0593 | 0.8723 |
| 31027 | F03 | 13957 | 4010   | LMX1B    | -0.0593 | 0.8724 |
| 31030 | A07 | 14267 | 267002 | PGBD2    | -0.0593 | 0.8724 |
| 11081 | C01 | 8752  | 57804  | POLD4    | -0.0593 | 0.8724 |
| 31029 | H09 | 14325 | 117195 | MRGPRX3  | -0.0592 | 0.8725 |
| 31018 | E06 | 12967 | 128346 | C1orf162 | -0.0592 | 0.8725 |
| 11008 | F10 | 356   | 1525   | CXADR    | -0.0592 | 0.8725 |
| 11078 | F11 | 6151  | 3091   | HIF1A    | -0.0592 | 0.8725 |
| 51009 | G09 | 55045 | 84905  | ZNF341   | -0.0592 | 0.8726 |
| 11007 | H07 | 4917  | 79143  | MBOAT7   | -0.0592 | 0.8726 |
| 11055 | F04 | 4419  | 65258  | MPPE1    | -0.0591 | 0.8727 |
| 51025 | A04 | 56338 | 23240  | KIAA0922 | -0.0591 | 0.8728 |
| 11022 | B07 | 7603  | 5527   | PPP2R5C  | -0.0591 | 0.8728 |
| 31015 | E05 | 12557 | 10467  | ZNHIT1   | -0.0591 | 0.8729 |
| 11025 | G08 | 2329  | 23065  | KIAA0090 | -0.0590 | 0.8729 |
| 11014 | G07 | 2947  | 57614  | KIAA1468 | -0.0590 | 0.8729 |
| 11075 | H08 | 4786  | 55093  | WDYHV1   | -0.0590 | 0.8730 |
| 11015 | E09 | 6227  | 2785   | GNG3     | -0.0590 | 0.8730 |
| 11043 | C07 | 6363  | 6392   | SDHD     | -0.0589 | 0.8731 |
| 11044 | A11 | 287   | 597    | BCL2A1   | -0.0589 | 0.8732 |
| 11037 | H01 | 5960  | 5547   | PRCP     | -0.0588 | 0.8733 |
| 51008 | D04 | 55373 | 25894  | PLEKHG4  | -0.0588 | 0.8733 |
| 31011 | B02 | 11364 | 83857  | TMTC1    | -0.0588 | 0.8734 |
| 11048 | A12 | 9031  | 7253   | TSHR     | -0.0588 | 0.8734 |
| 31018 | F07 | 13186 | 10200  | MPHOSPH6 | -0.0588 | 0.8735 |
| 11037 | H04 | 5556  | 9499   | MYOT     | -0.0588 | 0.8735 |
| 51020 | E04 | 56585 | 1159   | CKMT1B   | -0.0587 | 0.8736 |
| 31016 | B03 | 12593 | 432    | ASGR1    | -0.0586 | 0.8737 |
| 11077 | G10 | 1939  | 56903  | PAPOLB   | -0.0586 | 0.8737 |
| 11042 | A11 | 2484  | 54954  | FAM120C  | -0.0586 | 0.8739 |
| 11053 | B11 | 4297  | 80764  | THAP7    | -0.0585 | 0.8739 |
| 31022 | E04 | 13495 | 9113   | LATS1    | -0.0585 | 0.8739 |
| 11082 | B10 | 4665  | 11224  | RPL35    | -0.0585 | 0.8740 |
| 11061 | E08 | 4596  | 842    | CASP9    | -0.0584 | 0.8741 |
| 31025 | B04 | 13714 | 10444  | ZER1     | -0.0584 | 0.8742 |
| 11015 | G08 | 5680  | 23676  | SMPX     | -0.0584 | 0.8742 |
| 51021 | E11 | 55900 | 752    | FMNL1    | -0.0584 | 0.8742 |
| 11085 | D07 | 8344  | 199870 | FAM76A   | -0.0583 | 0.8743 |
| 31029 | G04 | 14358 | 153769 | SH3RF2   | -0.0583 | 0.8743 |
| 11003 | G08 | 1387  | 113177 | IZUMO4   | -0.0583 | 0.8744 |
| 11080 | G10 | 2597  | 9600   | PITPNM1  | -0.0583 | 0.8744 |
| 31005 | G04 | 11300 | 9452   | ITM2A    | -0.0583 | 0.8744 |
| 11072 | D09 | 1633  | 79838  | TMC5     | -0.0583 | 0.8744 |
| 11009 | H06 | 3745  | 5778   | PTPN7    | -0.0582 | 0.8746 |

|       |     |       |        |            |         |        |
|-------|-----|-------|--------|------------|---------|--------|
| 11080 | F02 | 5281  | 57325  | CSRP2BP    | -0.0582 | 0.8747 |
| 11007 | D07 | 6017  | 78992  | YIPF2      | -0.0581 | 0.8747 |
| 51004 | A09 | 53894 | 6799   | SULT1A2    | -0.0581 | 0.8747 |
| 11066 | G01 | 2402  | 54834  | GDAP2      | -0.0581 | 0.8748 |
| 31003 | H10 | 10471 | 7090   | TLE3       | -0.0581 | 0.8748 |
| 31009 | G05 | 11724 | 51321  | AMZ2       | -0.0581 | 0.8748 |
| 51028 | B03 | 55891 | 41     | ACCN2      | -0.0580 | 0.8749 |
| 11074 | B03 | 4312  | 740    | MRPL49     | -0.0580 | 0.8749 |
| 31022 | F05 | 13518 | 1474   | CST6       | -0.0580 | 0.8749 |
| 31042 | E08 | 5218  | 275    | AMT        | -0.0580 | 0.8750 |
| 51033 | D02 | 10391 | 399668 | NCRNA00086 | -0.0580 | 0.8750 |
| 11081 | F04 | 3351  | 54543  | TOMM7      | -0.0580 | 0.8751 |
| 51009 | B10 | 52949 | 347240 | KIF24      | -0.0579 | 0.8751 |
| 51009 | B05 | 53631 | 22870  | PPP6R1     | -0.0579 | 0.8751 |
| 11013 | B05 | 2029  | 64396  | GMCL1L     | -0.0579 | 0.8752 |
| 11008 | C06 | 172   | 8812   | CCNK       | -0.0579 | 0.8752 |
| 51026 | E06 | 56820 | 3694   | ITGB6      | -0.0579 | 0.8753 |
| 51006 | B08 | 54862 | 286887 | KRT6C      | -0.0578 | 0.8753 |
| 11067 | C12 | 2464  | 54407  | SLC38A2    | -0.0578 | 0.8753 |
| 11079 | A05 | 7650  | 4126   | MANBA      | -0.0578 | 0.8753 |
| 11044 | E07 | 711   | 126282 | TNFAIP8L1  | -0.0578 | 0.8754 |
| 11032 | H04 | 9278  | 29060  | HSPC047    | -0.0578 | 0.8754 |
| 11044 | F12 | 570   | 10016  | PDCD6      | -0.0578 | 0.8754 |
| 11064 | H11 | 7321  | 3500   | IGHG1      | -0.0578 | 0.8754 |
| 31015 | G10 | 12596 | NA     | NA         | -0.0578 | 0.8754 |
| 31036 | B01 | 10377 | 5209   | PFKFB3     | -0.0578 | 0.8755 |
| 11016 | D01 | 7550  | 51234  | TMEM85     | -0.0577 | 0.8756 |
| 31014 | C11 | 11878 | 4099   | MAG        | -0.0577 | 0.8756 |
| 11007 | E01 | 3865  | 328    | APEX1      | -0.0577 | 0.8757 |
| 11028 | H10 | 5367  | 29089  | UBE2T      | -0.0577 | 0.8757 |
| 11020 | F01 | 7521  | 54602  | NDFIP2     | -0.0576 | 0.8757 |
| 31017 | B12 | 13095 | 51751  | HIGD1B     | -0.0576 | 0.8757 |
| 11051 | G06 | 6517  | 11282  | MGAT4B     | -0.0576 | 0.8757 |
| 11072 | A07 | 2534  | 23154  | NCDN       | -0.0576 | 0.8757 |
| 31029 | F04 | 14283 | 23383  | KIAA0892   | -0.0576 | 0.8758 |
| 51029 | H01 | 55391 | 8780   | RIOK3      | -0.0575 | 0.8759 |
| 51035 | E01 | 53625 | 171482 | FAM9A      | -0.0575 | 0.8759 |
| 31004 | F10 | 11266 | 56674  | TMEM9B     | -0.0575 | 0.8759 |
| 31006 | E03 | 11098 | 151056 | PLB1       | -0.0575 | 0.8759 |
| 51020 | D10 | 56358 | 1796   | DOK1       | -0.0575 | 0.8760 |
| 51020 | G10 | 56811 | 10307  | APBB3      | -0.0575 | 0.8760 |
| 11006 | A12 | 2284  | 253260 | RICTOR     | -0.0575 | 0.8760 |
| 11088 | D01 | 10041 | 567    | B2M        | -0.0575 | 0.8761 |
| 11028 | H01 | 9042  | 79054  | TRPM8      | -0.0574 | 0.8761 |

|       |     |       |        |           |         |        |
|-------|-----|-------|--------|-----------|---------|--------|
| 51024 | E11 | 55203 | 2335   | FN1       | -0.0574 | 0.8761 |
| 11038 | G08 | 2068  | 2894   | GRID1     | -0.0574 | 0.8762 |
| 51020 | D09 | 56583 | 55315  | SLC29A3   | -0.0574 | 0.8763 |
| 11089 | E04 | 1745  | 284083 | C17orf47  | -0.0573 | 0.8763 |
| 31005 | F01 | 11167 | 286343 | C9orf150  | -0.0573 | 0.8764 |
| 11083 | E11 | 6453  | 1448   | CSN3      | -0.0573 | 0.8764 |
| 11077 | E03 | 1640  | 11311  | VPS45     | -0.0573 | 0.8764 |
| 11080 | G04 | 8367  | 558    | AXL       | -0.0573 | 0.8765 |
| 51013 | H10 | 53524 | 342945 | ZSCAN22   | -0.0572 | 0.8765 |
| 51008 | B06 | 54233 | 25     | ABL1      | -0.0572 | 0.8765 |
| 31031 | E04 | 14585 | 55801  | IL26      | -0.0572 | 0.8766 |
| 31025 | G11 | 13853 | 83955  | NACAP1    | -0.0572 | 0.8766 |
| 11008 | C05 | 8578  | 55388  | MCM10     | -0.0572 | 0.8767 |
| 11078 | D09 | 1948  | 56478  | EIF4ENIF1 | -0.0572 | 0.8767 |
| 31004 | F07 | 10904 | 4815   | NINJ2     | -0.0571 | 0.8767 |
| 11067 | C01 | 897   | 6729   | SRP54     | -0.0571 | 0.8767 |
| 51014 | C12 | 52800 | 10150  | MBNL2     | -0.0571 | 0.8768 |
| 51033 | G06 | 54801 | 9560   | CCL4L1    | -0.0571 | 0.8768 |
| 31009 | A04 | 11714 | 79228  | THOC6     | -0.0571 | 0.8768 |
| 11043 | B01 | 4792  | 9536   | PTGES     | -0.0571 | 0.8768 |
| 11020 | D02 | 5322  | 55365  | TMEM176A  | -0.0571 | 0.8769 |
| 51013 | C09 | 53962 | 117    | ADCYAP1R1 | -0.0571 | 0.8769 |
| 11017 | D04 | 5453  | 51227  | PIGP      | -0.0570 | 0.8769 |
| 51027 | E04 | 56840 | 56987  | BBX       | -0.0570 | 0.8769 |
| 11043 | B02 | 8738  | 54581  | SCAND2    | -0.0570 | 0.8770 |
| 11025 | F12 | 4666  | 9343   | EFTUD2    | -0.0570 | 0.8770 |
| 11035 | F08 | 3289  | 51280  | GOLM1     | -0.0570 | 0.8770 |
| 51026 | H11 | 56683 | 9911   | TMCC2     | -0.0570 | 0.8771 |
| 11035 | D09 | 6347  | 55003  | PAK11P1   | -0.0570 | 0.8771 |
| 51013 | E09 | 54062 | 129807 | NEU4      | -0.0569 | 0.8771 |
| 11017 | B06 | 7402  | 54586  | C9orf11   | -0.0569 | 0.8771 |
| 11064 | F08 | 5631  | 10146  | G3BP1     | -0.0569 | 0.8772 |
| 51012 | H08 | 52792 | 345193 | LRIT3     | -0.0569 | 0.8772 |
| 31031 | B03 | 14576 | 3578   | IL9       | -0.0569 | 0.8772 |
| 11062 | G09 | 4897  | 5316   | PKNOX1    | -0.0569 | 0.8773 |
| 11070 | E04 | 3006  | 6850   | SYK       | -0.0569 | 0.8773 |
| 11045 | D03 | 4856  | 6004   | RGS16     | -0.0569 | 0.8773 |
| 51031 | F08 | 56739 | 255180 | FLJ38723  | -0.0568 | 0.8774 |
| 11035 | A12 | 6608  | 84173  | ELMOD3    | -0.0568 | 0.8775 |
| 11039 | E07 | 1551  | 5519   | PPP2R1B   | -0.0567 | 0.8776 |
| 31031 | G08 | 14586 | 3593   | IL12B     | -0.0567 | 0.8776 |
| 31024 | E12 | 13446 | 81533  | ITFG1     | -0.0567 | 0.8776 |
| 11012 | F05 | 4545  | 56658  | TRIM39    | -0.0567 | 0.8777 |
| 11037 | G09 | 4714  | 10425  | ARIH2     | -0.0567 | 0.8777 |

|       |     |       |        |              |         |        |
|-------|-----|-------|--------|--------------|---------|--------|
| 31001 | G09 | 10734 | 196951 | C15orf33     | -0.0566 | 0.8777 |
| 51024 | H07 | 55209 | 4040   | LRP6         | -0.0566 | 0.8777 |
| 51021 | F04 | 56182 | 91056  | DKFZp761E198 | -0.0566 | 0.8777 |
| 51006 | F04 | 56841 | 81602  | CDADC1       | -0.0566 | 0.8778 |
| 11057 | D06 | 9382  | 200942 | KLHDC8B      | -0.0566 | 0.8778 |
| 11049 | H10 | 2010  | 54664  | TMEM106B     | -0.0566 | 0.8778 |
| 31019 | E05 | 13158 | 5617   | PRL          | -0.0565 | 0.8779 |
| 11079 | B01 | 7049  | 23214  | XPO6         | -0.0565 | 0.8779 |
| 31014 | C09 | 12017 | 1808   | DPYSL2       | -0.0565 | 0.8780 |
| 31022 | C10 | 13633 | 554223 | LOC554223    | -0.0565 | 0.8780 |
| 11071 | D07 | 9838  | 84643  | KIF2B        | -0.0565 | 0.8780 |
| 11082 | H01 | 8735  | 4286   | MITF         | -0.0565 | 0.8780 |
| 51005 | E02 | 55048 | 343263 | MYBPHL       | -0.0565 | 0.8780 |
| 11037 | F09 | 3297  | 158    | ADSL         | -0.0565 | 0.8781 |
| 11070 | D02 | 669   | 5743   | PTGS2        | -0.0564 | 0.8781 |
| 11056 | H10 | 8610  | 55127  | HEATR1       | -0.0564 | 0.8781 |
| 11035 | E12 | 9102  | 9869   | SETDB1       | -0.0564 | 0.8781 |
| 11076 | A11 | 3947  | 4329   | ALDH6A1      | -0.0564 | 0.8782 |
| 11045 | G08 | 4279  | 84733  | CBX2         | -0.0564 | 0.8783 |
| 31041 | D06 | 6144  | 1503   | CTPS         | -0.0563 | 0.8784 |
| 51013 | F02 | 52718 | 112802 | KRT71        | -0.0563 | 0.8784 |
| 11042 | B08 | 1951  | 196549 | EEF1DP3      | -0.0563 | 0.8784 |
| 31007 | D08 | 10827 | 23287  | AGTPBP1      | -0.0563 | 0.8785 |
| 11045 | D02 | 4790  | 11007  | CCDC85B      | -0.0563 | 0.8785 |
| 51035 | D10 | 54741 | 3188   | HNRNPH2      | -0.0562 | 0.8785 |
| 11024 | C02 | 8458  | 4600   | MX2          | -0.0562 | 0.8786 |
| 11001 | H11 | 3099  | 119504 | ANAPC16      | -0.0562 | 0.8786 |
| 31002 | C01 | 10790 | 54361  | WNT4         | -0.0562 | 0.8787 |
| 51001 | C02 | 54444 | 246705 | C21orf94     | -0.0562 | 0.8787 |
| 11088 | D05 | 8335  | 7130   | TNFAIP6      | -0.0562 | 0.8787 |
| 11051 | F08 | 3027  | 10560  | SLC19A2      | -0.0561 | 0.8787 |
| 11016 | F10 | 5623  | 79017  | GGCT         | -0.0561 | 0.8788 |
| 51012 | B10 | 53723 | 3784   | KCNQ1        | -0.0561 | 0.8788 |
| 11079 | E12 | 3898  | 7917   | BAT3         | -0.0561 | 0.8788 |
| 31027 | F06 | 13953 | 126410 | CYP4F22      | -0.0561 | 0.8788 |
| 11051 | D06 | 5460  | 51256  | TBC1D7       | -0.0561 | 0.8789 |
| 11035 | E04 | 6602  | 79603  | LASS4        | -0.0561 | 0.8789 |
| 11077 | A03 | 4870  | 3853   | KRT6A        | -0.0560 | 0.8790 |
| 11050 | E08 | 1020  | 259282 | BOD1L        | -0.0560 | 0.8790 |
| 11055 | B08 | 1578  | 57088  | PLSCR4       | -0.0560 | 0.8790 |
| 31022 | C02 | 13341 | 8364   | HIST1H4C     | -0.0560 | 0.8790 |
| 31022 | H11 | 13534 | 1839   | HBEGF        | -0.0560 | 0.8790 |
| 11012 | F11 | 3900  | 3790   | KCNS3        | -0.0560 | 0.8790 |
| 11020 | G06 | 8927  | 29781  | NCAPH2       | -0.0560 | 0.8791 |

|       |     |       |        |           |         |        |
|-------|-----|-------|--------|-----------|---------|--------|
| 11006 | A11 | 9817  | 766    | CA7       | -0.0560 | 0.8791 |
| 51010 | E06 | 54340 | 272    | AMPD3     | -0.0560 | 0.8791 |
| 11049 | E06 | 3925  | 54974  | THG1L     | -0.0559 | 0.8791 |
| 31002 | D03 | 10686 | 84072  | HORMAD1   | -0.0559 | 0.8792 |
| 31023 | C07 | 13524 | 283229 | EFCAB4A   | -0.0559 | 0.8792 |
| 51033 | H10 | 54106 | 145757 | LOC145757 | -0.0559 | 0.8793 |
| 11027 | H09 | 8329  | 919    | CD247     | -0.0559 | 0.8793 |
| 11087 | E11 | 905   | 22980  | TCF25     | -0.0558 | 0.8794 |
| 11089 | E01 | 2969  | 113220 | KIF12     | -0.0558 | 0.8794 |
| 11041 | G03 | 5094  | 51025  | TIMM16    | -0.0558 | 0.8794 |
| 11002 | B08 | 9688  | 9814   | SFI1      | -0.0558 | 0.8794 |
| 31037 | D02 | 12150 | 55630  | SLC39A4   | -0.0558 | 0.8795 |
| 31025 | G02 | 13393 | 89890  | KBTBD6    | -0.0557 | 0.8796 |
| 31013 | E10 | 11982 | 10641  | NPRL2     | -0.0557 | 0.8796 |
| 31015 | E08 | 12493 | 79727  | LIN28A    | -0.0557 | 0.8797 |
| 11020 | D09 | 5617  | 7103   | TSPAN8    | -0.0557 | 0.8797 |
| 31006 | A08 | 11247 | 83875  | BCO2      | -0.0556 | 0.8798 |
| 11025 | H02 | 2539  | 84343  | HPS3      | -0.0556 | 0.8799 |
| 31036 | D08 | 12003 | 57727  | NCOA5     | -0.0556 | 0.8799 |
| 51010 | G04 | 53577 | 56137  | PCDHA12   | -0.0555 | 0.8800 |
| 11008 | F06 | 374   | 51150  | SDF4      | -0.0555 | 0.8801 |
| 31040 | D03 | 2268  | 10250  | SRRM1     | -0.0554 | 0.8802 |
| 31016 | E08 | 12681 | 5413   | SEPT5     | -0.0554 | 0.8803 |
| 11062 | E08 | 6791  | 28988  | DBNL      | -0.0554 | 0.8803 |
| 11032 | D11 | 1158  | 54886  | LPPR1     | -0.0554 | 0.8803 |
| 51027 | B06 | 55251 | 55552  | ZNF823    | -0.0554 | 0.8803 |
| 31016 | C08 | 12820 | 4733   | DRG1      | -0.0552 | 0.8807 |
| 51015 | G08 | 52846 | 10584  | COLEC10   | -0.0552 | 0.8807 |
| 11025 | G11 | 2537  | 10919  | EHMT2     | -0.0552 | 0.8807 |
| 51001 | B10 | 52626 | 150244 | ZDHHC8P1  | -0.0552 | 0.8807 |
| 31033 | A07 | 14924 | 6283   | S100A12   | -0.0551 | 0.8808 |
| 11088 | F11 | 2933  | 55515  | ACCN4     | -0.0551 | 0.8808 |
| 11004 | B04 | 9020  | 5144   | PDE4D     | -0.0551 | 0.8809 |
| 51020 | H01 | 55817 | 9394   | HS6ST1    | -0.0550 | 0.8810 |
| 11062 | H03 | 5266  | 26100  | WIPI2     | -0.0550 | 0.8811 |
| 11087 | F06 | 9267  | 147872 | CCDC155   | -0.0550 | 0.8811 |
| 11038 | F07 | 5815  | 7430   | EZR       | -0.0550 | 0.8811 |
| 11068 | G04 | 10105 | 163227 | ZNF100    | -0.0550 | 0.8811 |
| 11080 | B04 | 2934  | 55665  | URGCP     | -0.0549 | 0.8812 |
| 31002 | D07 | 10675 | 2774   | GNAL      | -0.0549 | 0.8813 |
| 11087 | H03 | 4674  | 6624   | FSCN1     | -0.0549 | 0.8813 |
| 11030 | D05 | 7932  | 51382  | ATP6V1D   | -0.0548 | 0.8814 |
| 11085 | G02 | 8533  | 56935  | C11orf75  | -0.0548 | 0.8814 |
| 11009 | G07 | 281   | 4598   | MVK       | -0.0548 | 0.8815 |

|       |     |       |        |          |         |        |
|-------|-----|-------|--------|----------|---------|--------|
| 11020 | C01 | 5665  | 9443   | MED7     | -0.0548 | 0.8815 |
| 11012 | D07 | 216   | 60313  | GPBP1L1  | -0.0548 | 0.8815 |
| 11020 | H02 | 6070  | 10653  | SPINT2   | -0.0548 | 0.8815 |
| 51004 | C02 | 52847 | 27121  | DKK4     | -0.0547 | 0.8816 |
| 11065 | G08 | 4448  | 4691   | NCL      | -0.0547 | 0.8817 |
| 31041 | D01 | 7285  | 6649   | SOD3     | -0.0547 | 0.8817 |
| 11055 | B11 | 3478  | 29086  | C19orf62 | -0.0546 | 0.8818 |
| 11059 | A11 | 3899  | 10983  | CCNI     | -0.0546 | 0.8818 |
| 31042 | C04 | 7021  | 55041  | PLEKHB2  | -0.0546 | 0.8819 |
| 31030 | C03 | 14386 | 114792 | KLHL32   | -0.0546 | 0.8819 |
| 51010 | D09 | 52987 | 1616   | DAXX     | -0.0546 | 0.8819 |
| 11079 | C04 | 6022  | 51460  | SFMBT1   | -0.0545 | 0.8820 |
| 11012 | G05 | 5916  | 84705  | GTPBP3   | -0.0545 | 0.8820 |
| 11084 | F08 | 1728  | 219654 | ZCCHC24  | -0.0545 | 0.8820 |
| 51020 | B12 | 56314 | 6913   | TBX15    | -0.0545 | 0.8821 |
| 31007 | E05 | 10843 | 81035  | COLEC12  | -0.0545 | 0.8821 |
| 31032 | E07 | 14732 | 23190  | UBXN4    | -0.0545 | 0.8821 |
| 31015 | D05 | 12448 | 6150   | MRPL23   | -0.0544 | 0.8822 |
| 31019 | G05 | 13289 | 3240   | HP       | -0.0544 | 0.8822 |
| 31031 | G11 | 14583 | 10888  | GPR83    | -0.0544 | 0.8824 |
| 11086 | D03 | 7914  | 85865  | GTPBP10  | -0.0543 | 0.8824 |
| 11009 | B05 | 7632  | 8459   | TPST2    | -0.0543 | 0.8824 |
| 31014 | H10 | 12149 | 55904  | MLL5     | -0.0543 | 0.8824 |
| 11025 | F10 | 1242  | 84067  | FAM160A2 | -0.0543 | 0.8824 |
| 51003 | H09 | 53427 | 23433  | RHOQ     | -0.0543 | 0.8825 |
| 11083 | B06 | 5096  | 7262   | PHLDA2   | -0.0543 | 0.8825 |
| 31021 | F10 | 13227 | 4747   | NEFL     | -0.0543 | 0.8825 |
| 31040 | B11 | 8769  | 259266 | ASPM     | -0.0543 | 0.8825 |
| 11039 | H01 | 1541  | 22849  | CPEB3    | -0.0543 | 0.8826 |
| 11071 | H02 | 3674  | 6749   | SSRP1    | -0.0543 | 0.8826 |
| 31019 | A04 | 13079 | 2243   | FGA      | -0.0542 | 0.8826 |
| 31015 | C05 | 12584 | 9617   | MTRF1    | -0.0542 | 0.8826 |
| 11009 | C08 | 7079  | 51614  | ERGIC3   | -0.0542 | 0.8826 |
| 11038 | D06 | 5931  | 3383   | ICAM1    | -0.0542 | 0.8826 |
| 11001 | H05 | 9356  | 55503  | TRPV6    | -0.0542 | 0.8826 |
| 11058 | C11 | 5988  | 4733   | DRG1     | -0.0542 | 0.8828 |
| 11009 | C09 | 2819  | 1116   | CHI3L1   | -0.0541 | 0.8828 |
| 51034 | G09 | 53584 | 89874  | SLC25A21 | -0.0541 | 0.8828 |
| 51023 | C01 | 56265 | 283284 | IGSF22   | -0.0541 | 0.8828 |
| 11047 | E02 | 557   | 7105   | TSPAN6   | -0.0541 | 0.8828 |
| 11027 | D06 | 4673  | 7335   | UBE2V1   | -0.0541 | 0.8828 |
| 11065 | B09 | 9231  | 158297 | FAM154A  | -0.0541 | 0.8829 |
| 11054 | D05 | 2151  | 83862  | TMEM120A | -0.0541 | 0.8829 |
| 11020 | D05 | 3621  | 975    | CD81     | -0.0541 | 0.8829 |



|       |     |       |        |          |         |        |
|-------|-----|-------|--------|----------|---------|--------|
| 31003 | F02 | 10562 | 51265  | CDKL3    | -0.0541 | 0.8829 |
| 51024 | F06 | 54158 | 9693   | RAPGEF2  | -0.0540 | 0.8830 |
| 11076 | A10 | 9215  | 10771  | ZMYND11  | -0.0540 | 0.8830 |
| 51014 | H04 | 52902 | 3812   | KIR3DL2  | -0.0540 | 0.8831 |
| 11087 | B10 | 4214  | 51322  | WAC      | -0.0540 | 0.8831 |
| 11062 | F05 | 5410  | 6794   | STK11    | -0.0540 | 0.8831 |
| 11051 | G10 | 8013  | 6810   | STX4     | -0.0540 | 0.8831 |
| 11063 | D12 | 4200  | 29116  | MYLIP    | -0.0539 | 0.8833 |
| 11077 | B05 | 2370  | 4001   | LMNB1    | -0.0539 | 0.8833 |
| 11078 | E07 | 7367  | 115704 | EVI5L    | -0.0539 | 0.8833 |
| 11021 | D04 | 5098  | 58495  | OVOL2    | -0.0538 | 0.8835 |
| 11009 | A02 | 3081  | 2769   | GNA15    | -0.0537 | 0.8837 |
| 11063 | B07 | 735   | 55890  | GPRC5C   | -0.0537 | 0.8837 |
| 11037 | H02 | 3474  | 5127   | CDK16    | -0.0537 | 0.8838 |
| 51031 | E03 | 56898 | 2215   | FCGR3B   | -0.0536 | 0.8839 |
| 11005 | G02 | 27    | 10573  | MRPL28   | -0.0536 | 0.8839 |
| 31030 | A05 | 14220 | 22832  | KIAA1009 | -0.0535 | 0.8840 |
| 51020 | A04 | 56627 | 89869  | PLCZ1    | -0.0535 | 0.8841 |
| 11044 | G04 | 5040  | 50626  | CYHR1    | -0.0535 | 0.8841 |
| 51015 | G01 | 53003 | 5009   | OTC      | -0.0535 | 0.8841 |
| 11006 | A05 | 7854  | 5692   | PSMB4    | -0.0535 | 0.8841 |
| 11001 | F03 | 9335  | 1339   | COX6A2   | -0.0535 | 0.8842 |
| 31041 | B11 | 5004  | 80207  | OPA3     | -0.0534 | 0.8842 |
| 31016 | E02 | 12696 | 124790 | HEXIM2   | -0.0534 | 0.8843 |
| 51029 | G03 | 56478 | 283685 | GOLGA6L2 | -0.0534 | 0.8844 |
| 11014 | H05 | 2971  | 84976  | DISP1    | -0.0534 | 0.8844 |
| 31029 | C09 | 14408 | 91409  | CCDC74B  | -0.0533 | 0.8845 |
| 11073 | G10 | 4426  | 27077  | B9D1     | -0.0533 | 0.8845 |
| 31041 | B08 | 6833  | 10131  | TRAP1    | -0.0533 | 0.8845 |
| 11054 | C07 | 8583  | 55773  | TBC1D23  | -0.0533 | 0.8845 |
| 51028 | A04 | 53234 | 340120 | ANKRD34B | -0.0533 | 0.8846 |
| 11059 | F01 | 9566  | 7101   | NR2E1    | -0.0533 | 0.8846 |
| 31043 | F04 | 7317  | 64319  | FBRS     | -0.0532 | 0.8846 |
| 11001 | D04 | 3109  | 9503   | XAGE1D   | -0.0532 | 0.8846 |
| 31036 | B02 | 10518 | 9534   | ZNF254   | -0.0532 | 0.8847 |
| 11032 | G08 | 6025  | 2307   | FOXS1    | -0.0532 | 0.8848 |
| 11078 | A02 | 1317  | 57144  | PAK7     | -0.0532 | 0.8848 |
| 31038 | G08 | 5865  | 2593   | GAMT     | -0.0532 | 0.8848 |
| 31024 | H01 | 13557 | 128178 | EDARADD  | -0.0531 | 0.8848 |
| 31023 | A11 | 13410 | 53834  | FGFRL1   | -0.0531 | 0.8849 |
| 31033 | B12 | 14851 | 7170   | TPM3     | -0.0531 | 0.8849 |
| 11028 | F05 | 3213  | 79017  | GGCT     | -0.0531 | 0.8850 |
| 11038 | B02 | 3685  | 96459  | FNIP1    | -0.0530 | 0.8851 |
| 51004 | F09 | 53508 | 345275 | HSD17B13 | -0.0530 | 0.8852 |

|       |     |       |        |          |         |        |
|-------|-----|-------|--------|----------|---------|--------|
| 51005 | B01 | 54023 | 4978   | OPCML    | -0.0530 | 0.8852 |
| 11024 | A03 | 3920  | 2997   | GYS1     | -0.0529 | 0.8852 |
| 31039 | F04 | 1792  | 10473  | HMGH4    | -0.0529 | 0.8852 |
| 11003 | H04 | 56    | 3146   | HMGB1    | -0.0529 | 0.8854 |
| 11081 | D12 | 9811  | 7031   | TFF1     | -0.0529 | 0.8854 |
| 51020 | E12 | 55870 | 26012  | NELF     | -0.0529 | 0.8854 |
| 11019 | E06 | 9148  | 54988  | ACSM5    | -0.0529 | 0.8854 |
| 51011 | D11 | 53106 | 23350  | SR140    | -0.0528 | 0.8854 |
| 51017 | D11 | 56598 | 65996  | MGC2752  | -0.0528 | 0.8855 |
| 11013 | G01 | 7361  | 80221  | ACSF2    | -0.0528 | 0.8855 |
| 31010 | F11 | 11784 | 63979  | FIGNL1   | -0.0528 | 0.8855 |
| 11064 | F12 | 2399  | 3664   | IRF6     | -0.0528 | 0.8856 |
| 11002 | G07 | 6164  | 3557   | IL1RN    | -0.0528 | 0.8856 |
| 11088 | E04 | 5452  | 4801   | NFYB     | -0.0528 | 0.8856 |
| 11026 | F04 | 2831  | 283232 | TMEM80   | -0.0527 | 0.8857 |
| 51001 | A08 | 55945 | 24150  | TP53TG3  | -0.0527 | 0.8857 |
| 31011 | E04 | 11804 | 23677  | SH3BP4   | -0.0527 | 0.8858 |
| 51027 | A12 | 55328 | 498    | ATP5A1   | -0.0527 | 0.8858 |
| 11043 | C02 | 5532  | 6035   | RNASE1   | -0.0526 | 0.8858 |
| 31034 | D03 | 14952 | 1366   | CLDN7    | -0.0526 | 0.8859 |
| 11013 | E02 | 894   | 117246 | FTSJ3    | -0.0526 | 0.8859 |
| 31030 | D08 | 14189 | 55095  | SAMD4B   | -0.0526 | 0.8859 |
| 11078 | C11 | 2984  | 10426  | TUBGCP3  | -0.0526 | 0.8860 |
| 51006 | H08 | 56698 | 23151  | GRAMD4   | -0.0526 | 0.8860 |
| 31042 | E04 | 6461  | 10981  | RAB32    | -0.0526 | 0.8860 |
| 31040 | H10 | 2180  | 5100   | PCDH8    | -0.0526 | 0.8860 |
| 11075 | F08 | 4245  | 55858  | TMEM165  | -0.0525 | 0.8860 |
| 11012 | D04 | 2836  | 8991   | SELENBP1 | -0.0525 | 0.8861 |
| 11008 | G04 | 5947  | 81488  | GRINL1A  | -0.0525 | 0.8861 |
| 51004 | A12 | 54572 | 338657 | CCDC84   | -0.0525 | 0.8861 |
| 11084 | C08 | 9599  | 124599 | CD300LB  | -0.0525 | 0.8862 |
| 11041 | B03 | 4202  | 55109  | AGGF1    | -0.0524 | 0.8862 |
| 11087 | B12 | 7236  | 91289  | LMF2     | -0.0524 | 0.8863 |
| 31042 | C03 | 6310  | 1161   | ERCC8    | -0.0524 | 0.8863 |
| 11046 | A04 | 2287  | 283635 | FAM177A1 | -0.0524 | 0.8864 |
| 11072 | B03 | 2949  | 1856   | DVL2     | -0.0524 | 0.8864 |
| 11057 | E07 | 9655  | 84902  | CCDC123  | -0.0524 | 0.8864 |
| 51026 | H08 | 56865 | 57631  | LRCH2    | -0.0524 | 0.8864 |
| 11085 | D12 | 2912  | 25789  | TMEM59L  | -0.0523 | 0.8865 |
| 31006 | H02 | 11073 | 259230 | SGMS1    | -0.0523 | 0.8865 |
| 11080 | A03 | 1106  | 26133  | TRPC4AP  | -0.0523 | 0.8865 |
| 11055 | B12 | 4033  | 55486  | PARL     | -0.0523 | 0.8865 |
| 31031 | B12 | 14644 | 26224  | FBXL3    | -0.0523 | 0.8866 |
| 51016 | D09 | 55980 | 285987 | DLX6AS   | -0.0523 | 0.8866 |

|       |     |       |        |           |         |        |
|-------|-----|-------|--------|-----------|---------|--------|
| 11049 | C09 | 2807  | 3125   | HLA-DRB3  | -0.0523 | 0.8866 |
| 11004 | H02 | 2972  | 113763 | C7orf29   | -0.0523 | 0.8866 |
| 11026 | H05 | 207   | 54108  | CHRAC1    | -0.0523 | 0.8866 |
| 11044 | E09 | 773   | 4833   | NME4      | -0.0522 | 0.8867 |
| 51031 | C05 | 56345 | 11076  | TPPP      | -0.0522 | 0.8867 |
| 11051 | B03 | 2841  | 90050  | FAM181A   | -0.0522 | 0.8867 |
| 31038 | E01 | 13962 | 4846   | NOS3      | -0.0522 | 0.8867 |
| 51031 | H11 | 56491 | 150135 | C21orf129 | -0.0522 | 0.8868 |
| 11004 | A12 | 9778  | 151194 | FAM119A   | -0.0521 | 0.8869 |
| 11068 | C12 | 9232  | 56000  | NXF3      | -0.0521 | 0.8870 |
| 51020 | B03 | 56591 | 25886  | POC1A     | -0.0521 | 0.8870 |
| 11064 | F06 | 4471  | 55695  | NSUN5     | -0.0521 | 0.8870 |
| 11084 | G06 | 2137  | 165721 | DNAJB8    | -0.0521 | 0.8870 |
| 11087 | E12 | 5113  | 4318   | MMP9      | -0.0520 | 0.8871 |
| 11089 | F01 | 1852  | 161829 | EXD1      | -0.0520 | 0.8872 |
| 11075 | H02 | 9034  | 10457  | GPNMB     | -0.0520 | 0.8872 |
| 31039 | H02 | 7981  | 26470  | SEZ6L2    | -0.0520 | 0.8872 |
| 11066 | B12 | 5090  | 57175  | CORO1B    | -0.0520 | 0.8872 |
| 11007 | C02 | 7541  | 60496  | AASDHPPT  | -0.0519 | 0.8873 |
| 11015 | E12 | 7495  | 8970   | HIST1H2BJ | -0.0519 | 0.8873 |
| 31008 | C10 | 11737 | 10078  | TSSC4     | -0.0519 | 0.8873 |
| 11088 | B11 | 1380  | 3305   | HSPA1L    | -0.0519 | 0.8874 |
| 31025 | F01 | 13496 | 7515   | XRCC1     | -0.0519 | 0.8874 |
| 11060 | G09 | 8507  | 120400 | FAM55A    | -0.0519 | 0.8874 |
| 11003 | H01 | 8547  | 349565 | NMNAT3    | -0.0518 | 0.8875 |
| 11038 | D03 | 5317  | 5315   | PKM2      | -0.0518 | 0.8875 |
| 11007 | B03 | 9597  | 1774   | DNASE1L1  | -0.0518 | 0.8876 |
| 11018 | B08 | 7429  | 116123 | FMO9P     | -0.0518 | 0.8876 |
| 11075 | F12 | 5534  | 51126  | NAA20     | -0.0518 | 0.8877 |
| 11003 | D12 | 9204  | 128646 | SIRPD     | -0.0517 | 0.8877 |
| 31042 | A04 | 6695  | 9045   | RPL14     | -0.0517 | 0.8878 |
| 51030 | C01 | 56907 | 147166 | TRIM16L   | -0.0517 | 0.8878 |
| 51034 | E03 | 54713 | 3010   | HIST1H1T  | -0.0517 | 0.8879 |
| 31018 | A10 | 12984 | 136647 | C7orf11   | -0.0516 | 0.8879 |
| 11020 | H09 | 5786  | 515    | ATP5F1    | -0.0516 | 0.8879 |
| 11009 | B10 | 584   | 26256  | CABYR     | -0.0516 | 0.8879 |
| 11042 | A09 | 5741  | 8190   | MIA       | -0.0516 | 0.8880 |
| 11036 | G03 | 7939  | 49856  | WDR8      | -0.0516 | 0.8880 |
| 51010 | D01 | 53117 | 57758  | SCUBE2    | -0.0516 | 0.8881 |
| 11004 | B12 | 5443  | 80213  | TM2D3     | -0.0516 | 0.8881 |
| 51011 | D01 | 52854 | 57343  | ZNF304    | -0.0515 | 0.8881 |
| 11037 | B12 | 3506  | 23378  | RRP8      | -0.0515 | 0.8881 |
| 11088 | E08 | 867   | 6668   | SP2       | -0.0515 | 0.8882 |
| 31016 | B07 | 12822 | 83468  | GLT8D2    | -0.0515 | 0.8883 |

|       |     |       |        |           |         |        |
|-------|-----|-------|--------|-----------|---------|--------|
| 11008 | G11 | 6937  | 10488  | CREB3     | -0.0515 | 0.8883 |
| 11016 | G10 | 9076  | 729991 | LOC729991 | -0.0514 | 0.8883 |
| 31011 | G11 | 12380 | 55652  | SLC48A1   | -0.0514 | 0.8884 |
| 11037 | F12 | 5152  | 79875  | THSD4     | -0.0514 | 0.8885 |
| 11083 | D05 | 9141  | 3308   | HSPA4     | -0.0514 | 0.8885 |
| 11014 | H03 | 532   | 22937  | SCAP      | -0.0513 | 0.8885 |
| 31022 | B04 | 13774 | 8260   | NAA10     | -0.0513 | 0.8885 |
| 31019 | B10 | 12895 | 1193   | CLIC2     | -0.0513 | 0.8885 |
| 11034 | D05 | 2101  | 84690  | SPATA22   | -0.0513 | 0.8886 |
| 51029 | E04 | 55486 | 84216  | TMEM117   | -0.0513 | 0.8886 |
| 31040 | F09 | 9565  | 4355   | MPP2      | -0.0513 | 0.8887 |
| 31019 | A03 | 13224 | 56672  | C11orf17  | -0.0512 | 0.8887 |
| 31017 | B01 | 12631 | 26118  | WSB1      | -0.0512 | 0.8887 |
| 11005 | B02 | 5604  | 2952   | GSTT1     | -0.0512 | 0.8889 |
| 11029 | F04 | 9351  | 5874   | RAB27B    | -0.0511 | 0.8889 |
| 11077 | A10 | 3784  | 6185   | RPN2      | -0.0510 | 0.8891 |
| 31042 | E07 | 6565  | 55435  | AP1AR     | -0.0510 | 0.8891 |
| 31012 | E08 | 11976 | 128853 | DUSP15    | -0.0510 | 0.8891 |
| 51010 | A07 | 52832 | 152503 | SH3D19    | -0.0510 | 0.8892 |
| 11007 | B06 | 6682  | 54487  | DGCR8     | -0.0510 | 0.8892 |
| 11049 | C06 | 5751  | 3123   | HLA-DRB1  | -0.0510 | 0.8893 |
| 31016 | E04 | 12821 | 51109  | RDH11     | -0.0509 | 0.8893 |
| 11052 | G03 | 8567  | 7316   | UBC       | -0.0509 | 0.8894 |
| 11040 | B05 | 5169  | 84987  | C12orf62  | -0.0509 | 0.8894 |
| 11007 | D03 | 2152  | 79734  | KCTD17    | -0.0508 | 0.8896 |
| 31044 | D07 | 8430  | 9865   | TRIL      | -0.0508 | 0.8896 |
| 51009 | H04 | 54314 | 151050 | C2orf67   | -0.0508 | 0.8897 |
| 51032 | C03 | 55403 | 128344 | C1orf88   | -0.0508 | 0.8897 |
| 31015 | H10 | 12421 | 60436  | TGIF2     | -0.0507 | 0.8898 |
| 11084 | A04 | 8124  | 387758 | FIBIN     | -0.0507 | 0.8898 |
| 11015 | B09 | 5415  | 158435 | LOC158435 | -0.0507 | 0.8898 |
| 31038 | E10 | 6614  | 55113  | XKR8      | -0.0507 | 0.8899 |
| 51005 | D07 | 53763 | 7443   | VRK1      | -0.0506 | 0.8899 |
| 11073 | G07 | 4290  | 6217   | RPS16     | -0.0506 | 0.8900 |
| 31043 | B02 | 7413  | 10134  | BCAP31    | -0.0506 | 0.8900 |
| 51033 | C03 | 55392 | 81631  | MAP1LC3B  | -0.0506 | 0.8900 |
| 11015 | F01 | 8962  | 84328  | LZIC      | -0.0506 | 0.8900 |
| 31021 | C11 | 13210 | 2719   | GPC3      | -0.0506 | 0.8901 |
| 31016 | G08 | 12722 | 90362  | FAM110B   | -0.0505 | 0.8902 |
| 11050 | H10 | 4413  | 64393  | ZMAT3     | -0.0505 | 0.8902 |
| 31033 | E06 | 14823 | 80332  | ADAM33    | -0.0505 | 0.8902 |
| 31032 | A03 | 14529 | 1133   | CHRM5     | -0.0505 | 0.8903 |
| 31012 | A08 | 11875 | 5891   | RAGE      | -0.0504 | 0.8903 |
| 11072 | E07 | 2295  | 139135 | PASD1     | -0.0504 | 0.8904 |

|       |     |       |        |          |         |        |
|-------|-----|-------|--------|----------|---------|--------|
| 11070 | C03 | 7066  | 5027   | P2RX7    | -0.0504 | 0.8904 |
| 31004 | A06 | 10917 | 5412   | UBL3     | -0.0504 | 0.8904 |
| 31030 | D07 | 14416 | 23213  | SULF1    | -0.0503 | 0.8905 |
| 11008 | B02 | 380   | 11344  | TWF2     | -0.0503 | 0.8906 |
| 11044 | B08 | 136   | 53827  | FXYD5    | -0.0503 | 0.8907 |
| 11080 | E06 | 6718  | 4343   | MOV10    | -0.0503 | 0.8907 |
| 11030 | C10 | 3853  | 56898  | BDH2     | -0.0503 | 0.8907 |
| 31017 | A08 | 13028 | 81889  | FAHD1    | -0.0502 | 0.8908 |
| 11075 | H04 | 1584  | 133690 | CAPSL    | -0.0502 | 0.8908 |
| 11020 | B12 | 5312  | 83931  | STK40    | -0.0502 | 0.8908 |
| 31033 | F02 | 14690 | 23580  | CDC42EP4 | -0.0502 | 0.8908 |
| 31011 | G01 | 11606 | 5333   | PLCD1    | -0.0502 | 0.8908 |
| 11003 | B03 | 9035  | 2767   | GNA11    | -0.0502 | 0.8909 |
| 31003 | B10 | 10535 | 340307 | CTAGE6P  | -0.0502 | 0.8909 |
| 11059 | B04 | 795   | 90557  | CCDC74A  | -0.0502 | 0.8909 |
| 11071 | B12 | 9246  | 57535  | KIAA1324 | -0.0501 | 0.8910 |
| 11056 | C05 | 4859  | 11266  | DUSP12   | -0.0500 | 0.8912 |
| 51031 | C06 | 55840 | 128178 | EDARADD  | -0.0500 | 0.8913 |
| 51012 | E02 | 53074 | 54756  | IL17RD   | -0.0500 | 0.8913 |
| 51026 | G08 | 56927 | 115703 | ARHGAP33 | -0.0500 | 0.8913 |
| 31039 | A11 | 5934  | 4522   | MTHFD1   | -0.0500 | 0.8914 |
| 11035 | E02 | 6361  | 10097  | ACTR2    | -0.0499 | 0.8914 |
| 11049 | C12 | 4385  | 65005  | MRPL9    | -0.0499 | 0.8914 |
| 11062 | H09 | 8338  | 22854  | NTNG1    | -0.0499 | 0.8915 |
| 31039 | C02 | 3155  | 334    | APLP2    | -0.0499 | 0.8915 |
| 31041 | H05 | 5274  | 3142   | HLX      | -0.0499 | 0.8915 |
| 11071 | F09 | 7978  | 28232  | SLCO3A1  | -0.0499 | 0.8915 |
| 11001 | D06 | 908   | 51326  | ARL17A   | -0.0498 | 0.8916 |
| 11032 | A04 | 7295  | 85409  | NKD2     | -0.0498 | 0.8916 |
| 11019 | A05 | 7427  | 118932 | ANKRD22  | -0.0498 | 0.8916 |
| 11019 | F03 | 6610  | 6882   | TAF11    | -0.0498 | 0.8916 |
| 51031 | E07 | 56906 | 79064  | TMEM223  | -0.0498 | 0.8917 |
| 11012 | H04 | 6267  | 84619  | ZGPAT    | -0.0498 | 0.8917 |
| 11016 | F02 | 7171  | 116540 | MRPL53   | -0.0497 | 0.8918 |
| 11029 | B05 | 2568  | 26112  | CCDC69   | -0.0497 | 0.8918 |
| 11039 | C11 | 7070  | 57655  | GRAMD1A  | -0.0497 | 0.8918 |
| 31001 | C11 | 10375 | 5634   | PRPS2    | -0.0497 | 0.8918 |
| 11044 | E10 | 2192  | 5037   | PEBP1    | -0.0497 | 0.8918 |
| 11032 | C03 | 6407  | 10069  | RWDD2B   | -0.0497 | 0.8919 |
| 51011 | C07 | 54101 | 1122   | CHML     | -0.0497 | 0.8919 |
| 51029 | D07 | 56245 | 5604   | MAP2K1   | -0.0497 | 0.8919 |
| 11059 | C04 | 4345  | 2353   | FOS      | -0.0497 | 0.8920 |
| 11030 | G07 | 7957  | 7390   | UROS     | -0.0496 | 0.8920 |
| 11069 | E05 | 4796  | 4324   | MMP15    | -0.0496 | 0.8920 |

|       |     |       |        |           |         |        |
|-------|-----|-------|--------|-----------|---------|--------|
| 11018 | A03 | 6689  | 113691 | MGC16703  | -0.0496 | 0.8920 |
| 11058 | F10 | 5239  | 10095  | ARPC1B    | -0.0496 | 0.8920 |
| 51033 | B10 | 53707 | 284029 | C17orf44  | -0.0496 | 0.8921 |
| 31001 | D12 | 10732 | 129880 | BBS5      | -0.0495 | 0.8922 |
| 31006 | C08 | 11101 | 94     | ACVRL1    | -0.0495 | 0.8922 |
| 51005 | H11 | 54092 | 79868  | ALG13     | -0.0495 | 0.8922 |
| 31024 | F12 | 13613 | 2070   | EYA4      | -0.0495 | 0.8923 |
| 51032 | C01 | 56486 | 284836 | C21orf125 | -0.0495 | 0.8923 |
| 31027 | F09 | 14548 | 64091  | POPDC2    | -0.0495 | 0.8924 |
| 51030 | G05 | 56463 | 51213  | LUZP4     | -0.0494 | 0.8924 |
| 11027 | G07 | 3398  | 79081  | C11orf48  | -0.0494 | 0.8924 |
| 31002 | E07 | 10699 | 7567   | ZNF19     | -0.0494 | 0.8925 |
| 51013 | F09 | 54069 | 126669 | SHE       | -0.0494 | 0.8925 |
| 51033 | D01 | 56437 | NA     | NA        | -0.0494 | 0.8925 |
| 11044 | E02 | 4788  | 54991  | C1orf159  | -0.0493 | 0.8926 |
| 31036 | A12 | 11944 | 79874  | RABEP2    | -0.0493 | 0.8927 |
| 31041 | F04 | 6235  | 126306 | JSRP1     | -0.0493 | 0.8927 |
| 11059 | B10 | 5676  | 51566  | ARMCX3    | -0.0493 | 0.8927 |
| 11036 | A04 | 6014  | 445    | ASS1      | -0.0493 | 0.8927 |
| 11061 | A05 | 3844  | 95     | ACY1      | -0.0493 | 0.8928 |
| 11044 | E06 | 591   | 115286 | SLC25A26  | -0.0493 | 0.8928 |
| 11064 | G04 | 10020 | 1138   | CHRNA5    | -0.0492 | 0.8928 |
| 51002 | A07 | 53872 | 130872 | AHSA2     | -0.0492 | 0.8928 |
| 11071 | B11 | 688   | 11216  | AKAP10    | -0.0492 | 0.8929 |
| 31029 | G05 | 14255 | 339448 | C1orf174  | -0.0492 | 0.8930 |
| 11040 | B11 | 5550  | 486    | FXVD2     | -0.0492 | 0.8930 |
| 11042 | A06 | 6349  | 51003  | MED31     | -0.0491 | 0.8930 |
| 31015 | B05 | 12487 | 64940  | STAG3L4   | -0.0491 | 0.8931 |
| 11030 | B10 | 1148  | 23531  | MMD       | -0.0491 | 0.8931 |
| 51008 | B01 | 54337 | 22866  | CNKSR2    | -0.0491 | 0.8931 |
| 31005 | B03 | 11250 | 255352 | C10orf93  | -0.0491 | 0.8931 |
| 31010 | A08 | 11551 | 51411  | BIN2      | -0.0491 | 0.8931 |
| 11087 | G09 | 3444  | 827    | CAPN6     | -0.0491 | 0.8932 |
| 31005 | B12 | 11165 | 79616  | CCNJL     | -0.0490 | 0.8933 |
| 11088 | H09 | 660   | 9878   | TOX4      | -0.0490 | 0.8933 |
| 11041 | F06 | 8641  | 54933  | RHBDL2    | -0.0490 | 0.8933 |
| 11064 | G11 | 7702  | 51004  | COQ6      | -0.0489 | 0.8934 |
| 11040 | C05 | 9072  | 2790   | GNG10     | -0.0489 | 0.8935 |
| 31011 | F04 | 11574 | 4790   | NFKB1     | -0.0489 | 0.8935 |
| 51020 | H06 | 56576 | 55005  | RMND1     | -0.0489 | 0.8935 |
| 51035 | E02 | 53479 | 5459   | POU4F3    | -0.0489 | 0.8935 |
| 11071 | A08 | 7023  | 9690   | UBE3C     | -0.0489 | 0.8935 |
| 11072 | B10 | 7143  | 1653   | DDX1      | -0.0489 | 0.8936 |
| 31014 | E11 | 12195 | 257160 | RNF214    | -0.0488 | 0.8938 |

|       |     |       |           |           |         |        |
|-------|-----|-------|-----------|-----------|---------|--------|
| 31038 | E02 | 14799 | 221472    | FGD2      | -0.0487 | 0.8938 |
| 11013 | E11 | 1686  | 11275     | KLHL2     | -0.0487 | 0.8938 |
| 11078 | A01 | 1535  | 56890     | MDM1      | -0.0487 | 0.8939 |
| 11067 | H09 | 2212  | 8798      | DYRK4     | -0.0487 | 0.8939 |
| 31021 | E11 | 12904 | 10056     | FARSB     | -0.0487 | 0.8939 |
| 11016 | H06 | 5189  | 84989     | LOC84989  | -0.0487 | 0.8939 |
| 11047 | A08 | 4097  | 29950     | SERTAD1   | -0.0486 | 0.8940 |
| 31041 | C10 | 8959  | NA        | NA        | -0.0486 | 0.8941 |
| 31045 | B07 | 9827  | 8528      | DDO       | -0.0486 | 0.8941 |
| 51002 | H07 | 54850 | 391104    | VHLL      | -0.0486 | 0.8941 |
| 31040 | G09 | 8202  | 126295    | ZNF57     | -0.0486 | 0.8942 |
| 51011 | D10 | 52870 | 3751      | KCND2     | -0.0486 | 0.8942 |
| 31010 | B01 | 11822 | 7133      | TNFRSF1B  | -0.0485 | 0.8942 |
| 11016 | D05 | 7412  | 10632     | ATP5L     | -0.0485 | 0.8943 |
| 11037 | E09 | 7455  | 10172     | ZNF256    | -0.0485 | 0.8943 |
| 31005 | G06 | 10984 | 3921      | RPSA      | -0.0485 | 0.8944 |
| 11009 | G10 | 5245  | 64222     | TOR3A     | -0.0485 | 0.8944 |
| 11009 | H05 | 3820  | 54386     | TERF2IP   | -0.0485 | 0.8944 |
| 11047 | E08 | 934   | 83590     | TMUB1     | -0.0485 | 0.8944 |
| 11036 | C08 | 3603  | 6610      | SMPD2     | -0.0484 | 0.8945 |
| 11080 | G06 | 2979  | 56905     | C15orf39  | -0.0484 | 0.8945 |
| 31014 | G10 | 12319 | 9868      | TOMM70A   | -0.0484 | 0.8946 |
| 11073 | G01 | 8912  | 9442      | MED27     | -0.0484 | 0.8946 |
| 51001 | B04 | 54890 | 100101267 | POM121C   | -0.0483 | 0.8947 |
| 31017 | G09 | 13265 | 5570      | PKIB      | -0.0483 | 0.8947 |
| 11061 | C12 | 217   | 10964     | IFI44L    | -0.0483 | 0.8948 |
| 51011 | C06 | 52962 | 55765     | C1orf106  | -0.0482 | 0.8949 |
| 11075 | B09 | 5314  | 79686     | C14orf139 | -0.0482 | 0.8950 |
| 11040 | E05 | 5705  | 6726      | SRP9      | -0.0482 | 0.8950 |
| 11059 | C10 | 7256  | 245973    | ATP6V1C2  | -0.0481 | 0.8951 |
| 11020 | H06 | 6000  | 10602     | CDC42EP3  | -0.0481 | 0.8951 |
| 11043 | B05 | 5718  | 4878      | NPPA      | -0.0481 | 0.8951 |
| 51026 | E09 | 53198 | 9718      | ECE2      | -0.0481 | 0.8951 |
| 51033 | A11 | 53604 | 4616      | GADD45B   | -0.0481 | 0.8951 |
| 11082 | H02 | 8286  | 1668      | DEFA3     | -0.0481 | 0.8952 |
| 11062 | G04 | 10189 | 3373      | HYAL1     | -0.0481 | 0.8952 |
| 31041 | H02 | 4060  | 3182      | HNRNPAB   | -0.0481 | 0.8952 |
| 31030 | F11 | 14275 | 55683     | KIAA1310  | -0.0481 | 0.8952 |
| 11078 | G10 | 7570  | 221927    | C7orf27   | -0.0481 | 0.8952 |
| 31032 | G10 | 14733 | 64102     | TNMD      | -0.0481 | 0.8952 |
| 51033 | E01 | 55743 | 1347      | COX7A2    | -0.0481 | 0.8953 |
| 11083 | B09 | 610   | 79833     | GEMIN6    | -0.0481 | 0.8953 |
| 31013 | B05 | 12265 | 6855      | SYP       | -0.0481 | 0.8953 |
| 31043 | C08 | 6836  | 80279     | CDK5RAP3  | -0.0480 | 0.8953 |

|       |     |       |        |           |         |        |
|-------|-----|-------|--------|-----------|---------|--------|
| 51020 | D03 | 56603 | 6619   | SNAPC3    | -0.0480 | 0.8954 |
| 11074 | C09 | 5011  | 84276  | NICN1     | -0.0480 | 0.8954 |
| 31005 | C07 | 10921 | 63908  | NAPB      | -0.0480 | 0.8954 |
| 11087 | E06 | 7172  | 6512   | SLC1A7    | -0.0480 | 0.8954 |
| 51005 | G08 | 55043 | 391123 | VSIG8     | -0.0480 | 0.8954 |
| 11084 | D05 | 273   | 2287   | FKBP3     | -0.0480 | 0.8955 |
| 31034 | H01 | 15010 | 201181 | ZNF385C   | -0.0479 | 0.8955 |
| 11028 | E01 | 2845  | 92840  | REEP6     | -0.0479 | 0.8955 |
| 51013 | E10 | 52986 | 22863  | ATG14     | -0.0479 | 0.8955 |
| 11088 | C05 | 9792  | 124222 | PAQR4     | -0.0479 | 0.8955 |
| 51029 | F04 | 55916 | 56997  | CABC1     | -0.0479 | 0.8956 |
| 31032 | D02 | 14511 | 84163  | GTF2IRD2  | -0.0479 | 0.8956 |
| 31032 | D05 | 14659 | 54487  | DGCR8     | -0.0479 | 0.8957 |
| 51021 | H08 | 13996 | 8807   | IL18RAP   | -0.0478 | 0.8958 |
| 11024 | E04 | 8234  | 170063 | CXorf22   | -0.0478 | 0.8958 |
| 11003 | F11 | 8464  | 123228 | SENP8     | -0.0478 | 0.8958 |
| 11039 | A06 | 1572  | 54521  | WDR44     | -0.0477 | 0.8959 |
| 11051 | C11 | 954   | 10897  | YIF1A     | -0.0477 | 0.8959 |
| 31002 | F10 | 10640 | 79673  | ZNF329    | -0.0477 | 0.8960 |
| 11036 | H11 | 9582  | 57657  | HCN3      | -0.0477 | 0.8960 |
| 31005 | D09 | 11212 | 27097  | TAF5L     | -0.0477 | 0.8960 |
| 11085 | E02 | 8255  | 28663  | TRAV20    | -0.0476 | 0.8962 |
| 31020 | H04 | 12878 | 64208  | POPDC3    | -0.0476 | 0.8962 |
| 11087 | C11 | 4569  | 84445  | LZTS2     | -0.0476 | 0.8962 |
| 11030 | F09 | 5122  | 81555  | YIPF5     | -0.0475 | 0.8963 |
| 11044 | D01 | 8140  | 54951  | COMMD8    | -0.0475 | 0.8963 |
| 11065 | F08 | 1461  | 8854   | ALDH1A2   | -0.0475 | 0.8963 |
| 11071 | F08 | 9361  | 79932  | KIAA0319L | -0.0475 | 0.8963 |
| 31036 | C06 | 11608 | 10908  | PNPLA6    | -0.0475 | 0.8964 |
| 31019 | F10 | 13163 | 6194   | RPS6      | -0.0474 | 0.8966 |
| 11012 | G06 | 5860  | 54920  | DUS2L     | -0.0474 | 0.8967 |
| 31041 | D05 | 5702  | 6605   | SMARCE1   | -0.0473 | 0.8967 |
| 31027 | C11 | 14817 | 83538  | TTC25     | -0.0473 | 0.8968 |
| 11088 | B07 | 1196  | 8326   | FZD9      | -0.0473 | 0.8968 |
| 11052 | H11 | 5197  | 90589  | ZNF625    | -0.0472 | 0.8970 |
| 11047 | E04 | 944   | 54940  | OCIAD1    | -0.0472 | 0.8970 |
| 11062 | F11 | 4131  | 2026   | ENO2      | -0.0472 | 0.8970 |
| 51008 | E11 | 56229 | 23086  | EXPH5     | -0.0472 | 0.8970 |
| 11081 | F03 | 7374  | 10793  | ZNF273    | -0.0472 | 0.8970 |
| 11058 | E10 | 8155  | 92999  | ZBTB47    | -0.0472 | 0.8971 |
| 51035 | H10 | 54503 | 5150   | PDE7A     | -0.0471 | 0.8971 |
| 11078 | D10 | 2070  | 204851 | HIPK1     | -0.0471 | 0.8972 |
| 11005 | B06 | 9318  | 5155   | PDGFB     | -0.0471 | 0.8972 |
| 51006 | C03 | 55821 | 170384 | FUT11     | -0.0471 | 0.8972 |



|       |     |       |        |           |         |        |
|-------|-----|-------|--------|-----------|---------|--------|
| 31031 | E10 | 14603 | 9293   | GPR52     | -0.0471 | 0.8973 |
| 31003 | B07 | 10335 | 127435 | PODN      | -0.0471 | 0.8973 |
| 11087 | F12 | 5428  | 55023  | PHIP      | -0.0471 | 0.8973 |
| 11086 | G02 | 6928  | 56941  | C3orf37   | -0.0471 | 0.8973 |
| 31017 | H09 | 12930 | 2996   | GYPE      | -0.0471 | 0.8973 |
| 31007 | F10 | 11680 | 10406  | WFDC2     | -0.0470 | 0.8974 |
| 11082 | G01 | 9085  | 151194 | FAM119A   | -0.0470 | 0.8974 |
| 31006 | E12 | 11081 | 91526  | ANKRD44   | -0.0470 | 0.8975 |
| 11072 | G05 | 9829  | 29915  | HCFC2     | -0.0470 | 0.8975 |
| 31004 | B06 | 11051 | 492303 | GEMIN8P4  | -0.0470 | 0.8975 |
| 11024 | C08 | 4658  | 6897   | TARS      | -0.0469 | 0.8976 |
| 11069 | G01 | 6853  | 8930   | MBD4      | -0.0469 | 0.8976 |
| 11008 | G09 | 699   | 29968  | PSAT1     | -0.0469 | 0.8977 |
| 51020 | G06 | 55921 | 114824 | PNMA5     | -0.0469 | 0.8977 |
| 11016 | H03 | 5484  | 6119   | RPA3      | -0.0468 | 0.8978 |
| 11001 | B03 | 106   | 404266 | LOC404266 | -0.0468 | 0.8979 |
| 11025 | E04 | 10142 | 729    | C6        | -0.0468 | 0.8979 |
| 11088 | H08 | 2937  | 84894  | LINGO1    | -0.0467 | 0.8980 |
| 11017 | E05 | 7698  | 1030   | CDKN2B    | -0.0467 | 0.8980 |
| 51006 | H04 | 54483 | 26045  | LRRTM2    | -0.0467 | 0.8980 |
| 31029 | H11 | 14290 | 22929  | SEPHS1    | -0.0467 | 0.8981 |
| 11029 | C05 | 3288  | 79003  | MIS12     | -0.0467 | 0.8981 |
| 51006 | D10 | 55051 | 79642  | ARSJ      | -0.0467 | 0.8981 |
| 51003 | G09 | 52998 | 148231 | FLJ25328  | -0.0467 | 0.8981 |
| 11020 | A10 | 7732  | 57002  | C7orf36   | -0.0466 | 0.8982 |
| 11053 | F03 | 101   | 51115  | FAM82B    | -0.0466 | 0.8982 |
| 51001 | E11 | 55101 | 388403 | YPEL2     | -0.0466 | 0.8983 |
| 31042 | H10 | 5561  | 27430  | MAT2B     | -0.0466 | 0.8983 |
| 51003 | E01 | 52645 | 144360 | C12orf67  | -0.0466 | 0.8983 |
| 11079 | B02 | 5976  | 9787   | DLGAP5    | -0.0466 | 0.8983 |
| 31042 | C08 | 4981  | 2055   | CLN8      | -0.0466 | 0.8983 |
| 51027 | B10 | 55550 | 259307 | IL4I1     | -0.0466 | 0.8983 |
| 11078 | E09 | 2036  | 119437 | CTAGEP    | -0.0465 | 0.8984 |
| 11066 | F11 | 1003  | 23678  | SGK3      | -0.0465 | 0.8984 |
| 31044 | E04 | 4571  | 10491  | CRTAP     | -0.0465 | 0.8984 |
| 11087 | H10 | 5350  | 10300  | KATNB1    | -0.0465 | 0.8984 |
| 11044 | D11 | 7319  | 92610  | TIFA      | -0.0465 | 0.8985 |
| 11027 | F09 | 8059  | 57642  | COL20A1   | -0.0465 | 0.8985 |
| 51018 | G11 | 55942 | 90273  | CEACAM21  | -0.0464 | 0.8986 |
| 51024 | F04 | 55175 | 3480   | IGF1R     | -0.0464 | 0.8987 |
| 11048 | B08 | 2869  | 23474  | ETHE1     | -0.0464 | 0.8987 |
| 11067 | B12 | 617   | 6472   | SHMT2     | -0.0463 | 0.8988 |
| 51028 | B02 | 55390 | 7639   | ZNF85     | -0.0463 | 0.8988 |
| 31004 | F03 | 10542 | 160851 | DGKH      | -0.0463 | 0.8989 |

|       |     |       |        |           |         |        |
|-------|-----|-------|--------|-----------|---------|--------|
| 31043 | D07 | 7826  | 2517   | FUCA1     | -0.0463 | 0.8989 |
| 11021 | F05 | 8871  | 4241   | MF12      | -0.0463 | 0.8989 |
| 11088 | C03 | 5674  | 54951  | COMMD8    | -0.0463 | 0.8990 |
| 31012 | H01 | 12148 | 150147 | C21orf128 | -0.0463 | 0.8990 |
| 11078 | G04 | 7104  | 26     | ABP1      | -0.0462 | 0.8991 |
| 31007 | G03 | 10885 | 6660   | SOX5      | -0.0462 | 0.8991 |
| 11078 | F10 | 6143  | 90799  | CCDC45    | -0.0462 | 0.8991 |
| 31007 | A05 | 10884 | 3141   | HLCS      | -0.0462 | 0.8991 |
| 11046 | H10 | 3913  | 9741   | LAPTM4A   | -0.0462 | 0.8992 |
| 11085 | B07 | 14    | 51507  | C20orf43  | -0.0461 | 0.8993 |
| 11049 | E03 | 3059  | 3553   | IL1B      | -0.0461 | 0.8993 |
| 11063 | B08 | 2943  | 79624  | C6orf211  | -0.0461 | 0.8993 |
| 51004 | C09 | 54581 | 79839  | CCDC102B  | -0.0461 | 0.8994 |
| 11020 | A02 | 7418  | 57393  | TMEM27    | -0.0460 | 0.8994 |
| 11012 | A09 | 7642  | 3190   | HNRNPK    | -0.0460 | 0.8995 |
| 11009 | G09 | 426   | 64222  | TOR3A     | -0.0460 | 0.8996 |
| 31013 | D07 | 12126 | 55012  | PPP2R3C   | -0.0459 | 0.8996 |
| 11042 | G09 | 4349  | 8712   | PAGE1     | -0.0459 | 0.8996 |
| 31010 | G08 | 11612 | 253943 | YTHDF3    | -0.0459 | 0.8996 |
| 51001 | B02 | 54937 | 497048 | KU-MEL-3  | -0.0459 | 0.8996 |
| 51002 | B08 | 53495 | 3906   | LALBA     | -0.0459 | 0.8997 |
| 11021 | D10 | 8955  | 51564  | HDAC7     | -0.0459 | 0.8997 |
| 51026 | D11 | 15011 | 64787  | EPS8L2    | -0.0459 | 0.8997 |
| 51033 | D11 | 54421 | 129852 | C2orf73   | -0.0459 | 0.8997 |
| 51032 | D12 | 55322 | 389741 | MGC21881  | -0.0459 | 0.8998 |
| 11002 | A11 | 330   | 7305   | TYROBP    | -0.0459 | 0.8998 |
| 31042 | F01 | 4411  | 51531  | C9orf156  | -0.0459 | 0.8998 |
| 11038 | D11 | 5819  | 22948  | CCT5      | -0.0459 | 0.8998 |
| 11017 | A12 | 6065  | 113246 | C12orf57  | -0.0458 | 0.8999 |
| 51006 | B09 | 53350 | 57209  | ZNF248    | -0.0458 | 0.8999 |
| 11007 | C06 | 6595  | 51073  | MRPL4     | -0.0458 | 0.8999 |
| 31040 | G03 | 9732  | 169981 | SPIN3     | -0.0458 | 0.8999 |
| 11078 | D08 | 6673  | 1186   | CLCN7     | -0.0458 | 0.8999 |
| 31039 | A03 | 9315  | 9921   | RNF10     | -0.0458 | 0.9000 |
| 11029 | E10 | 925   | 55233  | MOBKL1B   | -0.0458 | 0.9000 |
| 31033 | F11 | 14957 | 118471 | PRAP1     | -0.0458 | 0.9000 |
| 11061 | F07 | 5505  | 1358   | CPA2      | -0.0457 | 0.9000 |
| 31024 | G10 | 13639 | 79083  | MLPH      | -0.0457 | 0.9001 |
| 51021 | H07 | 56055 | 80110  | ZNF614    | -0.0457 | 0.9001 |
| 11035 | F01 | 9894  | 57863  | CADM3     | -0.0457 | 0.9001 |
| 51002 | D05 | 52564 | 163590 | TOR1AIP2  | -0.0457 | 0.9001 |
| 31020 | H09 | 13220 | 56670  | SUCNR1    | -0.0457 | 0.9001 |
| 31001 | A04 | 10333 | 51714  | SELT      | -0.0457 | 0.9001 |
| 51022 | H04 | 56092 | 84678  | KDM2B     | -0.0457 | 0.9001 |

|       |     |       |        |          |         |        |
|-------|-----|-------|--------|----------|---------|--------|
| 11039 | D03 | 7043  | 1877   | E4F1     | -0.0457 | 0.9001 |
| 11040 | E04 | 5973  | 63905  | MANBAL   | -0.0457 | 0.9002 |
| 11035 | F05 | 2401  | 3988   | LIPA     | -0.0456 | 0.9003 |
| 51015 | F12 | 54172 | 55509  | BATF3    | -0.0456 | 0.9003 |
| 31031 | E09 | 14579 | 2844   | GPR21    | -0.0455 | 0.9004 |
| 11043 | A03 | 5471  | 4632   | MYL1     | -0.0455 | 0.9004 |
| 31045 | H04 | 7993  | 6170   | RPL39    | -0.0455 | 0.9005 |
| 51003 | E12 | 55620 | 64417  | C5orf28  | -0.0455 | 0.9006 |
| 31004 | F12 | 11272 | 124641 | OVCA2    | -0.0455 | 0.9006 |
| 11086 | F11 | 6670  | 3134   | HLA-F    | -0.0455 | 0.9006 |
| 31031 | C09 | 14591 | 2832   | NPBWR2   | -0.0455 | 0.9006 |
| 11071 | D10 | 842   | 660    | BMX      | -0.0455 | 0.9006 |
| 51027 | D10 | 56325 | 26051  | PPP1R16B | -0.0454 | 0.9007 |
| 31025 | E11 | 13983 | 2169   | FABP2    | -0.0454 | 0.9007 |
| 11005 | A10 | 467   | 54550  | NECAB2   | -0.0454 | 0.9007 |
| 51013 | B05 | 54434 | 102    | ADAM10   | -0.0454 | 0.9007 |
| 31045 | G02 | 4927  | 84515  | MCM8     | -0.0454 | 0.9007 |
| 51022 | D10 | 56189 | 94134  | ARHGAP12 | -0.0454 | 0.9008 |
| 11041 | E03 | 1099  | 148223 | C19orf25 | -0.0454 | 0.9008 |
| 11028 | A11 | 1156  | 8153   | RND2     | -0.0454 | 0.9008 |
| 11088 | D10 | 1568  | 5042   | PABPC3   | -0.0454 | 0.9008 |
| 31028 | F10 | 14157 | 125336 | LOXHD1   | -0.0453 | 0.9009 |
| 11021 | G03 | 4071  | 5515   | PPP2CA   | -0.0453 | 0.9009 |
| 11084 | A08 | 2872  | 4762   | NEUROG1  | -0.0453 | 0.9009 |
| 11082 | A01 | 3234  | 1340   | COX6B1   | -0.0453 | 0.9009 |
| 31040 | D05 | 10074 | 55686  | MREG     | -0.0453 | 0.9009 |
| 11085 | B06 | 2504  | 83541  | FAM110A  | -0.0453 | 0.9010 |
| 11078 | H07 | 6504  | 26958  | COPG2    | -0.0452 | 0.9011 |
| 11072 | B06 | 6806  | 8985   | PLOD3    | -0.0452 | 0.9011 |
| 51034 | F05 | 53827 | 283165 | PRR10    | -0.0452 | 0.9011 |
| 11074 | G11 | 1388  | 93081  | C13orf27 | -0.0452 | 0.9012 |
| 31004 | C11 | 10999 | 153743 | PPP1R2P3 | -0.0452 | 0.9012 |
| 11049 | E01 | 6268  | 57798  | GATAD1   | -0.0452 | 0.9012 |
| 51006 | H03 | 54190 | 3887   | KRT81    | -0.0452 | 0.9012 |
| 11064 | C02 | 2863  | 5781   | PTPN11   | -0.0452 | 0.9012 |
| 51028 | B01 | 55454 | 1370   | CPN2     | -0.0452 | 0.9012 |
| 11042 | F03 | 5982  | 23406  | COTL1    | -0.0451 | 0.9013 |
| 11040 | E07 | 2209  | 414149 | ACBD7    | -0.0451 | 0.9013 |
| 31034 | G01 | 14842 | 56246  | MRAP     | -0.0451 | 0.9014 |
| 51009 | C03 | 52692 | 26050  | SLITRK5  | -0.0451 | 0.9014 |
| 11079 | B05 | 5903  | 27044  | SND1     | -0.0451 | 0.9014 |
| 31030 | G10 | 14304 | 730    | C7       | -0.0451 | 0.9014 |
| 11078 | B10 | 8675  | 27332  | ZNF638   | -0.0451 | 0.9015 |
| 11017 | B07 | 9185  | 81544  | GDPD5    | -0.0450 | 0.9016 |

|       |     |       |        |          |         |        |
|-------|-----|-------|--------|----------|---------|--------|
| 31013 | C04 | 12307 | 152137 | CCDC50   | -0.0450 | 0.9016 |
| 11043 | G04 | 4955  | 27129  | HSPB7    | -0.0450 | 0.9016 |
| 11022 | G11 | 7478  | 9813   | KIAA0494 | -0.0449 | 0.9017 |
| 11002 | A12 | 2805  | 9616   | RNF7     | -0.0449 | 0.9017 |
| 31026 | H07 | 13870 | 7200   | TRH      | -0.0449 | 0.9018 |
| 11067 | G03 | 6306  | 9873   | FCHSD2   | -0.0449 | 0.9019 |
| 11001 | H10 | 8620  | 56965  | PARP6    | -0.0449 | 0.9019 |
| 11013 | F03 | 3754  | 9099   | USP2     | -0.0449 | 0.9019 |
| 31017 | G02 | 12789 | 6470   | SHMT1    | -0.0449 | 0.9019 |
| 11070 | E12 | 329   | 26276  | VPS33B   | -0.0448 | 0.9019 |
| 11046 | E12 | 3314  | 1933   | EEF1B2   | -0.0448 | 0.9020 |
| 11088 | B08 | 1076  | 5768   | QSOX1    | -0.0448 | 0.9020 |
| 31016 | A02 | 12429 | 1936   | EEF1D    | -0.0448 | 0.9020 |
| 11060 | A12 | 4093  | 79148  | MMP28    | -0.0448 | 0.9020 |
| 31041 | H06 | 5957  | 1655   | DDX5     | -0.0448 | 0.9020 |
| 11084 | A11 | 7033  | 84232  | MAF1     | -0.0448 | 0.9020 |
| 11003 | A10 | 9742  | 6391   | SDHC     | -0.0448 | 0.9020 |
| 11071 | E06 | 1437  | 84078  | KBTBD7   | -0.0447 | 0.9021 |
| 51029 | H09 | 56469 | 83957  | FKSG43   | -0.0447 | 0.9022 |
| 11084 | E12 | 5361  | 51073  | MRPL4    | -0.0447 | 0.9022 |
| 11024 | A10 | 4205  | 55249  | YY1AP1   | -0.0447 | 0.9022 |
| 11046 | E09 | 8941  | 80347  | COASY    | -0.0447 | 0.9023 |
| 11039 | H02 | 1720  | 152330 | CNTN4    | -0.0446 | 0.9023 |
| 11071 | C12 | 8341  | 114822 | RHPN1    | -0.0446 | 0.9023 |
| 11045 | D05 | 108   | 9275   | BCL7B    | -0.0446 | 0.9024 |
| 11083 | A04 | 1021  | 1735   | DIO3     | -0.0446 | 0.9024 |
| 31042 | G07 | 6919  | 50813  | COPS7A   | -0.0446 | 0.9025 |
| 51026 | F06 | 56916 | 3690   | ITGB3    | -0.0445 | 0.9026 |
| 11038 | D04 | 5823  | 2886   | GRB7     | -0.0445 | 0.9026 |
| 11079 | E05 | 1355  | 23395  | LARS2    | -0.0445 | 0.9027 |
| 31001 | F12 | 10709 | 283471 | TMPRSS12 | -0.0445 | 0.9027 |
| 31025 | D01 | 13391 | 10318  | TNIP1    | -0.0445 | 0.9027 |
| 31003 | D09 | 10440 | 54674  | LRRN3    | -0.0445 | 0.9027 |
| 51003 | G04 | 54699 | 1485   | CTAG1B   | -0.0444 | 0.9028 |
| 11009 | D01 | 338   | 23259  | DDHD2    | -0.0444 | 0.9028 |
| 11002 | C12 | 9500  | 93380  | MMGT1    | -0.0444 | 0.9028 |
| 51003 | D05 | 52711 | 155051 | CRYGN    | -0.0444 | 0.9029 |
| 11081 | G01 | 9147  | 84677  | DSCR8    | -0.0443 | 0.9030 |
| 11072 | A03 | 1576  | 5990   | RFX2     | -0.0443 | 0.9030 |
| 31006 | H06 | 11230 | 83786  | FRMD8    | -0.0443 | 0.9031 |
| 51002 | E09 | 52778 | 283651 | C15orf21 | -0.0443 | 0.9031 |
| 11030 | G08 | 9890  | 3123   | HLA-DRB1 | -0.0442 | 0.9031 |
| 11070 | C02 | 10206 | 89858  | SIGLEC12 | -0.0442 | 0.9032 |
| 51009 | F10 | 54835 | 80204  | FBXO11   | -0.0442 | 0.9032 |

|       |     |       |        |          |         |        |
|-------|-----|-------|--------|----------|---------|--------|
| 51029 | E10 | 55247 | 4938   | OAS1     | -0.0442 | 0.9032 |
| 11080 | H01 | 4957  | 6904   | TBCD     | -0.0442 | 0.9032 |
| 11028 | A09 | 3598  | 9802   | DAZAP2   | -0.0442 | 0.9032 |
| 11035 | A05 | 1499  | 92483  | LDHAL6B  | -0.0442 | 0.9032 |
| 11026 | H10 | 3261  | 10815  | CPLX1    | -0.0442 | 0.9032 |
| 11069 | H11 | 6512  | 7337   | UBE3A    | -0.0442 | 0.9033 |
| 11082 | A10 | 7010  | 5201   | PFDN1    | -0.0442 | 0.9033 |
| 11003 | D10 | 5681  | 8048   | CSRP3    | -0.0441 | 0.9034 |
| 51005 | A02 | 54324 | 195828 | ZNF367   | -0.0441 | 0.9034 |
| 11045 | C09 | 460   | 83549  | UCK1     | -0.0441 | 0.9035 |
| 31008 | D01 | 11752 | 170685 | NUDT10   | -0.0441 | 0.9035 |
| 11026 | A06 | 8825  | 4493   | MTIE     | -0.0440 | 0.9036 |
| 11037 | B09 | 8831  | 84720  | PIGO     | -0.0440 | 0.9037 |
| 11001 | D08 | 2765  | 79015  | LOC79015 | -0.0439 | 0.9038 |
| 31040 | A01 | 8758  | 480    | ATP1A4   | -0.0439 | 0.9038 |
| 31030 | C02 | 14466 | 5700   | PSMC1    | -0.0439 | 0.9038 |
| 31020 | B09 | 12973 | 55610  | CCDC132  | -0.0439 | 0.9038 |
| 51013 | D04 | 54987 | 150159 | NHEDC1   | -0.0439 | 0.9039 |
| 51012 | B06 | 54159 | 344805 | TMPRSS7  | -0.0439 | 0.9039 |
| 11084 | C11 | 137   | 9342   | SNAP29   | -0.0439 | 0.9039 |
| 31042 | A03 | 6624  | 84221  | C21orf56 | -0.0439 | 0.9040 |
| 11028 | E08 | 3432  | 51659  | GIN52    | -0.0438 | 0.9040 |
| 11070 | F02 | 6031  | 79796  | ALG9     | -0.0438 | 0.9040 |
| 11025 | A03 | 4383  | 8078   | USP5     | -0.0438 | 0.9041 |
| 31019 | E03 | 12838 | 10611  | PDLIM5   | -0.0438 | 0.9041 |
| 51033 | A02 | 56451 | 140832 | WFDC10A  | -0.0438 | 0.9041 |
| 51023 | E04 | 56693 | 26267  | FBXO10   | -0.0438 | 0.9042 |
| 11089 | F02 | 9285  | 4950   | OCLN     | -0.0437 | 0.9042 |
| 51035 | A09 | 54645 | 93109  | TMEM44   | -0.0437 | 0.9042 |
| 31013 | H05 | 12034 | 1646   | AKR1C2   | -0.0437 | 0.9043 |
| 51003 | A12 | 52725 | 50964  | SOST     | -0.0437 | 0.9043 |
| 11075 | D01 | 2580  | 345757 | FAM174A  | -0.0437 | 0.9043 |
| 51020 | C02 | 55808 | 162494 | RHBDL3   | -0.0437 | 0.9043 |
| 31031 | G09 | 14628 | 79922  | MRM1     | -0.0436 | 0.9045 |
| 11040 | C03 | 8552  | 23480  | SEC61G   | -0.0436 | 0.9045 |
| 11008 | H07 | 5461  | 51601  | LIPT1    | -0.0436 | 0.9045 |
| 11070 | G06 | 10213 | 23127  | GLT25D2  | -0.0436 | 0.9045 |
| 31021 | E04 | 13002 | 6906   | SERPINA7 | -0.0436 | 0.9045 |
| 31020 | F11 | 12937 | 1088   | CEACAM8  | -0.0435 | 0.9046 |
| 51006 | B11 | 55642 | 112574 | SNX18    | -0.0435 | 0.9046 |
| 11032 | B05 | 6445  | 10621  | POLR3F   | -0.0435 | 0.9046 |
| 51001 | C06 | 52908 | 285888 | CNPY1    | -0.0435 | 0.9047 |
| 11083 | F08 | 9343  | 51161  | C3orf18  | -0.0435 | 0.9047 |
| 31004 | E08 | 11049 | 84545  | MRPL43   | -0.0435 | 0.9047 |

|       |     |       |        |          |         |        |
|-------|-----|-------|--------|----------|---------|--------|
| 11078 | B04 | 7808  | 29062  | WDR91    | -0.0435 | 0.9047 |
| 11004 | E01 | 2860  | 56952  | PRTFDC1  | -0.0434 | 0.9049 |
| 31028 | C07 | 14182 | 64135  | IFIH1    | -0.0434 | 0.9049 |
| 51025 | B09 | 56210 | 4293   | MAP3K9   | -0.0434 | 0.9050 |
| 31038 | G01 | 14724 | 138241 | C9orf85  | -0.0434 | 0.9050 |
| 31038 | A05 | 14611 | 1571   | CYP2E1   | -0.0434 | 0.9050 |
| 31042 | F04 | 5007  | 84277  | DNAJC30  | -0.0433 | 0.9050 |
| 11009 | E02 | 6725  | 57332  | CBX8     | -0.0433 | 0.9051 |
| 11064 | F09 | 7360  | 6916   | TBXAS1   | -0.0433 | 0.9052 |
| 11040 | H03 | 8944  | 27130  | INVS     | -0.0432 | 0.9053 |
| 51004 | D03 | 52811 | 200909 | HTR3D    | -0.0432 | 0.9053 |
| 11043 | E02 | 4865  | 93659  | CGB5     | -0.0432 | 0.9053 |
| 31044 | D08 | 10067 | 11234  | HPS5     | -0.0432 | 0.9054 |
| 11061 | A12 | 1952  | 1527   | TEX28    | -0.0432 | 0.9054 |
| 11001 | G07 | 2746  | 28972  | SPCS1    | -0.0431 | 0.9054 |
| 31039 | G11 | 5380  | 55764  | IFT122   | -0.0431 | 0.9055 |
| 31003 | A05 | 10661 | 152789 | JAKMIP1  | -0.0431 | 0.9056 |
| 11027 | D12 | 8599  | 55959  | SULF2    | -0.0431 | 0.9056 |
| 11070 | D08 | 9260  | 79767  | ELMO3    | -0.0431 | 0.9056 |
| 11068 | H08 | 7046  | 55037  | PTCD3    | -0.0430 | 0.9057 |
| 31041 | D11 | 4223  | 79413  | ZBED2    | -0.0430 | 0.9057 |
| 51014 | H10 | 53021 | 2957   | GTF2A1   | -0.0430 | 0.9057 |
| 11058 | A10 | 7311  | 91252  | SLC39A13 | -0.0430 | 0.9057 |
| 51006 | D07 | 54516 | 79989  | TTC26    | -0.0430 | 0.9057 |
| 11009 | F01 | 3651  | 9827   | RGP1     | -0.0429 | 0.9058 |
| 31029 | D05 | 14234 | 10903  | MTMR11   | -0.0429 | 0.9059 |
| 11032 | F04 | 9584  | 51548  | SIRT6    | -0.0429 | 0.9059 |
| 11003 | G04 | 8589  | 84895  | FAM73B   | -0.0429 | 0.9059 |
| 51032 | C08 | 55967 | 474382 | H2AFB1   | -0.0429 | 0.9059 |
| 11038 | C07 | 5876  | 9128   | PRPF4    | -0.0429 | 0.9059 |
| 51001 | E08 | 54935 | 5197   | PF4V1    | -0.0429 | 0.9060 |
| 31032 | F05 | 14545 | 23092  | ARHGAP26 | -0.0429 | 0.9060 |
| 11024 | H05 | 9986  | 2009   | EML1     | -0.0428 | 0.9061 |
| 11058 | D09 | 968   | 29968  | PSAT1    | -0.0428 | 0.9061 |
| 31042 | H03 | 6283  | 3821   | KLRC1    | -0.0428 | 0.9062 |
| 11020 | D01 | 5051  | 84303  | CHCHD6   | -0.0428 | 0.9062 |
| 31017 | D04 | 12639 | 3500   | IGHG1    | -0.0427 | 0.9063 |
| 31014 | B03 | 12024 | 81545  | FBXO38   | -0.0427 | 0.9063 |
| 11013 | A07 | 6024  | 2962   | GTF2F1   | -0.0427 | 0.9063 |
| 31001 | D02 | 10254 | 10476  | ATP5H    | -0.0427 | 0.9064 |
| 11078 | H06 | 6170  | 2036   | EPB41L1  | -0.0426 | 0.9065 |
| 51026 | B12 | 56929 | 57715  | SEMA4G   | -0.0426 | 0.9066 |
| 51022 | H06 | 56650 | 8749   | ADAM18   | -0.0426 | 0.9066 |
| 11005 | D08 | 1892  | 221687 | RNF182   | -0.0426 | 0.9066 |

|       |     |       |        |            |         |        |
|-------|-----|-------|--------|------------|---------|--------|
| 51015 | B04 | 52687 | 50650  | ARHGEF3    | -0.0426 | 0.9066 |
| 51017 | E02 | 56613 | 4061   | LY6E       | -0.0426 | 0.9067 |
| 11054 | F03 | 2026  | 91544  | UBXN11     | -0.0425 | 0.9067 |
| 31041 | G05 | 6713  | 80021  | TMEM62     | -0.0425 | 0.9067 |
| 11019 | E12 | 7636  | 200420 | ALMS1P     | -0.0425 | 0.9067 |
| 11055 | F05 | 5156  | 30815  | ST6GALNAC6 | -0.0425 | 0.9067 |
| 11004 | E06 | 504   | 2706   | GJB2       | -0.0425 | 0.9067 |
| 51033 | F07 | 54136 | 219348 | PLAC9      | -0.0425 | 0.9068 |
| 11075 | E03 | 2524  | 10857  | PGRMC1     | -0.0424 | 0.9069 |
| 11078 | A07 | 7142  | 9610   | RIN1       | -0.0424 | 0.9069 |
| 11067 | E11 | 1333  | 526    | ATP6V1B2   | -0.0424 | 0.9069 |
| 11045 | C10 | 9253  | 2978   | GUCA1A     | -0.0424 | 0.9070 |
| 31028 | E11 | 14141 | 80208  | SPG11      | -0.0424 | 0.9070 |
| 51024 | A04 | 55185 | 56946  | C11orf30   | -0.0424 | 0.9071 |
| 31040 | B05 | 10184 | 149840 | C20orf196  | -0.0423 | 0.9072 |
| 11080 | A09 | 7339  | 7297   | TYK2       | -0.0423 | 0.9072 |
| 11073 | H03 | 4397  | 79170  | PRR15L     | -0.0423 | 0.9072 |
| 11083 | E07 | 8764  | 91653  | BOC        | -0.0423 | 0.9072 |
| 11070 | A02 | 1942  | 56474  | CTPS2      | -0.0423 | 0.9073 |
| 11059 | E01 | 2291  | 23620  | NTSR2      | -0.0423 | 0.9073 |
| 11083 | C01 | 1150  | 158046 | NXNL2      | -0.0422 | 0.9073 |
| 31037 | H03 | 12412 | 3843   | IPO5       | -0.0422 | 0.9074 |
| 11038 | G04 | 5910  | 1621   | DBH        | -0.0421 | 0.9075 |
| 11022 | C04 | 7721  | 28513  | CDH19      | -0.0421 | 0.9075 |
| 31029 | H05 | 14191 | 9731   | KIAA0562   | -0.0421 | 0.9076 |
| 11016 | H01 | 6370  | 29058  | C20orf30   | -0.0421 | 0.9076 |
| 11066 | G10 | 7086  | 1196   | CLK2       | -0.0421 | 0.9076 |
| 31008 | F05 | 11537 | 149986 | LSM14B     | -0.0421 | 0.9076 |
| 51015 | E04 | 53125 | 83795  | KCNK16     | -0.0421 | 0.9077 |
| 31012 | C06 | 12208 | 51290  | ERGIC2     | -0.0420 | 0.9077 |
| 11076 | G07 | 4469  | 5174   | PDZK1      | -0.0420 | 0.9078 |
| 11054 | C05 | 343   | 7965   | AIMP2      | -0.0420 | 0.9079 |
| 11025 | G10 | 2357  | 23228  | PLCL2      | -0.0419 | 0.9079 |
| 51026 | F04 | 55965 | 283455 | KSR2       | -0.0419 | 0.9080 |
| 11002 | A07 | 477   | 8724   | SNX3       | -0.0419 | 0.9080 |
| 11046 | G11 | 2657  | 8609   | KLF7       | -0.0419 | 0.9080 |
| 11052 | A02 | 3469  | 1017   | CDK2       | -0.0419 | 0.9080 |
| 11017 | G01 | 6350  | 3047   | HBG1       | -0.0419 | 0.9080 |
| 51006 | D12 | 54298 | 9154   | SLC28A1    | -0.0419 | 0.9081 |
| 11043 | E01 | 6482  | 130340 | AP1S3      | -0.0418 | 0.9082 |
| 11066 | F10 | 9333  | 80704  | SLC19A3    | -0.0418 | 0.9082 |
| 11005 | A06 | 5440  | 1908   | EDN3       | -0.0418 | 0.9083 |
| 51013 | G07 | 53136 | 57217  | TTC7A      | -0.0417 | 0.9084 |
| 11079 | C01 | 1920  | 23660  | ZKSCAN5    | -0.0417 | 0.9084 |

|       |     |       |        |           |         |        |
|-------|-----|-------|--------|-----------|---------|--------|
| 11080 | H11 | 4289  | 2956   | MSH6      | -0.0417 | 0.9084 |
| 11067 | H07 | 1279  | 4129   | MAOB      | -0.0417 | 0.9085 |
| 11040 | E12 | 8949  | 23085  | ERC1      | -0.0417 | 0.9085 |
| 51021 | G05 | 55829 | 10794  | ZNF460    | -0.0416 | 0.9086 |
| 31001 | A10 | 10538 | 119392 | C10orf78  | -0.0416 | 0.9086 |
| 51008 | E04 | 53533 | 3918   | LAMC2     | -0.0416 | 0.9086 |
| 11051 | E12 | 2127  | 3131   | HLF       | -0.0416 | 0.9086 |
| 11055 | A02 | 1444  | 285237 | C3orf38   | -0.0416 | 0.9087 |
| 51006 | G05 | 53450 | 847    | CAT       | -0.0416 | 0.9087 |
| 31005 | B10 | 10861 | 84061  | MAGT1     | -0.0415 | 0.9088 |
| 11043 | H11 | 7326  | 81888  | HYI       | -0.0415 | 0.9088 |
| 51001 | A11 | 52608 | 283982 | C17orf54  | -0.0415 | 0.9089 |
| 11055 | D07 | 5890  | 80212  | CCDC92    | -0.0415 | 0.9089 |
| 51029 | C06 | 56458 | 1814   | DRD3      | -0.0414 | 0.9090 |
| 31024 | D10 | 13437 | 6242   | RTKN      | -0.0414 | 0.9090 |
| 31018 | A01 | 13157 | 137196 | CCDC26    | -0.0414 | 0.9091 |
| 51006 | D01 | 53860 | 58524  | DMRT3     | -0.0414 | 0.9091 |
| 11087 | A04 | 7582  | 5127   | CDK16     | -0.0414 | 0.9091 |
| 11015 | C02 | 5500  | 4502   | MT2A      | -0.0414 | 0.9091 |
| 11030 | B05 | 3180  | 8260   | NAA10     | -0.0414 | 0.9092 |
| 51020 | A11 | 56589 | 1559   | CYP2C9    | -0.0413 | 0.9092 |
| 11088 | H05 | 9556  | 284521 | OR2L13    | -0.0413 | 0.9093 |
| 51002 | D09 | 54714 | 493901 | RNASE12   | -0.0413 | 0.9093 |
| 31042 | D07 | 5519  | 10556  | RPP30     | -0.0413 | 0.9093 |
| 31006 | G11 | 10967 | 11001  | SLC27A2   | -0.0413 | 0.9094 |
| 31031 | B11 | 14593 | 11250  | GPR45     | -0.0413 | 0.9094 |
| 31004 | E01 | 10487 | 2913   | GRM3      | -0.0413 | 0.9094 |
| 31023 | E05 | 13637 | 5699   | PSMB10    | -0.0412 | 0.9094 |
| 11037 | E07 | 8067  | 23624  | CBLC      | -0.0412 | 0.9095 |
| 31009 | B03 | 11774 | 51105  | PHF20L1   | -0.0412 | 0.9095 |
| 51027 | H05 | 53170 | 84342  | COG8      | -0.0412 | 0.9095 |
| 11042 | E10 | 6787  | 56993  | TOMM22    | -0.0412 | 0.9096 |
| 11059 | C01 | 9897  | 55803  | ADAP2     | -0.0411 | 0.9096 |
| 51023 | B03 | 56187 | 1663   | DDX11     | -0.0411 | 0.9096 |
| 11083 | E05 | 696   | 79669  | C3orf52   | -0.0411 | 0.9096 |
| 11039 | F10 | 8070  | 3796   | KIF2A     | -0.0411 | 0.9096 |
| 11030 | C11 | 6477  | 7172   | TPMT      | -0.0411 | 0.9096 |
| 31038 | E05 | 14287 | 5430   | POLR2A    | -0.0411 | 0.9096 |
| 11079 | F03 | 3202  | 8940   | TOP3B     | -0.0411 | 0.9096 |
| 31017 | B04 | 12721 | 3500   | IGHG1     | -0.0411 | 0.9097 |
| 31030 | E12 | 14453 | 64151  | NCAPG     | -0.0411 | 0.9097 |
| 11079 | D02 | 2081  | 143689 | PIWIL4    | -0.0411 | 0.9098 |
| 11083 | D03 | 1616  | 441046 | LOC441046 | -0.0411 | 0.9098 |
| 51023 | G05 | 54374 | 93649  | MYOCD     | -0.0410 | 0.9098 |



|       |     |       |        |            |         |        |
|-------|-----|-------|--------|------------|---------|--------|
| 31011 | H07 | 12203 | 159091 | FAM122C    | -0.0410 | 0.9098 |
| 51023 | F09 | 56064 | 9101   | USP8       | -0.0410 | 0.9099 |
| 11012 | E02 | 4264  | 7205   | TRIP6      | -0.0410 | 0.9099 |
| 11019 | F09 | 9161  | 80321  | CEP70      | -0.0410 | 0.9099 |
| 51013 | E08 | 54051 | 51091  | SEPSECS    | -0.0410 | 0.9099 |
| 51001 | E05 | 52650 | 27290  | SPINK4     | -0.0410 | 0.9099 |
| 31005 | H07 | 10862 | 256435 | ST6GALNAC3 | -0.0410 | 0.9100 |
| 31026 | D02 | 14017 | 2695   | GIP        | -0.0410 | 0.9100 |
| 11055 | B02 | 4096  | 770    | CA11       | -0.0410 | 0.9100 |
| 31025 | D04 | 13611 | 9819   | TSC22D2    | -0.0410 | 0.9100 |
| 31002 | A04 | 10462 | 84991  | RBM17      | -0.0409 | 0.9100 |
| 11040 | A02 | 5334  | 84973  | SNHG7      | -0.0409 | 0.9102 |
| 51029 | B05 | 55512 | 201243 | C17orf74   | -0.0409 | 0.9102 |
| 11017 | C08 | 9107  | 79148  | MMP28      | -0.0408 | 0.9103 |
| 11037 | D01 | 3139  | 10856  | RUVBL2     | -0.0408 | 0.9104 |
| 11034 | D03 | 8763  | 29028  | ATAD2      | -0.0408 | 0.9104 |
| 11087 | H09 | 1801  | 54529  | ASNSD1     | -0.0408 | 0.9104 |
| 11047 | E09 | 5335  | 5373   | PMM2       | -0.0408 | 0.9104 |
| 31022 | C06 | 13544 | 118429 | ANTXR2     | -0.0408 | 0.9104 |
| 11012 | B10 | 6849  | 1431   | CS         | -0.0407 | 0.9104 |
| 51009 | B09 | 53102 | 4306   | NR3C2      | -0.0407 | 0.9105 |
| 31012 | D01 | 11918 | 138241 | C9orf85    | -0.0407 | 0.9105 |
| 51010 | A11 | 54957 | 159195 | USP54      | -0.0407 | 0.9105 |
| 51013 | B09 | 52737 | 66035  | SLC2A11    | -0.0407 | 0.9105 |
| 31003 | D05 | 10618 | 23390  | ZDHHC17    | -0.0407 | 0.9106 |
| 11022 | B03 | 7790  | 2319   | FLOT2      | -0.0407 | 0.9106 |
| 11030 | C12 | 10246 | 144608 | C12orf60   | -0.0407 | 0.9106 |
| 31013 | A09 | 12331 | 25875  | LETMD1     | -0.0406 | 0.9108 |
| 31008 | D07 | 11645 | 4817   | NIT1       | -0.0406 | 0.9108 |
| 31038 | B12 | 9960  | 284406 | ZFP82      | -0.0406 | 0.9108 |
| 11026 | E01 | 8434  | 116349 | C5orf55    | -0.0406 | 0.9108 |
| 51032 | D08 | 55517 | 132720 | C4orf32    | -0.0406 | 0.9108 |
| 51005 | G10 | 54162 | 168975 | CNBD1      | -0.0406 | 0.9108 |
| 11006 | E04 | 9092  | 23001  | WDFY3      | -0.0405 | 0.9109 |
| 11043 | C01 | 8951  | 84775  | ZNF607     | -0.0405 | 0.9109 |
| 31039 | G05 | 2851  | 54494  | C11orf71   | -0.0405 | 0.9109 |
| 31017 | H07 | 12888 | 439935 | MGC24125   | -0.0405 | 0.9109 |
| 51028 | E09 | 56397 | 6524   | SLC5A2     | -0.0405 | 0.9109 |
| 11038 | E11 | 5908  | 10801  | SEPT9      | -0.0405 | 0.9109 |
| 11039 | F01 | 2359  | 5579   | PRKCB      | -0.0405 | 0.9110 |
| 31036 | F03 | 11083 | 63979  | FIGNL1     | -0.0405 | 0.9110 |
| 11055 | E07 | 2412  | 6484   | ST3GAL4    | -0.0404 | 0.9111 |
| 31016 | G09 | 12791 | 79848  | CSPP1      | -0.0404 | 0.9111 |
| 11027 | A10 | 107   | 5216   | PFN1       | -0.0404 | 0.9111 |

|       |     |       |        |          |         |        |
|-------|-----|-------|--------|----------|---------|--------|
| 11083 | C10 | 9448  | 84691  | FAM71F1  | -0.0404 | 0.9112 |
| 11025 | B09 | 5089  | 57231  | SNX14    | -0.0404 | 0.9112 |
| 11062 | E04 | 1876  | 1983   | EIF5     | -0.0403 | 0.9113 |
| 51009 | G05 | 54015 | 54828  | BCAS3    | -0.0403 | 0.9113 |
| 51005 | H08 | 53737 | 8419   | BFSP2    | -0.0403 | 0.9114 |
| 51033 | E12 | 53464 | 113444 | C1orf212 | -0.0403 | 0.9114 |
| 11006 | A10 | 3998  | 5692   | PSMB4    | -0.0403 | 0.9114 |
| 11087 | D03 | 1614  | 51167  | CYB5R4   | -0.0402 | 0.9115 |
| 11066 | C11 | 6923  | 54815  | GATAD2A  | -0.0402 | 0.9115 |
| 51032 | E07 | 53201 | 401508 | FAM74A4  | -0.0402 | 0.9115 |
| 11082 | C05 | 2858  | 26292  | MYCBP    | -0.0402 | 0.9115 |
| 11074 | E07 | 5498  | 26578  | OSTF1    | -0.0402 | 0.9116 |
| 11048 | B04 | 8164  | 1149   | CIDEA    | -0.0402 | 0.9116 |
| 31006 | F01 | 11036 | 339010 | POTEB    | -0.0401 | 0.9117 |
| 51012 | G02 | 54749 | 29974  | A1CF     | -0.0401 | 0.9117 |
| 31017 | A11 | 13048 | 1401   | CRP      | -0.0401 | 0.9118 |
| 11075 | B12 | 5598  | 2641   | GCG      | -0.0401 | 0.9119 |
| 11061 | E09 | 4216  | 57136  | C20orf3  | -0.0401 | 0.9119 |
| 51028 | C09 | 55671 | 377841 | ENTPD8   | -0.0401 | 0.9119 |
| 11049 | H09 | 413   | 573    | BAG1     | -0.0400 | 0.9120 |
| 11030 | E12 | 4255  | 29844  | TFPT     | -0.0400 | 0.9120 |
| 11075 | B05 | 4191  | 51128  | SAR1B    | -0.0400 | 0.9120 |
| 11080 | F06 | 7471  | 23367  | LARP1    | -0.0400 | 0.9121 |
| 51020 | F11 | 56802 | 1589   | CYP21A2  | -0.0400 | 0.9121 |
| 11047 | C10 | 6546  | 203286 | ANKS6    | -0.0399 | 0.9121 |
| 51035 | G07 | 53705 | 220296 | HEPACAM  | -0.0399 | 0.9121 |
| 51028 | H10 | 7051  | 23197  | FAF2     | -0.0399 | 0.9122 |
| 11039 | E04 | 7001  | 1654   | DDX3X    | -0.0399 | 0.9122 |
| 11014 | F03 | 2719  | 10483  | SEC23B   | -0.0399 | 0.9122 |
| 11035 | D05 | 9421  | 55064  | C9orf68  | -0.0399 | 0.9122 |
| 11032 | D08 | 8351  | 7005   | TEAD3    | -0.0399 | 0.9123 |
| 31021 | B04 | 12994 | 9690   | UBE3C    | -0.0399 | 0.9123 |
| 31023 | E10 | 13563 | 55739  | CARKD    | -0.0398 | 0.9125 |
| 11006 | D11 | 4100  | 79152  | FA2H     | -0.0398 | 0.9125 |
| 11012 | G07 | 8289  | 1071   | CETP     | -0.0397 | 0.9125 |
| 51011 | E06 | 54920 | 3067   | HDC      | -0.0397 | 0.9126 |
| 11072 | H05 | 8112  | 56126  | PCDHB10  | -0.0397 | 0.9126 |
| 11001 | E05 | 762   | 7388   | UQCRH    | -0.0397 | 0.9126 |
| 11027 | E11 | 3604  | 81873  | ARPC5L   | -0.0397 | 0.9127 |
| 11018 | F04 | 9048  | 85464  | SSH2     | -0.0397 | 0.9127 |
| 11075 | C11 | 4850  | 84309  | NUDT16L1 | -0.0397 | 0.9127 |
| 11012 | C08 | 6495  | 25813  | SAMM50   | -0.0396 | 0.9128 |
| 11028 | C05 | 3259  | 51673  | TPPP3    | -0.0396 | 0.9128 |
| 31023 | B09 | 13508 | 246330 | PELI3    | -0.0396 | 0.9129 |

|       |     |       |        |           |         |        |
|-------|-----|-------|--------|-----------|---------|--------|
| 31020 | E11 | 13233 | 3070   | HELLS     | -0.0396 | 0.9129 |
| 11036 | F08 | 3556  | 3275   | PRMT2     | -0.0395 | 0.9130 |
| 51028 | A08 | 55320 | 115399 | LRRC56    | -0.0395 | 0.9130 |
| 51003 | H04 | 52891 | 9464   | HAND2     | -0.0394 | 0.9132 |
| 31039 | F07 | 929   | 57826  | RAP2C     | -0.0394 | 0.9132 |
| 11038 | E02 | 5319  | 7203   | CCT3      | -0.0394 | 0.9133 |
| 11067 | E10 | 410   | 280    | AMY2B     | -0.0394 | 0.9133 |
| 31021 | A04 | 13074 | 177    | AGER      | -0.0393 | 0.9134 |
| 11067 | H05 | 7898  | 23392  | KIAA0368  | -0.0393 | 0.9134 |
| 11043 | A05 | 921   | 6208   | RPS14     | -0.0393 | 0.9134 |
| 11010 | G04 | 3405  | 3590   | IL11RA    | -0.0393 | 0.9135 |
| 11028 | H11 | 5464  | 25816  | TNFAIP8   | -0.0393 | 0.9135 |
| 11065 | E07 | 3022  | 950    | SCARB2    | -0.0393 | 0.9135 |
| 31019 | G09 | 13283 | 10436  | EMG1      | -0.0393 | 0.9135 |
| 11057 | E03 | 9286  | 1232   | CCR3      | -0.0393 | 0.9135 |
| 11081 | G04 | 4008  | 10975  | UQCR11    | -0.0393 | 0.9135 |
| 11059 | F02 | 10207 | 57118  | CAMK1D    | -0.0393 | 0.9135 |
| 11072 | H08 | 2495  | 126133 | ALDH16A1  | -0.0393 | 0.9135 |
| 11055 | B06 | 790   | 54984  | PINX1     | -0.0392 | 0.9136 |
| 51029 | E08 | 55427 | 284656 | EPHA10    | -0.0392 | 0.9136 |
| 11001 | E09 | 341   | 147525 | C18orf18  | -0.0392 | 0.9136 |
| 11019 | A08 | 6488  | 5881   | RAC3      | -0.0392 | 0.9136 |
| 11038 | E09 | 5249  | 8659   | ALDH4A1   | -0.0392 | 0.9137 |
| 11078 | E02 | 6471  | 23205  | ACSBG1    | -0.0392 | 0.9137 |
| 11017 | B03 | 9101  | 10681  | GNB5      | -0.0392 | 0.9138 |
| 11080 | D07 | 4775  | 5424   | POLD1     | -0.0392 | 0.9138 |
| 51031 | E09 | 893   | 6756   | SSX1      | -0.0392 | 0.9138 |
| 31003 | A07 | 10665 | 51809  | GALNT7    | -0.0391 | 0.9138 |
| 51020 | B04 | 55811 | 55370  | PPP4R1L   | -0.0391 | 0.9138 |
| 11053 | E04 | 4319  | 9424   | KCNK6     | -0.0390 | 0.9140 |
| 11037 | G08 | 9441  | 7535   | ZAP70     | -0.0390 | 0.9141 |
| 31043 | B01 | 5086  | 80227  | PAAF1     | -0.0390 | 0.9141 |
| 31009 | F05 | 11434 | 286530 | P2RY8     | -0.0390 | 0.9141 |
| 11004 | F05 | 2898  | 113178 | SCAMP4    | -0.0390 | 0.9142 |
| 11068 | B09 | 5175  | 84988  | PPP1R16A  | -0.0389 | 0.9142 |
| 31015 | A09 | 12802 | 1579   | CYP4A11   | -0.0389 | 0.9142 |
| 11006 | D10 | 5524  | 10456  | HAX1      | -0.0389 | 0.9143 |
| 51008 | G04 | 53681 | 134957 | STXBP5    | -0.0389 | 0.9143 |
| 31014 | D04 | 12092 | 374403 | TBC1D10C  | -0.0389 | 0.9144 |
| 11078 | B07 | 7168  | 899    | CCNF      | -0.0389 | 0.9144 |
| 31039 | D01 | 3345  | 10634  | GAS2L1    | -0.0388 | 0.9144 |
| 11056 | C06 | 8359  | 80125  | CCDC33    | -0.0388 | 0.9144 |
| 31001 | F11 | 10308 | 442670 | LOC442670 | -0.0388 | 0.9145 |
| 11050 | A12 | 2150  | 221421 | RSPH9     | -0.0388 | 0.9145 |

|       |     |       |           |          |         |        |
|-------|-----|-------|-----------|----------|---------|--------|
| 51016 | C02 | 53462 | 96626     | LIMS3    | -0.0388 | 0.9145 |
| 51028 | E12 | 55438 | 100132979 | GOLGA8DP | -0.0388 | 0.9146 |
| 31018 | D04 | 12842 | 7178      | TPT1     | -0.0388 | 0.9146 |
| 31043 | H07 | 7677  | 221504    | ZBTB9    | -0.0388 | 0.9146 |
| 11061 | H06 | 4519  | 29926     | GMPPA    | -0.0388 | 0.9146 |
| 11088 | F02 | 5583  | 54819     | ZCCHC10  | -0.0387 | 0.9147 |
| 51008 | A03 | 56866 | 89910     | UBE3B    | -0.0387 | 0.9147 |
| 11042 | A02 | 3346  | 92815     | HIST3H2A | -0.0387 | 0.9147 |
| 11062 | G11 | 2014  | 92283     | ZNF461   | -0.0387 | 0.9147 |
| 31017 | G01 | 12634 | 64744     | SMAP2    | -0.0387 | 0.9147 |
| 11028 | G05 | 6764  | 65988     | ZNF747   | -0.0387 | 0.9147 |
| 31039 | H07 | 8818  | 23245     | ASTN2    | -0.0387 | 0.9148 |
| 51012 | E06 | 55006 | 256957    | C17orf66 | -0.0386 | 0.9149 |
| 11064 | C12 | 5125  | 7376      | NR1H2    | -0.0386 | 0.9150 |
| 11071 | E03 | 9832  | 56924     | PAK6     | -0.0385 | 0.9151 |
| 11052 | H09 | 736   | 64853     | AIDA     | -0.0385 | 0.9151 |
| 31044 | B03 | 3350  | 348       | APOE     | -0.0385 | 0.9151 |
| 51020 | F03 | 56450 | 5801      | PTPRR    | -0.0385 | 0.9151 |
| 51004 | A06 | 53610 | 1038      | CDR1     | -0.0385 | 0.9151 |
| 51006 | E11 | 53958 | 114134    | SLC2A13  | -0.0385 | 0.9152 |
| 11004 | C05 | 662   | 6648      | SOD2     | -0.0385 | 0.9152 |
| 11080 | A12 | 1967  | 22981     | NINL     | -0.0385 | 0.9152 |
| 11075 | A03 | 9007  | 4361      | MRE11A   | -0.0384 | 0.9154 |
| 11010 | B12 | 3725  | 10206     | TRIM13   | -0.0384 | 0.9154 |
| 11045 | E05 | 9899  | 128434    | VSTM2L   | -0.0384 | 0.9154 |
| 11086 | A03 | 8311  | 9630      | GNA14    | -0.0384 | 0.9155 |
| 51008 | D01 | 55202 | 540       | ATP7B    | -0.0383 | 0.9155 |
| 11087 | G07 | 7661  | 3507      | IGHM     | -0.0383 | 0.9155 |
| 11008 | A05 | 6516  | 3726      | JUNB     | -0.0383 | 0.9156 |
| 11020 | E01 | 3958  | 7106      | TSPAN4   | -0.0383 | 0.9157 |
| 11084 | E04 | 9711  | 23125     | CAMTA2   | -0.0382 | 0.9158 |
| 11077 | E01 | 1034  | 57102     | C12orf4  | -0.0382 | 0.9158 |
| 51026 | H10 | 55678 | 11194     | ABCB8    | -0.0382 | 0.9158 |
| 31040 | H03 | 9916  | 2207      | FCER1G   | -0.0382 | 0.9159 |
| 11008 | D02 | 3035  | 54491     | FAM105A  | -0.0381 | 0.9160 |
| 11007 | D05 | 1799  | 5307      | PITX1    | -0.0381 | 0.9160 |
| 31025 | A01 | 13674 | 2147      | F2       | -0.0381 | 0.9161 |
| 51026 | G05 | 53308 | 1804      | DPP6     | -0.0381 | 0.9161 |
| 11063 | E10 | 4941  | 4247      | MGAT2    | -0.0381 | 0.9161 |
| 51006 | D11 | 54053 | 112574    | SNX18    | -0.0381 | 0.9161 |
| 51032 | E01 | 55337 | 114827    | FHAD1    | -0.0381 | 0.9161 |
| 11011 | G02 | 3103  | 27175     | TUBG2    | -0.0380 | 0.9162 |
| 11019 | F02 | 9055  | 51322     | WAC      | -0.0380 | 0.9162 |
| 51003 | D09 | 54983 | 400511    | FLJ45256 | -0.0380 | 0.9162 |

|       |     |       |        |            |         |        |
|-------|-----|-------|--------|------------|---------|--------|
| 31029 | B09 | 14351 | NA     | NA         | -0.0380 | 0.9162 |
| 11029 | B03 | 4727  | 83755  | KRTAP4-12  | -0.0380 | 0.9163 |
| 51027 | E12 | 53382 | 203190 | LGI3       | -0.0380 | 0.9163 |
| 31026 | H06 | 13888 | 4084   | MXD1       | -0.0380 | 0.9163 |
| 31040 | B08 | 10118 | 92170  | MTG1       | -0.0380 | 0.9163 |
| 11063 | C02 | 10011 | 7289   | TULP3      | -0.0379 | 0.9163 |
| 51004 | C04 | 53825 | 283165 | PRR10      | -0.0379 | 0.9164 |
| 11028 | E07 | 3347  | 4201   | MEA1       | -0.0379 | 0.9164 |
| 51012 | E04 | 55098 | 731    | C8A        | -0.0379 | 0.9164 |
| 11018 | H06 | 9063  | 55788  | LMBRD1     | -0.0379 | 0.9165 |
| 11003 | E08 | 9047  | 81559  | TRIM11     | -0.0379 | 0.9165 |
| 11055 | C11 | 8611  | 51061  | TXNDC11    | -0.0378 | 0.9165 |
| 51033 | G02 | 56945 | 284184 | C17orf89   | -0.0378 | 0.9166 |
| 11081 | E12 | 1192  | 91368  | CDKN2AIPNL | -0.0378 | 0.9166 |
| 51013 | E01 | 55004 | 248    | ALPI       | -0.0378 | 0.9166 |
| 11070 | A04 | 9681  | 1407   | CRY1       | -0.0378 | 0.9167 |
| 11088 | D09 | 1088  | 64283  | RGNEF      | -0.0377 | 0.9167 |
| 31005 | F10 | 11154 | 65061  | CDK15      | -0.0377 | 0.9169 |
| 31004 | C10 | 11022 | 119180 | LYZL2      | -0.0377 | 0.9169 |
| 11015 | C12 | 5333  | 85009  | MGC16025   | -0.0376 | 0.9170 |
| 31045 | G03 | 4962  | 51512  | GTSE1      | -0.0376 | 0.9171 |
| 11060 | B06 | 4057  | 1846   | DUSP4      | -0.0376 | 0.9171 |
| 51014 | G08 | 52780 | 254187 | TSGA10IP   | -0.0376 | 0.9172 |
| 31007 | A09 | 12070 | 23178  | PASK       | -0.0375 | 0.9172 |
| 51008 | C08 | 53918 | 316    | AOX1       | -0.0375 | 0.9172 |
| 11024 | F07 | 3224  | 6774   | STAT3      | -0.0375 | 0.9172 |
| 31018 | B03 | 12858 | 5359   | PLSCR1     | -0.0375 | 0.9172 |
| 51015 | H08 | 53039 | 670    | BPHL       | -0.0375 | 0.9173 |
| 51013 | A10 | 52703 | 51380  | CSAD       | -0.0375 | 0.9173 |
| 31006 | D03 | 11020 | 347918 | EP400NL    | -0.0375 | 0.9173 |
| 31031 | E02 | 14475 | 9502   | XAGE2      | -0.0375 | 0.9173 |
| 11057 | G05 | 1064  | 2553   | GABPB1     | -0.0375 | 0.9173 |
| 51029 | G01 | 53163 | 219899 | TBCEL      | -0.0375 | 0.9174 |
| 11057 | E04 | 7369  | 79577  | CDC73      | -0.0374 | 0.9174 |
| 11046 | F12 | 2604  | 60685  | ZFAND3     | -0.0374 | 0.9175 |
| 11053 | H06 | 3120  | 10399  | GNB2L1     | -0.0374 | 0.9175 |
| 11020 | D08 | 5364  | 84259  | DCUN1D5    | -0.0374 | 0.9175 |
| 51029 | B02 | 55662 | 400566 | C17orf97   | -0.0374 | 0.9175 |
| 11007 | D08 | 4028  | 6175   | RPLP0      | -0.0374 | 0.9175 |
| 11001 | B06 | 144   | 4707   | NDUFB1     | -0.0374 | 0.9175 |
| 11051 | E05 | 2865  | 6423   | SFRP2      | -0.0374 | 0.9176 |
| 11047 | D02 | 9162  | 83932  | C1orf124   | -0.0374 | 0.9176 |
| 11017 | A08 | 6972  | 64968  | MRPS6      | -0.0374 | 0.9176 |
| 11071 | F07 | 1889  | 26234  | FBXL5      | -0.0374 | 0.9176 |

|       |     |       |        |          |         |        |
|-------|-----|-------|--------|----------|---------|--------|
| 31034 | F02 | 14937 | 441521 | CT45A5   | -0.0373 | 0.9177 |
| 11089 | D03 | 1108  | 3937   | LCP2     | -0.0373 | 0.9177 |
| 31034 | C07 | 14911 | 5446   | PON3     | -0.0372 | 0.9178 |
| 11072 | G11 | 7965  | 55737  | VPS35    | -0.0372 | 0.9179 |
| 11029 | D04 | 7156  | 64782  | AEN      | -0.0372 | 0.9179 |
| 31026 | A01 | 14006 | 796    | CALCA    | -0.0372 | 0.9179 |
| 31028 | H09 | 14163 | 57496  | MKL2     | -0.0372 | 0.9180 |
| 31038 | F04 | 14259 | 10048  | RANBP9   | -0.0372 | 0.9180 |
| 11058 | G02 | 8206  | 54751  | FBLIM1   | -0.0371 | 0.9180 |
| 31022 | B07 | 13413 | 84331  | FAM195A  | -0.0371 | 0.9180 |
| 51034 | A11 | 53871 | 26538  | OR10H2   | -0.0371 | 0.9181 |
| 11046 | H01 | 8303  | 81618  | ITM2C    | -0.0371 | 0.9181 |
| 51028 | E01 | 55282 | 10841  | FTCD     | -0.0371 | 0.9181 |
| 11072 | F02 | 1769  | 117144 | CATSPER1 | -0.0371 | 0.9182 |
| 11042 | B12 | 8946  | 5098   | PCDHGC3  | -0.0370 | 0.9183 |
| 11045 | E01 | 6679  | 1398   | CRK      | -0.0370 | 0.9183 |
| 11063 | F01 | 1181  | 11006  | LILRB4   | -0.0370 | 0.9183 |
| 51008 | E07 | 53461 | 9640   | ZNF592   | -0.0370 | 0.9183 |
| 11008 | H10 | 7037  | 2752   | GLUL     | -0.0370 | 0.9184 |
| 11070 | E05 | 9254  | 164592 | CCDC116  | -0.0370 | 0.9184 |
| 11078 | B01 | 6073  | 9188   | DDX21    | -0.0370 | 0.9184 |
| 11021 | F11 | 3437  | 9783   | RIMS3    | -0.0369 | 0.9185 |
| 11071 | C08 | 8505  | 26137  | ZBTB20   | -0.0369 | 0.9185 |
| 11029 | H05 | 10033 | 6629   | SNRPB2   | -0.0369 | 0.9186 |
| 51020 | C05 | 56361 | 5931   | RBBP7    | -0.0369 | 0.9186 |
| 11024 | D11 | 8310  | 9053   | MAP7     | -0.0369 | 0.9186 |
| 51011 | H05 | 54781 | 140690 | CTCFL    | -0.0369 | 0.9186 |
| 11062 | C06 | 9964  | 24139  | EML2     | -0.0369 | 0.9186 |
| 11056 | H09 | 1138  | 202559 | KHDRBS2  | -0.0369 | 0.9186 |
| 31024 | E02 | 13323 | 6406   | SEMG1    | -0.0369 | 0.9186 |
| 11027 | E09 | 3125  | 4830   | NME1     | -0.0369 | 0.9186 |
| 11078 | E03 | 6889  | 8943   | AP3D1    | -0.0368 | 0.9187 |
| 51031 | D02 | 1022  | 1944   | EFNA3    | -0.0368 | 0.9187 |
| 51001 | H06 | 52579 | 64648  | SPANXD   | -0.0368 | 0.9187 |
| 11061 | F12 | 3041  | 7108   | TM7SF2   | -0.0367 | 0.9189 |
| 31012 | D07 | 12139 | 81889  | FAHD1    | -0.0367 | 0.9190 |
| 31043 | G06 | 6721  | 57693  | ZNF317   | -0.0367 | 0.9190 |
| 51027 | F11 | 53383 | 7748   | ZNF195   | -0.0367 | 0.9190 |
| 11039 | H06 | 5263  | 4605   | MYBL2    | -0.0367 | 0.9190 |
| 51030 | E01 | 55349 | 10113  | PREB     | -0.0367 | 0.9190 |
| 11075 | C01 | 858   | 10671  | DCTN6    | -0.0367 | 0.9190 |
| 11062 | E11 | 2648  | 36     | ACADSB   | -0.0367 | 0.9190 |
| 11058 | E11 | 9487  | 54978  | C2orf18  | -0.0367 | 0.9190 |
| 11028 | E12 | 7972  | 11020  | IFT27    | -0.0367 | 0.9191 |

|       |     |       |        |          |         |        |
|-------|-----|-------|--------|----------|---------|--------|
| 31020 | D04 | 13226 | 6128   | RPL6     | -0.0366 | 0.9191 |
| 31011 | C09 | 12264 | 6595   | SMARCA2  | -0.0366 | 0.9191 |
| 11078 | H04 | 7831  | 26152  | ZNF337   | -0.0366 | 0.9191 |
| 11080 | C01 | 4559  | 11004  | KIF2C    | -0.0366 | 0.9192 |
| 11007 | F05 | 8308  | 79370  | BCL2L14  | -0.0366 | 0.9192 |
| 51035 | H06 | 53820 | 337    | APOA4    | -0.0366 | 0.9192 |
| 11018 | H08 | 3271  | 51649  | MRPS23   | -0.0365 | 0.9193 |
| 11088 | C09 | 868   | 10505  | SEMA4F   | -0.0365 | 0.9194 |
| 11030 | C04 | 6965  | 55038  | CDCA4    | -0.0365 | 0.9194 |
| 11037 | E02 | 6219  | 55020  | TTC38    | -0.0365 | 0.9194 |
| 51014 | C09 | 52915 | 9480   | ONECUT2  | -0.0365 | 0.9194 |
| 11037 | A07 | 3430  | 8273   | SLC10A3  | -0.0365 | 0.9195 |
| 31021 | G02 | 12951 | 844    | CASQ1    | -0.0365 | 0.9195 |
| 51003 | D07 | 52768 | 339201 | C17orf65 | -0.0364 | 0.9195 |
| 11017 | A10 | 7840  | 150590 | C2orf15  | -0.0364 | 0.9195 |
| 11005 | D06 | 2864  | 55957  | LIN37    | -0.0364 | 0.9195 |
| 31032 | G06 | 14495 | 29761  | USP25    | -0.0364 | 0.9196 |
| 11085 | E07 | 3241  | 23787  | MTCH1    | -0.0364 | 0.9196 |
| 11012 | A10 | 5294  | 54471  | SMCR7L   | -0.0364 | 0.9197 |
| 51004 | D12 | 55085 | 51312  | SLC25A37 | -0.0364 | 0.9197 |
| 11038 | F10 | 5861  | 5518   | PPP2R1A  | -0.0363 | 0.9197 |
| 11071 | A09 | 7671  | 10859  | LILRB1   | -0.0363 | 0.9198 |
| 11001 | H02 | 8600  | 347735 | SERINC2  | -0.0363 | 0.9199 |
| 31010 | H09 | 11676 | 146802 | SLC47A2  | -0.0362 | 0.9199 |
| 31045 | B05 | 9583  | 55671  | SMEK1    | -0.0362 | 0.9199 |
| 31029 | B02 | 14357 | 54494  | C11orf71 | -0.0362 | 0.9200 |
| 51012 | G08 | 53023 | 57720  | GPR107   | -0.0362 | 0.9200 |
| 11073 | G06 | 8910  | 25977  | NECAP1   | -0.0362 | 0.9201 |
| 11077 | D07 | 1575  | 1047   | CLGN     | -0.0362 | 0.9201 |
| 31021 | G09 | 12854 | 26959  | HBP1     | -0.0361 | 0.9202 |
| 51002 | H10 | 52633 | 7832   | BTG2     | -0.0361 | 0.9203 |
| 11062 | D05 | 8475  | 33     | ACADL    | -0.0361 | 0.9203 |
| 51006 | C07 | 53717 | 53832  | IL20RA   | -0.0361 | 0.9203 |
| 11015 | E11 | 9137  | 64581  | CLEC7A   | -0.0360 | 0.9204 |
| 11083 | D12 | 7211  | 116071 | BATF2    | -0.0360 | 0.9204 |
| 11006 | E02 | 437   | 55143  | CDCA8    | -0.0360 | 0.9204 |
| 51013 | F03 | 52935 | 9960   | USP3     | -0.0360 | 0.9204 |
| 11059 | D03 | 1142  | 2697   | GJA1     | -0.0360 | 0.9204 |
| 51028 | G01 | 55586 | 56606  | SLC2A9   | -0.0360 | 0.9205 |
| 11001 | C01 | 465   | 8818   | DPM2     | -0.0360 | 0.9205 |
| 11086 | C12 | 9268  | 9907   | KIAA0415 | -0.0359 | 0.9206 |
| 11051 | B05 | 4161  | 27111  | SDCBP2   | -0.0359 | 0.9206 |
| 31021 | D10 | 13310 | 54600  | UGT1A9   | -0.0359 | 0.9206 |
| 51023 | C06 | 56065 | 6311   | ATXN2    | -0.0359 | 0.9207 |

|       |     |       |        |          |         |        |
|-------|-----|-------|--------|----------|---------|--------|
| 11043 | H06 | 435   | 29934  | SNX12    | -0.0359 | 0.9207 |
| 31042 | E09 | 5320  | 92292  | GLYATL1  | -0.0359 | 0.9208 |
| 11025 | D06 | 2177  | 11059  | WWP1     | -0.0358 | 0.9208 |
| 31011 | A10 | 12120 | 2941   | GSTA4    | -0.0358 | 0.9209 |
| 11022 | E11 | 7819  | 2027   | ENO3     | -0.0358 | 0.9209 |
| 11013 | E04 | 8314  | 313    | AOAH     | -0.0358 | 0.9210 |
| 51021 | B01 | 55831 | 56603  | CYP26B1  | -0.0358 | 0.9210 |
| 31041 | H04 | 5898  | 4170   | MCL1     | -0.0357 | 0.9211 |
| 51023 | D05 | 56211 | 22865  | SLITRK3  | -0.0357 | 0.9211 |
| 11059 | E12 | 9517  | 148523 | C1orf51  | -0.0357 | 0.9211 |
| 31029 | E12 | 14315 | 158809 | MAGEB6   | -0.0357 | 0.9212 |
| 51020 | C12 | 56039 | 162968 | ZNF497   | -0.0356 | 0.9212 |
| 31005 | C05 | 10848 | 5017   | OVOL1    | -0.0356 | 0.9212 |
| 11045 | F02 | 1044  | 3396   | ICT1     | -0.0356 | 0.9213 |
| 11059 | H03 | 9213  | 79699  | ZYG11B   | -0.0356 | 0.9213 |
| 31008 | F07 | 11596 | 283899 | INO80E   | -0.0356 | 0.9213 |
| 51011 | A12 | 52965 | 54790  | TET2     | -0.0356 | 0.9214 |
| 11060 | H09 | 8275  | 5939   | RBMS2    | -0.0356 | 0.9214 |
| 51004 | F02 | 53890 | 973    | CD79A    | -0.0356 | 0.9214 |
| 11084 | D10 | 6007  | 977    | CD151    | -0.0356 | 0.9214 |
| 31016 | F05 | 12519 | 23254  | KAZ      | -0.0355 | 0.9215 |
| 51014 | F01 | 52700 | 2561   | GABRB2   | -0.0355 | 0.9215 |
| 11071 | B04 | 7837  | 55720  | TSR1     | -0.0354 | 0.9216 |
| 51001 | D10 | 52598 | 160065 | PATE1    | -0.0354 | 0.9217 |
| 11085 | D04 | 9602  | 10336  | PCGF3    | -0.0354 | 0.9217 |
| 51025 | C01 | 56285 | 5493   | PPL      | -0.0354 | 0.9218 |
| 31037 | A11 | 14142 | 80023  | NRSN2    | -0.0354 | 0.9218 |
| 11080 | C03 | 3403  | 9100   | USP10    | -0.0354 | 0.9218 |
| 11017 | E09 | 7764  | 116372 | LYPD1    | -0.0354 | 0.9218 |
| 11021 | C04 | 5477  | 63036  | CELA2A   | -0.0353 | 0.9219 |
| 31019 | D08 | 13244 | 28299  | IGKV1-5  | -0.0353 | 0.9219 |
| 11080 | E03 | 8284  | 9033   | PKD2L1   | -0.0353 | 0.9219 |
| 11009 | H02 | 6543  | 8877   | SPHK1    | -0.0353 | 0.9220 |
| 11079 | B07 | 823   | 25896  | INTS7    | -0.0352 | 0.9220 |
| 11065 | C06 | 6002  | 10487  | CAP1     | -0.0352 | 0.9221 |
| 11037 | G07 | 8149  | 5360   | PLTP     | -0.0352 | 0.9221 |
| 11021 | B11 | 5203  | 3123   | HLA-DRB1 | -0.0351 | 0.9223 |
| 31039 | F05 | 1105  | 5877   | RABIF    | -0.0351 | 0.9223 |
| 11078 | H09 | 2378  | 9922   | IQSEC1   | -0.0351 | 0.9223 |
| 11042 | B04 | 1772  | 5375   | PMP2     | -0.0351 | 0.9224 |
| 11063 | F05 | 420   | 1191   | CLU      | -0.0351 | 0.9224 |
| 11026 | D04 | 4137  | 6844   | VAMP2    | -0.0351 | 0.9225 |
| 11036 | H04 | 3260  | 55603  | FAM46A   | -0.0351 | 0.9225 |
| 11019 | H04 | 3395  | 84265  | POLR3GL  | -0.0351 | 0.9225 |



|       |     |       |        |          |         |        |
|-------|-----|-------|--------|----------|---------|--------|
| 51033 | E10 | 54221 | 55338  | FLJ11292 | -0.0350 | 0.9225 |
| 11024 | G10 | 8201  | 6776   | STAT5A   | -0.0350 | 0.9225 |
| 11087 | G11 | 5346  | 3313   | HSPA9    | -0.0350 | 0.9225 |
| 11019 | B07 | 7659  | 1861   | TOR1A    | -0.0350 | 0.9225 |
| 11081 | A11 | 2302  | 128977 | C22orf39 | -0.0350 | 0.9225 |
| 31035 | G01 | 14991 | 64344  | HIF3A    | -0.0350 | 0.9226 |
| 11066 | F09 | 2596  | 6515   | SLC2A3   | -0.0350 | 0.9226 |
| 11070 | A08 | 9740  | 23481  | PES1     | -0.0350 | 0.9226 |
| 31025 | F03 | 13615 | 22881  | ANKRD6   | -0.0350 | 0.9226 |
| 51012 | B08 | 52989 | 10082  | GPC6     | -0.0350 | 0.9227 |
| 11059 | B12 | 9769  | 3598   | IL13RA2  | -0.0350 | 0.9227 |
| 11065 | A08 | 2549  | 79869  | CPSF7    | -0.0349 | 0.9227 |
| 11039 | C03 | 6982  | 8470   | SORBS2   | -0.0349 | 0.9228 |
| 51030 | G02 | 56457 | 10692  | RRH      | -0.0349 | 0.9228 |
| 11074 | G10 | 5735  | 84324  | SARNP    | -0.0349 | 0.9228 |
| 51018 | B05 | 56742 | 8125   | ANP32A   | -0.0349 | 0.9229 |
| 11003 | A01 | 8960  | 6256   | RXRA     | -0.0349 | 0.9229 |
| 11020 | D10 | 7115  | 56937  | PMEPA1   | -0.0348 | 0.9229 |
| 11070 | F05 | 9607  | 1997   | ELF1     | -0.0348 | 0.9230 |
| 11076 | H11 | 1639  | 79596  | RNF219   | -0.0348 | 0.9230 |
| 31039 | A06 | 317   | 25776  | CBY1     | -0.0348 | 0.9230 |
| 11017 | H04 | 7500  | 55284  | UBE2W    | -0.0348 | 0.9230 |
| 51022 | B03 | 56234 | 167838 | TXLNB    | -0.0347 | 0.9231 |
| 11082 | D02 | 9112  | 113444 | C1orf212 | -0.0347 | 0.9231 |
| 31019 | C08 | 12950 | 54851  | ANKRD49  | -0.0347 | 0.9232 |
| 51015 | E03 | 53036 | 1515   | CTSL2    | -0.0347 | 0.9232 |
| 11021 | D07 | 4005  | 10590  | SCGN     | -0.0347 | 0.9233 |
| 11005 | C03 | 1483  | 7180   | CRISP2   | -0.0347 | 0.9233 |
| 51031 | D06 | 53190 | 10357  | HMGB1L1  | -0.0347 | 0.9233 |
| 11087 | F03 | 269   | 5184   | PEPD     | -0.0346 | 0.9234 |
| 11073 | F08 | 4891  | 10525  | HYOU1    | -0.0346 | 0.9234 |
| 51030 | E07 | 55689 | 2213   | FCGR2B   | -0.0346 | 0.9234 |
| 11036 | C11 | 6741  | 2628   | GATM     | -0.0346 | 0.9234 |
| 11064 | H08 | 9926  | 5630   | PRPH     | -0.0346 | 0.9234 |
| 11046 | H06 | 7007  | 84900  | RNFT2    | -0.0346 | 0.9235 |
| 11030 | H05 | 3722  | 6118   | RPA2     | -0.0346 | 0.9235 |
| 11079 | F07 | 6246  | 478    | ATP1A3   | -0.0346 | 0.9235 |
| 11022 | B02 | 7814  | 8856   | NR1I2    | -0.0346 | 0.9235 |
| 11026 | G04 | 325   | 10923  | SUB1     | -0.0345 | 0.9235 |
| 31039 | C12 | 8076  | NA     | NA       | -0.0345 | 0.9236 |
| 31018 | E09 | 13113 | 84693  | MCEE     | -0.0345 | 0.9237 |
| 11019 | H09 | 7685  | 1365   | CLDN3    | -0.0344 | 0.9239 |
| 11017 | E07 | 6846  | 9349   | RPL23    | -0.0344 | 0.9239 |
| 11086 | H04 | 7177  | 60     | ACTB     | -0.0344 | 0.9240 |

|       |     |       |        |           |         |        |
|-------|-----|-------|--------|-----------|---------|--------|
| 31019 | F01 | 13132 | 55287  | TMEM40    | -0.0343 | 0.9240 |
| 31042 | E03 | 5539  | 9205   | ZMYM5     | -0.0343 | 0.9241 |
| 31044 | B02 | 4520  | 54442  | KCTD5     | -0.0343 | 0.9241 |
| 51010 | E08 | 54737 | 55184  | C20orf12  | -0.0342 | 0.9242 |
| 11032 | E02 | 10076 | 220202 | ATOH7     | -0.0342 | 0.9242 |
| 51020 | D02 | 55810 | 9196   | KCNAB3    | -0.0342 | 0.9242 |
| 31033 | D10 | 14942 | 84314  | TMEM107   | -0.0342 | 0.9242 |
| 11030 | F08 | 3989  | 10573  | MRPL28    | -0.0342 | 0.9243 |
| 11070 | G10 | 155   | 9238   | TBRG4     | -0.0342 | 0.9243 |
| 11029 | D06 | 4275  | 6137   | RPL13     | -0.0341 | 0.9244 |
| 11079 | H09 | 2397  | 10013  | HDAC6     | -0.0341 | 0.9245 |
| 51009 | D12 | 53934 | 6310   | ATXN1     | -0.0341 | 0.9245 |
| 11020 | B02 | 5341  | 79188  | TMEM43    | -0.0341 | 0.9246 |
| 31032 | A07 | 14473 | 23394  | ADNP      | -0.0341 | 0.9246 |
| 11006 | A09 | 7751  | 51778  | MYOZ2     | -0.0340 | 0.9246 |
| 11032 | B07 | 6654  | 11162  | NUDT6     | -0.0340 | 0.9246 |
| 11070 | H10 | 7866  | 114327 | EFHC1     | -0.0340 | 0.9246 |
| 11037 | D06 | 4746  | 80746  | TSEN2     | -0.0340 | 0.9247 |
| 51022 | A11 | 55732 | 4745   | NELL1     | -0.0340 | 0.9247 |
| 11085 | D11 | 8319  | 2701   | GJA4      | -0.0340 | 0.9247 |
| 11087 | G04 | 7098  | 9812   | KIAA0141  | -0.0340 | 0.9247 |
| 11086 | H07 | 6271  | 147339 | C18orf25  | -0.0340 | 0.9248 |
| 31028 | G01 | 14743 | 23532  | PRAME     | -0.0339 | 0.9248 |
| 51023 | F08 | 56240 | 9037   | SEMA5A    | -0.0339 | 0.9248 |
| 11022 | E12 | 7146  | 64093  | SMOC1     | -0.0339 | 0.9249 |
| 11049 | A11 | 1141  | 22884  | WDR37     | -0.0339 | 0.9249 |
| 11003 | A07 | 5851  | 84152  | PPP1R1B   | -0.0339 | 0.9249 |
| 11081 | E09 | 8204  | 554202 | LOC554202 | -0.0339 | 0.9250 |
| 31042 | C10 | 5788  | 84295  | PHF6      | -0.0339 | 0.9250 |
| 11041 | H03 | 4120  | 4700   | NDUFA6    | -0.0339 | 0.9250 |
| 11001 | G10 | 8815  | 9208   | LRRFIP1   | -0.0339 | 0.9250 |
| 11088 | D11 | 1046  | 23256  | SCFD1     | -0.0339 | 0.9250 |
| 51029 | H03 | 55343 | 80167  | C4orf29   | -0.0338 | 0.9250 |
| 11036 | C10 | 3700  | 8533   | COPS3     | -0.0338 | 0.9250 |
| 51005 | D01 | 54359 | 4114   | MAGEB3    | -0.0338 | 0.9251 |
| 11052 | C04 | 3404  | 9528   | TMEM59    | -0.0338 | 0.9251 |
| 31017 | A09 | 13049 | 153339 | TMEM167A  | -0.0338 | 0.9251 |
| 51012 | H11 | 52995 | 10575  | CCT4      | -0.0338 | 0.9251 |
| 31027 | E02 | 13963 | 474    | ATOH1     | -0.0338 | 0.9251 |
| 31029 | C04 | 14217 | 5077   | PAX3      | -0.0338 | 0.9252 |
| 51026 | C10 | 56307 | 147138 | TMC8      | -0.0338 | 0.9252 |
| 51034 | D09 | 54249 | 55195  | C14orf105 | -0.0338 | 0.9252 |
| 11035 | D12 | 3462  | 66005  | CHID1     | -0.0337 | 0.9253 |
| 11066 | B07 | 1957  | 56658  | TRIM39    | -0.0337 | 0.9253 |

|       |     |       |        |           |         |        |
|-------|-----|-------|--------|-----------|---------|--------|
| 11075 | B07 | 1763  | 130814 | PQLC3     | -0.0337 | 0.9253 |
| 51035 | B11 | 55126 | 80108  | ZFP2      | -0.0337 | 0.9253 |
| 11025 | E03 | 7918  | 4436   | MSH2      | -0.0337 | 0.9254 |
| 51021 | C10 | 55915 | 3741   | KCNA5     | -0.0337 | 0.9254 |
| 51016 | C12 | 56816 | 83956  | RACGAP1P  | -0.0337 | 0.9254 |
| 31021 | G06 | 13297 | 27329  | ANGPTL3   | -0.0337 | 0.9254 |
| 31044 | G11 | 2758  | 79022  | TMEM106C  | -0.0337 | 0.9254 |
| 51014 | H01 | 54965 | 386617 | KCTD8     | -0.0336 | 0.9254 |
| 51002 | H05 | 52618 | 146378 | C16orf92  | -0.0336 | 0.9254 |
| 51005 | A12 | 54484 | 11151  | CORO1A    | -0.0336 | 0.9255 |
| 11015 | C03 | 5703  | 4496   | MT1H      | -0.0336 | 0.9255 |
| 11075 | H05 | 1548  | 85479  | DNAJC5B   | -0.0336 | 0.9256 |
| 11008 | E07 | 5527  | 1634   | DCN       | -0.0336 | 0.9256 |
| 11028 | D12 | 818   | 7163   | TPD52     | -0.0336 | 0.9256 |
| 31042 | F08 | 6851  | 92856  | IMP4      | -0.0336 | 0.9256 |
| 31042 | F03 | 6531  | 22932  | POMZP3    | -0.0336 | 0.9256 |
| 51016 | H06 | 56728 | 729862 | LOC729862 | -0.0335 | 0.9257 |
| 51031 | E01 | 55489 | 51257  | MARCH2    | -0.0335 | 0.9257 |
| 11015 | H09 | 5195  | 56927  | GPR108    | -0.0335 | 0.9257 |
| 11025 | G04 | 4442  | 4134   | MAP4      | -0.0335 | 0.9257 |
| 11075 | E01 | 4378  | 23413  | NCS1      | -0.0335 | 0.9257 |
| 31045 | G09 | 6106  | 8563   | THOC5     | -0.0335 | 0.9258 |
| 11047 | F10 | 170   | 283643 | C14orf80  | -0.0335 | 0.9259 |
| 11047 | H11 | 5615  | 725    | C4BPB     | -0.0335 | 0.9259 |
| 11077 | E06 | 1725  | 57696  | DDX55     | -0.0334 | 0.9259 |
| 51013 | E03 | 54330 | 8875   | VNN2      | -0.0334 | 0.9259 |
| 11062 | H10 | 8368  | 83539  | CHST9     | -0.0334 | 0.9260 |
| 11009 | B12 | 566   | 79714  | CCDC51    | -0.0334 | 0.9260 |
| 11044 | E11 | 4351  | 4833   | NME4      | -0.0334 | 0.9260 |
| 11055 | A04 | 4490  | 23584  | VSIG2     | -0.0334 | 0.9260 |
| 11052 | F10 | 832   | 54977  | SLC25A38  | -0.0333 | 0.9262 |
| 51033 | C11 | 54419 | 129852 | C2orf73   | -0.0333 | 0.9262 |
| 11070 | A05 | 1430  | 5584   | PRKCI     | -0.0333 | 0.9262 |
| 51031 | B09 | 55410 | 353324 | SPATA12   | -0.0332 | 0.9263 |
| 31008 | C07 | 11766 | 6919   | TCEA2     | -0.0332 | 0.9265 |
| 51020 | D05 | 56386 | 80975  | TMPRSS5   | -0.0331 | 0.9265 |
| 11056 | G06 | 9751  | 5606   | MAP2K3    | -0.0331 | 0.9265 |
| 11066 | G07 | 10085 | 10346  | TRIM22    | -0.0331 | 0.9266 |
| 31028 | H05 | 14115 | 11035  | RIPK3     | -0.0331 | 0.9266 |
| 31045 | E03 | 5954  | 8884   | SLC5A6    | -0.0331 | 0.9266 |
| 11016 | G04 | 6285  | 1081   | CGA       | -0.0331 | 0.9266 |
| 11055 | G07 | 464   | 117143 | TADA1     | -0.0331 | 0.9267 |
| 11054 | G06 | 536   | 64782  | AEN       | -0.0330 | 0.9267 |
| 51033 | G08 | 54166 | 80215  | C21orf96  | -0.0330 | 0.9269 |

|       |     |       |           |          |         |        |
|-------|-----|-------|-----------|----------|---------|--------|
| 11058 | C04 | 7173  | 114987    | WDR31    | -0.0330 | 0.9269 |
| 51030 | A02 | 56368 | 55289     | ACOXL    | -0.0330 | 0.9269 |
| 51028 | E11 | 55378 | 80127     | C14orf45 | -0.0329 | 0.9270 |
| 51031 | G08 | 55556 | 389073    | C2orf80  | -0.0329 | 0.9270 |
| 11037 | A03 | 3736  | 65220     | NADK     | -0.0329 | 0.9270 |
| 11029 | G07 | 6765  | 27243     | CHMP2A   | -0.0329 | 0.9270 |
| 11028 | D10 | 3485  | 10772     | SRSF10   | -0.0329 | 0.9270 |
| 11073 | D09 | 4643  | 55111     | PLEKHJ1  | -0.0329 | 0.9270 |
| 51026 | B01 | 56920 | 83394     | PITPNM3  | -0.0329 | 0.9270 |
| 51030 | F07 | 55635 | 5464      | PPA1     | -0.0329 | 0.9271 |
| 11064 | C03 | 2876  | 113451    | ADC      | -0.0328 | 0.9272 |
| 11046 | B09 | 4153  | 1442      | CSH1     | -0.0328 | 0.9272 |
| 11028 | H04 | 6727  | 203       | AK1      | -0.0328 | 0.9273 |
| 51003 | A02 | 52675 | 100129396 | FAM106C  | -0.0328 | 0.9274 |
| 51033 | E02 | 55478 | 29064     | FAM30A   | -0.0327 | 0.9274 |
| 51023 | E07 | 56263 | 57575     | PCDH10   | -0.0327 | 0.9274 |
| 11049 | E09 | 177   | 7884      | SLBP     | -0.0327 | 0.9274 |
| 31039 | H01 | 3239  | 51222     | ZNF219   | -0.0327 | 0.9274 |
| 31037 | A08 | 15054 | 54556     | ING3     | -0.0327 | 0.9274 |
| 11007 | D09 | 7959  | 4792      | NFKBIA   | -0.0327 | 0.9274 |
| 31040 | H08 | 8291  | 10637     | LEFTY1   | -0.0327 | 0.9274 |
| 11015 | C09 | 6316  | 9553      | MRPL33   | -0.0327 | 0.9275 |
| 11076 | E02 | 4070  | 22848     | AAK1     | -0.0327 | 0.9276 |
| 11049 | E07 | 4151  | 23093     | TTLL5    | -0.0326 | 0.9276 |
| 51003 | H11 | 53340 | 11172     | INSL6    | -0.0326 | 0.9277 |
| 31038 | G02 | 14711 | 10280     | SIGMAR1  | -0.0326 | 0.9277 |
| 11078 | D01 | 1471  | 2515      | ADAM2    | -0.0326 | 0.9278 |
| 11051 | H04 | 5873  | 983       | CDK1     | -0.0326 | 0.9278 |
| 11041 | G01 | 8861  | 84950     | PRPF38A  | -0.0325 | 0.9278 |
| 51004 | F01 | 52640 | 6016      | RIT1     | -0.0325 | 0.9278 |
| 31028 | B09 | 14109 | 80315     | CPEB4    | -0.0325 | 0.9278 |
| 31005 | C03 | 10813 | 23034     | SAMD4A   | -0.0325 | 0.9279 |
| 11044 | D12 | 39    | 5908      | RAP1B    | -0.0325 | 0.9279 |
| 11015 | G02 | 8844  | 79048     | SECISBP2 | -0.0324 | 0.9280 |
| 51030 | H07 | 56501 | 1046      | CDX4     | -0.0324 | 0.9281 |
| 11022 | E07 | 7337  | 115677    | NOSTRIN  | -0.0324 | 0.9281 |
| 51022 | F02 | 56644 | 6925      | TCF4     | -0.0324 | 0.9281 |
| 11003 | G01 | 116   | 116442    | RAB39B   | -0.0324 | 0.9281 |
| 51008 | F05 | 54145 | 10117     | ENAM     | -0.0324 | 0.9282 |
| 11012 | H03 | 3176  | 26502     | NARF     | -0.0324 | 0.9282 |
| 51022 | G10 | 56423 | 7415      | VCP      | -0.0324 | 0.9282 |
| 31021 | C09 | 13135 | 5356      | PLRG1    | -0.0324 | 0.9282 |
| 11009 | G01 | 3886  | 10397     | NDRG1    | -0.0324 | 0.9282 |
| 11002 | D05 | 9780  | 83856     | FSD1L    | -0.0324 | 0.9282 |

|       |     |       |        |          |         |        |
|-------|-----|-------|--------|----------|---------|--------|
| 11021 | C08 | 7946  | 25864  | ABHD14A  | -0.0323 | 0.9282 |
| 51031 | H10 | 56488 | 147744 | TMEM190  | -0.0323 | 0.9283 |
| 31016 | F04 | 12551 | 81472  | OR2C3    | -0.0323 | 0.9283 |
| 51009 | A09 | 54915 | 374864 | C18orf34 | -0.0323 | 0.9283 |
| 11001 | D05 | 738   | 6227   | RPS21    | -0.0323 | 0.9283 |
| 11019 | H06 | 7912  | 83698  | CALN1    | -0.0323 | 0.9283 |
| 31017 | F11 | 12955 | 6540   | SLC6A13  | -0.0323 | 0.9283 |
| 11066 | G02 | 7738  | 3493   | IGHA1    | -0.0322 | 0.9285 |
| 11024 | G09 | 4782  | 10291  | SF3A1    | -0.0322 | 0.9285 |
| 11048 | A05 | 8707  | 54932  | EXD3     | -0.0322 | 0.9285 |
| 11009 | D04 | 800   | 140564 | APOBEC3D | -0.0322 | 0.9285 |
| 31005 | A05 | 10992 | 6189   | RPS3A    | -0.0322 | 0.9285 |
| 11062 | E07 | 6526  | 80174  | DBF4B    | -0.0322 | 0.9285 |
| 11037 | A01 | 9598  | 8227   | SFRS17A  | -0.0322 | 0.9286 |
| 51020 | D04 | 56141 | 3881   | KRT31    | -0.0322 | 0.9286 |
| 11020 | B06 | 7710  | 51727  | CMPK1    | -0.0322 | 0.9286 |
| 11087 | A07 | 3322  | 9253   | NUMBL    | -0.0321 | 0.9287 |
| 11028 | H02 | 7442  | 387    | RHOA     | -0.0321 | 0.9288 |
| 31020 | A07 | 12978 | 55600  | ITLN1    | -0.0321 | 0.9288 |
| 11061 | E01 | 2164  | 79691  | QTRTD1   | -0.0321 | 0.9288 |
| 51005 | C12 | 53770 | 2740   | GLP1R    | -0.0321 | 0.9288 |
| 31042 | B02 | 4896  | 930    | CD19     | -0.0321 | 0.9288 |
| 51006 | E12 | 55011 | 54700  | RRN3     | -0.0321 | 0.9289 |
| 31040 | A09 | 10134 | 1      | A1BG     | -0.0320 | 0.9289 |
| 51034 | F01 | 54438 | 353324 | SPATA12  | -0.0320 | 0.9289 |
| 31001 | D10 | 10783 | 762    | CA4      | -0.0320 | 0.9290 |
| 11083 | H11 | 6881  | 55272  | IMP3     | -0.0320 | 0.9290 |
| 31039 | G03 | 6523  | 4171   | MCM2     | -0.0320 | 0.9290 |
| 11043 | D06 | 8456  | 255101 | CCDC108  | -0.0320 | 0.9290 |
| 11078 | F09 | 3030  | 9921   | RNF10    | -0.0320 | 0.9290 |
| 31024 | E11 | 13669 | 6907   | TBL1X    | -0.0320 | 0.9291 |
| 31032 | F02 | 14607 | 92     | ACVR2A   | -0.0320 | 0.9291 |
| 31030 | C12 | 14322 | 133584 | EGFLAM   | -0.0319 | 0.9291 |
| 11070 | F08 | 7024  | 3507   | IGHM     | -0.0319 | 0.9292 |
| 11077 | G08 | 805   | 8310   | ACOX3    | -0.0319 | 0.9292 |
| 51012 | F01 | 54029 | 91975  | ZNF300   | -0.0319 | 0.9292 |
| 11035 | G06 | 8240  | 56673  | C11orf16 | -0.0318 | 0.9293 |
| 11074 | H07 | 5029  | 51552  | RAB14    | -0.0318 | 0.9294 |
| 11083 | H07 | 690   | 5552   | SRGN     | -0.0318 | 0.9294 |
| 31012 | B09 | 12240 | 1192   | CLIC1    | -0.0318 | 0.9295 |
| 51002 | C08 | 52957 | 518    | ATP5G3   | -0.0317 | 0.9295 |
| 11071 | F12 | 8429  | 273    | AMPH     | -0.0317 | 0.9295 |
| 51010 | C09 | 54791 | 4353   | MPO      | -0.0317 | 0.9296 |
| 11003 | A03 | 9760  | 84904  | C9orf100 | -0.0317 | 0.9297 |

|       |     |       |        |         |         |        |
|-------|-----|-------|--------|---------|---------|--------|
| 51022 | F04 | 56649 | 57649  | PHF12   | -0.0317 | 0.9297 |
| 11078 | D03 | 7658  | 22796  | COG2    | -0.0316 | 0.9297 |
| 11062 | D08 | 1993  | 205428 | C3orf58 | -0.0316 | 0.9297 |
| 31045 | H06 | 9640  | 166979 | CDC20B  | -0.0316 | 0.9297 |
| 31040 | B06 | 10028 | 57129  | MRPL47  | -0.0316 | 0.9297 |
| 51012 | D03 | 54876 | 732    | C8B     | -0.0316 | 0.9297 |
| 11036 | E11 | 4679  | 2806   | GOT2    | -0.0316 | 0.9299 |
| 11015 | C05 | 6202  | 81605  | URM1    | -0.0316 | 0.9299 |
| 11061 | F02 | 2887  | 10113  | PREB    | -0.0315 | 0.9300 |
| 11045 | C02 | 8625  | 55291  | PPP6R3  | -0.0315 | 0.9300 |
| 31007 | B05 | 10889 | 571    | BACH1   | -0.0315 | 0.9300 |
| 11012 | H02 | 5869  | 216    | ALDH1A1 | -0.0315 | 0.9300 |
| 31031 | B09 | 14640 | 2701   | GJA4    | -0.0315 | 0.9301 |
| 11045 | F08 | 1820  | 4255   | MGMT    | -0.0315 | 0.9301 |
| 31041 | A06 | 5424  | 640    | BLK     | -0.0315 | 0.9301 |
| 11073 | G11 | 2020  | 26095  | PTPN20B | -0.0314 | 0.9302 |
| 11039 | F11 | 1422  | 55713  | ZNF334  | -0.0314 | 0.9302 |
| 11045 | G10 | 9061  | 50804  | MYEF2   | -0.0314 | 0.9302 |
| 11076 | B12 | 316   | 55619  | DOCK10  | -0.0314 | 0.9302 |
| 51023 | B09 | 56213 | 23530  | NNT     | -0.0314 | 0.9302 |
| 31028 | G05 | 14151 | 2803   | GOLGA4  | -0.0314 | 0.9302 |
| 51002 | F08 | 56313 | 284612 | SYPL2   | -0.0314 | 0.9302 |
| 31026 | E02 | 14023 | 4004   | LMO1    | -0.0314 | 0.9303 |
| 31027 | C07 | 13919 | 57459  | GATAD2B | -0.0314 | 0.9303 |
| 31003 | C08 | 10676 | 54514  | DDX4    | -0.0313 | 0.9304 |
| 51030 | A12 | 56531 | 79368  | FCRL2   | -0.0313 | 0.9304 |
| 11051 | C10 | 916   | 3183   | HNRNPC  | -0.0313 | 0.9304 |
| 11072 | B12 | 3767  | 5451   | POU2F1  | -0.0313 | 0.9304 |
| 51010 | B10 | 52671 | 23314  | SATB2   | -0.0313 | 0.9305 |
| 51023 | A02 | 56681 | 64762  | FAM59A  | -0.0313 | 0.9305 |
| 11009 | G04 | 8993  | 2778   | GNAS    | -0.0312 | 0.9307 |
| 11050 | H01 | 3092  | 64081  | PBLD    | -0.0312 | 0.9307 |
| 31034 | E08 | 14864 | 9589   | WTAP    | -0.0312 | 0.9308 |
| 11032 | F05 | 6794  | 5031   | P2RY6   | -0.0312 | 0.9308 |
| 51020 | A03 | 56769 | 3240   | HP      | -0.0311 | 0.9308 |
| 11087 | B04 | 1842  | 51605  | TRMT6   | -0.0311 | 0.9309 |
| 11003 | H02 | 2411  | 79921  | TCEAL4  | -0.0311 | 0.9309 |
| 31027 | D03 | 13947 | 8111   | GPR68   | -0.0311 | 0.9309 |
| 11067 | D08 | 8265  | 57674  | RNF213  | -0.0311 | 0.9309 |
| 11028 | A12 | 3396  | 4832   | NME3    | -0.0310 | 0.9310 |
| 51008 | G10 | 55155 | 727    | C5      | -0.0310 | 0.9310 |
| 11001 | B11 | 8577  | 23209  | MLC1    | -0.0310 | 0.9310 |
| 51013 | C12 | 53018 | 5143   | PDE4C   | -0.0310 | 0.9311 |
| 11017 | E02 | 9046  | 51765  | MST4    | -0.0310 | 0.9312 |

|       |     |       |        |           |         |        |
|-------|-----|-------|--------|-----------|---------|--------|
| 11009 | F06 | 3711  | 587    | BCAT2     | -0.0310 | 0.9312 |
| 11028 | G01 | 5755  | 5730   | PTGDS     | -0.0309 | 0.9312 |
| 31001 | F03 | 10655 | 10518  | CIB2      | -0.0309 | 0.9313 |
| 11041 | H02 | 5987  | 4809   | NHP2L1    | -0.0309 | 0.9313 |
| 11048 | F12 | 1835  | 3029   | HAGH      | -0.0309 | 0.9313 |
| 51004 | H09 | 54327 | 64839  | FBXL17    | -0.0309 | 0.9314 |
| 11019 | A11 | 4109  | 10239  | AP3S2     | -0.0309 | 0.9314 |
| 11022 | F02 | 7869  | 2342   | FNTB      | -0.0308 | 0.9315 |
| 11029 | B07 | 8184  | 10588  | MTHFS     | -0.0308 | 0.9316 |
| 11046 | E04 | 2095  | 9098   | USP6      | -0.0307 | 0.9317 |
| 11012 | F01 | 6119  | 51684  | SUFU      | -0.0307 | 0.9317 |
| 11063 | C01 | 9277  | 162517 | FBXO39    | -0.0307 | 0.9317 |
| 51018 | A01 | 56747 | 2251   | FGF6      | -0.0307 | 0.9318 |
| 31041 | C04 | 7262  | 51172  | NAGPA     | -0.0307 | 0.9318 |
| 51011 | C09 | 54121 | 3818   | KLKB1     | -0.0307 | 0.9319 |
| 11026 | C03 | 3489  | 2280   | FKBP1A    | -0.0306 | 0.9319 |
| 11006 | E11 | 6457  | 553115 | PEF1      | -0.0306 | 0.9319 |
| 31010 | D01 | 11533 | 26033  | ATRNL1    | -0.0306 | 0.9319 |
| 11059 | E08 | 7025  | 9512   | PMPCB     | -0.0306 | 0.9320 |
| 51029 | C09 | 55485 | 2188   | FANCF     | -0.0306 | 0.9321 |
| 31044 | C08 | 9983  | 197258 | FUK       | -0.0305 | 0.9321 |
| 11001 | E03 | 8811  | 4215   | MAP3K3    | -0.0305 | 0.9321 |
| 11080 | E05 | 1460  | 23556  | PIGN      | -0.0305 | 0.9322 |
| 51026 | H06 | 56823 | 338440 | ANO9      | -0.0305 | 0.9323 |
| 11030 | F03 | 7368  | 60492  | CCDC90B   | -0.0304 | 0.9324 |
| 11002 | F10 | 9579  | 10842  | C7orf16   | -0.0304 | 0.9325 |
| 51024 | C04 | 53576 | 26047  | CNTNAP2   | -0.0304 | 0.9325 |
| 11060 | G08 | 8402  | 5276   | SERPINI2  | -0.0303 | 0.9325 |
| 11082 | E04 | 9729  | 97     | ACYP1     | -0.0303 | 0.9325 |
| 51020 | C03 | 56792 | 54916  | C14orf101 | -0.0303 | 0.9325 |
| 31017 | H05 | 13096 | 2191   | FAP       | -0.0303 | 0.9325 |
| 11082 | C09 | 5047  | 84798  | C19orf48  | -0.0303 | 0.9326 |
| 11068 | B07 | 4146  | 7469   | WHSC2     | -0.0303 | 0.9327 |
| 11057 | D04 | 8819  | 54801  | HAUS6     | -0.0303 | 0.9327 |
| 11001 | G06 | 407   | 140576 | S100A16   | -0.0302 | 0.9327 |
| 11026 | B09 | 3528  | 6612   | SUMO3     | -0.0302 | 0.9327 |
| 31004 | D01 | 10373 | 11244  | ZHX1      | -0.0302 | 0.9328 |
| 31016 | G02 | 12810 | 10007  | GNPDA1    | -0.0302 | 0.9328 |
| 11039 | F09 | 7663  | 79132  | DHX58     | -0.0302 | 0.9328 |
| 11005 | H03 | 7979  | 65999  | LRRC61    | -0.0302 | 0.9329 |
| 11071 | A12 | 6218  | 85021  | REPS1     | -0.0302 | 0.9329 |
| 11056 | G10 | 8967  | 11117  | EMILIN1   | -0.0302 | 0.9329 |
| 11004 | D03 | 8616  | 10861  | SLC26A1   | -0.0302 | 0.9329 |
| 51026 | H09 | 55255 | 4253   | CTAGE5    | -0.0302 | 0.9329 |

|       |     |       |        |           |         |        |
|-------|-----|-------|--------|-----------|---------|--------|
| 11048 | D10 | 642   | 130617 | ZFAND2B   | -0.0302 | 0.9329 |
| 11060 | C07 | 8177  | 79753  | SNIP1     | -0.0302 | 0.9329 |
| 11028 | C10 | 3087  | 857    | CAV1      | -0.0302 | 0.9329 |
| 11013 | E12 | 3997  | 23649  | POLA2     | -0.0302 | 0.9329 |
| 31002 | A06 | 10287 | 162963 | ZNF610    | -0.0301 | 0.9329 |
| 51021 | B02 | 56628 | 338692 | ANKRD13D  | -0.0301 | 0.9330 |
| 31037 | E11 | 14393 | 112703 | FAM71E1   | -0.0301 | 0.9330 |
| 11016 | A05 | 4041  | 3159   | HMGAI     | -0.0301 | 0.9330 |
| 11082 | B09 | 2811  | 30833  | NT5C      | -0.0301 | 0.9331 |
| 11039 | D02 | 5846  | 10782  | ZNF274    | -0.0301 | 0.9331 |
| 31022 | F07 | 13360 | 158062 | LCN6      | -0.0301 | 0.9331 |
| 11089 | A03 | 972   | 84628  | NTNG2     | -0.0300 | 0.9332 |
| 11009 | B07 | 2809  | 91937  | TIMD4     | -0.0300 | 0.9332 |
| 11070 | D03 | 9477  | 8945   | BTRC      | -0.0300 | 0.9333 |
| 51003 | A10 | 52588 | 342510 | CD300E    | -0.0300 | 0.9333 |
| 11088 | A03 | 8453  | 5214   | PFKP      | -0.0300 | 0.9333 |
| 11084 | B07 | 4994  | 3537   | IGLC1     | -0.0299 | 0.9334 |
| 11030 | A02 | 7485  | 11051  | NUDT21    | -0.0299 | 0.9335 |
| 31013 | D12 | 12179 | 8448   | DOC2A     | -0.0299 | 0.9335 |
| 31031 | G02 | 14610 | 8331   | HIST1H2AJ | -0.0299 | 0.9335 |
| 51032 | C07 | 56831 | 6884   | TAF13     | -0.0299 | 0.9335 |
| 11063 | D05 | 5157  | 3992   | FADS1     | -0.0298 | 0.9336 |
| 11058 | A01 | 1965  | 90594  | ZNF439    | -0.0298 | 0.9336 |
| 31042 | G08 | 6392  | 4869   | NPM1      | -0.0298 | 0.9336 |
| 11032 | G09 | 6057  | 221150 | SKA3      | -0.0298 | 0.9336 |
| 51021 | D10 | 56670 | 55288  | RHOT1     | -0.0298 | 0.9337 |
| 31014 | E02 | 11886 | 4205   | MEF2A     | -0.0298 | 0.9337 |
| 11004 | E04 | 9256  | 148581 | UBE2U     | -0.0298 | 0.9337 |
| 11040 | F04 | 5689  | 6279   | S100A8    | -0.0298 | 0.9337 |
| 51001 | H09 | 54855 | 353141 | LCE2D     | -0.0298 | 0.9337 |
| 11015 | D12 | 7403  | 389336 | C5orf46   | -0.0298 | 0.9337 |
| 11036 | F11 | 2233  | 23157  | SEPT6     | -0.0298 | 0.9337 |
| 11069 | A11 | 6888  | 56926  | NCLN      | -0.0298 | 0.9338 |
| 11003 | D07 | 10236 | 91445  | RNF185    | -0.0298 | 0.9338 |
| 31023 | H11 | 13755 | 145864 | HAPLN3    | -0.0297 | 0.9339 |
| 51029 | A02 | 55636 | 2101   | ESRRA     | -0.0297 | 0.9339 |
| 31002 | C08 | 10340 | 56605  | ERO1LB    | -0.0297 | 0.9339 |
| 11073 | A07 | 4441  | 332    | BIRC5     | -0.0297 | 0.9339 |
| 31007 | E02 | 10915 | 115584 | SLC5A11   | -0.0297 | 0.9339 |
| 11048 | F01 | 8824  | 80028  | FBXL18    | -0.0297 | 0.9339 |
| 11042 | H08 | 5580  | 9976   | CLEC2B    | -0.0297 | 0.9339 |
| 31036 | E05 | 11638 | 84079  | ANKRD27   | -0.0297 | 0.9340 |
| 31002 | D08 | 10492 | 2114   | ETS2      | -0.0296 | 0.9340 |
| 31027 | C02 | 13990 | 9970   | NR1I3     | -0.0296 | 0.9341 |



|       |     |       |        |          |         |        |
|-------|-----|-------|--------|----------|---------|--------|
| 51023 | A06 | 55890 | 206338 | AQPEP    | -0.0296 | 0.9341 |
| 51016 | G02 | 53903 | 441518 | FAM127C  | -0.0296 | 0.9341 |
| 51003 | H07 | 52595 | 199990 | C1orf86  | -0.0296 | 0.9342 |
| 11020 | E04 | 7829  | 8542   | APOL1    | -0.0296 | 0.9342 |
| 11049 | E04 | 1151  | 4345   | CD200    | -0.0295 | 0.9343 |
| 11068 | C08 | 8251  | 10742  | RAI2     | -0.0295 | 0.9343 |
| 11036 | B09 | 6843  | 2224   | FDPS     | -0.0295 | 0.9343 |
| 51020 | E11 | 55826 | 1548   | CYP2A6   | -0.0295 | 0.9344 |
| 11070 | D05 | 9920  | 6668   | SP2      | -0.0295 | 0.9344 |
| 51025 | C02 | 55313 | 25930  | PTPN23   | -0.0294 | 0.9344 |
| 51024 | C02 | 55189 | 1729   | DIAPH1   | -0.0294 | 0.9345 |
| 11084 | A03 | 661   | 5899   | RALB     | -0.0294 | 0.9345 |
| 11074 | F10 | 5339  | 64077  | LHPP     | -0.0294 | 0.9346 |
| 11085 | E10 | 7925  | 10980  | COPS6    | -0.0294 | 0.9346 |
| 31030 | G01 | 14316 | 55930  | MYO5C    | -0.0293 | 0.9347 |
| 51006 | F02 | 56824 | 4135   | MAP6     | -0.0293 | 0.9347 |
| 11045 | A06 | 384   | 118426 | LOH12CR1 | -0.0293 | 0.9347 |
| 11052 | C10 | 327   | 51070  | NOSIP    | -0.0293 | 0.9348 |
| 11064 | C01 | 7707  | 768    | CA9      | -0.0293 | 0.9348 |
| 31022 | B09 | 13687 | 145553 | MDP1     | -0.0293 | 0.9348 |
| 31032 | B02 | 14515 | 83932  | C1orf124 | -0.0293 | 0.9348 |
| 51006 | H01 | 53701 | 94233  | OPN4     | -0.0293 | 0.9348 |
| 11074 | C03 | 1753  | 121355 | GTSF1    | -0.0293 | 0.9349 |
| 31042 | D08 | 5560  | 830    | CAPZA2   | -0.0293 | 0.9349 |
| 11012 | E10 | 4072  | 54555  | DDX49    | -0.0293 | 0.9349 |
| 11025 | E12 | 2060  | 29940  | DSE      | -0.0292 | 0.9349 |
| 11053 | E02 | 7476  | 57019  | CIAPIN1  | -0.0292 | 0.9349 |
| 31034 | F04 | 14895 | 10878  | CFHR3    | -0.0292 | 0.9349 |
| 11054 | E07 | 3065  | 1645   | AKR1C1   | -0.0292 | 0.9350 |
| 11001 | F10 | 9797  | 132299 | OCIAD2   | -0.0292 | 0.9350 |
| 11021 | H11 | 7641  | 4735   | SEPT2    | -0.0291 | 0.9351 |
| 11017 | F04 | 6433  | 6728   | SRP19    | -0.0291 | 0.9353 |
| 31024 | G02 | 13766 | 3500   | IGHG1    | -0.0290 | 0.9353 |
| 51021 | A02 | 56595 | 51148  | CERCAM   | -0.0290 | 0.9353 |
| 11013 | E08 | 7635  | 3959   | LGALS3BP | -0.0290 | 0.9353 |
| 11014 | F06 | 7610  | 7088   | TLE1     | -0.0290 | 0.9353 |
| 11057 | D10 | 5882  | 968    | CD68     | -0.0290 | 0.9354 |
| 31033 | E08 | 14905 | 7681   | MKRN3    | -0.0290 | 0.9354 |
| 51026 | F09 | 53186 | 3320   | HSP90AA1 | -0.0290 | 0.9354 |
| 31018 | C01 | 13097 | 130827 | TMEM182  | -0.0290 | 0.9354 |
| 31030 | E05 | 14364 | 414060 | TBC1D3C  | -0.0290 | 0.9354 |
| 11013 | H05 | 6785  | 56931  | DUS3L    | -0.0290 | 0.9355 |
| 11081 | D10 | 9096  | 5827   | PXMP2    | -0.0290 | 0.9355 |
| 11032 | C08 | 9181  | 1620   | DBC1     | -0.0289 | 0.9355 |

|       |     |       |        |           |         |        |
|-------|-----|-------|--------|-----------|---------|--------|
| 11015 | H06 | 9054  | 54556  | ING3      | -0.0289 | 0.9355 |
| 51004 | D01 | 52653 | 283129 | C11orf85  | -0.0289 | 0.9356 |
| 11003 | G03 | 446   | 9166   | EBAG9     | -0.0289 | 0.9356 |
| 11049 | E10 | 5610  | 29079  | MED4      | -0.0289 | 0.9356 |
| 11034 | B08 | 6180  | 2702   | GJA5      | -0.0289 | 0.9356 |
| 51028 | H09 | 56827 | 8687   | KRT38     | -0.0289 | 0.9356 |
| 51031 | H06 | 56500 | 9710   | KIAA0355  | -0.0289 | 0.9357 |
| 51003 | D06 | 52748 | 340596 | LHFPL1    | -0.0289 | 0.9357 |
| 11081 | C08 | 8118  | NA     | NA        | -0.0288 | 0.9358 |
| 11070 | E11 | 9646  | 84447  | SYVN1     | -0.0288 | 0.9359 |
| 51005 | B02 | 54167 | 50484  | RRM2B     | -0.0288 | 0.9359 |
| 31039 | C11 | 4732  | NA     | NA        | -0.0288 | 0.9359 |
| 11029 | F08 | 7530  | 51510  | CHMP5     | -0.0288 | 0.9359 |
| 11017 | H03 | 6589  | NA     | NA        | -0.0287 | 0.9360 |
| 11025 | G02 | 9774  | 51194  | IPO11     | -0.0287 | 0.9360 |
| 11074 | F12 | 1506  | 441519 | CT45A3    | -0.0287 | 0.9360 |
| 51031 | B05 | 53285 | 124808 | CCDC43    | -0.0287 | 0.9360 |
| 31011 | B11 | 12086 | 51027  | BOLA1     | -0.0287 | 0.9360 |
| 11019 | D01 | 9113  | 3887   | KRT81     | -0.0287 | 0.9360 |
| 11083 | F06 | 4464  | 1984   | EIF5A     | -0.0287 | 0.9361 |
| 31011 | F11 | 12213 | 155382 | VPS37D    | -0.0287 | 0.9361 |
| 11048 | B03 | 2610  | 5650   | KLK7      | -0.0287 | 0.9361 |
| 11062 | F12 | 5248  | 10226  | PLIN3     | -0.0287 | 0.9361 |
| 11070 | A07 | 7004  | 5905   | RANGAP1   | -0.0287 | 0.9362 |
| 11080 | B11 | 5025  | 23191  | CYFIP1    | -0.0286 | 0.9362 |
| 11008 | H04 | 235   | 55506  | H2AFY2    | -0.0286 | 0.9362 |
| 51032 | D06 | 55567 | 25915  | NDUFAF3   | -0.0286 | 0.9363 |
| 11085 | H09 | 9870  | 83445  | GSG1      | -0.0286 | 0.9363 |
| 11022 | C06 | 7331  | 55269  | PSPC1     | -0.0285 | 0.9364 |
| 31038 | B05 | 14541 | 170394 | PWWP2B    | -0.0285 | 0.9364 |
| 11028 | H07 | 6880  | 51545  | ZNF581    | -0.0285 | 0.9364 |
| 11004 | A11 | 3112  | 2948   | GSTM4     | -0.0285 | 0.9365 |
| 51030 | H08 | 53390 | 79993  | ELOVL7    | -0.0285 | 0.9366 |
| 11072 | G03 | 1589  | 11085  | ADAM30    | -0.0284 | 0.9366 |
| 11004 | H04 | 8559  | 5825   | ABCD3     | -0.0284 | 0.9367 |
| 51026 | E10 | 56915 | 491    | ATP2B2    | -0.0284 | 0.9367 |
| 31002 | E09 | 10493 | 1488   | CTBP2     | -0.0284 | 0.9367 |
| 51003 | E06 | 56762 | 6756   | SSX1      | -0.0284 | 0.9367 |
| 31003 | E01 | 10559 | 92140  | MTDH      | -0.0284 | 0.9367 |
| 51029 | E03 | 53330 | 253558 | LCLAT1    | -0.0283 | 0.9369 |
| 51003 | F01 | 52689 | 51481  | VCX3A     | -0.0283 | 0.9369 |
| 31021 | E01 | 13165 | 5733   | PTGER3    | -0.0283 | 0.9369 |
| 51018 | E05 | 56097 | 441493 | LOC441493 | -0.0283 | 0.9370 |
| 31043 | F07 | 7035  | 2624   | GATA2     | -0.0282 | 0.9371 |

|       |     |       |        |          |         |        |
|-------|-----|-------|--------|----------|---------|--------|
| 11007 | H04 | 3248  | 54964  | C1orf56  | -0.0282 | 0.9371 |
| 11016 | F01 | 6620  | 9502   | XAGE2    | -0.0282 | 0.9371 |
| 11056 | D10 | 1840  | 10238  | DCAF7    | -0.0282 | 0.9371 |
| 11049 | G09 | 496   | 29902  | C12orf24 | -0.0282 | 0.9371 |
| 51004 | H04 | 55770 | 79465  | ULBP3    | -0.0282 | 0.9371 |
| 31036 | D06 | 11691 | 10908  | PNPLA6   | -0.0282 | 0.9372 |
| 51026 | E05 | 56918 | 84547  | PGBD1    | -0.0281 | 0.9372 |
| 11076 | G02 | 4387  | 51760  | SYT17    | -0.0281 | 0.9373 |
| 51020 | G11 | 56204 | 2494   | NR5A2    | -0.0281 | 0.9373 |
| 31010 | G02 | 11554 | 29118  | DDX25    | -0.0281 | 0.9374 |
| 11042 | F04 | 9026  | 6342   | SCP2     | -0.0281 | 0.9374 |
| 31006 | G01 | 11201 | 10379  | IRF9     | -0.0281 | 0.9374 |
| 31006 | C03 | 10907 | 405    | ARNT     | -0.0281 | 0.9374 |
| 11030 | F04 | 7405  | 10935  | PRDX3    | -0.0281 | 0.9374 |
| 11001 | H08 | 598   | 6902   | TBCA     | -0.0280 | 0.9376 |
| 11063 | E11 | 5008  | 64745  | METT11D1 | -0.0280 | 0.9376 |
| 11043 | F01 | 8524  | 653808 | ZG16     | -0.0280 | 0.9376 |
| 51009 | C08 | 53504 | 283383 | GPR133   | -0.0280 | 0.9376 |
| 11006 | B10 | 1704  | 205327 | C2orf69  | -0.0280 | 0.9377 |
| 11026 | A12 | 8779  | 974    | CD79B    | -0.0280 | 0.9377 |
| 31004 | A12 | 11142 | 150372 | NFAM1    | -0.0279 | 0.9377 |
| 31031 | E08 | 14663 | 79133  | C20orf7  | -0.0279 | 0.9377 |
| 11086 | E11 | 4560  | 54587  | MXRA8    | -0.0279 | 0.9377 |
| 11022 | A05 | 7719  | 6300   | MAPK12   | -0.0279 | 0.9378 |
| 11087 | G10 | 2942  | 2130   | EWSR1    | -0.0279 | 0.9378 |
| 11037 | D11 | 6812  | 64755  | C16orf58 | -0.0278 | 0.9379 |
| 11064 | D10 | 6970  | 5663   | PSEN1    | -0.0278 | 0.9380 |
| 51008 | H01 | 53572 | 84893  | FBXO18   | -0.0278 | 0.9380 |
| 11029 | D02 | 6771  | 51016  | FAM158A  | -0.0278 | 0.9380 |
| 31040 | E01 | 8122  | 4915   | NTRK2    | -0.0278 | 0.9381 |
| 11087 | H02 | 1175  | 10085  | EDIL3    | -0.0278 | 0.9381 |
| 11082 | F03 | 8823  | 10213  | PSMD14   | -0.0277 | 0.9381 |
| 11025 | D02 | 4566  | 3098   | HK1      | -0.0277 | 0.9382 |
| 31039 | D09 | 914   | 6665   | SOX15    | -0.0277 | 0.9382 |
| 31022 | A04 | 13352 | 84105  | PCBD2    | -0.0277 | 0.9383 |
| 11062 | H11 | 4190  | 10195  | ALG3     | -0.0276 | 0.9384 |
| 31005 | B02 | 11170 | 135398 | C6orf141 | -0.0276 | 0.9384 |
| 11057 | G04 | 72    | 5510   | PPP1R7   | -0.0276 | 0.9384 |
| 31001 | E05 | 10441 | 9364   | RAB28    | -0.0276 | 0.9384 |
| 11085 | A06 | 8334  | 6783   | SULT1E1  | -0.0276 | 0.9384 |
| 11084 | F10 | 599   | 9718   | ECE2     | -0.0276 | 0.9384 |
| 51008 | F01 | 54203 | 3674   | ITGA2B   | -0.0276 | 0.9385 |
| 51005 | G07 | 55359 | 8542   | APOL1    | -0.0276 | 0.9385 |
| 31007 | E12 | 11426 | 8266   | UBL4A    | -0.0275 | 0.9386 |

|       |     |       |        |           |         |        |
|-------|-----|-------|--------|-----------|---------|--------|
| 31025 | F07 | 13416 | 4926   | NUMA1     | -0.0275 | 0.9386 |
| 11012 | E01 | 3907  | 7205   | TRIP6     | -0.0275 | 0.9387 |
| 51033 | D09 | 54938 | 642947 | LOC642947 | -0.0275 | 0.9387 |
| 51015 | D10 | 52853 | 27287  | VENTX     | -0.0275 | 0.9387 |
| 31037 | A05 | 12877 | 5876   | RABGGTB   | -0.0275 | 0.9387 |
| 11044 | F09 | 2686  | 11315  | PARK7     | -0.0274 | 0.9388 |
| 11006 | B08 | 9574  | 144453 | BEST3     | -0.0274 | 0.9388 |
| 31034 | F01 | 14943 | 915    | CD3D      | -0.0274 | 0.9388 |
| 11032 | D03 | 8685  | 1912   | PHC2      | -0.0274 | 0.9389 |
| 11029 | A08 | 8830  | 6252   | RTN1      | -0.0274 | 0.9389 |
| 11060 | C11 | 561   | 2150   | F2RL1     | -0.0274 | 0.9390 |
| 11009 | D05 | 7445  | 29947  | DNMT3L    | -0.0274 | 0.9390 |
| 11071 | G03 | 404   | 79867  | TCTN2     | -0.0273 | 0.9390 |
| 11066 | F06 | 6992  | 26094  | DCAF4     | -0.0273 | 0.9390 |
| 11004 | E10 | 2570  | 283870 | C16orf79  | -0.0273 | 0.9391 |
| 11025 | F08 | 5906  | 22880  | MORC2     | -0.0273 | 0.9391 |
| 31044 | A10 | 1139  | 124491 | TMEM170A  | -0.0273 | 0.9391 |
| 11029 | E07 | 2762  | 11015  | KDELR3    | -0.0273 | 0.9391 |
| 11042 | H11 | 6362  | 2993   | GYPA      | -0.0273 | 0.9391 |
| 11021 | E10 | 5787  | 10481  | HOXB13    | -0.0273 | 0.9392 |
| 11075 | A06 | 1867  | 122651 | RNASE11   | -0.0272 | 0.9392 |
| 11077 | C11 | 10203 | 64419  | MTMR14    | -0.0272 | 0.9392 |
| 11022 | E09 | 7825  | 84957  | RELT      | -0.0272 | 0.9392 |
| 11072 | C08 | 3791  | 26155  | NOC2L     | -0.0272 | 0.9393 |
| 51003 | D01 | 52677 | 84033  | OBSCN     | -0.0272 | 0.9393 |
| 11002 | H10 | 9501  | 132228 | C3orf45   | -0.0272 | 0.9393 |
| 11056 | F06 | 6776  | 6941   | TCF19     | -0.0272 | 0.9393 |
| 51001 | D05 | 55442 | 6636   | SNRPF     | -0.0272 | 0.9393 |
| 11059 | G11 | 1676  | 51268  | PIPOX     | -0.0272 | 0.9394 |
| 31017 | F07 | 12474 | 9869   | SETDB1    | -0.0271 | 0.9394 |
| 51016 | F10 | 56778 | 90133  | KRT8P12   | -0.0271 | 0.9394 |
| 31001 | E09 | 10444 | 148479 | PHF13     | -0.0271 | 0.9395 |
| 11061 | E10 | 4815  | 1454   | CSNK1E    | -0.0271 | 0.9395 |
| 31004 | C09 | 11096 | 123920 | CMTM3     | -0.0271 | 0.9395 |
| 11038 | E05 | 6215  | 10536  | LEPREL2   | -0.0271 | 0.9395 |
| 11079 | E01 | 7971  | 10058  | ABCB6     | -0.0271 | 0.9395 |
| 11073 | H02 | 3931  | 79095  | C9orf16   | -0.0270 | 0.9396 |
| 11051 | B10 | 899   | 7265   | TTC1      | -0.0270 | 0.9397 |
| 51013 | A11 | 54271 | 150572 | SMYD1     | -0.0270 | 0.9397 |
| 11017 | C09 | 7506  | 56907  | SPIRE1    | -0.0270 | 0.9397 |
| 11043 | D07 | 5762  | 51187  | RSL24D1   | -0.0270 | 0.9398 |
| 11083 | F04 | 2806  | 64221  | ROBO3     | -0.0270 | 0.9398 |
| 11063 | C06 | 8117  | 5521   | PPP2R2B   | -0.0270 | 0.9398 |
| 11028 | F04 | 9606  | 121053 | C12orf45  | -0.0270 | 0.9398 |

|       |     |       |        |           |         |        |
|-------|-----|-------|--------|-----------|---------|--------|
| 11004 | B03 | 620   | 27166  | PRELID1   | -0.0269 | 0.9399 |
| 51035 | G08 | 54272 | 158506 | ZNF645    | -0.0269 | 0.9400 |
| 11088 | E01 | 9981  | 28378  | IGHV7-81  | -0.0269 | 0.9400 |
| 11089 | H01 | 1740  | 585    | BBS4      | -0.0269 | 0.9400 |
| 51022 | H11 | 56327 | 7871   | SLMAP     | -0.0269 | 0.9400 |
| 31039 | F12 | 8671  | 9912   | RICH2     | -0.0269 | 0.9400 |
| 51023 | H11 | 56425 | 63897  | HEATR6    | -0.0268 | 0.9401 |
| 11013 | H03 | 289   | 3312   | HSPA8     | -0.0268 | 0.9401 |
| 31004 | B09 | 11028 | 6427   | SRSF2     | -0.0268 | 0.9401 |
| 11047 | G08 | 4186  | 7171   | TPM4      | -0.0268 | 0.9401 |
| 11015 | B08 | 5236  | 84837  | C14orf128 | -0.0268 | 0.9402 |
| 11019 | A01 | 9157  | 136853 | SRCRB4D   | -0.0268 | 0.9402 |
| 51004 | F03 | 52917 | 353376 | TICAM2    | -0.0267 | 0.9403 |
| 11054 | C06 | 430   | 29920  | PYCR2     | -0.0267 | 0.9403 |
| 11079 | C06 | 5193  | 55526  | DHTKD1    | -0.0267 | 0.9403 |
| 51009 | G03 | 53086 | 9967   | THRAP3    | -0.0267 | 0.9403 |
| 11007 | D04 | 5190  | 65992  | DDRKG1    | -0.0267 | 0.9405 |
| 11083 | E09 | 29    | 1153   | CIRBP     | -0.0266 | 0.9405 |
| 11066 | H02 | 9919  | 1959   | EGR2      | -0.0266 | 0.9406 |
| 11016 | G03 | 3866  | 51734  | SEPX1     | -0.0266 | 0.9406 |
| 51010 | E10 | 53926 | 80315  | CPEB4     | -0.0266 | 0.9406 |
| 31041 | G08 | 3957  | 120227 | CYP2R1    | -0.0265 | 0.9407 |
| 11040 | A10 | 7126  | 116832 | RPL39L    | -0.0265 | 0.9407 |
| 31014 | H03 | 12141 | 113201 | CASC4     | -0.0265 | 0.9408 |
| 11013 | G04 | 6605  | 28976  | ACAD9     | -0.0265 | 0.9408 |
| 31020 | C12 | 13253 | 55871  | CBWD1     | -0.0265 | 0.9408 |
| 51031 | C01 | 55417 | 245812 | CNPY4     | -0.0265 | 0.9408 |
| 11060 | B04 | 5093  | 84283  | TMEM79    | -0.0265 | 0.9409 |
| 11080 | D09 | 9933  | 9110   | MTMR4     | -0.0264 | 0.9409 |
| 11032 | G02 | 7608  | 1513   | CTSK      | -0.0264 | 0.9409 |
| 11039 | F03 | 2066  | 10926  | DBF4      | -0.0264 | 0.9410 |
| 11068 | E01 | 7696  | 10083  | USH1C     | -0.0264 | 0.9411 |
| 31001 | D08 | 10284 | 57602  | USP36     | -0.0263 | 0.9411 |
| 51013 | D03 | 55012 | 55188  | RIC8B     | -0.0263 | 0.9412 |
| 31022 | C11 | 13421 | 89927  | C16orf45  | -0.0263 | 0.9412 |
| 51003 | D11 | 54458 | 85287  | KRTAP4-7  | -0.0263 | 0.9412 |
| 51021 | A09 | 56646 | 11107  | PRDM5     | -0.0263 | 0.9412 |
| 11070 | A01 | 6979  | 83939  | EIF2A     | -0.0263 | 0.9413 |
| 51014 | B10 | 52710 | 64816  | CYP3A43   | -0.0263 | 0.9413 |
| 51002 | B05 | 52636 | 8330   | HIST1H2AK | -0.0262 | 0.9414 |
| 11059 | D04 | 2502  | 5494   | PPM1A     | -0.0262 | 0.9414 |
| 11073 | B07 | 1480  | 414061 | DNAJB3    | -0.0262 | 0.9414 |
| 11083 | C03 | 9850  | 374659 | HDDC3     | -0.0262 | 0.9414 |
| 11084 | D07 | 3539  | 83930  | STARD3NL  | -0.0262 | 0.9415 |

|       |     |       |           |            |         |        |
|-------|-----|-------|-----------|------------|---------|--------|
| 31016 | H05 | 12415 | 1266      | CNN3       | -0.0262 | 0.9415 |
| 11081 | A09 | 7952  | 100272147 | MTCP1NB    | -0.0262 | 0.9415 |
| 11073 | D08 | 4360  | 51619     | UBE2D4     | -0.0262 | 0.9415 |
| 51005 | A10 | 53541 | 7693      | ZNF134     | -0.0261 | 0.9416 |
| 11045 | A05 | 9622  | 54495     | TMX3       | -0.0261 | 0.9416 |
| 11012 | D05 | 3601  | 9791      | PTDSS1     | -0.0261 | 0.9416 |
| 51015 | D06 | 52686 | 29986     | SLC39A2    | -0.0261 | 0.9416 |
| 11069 | E11 | 663   | 1066      | CES1       | -0.0261 | 0.9416 |
| 11022 | G06 | 8021  | 5476      | CTSA       | -0.0261 | 0.9417 |
| 11035 | D10 | 8662  | 9411      | ARHGAP29   | -0.0261 | 0.9417 |
| 31044 | E10 | 3110  | 8543      | LMO4       | -0.0261 | 0.9417 |
| 11085 | A12 | 2593  | 2771      | GNAI2      | -0.0261 | 0.9417 |
| 11074 | H01 | 3855  | 1026      | CDKN1A     | -0.0261 | 0.9418 |
| 11082 | E11 | 1211  | 646470    | LOC646470  | -0.0260 | 0.9418 |
| 11068 | F04 | 4799  | 84818     | IL17RC     | -0.0260 | 0.9418 |
| 11057 | G11 | 2321  | 11149     | BVES       | -0.0260 | 0.9419 |
| 51033 | C01 | 56934 | 646938    | LOC646938  | -0.0260 | 0.9419 |
| 51031 | H07 | 53377 | 284369    | C19orf75   | -0.0260 | 0.9419 |
| 31038 | F09 | 8865  | 9844      | ELMO1      | -0.0259 | 0.9420 |
| 31006 | F02 | 11319 | 26263     | FBXO22     | -0.0259 | 0.9420 |
| 51025 | C12 | 53262 | 22930     | RAB3GAP1   | -0.0259 | 0.9420 |
| 51030 | C04 | 53260 | 415116    | PIM3       | -0.0259 | 0.9421 |
| 31001 | F08 | 10674 | 6457      | SH3GL3     | -0.0259 | 0.9421 |
| 11051 | B06 | 5419  | 6468      | FBXW4      | -0.0259 | 0.9421 |
| 31008 | A07 | 11801 | 10400     | PEMT       | -0.0259 | 0.9421 |
| 11056 | G09 | 6899  | 56288     | PARD3      | -0.0259 | 0.9421 |
| 51006 | D02 | 54971 | 51622     | CCZ1       | -0.0259 | 0.9422 |
| 31022 | C09 | 13756 | 124402    | FAM100A    | -0.0259 | 0.9422 |
| 51035 | A11 | 55082 | 80108     | ZFP2       | -0.0258 | 0.9422 |
| 31039 | G01 | 6424  | 4057      | LTF        | -0.0258 | 0.9423 |
| 11069 | H11 | 6512  | 7337      | UBE3A      | -0.0258 | 0.9423 |
| 11085 | G04 | 8318  | 126364    | LRRC25     | -0.0258 | 0.9424 |
| 11005 | B04 | 760   | 25941     | C18orf10   | -0.0258 | 0.9424 |
| 11047 | C06 | 4776  | 92960     | PEX11G     | -0.0258 | 0.9424 |
| 11007 | G05 | 3367  | 81849     | ST6GALNAC5 | -0.0258 | 0.9424 |
| 31006 | E07 | 11267 | 2078      | ERG        | -0.0257 | 0.9424 |
| 51030 | D12 | 55302 | 56937     | PMEPA1     | -0.0257 | 0.9425 |
| 11038 | B12 | 6254  | 1602      | DACH1      | -0.0257 | 0.9425 |
| 51028 | D07 | 55375 | 7773      | ZNF230     | -0.0257 | 0.9426 |
| 51025 | H10 | 56874 | 23074     | UHRF1BP1L  | -0.0257 | 0.9426 |
| 31010 | F09 | 11424 | 51667     | NUB1       | -0.0256 | 0.9427 |
| 11007 | F08 | 7730  | 30        | ACAA1      | -0.0256 | 0.9428 |
| 31026 | D07 | 13894 | 3203      | HOXA6      | -0.0255 | 0.9429 |
| 11025 | C05 | 7282  | 84498     | FAM120B    | -0.0255 | 0.9429 |

|       |     |       |        |          |         |        |
|-------|-----|-------|--------|----------|---------|--------|
| 51025 | C10 | 55579 | 65123  | INTS3    | -0.0255 | 0.9429 |
| 11044 | G07 | 4725  | 6133   | RPL9     | -0.0255 | 0.9429 |
| 11016 | D10 | 7420  | 54205  | CYCS     | -0.0255 | 0.9431 |
| 51028 | B05 | 56401 | 285489 | DOK7     | -0.0255 | 0.9431 |
| 51020 | A12 | 53167 | 1687   | DFNA5    | -0.0254 | 0.9431 |
| 31014 | D11 | 11893 | 6569   | SLC34A1  | -0.0254 | 0.9431 |
| 31017 | F10 | 12849 | 130888 | FBXO36   | -0.0254 | 0.9431 |
| 31012 | A12 | 12216 | 284131 | FLJ35220 | -0.0254 | 0.9431 |
| 11080 | H08 | 6127  | 9698   | PUM1     | -0.0254 | 0.9431 |
| 31029 | C12 | 14301 | 5718   | PSMD12   | -0.0254 | 0.9432 |
| 11085 | B09 | 3492  | 8666   | EIF3G    | -0.0254 | 0.9432 |
| 31004 | A02 | 10505 | 66008  | TRAK2    | -0.0254 | 0.9432 |
| 11006 | D06 | 2870  | 6251   | RSU1     | -0.0254 | 0.9432 |
| 11060 | F11 | 8078  | 285527 | FRYL     | -0.0254 | 0.9433 |
| 31040 | A08 | 9311  | 5409   | PNMT     | -0.0254 | 0.9433 |
| 11049 | F03 | 4747  | 55611  | OTUB1    | -0.0254 | 0.9433 |
| 31002 | E04 | 10717 | 254122 | SNX32    | -0.0253 | 0.9433 |
| 31003 | A03 | 10526 | 2571   | GAD1     | -0.0253 | 0.9434 |
| 51030 | D04 | 56547 | 79931  | TNIP3    | -0.0253 | 0.9434 |
| 11009 | A04 | 7139  | 71     | ACTG1    | -0.0253 | 0.9434 |
| 11043 | H09 | 6904  | 56005  | C19orf10 | -0.0253 | 0.9434 |
| 51001 | B05 | 52570 | 56990  | CDC42SE2 | -0.0253 | 0.9434 |
| 11059 | F03 | 4773  | 222    | ALDH3B2  | -0.0253 | 0.9435 |
| 51025 | B03 | 53144 | 284403 | WDR62    | -0.0253 | 0.9435 |
| 51014 | E03 | 54037 | 119548 | PNLIPRP3 | -0.0252 | 0.9435 |
| 31040 | C08 | 9418  | 3293   | HSD17B3  | -0.0252 | 0.9435 |
| 51009 | D09 | 53627 | 205147 | FAM123C  | -0.0252 | 0.9436 |
| 11063 | E06 | 2270  | 153733 | CCDC112  | -0.0252 | 0.9436 |
| 31001 | G11 | 10331 | 134285 | TMEM171  | -0.0252 | 0.9436 |
| 11025 | D12 | 1345  | 26036  | ZNF451   | -0.0252 | 0.9436 |
| 11049 | F06 | 6420  | 55611  | OTUB1    | -0.0252 | 0.9437 |
| 11002 | D12 | 9019  | 10558  | SPTLC1   | -0.0252 | 0.9437 |
| 11014 | E06 | 6232  | 7869   | SEMA3B   | -0.0251 | 0.9437 |
| 31022 | F02 | 13368 | 147699 | PPM1N    | -0.0251 | 0.9438 |
| 11004 | B05 | 602   | 9545   | RAB3D    | -0.0251 | 0.9438 |
| 11085 | G07 | 6954  | 7351   | UCP2     | -0.0251 | 0.9439 |
| 11052 | H05 | 5533  | 5537   | PPP6C    | -0.0250 | 0.9440 |
| 51013 | F12 | 52931 | 2115   | ETV1     | -0.0250 | 0.9440 |
| 31016 | E03 | 12542 | 595    | CCND1    | -0.0250 | 0.9440 |
| 31030 | F07 | 14327 | 83538  | TTC25    | -0.0250 | 0.9441 |
| 11013 | C08 | 5958  | 9985   | REC8     | -0.0250 | 0.9441 |
| 11064 | H07 | 9445  | 9314   | KLF4     | -0.0250 | 0.9441 |
| 11027 | F11 | 6759  | 6233   | RPS27A   | -0.0250 | 0.9442 |
| 11028 | F02 | 3306  | 1719   | DHFR     | -0.0249 | 0.9442 |

|       |     |       |        |           |         |        |
|-------|-----|-------|--------|-----------|---------|--------|
| 11019 | F11 | 6520  | 112752 | C14orf179 | -0.0249 | 0.9442 |
| 31017 | C10 | 12887 | 10777  | ARPP21    | -0.0249 | 0.9442 |
| 51020 | E09 | 56235 | 124535 | HSF5      | -0.0249 | 0.9443 |
| 11047 | G09 | 5745  | 84294  | UTP23     | -0.0249 | 0.9443 |
| 11058 | B01 | 4487  | 25886  | POC1A     | -0.0249 | 0.9443 |
| 11087 | B05 | 2878  | 9328   | GTF3C5    | -0.0249 | 0.9444 |
| 11078 | F04 | 1418  | 10512  | SEMA3C    | -0.0249 | 0.9444 |
| 31024 | A08 | 13701 | 114880 | OSBPL6    | -0.0249 | 0.9444 |
| 31016 | A06 | 12545 | 24140  | FTSJ1     | -0.0248 | 0.9444 |
| 11084 | H01 | 8746  | 7574   | ZNF26     | -0.0248 | 0.9444 |
| 11041 | H01 | 5985  | 23612  | PHLDA3    | -0.0248 | 0.9444 |
| 11050 | H04 | 4210  | 8612   | PPAP2C    | -0.0248 | 0.9444 |
| 31033 | B05 | 14730 | 4000   | LMNA      | -0.0248 | 0.9444 |
| 11080 | A08 | 1855  | 144406 | WDR66     | -0.0248 | 0.9445 |
| 11010 | C12 | 306   | 10294  | DNAJA2    | -0.0248 | 0.9445 |
| 11080 | G03 | 4619  | 60528  | ELAC2     | -0.0248 | 0.9446 |
| 11030 | E06 | 8221  | 118472 | ZNF511    | -0.0248 | 0.9446 |
| 11018 | C07 | 3683  | 7327   | UBE2G2    | -0.0247 | 0.9446 |
| 11012 | F09 | 8230  | 1198   | CLK3      | -0.0247 | 0.9446 |
| 31031 | C02 | 14578 | 8294   | HIST1H4I  | -0.0247 | 0.9446 |
| 31023 | C03 | 13743 | 26040  | SETBP1    | -0.0247 | 0.9447 |
| 11013 | C07 | 871   | 25999  | CLIP3     | -0.0247 | 0.9447 |
| 51010 | A09 | 53760 | 128876 | FAM83C    | -0.0247 | 0.9447 |
| 31041 | H11 | 3888  | 5432   | POLR2C    | -0.0247 | 0.9447 |
| 51027 | G08 | 56933 | 340359 | KLHL38    | -0.0247 | 0.9447 |
| 51002 | H11 | 54869 | 337880 | KRTAP11-1 | -0.0247 | 0.9447 |
| 51033 | G04 | 53529 | 7120   | TMSL6     | -0.0247 | 0.9447 |
| 51013 | D11 | 53843 | 26156  | RSL1D1    | -0.0247 | 0.9448 |
| 51011 | E12 | 54041 | 284353 | NKPD1     | -0.0247 | 0.9448 |
| 51013 | E05 | 52772 | 285641 | SLC36A3   | -0.0246 | 0.9448 |
| 11005 | A05 | 767   | 91801  | ALKBH8    | -0.0246 | 0.9449 |
| 11086 | D05 | 2780  | 1992   | SERPINB1  | -0.0246 | 0.9449 |
| 51006 | E03 | 54304 | 285    | ANGPT2    | -0.0246 | 0.9449 |
| 11066 | G05 | 2492  | 7439   | BEST1     | -0.0246 | 0.9449 |
| 31041 | G03 | 6872  | 10535  | RNASEH2A  | -0.0246 | 0.9449 |
| 11012 | E08 | 7465  | 2624   | GATA2     | -0.0246 | 0.9450 |
| 51005 | D10 | 56814 | 7127   | TNFAIP2   | -0.0246 | 0.9450 |
| 31013 | G04 | 12320 | 2967   | GTF2H3    | -0.0245 | 0.9451 |
| 11068 | D10 | 1953  | 147694 | ZNF548    | -0.0245 | 0.9451 |
| 51001 | G04 | 53208 | 387882 | C12orf75  | -0.0245 | 0.9451 |
| 31002 | A05 | 10378 | 57590  | WDFY1     | -0.0245 | 0.9451 |
| 11028 | H08 | 8852  | 140459 | ASB6      | -0.0245 | 0.9452 |
| 31019 | H08 | 12853 | 5689   | PSMB1     | -0.0244 | 0.9453 |
| 11055 | C09 | 6860  | 196483 | FAM86A    | -0.0244 | 0.9453 |



|       |     |       |        |          |         |        |
|-------|-----|-------|--------|----------|---------|--------|
| 11007 | E12 | 7093  | 78999  | LRFN4    | -0.0244 | 0.9453 |
| 11020 | G02 | 5635  | 5684   | PSMA3    | -0.0244 | 0.9453 |
| 11076 | A12 | 4858  | 83694  | RPS6KL1  | -0.0244 | 0.9453 |
| 11016 | B10 | 7574  | 196872 | MGC23270 | -0.0244 | 0.9454 |
| 11032 | B03 | 8185  | 2212   | FCGR2A   | -0.0244 | 0.9454 |
| 11075 | B10 | 4067  | 54797  | MED18    | -0.0243 | 0.9455 |
| 11046 | F09 | 4113  | 93408  | MYL10    | -0.0243 | 0.9455 |
| 11074 | E11 | 8704  | 64097  | EPB41L4A | -0.0243 | 0.9456 |
| 31034 | A02 | 14856 | 164668 | APOBEC3H | -0.0243 | 0.9456 |
| 51035 | A08 | 53711 | 5230   | PGK1     | -0.0243 | 0.9456 |
| 11017 | A09 | 7806  | 6160   | RPL31    | -0.0243 | 0.9456 |
| 51035 | G06 | 53822 | 337    | APOA4    | -0.0242 | 0.9458 |
| 11014 | D04 | 2307  | 51514  | DTL      | -0.0242 | 0.9458 |
| 11047 | B06 | 748   | 131601 | TPRA1    | -0.0242 | 0.9458 |
| 11076 | F07 | 4592  | 51130  | ASB3     | -0.0242 | 0.9458 |
| 11038 | H10 | 1777  | 80790  | CMIP     | -0.0242 | 0.9458 |
| 51001 | F07 | 54767 | 441525 | SPANXN4  | -0.0242 | 0.9459 |
| 51013 | E04 | 52936 | 6571   | SLC18A2  | -0.0242 | 0.9459 |
| 31009 | B01 | 11767 | 3921   | RPSA     | -0.0241 | 0.9459 |
| 11045 | H04 | 2053  | 221468 | TMEM217  | -0.0241 | 0.9459 |
| 11084 | E06 | 2416  | 10682  | EBP      | -0.0241 | 0.9459 |
| 11043 | G10 | 939   | 26258  | PLDN     | -0.0241 | 0.9460 |
| 11055 | E12 | 8851  | 81557  | MAGED4B  | -0.0241 | 0.9460 |
| 31019 | G11 | 13228 | 5684   | PSMA3    | -0.0241 | 0.9460 |
| 11016 | F12 | 5746  | 84299  | C17orf37 | -0.0241 | 0.9460 |
| 11050 | D04 | 6672  | 2273   | FHL1     | -0.0241 | 0.9460 |
| 11063 | E07 | 9575  | 255057 | C19orf26 | -0.0241 | 0.9460 |
| 51002 | H03 | 54948 | 389658 | FAM150A  | -0.0241 | 0.9461 |
| 31006 | H04 | 11251 | 9617   | MTRF1    | -0.0241 | 0.9461 |
| 51033 | E04 | 56496 | 96597  | TBC1D27  | -0.0241 | 0.9461 |
| 11021 | G10 | 3611  | 51063  | CALHM2   | -0.0241 | 0.9461 |
| 31001 | A12 | 10802 | 133418 | EMB      | -0.0241 | 0.9461 |
| 31039 | C08 | 8812  | 23087  | TRIM35   | -0.0240 | 0.9461 |
| 11066 | F03 | 10173 | 954    | ENTPD2   | -0.0240 | 0.9462 |
| 51001 | D01 | 54610 | 326343 | MT1DP    | -0.0240 | 0.9462 |
| 11050 | H11 | 4534  | 51759  | C9orf78  | -0.0240 | 0.9462 |
| 11013 | A08 | 8508  | 6097   | RORC     | -0.0240 | 0.9462 |
| 11006 | E06 | 8270  | 54033  | RBM11    | -0.0240 | 0.9462 |
| 51005 | B04 | 54457 | 8514   | KCNAB2   | -0.0240 | 0.9463 |
| 11017 | D10 | 3728  | 56905  | C15orf39 | -0.0240 | 0.9463 |
| 11068 | E07 | 8281  | 5153   | PDE1B    | -0.0239 | 0.9464 |
| 11027 | D01 | 36    | 23589  | CARHSP1  | -0.0239 | 0.9465 |
| 51033 | B01 | 55325 | 374875 | HSD11B1L | -0.0239 | 0.9465 |
| 51026 | G06 | 55269 | 1001   | CDH3     | -0.0239 | 0.9465 |

|       |     |       |        |          |         |        |
|-------|-----|-------|--------|----------|---------|--------|
| 31040 | A12 | 7561  | 10424  | PGRMC2   | -0.0238 | 0.9466 |
| 11087 | G02 | 3868  | 84765  | ZNF577   | -0.0238 | 0.9466 |
| 51013 | C01 | 53055 | 55732  | C1orf112 | -0.0238 | 0.9466 |
| 51012 | D10 | 54268 | 53630  | BCMO1    | -0.0238 | 0.9467 |
| 31045 | A06 | 9412  | 57472  | CNOT6    | -0.0238 | 0.9467 |
| 11066 | E09 | 10217 | 9751   | SNPH     | -0.0238 | 0.9467 |
| 51033 | H03 | 53428 | 7114   | TMSB4X   | -0.0238 | 0.9467 |
| 11076 | H09 | 4557  | 9943   | OXSR1    | -0.0238 | 0.9468 |
| 51018 | D03 | 56758 | 7258   | TSPY1    | -0.0237 | 0.9468 |
| 11078 | B03 | 8309  | 2162   | F13A1    | -0.0237 | 0.9468 |
| 11028 | E06 | 9158  | 5034   | P4HB     | -0.0237 | 0.9469 |
| 11077 | H05 | 4549  | 10611  | PDLIM5   | -0.0237 | 0.9469 |
| 11041 | F04 | 6642  | 79616  | CCNJL    | -0.0237 | 0.9469 |
| 11086 | F05 | 5586  | 1158   | CKM      | -0.0237 | 0.9470 |
| 31041 | C01 | 7393  | 84876  | ORAI1    | -0.0236 | 0.9471 |
| 51026 | G07 | 53296 | 89876  | C3orf15  | -0.0236 | 0.9471 |
| 11049 | B11 | 1194  | 132204 | SYNPR    | -0.0236 | 0.9471 |
| 11068 | E06 | 1990  | 9655   | SOCS5    | -0.0236 | 0.9471 |
| 31042 | G09 | 5552  | 51528  | JKAMP    | -0.0236 | 0.9472 |
| 51003 | A07 | 52978 | 391    | RHOG     | -0.0236 | 0.9472 |
| 51006 | G03 | 53635 | 2303   | FOXC2    | -0.0235 | 0.9472 |
| 31039 | B03 | 6805  | 5598   | MAPK7    | -0.0235 | 0.9473 |
| 11037 | B08 | 3132  | 7385   | UQCRC2   | -0.0235 | 0.9473 |
| 11018 | G07 | 7536  | 54830  | NUP62CL  | -0.0235 | 0.9473 |
| 11029 | E01 | 6754  | 11235  | PDCD10   | -0.0235 | 0.9473 |
| 11086 | D10 | 9180  | 80201  | HKDC1    | -0.0235 | 0.9474 |
| 51012 | G09 | 52781 | 134359 | POC5     | -0.0235 | 0.9474 |
| 11028 | H06 | 4459  | 51501  | C11orf73 | -0.0235 | 0.9474 |
| 11027 | C05 | 3441  | 6223   | RPS19    | -0.0234 | 0.9474 |
| 11075 | B11 | 3801  | 578    | BAK1     | -0.0234 | 0.9474 |
| 31006 | E04 | 10820 | 2104   | ESRRG    | -0.0234 | 0.9475 |
| 11026 | D01 | 574   | 51316  | PLAC8    | -0.0234 | 0.9476 |
| 11083 | A11 | 2677  | 765    | CA6      | -0.0234 | 0.9476 |
| 11010 | D06 | 529   | 1455   | CSNK1G2  | -0.0234 | 0.9476 |
| 31016 | D05 | 12484 | 51377  | UCHL5    | -0.0234 | 0.9476 |
| 51009 | D11 | 54308 | 5318   | PKP2     | -0.0233 | 0.9477 |
| 31045 | B01 | 253   | 226    | ALDOA    | -0.0233 | 0.9477 |
| 51012 | F10 | 52743 | 200081 | TXLNA    | -0.0233 | 0.9477 |
| 31038 | D06 | 14274 | 7405   | UVRAG    | -0.0233 | 0.9477 |
| 11071 | G06 | 9679  | 83448  | PUS7L    | -0.0233 | 0.9478 |
| 11056 | C12 | 3038  | 1385   | CREB1    | -0.0233 | 0.9478 |
| 11069 | F02 | 2303  | 284076 | TTLL6    | -0.0233 | 0.9479 |
| 11039 | C10 | 3370  | 1627   | DBN1     | -0.0232 | 0.9479 |
| 31043 | G07 | 6475  | 948    | CD36     | -0.0232 | 0.9479 |

|       |     |       |        |              |         |        |
|-------|-----|-------|--------|--------------|---------|--------|
| 11060 | D01 | 3821  | 10449  | ACAA2        | -0.0232 | 0.9480 |
| 11085 | D08 | 2938  | 79583  | TMEM231      | -0.0232 | 0.9480 |
| 11038 | B03 | 5328  | 79744  | ZNF419       | -0.0232 | 0.9480 |
| 51029 | B12 | 53388 | 80006  | C5orf44      | -0.0232 | 0.9480 |
| 11056 | A10 | 2909  | 7023   | TFAP4        | -0.0232 | 0.9480 |
| 31031 | G03 | 14612 | 3605   | IL17A        | -0.0232 | 0.9480 |
| 11065 | E04 | 5105  | 7448   | VTN          | -0.0232 | 0.9481 |
| 31039 | A10 | 1166  | 154661 | RUNDC3B      | -0.0231 | 0.9481 |
| 51013 | A06 | 54427 | 220963 | SLC16A9      | -0.0231 | 0.9481 |
| 51017 | E05 | 55908 | 10876  | EDDM3A       | -0.0231 | 0.9482 |
| 51024 | C12 | 53375 | 2975   | GTF3C1       | -0.0231 | 0.9482 |
| 11057 | E10 | 4771  | 7918   | BAT4         | -0.0231 | 0.9483 |
| 51005 | H07 | 54689 | 7978   | MTERF        | -0.0230 | 0.9483 |
| 31014 | D08 | 12025 | 5551   | PRF1         | -0.0230 | 0.9484 |
| 31036 | F10 | 13176 | 4494   | MT1F         | -0.0230 | 0.9484 |
| 51015 | F05 | 53042 | 23409  | SIRT4        | -0.0230 | 0.9485 |
| 11042 | D09 | 6935  | 10597  | TRAPPC2P1    | -0.0230 | 0.9485 |
| 11053 | H03 | 9488  | 11238  | CA5B         | -0.0229 | 0.9485 |
| 11030 | G01 | 9561  | 25830  | SULT4A1      | -0.0229 | 0.9486 |
| 51004 | H08 | 55061 | 203076 | C8orf74      | -0.0229 | 0.9486 |
| 11012 | E05 | 3909  | 11052  | CPSF6        | -0.0229 | 0.9486 |
| 11087 | A11 | 7920  | 6490   | SILV         | -0.0229 | 0.9486 |
| 11050 | G07 | 6931  | 29982  | NRBF2        | -0.0229 | 0.9487 |
| 11017 | E12 | 6136  | 5433   | POLR2D       | -0.0229 | 0.9487 |
| 11036 | C09 | 3622  | 29927  | SEC61A1      | -0.0229 | 0.9487 |
| 11001 | B08 | 8805  | 27436  | EML4         | -0.0229 | 0.9487 |
| 31019 | G07 | 13305 | 5685   | PSMA4        | -0.0229 | 0.9487 |
| 31017 | E11 | 13008 | 6364   | CCL20        | -0.0228 | 0.9488 |
| 31033 | A05 | 14792 | 4661   | MYT1         | -0.0228 | 0.9488 |
| 31038 | C07 | 9415  | 5781   | PTPN11       | -0.0228 | 0.9489 |
| 31033 | F07 | 14861 | 285074 | LOC285074    | -0.0228 | 0.9489 |
| 11046 | D10 | 8719  | 79887  | PLBD1        | -0.0227 | 0.9490 |
| 11057 | F06 | 8417  | 971    | CD72         | -0.0227 | 0.9490 |
| 11020 | A08 | 7770  | 91056  | DKFZp761E198 | -0.0227 | 0.9491 |
| 11086 | D09 | 1398  | 83659  | TEKT1        | -0.0227 | 0.9491 |
| 31042 | E10 | 5818  | 6657   | SOX2         | -0.0227 | 0.9491 |
| 51033 | F01 | 55365 | NA     | NA           | -0.0227 | 0.9492 |
| 51034 | F11 | 53704 | 50837  | TAS2R7       | -0.0226 | 0.9492 |
| 51025 | C06 | 53191 | 55215  | FANCI        | -0.0226 | 0.9493 |
| 11009 | H10 | 5301  | 3880   | KRT19        | -0.0226 | 0.9493 |
| 31020 | G09 | 13192 | 54852  | PAQR5        | -0.0226 | 0.9493 |
| 31041 | E08 | 6118  | 10112  | KIF20A       | -0.0226 | 0.9493 |
| 51035 | D08 | 53912 | 10886  | NPFFR2       | -0.0226 | 0.9493 |
| 11074 | G02 | 2398  | 25828  | TXN2         | -0.0226 | 0.9494 |

|       |     |       |        |          |         |        |
|-------|-----|-------|--------|----------|---------|--------|
| 11015 | D11 | 5802  | 55970  | GNG12    | -0.0225 | 0.9495 |
| 11018 | F11 | 3527  | 84516  | DCTN5    | -0.0225 | 0.9495 |
| 51034 | G08 | 54310 | 482    | ATP1B2   | -0.0225 | 0.9495 |
| 51009 | D06 | 53795 | 22802  | CLCA4    | -0.0225 | 0.9495 |
| 11083 | G11 | 4590  | 55272  | IMP3     | -0.0225 | 0.9496 |
| 51020 | B07 | 56563 | 2863   | GPR39    | -0.0225 | 0.9496 |
| 11042 | C03 | 1362  | 3398   | ID2      | -0.0225 | 0.9496 |
| 51005 | C05 | 54578 | 29070  | CCDC113  | -0.0224 | 0.9497 |
| 11004 | E08 | 679   | 25895  | FAM119B  | -0.0224 | 0.9497 |
| 51025 | D06 | 56493 | 7143   | TNR      | -0.0224 | 0.9497 |
| 11046 | A01 | 2037  | 8382   | NME5     | -0.0224 | 0.9498 |
| 31041 | C08 | 5331  | 81691  | LOC81691 | -0.0224 | 0.9498 |
| 51024 | F09 | 55182 | 197131 | UBR1     | -0.0224 | 0.9498 |
| 51030 | E06 | 56034 | 191    | AHCY     | -0.0223 | 0.9498 |
| 51012 | H06 | 53111 | 81494  | CFHR5    | -0.0223 | 0.9499 |
| 11055 | F11 | 4692  | 3945   | LDHB     | -0.0223 | 0.9499 |
| 11077 | C07 | 4651  | 369    | ARAF     | -0.0223 | 0.9499 |
| 11053 | H02 | 5520  | 231    | AKR1B1   | -0.0223 | 0.9499 |
| 11068 | F11 | 6993  | 4848   | CNOT2    | -0.0223 | 0.9499 |
| 11073 | H06 | 4365  | 56063  | C1orf91  | -0.0223 | 0.9500 |
| 31016 | F02 | 12568 | 91647  | ATPAF2   | -0.0223 | 0.9500 |
| 11079 | A04 | 1722  | 116369 | SLC26A8  | -0.0223 | 0.9500 |
| 11032 | B10 | 6324  | 5507   | PPP1R3C  | -0.0223 | 0.9500 |
| 51031 | G04 | 56895 | 377047 | PRSS45   | -0.0223 | 0.9501 |
| 31041 | E07 | 5224  | 84959  | UBASH3B  | -0.0222 | 0.9501 |
| 11042 | D04 | 2381  | 10247  | HRSP12   | -0.0222 | 0.9502 |
| 51028 | D08 | 55279 | 55762  | ZNF701   | -0.0222 | 0.9502 |
| 11078 | A04 | 7110  | 3728   | JUP      | -0.0222 | 0.9502 |
| 11018 | E07 | 7122  | 79754  | ASB13    | -0.0222 | 0.9502 |
| 11046 | D11 | 8501  | 205    | AK4      | -0.0221 | 0.9503 |
| 31045 | D01 | 259   | 55080  | TAPBPL   | -0.0221 | 0.9504 |
| 11024 | B02 | 3895  | 57658  | CALCOCO1 | -0.0221 | 0.9504 |
| 11060 | E01 | 10245 | 10332  | CLEC4M   | -0.0221 | 0.9504 |
| 51003 | C03 | 53056 | 83899  | KRTAP9-2 | -0.0221 | 0.9504 |
| 51033 | C04 | 56138 | NA     | NA       | -0.0221 | 0.9504 |
| 11064 | A03 | 7909  | 26190  | FBXW2    | -0.0221 | 0.9504 |
| 11043 | A01 | 5126  | 5147   | PDE6D    | -0.0221 | 0.9504 |
| 11040 | A06 | 9087  | 29801  | ZDHHC8   | -0.0221 | 0.9505 |
| 31041 | F02 | 7590  | 126259 | TMIGD2   | -0.0220 | 0.9505 |
| 11024 | H08 | 9966  | 29882  | ANAPC2   | -0.0220 | 0.9505 |
| 51017 | A08 | 55982 | 79570  | NKAIN1   | -0.0220 | 0.9505 |
| 51009 | F05 | 52773 | 146862 | UNC45B   | -0.0220 | 0.9506 |
| 51012 | A05 | 54157 | 2868   | GRK4     | -0.0220 | 0.9506 |
| 11060 | D05 | 4386  | 661    | POLR3D   | -0.0220 | 0.9506 |

|       |     |       |        |          |         |        |
|-------|-----|-------|--------|----------|---------|--------|
| 31012 | D12 | 12308 | 89978  | ATPBD4   | -0.0220 | 0.9506 |
| 11013 | D02 | 8345  | 3560   | IL2RB    | -0.0220 | 0.9506 |
| 11003 | B02 | 9400  | 53833  | IL20RB   | -0.0220 | 0.9507 |
| 51009 | D07 | 54148 | 8573   | CASK     | -0.0219 | 0.9508 |
| 11022 | G10 | 3919  | 29015  | SLC43A3  | -0.0219 | 0.9508 |
| 11088 | F01 | 8774  | 124460 | SNX20    | -0.0219 | 0.9508 |
| 11088 | E06 | 10133 | 2865   | FFAR3    | -0.0219 | 0.9508 |
| 31016 | E01 | 12591 | 6836   | SURF4    | -0.0219 | 0.9508 |
| 51020 | D07 | 56783 | 92609  | TIMM50   | -0.0219 | 0.9508 |
| 11052 | C02 | 1221  | 127700 | OSCP1    | -0.0219 | 0.9508 |
| 31021 | H06 | 12977 | 57404  | CYP20A1  | -0.0219 | 0.9508 |
| 11049 | B07 | 1850  | 51107  | APH1A    | -0.0219 | 0.9509 |
| 31007 | C10 | 11562 | 84809  | CROCCP2  | -0.0218 | 0.9509 |
| 51025 | A02 | 53258 | 6597   | SMARCA4  | -0.0218 | 0.9510 |
| 11080 | G08 | 2474  | 2073   | ERCC5    | -0.0218 | 0.9510 |
| 11062 | D07 | 1776  | 5522   | PPP2R2C  | -0.0218 | 0.9510 |
| 11062 | E12 | 4373  | 3232   | HOXD3    | -0.0218 | 0.9511 |
| 51026 | G10 | 56315 | 84131  | CEP78    | -0.0218 | 0.9511 |
| 31018 | D12 | 12995 | 10186  | LHFP     | -0.0218 | 0.9511 |
| 11009 | E07 | 6078  | 8131   | NPRL3    | -0.0217 | 0.9512 |
| 51022 | D11 | 56179 | 55677  | IWS1     | -0.0217 | 0.9512 |
| 51024 | E12 | 53242 | 9321   | TRIP11   | -0.0217 | 0.9512 |
| 11068 | E10 | 2230  | 8895   | CPNE3    | -0.0217 | 0.9512 |
| 11001 | B09 | 2842  | 404550 | C16orf74 | -0.0217 | 0.9513 |
| 11077 | G11 | 4529  | 2720   | GLB1     | -0.0216 | 0.9514 |
| 11044 | G03 | 4875  | 10654  | PMVK     | -0.0216 | 0.9515 |
| 11003 | F02 | 5683  | 64288  | ZNF323   | -0.0216 | 0.9515 |
| 11030 | H01 | 7470  | 83461  | CDCA3    | -0.0216 | 0.9515 |
| 31029 | F11 | 14197 | 84669  | USP32    | -0.0216 | 0.9515 |
| 11052 | D04 | 3796  | 55862  | ECHDC1   | -0.0216 | 0.9515 |
| 51020 | C01 | 55789 | 145873 | MESP2    | -0.0216 | 0.9515 |
| 31023 | B12 | 13769 | 54522  | ANKRD16  | -0.0215 | 0.9516 |
| 51032 | C05 | 55270 | 84897  | TBRG1    | -0.0215 | 0.9516 |
| 11032 | B08 | 9709  | 54463  | FAM134B  | -0.0215 | 0.9516 |
| 31041 | D08 | 5894  | 24144  | TFIP11   | -0.0215 | 0.9517 |
| 11001 | G04 | 657   | 6274   | S100A3   | -0.0215 | 0.9517 |
| 11056 | E11 | 2701  | 6431   | SRSF6    | -0.0215 | 0.9517 |
| 31016 | G04 | 12697 | 159013 | CXorf38  | -0.0215 | 0.9518 |
| 31023 | G10 | 13514 | 7477   | WNT7B    | -0.0215 | 0.9518 |
| 11077 | D06 | 4543  | 5777   | PTPN6    | -0.0214 | 0.9518 |
| 51006 | C11 | 54784 | 2646   | GCKR     | -0.0214 | 0.9519 |
| 11018 | B03 | 7714  | 56260  | C8orf44  | -0.0214 | 0.9519 |
| 51017 | G02 | 56725 | 58530  | LY6G6D   | -0.0214 | 0.9519 |
| 51030 | C11 | 55236 | 51588  | PIAS4    | -0.0214 | 0.9519 |

|       |     |       |        |          |         |        |
|-------|-----|-------|--------|----------|---------|--------|
| 51031 | B11 | 54007 | 85026  | C9orf37  | -0.0214 | 0.9520 |
| 51001 | G06 | 54696 | 353144 | LCE3C    | -0.0214 | 0.9520 |
| 11058 | B09 | 10047 | 64854  | USP46    | -0.0214 | 0.9520 |
| 51026 | D10 | 53219 | 287015 | TRIM42   | -0.0213 | 0.9521 |
| 51029 | H04 | 56237 | 85446  | ZFHX2    | -0.0213 | 0.9521 |
| 11057 | D02 | 8353  | 2277   | FIGF     | -0.0213 | 0.9521 |
| 51005 | B10 | 53657 | 50943  | FOXP3    | -0.0213 | 0.9522 |
| 31040 | D01 | 2281  | 132141 | IQCF1    | -0.0213 | 0.9522 |
| 31044 | G08 | 8467  | 5923   | RASGRF1  | -0.0213 | 0.9522 |
| 11004 | A03 | 949   | 54433  | GAR1     | -0.0213 | 0.9522 |
| 31024 | H06 | 13397 | 11284  | PNKP     | -0.0213 | 0.9522 |
| 31042 | H08 | 6272  | 2152   | F3       | -0.0212 | 0.9523 |
| 51012 | E09 | 54647 | 80342  | TRAF3IP3 | -0.0212 | 0.9523 |
| 11071 | D12 | 10070 | 79675  | FASTKD1  | -0.0212 | 0.9523 |
| 11062 | E09 | 4769  | 28981  | IFT81    | -0.0212 | 0.9523 |
| 11041 | F08 | 6344  | 11224  | RPL35    | -0.0212 | 0.9523 |
| 51008 | F07 | 53496 | 23090  | ZNF423   | -0.0212 | 0.9524 |
| 51021 | B07 | 55727 | 23180  | RFTN1    | -0.0212 | 0.9524 |
| 31040 | C10 | 10186 | 3310   | HSPA6    | -0.0211 | 0.9525 |
| 31027 | E11 | 14138 | 10142  | AKAP9    | -0.0211 | 0.9525 |
| 51001 | H07 | 56244 | 348645 | C22orf34 | -0.0211 | 0.9525 |
| 11016 | H09 | 6250  | 84914  | ZNF587   | -0.0211 | 0.9525 |
| 11006 | C05 | 5307  | 10101  | NUBP2    | -0.0211 | 0.9526 |
| 11079 | F04 | 2228  | 219681 | ARMC3    | -0.0211 | 0.9526 |
| 51003 | A04 | 54891 | 153770 | PLAC8L1  | -0.0211 | 0.9526 |
| 51026 | F05 | 55606 | 4839   | NOP2     | -0.0211 | 0.9526 |
| 11052 | B03 | 1634  | 93661  | CAPZA3   | -0.0211 | 0.9527 |
| 11018 | G02 | 3968  | 6139   | RPL17    | -0.0210 | 0.9527 |
| 31008 | F11 | 11621 | 219402 | MTIF3    | -0.0210 | 0.9527 |
| 11072 | E12 | 1493  | 55578  | FAM48A   | -0.0210 | 0.9528 |
| 31025 | E06 | 13471 | 64780  | MICAL1   | -0.0210 | 0.9528 |
| 11066 | H11 | 7424  | 79912  | PYROXD1  | -0.0210 | 0.9529 |
| 11010 | D09 | 260   | 23609  | MKRN2    | -0.0210 | 0.9529 |
| 11060 | B02 | 3774  | 7157   | TP53     | -0.0210 | 0.9529 |
| 11004 | D04 | 385   | 7079   | TIMP4    | -0.0210 | 0.9529 |
| 11069 | F09 | 6490  | 9063   | PIAS2    | -0.0209 | 0.9529 |
| 11054 | B09 | 554   | 26269  | FBXO8    | -0.0209 | 0.9529 |
| 31039 | F03 | 7766  | 4171   | MCM2     | -0.0209 | 0.9530 |
| 31043 | C06 | 7644  | 84936  | ZFYVE19  | -0.0209 | 0.9530 |
| 31002 | E02 | 10763 | 150165 | XKR3     | -0.0209 | 0.9530 |
| 11057 | A12 | 5993  | 25844  | YIPF3    | -0.0209 | 0.9530 |
| 31040 | B12 | 7544  | 81669  | CCNL2    | -0.0209 | 0.9530 |
| 31036 | B05 | 10859 | 80789  | INTS5    | -0.0208 | 0.9531 |
| 11001 | E07 | 9819  | 5348   | FXVD1    | -0.0208 | 0.9531 |

|       |     |       |        |           |         |        |
|-------|-----|-------|--------|-----------|---------|--------|
| 51004 | B08 | 53732 | 142684 | RAB40A    | -0.0208 | 0.9532 |
| 31037 | C12 | 14397 | 654346 | LGALS9C   | -0.0208 | 0.9532 |
| 11045 | E06 | 6867  | 10589  | DRAP1     | -0.0208 | 0.9533 |
| 11006 | C03 | 7257  | 54516  | MTRF1L    | -0.0207 | 0.9534 |
| 51011 | E01 | 53590 | 5588   | PRKCQ     | -0.0207 | 0.9534 |
| 31043 | G08 | 7872  | 3507   | IGHM      | -0.0207 | 0.9534 |
| 31004 | C08 | 11015 | 51142  | CHCHD2    | -0.0207 | 0.9535 |
| 51028 | C01 | 55294 | 11044  | PAPD7     | -0.0207 | 0.9535 |
| 51023 | F05 | 56261 | 2047   | EPHB1     | -0.0207 | 0.9536 |
| 11069 | E12 | 2161  | 4300   | MLLT3     | -0.0206 | 0.9536 |
| 51030 | F08 | 56440 | 83714  | NRIP2     | -0.0206 | 0.9536 |
| 31028 | G11 | 15056 | 146754 | DNAH2     | -0.0206 | 0.9536 |
| 11050 | A09 | 4158  | 5655   | KLK10     | -0.0206 | 0.9536 |
| 11063 | B02 | 2710  | 8795   | TNFRSF10B | -0.0206 | 0.9537 |
| 11017 | C12 | 7822  | 6206   | RPS12     | -0.0206 | 0.9537 |
| 11068 | D09 | 1585  | 166863 | RBM46     | -0.0206 | 0.9538 |
| 51015 | F03 | 52848 | 26548  | ITGB1BP2  | -0.0206 | 0.9538 |
| 11006 | H08 | 2670  | 3140   | MR1       | -0.0206 | 0.9538 |
| 31006 | A01 | 11111 | 220388 | CCDC89    | -0.0205 | 0.9538 |
| 11082 | F09 | 2607  | 197196 | TMEM148   | -0.0205 | 0.9538 |
| 51004 | A11 | 55031 | 401565 | FAM166A   | -0.0205 | 0.9538 |
| 11007 | B02 | 6577  | 54973  | CPSF3L    | -0.0205 | 0.9538 |
| 31039 | E02 | 9625  | 9500   | MAGED1    | -0.0205 | 0.9538 |
| 11018 | H09 | 6647  | 23279  | NUP160    | -0.0205 | 0.9539 |
| 11071 | A10 | 9707  | 81550  | TDRD3     | -0.0205 | 0.9539 |
| 11078 | G07 | 4910  | 271    | AMPD2     | -0.0205 | 0.9539 |
| 31016 | F10 | 12630 | 81544  | GDPD5     | -0.0205 | 0.9539 |
| 51005 | B08 | 56132 | 154743 | C7orf60   | -0.0205 | 0.9539 |
| 11088 | F04 | 8963  | 2118   | ETV4      | -0.0205 | 0.9540 |
| 11020 | B05 | 7527  | 6120   | RPE       | -0.0205 | 0.9540 |
| 11022 | H04 | 3320  | 91     | ACVR1B    | -0.0204 | 0.9540 |
| 31043 | B05 | 6574  | 91369  | ANKRD40   | -0.0204 | 0.9541 |
| 31001 | E10 | 10489 | 55286  | C4orf19   | -0.0204 | 0.9541 |
| 11083 | C02 | 2279  | 150142 | C21orf121 | -0.0204 | 0.9541 |
| 11058 | B10 | 10132 | 7044   | LEFTY2    | -0.0204 | 0.9541 |
| 11085 | F01 | 6473  | 826    | CAPNS1    | -0.0204 | 0.9541 |
| 31024 | F08 | 13579 | 54938  | SARS2     | -0.0204 | 0.9541 |
| 11088 | F07 | 292   | 3164   | NR4A1     | -0.0204 | 0.9542 |
| 11045 | G06 | 1705  | 114907 | FBXO32    | -0.0204 | 0.9542 |
| 31010 | F02 | 11352 | 56919  | DHX33     | -0.0203 | 0.9543 |
| 11056 | A05 | 1353  | 3135   | HLA-G     | -0.0203 | 0.9543 |
| 51022 | E08 | 56163 | 2068   | ERCC2     | -0.0203 | 0.9543 |
| 51031 | E06 | 55240 | NA     | NA        | -0.0203 | 0.9544 |
| 31041 | E02 | 6988  | 80758  | PRR7      | -0.0203 | 0.9544 |

|       |     |       |        |           |         |        |
|-------|-----|-------|--------|-----------|---------|--------|
| 11012 | C04 | 3071  | 221    | ALDH3B1   | -0.0203 | 0.9544 |
| 51028 | B11 | 53292 | 23705  | CADM1     | -0.0203 | 0.9544 |
| 11058 | G11 | 2509  | 54733  | SLC35F2   | -0.0202 | 0.9545 |
| 11002 | C08 | 10007 | 56986  | DTWD1     | -0.0202 | 0.9545 |
| 31022 | B10 | 13551 | 126003 | TRAPPC5   | -0.0202 | 0.9546 |
| 11013 | G03 | 6780  | 8623   | ASMTL     | -0.0202 | 0.9546 |
| 11037 | B06 | 6734  | 2313   | FLI1      | -0.0202 | 0.9546 |
| 11049 | C04 | 1085  | 11010  | GLIPR1    | -0.0202 | 0.9546 |
| 31045 | F04 | 7275  | 9843   | HEPH      | -0.0201 | 0.9547 |
| 11051 | D05 | 4585  | 3183   | HNRNPC    | -0.0201 | 0.9547 |
| 51008 | B09 | 55148 | 57514  | ARHGAP31  | -0.0201 | 0.9547 |
| 31009 | D09 | 11672 | 85438  | C4orf35   | -0.0201 | 0.9547 |
| 11050 | E10 | 4723  | 7168   | TPM1      | -0.0201 | 0.9548 |
| 11013 | A09 | 7617  | 90993  | CREB3L1   | -0.0201 | 0.9548 |
| 11008 | A03 | 5431  | 9533   | POLR1C    | -0.0201 | 0.9548 |
| 11085 | A09 | 78    | 79025  | C20orf195 | -0.0201 | 0.9548 |
| 51009 | H02 | 52855 | 56254  | RNF20     | -0.0201 | 0.9548 |
| 11005 | G04 | 3541  | 6132   | RPL8      | -0.0201 | 0.9549 |
| 11061 | G03 | 4044  | 408    | ARRB1     | -0.0201 | 0.9549 |
| 11016 | B11 | 9084  | 56033  | BARX1     | -0.0201 | 0.9549 |
| 11074 | F03 | 5562  | 10286  | BCAS2     | -0.0201 | 0.9549 |
| 11049 | A03 | 442   | 5682   | PSMA1     | -0.0200 | 0.9549 |
| 11067 | G06 | 643   | 25988  | HINFP     | -0.0200 | 0.9549 |
| 11085 | G03 | 5323  | 1876   | E2F6      | -0.0200 | 0.9550 |
| 11037 | G04 | 3696  | 2232   | FDXR      | -0.0200 | 0.9550 |
| 11027 | G11 | 6071  | 55861  | DBNDD2    | -0.0200 | 0.9550 |
| 11085 | F02 | 8009  | 7386   | UQCRFS1   | -0.0200 | 0.9550 |
| 11081 | D02 | 2514  | 554207 | LOC554207 | -0.0200 | 0.9551 |
| 51004 | E05 | 54445 | 113746 | ODF3      | -0.0200 | 0.9551 |
| 51012 | E11 | 54797 | 203611 | CDY2B     | -0.0200 | 0.9551 |
| 11077 | F07 | 861   | 3930   | LBR       | -0.0200 | 0.9551 |
| 11075 | E12 | 4907  | 11075  | STMN2     | -0.0199 | 0.9551 |
| 11029 | D10 | 6056  | 11014  | KDELR2    | -0.0199 | 0.9552 |
| 51033 | C09 | 53534 | 10814  | CPLX2     | -0.0199 | 0.9552 |
| 51027 | E07 | 56385 | 85366  | MYLK2     | -0.0199 | 0.9552 |
| 11071 | C09 | 9402  | 85360  | SYDE1     | -0.0199 | 0.9552 |
| 11074 | B01 | 1219  | 25876  | SPEF1     | -0.0199 | 0.9552 |
| 11009 | A03 | 755   | 92912  | UBE2Q2    | -0.0199 | 0.9552 |
| 11075 | F01 | 4745  | 10945  | KDELR1    | -0.0198 | 0.9553 |
| 11004 | H10 | 10077 | 84869  | CBR4      | -0.0198 | 0.9554 |
| 11025 | E08 | 10015 | 9020   | MAP3K14   | -0.0198 | 0.9555 |
| 11049 | C01 | 1699  | 221458 | KIF6      | -0.0198 | 0.9555 |
| 51012 | A04 | 54538 | 8537   | BCAS1     | -0.0197 | 0.9556 |
| 31041 | D12 | 4174  | 4689   | NCF4      | -0.0197 | 0.9556 |



|       |     |       |        |              |         |        |
|-------|-----|-------|--------|--------------|---------|--------|
| 11045 | E04 | 545   | 6193   | RPS5         | -0.0197 | 0.9556 |
| 11069 | F08 | 9873  | 10457  | GPNMB        | -0.0197 | 0.9557 |
| 31014 | B01 | 12067 | 2005   | ELK4         | -0.0197 | 0.9557 |
| 51010 | C10 | 52950 | 6801   | STRN         | -0.0197 | 0.9557 |
| 31017 | B02 | 12563 | 5001   | ORC5L        | -0.0197 | 0.9558 |
| 51028 | B09 | 55298 | 49856  | WDR8         | -0.0197 | 0.9558 |
| 51032 | G06 | 55405 | 374491 | LOC374491    | -0.0196 | 0.9558 |
| 51025 | A06 | 53252 | 116966 | WDR17        | -0.0196 | 0.9558 |
| 51027 | E11 | 56872 | 23500  | DAAM2        | -0.0196 | 0.9558 |
| 31045 | A03 | 392   | 1500   | CTNND1       | -0.0196 | 0.9559 |
| 31010 | E05 | 11675 | 83450  | LRRC48       | -0.0196 | 0.9559 |
| 11064 | D11 | 7198  | 6258   | RXRG         | -0.0196 | 0.9559 |
| 31003 | H09 | 10474 | 57569  | ARHGAP20     | -0.0196 | 0.9559 |
| 11016 | B09 | 6059  | 114926 | C8orf40      | -0.0196 | 0.9559 |
| 31007 | F08 | 11939 | 3667   | IRS1         | -0.0195 | 0.9561 |
| 11058 | G09 | 9955  | 2209   | FCGR1A       | -0.0195 | 0.9561 |
| 31027 | C10 | 14129 | 3781   | KCNN2        | -0.0195 | 0.9562 |
| 31003 | C05 | 10420 | 10580  | SORBS1       | -0.0194 | 0.9563 |
| 51033 | F10 | 55018 | 401135 | SYT14L       | -0.0194 | 0.9563 |
| 51005 | E08 | 56328 | 339324 | ZNF260       | -0.0194 | 0.9563 |
| 51006 | B01 | 54977 | 553158 | PRR5-ARHGAP8 | -0.0194 | 0.9564 |
| 11020 | C12 | 4997  | 56915  | EXOSC5       | -0.0194 | 0.9564 |
| 11012 | C02 | 4922  | 23099  | ZBTB43       | -0.0194 | 0.9564 |
| 51002 | C02 | 52617 | 8348   | HIST1H2BO    | -0.0194 | 0.9564 |
| 31027 | A03 | 13877 | 2838   | GPR15        | -0.0194 | 0.9564 |
| 51027 | G01 | 56837 | 5592   | PRKG1        | -0.0193 | 0.9564 |
| 51032 | C09 | 55415 | 57209  | ZNF248       | -0.0193 | 0.9564 |
| 11071 | H01 | 1559  | 54768  | HYDIN        | -0.0193 | 0.9565 |
| 11084 | B11 | 623   | 80346  | REEP4        | -0.0193 | 0.9565 |
| 51004 | G09 | 54898 | 79176  | FBXL15       | -0.0193 | 0.9566 |
| 11009 | D09 | 739   | 84649  | DGAT2        | -0.0193 | 0.9566 |
| 31008 | B11 | 11418 | 58191  | CXCL16       | -0.0193 | 0.9566 |
| 31029 | F07 | 14350 | 55586  | MIOX         | -0.0193 | 0.9566 |
| 31007 | C09 | 11515 | 1672   | DEFB1        | -0.0193 | 0.9566 |
| 11049 | A02 | 2899  | 113791 | PIK3IP1      | -0.0192 | 0.9567 |
| 11085 | C11 | 7130  | 65080  | MRPL44       | -0.0192 | 0.9567 |
| 51025 | A11 | 56862 | 9814   | SFI1         | -0.0192 | 0.9567 |
| 11008 | G05 | 234   | 286075 | ZNF707       | -0.0192 | 0.9567 |
| 11061 | B10 | 3819  | 10623  | POLR3C       | -0.0192 | 0.9568 |
| 51006 | H09 | 53976 | 26974  | ZNF285       | -0.0192 | 0.9568 |
| 11012 | B11 | 7749  | 11027  | LILRA2       | -0.0192 | 0.9568 |
| 51005 | D03 | 54246 | 2843   | GPR20        | -0.0192 | 0.9568 |
| 11086 | A12 | 7228  | 85302  | FBF1         | -0.0192 | 0.9568 |
| 11035 | A08 | 5095  | 1848   | DUSP6        | -0.0192 | 0.9568 |

|       |     |       |        |           |         |        |
|-------|-----|-------|--------|-----------|---------|--------|
| 11088 | G03 | 5435  | 80178  | C16orf59  | -0.0192 | 0.9568 |
| 31036 | A08 | 11735 | 51160  | VPS28     | -0.0192 | 0.9569 |
| 51004 | H07 | 53294 | 339524 | LOC339524 | -0.0191 | 0.9569 |
| 31007 | A02 | 11204 | 9753   | ZSCAN12   | -0.0191 | 0.9570 |
| 51025 | B12 | 56838 | 80012  | PHC3      | -0.0191 | 0.9570 |
| 31040 | D11 | 5253  | 54913  | RPP25     | -0.0191 | 0.9570 |
| 11028 | C09 | 4695  | 23583  | SMUG1     | -0.0190 | 0.9571 |
| 11028 | B03 | 3119  | 7555   | CNBP      | -0.0190 | 0.9571 |
| 51009 | F09 | 54407 | 1938   | EEF2      | -0.0190 | 0.9571 |
| 11088 | B09 | 475   | 4007   | PRICKLE3  | -0.0190 | 0.9571 |
| 31034 | B05 | 14979 | 84289  | ING5      | -0.0190 | 0.9571 |
| 11063 | F02 | 4783  | 54540  | FAM193B   | -0.0190 | 0.9572 |
| 51035 | E04 | 54368 | 2830   | GPR6      | -0.0190 | 0.9572 |
| 11082 | E05 | 6346  | 8365   | HIST1H4H  | -0.0190 | 0.9572 |
| 31044 | D04 | 4965  | 4919   | ROR1      | -0.0190 | 0.9572 |
| 11086 | A11 | 6373  | 55180  | LINS1     | -0.0190 | 0.9573 |
| 31037 | F10 | 14249 | 146664 | MGAT5B    | -0.0189 | 0.9574 |
| 31008 | A06 | 11342 | 92086  | GGTLC1    | -0.0189 | 0.9574 |
| 11078 | G01 | 6156  | 23339  | VPS39     | -0.0189 | 0.9574 |
| 11035 | H08 | 8718  | 26009  | ZZZ3      | -0.0189 | 0.9574 |
| 11086 | B09 | 3718  | 2222   | FDFT1     | -0.0189 | 0.9575 |
| 11020 | G11 | 5254  | 3028   | HSD17B10  | -0.0189 | 0.9575 |
| 51006 | B03 | 54911 | 79872  | CBLL1     | -0.0189 | 0.9575 |
| 11049 | D10 | 3847  | 8209   | C21orf33  | -0.0189 | 0.9575 |
| 31003 | A12 | 10479 | 84128  | WDR75     | -0.0189 | 0.9575 |
| 51032 | F02 | 56306 | 283551 | C14orf182 | -0.0189 | 0.9575 |
| 31015 | E10 | 12636 | 28815  | IGLV2-14  | -0.0188 | 0.9575 |
| 11050 | B04 | 1050  | 836    | CASP3     | -0.0188 | 0.9575 |
| 31010 | B05 | 11746 | 23636  | NUP62     | -0.0188 | 0.9576 |
| 11013 | B07 | 5296  | 83985  | SPNS1     | -0.0188 | 0.9576 |
| 31001 | A06 | 10297 | 51334  | PRR16     | -0.0188 | 0.9577 |
| 31027 | H09 | 14086 | 9541   | CIR1      | -0.0188 | 0.9577 |
| 31011 | A11 | 11906 | 374868 | ATP9B     | -0.0188 | 0.9577 |
| 11015 | B11 | 5392  | 84850  | C9orf70   | -0.0187 | 0.9578 |
| 11018 | C11 | 3755  | 51645  | PPIL1     | -0.0187 | 0.9578 |
| 51025 | C09 | 55384 | 9990   | SLC12A6   | -0.0187 | 0.9578 |
| 31035 | G02 | 14862 | 2801   | GOLGA2    | -0.0187 | 0.9578 |
| 11048 | F07 | 5646  | 8813   | DPM1      | -0.0187 | 0.9579 |
| 11086 | C05 | 6410  | 58     | ACTA1     | -0.0187 | 0.9580 |
| 51012 | D11 | 53966 | 11044  | PAPD7     | -0.0187 | 0.9580 |
| 31002 | E12 | 10463 | 7554   | ZNF8      | -0.0186 | 0.9580 |
| 11074 | C02 | 3860  | 6204   | RPS10     | -0.0186 | 0.9580 |
| 51034 | A05 | 53708 | 266553 | OFCC1     | -0.0186 | 0.9580 |
| 11047 | C04 | 6389  | 51250  | C6orf203  | -0.0186 | 0.9581 |

|       |     |       |           |           |         |        |
|-------|-----|-------|-----------|-----------|---------|--------|
| 31045 | C05 | 9562  | 286527    | TMSB15B   | -0.0186 | 0.9581 |
| 11057 | A05 | 4888  | 7476      | WNT7A     | -0.0186 | 0.9581 |
| 11028 | A08 | 9472  | 29851     | ICOS      | -0.0186 | 0.9581 |
| 11088 | D08 | 838   | 8493      | PPM1D     | -0.0186 | 0.9582 |
| 11051 | C03 | 6340  | 112611    | RWDD2A    | -0.0186 | 0.9582 |
| 11078 | G11 | 1331  | 57678     | GPAM      | -0.0186 | 0.9582 |
| 31006 | C06 | 11287 | 9938      | ARHGAP25  | -0.0185 | 0.9582 |
| 11062 | E06 | 10058 | 8428      | STK24     | -0.0185 | 0.9583 |
| 31022 | B11 | 13390 | 286257    | C9orf142  | -0.0185 | 0.9583 |
| 11014 | F11 | 850   | 3688      | ITGB1     | -0.0185 | 0.9584 |
| 11051 | G05 | 6339  | 27284     | SULT1B1   | -0.0185 | 0.9584 |
| 31005 | G10 | 11007 | 126823    | KLHDC9    | -0.0184 | 0.9585 |
| 31041 | F10 | 5123  | 54460     | MRPS21    | -0.0184 | 0.9585 |
| 31008 | A12 | 11438 | 340348    | TSPAN33   | -0.0184 | 0.9585 |
| 51035 | E10 | 54571 | 57093     | TRIM49    | -0.0184 | 0.9585 |
| 31040 | B10 | 8415  | 221914    | GPC2      | -0.0184 | 0.9586 |
| 31044 | D06 | 3941  | 54869     | EPS8L1    | -0.0184 | 0.9586 |
| 11081 | E11 | 8920  | 100133941 | CD24      | -0.0183 | 0.9588 |
| 11054 | E11 | 5231  | 3927      | LASP1     | -0.0183 | 0.9588 |
| 11053 | C07 | 8038  | 2213      | FCGR2B    | -0.0183 | 0.9588 |
| 31041 | E05 | 5192  | 29763     | PACSIN3   | -0.0183 | 0.9588 |
| 11071 | G08 | 9843  | 11131     | CAPN11    | -0.0183 | 0.9588 |
| 11056 | C02 | 2749  | 59345     | GNB4      | -0.0182 | 0.9589 |
| 31030 | E08 | 14459 | 83448     | PUS7L     | -0.0182 | 0.9589 |
| 51023 | C05 | 55899 | 8481      | OFD1      | -0.0182 | 0.9589 |
| 51031 | B01 | 55462 | 114899    | C1QTNF3   | -0.0182 | 0.9589 |
| 51009 | F02 | 52690 | 7223      | TRPC4     | -0.0182 | 0.9589 |
| 11025 | H09 | 4778  | 3678      | ITGA5     | -0.0182 | 0.9590 |
| 51001 | H10 | 52924 | 128826    | C20orf166 | -0.0182 | 0.9590 |
| 31037 | C03 | 12437 | 23338     | PHF15     | -0.0182 | 0.9590 |
| 11036 | G09 | 6865  | 56649     | TMPRSS4   | -0.0182 | 0.9591 |
| 11004 | F01 | 568   | 55905     | RNF114    | -0.0181 | 0.9591 |
| 51008 | F03 | 54248 | 152485    | ZNF827    | -0.0181 | 0.9591 |
| 11074 | D02 | 4354  | 84285     | EIF1AD    | -0.0181 | 0.9591 |
| 31037 | H10 | 14125 | 83851     | SYT16     | -0.0181 | 0.9592 |
| 51002 | F09 | 52582 | 26083     | TBC1D29   | -0.0181 | 0.9592 |
| 51008 | E05 | 54110 | 5139      | PDE3A     | -0.0181 | 0.9592 |
| 51032 | B04 | 56095 | 55592     | GOLGA2B   | -0.0180 | 0.9593 |
| 11032 | D02 | 1485  | 2100      | ESR2      | -0.0180 | 0.9594 |
| 51025 | H07 | 53247 | 55035     | NOL8      | -0.0180 | 0.9594 |
| 31018 | F06 | 12970 | 11017     | SNRNP27   | -0.0180 | 0.9595 |
| 51026 | G03 | 55293 | 64132     | XYLT2     | -0.0180 | 0.9595 |
| 51020 | H04 | 56017 | 256987    | SERINC5   | -0.0179 | 0.9595 |
| 51001 | A04 | 52574 | 140596    | DEFB104A  | -0.0179 | 0.9596 |

|       |     |       |        |           |         |        |
|-------|-----|-------|--------|-----------|---------|--------|
| 31019 | C03 | 13215 | 196074 | METT5D1   | -0.0179 | 0.9597 |
| 11060 | F09 | 1390  | 51704  | GPRC5B    | -0.0179 | 0.9597 |
| 11078 | H02 | 803   | 3428   | IFI16     | -0.0178 | 0.9598 |
| 51032 | F04 | 55433 | 149950 | LOC149950 | -0.0178 | 0.9599 |
| 11062 | H08 | 5806  | 10618  | TGOLN2    | -0.0177 | 0.9600 |
| 11008 | F11 | 3613  | 3105   | HLA-A     | -0.0177 | 0.9600 |
| 51014 | F08 | 52698 | 79861  | TUBAL3    | -0.0177 | 0.9600 |
| 11083 | G08 | 3073  | 5920   | RARRES3   | -0.0177 | 0.9600 |
| 11004 | C10 | 8995  | 79894  | ZNF672    | -0.0177 | 0.9600 |
| 11088 | D04 | 5708  | 25928  | SOSTDC1   | -0.0177 | 0.9601 |
| 11075 | B04 | 2280  | 403312 | MGC39545  | -0.0177 | 0.9601 |
| 11038 | B06 | 3665  | 51654  | CDK5RAP1  | -0.0177 | 0.9601 |
| 11085 | E11 | 9677  | 375484 | C5orf25   | -0.0177 | 0.9601 |
| 11030 | E07 | 3210  | 55277  | FGGY      | -0.0177 | 0.9602 |
| 11041 | F10 | 5184  | 84817  | TXNDC17   | -0.0176 | 0.9602 |
| 11004 | E11 | 589   | 928    | CD9       | -0.0176 | 0.9602 |
| 11084 | H09 | 3650  | 54478  | FAM64A    | -0.0176 | 0.9602 |
| 31040 | C02 | 2038  | 199720 | GGN       | -0.0176 | 0.9603 |
| 11052 | G01 | 3193  | 27239  | GPR162    | -0.0176 | 0.9603 |
| 11035 | B01 | 2590  | 5866   | RAB3IL1   | -0.0176 | 0.9603 |
| 11080 | D12 | 10108 | 9372   | ZFYVE9    | -0.0176 | 0.9603 |
| 51002 | E08 | 55054 | 643210 | FLJ40292  | -0.0176 | 0.9604 |
| 11032 | E12 | 1038  | 51422  | PRKAG2    | -0.0175 | 0.9604 |
| 31002 | C09 | 10260 | 23532  | PRAME     | -0.0175 | 0.9604 |
| 11042 | A07 | 8678  | 541473 | LOC541473 | -0.0175 | 0.9606 |
| 11007 | A10 | 8494  | 283971 | CLEC18C   | -0.0175 | 0.9606 |
| 51018 | E08 | 56717 | 386681 | KRTAP10-8 | -0.0174 | 0.9606 |
| 11089 | B05 | 275   | 55262  | C7orf43   | -0.0174 | 0.9607 |
| 31002 | G11 | 10422 | 7786   | MAP3K12   | -0.0174 | 0.9607 |
| 11075 | C07 | 1908  | 199746 | U2AF1L4   | -0.0174 | 0.9607 |
| 51013 | B10 | 54726 | 25794  | FSCN2     | -0.0174 | 0.9607 |
| 51011 | B02 | 53937 | 85406  | DNAJC14   | -0.0174 | 0.9608 |
| 11012 | C07 | 6871  | 25813  | SAMM50    | -0.0173 | 0.9610 |
| 11001 | D02 | 241   | 11157  | LSM6      | -0.0173 | 0.9610 |
| 11026 | H11 | 9355  | 285203 | C3orf64   | -0.0173 | 0.9610 |
| 11019 | G10 | 7585  | 8601   | RGS20     | -0.0173 | 0.9610 |
| 31015 | A03 | 12406 | 28956  | ROBLD3    | -0.0172 | 0.9611 |
| 11088 | H06 | 1024  | 8697   | CDC23     | -0.0172 | 0.9611 |
| 11048 | B10 | 1200  | 5173   | PDYN      | -0.0172 | 0.9611 |
| 51004 | H01 | 53940 | 54742  | LY6K      | -0.0172 | 0.9611 |
| 11052 | C07 | 2757  | 54962  | TIPIN     | -0.0172 | 0.9611 |
| 11044 | G09 | 730   | 3241   | HPCAL1    | -0.0172 | 0.9612 |
| 11058 | D03 | 9329  | 2833   | CXCR3     | -0.0172 | 0.9612 |
| 11062 | G06 | 5141  | 83931  | STK40     | -0.0172 | 0.9612 |

|       |     |       |        |           |         |        |
|-------|-----|-------|--------|-----------|---------|--------|
| 11064 | E09 | 2522  | 10475  | TRIM38    | -0.0172 | 0.9612 |
| 11011 | D06 | 5250  | 7866   | IFRD2     | -0.0172 | 0.9612 |
| 11036 | G07 | 9313  | 946    | SIGLEC6   | -0.0172 | 0.9613 |
| 11026 | B02 | 2330  | 394261 | C2orf19   | -0.0172 | 0.9613 |
| 31005 | D03 | 10811 | 284348 | LYPD5     | -0.0172 | 0.9613 |
| 11017 | B10 | 6417  | 4712   | NDUFB6    | -0.0171 | 0.9613 |
| 51029 | H07 | 56857 | 54855  | FAM46C    | -0.0171 | 0.9613 |
| 51003 | F09 | 55094 | 400707 | LOC400707 | -0.0171 | 0.9613 |
| 11058 | B07 | 8074  | 81569  | ACTL8     | -0.0171 | 0.9613 |
| 31033 | E05 | 14759 | 10160  | FARP1     | -0.0171 | 0.9614 |
| 11027 | A11 | 2255  | 55275  | VPS53     | -0.0171 | 0.9614 |
| 31040 | F11 | 7712  | 84264  | HAGHL     | -0.0171 | 0.9614 |
| 11087 | B09 | 4791  | 23616  | SH3BP1    | -0.0171 | 0.9614 |
| 31010 | C04 | 11372 | 5611   | DNAJC3    | -0.0171 | 0.9615 |
| 51009 | F06 | 54921 | 2914   | GRM4      | -0.0171 | 0.9615 |
| 51029 | E01 | 56371 | 9495   | AKAP5     | -0.0171 | 0.9615 |
| 11057 | F01 | 5854  | 6652   | SORD      | -0.0170 | 0.9616 |
| 11017 | B02 | 7725  | 114899 | C1QTNF3   | -0.0170 | 0.9617 |
| 11030 | E04 | 5378  | 54948  | MRPL16    | -0.0170 | 0.9617 |
| 51015 | E11 | 52955 | 4956   | ODF1      | -0.0169 | 0.9617 |
| 51030 | D06 | 55548 | 399474 | TMEM200B  | -0.0169 | 0.9617 |
| 51029 | F09 | 56849 | 57708  | MIER1     | -0.0169 | 0.9619 |
| 11041 | A10 | 4996  | 3159   | HMGA1     | -0.0169 | 0.9619 |
| 11060 | B12 | 7734  | 10240  | MRPS31    | -0.0168 | 0.9620 |
| 51009 | G04 | 55008 | 3698   | ITIH2     | -0.0168 | 0.9620 |
| 11063 | E09 | 8653  | 1911   | PHC1      | -0.0168 | 0.9620 |
| 51006 | H07 | 55447 | 25900  | IFFO1     | -0.0168 | 0.9620 |
| 31007 | F01 | 11161 | 10288  | LILRB2    | -0.0168 | 0.9620 |
| 11046 | F07 | 2022  | 151188 | ARL6IP6   | -0.0168 | 0.9621 |
| 11008 | H05 | 7555  | 55742  | PARVA     | -0.0168 | 0.9621 |
| 11039 | E12 | 1525  | 56261  | GPCPD1    | -0.0167 | 0.9622 |
| 11040 | B10 | 9143  | 9403   | SEP15     | -0.0167 | 0.9622 |
| 11062 | C08 | 4808  | 6124   | RPL4      | -0.0167 | 0.9622 |
| 11054 | D01 | 6554  | 90506  | LRRC46    | -0.0167 | 0.9623 |
| 11018 | D04 | 7028  | 23479  | ISCU      | -0.0167 | 0.9623 |
| 51024 | D02 | 56090 | 9462   | RASAL2    | -0.0167 | 0.9623 |
| 11061 | H10 | 4654  | 79020  | C7orf25   | -0.0167 | 0.9624 |
| 31001 | F02 | 10271 | 56063  | C1orf91   | -0.0167 | 0.9624 |
| 11089 | A05 | 765   | 221302 | ZUFSP     | -0.0167 | 0.9624 |
| 11076 | H02 | 3889  | 55748  | CNDP2     | -0.0166 | 0.9624 |
| 11089 | D01 | 525   | 58500  | ZNF250    | -0.0166 | 0.9624 |
| 51001 | G03 | 52652 | 84520  | C14orf142 | -0.0166 | 0.9624 |
| 11072 | B05 | 2346  | 57700  | FAM160B1  | -0.0166 | 0.9624 |
| 11055 | F07 | 9033  | NA     | NA        | -0.0166 | 0.9625 |

|       |     |       |        |          |         |        |
|-------|-----|-------|--------|----------|---------|--------|
| 31038 | F11 | 9791  | 56652  | C10orf2  | -0.0166 | 0.9625 |
| 11049 | G06 | 5303  | 92369  | SPSB4    | -0.0166 | 0.9625 |
| 11049 | D07 | 5516  | 4291   | MLF1     | -0.0166 | 0.9625 |
| 51014 | B05 | 52988 | 1591   | CYP24A1  | -0.0166 | 0.9625 |
| 31012 | D04 | 12125 | 159091 | FAM122C  | -0.0166 | 0.9625 |
| 11034 | E11 | 1177  | 79608  | RIC3     | -0.0166 | 0.9626 |
| 31038 | C12 | 3500  | 5709   | PSMD3    | -0.0166 | 0.9626 |
| 11073 | F01 | 8877  | 56894  | AGPAT3   | -0.0165 | 0.9627 |
| 11089 | C03 | 1739  | 657    | BMPRI1A  | -0.0165 | 0.9627 |
| 11029 | B04 | 2047  | 55723  | ASF1B    | -0.0165 | 0.9627 |
| 31033 | H01 | 14698 | 5191   | PEX7     | -0.0165 | 0.9628 |
| 11056 | F08 | 4795  | 2766   | GMPR     | -0.0165 | 0.9628 |
| 11060 | A03 | 2633  | 5883   | RAD9A    | -0.0165 | 0.9628 |
| 11088 | A01 | 6357  | 4057   | LTF      | -0.0164 | 0.9628 |
| 31025 | B08 | 14051 | 259240 | WFDC9    | -0.0164 | 0.9628 |
| 11036 | D08 | 6926  | 9467   | SH3BP5   | -0.0164 | 0.9629 |
| 51023 | G10 | 55907 | 84433  | CARD11   | -0.0164 | 0.9629 |
| 51012 | A12 | 54725 | 153642 | ARSK     | -0.0164 | 0.9629 |
| 11063 | F06 | 8701  | 3075   | CFH      | -0.0164 | 0.9630 |
| 11074 | E05 | 1654  | 90634  | N4BP2L1  | -0.0164 | 0.9630 |
| 11003 | G09 | 5793  | 932    | MS4A3    | -0.0164 | 0.9630 |
| 11061 | F11 | 9744  | 51466  | EVL      | -0.0164 | 0.9630 |
| 51024 | G06 | 55176 | 25929  | GEMIN5   | -0.0163 | 0.9631 |
| 51023 | H10 | 55902 | 23414  | ZFPM2    | -0.0162 | 0.9633 |
| 51006 | F08 | 54528 | 79654  | HECTD3   | -0.0162 | 0.9634 |
| 31031 | A09 | 14595 | 2832   | NPBWR2   | -0.0162 | 0.9634 |
| 11079 | D05 | 2145  | 22911  | WDR47    | -0.0162 | 0.9634 |
| 31041 | D04 | 7686  | 1045   | CDX2     | -0.0162 | 0.9634 |
| 51009 | B01 | 53071 | 9354   | UBE4A    | -0.0162 | 0.9634 |
| 51003 | G10 | 14035 | 2254   | FGF9     | -0.0162 | 0.9634 |
| 11064 | C04 | 1244  | 51164  | DCTN4    | -0.0162 | 0.9635 |
| 31005 | D05 | 11309 | 282679 | AQP11    | -0.0161 | 0.9635 |
| 31006 | C10 | 11249 | 2326   | FMO1     | -0.0161 | 0.9635 |
| 51016 | H10 | 56657 | 534    | ATP6V1G2 | -0.0161 | 0.9636 |
| 11026 | C04 | 7451  | 9978   | RBX1     | -0.0161 | 0.9636 |
| 11066 | C08 | 6711  | 54487  | DGCR8    | -0.0161 | 0.9636 |
| 11038 | D01 | 5981  | 3297   | HSF1     | -0.0161 | 0.9636 |
| 11002 | F07 | 8253  | 323    | APBB2    | -0.0161 | 0.9637 |
| 31007 | F03 | 10928 | 10905  | MAN1A2   | -0.0160 | 0.9637 |
| 31010 | B02 | 11753 | 51426  | POLK     | -0.0160 | 0.9637 |
| 51031 | A05 | 56502 | 2678   | GGT1     | -0.0160 | 0.9638 |
| 11071 | E02 | 833   | 6574   | SLC20A1  | -0.0160 | 0.9639 |
| 31004 | D10 | 11179 | 23200  | ATP11B   | -0.0159 | 0.9639 |
| 11078 | H01 | 6892  | 2132   | EXT2     | -0.0159 | 0.9640 |

|       |     |       |        |            |         |        |
|-------|-----|-------|--------|------------|---------|--------|
| 31034 | C04 | 14867 | 344892 | RTP2       | -0.0159 | 0.9640 |
| 51021 | F02 | 56404 | 84448  | ABLIM2     | -0.0159 | 0.9640 |
| 11060 | E04 | 2286  | 65062  | ALS2CR4    | -0.0159 | 0.9640 |
| 31039 | B12 | 3393  | 26015  | RPAP1      | -0.0159 | 0.9640 |
| 51013 | D07 | 54815 | 63951  | DMRTA1     | -0.0159 | 0.9641 |
| 11038 | C10 | 3460  | 7464   | CORO2A     | -0.0159 | 0.9641 |
| 11060 | D11 | 1666  | 9265   | CYTH3      | -0.0159 | 0.9641 |
| 11085 | E08 | 3599  | 23017  | FAIM2      | -0.0159 | 0.9641 |
| 11057 | H05 | 514   | 81926  | FAM108A1   | -0.0158 | 0.9642 |
| 11049 | G05 | 8628  | 50717  | DCAF8      | -0.0158 | 0.9642 |
| 31034 | B04 | 14860 | 90480  | GADD45GIP1 | -0.0158 | 0.9642 |
| 31001 | D03 | 10793 | 201799 | TMEM154    | -0.0158 | 0.9642 |
| 11070 | H07 | 7045  | 10318  | TNIP1      | -0.0158 | 0.9642 |
| 11078 | D11 | 7279  | 11218  | DDX20      | -0.0158 | 0.9643 |
| 51035 | C09 | 54782 | 957    | ENTPD5     | -0.0158 | 0.9643 |
| 11005 | E02 | 443   | 64946  | CENPH      | -0.0158 | 0.9643 |
| 11083 | C11 | 8241  | 79969  | C6orf134   | -0.0157 | 0.9644 |
| 11024 | F04 | 8276  | 1811   | SLC26A3    | -0.0157 | 0.9644 |
| 31036 | A11 | 12993 | 55423  | SIRPG      | -0.0157 | 0.9645 |
| 11056 | G08 | 4265  | 3726   | JUNB       | -0.0157 | 0.9645 |
| 11028 | F01 | 1179  | 80177  | MYCT1      | -0.0157 | 0.9645 |
| 11010 | D07 | 523   | 56923  | NMUR2      | -0.0157 | 0.9646 |
| 11007 | G03 | 6737  | 4240   | MFGE8      | -0.0157 | 0.9646 |
| 11014 | A12 | 834   | 4034   | LRCH4      | -0.0157 | 0.9646 |
| 31031 | H10 | 14552 | 64170  | CARD9      | -0.0156 | 0.9646 |
| 11002 | C11 | 10182 | 374768 | SPEM1      | -0.0156 | 0.9646 |
| 11057 | E02 | 2028  | 55213  | RCBTB1     | -0.0156 | 0.9647 |
| 11046 | A08 | 1698  | 2339   | FNTA       | -0.0156 | 0.9647 |
| 11067 | D06 | 3057  | 80153  | EDC3       | -0.0156 | 0.9647 |
| 11036 | D02 | 7460  | 55147  | RBM23      | -0.0156 | 0.9647 |
| 31002 | H10 | 10705 | 7525   | YES1       | -0.0156 | 0.9647 |
| 11084 | F04 | 6411  | 29082  | CHMP4A     | -0.0156 | 0.9647 |
| 11088 | C10 | 1045  | 7706   | TRIM25     | -0.0156 | 0.9647 |
| 11016 | D04 | 5563  | 4256   | MGP        | -0.0156 | 0.9647 |
| 11018 | A01 | 6325  | 29095  | ORMDL2     | -0.0156 | 0.9647 |
| 31027 | F10 | 15038 | 10462  | CLEC10A    | -0.0156 | 0.9648 |
| 31013 | C07 | 12090 | 5724   | PTAFR      | -0.0156 | 0.9648 |
| 51034 | B04 | 54003 | 347517 | RAB41      | -0.0156 | 0.9648 |
| 11036 | D10 | 1262  | 1909   | EDNRA      | -0.0156 | 0.9648 |
| 11022 | D06 | 7839  | 11047  | ADRM1      | -0.0156 | 0.9648 |
| 51006 | H10 | 56387 | 9131   | AIFM1      | -0.0155 | 0.9649 |
| 11066 | F08 | 9039  | 9203   | ZMYM3      | -0.0155 | 0.9649 |
| 51032 | H04 | 53174 | 11042  | SMA5       | -0.0155 | 0.9649 |
| 11080 | D03 | 5834  | 3693   | ITGB5      | -0.0155 | 0.9649 |

|       |     |       |        |           |         |        |
|-------|-----|-------|--------|-----------|---------|--------|
| 11045 | F01 | 3052  | 64976  | MRPL40    | -0.0155 | 0.9649 |
| 11042 | B05 | 5627  | 2167   | FABP4     | -0.0155 | 0.9650 |
| 11040 | C11 | 1114  | 2786   | GNG4      | -0.0155 | 0.9650 |
| 51006 | B10 | 54560 | 9389   | SLC22A14  | -0.0155 | 0.9650 |
| 11019 | H02 | 8010  | 2885   | GRB2      | -0.0155 | 0.9650 |
| 11073 | H10 | 1116  | 221044 | UCMA      | -0.0154 | 0.9651 |
| 11081 | D03 | 9168  | 8895   | CPNE3     | -0.0154 | 0.9652 |
| 11074 | D07 | 4196  | 22818  | COPZ1     | -0.0154 | 0.9652 |
| 31036 | B09 | 11492 | 113189 | CHST14    | -0.0154 | 0.9652 |
| 31032 | C09 | 14783 | 4308   | TRPM1     | -0.0154 | 0.9652 |
| 31012 | B05 | 11970 | 10633  | RASL10A   | -0.0154 | 0.9652 |
| 11068 | H03 | 480   | 55773  | TBC1D23   | -0.0154 | 0.9653 |
| 11055 | C07 | 1174  | 9796   | PHYHIP    | -0.0153 | 0.9653 |
| 11049 | A06 | 2400  | 55907  | CMAS      | -0.0153 | 0.9653 |
| 11079 | H10 | 4540  | 3683   | ITGAL     | -0.0153 | 0.9654 |
| 11002 | F01 | 8362  | 1482   | NKX2-5    | -0.0153 | 0.9654 |
| 51020 | B02 | 56795 | 9066   | SYT7      | -0.0153 | 0.9654 |
| 11088 | A11 | 749   | 726    | CAPN5     | -0.0153 | 0.9655 |
| 11061 | A02 | 3806  | 26135  | SERBP1    | -0.0153 | 0.9655 |
| 51032 | C10 | 55381 | 29797  | POM121L8P | -0.0152 | 0.9655 |
| 51006 | E04 | 53699 | 203062 | TSNARE1   | -0.0152 | 0.9655 |
| 11021 | B12 | 5501  | 3126   | HLA-DRB4  | -0.0152 | 0.9655 |
| 31042 | A02 | 4861  | 30844  | EHD4      | -0.0152 | 0.9656 |
| 11040 | G10 | 8048  | 6278   | S100A7    | -0.0152 | 0.9656 |
| 11015 | F07 | 5258  | 339500 | ZNF678    | -0.0152 | 0.9656 |
| 11041 | F09 | 2160  | 56158  | TEX12     | -0.0152 | 0.9656 |
| 11006 | B12 | 2665  | 2707   | GJB3      | -0.0152 | 0.9656 |
| 11026 | G11 | 8315  | 6981   | TRGV7     | -0.0152 | 0.9657 |
| 11002 | F11 | 10094 | 93973  | ACTR8     | -0.0152 | 0.9657 |
| 11006 | A04 | 9244  | 122786 | FRMD6     | -0.0152 | 0.9657 |
| 51009 | C02 | 52852 | 10529  | NEBL      | -0.0152 | 0.9657 |
| 31020 | C10 | 12992 | 2532   | DARC      | -0.0152 | 0.9657 |
| 31042 | B11 | 5071  | 10078  | TSSC4     | -0.0151 | 0.9657 |
| 11086 | C09 | 7796  | 3916   | LAMP1     | -0.0151 | 0.9658 |
| 51017 | A10 | 56517 | 92070  | C4orf42   | -0.0151 | 0.9658 |
| 11046 | D09 | 1947  | 84513  | PPAPDC1B  | -0.0151 | 0.9658 |
| 51006 | E02 | 56150 | 149628 | PYHIN1    | -0.0151 | 0.9659 |
| 31008 | C09 | 11641 | 55751  | TMEM184C  | -0.0151 | 0.9659 |
| 51002 | H02 | 55092 | 400997 | FLJ44006  | -0.0151 | 0.9659 |
| 11030 | B03 | 6090  | 79038  | ZFYVE21   | -0.0151 | 0.9659 |
| 11025 | B10 | 8381  | 11259  | FILIP1L   | -0.0150 | 0.9660 |
| 31041 | E12 | 3780  | 23648  | SSBP3     | -0.0150 | 0.9660 |
| 31006 | F08 | 10938 | 54813  | KLHL28    | -0.0150 | 0.9660 |
| 31040 | C07 | 10165 | 1414   | CRYBB1    | -0.0150 | 0.9660 |



|       |     |       |        |           |         |        |
|-------|-----|-------|--------|-----------|---------|--------|
| 11051 | A02 | 6917  | 115708 | TRMT61A   | -0.0150 | 0.9660 |
| 11041 | H11 | 880   | 8969   | HIST1H2AG | -0.0150 | 0.9660 |
| 51017 | D09 | 56378 | 27190  | IL17B     | -0.0150 | 0.9660 |
| 11039 | E02 | 1468  | 8653   | DDX3Y     | -0.0150 | 0.9661 |
| 11056 | E05 | 526   | 92667  | C20orf72  | -0.0150 | 0.9661 |
| 11017 | H11 | 3982  | 4118   | MAL       | -0.0149 | 0.9662 |
| 11006 | F02 | 5418  | 1468   | SLC25A10  | -0.0149 | 0.9662 |
| 11074 | A08 | 2194  | 200523 | C2orf51   | -0.0149 | 0.9662 |
| 11022 | D01 | 7380  | 23063  | WAPAL     | -0.0149 | 0.9662 |
| 51003 | G08 | 52612 | 10143  | CLEC3A    | -0.0149 | 0.9662 |
| 51018 | E09 | 55992 | 11249  | NXPH2     | -0.0149 | 0.9663 |
| 11076 | A07 | 2237  | 131831 | FAM194A   | -0.0149 | 0.9663 |
| 51023 | E05 | 56233 | 64062  | RBM26     | -0.0149 | 0.9663 |
| 11030 | E05 | 8006  | 79139  | DERL1     | -0.0149 | 0.9663 |
| 11044 | G10 | 922   | 1466   | CSRP2     | -0.0149 | 0.9663 |
| 31003 | D07 | 10423 | 92104  | TTC30A    | -0.0149 | 0.9663 |
| 11052 | E12 | 2140  | 7008   | TEF       | -0.0149 | 0.9663 |
| 31017 | E02 | 12521 | 51379  | CRLF3     | -0.0149 | 0.9664 |
| 11079 | B09 | 10091 | 51284  | TLR7      | -0.0149 | 0.9664 |
| 11080 | F10 | 9691  | 57592  | ZNF687    | -0.0149 | 0.9664 |
| 11039 | H04 | 1602  | 80705  | TSGA10    | -0.0148 | 0.9664 |
| 11017 | B04 | 5730  | 797    | CALCB     | -0.0148 | 0.9665 |
| 31034 | G04 | 14857 | 78990  | OTUB2     | -0.0148 | 0.9665 |
| 11027 | B12 | 1536  | 414061 | DNAJB3    | -0.0148 | 0.9666 |
| 11004 | A02 | 295   | 23423  | TMED3     | -0.0148 | 0.9666 |
| 11055 | D06 | 5725  | 84912  | SLC35B4   | -0.0148 | 0.9666 |
| 11025 | B02 | 2336  | 9568   | GABBR2    | -0.0147 | 0.9666 |
| 11045 | F05 | 4332  | 10105  | PPIF      | -0.0147 | 0.9667 |
| 11006 | D05 | 1208  | 90809  | TMEM55B   | -0.0147 | 0.9667 |
| 31006 | B01 | 11299 | 1556   | CYP2B7P1  | -0.0147 | 0.9667 |
| 11003 | F09 | 5447  | 5997   | RGS2      | -0.0147 | 0.9667 |
| 11004 | E09 | 5403  | 80019  | UBTD1     | -0.0147 | 0.9668 |
| 51030 | G03 | 55480 | 4356   | MPP3      | -0.0146 | 0.9669 |
| 11026 | E08 | 215   | 84557  | MAP1LC3A  | -0.0146 | 0.9669 |
| 11034 | B09 | 6289  | 3964   | LGALS8    | -0.0146 | 0.9669 |
| 51029 | B11 | 56471 | 338917 | VSX2      | -0.0146 | 0.9669 |
| 11025 | C07 | 5082  | 81     | ACTN4     | -0.0146 | 0.9670 |
| 11071 | H11 | 6643  | 4176   | MCM7      | -0.0146 | 0.9670 |
| 11024 | F08 | 4765  | 3689   | ITGB2     | -0.0145 | 0.9671 |
| 51001 | B01 | 52578 | 27160  | INGX      | -0.0145 | 0.9671 |
| 11061 | D01 | 2309  | 162972 | ZNF550    | -0.0145 | 0.9671 |
| 51010 | B08 | 54690 | 54754  | FAM22F    | -0.0145 | 0.9671 |
| 11080 | E09 | 1152  | 8500   | PPFIA1    | -0.0145 | 0.9671 |
| 11026 | B08 | 2210  | NA     | NA        | -0.0145 | 0.9672 |

|       |     |       |        |            |         |        |
|-------|-----|-------|--------|------------|---------|--------|
| 11083 | G06 | 6968  | 79897  | RPP21      | -0.0145 | 0.9672 |
| 51028 | F03 | 56626 | 51143  | DYNC1LI1   | -0.0145 | 0.9672 |
| 11024 | B01 | 4369  | 79954  | NOL10      | -0.0145 | 0.9672 |
| 31013 | D03 | 12129 | 79089  | TMUB2      | -0.0144 | 0.9673 |
| 11064 | D09 | 10223 | 139170 | DCAF12L1   | -0.0144 | 0.9673 |
| 11024 | C06 | 9380  | 2035   | EPB41      | -0.0144 | 0.9674 |
| 11064 | B09 | 2388  | 55255  | WDR41      | -0.0144 | 0.9674 |
| 31019 | F04 | 13206 | 27141  | CIDEB      | -0.0144 | 0.9674 |
| 11079 | E09 | 1526  | 10517  | FBXW10     | -0.0144 | 0.9674 |
| 11050 | C06 | 4451  | 84319  | C3orf26    | -0.0144 | 0.9675 |
| 51028 | F04 | 53150 | 83874  | TBC1D10A   | -0.0144 | 0.9675 |
| 11060 | C02 | 5272  | 79750  | ZNF385D    | -0.0144 | 0.9675 |
| 31039 | C03 | 3178  | 9416   | DDX23      | -0.0144 | 0.9675 |
| 31010 | C11 | 11379 | 22979  | EFR3B      | -0.0143 | 0.9675 |
| 11004 | B09 | 9245  | 154075 | SAMD3      | -0.0143 | 0.9675 |
| 11012 | C10 | 6168  | 113278 | C20orf54   | -0.0143 | 0.9676 |
| 11083 | H03 | 2820  | 56911  | C21orf7    | -0.0143 | 0.9676 |
| 11007 | D02 | 2838  | 55069  | C7orf42    | -0.0143 | 0.9676 |
| 51008 | C01 | 54912 | 163589 | TDRD5      | -0.0143 | 0.9677 |
| 11072 | A09 | 8102  | 51514  | DTL        | -0.0143 | 0.9677 |
| 31008 | H10 | 11561 | 129303 | TMEM150A   | -0.0143 | 0.9677 |
| 11070 | H02 | 10088 | 29127  | RACGAP1    | -0.0143 | 0.9677 |
| 11026 | A04 | 945   | 84719  | NCRNA00260 | -0.0142 | 0.9677 |
| 11043 | G06 | 2724  | 79077  | DCTPP1     | -0.0142 | 0.9679 |
| 11024 | G01 | 9494  | 9013   | TAF1C      | -0.0142 | 0.9679 |
| 11085 | B05 | 6359  | 894    | CCND2      | -0.0142 | 0.9679 |
| 51020 | H03 | 56669 | 23705  | CADM1      | -0.0141 | 0.9680 |
| 31045 | B04 | 6906  | 9138   | ARHGEF1    | -0.0141 | 0.9680 |
| 51026 | C02 | 56836 | 5586   | PKN2       | -0.0141 | 0.9680 |
| 11016 | D12 | 9001  | 27067  | STAU2      | -0.0141 | 0.9681 |
| 31009 | D10 | 11789 | 27237  | ARHGEF16   | -0.0140 | 0.9682 |
| 51030 | D10 | 55335 | 58497  | PRUNE      | -0.0140 | 0.9683 |
| 51006 | B05 | 55723 | 8435   | SOAT2      | -0.0140 | 0.9683 |
| 31039 | E11 | 3538  | 4775   | NFATC3     | -0.0140 | 0.9683 |
| 11050 | D07 | 7187  | 22924  | MAPRE3     | -0.0140 | 0.9683 |
| 31003 | E06 | 10433 | 79838  | TMC5       | -0.0140 | 0.9683 |
| 51016 | F11 | 56432 | 401508 | FAM74A4    | -0.0140 | 0.9684 |
| 51029 | F10 | 55571 | 338442 | GPR109A    | -0.0139 | 0.9685 |
| 11041 | E01 | 7166  | 2315   | MLANA      | -0.0139 | 0.9686 |
| 51006 | F03 | 53851 | 283652 | SLC24A5    | -0.0139 | 0.9686 |
| 11047 | A01 | 5108  | 64423  | INF2       | -0.0138 | 0.9687 |
| 11058 | C03 | 4982  | 51225  | ABI3       | -0.0138 | 0.9687 |
| 31010 | H04 | 11819 | 51701  | NLK        | -0.0138 | 0.9688 |
| 31024 | F06 | 13616 | 65980  | BRD9       | -0.0137 | 0.9688 |

|       |     |       |        |          |         |        |
|-------|-----|-------|--------|----------|---------|--------|
| 11025 | D07 | 9538  | 3101   | HK3      | -0.0137 | 0.9689 |
| 31004 | H10 | 10830 | 63917  | GALNT11  | -0.0137 | 0.9689 |
| 11045 | F06 | 4853  | 8817   | FGF18    | -0.0137 | 0.9689 |
| 11003 | C02 | 9527  | 115795 | C3orf24  | -0.0137 | 0.9690 |
| 11028 | A10 | 3706  | 572    | BAD      | -0.0137 | 0.9690 |
| 31037 | B05 | 13340 | 866    | SERPINA6 | -0.0137 | 0.9690 |
| 31001 | G03 | 10722 | 200895 | DHFRL1   | -0.0136 | 0.9691 |
| 51030 | B01 | 56436 | 149069 | DCDC2B   | -0.0136 | 0.9691 |
| 11075 | G01 | 4929  | 9242   | MSC      | -0.0136 | 0.9691 |
| 11082 | G04 | 9036  | 8637   | EIF4EBP3 | -0.0136 | 0.9692 |
| 11077 | C12 | 2236  | 222235 | FBXL13   | -0.0136 | 0.9692 |
| 11006 | H06 | 5684  | 644    | BLVRA    | -0.0136 | 0.9692 |
| 31039 | E10 | 828   | 9306   | SOCS6    | -0.0136 | 0.9692 |
| 11070 | D06 | 8377  | 64123  | ELTD1    | -0.0136 | 0.9692 |
| 51030 | G11 | 55388 | 144715 | RAD9B    | -0.0136 | 0.9693 |
| 51012 | F06 | 53109 | 147949 | ZNF583   | -0.0136 | 0.9693 |
| 11007 | B08 | 8095  | 256380 | SCML4    | -0.0135 | 0.9693 |
| 11037 | G11 | 5233  | 79979  | TRMT2B   | -0.0135 | 0.9693 |
| 11043 | C05 | 8670  | 594855 | CPLX3    | -0.0135 | 0.9693 |
| 11013 | F11 | 5235  | 10956  | OS9      | -0.0135 | 0.9694 |
| 51034 | G02 | 54978 | 389118 | CDHR4    | -0.0135 | 0.9694 |
| 11027 | H07 | 2168  | 126123 | IZUMO2   | -0.0135 | 0.9694 |
| 31036 | F07 | 11983 | 2949   | GSTM5    | -0.0135 | 0.9694 |
| 11001 | C09 | 3089  | 9324   | HMG3     | -0.0135 | 0.9694 |
| 11084 | F12 | 9194  | 26119  | LDLRAP1  | -0.0135 | 0.9695 |
| 51006 | A11 | 54263 | 6539   | SLC6A12  | -0.0134 | 0.9696 |
| 11050 | A06 | 576   | 201158 | FAM18B2  | -0.0134 | 0.9696 |
| 11070 | G09 | 7773  | 284403 | WDR62    | -0.0134 | 0.9696 |
| 11006 | G05 | 3061  | 26063  | DECR2    | -0.0134 | 0.9697 |
| 11071 | H03 | 6034  | 55324  | ABCF3    | -0.0133 | 0.9698 |
| 51009 | B04 | 52952 | 9849   | ZNF518A  | -0.0133 | 0.9698 |
| 51029 | G04 | 56597 | 57335  | ZNF286A  | -0.0133 | 0.9698 |
| 31044 | B07 | 3565  | 84717  | HDGFRP2  | -0.0133 | 0.9698 |
| 11046 | C11 | 4284  | 80762  | NDFIP1   | -0.0133 | 0.9698 |
| 11018 | C03 | 6304  | 10249  | GLYAT    | -0.0133 | 0.9698 |
| 11053 | G09 | 836   | 3964   | LGALS8   | -0.0133 | 0.9698 |
| 31001 | E06 | 10405 | 116135 | LRRC3B   | -0.0133 | 0.9698 |
| 11055 | A07 | 4481  | 11285  | B4GALT7  | -0.0133 | 0.9698 |
| 51034 | A02 | 53726 | 599    | BCL2L2   | -0.0133 | 0.9699 |
| 11085 | E12 | 466   | 116535 | MRGPRF   | -0.0133 | 0.9699 |
| 31006 | A09 | 10990 | 51588  | PIAS4    | -0.0133 | 0.9699 |
| 11013 | E10 | 2987  | 10298  | PAK4     | -0.0132 | 0.9700 |
| 11076 | F12 | 2592  | 2077   | ERF      | -0.0132 | 0.9700 |
| 51001 | C07 | 54402 | 8369   | HIST1H4G | -0.0132 | 0.9700 |

|       |     |       |        |          |         |        |
|-------|-----|-------|--------|----------|---------|--------|
| 31024 | E09 | 13632 | 130557 | ZNF513   | -0.0132 | 0.9701 |
| 11001 | D10 | 2760  | 79024  | MGC5590  | -0.0131 | 0.9702 |
| 11018 | C08 | 6045  | 9636   | ISG15    | -0.0131 | 0.9702 |
| 11087 | H08 | 7900  | 26002  | MOXD1    | -0.0131 | 0.9702 |
| 51009 | D05 | 52856 | 27134  | TJP3     | -0.0131 | 0.9703 |
| 31042 | B10 | 5302  | 92106  | OXNAD1   | -0.0131 | 0.9703 |
| 31031 | F11 | 14506 | 5577   | PRKAR2B  | -0.0131 | 0.9703 |
| 11018 | H05 | 7494  | 54532  | USP53    | -0.0131 | 0.9704 |
| 11040 | G03 | 8614  | 55471  | C2orf56  | -0.0131 | 0.9704 |
| 31015 | E02 | 12799 | 30851  | TAX1BP3  | -0.0130 | 0.9704 |
| 51002 | G09 | 54440 | 8988   | HSPB3    | -0.0130 | 0.9705 |
| 31022 | F01 | 13492 | 152195 | NUDT16P1 | -0.0130 | 0.9705 |
| 11003 | C03 | 5406  | 84332  | DYDC2    | -0.0130 | 0.9705 |
| 11060 | C09 | 4396  | 81576  | CCDC130  | -0.0130 | 0.9705 |
| 51006 | A03 | 53879 | 399664 | MEX3D    | -0.0130 | 0.9706 |
| 51031 | C09 | 53224 | 221391 | OPN5     | -0.0130 | 0.9706 |
| 11061 | G07 | 2317  | 57687  | VAT1L    | -0.0129 | 0.9706 |
| 11017 | F11 | 6641  | 55740  | ENAH     | -0.0129 | 0.9706 |
| 11085 | C02 | 4841  | 51171  | HSD17B14 | -0.0129 | 0.9707 |
| 11016 | C03 | 6484  | 55851  | PSENE1   | -0.0129 | 0.9707 |
| 51011 | A11 | 55123 | 57613  | KIAA1467 | -0.0129 | 0.9708 |
| 31040 | B04 | 9238  | 162137 | MGC34800 | -0.0129 | 0.9708 |
| 11042 | A12 | 4228  | 79966  | SCD5     | -0.0128 | 0.9709 |
| 11051 | G04 | 5794  | 644    | BLVRA    | -0.0128 | 0.9709 |
| 31029 | A03 | 14226 | 58497  | PRUNE    | -0.0128 | 0.9709 |
| 11022 | B12 | 9183  | 1181   | CLCN2    | -0.0128 | 0.9709 |
| 11073 | C07 | 2481  | 170393 | C10orf91 | -0.0128 | 0.9709 |
| 11085 | F03 | 4681  | 29903  | CCDC106  | -0.0128 | 0.9710 |
| 11046 | D06 | 4333  | 51652  | VPS24    | -0.0127 | 0.9711 |
| 31010 | F05 | 11643 | 8986   | RPS6KA4  | -0.0127 | 0.9711 |
| 11049 | G01 | 2922  | 3488   | IGFBP5   | -0.0127 | 0.9711 |
| 31016 | G01 | 12749 | 7580   | ZNF32    | -0.0127 | 0.9711 |
| 31043 | D02 | 7270  | 10084  | PQBP1    | -0.0127 | 0.9712 |
| 11054 | H03 | 9558  | 758    | MPPED1   | -0.0127 | 0.9712 |
| 11061 | F03 | 8399  | 3249   | HPN      | -0.0127 | 0.9712 |
| 11083 | E01 | 3566  | 55092  | TMEM51   | -0.0127 | 0.9712 |
| 51035 | H01 | 54637 | 252884 | ZNF396   | -0.0127 | 0.9712 |
| 11027 | G03 | 8040  | 54534  | MRPL50   | -0.0127 | 0.9712 |
| 51013 | A02 | 55002 | 23203  | PMPCA    | -0.0127 | 0.9713 |
| 11058 | D10 | 9377  | 4987   | OPRL1    | -0.0127 | 0.9713 |
| 11071 | D03 | 199   | 94121  | SYTL4    | -0.0126 | 0.9714 |
| 51029 | F03 | 55692 | 122769 | PPIL5    | -0.0126 | 0.9714 |
| 11040 | E08 | 8889  | 55652  | SLC48A1  | -0.0126 | 0.9714 |
| 31020 | E07 | 13015 | 2212   | FCGR2A   | -0.0126 | 0.9714 |

|       |     |       |        |          |         |        |
|-------|-----|-------|--------|----------|---------|--------|
| 11028 | A01 | 2645  | 26511  | CHIC2    | -0.0126 | 0.9715 |
| 11047 | A12 | 6566  | 84869  | CBR4     | -0.0126 | 0.9715 |
| 51030 | H04 | 55632 | 5634   | PRPS2    | -0.0126 | 0.9715 |
| 31024 | E10 | 13409 | 92689  | FAM114A1 | -0.0126 | 0.9715 |
| 51027 | A10 | 55629 | 259307 | IL4I1    | -0.0125 | 0.9715 |
| 31005 | C08 | 11092 | 64122  | FN3K     | -0.0125 | 0.9715 |
| 31033 | E10 | 14960 | 391356 | C2orf79  | -0.0125 | 0.9716 |
| 51003 | E10 | 54508 | 641372 | ACOT6    | -0.0125 | 0.9716 |
| 31039 | G02 | 9438  | 10607  | TBL3     | -0.0125 | 0.9716 |
| 51035 | G10 | 54914 | 6898   | TAT      | -0.0125 | 0.9716 |
| 31028 | F05 | 14111 | 252884 | ZNF396   | -0.0125 | 0.9717 |
| 31018 | A09 | 13166 | 256355 | RPS2P32  | -0.0125 | 0.9717 |
| 31039 | B10 | 270   | 10493  | VAT1     | -0.0125 | 0.9717 |
| 11002 | B02 | 8602  | 11074  | TRIM31   | -0.0124 | 0.9718 |
| 11022 | B08 | 7668  | 387338 | NSUN4    | -0.0124 | 0.9718 |
| 51002 | G06 | 52657 | 283459 | GATC     | -0.0124 | 0.9718 |
| 11069 | C09 | 4121  | 2329   | FMO4     | -0.0124 | 0.9718 |
| 31001 | A07 | 10507 | 85403  | EAF1     | -0.0124 | 0.9718 |
| 11071 | H10 | 6811  | 8379   | MAD1L1   | -0.0124 | 0.9718 |
| 11051 | B01 | 1588  | 220972 | MARCH8   | -0.0124 | 0.9718 |
| 11077 | B09 | 1657  | 25939  | SAMHD1   | -0.0124 | 0.9719 |
| 11018 | G11 | 4013  | 4714   | NDUFB8   | -0.0124 | 0.9719 |
| 11048 | D12 | 854   | 6132   | RPL8     | -0.0123 | 0.9720 |
| 31040 | E06 | 9668  | 3535   | IGL@     | -0.0123 | 0.9721 |
| 31021 | E05 | 13094 | 5678   | PSG9     | -0.0123 | 0.9721 |
| 51001 | F03 | 52684 | 55539  | KCNQ1DN  | -0.0123 | 0.9721 |
| 31002 | D10 | 10557 | 1133   | CHRM5    | -0.0123 | 0.9721 |
| 51026 | D04 | 55424 | 57715  | SEMA4G   | -0.0123 | 0.9721 |
| 11012 | B08 | 7133  | 143630 | UBQLNL   | -0.0123 | 0.9722 |
| 11070 | E10 | 212   | 5993   | RFX5     | -0.0123 | 0.9722 |
| 11025 | E11 | 2450  | 10392  | NOD1     | -0.0122 | 0.9723 |
| 31024 | C08 | 13718 | 147495 | APCDD1   | -0.0122 | 0.9723 |
| 11043 | E07 | 5454  | 79868  | ALG13    | -0.0122 | 0.9723 |
| 11018 | C01 | 7656  | 10630  | PDPN     | -0.0122 | 0.9724 |
| 11087 | D09 | 378   | 55621  | TRMT1    | -0.0122 | 0.9724 |
| 11086 | E04 | 9541  | 9697   | TRAM2    | -0.0122 | 0.9724 |
| 51004 | C07 | 54030 | 3215   | HOXB5    | -0.0121 | 0.9724 |
| 31016 | G06 | 12556 | 285367 | RPUSD3   | -0.0121 | 0.9724 |
| 31004 | D12 | 10993 | 27338  | UBE2S    | -0.0121 | 0.9725 |
| 11048 | G03 | 6462  | 3113   | HLA-DPA1 | -0.0121 | 0.9725 |
| 51009 | E11 | 53698 | 79674  | VEPH1    | -0.0121 | 0.9725 |
| 11076 | E01 | 5990  | 54976  | C20orf27 | -0.0121 | 0.9725 |
| 51023 | F06 | 53692 | 7093   | TLL2     | -0.0121 | 0.9725 |
| 11079 | D08 | 9701  | 55226  | NAT10    | -0.0121 | 0.9725 |

|       |     |       |           |              |         |        |
|-------|-----|-------|-----------|--------------|---------|--------|
| 11075 | C03 | 1043  | 80097     | MZT2B        | -0.0121 | 0.9725 |
| 11073 | E12 | 4301  | 84267     | C9orf64      | -0.0121 | 0.9726 |
| 51030 | B06 | 56675 | 375248    | ANKRD36      | -0.0121 | 0.9726 |
| 51025 | A03 | 56353 | 10725     | NFAT5        | -0.0120 | 0.9726 |
| 11018 | A10 | 9172  | 57708     | MIER1        | -0.0120 | 0.9727 |
| 11050 | B09 | 429   | 114904    | C1QTNF6      | -0.0120 | 0.9728 |
| 11021 | H01 | 3412  | 51571     | FAM49B       | -0.0120 | 0.9728 |
| 11045 | G11 | 31    | 8773      | SNAP23       | -0.0120 | 0.9728 |
| 11081 | H11 | 2318  | 128439    | SNHG11       | -0.0119 | 0.9729 |
| 11029 | G08 | 312   | 6815      | STYX         | -0.0119 | 0.9729 |
| 11011 | D02 | 670   | 51203     | NUSAP1       | -0.0119 | 0.9730 |
| 11060 | C12 | 8446  | 148022    | TICAM1       | -0.0119 | 0.9730 |
| 11003 | H10 | 5952  | 8766      | RAB11A       | -0.0119 | 0.9730 |
| 11045 | C11 | 9839  | 56311     | ANKRD7       | -0.0119 | 0.9731 |
| 51026 | D09 | 56688 | 23185     | LARP4B       | -0.0119 | 0.9731 |
| 11017 | G11 | 7960  | 51234     | TMEM85       | -0.0118 | 0.9731 |
| 11021 | A10 | 5474  | 354       | KLK3         | -0.0118 | 0.9731 |
| 31007 | D10 | 11531 | 79970     | ZNF767       | -0.0118 | 0.9731 |
| 51026 | A11 | 53372 | 11194     | ABCB8        | -0.0118 | 0.9732 |
| 11051 | B07 | 5909  | 56181     | FAM54B       | -0.0118 | 0.9732 |
| 11032 | C10 | 8293  | 28778     | IGLV6-57     | -0.0118 | 0.9732 |
| 11076 | H03 | 4526  | 11252     | PACSIN2      | -0.0118 | 0.9733 |
| 11077 | A12 | 8539  | 1048      | CEACAM5      | -0.0118 | 0.9733 |
| 11025 | C03 | 4536  | 4171      | MCM2         | -0.0118 | 0.9733 |
| 11028 | B01 | 3090  | 55954     | ZMAT5        | -0.0117 | 0.9733 |
| 51011 | D02 | 53930 | 85406     | DNAJC14      | -0.0117 | 0.9733 |
| 51020 | H08 | 56599 | 153020    | RASGEF1B     | -0.0117 | 0.9733 |
| 11006 | H11 | 8442  | 55924     | C1orf183     | -0.0117 | 0.9734 |
| 11061 | A04 | 4947  | 92595     | ZNF764       | -0.0117 | 0.9734 |
| 11043 | A10 | 5728  | 7320      | UBE2B        | -0.0117 | 0.9734 |
| 31032 | B12 | 14761 | 89910     | UBE3B        | -0.0117 | 0.9734 |
| 11067 | H03 | 7094  | 90993     | CREB3L1      | -0.0117 | 0.9734 |
| 11006 | C04 | 7000  | 1312      | COMT         | -0.0117 | 0.9734 |
| 51032 | C06 | 14135 | 63947     | DMRTC1       | -0.0117 | 0.9735 |
| 31023 | E04 | 13351 | 55208     | DCUN1D2      | -0.0117 | 0.9735 |
| 11027 | C02 | 145   | 5805      | PTS          | -0.0116 | 0.9736 |
| 51034 | E02 | 53811 | 6991      | TCTE3        | -0.0116 | 0.9736 |
| 31028 | F02 | 15041 | 26149     | ZNF658       | -0.0116 | 0.9736 |
| 11025 | C04 | 5171  | 5708      | PSMD2        | -0.0116 | 0.9736 |
| 31033 | H11 | 14897 | 253635    | CCDC75       | -0.0116 | 0.9736 |
| 11027 | E04 | 2018  | 100288797 | LOC100288797 | -0.0116 | 0.9737 |
| 11078 | C09 | 7784  | 9832      | JAKMIP2      | -0.0116 | 0.9737 |
| 11017 | C04 | 6629  | 90737     | PAGE5        | -0.0116 | 0.9737 |
| 51032 | C12 | 56828 | 353145    | LCE3E        | -0.0115 | 0.9738 |

|       |     |       |        |           |         |        |
|-------|-----|-------|--------|-----------|---------|--------|
| 11072 | H07 | 2332  | 85376  | RIMBP3    | -0.0115 | 0.9738 |
| 11059 | G02 | 4857  | 10062  | NR1H3     | -0.0115 | 0.9738 |
| 11020 | C08 | 5764  | 79038  | ZFYVE21   | -0.0115 | 0.9738 |
| 11049 | F08 | 5870  | 3205   | HOXA9     | -0.0115 | 0.9739 |
| 11040 | E02 | 8971  | 1870   | E2F2      | -0.0115 | 0.9739 |
| 51031 | G07 | 53158 | 55916  | NXT2      | -0.0115 | 0.9739 |
| 11016 | A06 | 5661  | 5342   | PLGLB2    | -0.0115 | 0.9739 |
| 11022 | F11 | 7265  | 55638  | SYBU      | -0.0114 | 0.9740 |
| 51004 | E12 | 54627 | 221830 | TWISTNB   | -0.0114 | 0.9740 |
| 11082 | F10 | 1191  | 2172   | FABP6     | -0.0114 | 0.9741 |
| 11076 | D12 | 4020  | 11200  | CHEK2     | -0.0114 | 0.9741 |
| 51030 | C03 | 56460 | 90835  | C16orf93  | -0.0114 | 0.9741 |
| 51006 | A07 | 54137 | 283208 | P4HA3     | -0.0114 | 0.9741 |
| 11002 | B11 | 9514  | 51083  | GAL       | -0.0114 | 0.9741 |
| 31033 | B03 | 14713 | 7408   | VASP      | -0.0114 | 0.9742 |
| 11082 | B12 | 2285  | 554206 | LOC554206 | -0.0114 | 0.9742 |
| 51027 | F09 | 53309 | 10570  | DPYSL4    | -0.0113 | 0.9743 |
| 11073 | A02 | 4831  | 85019  | C18orf45  | -0.0113 | 0.9743 |
| 31002 | F05 | 10269 | 5232   | PGK2      | -0.0113 | 0.9743 |
| 11004 | B11 | 9030  | 26027  | ACOT11    | -0.0113 | 0.9743 |
| 31038 | E04 | 14589 | 2846   | LPAR4     | -0.0113 | 0.9744 |
| 51028 | H04 | 55396 | 151011 | SEPT10    | -0.0113 | 0.9744 |
| 51018 | A11 | 56524 | 386677 | KRTAP10-1 | -0.0113 | 0.9744 |
| 11068 | A05 | 202   | 23074  | UHRF1BP1L | -0.0113 | 0.9744 |
| 11053 | E03 | 5614  | 2267   | FGL1      | -0.0113 | 0.9744 |
| 11085 | B10 | 647   | 84726  | BAT2L1    | -0.0112 | 0.9745 |
| 51029 | B07 | 53304 | 150472 | CBWD2     | -0.0112 | 0.9745 |
| 11082 | C01 | 9133  | 3669   | ISG20     | -0.0112 | 0.9745 |
| 11011 | E10 | 7019  | 7551   | ZNF3      | -0.0112 | 0.9746 |
| 11068 | F03 | 4568  | 55280  | CWF19L1   | -0.0112 | 0.9746 |
| 51012 | F07 | 53656 | 2535   | FZD2      | -0.0112 | 0.9746 |
| 51005 | H09 | 54902 | 5599   | MAPK8     | -0.0112 | 0.9746 |
| 11001 | H06 | 540   | 2919   | CXCL1     | -0.0112 | 0.9746 |
| 51029 | H10 | 56468 | 126868 | C1orf161  | -0.0111 | 0.9747 |
| 51027 | C01 | 56924 | 57532  | NUFIP2    | -0.0111 | 0.9747 |
| 11022 | H01 | 3712  | 55218  | EXD2      | -0.0111 | 0.9747 |
| 11002 | A10 | 796   | 54955  | C1orf109  | -0.0111 | 0.9747 |
| 51035 | F06 | 54981 | 55871  | CBWD1     | -0.0111 | 0.9748 |
| 11077 | A05 | 2040  | 220965 | FAM13C    | -0.0111 | 0.9748 |
| 11021 | A12 | 7190  | 3119   | HLA-DQB1  | -0.0111 | 0.9748 |
| 11045 | G09 | 4591  | 1212   | CLTB      | -0.0111 | 0.9748 |
| 31002 | F08 | 10540 | 84450  | ZNF512    | -0.0111 | 0.9748 |
| 11049 | F09 | 6030  | 5245   | PHB       | -0.0110 | 0.9750 |
| 11056 | E06 | 2755  | 55146  | ZDHHC4    | -0.0110 | 0.9750 |

|       |     |       |        |            |         |        |
|-------|-----|-------|--------|------------|---------|--------|
| 11034 | B03 | 6108  | 9052   | GPRC5A     | -0.0110 | 0.9750 |
| 11019 | C09 | 7408  | 116441 | TM4SF18    | -0.0110 | 0.9750 |
| 11024 | G02 | 10110 | 5863   | RGL2       | -0.0109 | 0.9751 |
| 11073 | B05 | 4269  | 10899  | JTB        | -0.0109 | 0.9751 |
| 31041 | A05 | 9053  | 57142  | RTN4       | -0.0109 | 0.9751 |
| 11062 | B11 | 8437  | 144193 | AMDHD1     | -0.0109 | 0.9752 |
| 11008 | D10 | 263   | 4856   | NOV        | -0.0109 | 0.9752 |
| 31008 | C11 | 11592 | 220323 | OAF        | -0.0109 | 0.9752 |
| 11056 | D11 | 5457  | 26751  | SH3YL1     | -0.0109 | 0.9753 |
| 51005 | C04 | 54184 | 148109 | FAM187B    | -0.0109 | 0.9753 |
| 31017 | B10 | 13063 | 57817  | HAMP       | -0.0109 | 0.9753 |
| 11047 | G07 | 4095  | 55013  | CCDC109B   | -0.0109 | 0.9753 |
| 51035 | B02 | 53803 | 254042 | MAP1D      | -0.0109 | 0.9753 |
| 11006 | F04 | 8394  | 3903   | LAIR1      | -0.0109 | 0.9753 |
| 11085 | C12 | 3971  | 23647  | ARFIP2     | -0.0109 | 0.9753 |
| 11036 | B05 | 6038  | 871    | SERPINH1   | -0.0108 | 0.9754 |
| 11074 | H05 | 8895  | 10528  | NOP56      | -0.0108 | 0.9754 |
| 31003 | D01 | 10531 | 161835 | FSIP1      | -0.0108 | 0.9754 |
| 11088 | A10 | 400   | 89866  | SEC16B     | -0.0108 | 0.9754 |
| 31016 | D09 | 12657 | 755    | C21orf2    | -0.0108 | 0.9754 |
| 11058 | D05 | 8086  | 6752   | SSTR2      | -0.0108 | 0.9754 |
| 31045 | E09 | 7928  | 54820  | NDE1       | -0.0108 | 0.9754 |
| 51035 | F09 | 54152 | 27303  | RBMS3      | -0.0108 | 0.9754 |
| 11054 | D04 | 1253  | 1393   | CRHBP      | -0.0108 | 0.9754 |
| 51035 | C04 | 54218 | 5460   | POU5F1     | -0.0108 | 0.9755 |
| 11053 | E12 | 4824  | 11343  | MGLL       | -0.0108 | 0.9755 |
| 11087 | G08 | 291   | 1781   | DYNC1I2    | -0.0108 | 0.9755 |
| 11088 | A06 | 8285  | 64881  | PCDH20     | -0.0108 | 0.9755 |
| 11049 | B10 | 1049  | 51107  | APH1A      | -0.0108 | 0.9755 |
| 11011 | B07 | 8872  | 54882  | ANKHD1     | -0.0107 | 0.9756 |
| 11032 | C06 | 9511  | 28990  | ASTE1      | -0.0107 | 0.9756 |
| 31044 | C05 | 4685  | 22928  | SEPHS2     | -0.0107 | 0.9756 |
| 11045 | B04 | 510   | 8738   | CRADD      | -0.0107 | 0.9756 |
| 11039 | B06 | 5280  | 10992  | SF3B2      | -0.0107 | 0.9757 |
| 11079 | A01 | 5884  | 9894   | TELO2      | -0.0107 | 0.9757 |
| 11069 | D03 | 6510  | 91775  | FAM55C     | -0.0107 | 0.9757 |
| 11078 | A10 | 5820  | 8751   | ADAM15     | -0.0107 | 0.9758 |
| 11003 | G10 | 9759  | 338339 | CLEC4D     | -0.0107 | 0.9758 |
| 11053 | C08 | 4577  | 6382   | SDC1       | -0.0106 | 0.9758 |
| 31030 | B09 | 14297 | 54455  | FBXO42     | -0.0106 | 0.9760 |
| 51025 | C03 | 56885 | 9202   | ZMYM4      | -0.0105 | 0.9761 |
| 51029 | B03 | 55634 | 989    | SEPT7      | -0.0105 | 0.9761 |
| 11022 | A07 | 7651  | 3561   | IL2RG      | -0.0105 | 0.9762 |
| 51001 | F01 | 52620 | 118421 | NCRNA00161 | -0.0105 | 0.9762 |



|       |     |       |        |          |         |        |
|-------|-----|-------|--------|----------|---------|--------|
| 11081 | D09 | 4122  | 79158  | GNPTAB   | -0.0105 | 0.9762 |
| 11006 | E12 | 9495  | 79841  | AGBL2    | -0.0104 | 0.9762 |
| 11073 | E10 | 2511  | 63027  | SLC22A23 | -0.0104 | 0.9762 |
| 11082 | A02 | 8847  | 23518  | R3HDM1   | -0.0104 | 0.9763 |
| 11039 | C09 | 5949  | 7753   | ZNF202   | -0.0104 | 0.9763 |
| 11036 | F03 | 4664  | 9319   | TRIP13   | -0.0104 | 0.9763 |
| 31011 | A12 | 11999 | 55744  | C7orf44  | -0.0104 | 0.9763 |
| 31004 | F01 | 10712 | 7301   | TYRO3    | -0.0104 | 0.9763 |
| 31007 | F07 | 10846 | 9989   | PPP4R1   | -0.0104 | 0.9764 |
| 51002 | H08 | 52697 | 54866  | PPP1R14D | -0.0104 | 0.9764 |
| 31009 | D03 | 11490 | 129401 | NUP35    | -0.0104 | 0.9764 |
| 51008 | B03 | 55186 | 9187   | SLC24A1  | -0.0104 | 0.9764 |
| 11032 | F11 | 2245  | 253980 | KCTD13   | -0.0103 | 0.9765 |
| 11069 | D11 | 6466  | 55731  | C17orf63 | -0.0103 | 0.9765 |
| 51013 | F06 | 52918 | 118663 | BTBD16   | -0.0103 | 0.9765 |
| 11001 | D11 | 9336  | 8396   | PIP4K2B  | -0.0103 | 0.9765 |
| 11072 | B09 | 482   | 79092  | CARD14   | -0.0103 | 0.9766 |
| 11053 | A08 | 182   | 55379  | LRRC59   | -0.0103 | 0.9766 |
| 11029 | B06 | 6773  | 7104   | TM4SF4   | -0.0103 | 0.9767 |
| 31029 | C11 | 14349 | 284273 | ZADH2    | -0.0102 | 0.9767 |
| 11087 | G06 | 4394  | 56896  | DPYSL5   | -0.0102 | 0.9767 |
| 31031 | D02 | 14489 | 2512   | FTL      | -0.0102 | 0.9767 |
| 11082 | F05 | 9334  | 9746   | CLSTN3   | -0.0102 | 0.9768 |
| 11072 | D06 | 6911  | 2677   | GGCX     | -0.0102 | 0.9768 |
| 11052 | F04 | 6783  | 79680  | C22orf29 | -0.0102 | 0.9768 |
| 11001 | C02 | 10104 | 6418   | SET      | -0.0102 | 0.9768 |
| 11058 | H04 | 955   | 60     | ACTB     | -0.0102 | 0.9768 |
| 11027 | F12 | 2694  | 5935   | RBM3     | -0.0102 | 0.9768 |
| 31008 | D05 | 11732 | 81618  | ITM2C    | -0.0102 | 0.9768 |
| 31025 | H06 | 13677 | 222663 | SCUBE3   | -0.0102 | 0.9769 |
| 51026 | E03 | 56209 | 91156  | IGFN1    | -0.0101 | 0.9769 |
| 31025 | A10 | 14055 | 8368   | HIST1H4L | -0.0101 | 0.9769 |
| 11053 | H05 | 2324  | 151531 | UPP2     | -0.0101 | 0.9769 |
| 11008 | A06 | 193   | 10363  | HMG20A   | -0.0101 | 0.9770 |
| 11038 | E01 | 5915  | 51163  | DBR1     | -0.0101 | 0.9770 |
| 51034 | G01 | 55056 | 401563 | C9orf139 | -0.0100 | 0.9771 |
| 11072 | D11 | 3648  | 6304   | SATB1    | -0.0100 | 0.9772 |
| 51034 | F02 | 54465 | 200315 | APOBEC3A | -0.0100 | 0.9772 |
| 11029 | F10 | 3570  | 26253  | CLEC4E   | -0.0100 | 0.9772 |
| 11073 | A10 | 3816  | 4814   | NINJ1    | -0.0100 | 0.9773 |
| 31033 | F04 | 14704 | 55735  | DNAJC11  | -0.0100 | 0.9773 |
| 51003 | A05 | 52956 | 353    | APRT     | -0.0100 | 0.9773 |
| 11087 | E09 | 6852  | 10994  | ILVBL    | -0.0099 | 0.9774 |
| 51027 | B05 | 55305 | 89953  | KLC4     | -0.0099 | 0.9774 |

|       |     |       |        |          |         |        |
|-------|-----|-------|--------|----------|---------|--------|
| 11070 | F12 | 7581  | 79613  | TMCO7    | -0.0099 | 0.9774 |
| 11024 | A12 | 4367  | 1209   | CLPTM1   | -0.0099 | 0.9775 |
| 11016 | G02 | 7735  | 6231   | RPS26    | -0.0099 | 0.9775 |
| 11051 | D03 | 3160  | 839    | CASP6    | -0.0099 | 0.9775 |
| 31032 | A11 | 14781 | 8756   | ADAM7    | -0.0099 | 0.9775 |
| 11019 | D03 | 6536  | 26153  | KIF26A   | -0.0098 | 0.9776 |
| 11060 | C04 | 5717  | 55871  | CBWD1    | -0.0098 | 0.9776 |
| 11058 | B08 | 8796  | 25902  | MTHFD1L  | -0.0098 | 0.9777 |
| 11022 | E06 | 7144  | 4782   | NFIC     | -0.0098 | 0.9777 |
| 11002 | B01 | 38    | 6176   | RPLP1    | -0.0098 | 0.9778 |
| 11054 | E10 | 4860  | 84312  | BRMS1L   | -0.0098 | 0.9778 |
| 11050 | G11 | 3031  | 2040   | STOM     | -0.0097 | 0.9779 |
| 11080 | B07 | 1972  | 10749  | KIF1C    | -0.0097 | 0.9779 |
| 11052 | G07 | 363   | 10949  | HNRNPA0  | -0.0097 | 0.9780 |
| 11058 | C01 | 4913  | 54663  | WDR74    | -0.0097 | 0.9780 |
| 11005 | G11 | 9144  | 9963   | SLC23A1  | -0.0097 | 0.9780 |
| 51021 | A03 | 56400 | 55693  | KDM4D    | -0.0097 | 0.9780 |
| 11002 | E06 | 10226 | 29909  | GPR171   | -0.0097 | 0.9780 |
| 11018 | F06 | 9177  | 8520   | HAT1     | -0.0096 | 0.9780 |
| 51004 | C06 | 56242 | 148534 | TMEM56   | -0.0096 | 0.9780 |
| 31041 | C12 | 3765  | 132    | ADK      | -0.0096 | 0.9780 |
| 31040 | C09 | 10086 | 550    | AUP1     | -0.0096 | 0.9781 |
| 51014 | A05 | 53025 | 7541   | ZFP161   | -0.0096 | 0.9781 |
| 31042 | F11 | 5548  | 55328  | RNLS     | -0.0096 | 0.9781 |
| 11022 | A12 | 7176  | 5029   | P2RY2    | -0.0096 | 0.9781 |
| 11067 | B10 | 7647  | 5711   | PSMD5    | -0.0096 | 0.9782 |
| 11006 | G04 | 3701  | 1020   | CDK5     | -0.0096 | 0.9782 |
| 51002 | B06 | 54759 | 389320 | C5orf48  | -0.0096 | 0.9782 |
| 11054 | B04 | 3266  | 79644  | SRD5A3   | -0.0095 | 0.9783 |
| 11038 | F02 | 5816  | 57617  | VPS18    | -0.0095 | 0.9783 |
| 51015 | G06 | 52849 | 200539 | ANKRD23  | -0.0095 | 0.9783 |
| 11007 | G11 | 3734  | 4046   | LSP1     | -0.0095 | 0.9783 |
| 11013 | D10 | 7298  | 3853   | KRT6A    | -0.0095 | 0.9783 |
| 11073 | B09 | 2425  | 54957  | TXNL4B   | -0.0095 | 0.9784 |
| 11081 | B02 | 6506  | NA     | NA       | -0.0095 | 0.9784 |
| 11002 | B10 | 9938  | 27232  | GNMT     | -0.0095 | 0.9785 |
| 11016 | C11 | 5664  | 27258  | LSM3     | -0.0094 | 0.9785 |
| 11045 | D10 | 771   | 50810  | HDGFRP3  | -0.0094 | 0.9785 |
| 11076 | E07 | 2073  | 256471 | MFSD8    | -0.0094 | 0.9786 |
| 11009 | B09 | 300   | 2592   | GALT     | -0.0094 | 0.9786 |
| 31041 | E03 | 7116  | 64083  | GOLPH3   | -0.0094 | 0.9787 |
| 51002 | C07 | 52596 | 283422 | C12orf36 | -0.0094 | 0.9787 |
| 11021 | D08 | 5455  | 6503   | SLA      | -0.0093 | 0.9787 |
| 11062 | D03 | 9915  | 115350 | FCRL1    | -0.0093 | 0.9788 |

|       |     |       |        |           |         |        |
|-------|-----|-------|--------|-----------|---------|--------|
| 11054 | G03 | 5515  | 3987   | LIMS1     | -0.0093 | 0.9788 |
| 11060 | A08 | 4635  | 27316  | RBMX      | -0.0093 | 0.9788 |
| 11030 | A07 | 3999  | 5049   | PAFAH1B2  | -0.0093 | 0.9789 |
| 11009 | G05 | 1838  | 81628  | TSC22D4   | -0.0092 | 0.9790 |
| 11017 | B12 | 5782  | 84298  | LLPH      | -0.0092 | 0.9790 |
| 11015 | C11 | 9004  | 11261  | CHP       | -0.0092 | 0.9790 |
| 51024 | B04 | 56239 | 114821 | SCAND3    | -0.0092 | 0.9790 |
| 11072 | D03 | 142   | 9927   | MFN2      | -0.0092 | 0.9790 |
| 51029 | A11 | 55498 | 2140   | EYA3      | -0.0092 | 0.9790 |
| 11088 | H07 | 817   | 590    | BCHE      | -0.0092 | 0.9791 |
| 11040 | B02 | 2460  | 6235   | RPS29     | -0.0092 | 0.9791 |
| 51031 | D12 | 56903 | 440482 | ANKRD20A5 | -0.0092 | 0.9791 |
| 31029 | F03 | 14277 | 1270   | CNTF      | -0.0092 | 0.9791 |
| 51028 | E08 | 56140 | 440503 | PLIN5     | -0.0092 | 0.9791 |
| 11073 | C08 | 4276  | 318    | NUDT2     | -0.0092 | 0.9791 |
| 11037 | F07 | 3152  | 3065   | HDAC1     | -0.0091 | 0.9792 |
| 11063 | C11 | 10127 | 11322  | TMC6      | -0.0091 | 0.9792 |
| 51006 | H05 | 54751 | 137209 | ZNF572    | -0.0091 | 0.9792 |
| 31006 | D09 | 10969 | 79883  | PODNL1    | -0.0091 | 0.9792 |
| 11032 | F09 | 9975  | 2246   | FGF1      | -0.0091 | 0.9792 |
| 31025 | E03 | 13442 | 23595  | ORC3L     | -0.0091 | 0.9793 |
| 31015 | C12 | 12787 | 64231  | MS4A6A    | -0.0091 | 0.9793 |
| 11003 | F08 | 2345  | 147719 | LYPD4     | -0.0091 | 0.9794 |
| 11025 | A11 | 1910  | 84229  | CCDC135   | -0.0090 | 0.9794 |
| 11055 | G03 | 2272  | 9901   | SRGAP3    | -0.0090 | 0.9794 |
| 11017 | A05 | 5902  | 51504  | TRMT112   | -0.0090 | 0.9794 |
| 51015 | E02 | 53005 | 150864 | FAM117B   | -0.0090 | 0.9795 |
| 11065 | H06 | 9789  | 7266   | DNAJC7    | -0.0090 | 0.9795 |
| 11081 | G09 | 3094  | 2791   | GNG11     | -0.0090 | 0.9795 |
| 11012 | E03 | 6447  | 55006  | TRMT61B   | -0.0090 | 0.9795 |
| 31024 | F10 | 13721 | 63978  | PRDM14    | -0.0090 | 0.9795 |
| 11009 | C10 | 4930  | 8788   | DLK1      | -0.0090 | 0.9795 |
| 11072 | H10 | 6823  | 440275 | EIF2AK4   | -0.0090 | 0.9795 |
| 11013 | D08 | 4475  | 11083  | DIDO1     | -0.0090 | 0.9796 |
| 31039 | F06 | 2772  | 60370  | AVPI1     | -0.0090 | 0.9796 |
| 31019 | C10 | 13173 | 51382  | ATP6V1D   | -0.0089 | 0.9796 |
| 11001 | F12 | 135   | 282991 | BLOC1S2   | -0.0089 | 0.9797 |
| 51005 | F10 | 54828 | 378465 | HSN2      | -0.0089 | 0.9797 |
| 31040 | F02 | 2202  | 57717  | PCDHB16   | -0.0089 | 0.9797 |
| 51023 | E08 | 55893 | 5291   | PIK3CB    | -0.0089 | 0.9797 |
| 31044 | E12 | 2735  | 306    | ANXA3     | -0.0089 | 0.9798 |
| 11077 | H04 | 820   | 10513  | APPBP2    | -0.0088 | 0.9799 |
| 31024 | D03 | 13784 | 144501 | KRT80     | -0.0088 | 0.9799 |
| 11004 | B07 | 8761  | 728294 | D2HGDH    | -0.0088 | 0.9799 |

|       |     |       |        |         |         |        |
|-------|-----|-------|--------|---------|---------|--------|
| 51011 | F12 | 52872 | 160728 | SLC5A8  | -0.0088 | 0.9799 |
| 31036 | G01 | 11269 | 84696  | ABHD1   | -0.0088 | 0.9799 |
| 31007 | B03 | 11061 | 89944  | GLB1L2  | -0.0088 | 0.9799 |
| 31004 | E03 | 10765 | 80216  | ALPK1   | -0.0088 | 0.9799 |
| 51032 | G02 | 55460 | 2323   | FLT3LG  | -0.0088 | 0.9800 |
| 31027 | G11 | 14260 | 164091 | PAQR7   | -0.0088 | 0.9800 |
| 11076 | H04 | 4730  | 6518   | SLC2A5  | -0.0087 | 0.9801 |
| 31008 | E11 | 11461 | 23673  | STX12   | -0.0087 | 0.9801 |
| 11080 | H10 | 7674  | 6499   | SKIV2L  | -0.0087 | 0.9801 |
| 11003 | G11 | 339   | 5868   | RAB5A   | -0.0087 | 0.9802 |
| 11078 | A11 | 1449  | 10600  | USP16   | -0.0087 | 0.9802 |
| 11053 | A04 | 2725  | 26984  | SEC22A  | -0.0087 | 0.9802 |
| 51003 | E05 | 54196 | 22921  | MSRB2   | -0.0087 | 0.9802 |
| 11074 | B06 | 3804  | 80776  | B9D2    | -0.0087 | 0.9802 |
| 11050 | A05 | 9074  | 23450  | SF3B3   | -0.0087 | 0.9802 |
| 11078 | D12 | 1701  | 256309 | CCDC110 | -0.0086 | 0.9803 |
| 11018 | H02 | 9051  | 55789  | DEPDC1B | -0.0086 | 0.9803 |
| 11015 | F09 | 7107  | 285381 | DPH3    | -0.0086 | 0.9804 |
| 11081 | D06 | 9670  | 4501   | MT1X    | -0.0086 | 0.9804 |
| 51005 | G03 | 54990 | 283212 | KLHL35  | -0.0086 | 0.9804 |
| 31019 | G10 | 13168 | 83661  | MS4A8B  | -0.0086 | 0.9804 |
| 31014 | C01 | 12056 | 57185  | NIPAL3  | -0.0086 | 0.9805 |
| 51011 | E05 | 52842 | 155038 | GIMAP8  | -0.0086 | 0.9805 |
| 51018 | C06 | 55986 | 5645   | PRSS2   | -0.0086 | 0.9805 |
| 11001 | A04 | 8745  | 2625   | GATA3   | -0.0085 | 0.9805 |
| 31045 | B03 | 752   | 6117   | RPA1    | -0.0085 | 0.9806 |
| 51034 | D04 | 53823 | 23254  | KAZ     | -0.0085 | 0.9806 |
| 11057 | F07 | 9423  | 1101   | CHAD    | -0.0085 | 0.9806 |
| 31024 | B02 | 13760 | 25966  | C2CD2   | -0.0085 | 0.9807 |
| 31040 | E03 | 2914  | 6601   | SMARCC2 | -0.0085 | 0.9807 |
| 11026 | B04 | 8358  | 6367   | CCL22   | -0.0085 | 0.9807 |
| 11004 | F09 | 2843  | 10434  | LYPLA1  | -0.0085 | 0.9807 |
| 11030 | C09 | 7452  | 51181  | DCXR    | -0.0085 | 0.9807 |
| 11067 | F03 | 7894  | 10818  | FRS2    | -0.0085 | 0.9807 |
| 11020 | G05 | 5181  | 7167   | TPI1    | -0.0084 | 0.9808 |
| 11043 | H03 | 4508  | 4716   | NDUFB10 | -0.0084 | 0.9808 |
| 31008 | A03 | 11800 | 5879   | RAC1    | -0.0084 | 0.9808 |
| 11015 | A10 | 8991  | 84333  | PCGF5   | -0.0084 | 0.9808 |
| 11018 | F01 | 6063  | 261726 | TIPRL   | -0.0084 | 0.9809 |
| 31024 | D06 | 13325 | 2638   | GC      | -0.0084 | 0.9809 |
| 11040 | D05 | 1014  | 10879  | SMR3B   | -0.0084 | 0.9809 |
| 51006 | F10 | 56639 | 57645  | POGK    | -0.0084 | 0.9809 |
| 11082 | D09 | 8691  | 64924  | SLC30A5 | -0.0084 | 0.9809 |
| 31039 | D02 | 9325  | 10505  | SEMA4F  | -0.0084 | 0.9809 |

|       |     |       |           |           |         |        |
|-------|-----|-------|-----------|-----------|---------|--------|
| 11056 | B11 | 3003  | 23310     | NCAPD3    | -0.0084 | 0.9809 |
| 51030 | G08 | 56418 | 155060    | ZNF783    | -0.0083 | 0.9810 |
| 51024 | F02 | 56066 | 5858      | PZP       | -0.0083 | 0.9810 |
| 31043 | E07 | 6496  | 55422     | ZNF331    | -0.0083 | 0.9810 |
| 11081 | D11 | 7962  | 2281      | FKBP1B    | -0.0083 | 0.9810 |
| 11039 | D08 | 6311  | 9984      | THOC1     | -0.0083 | 0.9810 |
| 51012 | C10 | 53703 | 127544    | RNF19B    | -0.0083 | 0.9810 |
| 51003 | B03 | 52843 | 347736    | TXNDC6    | -0.0083 | 0.9811 |
| 11086 | E08 | 4656  | 6502      | SKP2      | -0.0083 | 0.9811 |
| 11015 | E02 | 5662  | 59286     | UBL5      | -0.0083 | 0.9812 |
| 11016 | E02 | 7422  | 56892     | C8orf4    | -0.0083 | 0.9812 |
| 31028 | C09 | 14168 | 25956     | SEC31B    | -0.0082 | 0.9812 |
| 51011 | D09 | 53615 | 3752      | KCND3     | -0.0082 | 0.9813 |
| 11005 | A04 | 2600  | 55332     | DRAM1     | -0.0082 | 0.9813 |
| 31016 | F03 | 12734 | 26232     | FBXO2     | -0.0082 | 0.9813 |
| 31012 | A07 | 12047 | 79663     | HSPBAP1   | -0.0082 | 0.9813 |
| 51023 | C09 | 56329 | 121256    | TMEM132D  | -0.0082 | 0.9814 |
| 11082 | E12 | 763   | 1528      | CYB5A     | -0.0082 | 0.9814 |
| 11086 | E02 | 7435  | 51629     | SLC25A39  | -0.0082 | 0.9814 |
| 11044 | E12 | 6326  | 7135      | TNNI1     | -0.0081 | 0.9814 |
| 11035 | C05 | 9892  | 5025      | P2RX4     | -0.0081 | 0.9815 |
| 51001 | B11 | 54269 | 152078    | C3orf55   | -0.0081 | 0.9815 |
| 51032 | E10 | 56943 | 400746    | C1orf130  | -0.0081 | 0.9815 |
| 11048 | C10 | 8656  | 130940    | CCDC148   | -0.0081 | 0.9816 |
| 11054 | D07 | 7002  | 91663     | MYADM     | -0.0081 | 0.9816 |
| 31035 | F02 | 15000 | 55770     | EXOC2     | -0.0081 | 0.9816 |
| 11017 | F06 | 8601  | 8848      | TSC22D1   | -0.0081 | 0.9816 |
| 11001 | D07 | 2962  | 122616    | C14orf79  | -0.0080 | 0.9816 |
| 11043 | C09 | 4384  | 4149      | MAX       | -0.0080 | 0.9817 |
| 11087 | D01 | 8144  | 375748    | C9orf102  | -0.0080 | 0.9817 |
| 11051 | H02 | 5013  | 23475     | QPRT      | -0.0080 | 0.9817 |
| 51031 | F03 | 55356 | 339047    | LOC339047 | -0.0080 | 0.9818 |
| 51001 | H08 | 52747 | 100130934 | ZNF663    | -0.0080 | 0.9818 |
| 31007 | D04 | 11279 | 116113    | FOXP4     | -0.0080 | 0.9818 |
| 51011 | A03 | 52796 | 4603      | MYBL1     | -0.0080 | 0.9818 |
| 11046 | G02 | 6290  | 9027      | NAT8      | -0.0080 | 0.9818 |
| 31016 | D07 | 12739 | 2773      | GNAI3     | -0.0080 | 0.9818 |
| 11059 | E09 | 7167  | 23746     | AIPL1     | -0.0080 | 0.9819 |
| 11016 | D06 | 7533  | 8294      | HIST1H4I  | -0.0079 | 0.9819 |
| 11068 | C04 | 6454  | 3073      | HEXA      | -0.0079 | 0.9819 |
| 31042 | D02 | 6511  | 93082     | NEURL3    | -0.0079 | 0.9820 |
| 11059 | E02 | 444   | 1238      | CCBP2     | -0.0079 | 0.9820 |
| 31032 | E05 | 14497 | 55760     | DHX32     | -0.0079 | 0.9821 |
| 11082 | F06 | 7039  | 51728     | POLR3K    | -0.0079 | 0.9821 |

|       |     |       |        |          |         |        |
|-------|-----|-------|--------|----------|---------|--------|
| 11036 | E09 | 9440  | 28988  | DBNL     | -0.0078 | 0.9821 |
| 51030 | F10 | 55312 | 5306   | PITPNA   | -0.0078 | 0.9821 |
| 31040 | C06 | 9953  | 2123   | EVI2A    | -0.0078 | 0.9822 |
| 11087 | C08 | 3001  | 9061   | PAPSS1   | -0.0078 | 0.9822 |
| 31016 | A05 | 12592 | 10212  | DDX39    | -0.0078 | 0.9822 |
| 11049 | D09 | 191   | 6591   | SNAI2    | -0.0078 | 0.9822 |
| 11006 | B07 | 9272  | 81629  | TSSK3    | -0.0078 | 0.9822 |
| 11004 | E03 | 1785  | 57185  | NIPAL3   | -0.0078 | 0.9823 |
| 11025 | C12 | 2536  | 6525   | SMTN     | -0.0077 | 0.9823 |
| 11009 | B01 | 6701  | 70     | ACTC1    | -0.0077 | 0.9823 |
| 11015 | F10 | 7534  | 6726   | SRP9     | -0.0077 | 0.9824 |
| 11061 | A01 | 4816  | 5164   | PDK2     | -0.0077 | 0.9824 |
| 11008 | C09 | 5010  | 51548  | SIRT6    | -0.0077 | 0.9825 |
| 11014 | A02 | 5836  | 27229  | TUBGCP4  | -0.0076 | 0.9825 |
| 11069 | C06 | 7154  | 6584   | SLC22A5  | -0.0076 | 0.9826 |
| 11077 | H06 | 2423  | 6184   | RPN1     | -0.0076 | 0.9826 |
| 11066 | E03 | 6292  | 53371  | NUP54    | -0.0076 | 0.9827 |
| 11062 | B09 | 1479  | 11057  | ABHD2    | -0.0076 | 0.9827 |
| 11012 | D06 | 6252  | 4731   | NDUFV3   | -0.0075 | 0.9828 |
| 51002 | C03 | 52592 | 123264 | OSTBETA  | -0.0075 | 0.9828 |
| 11053 | G10 | 3389  | 231    | AKR1B1   | -0.0075 | 0.9828 |
| 31021 | B11 | 12982 | 55602  | CDKN2AIP | -0.0075 | 0.9829 |
| 11074 | F08 | 1653  | 377    | ARF3     | -0.0075 | 0.9829 |
| 11010 | C11 | 6736  | 9775   | EIF4A3   | -0.0075 | 0.9829 |
| 51011 | H08 | 52919 | 374879 | ZNF699   | -0.0075 | 0.9829 |
| 31019 | G01 | 13164 | 54622  | ARL15    | -0.0075 | 0.9829 |
| 11045 | E08 | 1057  | 29063  | ZCCHC4   | -0.0074 | 0.9830 |
| 11054 | E09 | 5888  | 5524   | PPP2R4   | -0.0074 | 0.9830 |
| 11063 | G09 | 2430  | 3611   | ILK      | -0.0074 | 0.9830 |
| 31012 | G10 | 11931 | 9582   | APOBEC3B | -0.0074 | 0.9831 |
| 11011 | D08 | 2906  | 30008  | EFEMP2   | -0.0074 | 0.9831 |
| 51035 | A07 | 53589 | 7201   | TRHR     | -0.0074 | 0.9831 |
| 31045 | H03 | 7044  | 10607  | TBL3     | -0.0074 | 0.9831 |
| 51024 | E03 | 55211 | 3895   | KTN1     | -0.0074 | 0.9831 |
| 51032 | A11 | 53138 | 9491   | PSMF1    | -0.0074 | 0.9831 |
| 51001 | H04 | 52623 | 4738   | NEDD8    | -0.0074 | 0.9831 |
| 51033 | G05 | 54947 | 404552 | SCGB1D4  | -0.0074 | 0.9831 |
| 51027 | E02 | 56686 | 9183   | ZW10     | -0.0074 | 0.9832 |
| 31007 | E01 | 11040 | 8139   | GAN      | -0.0074 | 0.9832 |
| 11007 | C08 | 6474  | 55658  | RNF126   | -0.0073 | 0.9832 |
| 11015 | C04 | 5459  | 29796  | UQCR10   | -0.0073 | 0.9833 |
| 11054 | A05 | 5178  | 1937   | EEF1G    | -0.0073 | 0.9833 |
| 11032 | C11 | 7816  | 143686 | SESN3    | -0.0073 | 0.9833 |
| 11046 | C02 | 9079  | 5156   | PDGFRA   | -0.0073 | 0.9833 |

|       |     |       |        |            |         |        |
|-------|-----|-------|--------|------------|---------|--------|
| 11042 | E05 | 2248  | 8674   | VAMP4      | -0.0073 | 0.9833 |
| 51004 | F06 | 53747 | 29082  | CHMP4A     | -0.0073 | 0.9833 |
| 11041 | D05 | 5049  | 91368  | CDKN2AIPNL | -0.0073 | 0.9833 |
| 31036 | B10 | 12344 | 51056  | LAP3       | -0.0073 | 0.9834 |
| 11021 | E09 | 5731  | 51184  | GPN3       | -0.0073 | 0.9834 |
| 11006 | E10 | 2105  | 10557  | RPP38      | -0.0073 | 0.9834 |
| 11074 | H02 | 3933  | 1032   | CDKN2D     | -0.0073 | 0.9834 |
| 11046 | D12 | 9426  | 414157 | C10orf62   | -0.0072 | 0.9835 |
| 31043 | B03 | 5273  | 79672  | FN3KRP     | -0.0072 | 0.9835 |
| 51029 | F01 | 55668 | 286207 | C9orf117   | -0.0072 | 0.9835 |
| 11074 | F04 | 3802  | 10440  | TIMM17A    | -0.0072 | 0.9835 |
| 51006 | F05 | 53358 | 5427   | POLE2      | -0.0072 | 0.9836 |
| 31028 | B04 | 14177 | 6489   | ST8SIA1    | -0.0072 | 0.9836 |
| 11017 | C07 | 9040  | 25901  | CCDC28A    | -0.0072 | 0.9836 |
| 11077 | F01 | 1247  | 8720   | MBTPS1     | -0.0072 | 0.9836 |
| 31019 | D01 | 13304 | 51626  | DYNC2LI1   | -0.0072 | 0.9836 |
| 11026 | C11 | 3973  | 26071  | FAM127B    | -0.0072 | 0.9837 |
| 51024 | G10 | 55147 | 7158   | TP53BP1    | -0.0071 | 0.9837 |
| 11051 | F07 | 906   | 27249  | MMADHC     | -0.0071 | 0.9838 |
| 11087 | E07 | 2367  | 782    | CACNB1     | -0.0071 | 0.9838 |
| 11057 | H06 | 779   | 7004   | TEAD4      | -0.0071 | 0.9838 |
| 31044 | A01 | 8985  | 84331  | FAM195A    | -0.0071 | 0.9838 |
| 11067 | E08 | 8219  | 84878  | ZBTB45     | -0.0071 | 0.9839 |
| 51015 | F10 | 52837 | 140902 | R3HDML     | -0.0070 | 0.9839 |
| 11086 | G06 | 5068  | 5452   | POU2F2     | -0.0070 | 0.9839 |
| 51028 | E07 | 55516 | 116328 | C8orf34    | -0.0070 | 0.9840 |
| 11048 | E11 | 719   | 25972  | UNC50      | -0.0070 | 0.9840 |
| 31016 | E09 | 12692 | 55217  | TMLHE      | -0.0070 | 0.9840 |
| 51006 | C02 | 53592 | 8233   | ZRSR2      | -0.0070 | 0.9840 |
| 31020 | E09 | 12846 | 9184   | BUB3       | -0.0070 | 0.9841 |
| 51005 | D08 | 53814 | 148362 | C1orf58    | -0.0070 | 0.9841 |
| 11066 | C07 | 10034 | 84102  | SLC41A2    | -0.0069 | 0.9842 |
| 11074 | B04 | 4117  | 7326   | UBE2G1     | -0.0069 | 0.9842 |
| 31040 | H06 | 10204 | 11123  | RCAN3      | -0.0069 | 0.9842 |
| 11064 | C05 | 4931  | 1128   | CHRM1      | -0.0069 | 0.9842 |
| 11037 | F03 | 3136  | 9885   | OSBPL2     | -0.0069 | 0.9843 |
| 11008 | D09 | 3148  | 8665   | EIF3F      | -0.0068 | 0.9844 |
| 11051 | G07 | 8795  | 2175   | FANCA      | -0.0068 | 0.9844 |
| 11081 | B10 | 4341  | 10974  | C10orf116  | -0.0068 | 0.9844 |
| 11045 | F10 | 3079  | 11009  | IL24       | -0.0068 | 0.9844 |
| 11041 | G10 | 4306  | 80774  | LIMD2      | -0.0068 | 0.9844 |
| 11061 | C11 | 5953  | 1509   | CTSD       | -0.0068 | 0.9844 |
| 11032 | H02 | 4143  | 10417  | SPON2      | -0.0068 | 0.9845 |
| 11048 | A01 | 9447  | 284427 | SLC25A41   | -0.0068 | 0.9845 |

|       |     |       |        |           |         |        |
|-------|-----|-------|--------|-----------|---------|--------|
| 31023 | D05 | 13703 | 167826 | OLIG3     | -0.0068 | 0.9845 |
| 11034 | G01 | 3359  | 50814  | NSDHL     | -0.0068 | 0.9845 |
| 51011 | F01 | 53066 | 7691   | ZNF132    | -0.0068 | 0.9846 |
| 11056 | F05 | 1888  | 23034  | SAMD4A    | -0.0068 | 0.9846 |
| 51006 | C05 | 53855 | 115004 | C6orf150  | -0.0067 | 0.9846 |
| 11070 | B03 | 8290  | 10990  | LILRB5    | -0.0067 | 0.9846 |
| 51006 | D04 | 54589 | 4067   | LYN       | -0.0067 | 0.9846 |
| 51010 | G08 | 54901 | 123722 | FSD2      | -0.0067 | 0.9847 |
| 51034 | B11 | 55110 | 129450 | C2orf60   | -0.0067 | 0.9847 |
| 11049 | B04 | 920   | 6880   | TAF9      | -0.0067 | 0.9847 |
| 31041 | C03 | 3137  | 9761   | MLEC      | -0.0067 | 0.9847 |
| 11079 | C10 | 7715  | 55112  | WDR60     | -0.0067 | 0.9847 |
| 31008 | C12 | 11404 | 79660  | PPP1R3B   | -0.0067 | 0.9847 |
| 11047 | H10 | 5055  | 81932  | HDHD3     | -0.0067 | 0.9848 |
| 11017 | D12 | 7034  | 6158   | RPL28     | -0.0067 | 0.9848 |
| 11049 | H08 | 381   | 54472  | TOLLIP    | -0.0067 | 0.9848 |
| 11042 | E07 | 8297  | 3050   | HBZ       | -0.0066 | 0.9848 |
| 11022 | E05 | 7687  | 5267   | SERPINA4  | -0.0066 | 0.9848 |
| 51020 | G09 | 56031 | 343070 | PRAMEF9   | -0.0066 | 0.9849 |
| 51034 | F06 | 55078 | 401260 | FLJ41649  | -0.0066 | 0.9850 |
| 11078 | H08 | 7031  | 6890   | TAP1      | -0.0066 | 0.9850 |
| 11021 | G04 | 7032  | 65992  | DDRGK1    | -0.0066 | 0.9850 |
| 51021 | D03 | 56412 | 60626  | RIC8A     | -0.0066 | 0.9850 |
| 31039 | G07 | 1787  | 1176   | AP3S1     | -0.0066 | 0.9850 |
| 11004 | D01 | 8386  | 83888  | FGFBP2    | -0.0066 | 0.9850 |
| 11024 | F10 | 9728  | 91949  | COG7      | -0.0065 | 0.9851 |
| 31007 | G09 | 11692 | 144203 | OVOS2     | -0.0065 | 0.9851 |
| 11055 | G02 | 9650  | 55644  | OSGEP     | -0.0065 | 0.9851 |
| 51021 | H04 | 55828 | 9340   | GLP2R     | -0.0065 | 0.9852 |
| 11009 | C02 | 3978  | 2237   | FEN1      | -0.0065 | 0.9852 |
| 11037 | F10 | 5038  | 1136   | CHRNA3    | -0.0065 | 0.9852 |
| 11064 | E02 | 2154  | 8001   | GLRA3     | -0.0065 | 0.9852 |
| 11045 | B02 | 9024  | 57142  | RTN4      | -0.0064 | 0.9853 |
| 51021 | C01 | 55819 | 93     | ACVR2B    | -0.0064 | 0.9854 |
| 51002 | C06 | 54502 | 441208 | LOC441208 | -0.0064 | 0.9854 |
| 51003 | A06 | 54462 | 6019   | RLN2      | -0.0064 | 0.9854 |
| 11064 | F02 | 7887  | 29886  | SNX8      | -0.0064 | 0.9855 |
| 31012 | B07 | 12041 | 5723   | PSPH      | -0.0063 | 0.9855 |
| 31034 | B01 | 14932 | 3458   | IFNG      | -0.0063 | 0.9855 |
| 11017 | B05 | 7090  | 6623   | SNCG      | -0.0063 | 0.9856 |
| 11006 | E03 | 8165  | 3038   | HAS3      | -0.0063 | 0.9856 |
| 31020 | E04 | 13296 | 389434 | IYD       | -0.0063 | 0.9856 |
| 51008 | D02 | 54551 | 55236  | UBA6      | -0.0063 | 0.9857 |
| 11085 | F06 | 3225  | 8614   | STC2      | -0.0063 | 0.9857 |



|       |     |       |           |          |         |        |
|-------|-----|-------|-----------|----------|---------|--------|
| 11058 | F08 | 5278  | 84517     | ARPM1    | -0.0063 | 0.9857 |
| 51004 | E10 | 55682 | 1265      | CNN2     | -0.0062 | 0.9858 |
| 11049 | F11 | 6184  | 113622    | ADPRHL1  | -0.0062 | 0.9858 |
| 11086 | B04 | 8587  | 57805     | KIAA1967 | -0.0062 | 0.9858 |
| 11055 | F09 | 5918  | 1762      | DMWD     | -0.0062 | 0.9858 |
| 11006 | A03 | 2556  | 3109      | HLA-DMB  | -0.0062 | 0.9859 |
| 51028 | C12 | 55407 | 100132565 | GOLGA8F  | -0.0062 | 0.9859 |
| 51005 | B09 | 53413 | 989       | SEPT7    | -0.0062 | 0.9859 |
| 11069 | B04 | 10201 | 25975     | EGFL6    | -0.0062 | 0.9859 |
| 11025 | C02 | 10126 | 26009     | ZZZ3     | -0.0062 | 0.9859 |
| 11082 | A11 | 9498  | 5473      | PPBP     | -0.0061 | 0.9859 |
| 11054 | B07 | 5951  | 5831      | PYCR1    | -0.0061 | 0.9859 |
| 11016 | D08 | 9166  | 80339     | PNPLA3   | -0.0061 | 0.9860 |
| 11068 | C03 | 10146 | 57474     | ZNF490   | -0.0061 | 0.9860 |
| 11015 | A03 | 4603  | 79098     | C1orf116 | -0.0061 | 0.9861 |
| 11059 | G07 | 8375  | 8846      | ALKBH1   | -0.0061 | 0.9862 |
| 11084 | E10 | 3535  | 2010      | EMD      | -0.0060 | 0.9862 |
| 51035 | E08 | 53324 | 53944     | CSNK1G1  | -0.0060 | 0.9862 |
| 31007 | E04 | 11296 | 57533     | TBC1D14  | -0.0060 | 0.9862 |
| 11027 | B01 | 936   | 29107     | NXT1     | -0.0060 | 0.9862 |
| 11012 | C05 | 8108  | 55357     | TBC1D2   | -0.0060 | 0.9862 |
| 31042 | B09 | 6962  | 59342     | SCPEP1   | -0.0060 | 0.9863 |
| 11071 | G05 | 336   | 55699     | IARS2    | -0.0060 | 0.9863 |
| 51005 | A05 | 53947 | 387332    | TBPL2    | -0.0060 | 0.9863 |
| 11004 | G10 | 2748  | 7727      | ZNF174   | -0.0060 | 0.9863 |
| 11024 | H04 | 9465  | 9725      | TMEM63A  | -0.0060 | 0.9863 |
| 51028 | G08 | 56193 | 54453     | RIN2     | -0.0060 | 0.9863 |
| 11061 | F10 | 2927  | 7108      | TM7SF2   | -0.0060 | 0.9863 |
| 31040 | D04 | 9699  | 55216     | C11orf57 | -0.0060 | 0.9863 |
| 11004 | F11 | 8639  | 10616     | RBCK1    | -0.0060 | 0.9864 |
| 11010 | H10 | 5393  | 10587     | TXNRD2   | -0.0059 | 0.9864 |
| 11089 | E02 | 2094  | 7189      | TRAF6    | -0.0059 | 0.9864 |
| 31006 | D07 | 11066 | 23373     | CRTC1    | -0.0059 | 0.9864 |
| 51028 | C04 | 55310 | 949       | SCARB1   | -0.0059 | 0.9864 |
| 31003 | A04 | 10517 | 196513    | DCP1B    | -0.0059 | 0.9864 |
| 51020 | D11 | 56334 | 84986     | ARHGAP19 | -0.0059 | 0.9865 |
| 11075 | A12 | 5210  | 3669      | ISG20    | -0.0059 | 0.9865 |
| 31042 | B03 | 6351  | 55168     | MRPS18A  | -0.0059 | 0.9865 |
| 11078 | H05 | 5875  | 3030      | HADHA    | -0.0059 | 0.9866 |
| 31007 | H06 | 11187 | 152185    | CCDC52   | -0.0059 | 0.9866 |
| 51025 | C04 | 55705 | 607       | BCL9     | -0.0058 | 0.9866 |
| 51020 | H09 | 56038 | 255403    | ZNF718   | -0.0058 | 0.9867 |
| 51026 | B10 | 53393 | 9581      | PREPL    | -0.0058 | 0.9867 |
| 51003 | C05 | 52661 | 917       | CD3G     | -0.0058 | 0.9867 |

|       |     |       |        |            |         |        |
|-------|-----|-------|--------|------------|---------|--------|
| 51003 | B05 | 52746 | 7499   | XG         | -0.0058 | 0.9867 |
| 31008 | F02 | 11527 | 130560 | SPATA3     | -0.0058 | 0.9867 |
| 11001 | F06 | 9392  | 643406 | LOC643406  | -0.0058 | 0.9867 |
| 31011 | G02 | 11661 | 5871   | MAP4K2     | -0.0058 | 0.9868 |
| 11017 | B11 | 6934  | 24146  | CLDN15     | -0.0058 | 0.9868 |
| 11013 | D03 | 6655  | 56926  | NCLN       | -0.0057 | 0.9869 |
| 31008 | C01 | 11399 | 170685 | NUDT10     | -0.0057 | 0.9869 |
| 31026 | C01 | 14078 | 1473   | CST5       | -0.0057 | 0.9869 |
| 11016 | G06 | 6704  | 23710  | GABARAPL1  | -0.0057 | 0.9870 |
| 31038 | B09 | 5857  | 54478  | FAM64A     | -0.0057 | 0.9870 |
| 11008 | A02 | 366   | 10055  | SAE1       | -0.0057 | 0.9870 |
| 11037 | B01 | 5375  | 10381  | TUBB3      | -0.0057 | 0.9871 |
| 11037 | E12 | 3803  | 3359   | HTR3A      | -0.0056 | 0.9871 |
| 51025 | D10 | 56914 | 6900   | CNTN2      | -0.0056 | 0.9871 |
| 11030 | E11 | 3716  | 55374  | TMCO6      | -0.0056 | 0.9872 |
| 11052 | H03 | 4728  | 10921  | RNPS1      | -0.0056 | 0.9872 |
| 51003 | G03 | 52643 | 339168 | TMEM95     | -0.0056 | 0.9872 |
| 11015 | B05 | 9008  | 8821   | INPP4B     | -0.0056 | 0.9872 |
| 51002 | D07 | 52960 | 378832 | NCRNA00175 | -0.0056 | 0.9872 |
| 51031 | G10 | 56538 | 23252  | OTUD3      | -0.0056 | 0.9873 |
| 51002 | G03 | 52580 | 80069  | C6orf208   | -0.0056 | 0.9873 |
| 51030 | F12 | 56498 | 5644   | PRSS1      | -0.0055 | 0.9873 |
| 51006 | A10 | 53452 | 5745   | PTH1R      | -0.0055 | 0.9874 |
| 11055 | B10 | 243   | 64087  | MCCC2      | -0.0055 | 0.9874 |
| 31027 | F05 | 13931 | 1576   | CYP3A4     | -0.0055 | 0.9874 |
| 11047 | C08 | 8732  | 22889  | KIAA0907   | -0.0055 | 0.9874 |
| 11004 | E07 | 8227  | 255043 | TMEM86B    | -0.0055 | 0.9874 |
| 31007 | F05 | 10944 | 55159  | RFWD3      | -0.0055 | 0.9875 |
| 51011 | C10 | 55081 | 58538  | MPP4       | -0.0055 | 0.9875 |
| 31040 | F10 | 2459  | 63922  | CHTF18     | -0.0055 | 0.9875 |
| 11078 | H10 | 1343  | 2059   | EPS8       | -0.0054 | 0.9876 |
| 51001 | D02 | 52589 | 337974 | KRTAP19-7  | -0.0054 | 0.9877 |
| 11066 | F05 | 6724  | 113730 | KLHDC7B    | -0.0053 | 0.9878 |
| 31005 | F07 | 11292 | 84935  | C13orf33   | -0.0053 | 0.9878 |
| 11047 | E10 | 841   | 64108  | RTP4       | -0.0053 | 0.9878 |
| 11035 | C10 | 3162  | 3608   | ILF2       | -0.0053 | 0.9878 |
| 11082 | A08 | 3961  | 4282   | MIF        | -0.0053 | 0.9878 |
| 31040 | E10 | 2581  | 200424 | TET3       | -0.0053 | 0.9878 |
| 31024 | F07 | 13686 | 219855 | SLC37A2    | -0.0053 | 0.9878 |
| 51002 | F06 | 52809 | 148930 | KNCN       | -0.0053 | 0.9878 |
| 11002 | B07 | 9235  | 26748  | GAGE12I    | -0.0053 | 0.9879 |
| 51011 | F06 | 54871 | 9108   | MTMR7      | -0.0053 | 0.9880 |
| 11043 | A02 | 6402  | 29103  | DNAJC15    | -0.0052 | 0.9880 |
| 31040 | G02 | 1905  | 64147  | KIF9       | -0.0052 | 0.9880 |

|       |     |       |        |           |         |        |
|-------|-----|-------|--------|-----------|---------|--------|
| 31013 | E12 | 11917 | 9209   | LRRFIP2   | -0.0052 | 0.9881 |
| 11046 | G04 | 1033  | 79879  | CCDC134   | -0.0052 | 0.9881 |
| 11076 | B02 | 5237  | 1327   | COX4I1    | -0.0052 | 0.9882 |
| 11077 | H08 | 4353  | 9685   | CLINT1    | -0.0052 | 0.9882 |
| 11049 | D08 | 91    | 10098  | TSPAN5    | -0.0051 | 0.9882 |
| 31024 | B07 | 13555 | 55240  | STEAP3    | -0.0051 | 0.9882 |
| 11044 | A05 | 2742  | 29057  | FAM156A   | -0.0051 | 0.9882 |
| 51013 | C07 | 52971 | 55633  | TBC1D22B  | -0.0051 | 0.9883 |
| 51025 | C11 | 56286 | 161497 | STRC      | -0.0051 | 0.9883 |
| 11060 | C10 | 5759  | 3646   | EIF3E     | -0.0051 | 0.9883 |
| 31033 | B07 | 14889 | 387036 | GUSBL1    | -0.0051 | 0.9884 |
| 31039 | C09 | 1171  | 27289  | RND1      | -0.0051 | 0.9884 |
| 11019 | A02 | 3594  | 9145   | SYNGR1    | -0.0051 | 0.9884 |
| 11061 | G06 | 2751  | 64425  | POLR1E    | -0.0051 | 0.9884 |
| 11007 | A03 | 8043  | 84524  | ZC3H8     | -0.0051 | 0.9884 |
| 11071 | B10 | 9998  | 4599   | MX1       | -0.0050 | 0.9885 |
| 11037 | D10 | 6435  | 29106  | SCG3      | -0.0050 | 0.9885 |
| 31032 | D09 | 14787 | 79839  | CCDC102B  | -0.0050 | 0.9886 |
| 51027 | A08 | 55428 | 81608  | FIP1L1    | -0.0050 | 0.9886 |
| 11039 | A08 | 6820  | 7086   | TKT       | -0.0050 | 0.9886 |
| 11046 | E06 | 4320  | 55906  | ZC4H2     | -0.0050 | 0.9886 |
| 11059 | C09 | 2730  | 1604   | CD55      | -0.0050 | 0.9886 |
| 51023 | B04 | 56692 | 9958   | USP15     | -0.0050 | 0.9886 |
| 11015 | F02 | 5713  | 140823 | ROMO1     | -0.0049 | 0.9887 |
| 11035 | A01 | 6521  | 51112  | TTC15     | -0.0049 | 0.9888 |
| 11063 | E03 | 5145  | 51540  | SCLY      | -0.0049 | 0.9888 |
| 31001 | A05 | 10539 | 92675  | DTD1      | -0.0049 | 0.9888 |
| 51028 | C11 | 56798 | 146760 | RTN4RL1   | -0.0049 | 0.9888 |
| 51030 | D08 | 53210 | 440321 | FLJ32679  | -0.0049 | 0.9889 |
| 11082 | G03 | 3228  | 83658  | DYNLRB1   | -0.0048 | 0.9890 |
| 11052 | A01 | 1986  | 4969   | OGN       | -0.0048 | 0.9890 |
| 11025 | H04 | 9532  | 5933   | RBL1      | -0.0048 | 0.9890 |
| 31006 | H07 | 11317 | 9295   | SRSF11    | -0.0048 | 0.9890 |
| 11013 | E01 | 4079  | 3329   | HSPD1     | -0.0048 | 0.9890 |
| 11078 | G02 | 6203  | 51361  | HOOK1     | -0.0048 | 0.9890 |
| 51014 | B11 | 52812 | 80320  | SP6       | -0.0048 | 0.9890 |
| 11007 | D06 | 8245  | 145226 | RDH12     | -0.0048 | 0.9890 |
| 11051 | D09 | 1063  | 6607   | SMN2      | -0.0048 | 0.9891 |
| 31021 | E03 | 12885 | 845    | CASQ2     | -0.0048 | 0.9891 |
| 51027 | C04 | 56818 | 163351 | GBP6      | -0.0048 | 0.9891 |
| 11016 | F06 | 5559  | 10289  | EIF1B     | -0.0048 | 0.9891 |
| 51013 | B12 | 52764 | 153201 | SLC36A2   | -0.0048 | 0.9891 |
| 11020 | F04 | 3633  | 51637  | C14orf166 | -0.0048 | 0.9891 |
| 11066 | D11 | 9651  | 284004 | HEXDC     | -0.0047 | 0.9891 |

|       |     |       |        |           |         |        |
|-------|-----|-------|--------|-----------|---------|--------|
| 51031 | H01 | 53205 | 399665 | FAM102A   | -0.0047 | 0.9892 |
| 11048 | H07 | 180   | 23548  | TTC33     | -0.0047 | 0.9892 |
| 51002 | F11 | 56735 | 254956 | MORN5     | -0.0047 | 0.9893 |
| 11005 | H07 | 2001  | 202134 | FAM153B   | -0.0047 | 0.9893 |
| 31010 | B11 | 11674 | 55614  | KIF16B    | -0.0047 | 0.9893 |
| 51012 | C02 | 53105 | 144132 | DNHD1     | -0.0047 | 0.9893 |
| 11003 | A05 | 5654  | 5967   | REG1A     | -0.0047 | 0.9893 |
| 11015 | B10 | 8998  | 51095  | TRNT1     | -0.0047 | 0.9893 |
| 31029 | G01 | 14188 | 8334   | HIST1H2AC | -0.0046 | 0.9894 |
| 31039 | G06 | 2764  | 6742   | SSBP1     | -0.0046 | 0.9894 |
| 11018 | E02 | 6884  | 10245  | TIMM17B   | -0.0046 | 0.9894 |
| 11007 | A04 | 8207  | 293    | SLC25A6   | -0.0046 | 0.9895 |
| 11051 | E09 | 927   | 6817   | SULT1A1   | -0.0046 | 0.9895 |
| 51029 | G08 | 56786 | 51733  | UPB1      | -0.0046 | 0.9895 |
| 11039 | A12 | 1925  | 399694 | SHC4      | -0.0046 | 0.9896 |
| 11053 | D03 | 360   | 23172  | FAM175B   | -0.0046 | 0.9896 |
| 51029 | B09 | 53279 | 80714  | PBX4      | -0.0045 | 0.9896 |
| 11002 | C04 | 9783  | 563    | AZGP1     | -0.0045 | 0.9896 |
| 11035 | B03 | 6365  | 528    | ATP6V1C1  | -0.0045 | 0.9896 |
| 51003 | G07 | 56711 | 386682 | KRTAP10-3 | -0.0045 | 0.9896 |
| 31044 | E02 | 4823  | 55897  | MESP1     | -0.0045 | 0.9896 |
| 11021 | A01 | 5742  | 2205   | FCER1A    | -0.0045 | 0.9896 |
| 51005 | G01 | 54745 | 6555   | SLC10A2   | -0.0045 | 0.9896 |
| 11078 | F01 | 2179  | 9915   | ARNT2     | -0.0045 | 0.9897 |
| 11076 | B05 | 3930  | 7024   | TFCP2     | -0.0045 | 0.9897 |
| 11067 | F02 | 8222  | 1543   | CYP1A1    | -0.0045 | 0.9897 |
| 51032 | G05 | 56474 | 282969 | C10orf125 | -0.0045 | 0.9898 |
| 51020 | C09 | 56176 | 65056  | GPBP1     | -0.0045 | 0.9898 |
| 31043 | H03 | 7817  | 55311  | ZNF444    | -0.0044 | 0.9898 |
| 51033 | F02 | 55467 | 165679 | C3orf57   | -0.0044 | 0.9899 |
| 11057 | F10 | 7252  | 407    | ARR3      | -0.0044 | 0.9899 |
| 31039 | B01 | 6509  | 83858  | ATAD3B    | -0.0044 | 0.9900 |
| 31007 | F04 | 11297 | 8626   | TP63      | -0.0044 | 0.9900 |
| 11058 | E07 | 8502  | 79442  | LRRC2     | -0.0043 | 0.9901 |
| 11069 | B12 | 2490  | 2239   | GPC4      | -0.0043 | 0.9901 |
| 11025 | C10 | 2420  | 8663   | EIF3C     | -0.0043 | 0.9901 |
| 11022 | F08 | 7853  | 91782  | CHMP7     | -0.0043 | 0.9902 |
| 31041 | A07 | 7316  | 115950 | ZNF653    | -0.0043 | 0.9902 |
| 11081 | C11 | 6528  | 259262 | SUGT1P    | -0.0043 | 0.9902 |
| 11078 | F02 | 6173  | 10664  | CTCF      | -0.0043 | 0.9902 |
| 31039 | H04 | 2871  | 2653   | GCSH      | -0.0043 | 0.9902 |
| 11058 | G05 | 4503  | 51438  | MAGEC2    | -0.0042 | 0.9903 |
| 11088 | G01 | 9925  | 58157  | NGB       | -0.0042 | 0.9904 |
| 51029 | F02 | 55423 | 4645   | MYO5B     | -0.0042 | 0.9904 |

|       |     |       |        |          |         |        |
|-------|-----|-------|--------|----------|---------|--------|
| 11028 | C12 | 8750  | 9265   | CYTH3    | -0.0042 | 0.9905 |
| 51014 | G11 | 52945 | 8536   | CAMK1    | -0.0042 | 0.9905 |
| 11054 | F07 | 162   | 54802  | TRIT1    | -0.0042 | 0.9905 |
| 11068 | G07 | 6535  | 92906  | HNRPLL   | -0.0041 | 0.9906 |
| 11024 | C09 | 4262  | 3326   | HSP90AB1 | -0.0041 | 0.9906 |
| 11008 | D01 | 2821  | 5635   | PRPSAP1  | -0.0041 | 0.9906 |
| 31043 | C07 | 7682  | 1039   | CDR2     | -0.0041 | 0.9906 |
| 51003 | G05 | 52646 | 7379   | UPK2     | -0.0041 | 0.9907 |
| 11073 | C06 | 8899  | 11100  | HNRNPUL1 | -0.0040 | 0.9908 |
| 11073 | A06 | 4140  | 28971  | C11orf67 | -0.0040 | 0.9908 |
| 51026 | C04 | 53259 | 84905  | ZNF341   | -0.0040 | 0.9909 |
| 31043 | D08 | 7868  | 84668  | FAM126A  | -0.0040 | 0.9909 |
| 31018 | G02 | 12839 | 3015   | H2AFZ    | -0.0040 | 0.9909 |
| 51001 | C03 | 52568 | 25774  | GSTTP1   | -0.0040 | 0.9909 |
| 11053 | G05 | 5924  | 813    | CALU     | -0.0040 | 0.9909 |
| 51032 | F10 | 55367 | 2681   | GGTA1    | -0.0039 | 0.9910 |
| 31041 | B03 | 7807  | 30012  | TLX3     | -0.0039 | 0.9911 |
| 51030 | E08 | 56942 | 23359  | FAM189A1 | -0.0039 | 0.9911 |
| 11060 | B07 | 3854  | 5036   | PA2G4    | -0.0039 | 0.9911 |
| 11035 | C04 | 6380  | 51375  | SNX7     | -0.0039 | 0.9912 |
| 11044 | A09 | 8979  | 85007  | AGXT2L2  | -0.0038 | 0.9912 |
| 31038 | B06 | 14409 | 65979  | PHACTR4  | -0.0038 | 0.9912 |
| 51023 | A03 | 56197 | 54627  | KIAA1383 | -0.0038 | 0.9912 |
| 31036 | F02 | 10642 | 54505  | DHX29    | -0.0038 | 0.9913 |
| 51023 | H07 | 56206 | 54726  | OTUD4    | -0.0038 | 0.9913 |
| 11006 | E05 | 8029  | 114049 | WBSCR22  | -0.0038 | 0.9913 |
| 31038 | H02 | 14686 | 26061  | HACL1    | -0.0038 | 0.9913 |
| 11066 | C04 | 9717  | 80308  | FLAD1    | -0.0038 | 0.9914 |
| 31006 | G03 | 10879 | 3344   | FOXN2    | -0.0037 | 0.9914 |
| 11029 | H06 | 665   | 5716   | PSMD10   | -0.0037 | 0.9914 |
| 31007 | H05 | 10868 | 84456  | L3MBTL3  | -0.0037 | 0.9914 |
| 11062 | E02 | 1286  | 23208  | SYT11    | -0.0037 | 0.9914 |
| 11037 | H11 | 9545  | 54946  | SLC41A3  | -0.0037 | 0.9915 |
| 11012 | B01 | 4544  | 10856  | RUVBL2   | -0.0037 | 0.9915 |
| 11020 | F03 | 7640  | 962    | CD48     | -0.0037 | 0.9916 |
| 11080 | E11 | 5228  | 5336   | PLCG2    | -0.0037 | 0.9916 |
| 51022 | F05 | 56665 | 79400  | NOX5     | -0.0037 | 0.9916 |
| 31040 | D10 | 10152 | 222484 | LNX2     | -0.0037 | 0.9916 |
| 11025 | F03 | 9988  | 8615   | USO1     | -0.0037 | 0.9916 |
| 51027 | H11 | 1545  | 163050 | ZNF564   | -0.0036 | 0.9917 |
| 11024 | H11 | 5104  | 5211   | PFKL     | -0.0036 | 0.9917 |
| 11048 | H06 | 151   | 10927  | SPIN1    | -0.0036 | 0.9917 |
| 11050 | A03 | 4218  | 79696  | FAM164C  | -0.0036 | 0.9917 |
| 31017 | B05 | 12907 | 23767  | FLRT3    | -0.0036 | 0.9917 |

|       |     |       |        |          |         |        |
|-------|-----|-------|--------|----------|---------|--------|
| 11006 | D12 | 9309  | 51267  | CLEC1A   | -0.0036 | 0.9918 |
| 11017 | B09 | 6375  | 63931  | MRPS14   | -0.0036 | 0.9918 |
| 11041 | A01 | 874   | 130340 | AP1S3    | -0.0036 | 0.9918 |
| 31033 | C07 | 14955 | 3206   | HOXA10   | -0.0035 | 0.9920 |
| 11016 | G08 | 3817  | 1978   | EIF4EBP1 | -0.0035 | 0.9920 |
| 11002 | E10 | 9943  | 1139   | CHRNA7   | -0.0035 | 0.9920 |
| 11088 | C06 | 10017 | 10193  | RNF41    | -0.0035 | 0.9920 |
| 11035 | G01 | 2227  | 7050   | TGIF1    | -0.0035 | 0.9920 |
| 11029 | A02 | 1843  | 1027   | CDKN1B   | -0.0035 | 0.9920 |
| 51003 | C01 | 52604 | 123904 | NRN1L    | -0.0034 | 0.9921 |
| 11014 | H10 | 2706  | 9670   | IPO13    | -0.0034 | 0.9921 |
| 11009 | F04 | 258   | 51631  | LUC7L2   | -0.0034 | 0.9922 |
| 11030 | D03 | 6768  | 7529   | YWHAB    | -0.0034 | 0.9922 |
| 11076 | B01 | 5422  | 382    | ARF6     | -0.0034 | 0.9923 |
| 31022 | H01 | 13333 | 64663  | SPANXC   | -0.0034 | 0.9923 |
| 31042 | H09 | 5761  | 3183   | HNRNPC   | -0.0034 | 0.9923 |
| 11055 | A03 | 8119  | 27092  | CACNG4   | -0.0034 | 0.9923 |
| 11005 | H06 | 4075  | 3029   | HAGH     | -0.0034 | 0.9923 |
| 11087 | F02 | 9823  | 1363   | CPE      | -0.0033 | 0.9923 |
| 11054 | C08 | 3975  | 3178   | HNRNPA1  | -0.0033 | 0.9923 |
| 51023 | H06 | 55889 | 3416   | IDE      | -0.0033 | 0.9924 |
| 11067 | C06 | 2065  | 734    | OSGIN2   | -0.0033 | 0.9924 |
| 11052 | D05 | 4038  | 10450  | PPIE     | -0.0033 | 0.9924 |
| 11035 | G05 | 6777  | 79142  | PHF23    | -0.0033 | 0.9924 |
| 11020 | C03 | 7273  | 27040  | LAT      | -0.0033 | 0.9925 |
| 11051 | G11 | 4175  | 931    | MS4A1    | -0.0033 | 0.9925 |
| 11084 | E11 | 645   | 8799   | PEX11B   | -0.0033 | 0.9925 |
| 11018 | H01 | 7165  | 29104  | N6AMT1   | -0.0033 | 0.9925 |
| 51022 | A05 | 55884 | 6564   | SLC15A1  | -0.0033 | 0.9925 |
| 31005 | H09 | 10842 | 9586   | CREB5    | -0.0032 | 0.9925 |
| 31003 | E08 | 10362 | 9886   | RHOBTB1  | -0.0032 | 0.9926 |
| 11009 | A10 | 4963  | 10120  | ACTR1B   | -0.0032 | 0.9926 |
| 11074 | A05 | 3875  | 103910 | MYL12B   | -0.0032 | 0.9926 |
| 11050 | E11 | 5442  | 6495   | SIX1     | -0.0032 | 0.9926 |
| 31025 | C06 | 13329 | 57020  | C16orf62 | -0.0032 | 0.9927 |
| 11086 | H01 | 57    | 10067  | SCAMP3   | -0.0031 | 0.9928 |
| 11036 | D12 | 3586  | 1643   | DDB2     | -0.0031 | 0.9928 |
| 31042 | F09 | 5833  | 56912  | IFT46    | -0.0031 | 0.9928 |
| 11085 | H07 | 123   | 64114  | TMBIM1   | -0.0031 | 0.9929 |
| 11018 | E10 | 7778  | 202865 | C7orf33  | -0.0031 | 0.9930 |
| 31044 | C06 | 3542  | 6510   | SLC1A5   | -0.0031 | 0.9930 |
| 31014 | H07 | 12318 | 79065  | ATG9A    | -0.0030 | 0.9930 |
| 51032 | B11 | 55458 | 389541 | C7orf59  | -0.0030 | 0.9931 |
| 31043 | F01 | 5871  | 3032   | HADHB    | -0.0030 | 0.9931 |

|       |     |       |        |           |         |        |
|-------|-----|-------|--------|-----------|---------|--------|
| 31032 | C01 | 14627 | 59342  | SCPEP1    | -0.0030 | 0.9931 |
| 31032 | F04 | 14498 | 114990 | VASN      | -0.0030 | 0.9931 |
| 11064 | C11 | 9939  | 2516   | NR5A1     | -0.0030 | 0.9931 |
| 11020 | G03 | 3291  | 2963   | GTF2F2    | -0.0030 | 0.9931 |
| 11058 | C09 | 10048 | 374354 | NHLRC2    | -0.0030 | 0.9931 |
| 51011 | H02 | 52983 | 7053   | TGM3      | -0.0029 | 0.9932 |
| 11079 | A12 | 4470  | 47     | ACLY      | -0.0029 | 0.9933 |
| 51029 | E11 | 55362 | 53836  | GPR87     | -0.0029 | 0.9933 |
| 51027 | B07 | 53387 | 54800  | KLHL24    | -0.0029 | 0.9933 |
| 31028 | E05 | 14150 | 11160  | ERLIN2    | -0.0029 | 0.9933 |
| 11054 | A04 | 5176  | 4157   | MC1R      | -0.0029 | 0.9933 |
| 31041 | H01 | 7618  | 64897  | C12orf43  | -0.0029 | 0.9933 |
| 31013 | B04 | 11864 | 8576   | STK16     | -0.0029 | 0.9933 |
| 11079 | E06 | 2960  | 5775   | PTPN4     | -0.0029 | 0.9934 |
| 11072 | F03 | 2544  | 22893  | BAHD1     | -0.0029 | 0.9934 |
| 11048 | A04 | 1170  | 11248  | NXPH3     | -0.0029 | 0.9934 |
| 31010 | E03 | 11709 | 10043  | TOM1      | -0.0028 | 0.9935 |
| 51024 | E06 | 56335 | 10499  | NCOA2     | -0.0028 | 0.9935 |
| 11029 | C01 | 42    | 5861   | RAB1A     | -0.0028 | 0.9935 |
| 11043 | D10 | 5119  | 84984  | C3orf34   | -0.0028 | 0.9936 |
| 31022 | F03 | 13764 | 219855 | SLC37A2   | -0.0028 | 0.9936 |
| 11045 | E11 | 297   | 22931  | RAB18     | -0.0028 | 0.9937 |
| 11009 | H03 | 7189  | 26580  | BSCL2     | -0.0028 | 0.9937 |
| 11078 | A03 | 1393  | 29110  | TBK1      | -0.0027 | 0.9938 |
| 11068 | E08 | 6798  | 22823  | MTF2      | -0.0027 | 0.9938 |
| 11001 | G09 | 10178 | 27296  | TP53TG5   | -0.0027 | 0.9938 |
| 11068 | C11 | 7254  | 84879  | MFSD2A    | -0.0027 | 0.9938 |
| 31001 | G04 | 10579 | 219621 | C10orf107 | -0.0027 | 0.9938 |
| 11036 | F09 | 7961  | 5701   | PSMC2     | -0.0027 | 0.9939 |
| 11062 | F10 | 7896  | 84872  | ZC3H10    | -0.0027 | 0.9939 |
| 11037 | C01 | 6731  | 90204  | ZSWIM1    | -0.0026 | 0.9939 |
| 11037 | G02 | 3411  | 7067   | THRA      | -0.0026 | 0.9940 |
| 11055 | E08 | 5217  | 10826  | C5orf4    | -0.0026 | 0.9940 |
| 11024 | F02 | 4970  | 9091   | PIGQ      | -0.0026 | 0.9940 |
| 11004 | D05 | 2959  | 7570   | ZNF22     | -0.0026 | 0.9940 |
| 11075 | F04 | 4422  | 1827   | RCAN1     | -0.0026 | 0.9940 |
| 11018 | C10 | 7629  | 4818   | NKG7      | -0.0026 | 0.9941 |
| 31017 | H04 | 13266 | 213    | ALB       | -0.0026 | 0.9941 |
| 11040 | E06 | 5182  | 80154  | LOC80154  | -0.0026 | 0.9941 |
| 11049 | E08 | 6021  | 84934  | C12orf52  | -0.0026 | 0.9941 |
| 51026 | G02 | 56855 | 57616  | TSHZ3     | -0.0025 | 0.9942 |
| 31040 | A05 | 10063 | 132321 | C4orf33   | -0.0025 | 0.9942 |
| 31007 | C02 | 11172 | 125950 | RAVER1    | -0.0025 | 0.9942 |
| 11005 | C11 | 2685  | 25840  | METTL7A   | -0.0025 | 0.9942 |

|       |     |       |        |           |         |        |
|-------|-----|-------|--------|-----------|---------|--------|
| 11068 | C06 | 1571  | 10693  | CCT6B     | -0.0025 | 0.9943 |
| 51023 | F02 | 56685 | 4547   | MTPP      | -0.0025 | 0.9943 |
| 11035 | G09 | 1261  | 5305   | PIP4K2A   | -0.0025 | 0.9944 |
| 31032 | F11 | 14758 | 256281 | NUDT14    | -0.0025 | 0.9944 |
| 51013 | H02 | 54028 | 81789  | TIGD6     | -0.0024 | 0.9944 |
| 11088 | C08 | 2968  | 54776  | PPP1R12C  | -0.0024 | 0.9944 |
| 51012 | A11 | 53012 | 5058   | PAK1      | -0.0024 | 0.9945 |
| 11039 | A01 | 5207  | 28976  | ACAD9     | -0.0024 | 0.9945 |
| 11007 | E06 | 8516  | 283238 | SLC22A24  | -0.0024 | 0.9946 |
| 31017 | H11 | 13299 | 400713 | ZNF880    | -0.0024 | 0.9946 |
| 51014 | C10 | 52719 | 10887  | PROKR1    | -0.0024 | 0.9946 |
| 11059 | H11 | 372   | 84129  | ACAD11    | -0.0023 | 0.9946 |
| 11043 | F06 | 3133  | 513    | ATP5D     | -0.0023 | 0.9947 |
| 11086 | F02 | 7017  | 10681  | GNB5      | -0.0023 | 0.9947 |
| 11069 | A04 | 6335  | 54873  | PALMD     | -0.0023 | 0.9947 |
| 11084 | D06 | 6709  | 7314   | UBB       | -0.0023 | 0.9947 |
| 11041 | G05 | 6377  | 8341   | HIST1H2BN | -0.0023 | 0.9948 |
| 51003 | C11 | 53006 | 146712 | B3GNTL1   | -0.0023 | 0.9948 |
| 31044 | B10 | 596   | 4116   | MAGOH     | -0.0023 | 0.9948 |
| 51021 | H06 | 56800 | 123876 | ACSM2A    | -0.0022 | 0.9949 |
| 51027 | G04 | 13972 | 79977  | GRHL2     | -0.0022 | 0.9949 |
| 51018 | E03 | 56721 | 1401   | CRP       | -0.0022 | 0.9949 |
| 11063 | A03 | 9452  | 11026  | LILRA3    | -0.0022 | 0.9949 |
| 51013 | A12 | 53130 | 7059   | THBS3     | -0.0022 | 0.9949 |
| 11009 | C05 | 5914  | 1152   | CKB       | -0.0022 | 0.9950 |
| 11016 | C07 | 9153  | 25945  | PVRL3     | -0.0022 | 0.9951 |
| 11034 | F10 | 2554  | 64092  | SAMSN1    | -0.0021 | 0.9951 |
| 51017 | A09 | 56434 | 158983 | H2BFWT    | -0.0021 | 0.9952 |
| 31004 | E07 | 11303 | 6837   | MED22     | -0.0021 | 0.9952 |
| 11071 | G01 | 10004 | 166614 | DCLK2     | -0.0021 | 0.9953 |
| 51016 | E04 | 56128 | 337875 | HIST2H2BA | -0.0021 | 0.9953 |
| 51026 | B02 | 53365 | 126859 | C1orf125  | -0.0020 | 0.9953 |
| 31019 | F11 | 12979 | 131965 | METTL6    | -0.0020 | 0.9953 |
| 51033 | A08 | 54423 | 6355   | CCL8      | -0.0020 | 0.9953 |
| 51016 | E03 | 55631 | 6588   | SLN       | -0.0020 | 0.9953 |
| 51011 | G01 | 54287 | 79745  | CLIP4     | -0.0020 | 0.9954 |
| 11073 | C09 | 4344  | 83877  | TM2D2     | -0.0020 | 0.9954 |
| 51011 | A08 | 52990 | 221178 | SPATA13   | -0.0020 | 0.9954 |
| 51004 | A03 | 52799 | 164395 | TTLL9     | -0.0020 | 0.9954 |
| 11018 | H03 | 3617  | 10550  | ARL6IP5   | -0.0020 | 0.9955 |
| 11056 | B02 | 2768  | 55839  | CENPN     | -0.0020 | 0.9955 |
| 31008 | A08 | 11702 | 388407 | C17orf82  | -0.0019 | 0.9955 |
| 51003 | B08 | 54611 | 282617 | IL28B     | -0.0019 | 0.9956 |
| 11073 | A08 | 8810  | 10013  | HDAC6     | -0.0019 | 0.9956 |



|       |     |       |        |          |         |        |
|-------|-----|-------|--------|----------|---------|--------|
| 11078 | G09 | 8788  | 57679  | ALS2     | -0.0019 | 0.9957 |
| 51013 | G02 | 54794 | 90665  | TBL1Y    | -0.0019 | 0.9957 |
| 11075 | B03 | 4393  | 6201   | RPS7     | -0.0019 | 0.9957 |
| 51004 | E11 | 56564 | 9016   | SLC25A14 | -0.0019 | 0.9957 |
| 11039 | F02 | 8127  | 7704   | ZBTB16   | -0.0019 | 0.9957 |
| 51004 | G07 | 53812 | 128387 | TATDN3   | -0.0019 | 0.9957 |
| 11014 | H09 | 455   | 9181   | ARHGEF2  | -0.0019 | 0.9957 |
| 31031 | A04 | 14542 | 80097  | MZT2B    | -0.0018 | 0.9958 |
| 11030 | C03 | 3993  | 5689   | PSMB1    | -0.0018 | 0.9958 |
| 11018 | E06 | 6883  | 10772  | SRSF10   | -0.0018 | 0.9958 |
| 11001 | B07 | 9945  | 84948  | TIGD5    | -0.0018 | 0.9958 |
| 31019 | C07 | 13185 | NA     | NA       | -0.0018 | 0.9959 |
| 11026 | C09 | 8850  | 55182  | RNF220   | -0.0018 | 0.9959 |
| 11010 | H11 | 7595  | 2542   | SLC37A4  | -0.0018 | 0.9959 |
| 11029 | C02 | 2396  | 23593  | HEBP2    | -0.0018 | 0.9959 |
| 51013 | D02 | 52823 | 341359 | SYT10    | -0.0017 | 0.9960 |
| 11054 | D03 | 3805  | 7264   | TSTA3    | -0.0017 | 0.9960 |
| 31032 | E10 | 14735 | 4739   | NEDD9    | -0.0017 | 0.9960 |
| 51004 | F11 | 53955 | 9770   | RASSF2   | -0.0017 | 0.9961 |
| 11042 | F11 | 5677  | 9412   | MED21    | -0.0017 | 0.9961 |
| 31022 | E12 | 13585 | 53916  | RAB4B    | -0.0017 | 0.9961 |
| 51020 | G08 | 55718 | 5207   | PFKFB1   | -0.0017 | 0.9961 |
| 51005 | D09 | 55038 | 641371 | ACOT1    | -0.0017 | 0.9961 |
| 11076 | G11 | 4886  | 8767   | RIPK2    | -0.0017 | 0.9962 |
| 11085 | F09 | 6994  | 10237  | SLC35B1  | -0.0016 | 0.9963 |
| 11015 | H10 | 5521  | 9551   | ATP5J2   | -0.0016 | 0.9963 |
| 51018 | E10 | 55949 | 832    | CAPZB    | -0.0016 | 0.9964 |
| 11081 | E03 | 8826  | 51611  | DPH5     | -0.0016 | 0.9964 |
| 31006 | C07 | 11239 | 64747  | MFSD1    | -0.0016 | 0.9964 |
| 31015 | F08 | 12623 | 10945  | KDELR1   | -0.0016 | 0.9964 |
| 11016 | B05 | 7540  | 84661  | DPY30    | -0.0016 | 0.9964 |
| 11081 | F12 | 8753  | 79642  | ARSJ     | -0.0016 | 0.9964 |
| 11018 | D01 | 6336  | 4633   | MYL2     | -0.0016 | 0.9964 |
| 11001 | E01 | 3115  | 140735 | DYNLL2   | -0.0015 | 0.9964 |
| 11017 | F03 | 9091  | 55144  | LRRC8D   | -0.0015 | 0.9964 |
| 11047 | D11 | 4338  | 84272  | YIPF4    | -0.0015 | 0.9965 |
| 31021 | B06 | 13034 | 4055   | LTBR     | -0.0015 | 0.9965 |
| 11086 | A10 | 993   | 24145  | PANX1    | -0.0015 | 0.9966 |
| 51001 | F11 | 53037 | 9296   | ATP6V1F  | -0.0015 | 0.9967 |
| 31018 | B04 | 13136 | 137695 | TMEM68   | -0.0014 | 0.9967 |
| 11041 | F12 | 8056  | 29085  | PHPT1    | -0.0014 | 0.9967 |
| 11010 | C08 | 3834  | 59307  | SIGIRR   | -0.0014 | 0.9967 |
| 11010 | H09 | 3677  | NA     | NA       | -0.0014 | 0.9967 |
| 11057 | H08 | 4144  | 5467   | PPARD    | -0.0014 | 0.9967 |

|       |     |       |        |           |         |        |
|-------|-----|-------|--------|-----------|---------|--------|
| 31040 | F01 | 2043  | 25850  | ZNF345    | -0.0014 | 0.9967 |
| 11005 | B10 | 8465  | 146433 | IL34      | -0.0014 | 0.9968 |
| 31028 | D05 | 14171 | 11016  | ATF7      | -0.0014 | 0.9968 |
| 11047 | G04 | 2405  | 6426   | SRSF1     | -0.0014 | 0.9968 |
| 31042 | A01 | 4063  | 1438   | CSF2RA    | -0.0014 | 0.9968 |
| 31004 | E09 | 11011 | 6139   | RPL17     | -0.0014 | 0.9968 |
| 11010 | G02 | 6131  | 55663  | ZNF446    | -0.0014 | 0.9969 |
| 11026 | G02 | 2740  | 85236  | HIST1H2BK | -0.0014 | 0.9969 |
| 31033 | G03 | 14751 | 55536  | CDCA7L    | -0.0013 | 0.9969 |
| 11017 | C01 | 5912  | 25764  | C15orf63  | -0.0013 | 0.9970 |
| 11072 | C09 | 6060  | 5991   | RFX3      | -0.0013 | 0.9970 |
| 31013 | A05 | 12134 | 90557  | CCDC74A   | -0.0013 | 0.9970 |
| 11026 | G03 | 8379  | 140290 | TCP10L    | -0.0013 | 0.9970 |
| 51013 | F04 | 53651 | 79718  | TBL1XR1   | -0.0013 | 0.9971 |
| 31005 | E04 | 11259 | 11270  | NRM       | -0.0013 | 0.9971 |
| 31007 | C01 | 11298 | 64446  | DNAI2     | -0.0013 | 0.9971 |
| 11025 | C06 | 1884  | 3981   | LIG4      | -0.0013 | 0.9971 |
| 11076 | G04 | 4427  | 23155  | CLCC1     | -0.0013 | 0.9971 |
| 11032 | F01 | 1421  | 84692  | CCDC54    | -0.0013 | 0.9971 |
| 11034 | E02 | 9342  | 222389 | BEND7     | -0.0013 | 0.9971 |
| 11038 | G01 | 2003  | 6529   | SLC6A1    | -0.0012 | 0.9972 |
| 31006 | H10 | 11132 | 29924  | EPN1      | -0.0012 | 0.9972 |
| 11020 | G04 | 4992  | 51147  | ING4      | -0.0012 | 0.9972 |
| 31041 | E06 | 5438  | 471    | ATIC      | -0.0012 | 0.9973 |
| 11026 | B01 | 8283  | 284069 | FAM171A2  | -0.0012 | 0.9973 |
| 11043 | E11 | 7425  | 202374 | STK32A    | -0.0012 | 0.9973 |
| 51012 | B03 | 55222 | 54716  | SLC6A20   | -0.0012 | 0.9973 |
| 11005 | E08 | 63    | 114049 | WBSCR22   | -0.0012 | 0.9973 |
| 11001 | C03 | 9886  | 7979   | SHFM1     | -0.0011 | 0.9975 |
| 31018 | B02 | 13116 | 6289   | SAA2      | -0.0011 | 0.9975 |
| 11035 | H02 | 6300  | 635    | BHMT      | -0.0010 | 0.9977 |
| 31004 | E05 | 11086 | 27233  | SULT1C4   | -0.0010 | 0.9977 |
| 11071 | C05 | 1415  | 81616  | ACSBG2    | -0.0010 | 0.9977 |
| 31021 | G08 | 12834 | 4774   | NFIA      | -0.0010 | 0.9977 |
| 11010 | F11 | 4944  | 1267   | CNP       | -0.0010 | 0.9977 |
| 11027 | B10 | 4660  | 7164   | TPD52L1   | -0.0010 | 0.9978 |
| 31042 | E06 | 8030  | 79656  | BEND5     | -0.0010 | 0.9978 |
| 51029 | A12 | 55230 | 90864  | SPSB3     | -0.0010 | 0.9978 |
| 31018 | C10 | 13170 | 1588   | CYP19A1   | -0.0010 | 0.9978 |
| 31021 | F07 | 12927 | 54558  | SPATA6    | -0.0009 | 0.9978 |
| 11048 | E06 | 2778  | 11267  | SNF8      | -0.0009 | 0.9978 |
| 51011 | H06 | 53007 | 695    | BTK       | -0.0009 | 0.9978 |
| 11037 | C03 | 3497  | 2585   | GALK2     | -0.0009 | 0.9979 |
| 11003 | B08 | 5748  | 8076   | MFAP5     | -0.0009 | 0.9979 |

|       |     |       |        |          |         |        |
|-------|-----|-------|--------|----------|---------|--------|
| 11008 | B12 | 6687  | 51629  | SLC25A39 | -0.0009 | 0.9980 |
| 11021 | H07 | 3482  | 9184   | BUB3     | -0.0009 | 0.9980 |
| 11041 | H05 | 5850  | 966    | CD59     | -0.0009 | 0.9980 |
| 11049 | F12 | 1805  | 7050   | TGIF1    | -0.0009 | 0.9980 |
| 11064 | B03 | 8403  | 920    | CD4      | -0.0008 | 0.9981 |
| 31030 | G11 | 14198 | 25778  | DSTYK    | -0.0008 | 0.9981 |
| 11077 | C01 | 8420  | 212    | ALAS2    | -0.0008 | 0.9981 |
| 11077 | C05 | 2369  | 22908  | SACMIL   | -0.0008 | 0.9981 |
| 11044 | B01 | 8258  | 340419 | RSPO2    | -0.0008 | 0.9981 |
| 11046 | C01 | 3770  | 51329  | ARL6IP4  | -0.0008 | 0.9982 |
| 31015 | B04 | 12648 | 51021  | MRPS16   | -0.0008 | 0.9982 |
| 11072 | B02 | 3426  | 3295   | HSD17B4  | -0.0008 | 0.9983 |
| 31030 | B11 | 14374 | 6778   | STAT6    | -0.0008 | 0.9983 |
| 51032 | E12 | 55468 | 90639  | COX19    | -0.0008 | 0.9983 |
| 11081 | A02 | 9156  | 3915   | LAMC1    | -0.0007 | 0.9983 |
| 31037 | H11 | 15062 | 84264  | HAGHL    | -0.0007 | 0.9983 |
| 11007 | E09 | 7542  | 902    | CCNH     | -0.0007 | 0.9983 |
| 11017 | E10 | 7998  | 771    | CA12     | -0.0007 | 0.9983 |
| 11026 | F12 | 2734  | 8519   | IFITM1   | -0.0007 | 0.9983 |
| 31044 | C07 | 547   | 84126  | ATRIP    | -0.0007 | 0.9983 |
| 11062 | C11 | 9911  | 221476 | PI16     | -0.0007 | 0.9984 |
| 51006 | D08 | 55858 | 165530 | CLEC4F   | -0.0007 | 0.9984 |
| 31041 | B07 | 7716  | 3654   | IRAK1    | -0.0007 | 0.9984 |
| 11040 | H02 | 5542  | 344    | APOC2    | -0.0007 | 0.9985 |
| 11030 | F02 | 3664  | 5224   | PGAM2    | -0.0007 | 0.9985 |
| 11047 | F07 | 8536  | 627    | BDNF     | -0.0007 | 0.9985 |
| 11063 | G08 | 9731  | 10469  | TIMM44   | -0.0007 | 0.9985 |
| 51035 | A05 | 53680 | 7483   | WNT9A    | -0.0007 | 0.9985 |
| 11056 | C03 | 2786  | 2782   | GNB1     | -0.0007 | 0.9985 |
| 11080 | A11 | 2547  | 26148  | C10orf12 | -0.0006 | 0.9985 |
| 11002 | G11 | 5432  | 84191  | FAM96A   | -0.0006 | 0.9986 |
| 11076 | D09 | 969   | 9760   | TOX      | -0.0006 | 0.9986 |
| 11012 | H10 | 2383  | 51493  | C22orf28 | -0.0006 | 0.9986 |
| 11073 | D06 | 4212  | 10263  | CDK2AP2  | -0.0006 | 0.9986 |
| 11078 | G03 | 6553  | 85021  | REPS1    | -0.0006 | 0.9986 |
| 31044 | G01 | 4494  | 55829  | SELS     | -0.0005 | 0.9988 |
| 11056 | D03 | 5644  | 51478  | HSD17B7  | -0.0005 | 0.9988 |
| 51012 | B11 | 52694 | 169522 | KCNV2    | -0.0005 | 0.9989 |
| 11051 | B11 | 8603  | 49855  | SCAPER   | -0.0005 | 0.9989 |
| 11087 | F04 | 4780  | 2017   | CTTN     | -0.0005 | 0.9989 |
| 11057 | E12 | 10060 | 115294 | PCMTD1   | -0.0004 | 0.9990 |
| 51020 | C06 | 56319 | 9028   | RHBDL1   | -0.0004 | 0.9990 |
| 11006 | E09 | 651   | 7417   | VDAC2    | -0.0004 | 0.9991 |
| 11075 | G03 | 8700  | 91833  | WDR20    | -0.0004 | 0.9991 |

|       |     |       |        |           |         |        |
|-------|-----|-------|--------|-----------|---------|--------|
| 51013 | C08 | 53588 | 130132 | RFTN2     | -0.0004 | 0.9991 |
| 51023 | C12 | 56349 | 4897   | NRCAM     | -0.0004 | 0.9991 |
| 11038 | D12 | 6236  | 81566  | CSRNP2    | -0.0004 | 0.9991 |
| 11070 | A06 | 9725  | 51676  | ASB2      | -0.0004 | 0.9991 |
| 31002 | A09 | 10576 | 8976   | WASL      | -0.0004 | 0.9991 |
| 11026 | H08 | 3051  | 10581  | IFITM2    | -0.0004 | 0.9991 |
| 11059 | E04 | 1977  | 4886   | NPY1R     | -0.0004 | 0.9991 |
| 11074 | E10 | 1372  | 55222  | LRRC20    | -0.0004 | 0.9992 |
| 11085 | F11 | 7091  | 6618   | SNAPC2    | -0.0004 | 0.9992 |
| 11074 | B09 | 5773  | 374291 | NDUFS7    | -0.0004 | 0.9992 |
| 11037 | E05 | 9857  | 84920  | ALG10     | -0.0004 | 0.9992 |
| 11059 | A02 | 8366  | 4589   | MUC7      | -0.0003 | 0.9992 |
| 51001 | D06 | 54200 | 10141  | C4orf6    | -0.0003 | 0.9993 |
| 31003 | B05 | 10515 | 1272   | CNTN1     | -0.0003 | 0.9993 |
| 31029 | E11 | 14388 | 5739   | PTGIR     | -0.0003 | 0.9993 |
| 51014 | G10 | 52881 | 319101 | KRT73     | -0.0003 | 0.9994 |
| 11040 | B09 | 5131  | 84996  | C21orf119 | -0.0002 | 0.9995 |
| 31042 | B01 | 4231  | 79411  | GLB1L     | -0.0002 | 0.9995 |
| 51034 | A12 | 54065 | 26664  | OR7C1     | -0.0002 | 0.9995 |
| 31009 | C06 | 11755 | 22846  | VASH1     | -0.0002 | 0.9995 |
| 11072 | E04 | 3465  | 1601   | DAB2      | -0.0002 | 0.9995 |
| 51030 | B05 | 55527 | 55170  | PRMT6     | -0.0002 | 0.9996 |
| 51033 | D07 | 54622 | 387082 | SUMO4     | -0.0002 | 0.9996 |
| 11015 | A08 | 6111  | 6066   | RNU2-1    | -0.0002 | 0.9996 |
| 51023 | E11 | 55207 | 23236  | PLCB1     | -0.0001 | 0.9997 |
| 11012 | F02 | 5760  | 92747  | C20orf114 | -0.0001 | 0.9998 |
| 31007 | C07 | 10833 | 23528  | ZNF281    | -0.0001 | 0.9998 |
| 11049 | E11 | 615   | 3202   | HOXA5     | -0.0001 | 0.9998 |
| 51009 | C07 | 54896 | 57650  | KIAA1524  | -0.0001 | 0.9998 |
| 51031 | G03 | 56940 | 645104 | CLRN2     | -0.0001 | 0.9998 |
| 51034 | E08 | 54187 | 27020  | NPTN      | -0.0001 | 0.9998 |
| 51002 | H01 | 52631 | 6992   | PPP1R11   | -0.0001 | 0.9998 |
| 11088 | F10 | 340   | 7869   | SEMA3B    | -0.0001 | 0.9998 |
| 51017 | A11 | 56714 | 63904  | DUSP21    | 0.0000  | 0.9999 |
| 11066 | G11 | 1890  | 169270 | ZNF596    | 0.0000  | 0.9999 |
| 11042 | B10 | 8418  | 6366   | CCL21     | 0.0000  | 0.9999 |
| 51003 | F11 | 53212 | 54763  | ROPN1     | 0.0000  | 1.0000 |
| 31032 | H03 | 14646 | 57693  | ZNF317    | 0.0000  | 1.0000 |
| 31030 | A10 | 14421 | 60561  | RINT1     | 0.0000  | 1.0000 |
| 11049 | H01 | 1267  | 51277  | DNAJC27   | 0.0000  | 1.0001 |
| 11079 | D11 | 6465  | 9632   | SEC24C    | 0.0000  | 1.0001 |
| 11026 | G01 | 8200  | 123207 | C15orf40  | 0.0000  | 1.0001 |
| 11063 | F04 | 4956  | 5664   | PSEN2     | 0.0001  | 1.0001 |
| 11081 | B03 | 1917  | NA     | NA        | 0.0001  | 1.0002 |

|       |     |       |        |          |        |        |
|-------|-----|-------|--------|----------|--------|--------|
| 31012 | A04 | 12295 | 374882 | TMEM205  | 0.0001 | 1.0002 |
| 11078 | C03 | 6502  | 25902  | MTHFD1L  | 0.0001 | 1.0002 |
| 11045 | F07 | 102   | 5010   | CLDN11   | 0.0001 | 1.0002 |
| 11069 | B02 | 9652  | 79786  | KLHL36   | 0.0001 | 1.0002 |
| 11051 | C08 | 8970  | 64210  | MMS19    | 0.0001 | 1.0002 |
| 11027 | E08 | 8734  | 151516 | ASPRV1   | 0.0001 | 1.0002 |
| 31017 | A04 | 12803 | 9039   | UBA3     | 0.0001 | 1.0002 |
| 51002 | G11 | 52616 | 29934  | SNX12    | 0.0001 | 1.0003 |
| 31004 | C12 | 10991 | 128861 | C20orf71 | 0.0001 | 1.0003 |
| 51035 | B07 | 53911 | 285180 | RUFY4    | 0.0001 | 1.0003 |
| 11066 | B11 | 10065 | 7287   | TULP1    | 0.0002 | 1.0004 |
| 31032 | F06 | 14554 | 23051  | ZHX3     | 0.0002 | 1.0004 |
| 11071 | F06 | 7765  | 22895  | RPH3A    | 0.0002 | 1.0004 |
| 11002 | E05 | 5763  | 55850  | USE1     | 0.0002 | 1.0004 |
| 31014 | E08 | 11950 | 64860  | ARMCX5   | 0.0002 | 1.0005 |
| 31026 | G10 | 13863 | 7380   | UPK3A    | 0.0002 | 1.0005 |
| 31040 | A11 | 1960  | 7514   | XPO1     | 0.0002 | 1.0005 |
| 11027 | C12 | 8142  | 9019   | MPZL1    | 0.0003 | 1.0006 |
| 51010 | G10 | 52818 | 22987  | SV2C     | 0.0003 | 1.0006 |
| 11009 | B02 | 167   | 59     | ACTA2    | 0.0003 | 1.0006 |
| 11061 | G01 | 9492  | 144699 | FBXL14   | 0.0003 | 1.0007 |
| 51015 | B03 | 52732 | 27199  | OXGR1    | 0.0003 | 1.0007 |
| 31045 | H01 | 2691  | 92345  | NAF1     | 0.0003 | 1.0007 |
| 11021 | E06 | 5634  | 79366  | HMG5     | 0.0003 | 1.0007 |
| 11082 | G10 | 3275  | 51258  | MRPL51   | 0.0004 | 1.0008 |
| 11038 | C01 | 3371  | 219    | ALDH1B1  | 0.0004 | 1.0008 |
| 31042 | A05 | 6291  | 662    | BNIP1    | 0.0004 | 1.0009 |
| 31037 | C01 | 11843 | 7056   | THBD     | 0.0004 | 1.0009 |
| 11065 | H09 | 2541  | 1195   | CLK1     | 0.0004 | 1.0010 |
| 51003 | F12 | 52784 | 124912 | SPACA3   | 0.0004 | 1.0010 |
| 51009 | H01 | 53092 | 27255  | CNTN6    | 0.0004 | 1.0010 |
| 11028 | H09 | 3626  | 51545  | ZNF581   | 0.0004 | 1.0010 |
| 31040 | D08 | 8269  | 162989 | DEDD2    | 0.0004 | 1.0010 |
| 11085 | H08 | 9772  | 131474 | CHCHD4   | 0.0005 | 1.0011 |
| 11009 | A08 | 6015  | 4676   | NAP1L4   | 0.0005 | 1.0011 |
| 11005 | C01 | 2247  | 255193 | C19orf34 | 0.0005 | 1.0011 |
| 11024 | A05 | 3456  | 10533  | ATG7     | 0.0005 | 1.0012 |
| 11089 | B01 | 92    | 9121   | SLC16A5  | 0.0005 | 1.0012 |
| 11012 | F12 | 8499  | 79849  | PDZD3    | 0.0005 | 1.0012 |
| 11018 | E01 | 7949  | 51617  | HMP19    | 0.0005 | 1.0012 |
| 11009 | A12 | 328   | 92703  | TMEM183A | 0.0005 | 1.0013 |
| 11055 | F02 | 3951  | 79947  | DHDDS    | 0.0006 | 1.0013 |
| 51030 | B11 | 55472 | 23505  | TMEM131  | 0.0006 | 1.0013 |
| 11006 | F05 | 2032  | 84528  | RHOXF2   | 0.0006 | 1.0014 |

|       |     |       |        |          |        |        |
|-------|-----|-------|--------|----------|--------|--------|
| 11070 | H01 | 8247  | 3680   | ITGA9    | 0.0006 | 1.0014 |
| 51008 | E08 | 55174 | 3480   | IGF1R    | 0.0006 | 1.0015 |
| 31007 | E07 | 11284 | 10868  | USP20    | 0.0007 | 1.0015 |
| 51021 | D09 | 56402 | 57089  | ENTPD7   | 0.0007 | 1.0016 |
| 51001 | H03 | 52609 | 341947 | COX8C    | 0.0007 | 1.0016 |
| 51031 | D03 | 55412 | 118738 | ZNF488   | 0.0007 | 1.0017 |
| 11001 | G05 | 9237  | 145942 | TMCO5A   | 0.0007 | 1.0017 |
| 51023 | A12 | 53689 | 3635   | INPP5D   | 0.0008 | 1.0017 |
| 11005 | B05 | 2221  | 196472 | FAM71C   | 0.0008 | 1.0017 |
| 51035 | F10 | 54573 | 57093  | TRIM49   | 0.0008 | 1.0017 |
| 51034 | B05 | 55003 | 414318 | C9orf106 | 0.0008 | 1.0018 |
| 11061 | H01 | 5781  | 5672   | PSG4     | 0.0008 | 1.0018 |
| 51028 | C03 | 55633 | 50650  | ARHGEF3  | 0.0008 | 1.0018 |
| 51008 | E02 | 55218 | 3832   | KIF11    | 0.0008 | 1.0018 |
| 11041 | D02 | 8945  | 27086  | FOXP1    | 0.0008 | 1.0019 |
| 31007 | H10 | 11454 | 124773 | C17orf64 | 0.0008 | 1.0019 |
| 51009 | A10 | 54352 | 7049   | TGFBR3   | 0.0008 | 1.0019 |
| 11073 | C02 | 4648  | 3281   | HSBP1    | 0.0008 | 1.0019 |
| 31037 | F04 | 13483 | 115939 | C16orf42 | 0.0008 | 1.0020 |
| 11015 | D01 | 5783  | 5441   | POLR2L   | 0.0009 | 1.0020 |
| 11052 | C01 | 1075  | 136895 | C7orf31  | 0.0009 | 1.0020 |
| 11022 | G01 | 3238  | 8692   | HYAL2    | 0.0009 | 1.0020 |
| 11055 | E06 | 1561  | 493861 | EID3     | 0.0009 | 1.0020 |
| 51035 | C07 | 55093 | 54662  | TBC1D13  | 0.0009 | 1.0021 |
| 31043 | B09 | 7897  | 9440   | MED17    | 0.0009 | 1.0021 |
| 51031 | H04 | 55509 | 90864  | SPSB3    | 0.0009 | 1.0021 |
| 11044 | F04 | 3082  | 6141   | RPL18    | 0.0009 | 1.0021 |
| 11060 | A02 | 9308  | 254394 | MCM9     | 0.0009 | 1.0021 |
| 51029 | F08 | 56364 | 131    | ADH7     | 0.0009 | 1.0021 |
| 11024 | H06 | 9695  | 4175   | MCM6     | 0.0009 | 1.0022 |
| 11035 | A09 | 8510  | 56302  | TRPV5    | 0.0009 | 1.0022 |
| 51035 | A03 | 53998 | 147965 | FAM98C   | 0.0009 | 1.0022 |
| 51022 | B10 | 56214 | 7128   | TNFAIP3  | 0.0009 | 1.0022 |
| 51014 | G09 | 53081 | 138009 | DCAF4L2  | 0.0010 | 1.0022 |
| 11018 | G04 | 7108  | 5906   | RAP1A    | 0.0010 | 1.0022 |
| 31013 | A10 | 12063 | 51490  | C9orf114 | 0.0010 | 1.0022 |
| 11078 | A12 | 6570  | 93627  | TBCK     | 0.0010 | 1.0023 |
| 11085 | D02 | 481   | 794    | CALB2    | 0.0010 | 1.0023 |
| 11077 | A11 | 1544  | 5992   | RFX4     | 0.0010 | 1.0024 |
| 11083 | B10 | 7492  | 2512   | FTL      | 0.0010 | 1.0024 |
| 11004 | H03 | 705   | 997    | CDC34    | 0.0010 | 1.0024 |
| 31004 | D11 | 11274 | 140    | ADORA3   | 0.0010 | 1.0024 |
| 11053 | C06 | 1651  | 9659   | PDE4DIP  | 0.0010 | 1.0024 |
| 51030 | F01 | 55389 | 143458 | LDLRAD3  | 0.0011 | 1.0025 |

|       |     |       |        |           |        |        |
|-------|-----|-------|--------|-----------|--------|--------|
| 11016 | B03 | 6525  | 2768   | GNA12     | 0.0011 | 1.0025 |
| 11066 | A02 | 4755  | 9025   | RNF8      | 0.0011 | 1.0025 |
| 11066 | F04 | 10197 | 2046   | EPHA8     | 0.0011 | 1.0025 |
| 11067 | H08 | 1854  | 146562 | C16orf71  | 0.0011 | 1.0025 |
| 11067 | G07 | 2331  | 5144   | PDE4D     | 0.0011 | 1.0025 |
| 11045 | D07 | 2839  | 65117  | RSRC2     | 0.0011 | 1.0025 |
| 51009 | B11 | 54212 | 7099   | TLR4      | 0.0011 | 1.0026 |
| 31031 | B05 | 14510 | 220869 | CBWD5     | 0.0011 | 1.0026 |
| 11012 | D12 | 6863  | 25973  | PARS2     | 0.0012 | 1.0027 |
| 11022 | B06 | 7546  | 1901   | S1PR1     | 0.0012 | 1.0027 |
| 51012 | B12 | 54792 | 152405 | C3orf30   | 0.0012 | 1.0027 |
| 11052 | A08 | 8062  | 1775   | DNASE1L2  | 0.0012 | 1.0027 |
| 11046 | C03 | 2012  | 222662 | LHFPL5    | 0.0012 | 1.0027 |
| 31021 | F05 | 12880 | 64418  | TMEM168   | 0.0012 | 1.0028 |
| 11053 | A10 | 1312  | 150280 | HORMAD2   | 0.0012 | 1.0028 |
| 11074 | A03 | 4027  | 54949  | SDHAF2    | 0.0012 | 1.0028 |
| 51035 | H08 | 53663 | 342035 | GLDN      | 0.0012 | 1.0029 |
| 11046 | B10 | 6452  | 1977   | EIF4E     | 0.0012 | 1.0029 |
| 11001 | E12 | 377   | 4149   | MAX       | 0.0013 | 1.0029 |
| 51004 | B05 | 56023 | 729238 | SFTPA2    | 0.0013 | 1.0029 |
| 11077 | E05 | 95    | 5780   | PTPN9     | 0.0013 | 1.0030 |
| 11022 | G05 | 3422  | 5819   | PVRL2     | 0.0013 | 1.0031 |
| 51009 | B06 | 53987 | 79585  | CORO7     | 0.0013 | 1.0031 |
| 51022 | E07 | 55862 | 7783   | ZP2       | 0.0014 | 1.0031 |
| 11074 | E01 | 4477  | 689    | BTF3      | 0.0014 | 1.0031 |
| 11007 | B09 | 7519  | 9111   | NMI       | 0.0014 | 1.0032 |
| 11001 | B10 | 9571  | 225689 | MAPK15    | 0.0014 | 1.0032 |
| 51006 | G08 | 56417 | 374454 | KRT77     | 0.0014 | 1.0032 |
| 31023 | E06 | 13476 | 339230 | CCDC137   | 0.0014 | 1.0032 |
| 31005 | F12 | 11160 | 200316 | APOBEC3F  | 0.0014 | 1.0033 |
| 11006 | H03 | 8097  | 1687   | DFNA5     | 0.0014 | 1.0033 |
| 31030 | E03 | 14329 | 11221  | DUSP10    | 0.0014 | 1.0033 |
| 11075 | G07 | 4286  | 23648  | SSBP3     | 0.0014 | 1.0033 |
| 51031 | F07 | 56489 | 5542   | PRB1      | 0.0015 | 1.0034 |
| 51020 | C07 | 55809 | 2661   | GDF9      | 0.0015 | 1.0034 |
| 11004 | D06 | 6255  | 51014  | TMED7     | 0.0015 | 1.0034 |
| 51016 | E09 | 56782 | 285045 | LOC285045 | 0.0015 | 1.0035 |
| 11066 | A08 | 4610  | 79109  | MAPKAP1   | 0.0015 | 1.0035 |
| 11046 | H08 | 4500  | NA     | NA        | 0.0015 | 1.0035 |
| 11076 | F02 | 4104  | 7205   | TRIP6     | 0.0015 | 1.0035 |
| 11035 | D08 | 6278  | 80227  | PAAF1     | 0.0015 | 1.0036 |
| 11006 | B09 | 1231  | 358    | AQP1      | 0.0016 | 1.0036 |
| 11010 | D08 | 445   | 79576  | NKAP      | 0.0016 | 1.0036 |
| 31034 | A03 | 14930 | 23521  | RPL13A    | 0.0016 | 1.0036 |

|       |     |       |           |           |        |        |
|-------|-----|-------|-----------|-----------|--------|--------|
| 51021 | F11 | 56316 | 9422      | ZNF264    | 0.0016 | 1.0037 |
| 31008 | G01 | 11770 | 8545      | CGGBP1    | 0.0016 | 1.0037 |
| 51031 | D04 | 55352 | 55586     | MIOX      | 0.0016 | 1.0037 |
| 31041 | F01 | 7053  | 25796     | PGLS      | 0.0016 | 1.0037 |
| 51031 | A06 | 15067 | 5869      | RAB5B     | 0.0016 | 1.0037 |
| 31041 | D10 | 8973  | 332       | BIRC5     | 0.0016 | 1.0037 |
| 51011 | H01 | 52859 | 64753     | CCDC136   | 0.0016 | 1.0037 |
| 11044 | A12 | 549   | 10551     | AGR2      | 0.0016 | 1.0037 |
| 11079 | B12 | 10230 | 5294      | PIK3CG    | 0.0016 | 1.0037 |
| 51022 | F03 | 56687 | 80332     | ADAM33    | 0.0016 | 1.0038 |
| 11088 | F08 | 2907  | 4916      | NTRK3     | 0.0017 | 1.0039 |
| 31045 | F02 | 223   | 23168     | RTF1      | 0.0017 | 1.0039 |
| 31008 | C08 | 11445 | 338692    | ANKRD13D  | 0.0017 | 1.0039 |
| 11059 | B07 | 240   | 55646     | LYAR      | 0.0017 | 1.0039 |
| 11015 | D09 | 3298  | 4694      | NDUFA1    | 0.0017 | 1.0039 |
| 11032 | D01 | 6040  | 118980    | SFXN2     | 0.0017 | 1.0039 |
| 51030 | E11 | 56143 | 1633      | DCK       | 0.0017 | 1.0040 |
| 11004 | C11 | 715   | 57045     | TWSG1     | 0.0017 | 1.0040 |
| 11026 | C10 | 2308  | 100131997 | FAM27E3   | 0.0018 | 1.0041 |
| 31024 | E03 | 13461 | 90507     | SCRN2     | 0.0018 | 1.0041 |
| 31042 | F02 | 6524  | 4357      | MPST      | 0.0018 | 1.0041 |
| 31019 | D06 | 12999 | 54210     | TREM1     | 0.0018 | 1.0042 |
| 51024 | A02 | 53929 | 55160     | ARHGEF10L | 0.0018 | 1.0042 |
| 11046 | E07 | 6913  | 113115    | FAM54A    | 0.0018 | 1.0042 |
| 51025 | G09 | 53143 | 3996      | LLGL1     | 0.0018 | 1.0042 |
| 51011 | E08 | 54104 | 83851     | SYT16     | 0.0018 | 1.0043 |
| 11017 | E01 | 7453  | 51246     | SHISA5    | 0.0019 | 1.0043 |
| 31018 | C04 | 12983 | 80013     | FAM188A   | 0.0019 | 1.0043 |
| 31022 | G06 | 13388 | 87769     | A2LD1     | 0.0019 | 1.0043 |
| 11086 | E03 | 2886  | 8568      | RRP1      | 0.0019 | 1.0043 |
| 51027 | C06 | 53139 | 93034     | NT5C1B    | 0.0019 | 1.0044 |
| 51032 | D02 | 56355 | 284800    | FAM182A   | 0.0019 | 1.0044 |
| 11079 | A07 | 2244  | 144406    | WDR66     | 0.0019 | 1.0044 |
| 31011 | E02 | 11567 | 8887      | TAX1BP1   | 0.0019 | 1.0045 |
| 11021 | B03 | 5656  | 3816      | KLK1      | 0.0020 | 1.0045 |
| 11050 | E05 | 1663  | 55531     | ELMOD1    | 0.0020 | 1.0045 |
| 31038 | F12 | 4966  | 8445      | DYRK2     | 0.0020 | 1.0045 |
| 11070 | F01 | 8361  | 84167     | C19orf44  | 0.0020 | 1.0046 |
| 11056 | B05 | 6895  | 65009     | NDRG4     | 0.0020 | 1.0046 |
| 11072 | D12 | 3043  | 4957      | ODF2      | 0.0020 | 1.0046 |
| 31026 | G04 | 13834 | 90427     | BMF       | 0.0020 | 1.0046 |
| 11077 | D05 | 4059  | 2633      | GBP1      | 0.0020 | 1.0046 |
| 11018 | E04 | 7903  | 203245    | NAIF1     | 0.0020 | 1.0046 |
| 11008 | C01 | 503   | 468       | ATF4      | 0.0020 | 1.0046 |



|       |     |       |        |          |        |        |
|-------|-----|-------|--------|----------|--------|--------|
| 11034 | C10 | 1660  | 23386  | NUDCD3   | 0.0020 | 1.0047 |
| 11011 | H06 | 653   | 8607   | RUVBL1   | 0.0020 | 1.0047 |
| 11047 | D09 | 1095  | 390    | RND3     | 0.0020 | 1.0047 |
| 31001 | B12 | 10615 | 8706   | B3GALNT1 | 0.0020 | 1.0047 |
| 51028 | G09 | 55562 | 145389 | SLC38A6  | 0.0021 | 1.0047 |
| 31044 | G03 | 4878  | 1241   | LTB4R    | 0.0021 | 1.0047 |
| 31008 | D11 | 11614 | 55082  | ARGLU1   | 0.0021 | 1.0048 |
| 11018 | D07 | 6735  | 706    | TSPO     | 0.0021 | 1.0049 |
| 31039 | B09 | 209   | 11339  | OIP5     | 0.0021 | 1.0049 |
| 11066 | D10 | 2956  | 9684   | LRRC14   | 0.0021 | 1.0049 |
| 31002 | E08 | 10511 | 79730  | NSUN7    | 0.0021 | 1.0049 |
| 31040 | E08 | 10099 | 1746   | DLX2     | 0.0021 | 1.0049 |
| 31044 | G07 | 9629  | 6768   | ST14     | 0.0021 | 1.0049 |
| 11069 | D08 | 10138 | 84958  | SYTL1    | 0.0021 | 1.0049 |
| 11062 | G03 | 1407  | 10881  | ACTL7A   | 0.0022 | 1.0050 |
| 11014 | D11 | 4812  | 2997   | GYS1     | 0.0022 | 1.0050 |
| 31010 | E11 | 11799 | 9513   | FXR2     | 0.0022 | 1.0050 |
| 11082 | H08 | 1511  | 132989 | C4orf36  | 0.0022 | 1.0050 |
| 31003 | B06 | 10556 | 57541  | ZNF398   | 0.0022 | 1.0050 |
| 51033 | E08 | 54773 | 388701 | C1orf189 | 0.0022 | 1.0051 |
| 31036 | C08 | 11873 | 150275 | CCDC117  | 0.0022 | 1.0051 |
| 11071 | E10 | 1074  | 11043  | MID2     | 0.0022 | 1.0051 |
| 31025 | G01 | 13349 | 388536 | ZNF790   | 0.0022 | 1.0052 |
| 31040 | E09 | 9777  | 196743 | PAOX     | 0.0022 | 1.0052 |
| 51005 | E06 | 54010 | 6754   | SSTR4    | 0.0022 | 1.0052 |
| 11056 | A08 | 5944  | 11332  | ACOT7    | 0.0023 | 1.0052 |
| 11030 | F07 | 9750  | 114609 | TIRAP    | 0.0023 | 1.0052 |
| 11007 | C04 | 2785  | 54707  | GPN2     | 0.0023 | 1.0052 |
| 31006 | E11 | 10960 | 5469   | MED1     | 0.0023 | 1.0052 |
| 51021 | A04 | 56330 | 8322   | FZD4     | 0.0023 | 1.0053 |
| 51004 | G04 | 52756 | 201633 | TIGIT    | 0.0023 | 1.0053 |
| 31034 | A05 | 14946 | 5721   | PSME2    | 0.0023 | 1.0053 |
| 31030 | F10 | 14280 | 6046   | BRD2     | 0.0023 | 1.0054 |
| 31029 | D10 | 14254 | 153579 | BTNL9    | 0.0023 | 1.0054 |
| 51006 | G02 | 54732 | 146279 | TEKT5    | 0.0024 | 1.0056 |
| 51011 | E03 | 53994 | 116835 | HSPA12B  | 0.0025 | 1.0057 |
| 31010 | B04 | 11706 | 10454  | TAB1     | 0.0025 | 1.0057 |
| 31008 | F08 | 11331 | 55796  | MBNL3    | 0.0025 | 1.0058 |
| 11053 | A12 | 3589  | 7353   | UFD1L    | 0.0025 | 1.0058 |
| 11017 | H06 | 6500  | 84141  | FAM176A  | 0.0025 | 1.0058 |
| 11028 | B07 | 1067  | 51157  | ZNF580   | 0.0025 | 1.0058 |
| 51021 | B06 | 56360 | 91624  | NEXN     | 0.0025 | 1.0058 |
| 51020 | B06 | 55852 | 8521   | GCM1     | 0.0025 | 1.0058 |
| 11030 | B11 | 9586  | 150365 | MEI1     | 0.0025 | 1.0058 |

|       |     |       |        |            |        |        |
|-------|-----|-------|--------|------------|--------|--------|
| 11044 | F03 | 8637  | 130026 | ICA1L      | 0.0025 | 1.0058 |
| 11014 | D01 | 218   | 11004  | KIF2C      | 0.0025 | 1.0059 |
| 11070 | D11 | 9706  | 89857  | KLHL6      | 0.0026 | 1.0059 |
| 11039 | A02 | 6882  | 8623   | ASMTL      | 0.0026 | 1.0059 |
| 11024 | D09 | 4395  | 833    | CARS       | 0.0026 | 1.0059 |
| 51022 | E02 | 56643 | 83933  | HDAC10     | 0.0026 | 1.0060 |
| 31004 | D08 | 11088 | 4005   | LMO2       | 0.0026 | 1.0061 |
| 31038 | C11 | 9630  | 8877   | SPHK1      | 0.0026 | 1.0061 |
| 11043 | H08 | 953   | 2653   | GCSH       | 0.0027 | 1.0061 |
| 11022 | H05 | 4006  | 2539   | G6PD       | 0.0027 | 1.0061 |
| 51011 | B05 | 52968 | 5578   | PRKCA      | 0.0027 | 1.0062 |
| 51005 | A07 | 53797 | 54715  | A2BP1      | 0.0027 | 1.0062 |
| 11006 | H09 | 7426  | 9694   | TTC35      | 0.0027 | 1.0062 |
| 11040 | A01 | 5159  | 84986  | ARHGAP19   | 0.0027 | 1.0062 |
| 31029 | H10 | 14257 | 141    | ADPRH      | 0.0027 | 1.0063 |
| 11010 | A11 | 4701  | 6122   | RPL3       | 0.0027 | 1.0063 |
| 31004 | A08 | 11018 | 7323   | UBE2D3     | 0.0027 | 1.0063 |
| 51016 | G10 | 56129 | 353132 | LCE1B      | 0.0027 | 1.0063 |
| 11001 | B01 | 403   | 112597 | NCRNA00152 | 0.0028 | 1.0064 |
| 51032 | C02 | 55318 | 4521   | NUDT1      | 0.0028 | 1.0064 |
| 11045 | E07 | 3002  | 54517  | PUS7       | 0.0028 | 1.0065 |
| 11061 | A08 | 7197  | 84553  | C6orf168   | 0.0028 | 1.0065 |
| 31045 | B08 | 4632  | 6224   | RPS20      | 0.0028 | 1.0066 |
| 11075 | A05 | 1683  | 6297   | SALL2      | 0.0029 | 1.0067 |
| 51035 | B03 | 53785 | 84197  | SGK196     | 0.0029 | 1.0067 |
| 11083 | B02 | 9248  | 909    | CD1A       | 0.0029 | 1.0067 |
| 11014 | G05 | 282   | 9782   | MATR3      | 0.0029 | 1.0067 |
| 31044 | E08 | 9581  | 23400  | ATP13A2    | 0.0029 | 1.0067 |
| 31038 | C03 | 14608 | 8331   | HIST1H2AJ  | 0.0029 | 1.0067 |
| 31012 | G11 | 11938 | 3225   | HOXC9      | 0.0029 | 1.0067 |
| 31039 | A12 | 3977  | 10615  | SPAG5      | 0.0029 | 1.0068 |
| 11086 | D02 | 7064  | 84062  | DTNBP1     | 0.0029 | 1.0068 |
| 31044 | H05 | 4081  | 6604   | SMARCD3    | 0.0030 | 1.0068 |
| 51027 | D07 | 55287 | 9903   | KLHL21     | 0.0030 | 1.0069 |
| 11048 | G11 | 2815  | 7923   | HSD17B8    | 0.0030 | 1.0070 |
| 51008 | B12 | 53069 | 10396  | ATP8A1     | 0.0031 | 1.0071 |
| 11038 | F11 | 1287  | 53358  | SHC3       | 0.0031 | 1.0071 |
| 11008 | E03 | 347   | 55559  | HAUS7      | 0.0031 | 1.0071 |
| 11021 | H09 | 3226  | 1861   | TOR1A      | 0.0031 | 1.0071 |
| 11030 | E09 | 8846  | 51078  | THAP4      | 0.0031 | 1.0071 |
| 11003 | B12 | 10237 | 54981  | C9orf95    | 0.0031 | 1.0071 |
| 11069 | E09 | 6616  | 54461  | FBXW5      | 0.0031 | 1.0073 |
| 31039 | E03 | 6669  | 1605   | DAG1       | 0.0032 | 1.0073 |
| 11017 | D05 | 6455  | 5203   | PFDN4      | 0.0032 | 1.0073 |

|       |     |       |           |            |        |        |
|-------|-----|-------|-----------|------------|--------|--------|
| 51009 | D03 | 53085 | 26059     | ERC2       | 0.0032 | 1.0073 |
| 11019 | C11 | 6275  | 7123      | CLEC3B     | 0.0032 | 1.0074 |
| 31007 | H07 | 10826 | 8853      | ASAP2      | 0.0032 | 1.0074 |
| 11026 | E05 | 2890  | 84923     | FAM104A    | 0.0032 | 1.0074 |
| 11035 | E01 | 2122  | 7357      | UGCG       | 0.0032 | 1.0074 |
| 11037 | D07 | 3689  | 2645      | GCK        | 0.0032 | 1.0074 |
| 11067 | G04 | 4300  | 1718      | DHCR24     | 0.0032 | 1.0075 |
| 11063 | E08 | 2874  | 2664      | GDI1       | 0.0033 | 1.0075 |
| 31042 | A12 | 5938  | 9410      | SNRNP40    | 0.0033 | 1.0075 |
| 11012 | B02 | 7569  | 4723      | NDUFV1     | 0.0033 | 1.0076 |
| 31012 | D08 | 12101 | 9958      | USP15      | 0.0033 | 1.0076 |
| 11071 | B06 | 1190  | 79959     | CEP76      | 0.0033 | 1.0076 |
| 31002 | B02 | 10805 | 2776      | GNAQ       | 0.0033 | 1.0076 |
| 11021 | H05 | 3785  | 51608     | GET4       | 0.0033 | 1.0076 |
| 31045 | E05 | 8863  | 51447     | IP6K2      | 0.0033 | 1.0076 |
| 51009 | E08 | 53062 | 9348      | NDST3      | 0.0033 | 1.0077 |
| 51025 | F07 | 56322 | 23387     | SIK3       | 0.0033 | 1.0077 |
| 11060 | C06 | 1386  | 414301    | DDI1       | 0.0034 | 1.0078 |
| 31038 | D04 | 14639 | 1902      | LPAR1      | 0.0034 | 1.0078 |
| 11076 | C11 | 4298  | 50615     | IL21R      | 0.0034 | 1.0078 |
| 11001 | D09 | 3088  | 341       | APOC1      | 0.0034 | 1.0078 |
| 31006 | H08 | 11184 | 7690      | ZNF131     | 0.0034 | 1.0078 |
| 11006 | C09 | 6532  | 79096     | C11orf49   | 0.0034 | 1.0079 |
| 11074 | D06 | 5513  | 25801     | GCA        | 0.0034 | 1.0079 |
| 11080 | G09 | 4767  | 4796      | NFKBIL2    | 0.0035 | 1.0080 |
| 11068 | D11 | 10229 | 8974      | P4HA2      | 0.0035 | 1.0080 |
| 11007 | G04 | 7515  | 7518      | XRCC4      | 0.0035 | 1.0080 |
| 11032 | D09 | 6317  | 29880     | ALG5       | 0.0035 | 1.0081 |
| 51011 | E07 | 53458 | 55512     | SMPD3      | 0.0035 | 1.0081 |
| 51010 | B02 | 54322 | 7709      | ZBTB17     | 0.0035 | 1.0081 |
| 11078 | H11 | 6262  | 996       | CDC27      | 0.0035 | 1.0081 |
| 11022 | D02 | 7328  | 115948    | CCDC151    | 0.0035 | 1.0081 |
| 11010 | D12 | 6082  | 64419     | MTMR14     | 0.0036 | 1.0082 |
| 11042 | C11 | 7060  | 6158      | RPL28      | 0.0036 | 1.0082 |
| 11063 | A11 | 1806  | 51203     | NUSAP1     | 0.0036 | 1.0083 |
| 11026 | G10 | 173   | 94239     | H2AFV      | 0.0036 | 1.0083 |
| 31003 | B03 | 10789 | 11213     | IRAK3      | 0.0036 | 1.0084 |
| 11059 | B11 | 9628  | 7408      | VASP       | 0.0037 | 1.0085 |
| 11017 | G03 | 7913  | 100132341 | KIAA0664L3 | 0.0037 | 1.0085 |
| 51034 | A08 | 55122 | 196051    | PPAPDC1A   | 0.0037 | 1.0086 |
| 11041 | D11 | 2603  | 2577      | GAGE5      | 0.0037 | 1.0086 |
| 31043 | A09 | 6660  | 26986     | PABPC1     | 0.0037 | 1.0086 |
| 51020 | A05 | 56367 | 140894    | C20orf152  | 0.0037 | 1.0086 |
| 51028 | H01 | 55357 | 1600      | DAB1       | 0.0037 | 1.0086 |

|       |     |       |           |           |        |        |
|-------|-----|-------|-----------|-----------|--------|--------|
| 11049 | D01 | 6266  | 90139     | TSPAN18   | 0.0037 | 1.0087 |
| 31001 | F10 | 10326 | 10368     | CACNG3    | 0.0038 | 1.0087 |
| 31001 | F04 | 10403 | 376267    | RAB15     | 0.0038 | 1.0087 |
| 11060 | G10 | 8754  | 54443     | ANLN      | 0.0038 | 1.0088 |
| 31018 | F04 | 13177 | 378708    | APITD1    | 0.0038 | 1.0088 |
| 31042 | D10 | 5166  | 9673      | SLC25A44  | 0.0038 | 1.0089 |
| 11035 | C07 | 4691  | 5833      | PCYT2     | 0.0039 | 1.0089 |
| 51029 | E02 | 53246 | 79682     | MLF1IP    | 0.0039 | 1.0089 |
| 11008 | D05 | 745   | 4793      | NFKBIB    | 0.0039 | 1.0089 |
| 11058 | F01 | 9757  | 152926    | PPM1K     | 0.0039 | 1.0089 |
| 31028 | H04 | 14088 | 554223    | LOC554223 | 0.0039 | 1.0090 |
| 51034 | G06 | 53559 | 6716      | SRD5A2    | 0.0039 | 1.0090 |
| 11066 | G09 | 4740  | 3663      | IRF5      | 0.0039 | 1.0090 |
| 51002 | A11 | 54521 | 2765      | GML       | 0.0039 | 1.0090 |
| 11017 | H10 | 3904  | 7851      | MALL      | 0.0039 | 1.0091 |
| 31024 | B09 | 13428 | 222255    | ATXN7L1   | 0.0039 | 1.0091 |
| 51002 | G07 | 54177 | 339345    | NANOS2    | 0.0039 | 1.0091 |
| 51001 | B09 | 55530 | 83699     | SH3BGRL2  | 0.0039 | 1.0091 |
| 31001 | C05 | 10781 | 388818    | KRTAP26-1 | 0.0039 | 1.0091 |
| 11010 | A12 | 6102  | 59338     | PLEKHA1   | 0.0040 | 1.0091 |
| 11001 | E06 | 2813  | 6352      | CCL5      | 0.0040 | 1.0091 |
| 51009 | E12 | 53840 | 165829    | GPR156    | 0.0040 | 1.0092 |
| 11022 | F09 | 7772  | 5718      | PSMD12    | 0.0040 | 1.0092 |
| 31039 | D12 | 2319  | 100131816 | UBE2DNL   | 0.0040 | 1.0093 |
| 31042 | C02 | 6386  | 57489     | ODF2L     | 0.0040 | 1.0093 |
| 11026 | A10 | 3443  | 6637      | SNRPG     | 0.0040 | 1.0093 |
| 11062 | C04 | 5174  | 10494     | STK25     | 0.0040 | 1.0093 |
| 31020 | F03 | 13240 | 51184     | GPN3      | 0.0040 | 1.0093 |
| 11001 | H03 | 714   | 51650     | MRPS33    | 0.0040 | 1.0093 |
| 11002 | H01 | 10130 | 161253    | REM2      | 0.0040 | 1.0093 |
| 11074 | G04 | 5721  | 56925     | LXN       | 0.0040 | 1.0093 |
| 11060 | D10 | 1600  | 10314     | LANCL1    | 0.0040 | 1.0094 |
| 11017 | C02 | 9149  | 29967     | LRP12     | 0.0040 | 1.0094 |
| 11003 | B05 | 10143 | 136306    | SVOPL     | 0.0041 | 1.0094 |
| 11010 | A08 | 432   | 26135     | SERBP1    | 0.0041 | 1.0094 |
| 11062 | D06 | 9862  | 84654     | SPZ1      | 0.0041 | 1.0095 |
| 51005 | G11 | 54395 | 347735    | SERINC2   | 0.0041 | 1.0096 |
| 31002 | D09 | 10510 | 201798    | TIGD4     | 0.0042 | 1.0096 |
| 11051 | C06 | 2978  | 6307      | SC4MOL    | 0.0042 | 1.0096 |
| 11084 | D11 | 594   | 79269     | DCAF10    | 0.0042 | 1.0096 |
| 51031 | E02 | 56909 | 152573    | SHISA3    | 0.0042 | 1.0097 |
| 11002 | F12 | 9016  | 9204      | ZMYM6     | 0.0042 | 1.0097 |
| 11024 | G08 | 4479  | 6240      | RRM1      | 0.0042 | 1.0097 |
| 51030 | H03 | 56503 | 340069    | FAM170A   | 0.0042 | 1.0097 |

|       |     |       |        |           |        |        |
|-------|-----|-------|--------|-----------|--------|--------|
| 31008 | C04 | 11491 | 128338 | DRAM2     | 0.0042 | 1.0097 |
| 11072 | D04 | 1788  | 79711  | IPO4      | 0.0042 | 1.0097 |
| 31041 | F03 | 7606  | 79444  | BIRC7     | 0.0042 | 1.0097 |
| 11082 | C06 | 8768  | 158427 | TSTD2     | 0.0042 | 1.0097 |
| 11076 | F11 | 966   | 3932   | LCK       | 0.0042 | 1.0098 |
| 11055 | G09 | 8860  | 11060  | WWP2      | 0.0042 | 1.0098 |
| 11009 | E11 | 5567  | 6317   | SERPINB3  | 0.0043 | 1.0099 |
| 11017 | E04 | 7670  | 84908  | FAM136A   | 0.0043 | 1.0099 |
| 11046 | A03 | 1668  | 55145  | THAP1     | 0.0043 | 1.0099 |
| 11045 | F03 | 2089  | 54766  | BTG4      | 0.0043 | 1.0099 |
| 11042 | F02 | 2408  | 28977  | MRPL42    | 0.0043 | 1.0100 |
| 51030 | E02 | 56764 | 83650  | AMAC1L2   | 0.0043 | 1.0100 |
| 31003 | E10 | 10738 | 11231  | SEC63     | 0.0043 | 1.0100 |
| 31044 | D01 | 3724  | 8673   | VAMP8     | 0.0044 | 1.0101 |
| 51020 | C04 | 56049 | 51765  | MST4      | 0.0044 | 1.0101 |
| 31044 | B06 | 3446  | 55227  | LRRC1     | 0.0044 | 1.0101 |
| 11088 | C04 | 5980  | 25842  | ASF1A     | 0.0044 | 1.0102 |
| 11028 | B02 | 8343  | 399670 | RPL13AP17 | 0.0044 | 1.0102 |
| 31008 | B03 | 11365 | 10068  | IL18BP    | 0.0044 | 1.0102 |
| 11076 | G08 | 470   | 57834  | CYP4F11   | 0.0044 | 1.0102 |
| 11044 | G01 | 2697  | 23468  | CBX5      | 0.0044 | 1.0103 |
| 51034 | E07 | 54230 | 4284   | MIP       | 0.0044 | 1.0103 |
| 11006 | H10 | 7259  | 2784   | GNB3      | 0.0044 | 1.0103 |
| 51001 | C08 | 54834 | 285679 | C5orf60   | 0.0044 | 1.0103 |
| 11009 | C12 | 3365  | 170463 | SSBP4     | 0.0045 | 1.0103 |
| 11050 | E01 | 1856  | 131540 | ZDHHC19   | 0.0045 | 1.0104 |
| 11016 | A12 | 6295  | 1475   | CSTA      | 0.0045 | 1.0104 |
| 51014 | E12 | 53027 | 230    | ALDOC     | 0.0045 | 1.0105 |
| 11079 | B04 | 723   | 5066   | PAM       | 0.0046 | 1.0106 |
| 11046 | B12 | 3205  | 5867   | RAB4A     | 0.0046 | 1.0106 |
| 11059 | G04 | 4797  | 80700  | UBXN6     | 0.0046 | 1.0107 |
| 11025 | H01 | 5060  | 9810   | RNF40     | 0.0046 | 1.0107 |
| 11070 | G04 | 7861  | 3507   | IGHM      | 0.0046 | 1.0107 |
| 31011 | E08 | 11963 | NA     | NA        | 0.0046 | 1.0107 |
| 51005 | F01 | 55812 | 1539   | CYLC2     | 0.0046 | 1.0107 |
| 51004 | D05 | 53798 | 27247  | NFU1      | 0.0046 | 1.0108 |
| 51033 | A04 | 55348 | NA     | NA        | 0.0047 | 1.0108 |
| 51012 | C04 | 52665 | 80024  | SLC24A6   | 0.0047 | 1.0108 |
| 11086 | G05 | 8480  | 3594   | IL12RB1   | 0.0047 | 1.0109 |
| 11089 | C01 | 1082  | 11182  | SLC2A6    | 0.0047 | 1.0109 |
| 11047 | A10 | 9656  | NA     | NA        | 0.0047 | 1.0109 |
| 51035 | G03 | 53606 | 3361   | HTR5A     | 0.0047 | 1.0109 |
| 31007 | D06 | 10945 | 8874   | ARHGEF7   | 0.0047 | 1.0109 |
| 31045 | D04 | 7243  | 55072  | RNF31     | 0.0047 | 1.0109 |

|       |     |       |        |            |        |        |
|-------|-----|-------|--------|------------|--------|--------|
| 11083 | D11 | 4708  | 1312   | COMT       | 0.0047 | 1.0110 |
| 51002 | G01 | 52572 | 9084   | VCY        | 0.0047 | 1.0110 |
| 31008 | E07 | 11823 | 10898  | CPSF4      | 0.0047 | 1.0110 |
| 11044 | C06 | 530   | 754    | PTTG1IP    | 0.0048 | 1.0110 |
| 51028 | E02 | 55624 | 26000  | TBC1D10B   | 0.0048 | 1.0110 |
| 11030 | G11 | 6746  | 3052   | HCCS       | 0.0048 | 1.0110 |
| 31008 | D04 | 11330 | 408029 | C2orf27B   | 0.0048 | 1.0111 |
| 11074 | D10 | 8942  | 11322  | TMC6       | 0.0048 | 1.0111 |
| 11010 | B10 | 497   | 957    | ENTPD5     | 0.0048 | 1.0111 |
| 11019 | E05 | 8857  | 55040  | EPN3       | 0.0048 | 1.0111 |
| 11059 | C12 | 3908  | 27005  | USP21      | 0.0048 | 1.0111 |
| 11076 | F09 | 9295  | 55296  | TBC1D19    | 0.0048 | 1.0111 |
| 11072 | H04 | 1916  | 139105 | BEND2      | 0.0048 | 1.0111 |
| 11021 | E03 | 5599  | 3364   | HUS1       | 0.0048 | 1.0112 |
| 31015 | E06 | 12468 | 221545 | C6orf136   | 0.0048 | 1.0112 |
| 11061 | B08 | 8355  | 55876  | GSDMB      | 0.0048 | 1.0112 |
| 11068 | H06 | 2116  | 7566   | ZNF18      | 0.0048 | 1.0112 |
| 51023 | C11 | 54997 | 3716   | JAK1       | 0.0048 | 1.0112 |
| 11012 | A06 | 113   | 1915   | EEF1A1     | 0.0049 | 1.0112 |
| 11075 | F10 | 3826  | 5434   | POLR2E     | 0.0049 | 1.0112 |
| 31007 | F02 | 11058 | 163882 | CNST       | 0.0049 | 1.0113 |
| 31009 | E10 | 11393 | 4351   | MPI        | 0.0049 | 1.0113 |
| 11058 | E05 | 2311  | 4735   | SEPT2      | 0.0049 | 1.0113 |
| 51012 | G04 | 53032 | 60482  | SLC5A7     | 0.0049 | 1.0113 |
| 11053 | D02 | 3896  | 6576   | SLC25A1    | 0.0049 | 1.0114 |
| 31018 | D11 | 13083 | 10878  | CFHR3      | 0.0049 | 1.0114 |
| 31007 | B09 | 12221 | 23644  | EDC4       | 0.0049 | 1.0114 |
| 11022 | F07 | 7597  | 3662   | IRF4       | 0.0049 | 1.0114 |
| 51002 | H09 | 55492 | 257000 | PLAC2      | 0.0049 | 1.0114 |
| 11021 | G09 | 3867  | 84275  | SLC25A33   | 0.0049 | 1.0115 |
| 51026 | F10 | 56822 | 10020  | GNE        | 0.0050 | 1.0115 |
| 31022 | D05 | 13328 | 283    | ANG        | 0.0050 | 1.0115 |
| 51003 | B09 | 55580 | 1489   | CTF1       | 0.0050 | 1.0115 |
| 31030 | G09 | 14271 | 199704 | ZNF585A    | 0.0050 | 1.0116 |
| 31006 | E05 | 10851 | 5915   | RARB       | 0.0050 | 1.0116 |
| 11027 | H04 | 2675  | 51367  | POP5       | 0.0050 | 1.0116 |
| 11019 | C08 | 7407  | 5005   | ORM2       | 0.0050 | 1.0117 |
| 11028 | F07 | 728   | 147184 | CENPN      | 0.0050 | 1.0117 |
| 11074 | F09 | 4163  | 51090  | PLLP       | 0.0050 | 1.0117 |
| 11063 | F08 | 4260  | 84790  | TUBA1C     | 0.0051 | 1.0117 |
| 11005 | B03 | 3905  | 6638   | SNRPN      | 0.0051 | 1.0117 |
| 11058 | C06 | 1475  | 403314 | APOBEC4    | 0.0051 | 1.0118 |
| 11018 | D10 | 6990  | 54788  | DNAJB12    | 0.0051 | 1.0118 |
| 11016 | G09 | 5667  | 84832  | ANKRD36BP1 | 0.0051 | 1.0118 |

|       |     |       |        |           |        |        |
|-------|-----|-------|--------|-----------|--------|--------|
| 51014 | C05 | 52994 | 258    | AMBN      | 0.0051 | 1.0118 |
| 11060 | A04 | 9533  | 374618 | TEX9      | 0.0051 | 1.0118 |
| 11065 | D08 | 383   | 90441  | ZNF622    | 0.0051 | 1.0118 |
| 51002 | D02 | 52571 | 3018   | HIST1H2BB | 0.0051 | 1.0118 |
| 11021 | D05 | 5107  | 84307  | ZNF397    | 0.0051 | 1.0118 |
| 11087 | H05 | 9453  | 80778  | ZNF34     | 0.0051 | 1.0118 |
| 51024 | H01 | 56089 | 26098  | C10orf137 | 0.0051 | 1.0118 |
| 11004 | H08 | 68    | 81926  | FAM108A1  | 0.0051 | 1.0119 |
| 11016 | F04 | 3702  | 4701   | NDUFA7    | 0.0051 | 1.0119 |
| 11018 | E09 | 6960  | 6135   | RPL11     | 0.0052 | 1.0119 |
| 11075 | D07 | 2374  | 23204  | ARL6IP1   | 0.0052 | 1.0120 |
| 11051 | H01 | 4446  | 2067   | ERCC1     | 0.0052 | 1.0120 |
| 11054 | C12 | 4405  | 79174  | CRELD2    | 0.0052 | 1.0121 |
| 31028 | B11 | 14170 | 8936   | WASF1     | 0.0052 | 1.0121 |
| 11085 | A07 | 8300  | 3779   | KCNMB1    | 0.0052 | 1.0121 |
| 31041 | F06 | 5845  | 3507   | IGHM      | 0.0052 | 1.0121 |
| 11022 | B04 | 7558  | 10641  | NPRL2     | 0.0052 | 1.0122 |
| 31038 | A11 | 8665  | 56899  | ANKS1B    | 0.0053 | 1.0122 |
| 11081 | B12 | 1737  | 619343 | C8orf68   | 0.0053 | 1.0123 |
| 11043 | H04 | 4990  | 11165  | NUDT3     | 0.0053 | 1.0123 |
| 31029 | B05 | 14419 | 92703  | TMEM183A  | 0.0053 | 1.0123 |
| 11010 | H07 | 3179  | 10212  | DDX39     | 0.0053 | 1.0123 |
| 31041 | B06 | 5436  | 3831   | KLC1      | 0.0053 | 1.0124 |
| 51015 | H07 | 53038 | 4860   | PNP       | 0.0053 | 1.0124 |
| 51028 | H05 | 55834 | 3889   | KRT83     | 0.0054 | 1.0124 |
| 11079 | D03 | 5196  | 57062  | DDX24     | 0.0054 | 1.0125 |
| 11085 | H01 | 2283  | 117245 | HRASLS5   | 0.0054 | 1.0125 |
| 51012 | F12 | 52909 | 94015  | TTYH2     | 0.0054 | 1.0125 |
| 11017 | F12 | 6341  | 3047   | HBG1      | 0.0054 | 1.0126 |
| 51004 | C08 | 54672 | 89778  | SERPINB11 | 0.0054 | 1.0126 |
| 31044 | A03 | 3509  | 5955   | RCN2      | 0.0055 | 1.0126 |
| 11088 | G08 | 789   | 122786 | FRMD6     | 0.0055 | 1.0127 |
| 51026 | H03 | 55532 | 83637  | ZMIZ2     | 0.0055 | 1.0128 |
| 11045 | B09 | 616   | 9270   | ITGB1BP1  | 0.0055 | 1.0128 |
| 11016 | H05 | 9011  | 23136  | EPB41L3   | 0.0055 | 1.0128 |
| 31019 | F12 | 13261 | 10635  | RAD51AP1  | 0.0055 | 1.0128 |
| 51024 | H09 | 55132 | 81846  | SBF2      | 0.0055 | 1.0128 |
| 51030 | G01 | 56912 | 388595 | TMEM82    | 0.0055 | 1.0128 |
| 51029 | D01 | 55456 | NA     | NA        | 0.0055 | 1.0128 |
| 51025 | F09 | 53165 | 1356   | CP        | 0.0055 | 1.0128 |
| 51031 | H02 | 55420 | 171177 | RHOV      | 0.0055 | 1.0129 |
| 31029 | F05 | 14468 | 27010  | TPK1      | 0.0056 | 1.0129 |
| 11032 | C04 | 6662  | 26123  | TCTN3     | 0.0056 | 1.0129 |
| 11053 | F05 | 1976  | 6785   | ELOVL4    | 0.0056 | 1.0129 |

|       |     |       |        |                     |        |        |
|-------|-----|-------|--------|---------------------|--------|--------|
| 11025 | A06 | 9931  | 22899  | ARHGEF15            | 0.0056 | 1.0130 |
| 11062 | B05 | 6636  | 115572 | FAM46B              | 0.0056 | 1.0130 |
| 11003 | F06 | 6159  | 7078   | TIMP3               | 0.0056 | 1.0131 |
| 31032 | F03 | 14622 | 2687   | GGT5                | 0.0057 | 1.0131 |
| 51035 | H04 | 53257 | 4207   | LOC729991-<br>MEF2B | 0.0057 | 1.0132 |
| 11087 | C07 | 7212  | 9531   | BAG3                | 0.0057 | 1.0133 |
| 51027 | B03 | 55543 | 11054  | OGFR                | 0.0057 | 1.0133 |
| 51006 | G04 | 54241 | 8638   | OASL                | 0.0058 | 1.0134 |
| 31017 | H02 | 12633 | 7280   | TUBB2A              | 0.0058 | 1.0134 |
| 51022 | A09 | 56663 | 134265 | AFAP1L1             | 0.0058 | 1.0134 |
| 51021 | B11 | 56390 | 2160   | F11                 | 0.0058 | 1.0134 |
| 11030 | B09 | 398   | 10285  | SMNDC1              | 0.0058 | 1.0134 |
| 11003 | H11 | 231   | 5901   | RAN                 | 0.0058 | 1.0135 |
| 11027 | D05 | 3379  | 125058 | TBC1D16             | 0.0058 | 1.0135 |
| 11076 | D02 | 4889  | 79961  | DENND2D             | 0.0058 | 1.0135 |
| 11028 | F11 | 3360  | 65991  | FUNDC2              | 0.0058 | 1.0135 |
| 11084 | C09 | 10225 | 7355   | SLC35A2             | 0.0058 | 1.0136 |
| 11082 | B11 | 2195  | 375189 | PFN4                | 0.0058 | 1.0136 |
| 11027 | A01 | 6097  | 3956   | LGALS1              | 0.0059 | 1.0136 |
| 11055 | E03 | 4770  | 2531   | KDSR                | 0.0059 | 1.0136 |
| 11005 | C06 | 3062  | 1632   | DCI                 | 0.0059 | 1.0136 |
| 31015 | E03 | 12766 | 90874  | ZNF697              | 0.0059 | 1.0136 |
| 11015 | F06 | 3217  | 26471  | NUPR1               | 0.0059 | 1.0136 |
| 11024 | C07 | 10122 | 149371 | EXOC8               | 0.0059 | 1.0136 |
| 51021 | B12 | 56660 | 79741  | C10orf68            | 0.0059 | 1.0137 |
| 11076 | A08 | 1655  | 23759  | PPIL2               | 0.0059 | 1.0137 |
| 31042 | E02 | 6120  | 6622   | SNCA                | 0.0059 | 1.0137 |
| 11039 | B04 | 8686  | 1756   | DMD                 | 0.0059 | 1.0138 |
| 11029 | G03 | 3477  | 58516  | FAM60A              | 0.0060 | 1.0139 |
| 11017 | B01 | 6360  | 30834  | ZNRD1               | 0.0060 | 1.0139 |
| 11076 | G01 | 5768  | 6303   | SAT1                | 0.0060 | 1.0139 |
| 11077 | H03 | 1363  | 7556   | ZNF10               | 0.0060 | 1.0139 |
| 11043 | H10 | 6845  | 10591  | C6orf108            | 0.0060 | 1.0139 |
| 11050 | D10 | 175   | 29896  | TRA2A               | 0.0061 | 1.0140 |
| 11051 | C02 | 6197  | 896    | CCND3               | 0.0061 | 1.0141 |
| 51033 | C08 | 54765 | 388533 | KRTDAP              | 0.0061 | 1.0141 |
| 51009 | F08 | 52709 | 56098  | PCDHGC4             | 0.0061 | 1.0142 |
| 31002 | C02 | 10745 | 10352  | WARS2               | 0.0061 | 1.0142 |
| 11044 | C07 | 3029  | 4681   | NBL1                | 0.0062 | 1.0143 |
| 11012 | D09 | 2475  | 60313  | GPBPIL1             | 0.0062 | 1.0143 |
| 31001 | B09 | 10252 | 2332   | FMR1                | 0.0062 | 1.0143 |
| 51004 | A05 | 55326 | 51249  | TMEM69              | 0.0062 | 1.0143 |
| 51034 | E12 | 54664 | 339501 | PRSS38              | 0.0062 | 1.0144 |
| 11086 | E12 | 5928  | 51582  | AZIN1               | 0.0062 | 1.0144 |



|       |     |       |        |          |        |        |
|-------|-----|-------|--------|----------|--------|--------|
| 11012 | D02 | 8197  | 1968   | EIF2S3   | 0.0062 | 1.0144 |
| 11014 | B11 | 641   | 55613  | MTMR8    | 0.0062 | 1.0145 |
| 31029 | E03 | 14353 | 51686  | OAZ3     | 0.0062 | 1.0145 |
| 11015 | H03 | 5756  | 23658  | LSM5     | 0.0062 | 1.0145 |
| 31045 | A04 | 9124  | 2316   | FLNA     | 0.0062 | 1.0145 |
| 51006 | E05 | 54692 | 57594  | HOMEZ    | 0.0063 | 1.0145 |
| 31005 | E06 | 10940 | 29883  | CNOT7    | 0.0063 | 1.0145 |
| 51032 | D01 | 53332 | 388335 | TMEM220  | 0.0063 | 1.0145 |
| 51023 | C07 | 56198 | 199713 | NLRP7    | 0.0063 | 1.0146 |
| 51023 | G06 | 54005 | 64005  | MYO1G    | 0.0063 | 1.0146 |
| 51025 | B04 | 56870 | 23279  | NUP160   | 0.0063 | 1.0146 |
| 11004 | D11 | 2358  | 10231  | RCAN2    | 0.0063 | 1.0146 |
| 11050 | E02 | 2006  | 167410 | LIX1     | 0.0063 | 1.0146 |
| 51027 | C09 | 55286 | 9546   | APBA3    | 0.0063 | 1.0146 |
| 31041 | E04 | 7248  | 89953  | KLC4     | 0.0063 | 1.0147 |
| 31010 | C07 | 11552 | 220108 | FAM124A  | 0.0064 | 1.0147 |
| 31039 | G09 | 350   | NA     | NA       | 0.0064 | 1.0148 |
| 31011 | F10 | 12289 | 26099  | C1orf144 | 0.0064 | 1.0148 |
| 11062 | C07 | 9078  | 4967   | OGDH     | 0.0064 | 1.0148 |
| 11077 | A08 | 3939  | 10482  | NXF1     | 0.0064 | 1.0149 |
| 31025 | B10 | 14083 | 8359   | HIST1H4A | 0.0064 | 1.0149 |
| 31043 | F06 | 7231  | 6693   | SPN      | 0.0064 | 1.0149 |
| 11025 | H10 | 2586  | 8467   | SMARCA5  | 0.0064 | 1.0150 |
| 11067 | E06 | 6784  | 114034 | TOE1     | 0.0065 | 1.0150 |
| 11009 | B04 | 7759  | 4704   | NDUFA9   | 0.0065 | 1.0151 |
| 11047 | H06 | 1092  | 3955   | LFNG     | 0.0065 | 1.0151 |
| 31018 | E08 | 12861 | 149563 | C1orf64  | 0.0065 | 1.0151 |
| 11079 | G02 | 2149  | 79048  | SECISBP2 | 0.0065 | 1.0151 |
| 11017 | A07 | 6556  | 81631  | MAP1LC3B | 0.0065 | 1.0151 |
| 31029 | C03 | 14321 | 338328 | GPIHBP1  | 0.0065 | 1.0152 |
| 31023 | H09 | 13673 | 118738 | ZNF488   | 0.0066 | 1.0152 |
| 51001 | A03 | 54806 | 613211 | DEFB134  | 0.0066 | 1.0152 |
| 31001 | C10 | 10622 | 285622 | NBPF22P  | 0.0066 | 1.0153 |
| 11073 | H08 | 1896  | 84417  | C2orf40  | 0.0066 | 1.0153 |
| 51029 | H02 | 55663 | 6006   | RHCE     | 0.0066 | 1.0154 |
| 11044 | B04 | 581   | 114569 | MAL2     | 0.0066 | 1.0154 |
| 31032 | A04 | 14654 | 25802  | LMOD1    | 0.0067 | 1.0155 |
| 31002 | D06 | 10435 | 10316  | NMUR1    | 0.0067 | 1.0155 |
| 11057 | D12 | 8242  | 126526 | C19orf47 | 0.0067 | 1.0155 |
| 51033 | F11 | 53735 | 169355 | IDO2     | 0.0067 | 1.0155 |
| 11085 | G01 | 8965  | 1280   | COL2A1   | 0.0067 | 1.0155 |
| 11037 | E03 | 6422  | 51302  | CYP39A1  | 0.0067 | 1.0156 |
| 31038 | A04 | 14604 | 3605   | IL17A    | 0.0067 | 1.0157 |
| 31039 | H09 | 622   | 708    | C1QBP    | 0.0068 | 1.0157 |

|       |     |       |        |          |        |        |
|-------|-----|-------|--------|----------|--------|--------|
| 31038 | F10 | 10244 | 10922  | FASTK    | 0.0068 | 1.0157 |
| 11022 | A11 | 3123  | 71     | ACTG1    | 0.0068 | 1.0157 |
| 31040 | F04 | 9197  | 219541 | MED19    | 0.0068 | 1.0157 |
| 31041 | F07 | 5221  | 55768  | NGLY1    | 0.0068 | 1.0157 |
| 11074 | G07 | 5118  | 5479   | PPIB     | 0.0068 | 1.0158 |
| 51033 | B07 | 54599 | 10911  | UTS2     | 0.0068 | 1.0158 |
| 31006 | C12 | 11021 | 90288  | C3orf25  | 0.0068 | 1.0159 |
| 31044 | A02 | 4833  | 7423   | VEGFB    | 0.0069 | 1.0159 |
| 11052 | D08 | 1052  | 27033  | ZBTB32   | 0.0069 | 1.0159 |
| 11036 | F10 | 2049  | 84944  | MAEL     | 0.0069 | 1.0160 |
| 11001 | G08 | 183   | 58493  | C9orf80  | 0.0069 | 1.0160 |
| 11056 | B01 | 4474  | 8416   | ANXA9    | 0.0069 | 1.0160 |
| 11055 | C03 | 9736  | 151306 | GPBAR1   | 0.0069 | 1.0160 |
| 11035 | C09 | 9885  | 79822  | ARHGAP28 | 0.0069 | 1.0160 |
| 31044 | A06 | 3424  | 81490  | PTDSS2   | 0.0069 | 1.0161 |
| 11046 | B04 | 1249  | 6014   | RIT2     | 0.0070 | 1.0162 |
| 11070 | H11 | 9868  | 10403  | NDC80    | 0.0070 | 1.0162 |
| 11083 | F12 | 2641  | 90273  | CEACAM21 | 0.0070 | 1.0162 |
| 11051 | A10 | 6440  | 7257   | TSNAX    | 0.0070 | 1.0162 |
| 11069 | D06 | 9967  | 11022  | TDRKH    | 0.0070 | 1.0163 |
| 11051 | F01 | 2531  | 121536 | AEBP2    | 0.0070 | 1.0163 |
| 11005 | F10 | 408   | 10099  | TSPAN3   | 0.0070 | 1.0163 |
| 31041 | H07 | 6835  | 57510  | XPO5     | 0.0071 | 1.0164 |
| 51029 | B01 | 56791 | 81030  | ZBP1     | 0.0071 | 1.0164 |
| 31037 | G02 | 12346 | 2006   | ELN      | 0.0071 | 1.0164 |
| 31010 | F10 | 11749 | 8906   | AP1G2    | 0.0071 | 1.0164 |
| 51027 | F08 | 55333 | 4335   | MNT      | 0.0071 | 1.0165 |
| 11079 | D06 | 6122  | 5822   | PWP2     | 0.0071 | 1.0165 |
| 11013 | B10 | 8139  | 64858  | DCLRE1B  | 0.0071 | 1.0166 |
| 51021 | D08 | 56381 | 2138   | EYA1     | 0.0072 | 1.0166 |
| 51025 | G02 | 56886 | 5469   | MED1     | 0.0072 | 1.0166 |
| 11075 | H10 | 8595  | 84280  | BTBD10   | 0.0072 | 1.0167 |
| 11039 | G06 | 2365  | 7844   | RNF103   | 0.0072 | 1.0167 |
| 11001 | F08 | 134   | 6347   | CCL2     | 0.0072 | 1.0167 |
| 11071 | H07 | 1378  | 84101  | USP44    | 0.0072 | 1.0167 |
| 11057 | D08 | 7286  | 112970 | KTI12    | 0.0072 | 1.0167 |
| 31024 | F09 | 13531 | 10420  | TESK2    | 0.0073 | 1.0168 |
| 11066 | H10 | 7052  | 115509 | ZNF689   | 0.0073 | 1.0169 |
| 11007 | A05 | 1207  | 151871 | DPPA2    | 0.0073 | 1.0169 |
| 11056 | D02 | 4719  | 54961  | SSH3     | 0.0073 | 1.0169 |
| 11036 | E12 | 1439  | 54682  | MANSC1   | 0.0073 | 1.0169 |
| 51011 | C03 | 52831 | 639    | PRDM1    | 0.0073 | 1.0169 |
| 11030 | C02 | 3653  | 7307   | U2AF1    | 0.0073 | 1.0170 |
| 31045 | D05 | 9509  | 2947   | GSTM3    | 0.0073 | 1.0170 |

|       |     |       |        |          |        |        |
|-------|-----|-------|--------|----------|--------|--------|
| 31007 | D07 | 10898 | 55616  | ASAP3    | 0.0073 | 1.0171 |
| 11019 | A03 | 7020  | 90121  | TSR2     | 0.0074 | 1.0171 |
| 11029 | F09 | 3504  | 11030  | RBPMS    | 0.0074 | 1.0171 |
| 31025 | G07 | 13710 | 6744   | SSFA2    | 0.0074 | 1.0171 |
| 11016 | E08 | 5628  | 3630   | INS      | 0.0074 | 1.0171 |
| 31010 | A12 | 11721 | 54545  | MTMR12   | 0.0074 | 1.0171 |
| 31001 | G02 | 10553 | 64388  | GREM2    | 0.0074 | 1.0171 |
| 31029 | D04 | 14379 | 1797   | DOM3Z    | 0.0074 | 1.0172 |
| 31001 | E01 | 10554 | 23406  | COTL1    | 0.0074 | 1.0172 |
| 51010 | F10 | 54730 | 55521  | TRIM36   | 0.0074 | 1.0173 |
| 51015 | E09 | 52754 | 284185 | C17orf55 | 0.0074 | 1.0173 |
| 11021 | F10 | 3384  | 83787  | ARMC10   | 0.0074 | 1.0173 |
| 11073 | H05 | 3923  | 25906  | C11orf51 | 0.0074 | 1.0173 |
| 11015 | E10 | 6478  | 50854  | C6orf48  | 0.0075 | 1.0173 |
| 11009 | A11 | 5633  | 29922  | NME7     | 0.0075 | 1.0173 |
| 51003 | E04 | 52635 | 200132 | TCTEX1D1 | 0.0075 | 1.0174 |
| 11036 | D05 | 2375  | 10606  | PAICS    | 0.0075 | 1.0174 |
| 11082 | H09 | 1408  | 135927 | C7orf34  | 0.0075 | 1.0175 |
| 31010 | G06 | 11432 | 200958 | MUC20    | 0.0075 | 1.0175 |
| 51022 | G08 | 56171 | 166793 | ZBTB49   | 0.0075 | 1.0175 |
| 11053 | G01 | 4737  | 3705   | ITPK1    | 0.0075 | 1.0175 |
| 11049 | G10 | 587   | 51162  | EGFL7    | 0.0075 | 1.0175 |
| 51006 | H02 | 52813 | 284307 | ZIK1     | 0.0076 | 1.0176 |
| 51005 | B06 | 54602 | 343472 | BARHL2   | 0.0076 | 1.0177 |
| 31019 | H01 | 12847 | 84186  | ZCCHC7   | 0.0076 | 1.0178 |
| 51030 | D11 | 55379 | 55251  | PCMTD2   | 0.0077 | 1.0178 |
| 31025 | F11 | 14052 | 5948   | RBP2     | 0.0077 | 1.0178 |
| 11053 | C04 | 3846  | 26150  | RIBC2    | 0.0077 | 1.0178 |
| 31041 | H03 | 6501  | 129138 | ANKRD54  | 0.0077 | 1.0179 |
| 11003 | D11 | 9255  | 93190  | C1orf158 | 0.0077 | 1.0179 |
| 31005 | D10 | 11240 | 80830  | APOL6    | 0.0077 | 1.0179 |
| 31044 | F02 | 4936  | 3196   | TLX2     | 0.0077 | 1.0179 |
| 11035 | F07 | 8879  | 23450  | SF3B3    | 0.0077 | 1.0179 |
| 51015 | C10 | 52788 | 441273 | SPDYE2   | 0.0077 | 1.0179 |
| 11073 | F09 | 8938  | 84807  | NFKBID   | 0.0077 | 1.0179 |
| 31026 | H04 | 13825 | 158800 | RHOXF1   | 0.0077 | 1.0179 |
| 11071 | F11 | 7242  | 8833   | GMPS     | 0.0077 | 1.0179 |
| 11066 | B06 | 1429  | 6000   | RGS7     | 0.0077 | 1.0180 |
| 51003 | B07 | 56706 | 79647  | AKIRIN1  | 0.0078 | 1.0180 |
| 11026 | F01 | 508   | 57149  | LYRM1    | 0.0078 | 1.0180 |
| 31030 | F02 | 14302 | 23030  | KDM4B    | 0.0078 | 1.0181 |
| 51001 | D09 | 54700 | 414899 | BLID     | 0.0078 | 1.0181 |
| 31045 | C06 | 3491  | 5437   | POLR2H   | 0.0078 | 1.0181 |
| 11022 | H09 | 5376  | 80755  | AARSD1   | 0.0078 | 1.0182 |

|       |     |       |           |            |        |        |
|-------|-----|-------|-----------|------------|--------|--------|
| 31011 | G09 | 12183 | 84316     | LSMD1      | 0.0078 | 1.0182 |
| 11070 | C08 | 7850  | 10644     | IGF2BP2    | 0.0079 | 1.0183 |
| 11077 | C04 | 4182  | 54980     | C2orf42    | 0.0079 | 1.0183 |
| 11002 | D07 | 9685  | 57157     | PHTF2      | 0.0079 | 1.0184 |
| 51003 | F05 | 53113 | 3316      | HSPB2      | 0.0079 | 1.0184 |
| 31012 | F03 | 12243 | 5554      | PRH1       | 0.0079 | 1.0184 |
| 11007 | F06 | 4855  | 29086     | C19orf62   | 0.0079 | 1.0184 |
| 11063 | D08 | 8261  | 10948     | STARD3     | 0.0079 | 1.0184 |
| 11019 | F04 | 3638  | 11264     | PXMP4      | 0.0079 | 1.0185 |
| 51003 | F03 | 53098 | 348262    | FAM195B    | 0.0079 | 1.0185 |
| 11029 | C11 | 9287  | 127428    | C1orf83    | 0.0080 | 1.0185 |
| 51008 | C07 | 55128 | 83990     | BRIP1      | 0.0080 | 1.0185 |
| 11022 | E04 | 7767  | 90507     | SCRN2      | 0.0080 | 1.0186 |
| 11019 | B12 | 6460  | 6717      | SRI        | 0.0080 | 1.0187 |
| 31022 | C03 | 13502 | 8000      | PSCA       | 0.0080 | 1.0187 |
| 11048 | C09 | 2605  | 2001      | ELF5       | 0.0080 | 1.0187 |
| 11038 | D05 | 5946  | 59348     | ZNF350     | 0.0080 | 1.0187 |
| 11034 | B05 | 3658  | 51726     | DNAJB11    | 0.0080 | 1.0187 |
| 11072 | C02 | 8161  | 57182     | ANKRD50    | 0.0081 | 1.0187 |
| 11072 | G04 | 2182  | 1016      | CDH18      | 0.0081 | 1.0187 |
| 51032 | D03 | 55539 | 729533    | FAM72A     | 0.0081 | 1.0188 |
| 11039 | G03 | 1462  | 9899      | SV2B       | 0.0081 | 1.0188 |
| 51002 | D08 | 56443 | 100287569 | NCRNA00173 | 0.0081 | 1.0188 |
| 11078 | C01 | 7705  | 51517     | NCKIPSD    | 0.0081 | 1.0188 |
| 11043 | A06 | 4229  | 4149      | MAX        | 0.0081 | 1.0188 |
| 51008 | D07 | 55496 | 26166     | RGS22      | 0.0081 | 1.0188 |
| 11048 | A10 | 4436  | 81619     | TSPAN14    | 0.0081 | 1.0188 |
| 31004 | G02 | 10397 | 23255     | KIAA0802   | 0.0081 | 1.0189 |
| 51025 | G10 | 53326 | 4012      | LNPEP      | 0.0081 | 1.0189 |
| 11079 | C05 | 7153  | 55034     | MOCOS      | 0.0082 | 1.0189 |
| 11073 | G04 | 4794  | 885       | CCK        | 0.0082 | 1.0190 |
| 11002 | C07 | 10072 | 6210      | RPS15A     | 0.0082 | 1.0190 |
| 11041 | F07 | 8052  | 149708    | WFDC5      | 0.0082 | 1.0190 |
| 11010 | B11 | 5565  | 8564      | KMO        | 0.0082 | 1.0190 |
| 11032 | F10 | 9516  | 79805     | VASH2      | 0.0082 | 1.0191 |
| 51008 | C06 | 53185 | 55749     | CCAR1      | 0.0082 | 1.0192 |
| 31034 | C03 | 14883 | 54675     | CRLS1      | 0.0083 | 1.0192 |
| 51021 | C07 | 56393 | 126549    | ANKLE1     | 0.0083 | 1.0192 |
| 31044 | H06 | 5167  | 55210     | ATAD3A     | 0.0083 | 1.0192 |
| 51006 | F09 | 53270 | 2572      | GAD2       | 0.0083 | 1.0192 |
| 11032 | D07 | 9686  | 53340     | SPA17      | 0.0083 | 1.0192 |
| 11051 | A08 | 9386  | 284161    | GDPD1      | 0.0083 | 1.0193 |
| 11087 | H01 | 1689  | 27250     | PDCD4      | 0.0083 | 1.0193 |
| 31006 | C05 | 11302 | 55062     | WIPI1      | 0.0083 | 1.0193 |

|       |     |       |        |           |        |        |
|-------|-----|-------|--------|-----------|--------|--------|
| 11020 | C11 | 3515  | 150274 | HSCB      | 0.0083 | 1.0193 |
| 11059 | A05 | 10198 | 150465 | TTL       | 0.0083 | 1.0193 |
| 31017 | C01 | 12431 | 55147  | RBM23     | 0.0083 | 1.0193 |
| 11019 | C10 | 7763  | 9367   | RAB9A     | 0.0083 | 1.0193 |
| 11051 | E06 | 2877  | 5995   | RGR       | 0.0083 | 1.0194 |
| 51028 | H07 | 55659 | 8786   | RGS11     | 0.0083 | 1.0194 |
| 11061 | A10 | 9643  | 6996   | TDG       | 0.0084 | 1.0194 |
| 11056 | E09 | 7330  | 51006  | SLC35C2   | 0.0084 | 1.0194 |
| 31010 | H11 | 11500 | 4939   | OAS2      | 0.0084 | 1.0195 |
| 51027 | B09 | 55552 | 2166   | FAAH      | 0.0084 | 1.0195 |
| 51030 | D02 | 55471 | 10587  | TXNRD2    | 0.0084 | 1.0196 |
| 31042 | D06 | 6023  | 10541  | ANP32B    | 0.0084 | 1.0196 |
| 11048 | D07 | 4197  | 54925  | ZNF434    | 0.0084 | 1.0196 |
| 11002 | A08 | 9570  | 254863 | C17orf61  | 0.0084 | 1.0196 |
| 11007 | F01 | 5470  | 10327  | AKR1A1    | 0.0085 | 1.0197 |
| 51026 | F11 | 53321 | 6397   | SEC14L1   | 0.0085 | 1.0197 |
| 11075 | H11 | 5652  | 400    | ARL1      | 0.0085 | 1.0198 |
| 11080 | G05 | 1749  | 84073  | MYCBPAP   | 0.0086 | 1.0199 |
| 31044 | C09 | 1695  | 91689  | C22orf32  | 0.0086 | 1.0200 |
| 11003 | G06 | 214   | 7072   | TIA1      | 0.0086 | 1.0200 |
| 51024 | G04 | 55199 | 3643   | INSR      | 0.0086 | 1.0200 |
| 31014 | E09 | 12197 | 2515   | ADAM2     | 0.0086 | 1.0200 |
| 11015 | D03 | 7548  | 171546 | C14orf147 | 0.0086 | 1.0201 |
| 31004 | C07 | 10814 | 126382 | NR2C2AP   | 0.0086 | 1.0201 |
| 31038 | H10 | 6809  | 51205  | ACP6      | 0.0087 | 1.0202 |
| 51032 | B02 | 56490 | 245938 | DEFB125   | 0.0087 | 1.0202 |
| 11027 | E10 | 3983  | 4259   | MGST3     | 0.0087 | 1.0203 |
| 11006 | A06 | 5252  | 5692   | PSMB4     | 0.0087 | 1.0203 |
| 31007 | D12 | 11458 | 2012   | EMP1      | 0.0087 | 1.0203 |
| 51032 | G10 | 55239 | 29100  | TMEM208   | 0.0088 | 1.0204 |
| 11056 | H11 | 2215  | 3670   | ISL1      | 0.0088 | 1.0204 |
| 11043 | E06 | 6588  | 11034  | DSTN      | 0.0088 | 1.0205 |
| 11075 | H06 | 2171  | 29887  | SNX10     | 0.0088 | 1.0206 |
| 51034 | B09 | 54961 | 253512 | SLC25A30  | 0.0088 | 1.0206 |
| 31039 | H06 | 8797  | 84939  | MUM1      | 0.0089 | 1.0206 |
| 31022 | E10 | 13750 | 54998  | AURKAIP1  | 0.0089 | 1.0206 |
| 11052 | E11 | 824   | 4223   | MEOX2     | 0.0089 | 1.0207 |
| 31001 | G05 | 10799 | 9021   | SOCS3     | 0.0089 | 1.0207 |
| 11043 | C04 | 9059  | 9522   | SCAMP1    | 0.0089 | 1.0207 |
| 31008 | B01 | 11595 | 84681  | HINT2     | 0.0089 | 1.0208 |
| 11074 | H10 | 1126  | 55281  | TMEM140   | 0.0089 | 1.0208 |
| 51003 | D04 | 54500 | 348801 | LNP1      | 0.0090 | 1.0209 |
| 11071 | A11 | 1757  | 6575   | SLC20A2   | 0.0090 | 1.0209 |
| 31018 | B12 | 12856 | 79663  | HSPBAP1   | 0.0090 | 1.0209 |

|       |     |       |        |          |        |        |
|-------|-----|-------|--------|----------|--------|--------|
| 51001 | E04 | 52642 | 114038 | C21orf84 | 0.0090 | 1.0210 |
| 11075 | A02 | 1235  | 51440  | HPCAL4   | 0.0090 | 1.0210 |
| 11005 | E12 | 550   | 10653  | SPINT2   | 0.0091 | 1.0211 |
| 11010 | A01 | 6666  | 5605   | MAP2K2   | 0.0091 | 1.0211 |
| 11079 | G07 | 9398  | 23360  | FNBP4    | 0.0091 | 1.0211 |
| 11074 | F05 | 3828  | 64432  | MRPS25   | 0.0091 | 1.0212 |
| 11001 | A05 | 1789  | 27445  | PCLO     | 0.0091 | 1.0212 |
| 11053 | H01 | 5136  | 57016  | AKR1B10  | 0.0092 | 1.0213 |
| 11062 | F04 | 9647  | 92714  | ARRDC1   | 0.0092 | 1.0213 |
| 31028 | C12 | 14384 | 54556  | ING3     | 0.0092 | 1.0213 |
| 11080 | C02 | 7199  | 8437   | RASAL1   | 0.0092 | 1.0214 |
| 31031 | A05 | 14505 | 10094  | ARPC3    | 0.0092 | 1.0214 |
| 51001 | G08 | 54591 | 81606  | LBH      | 0.0092 | 1.0214 |
| 11066 | H04 | 692   | 7296   | TXNRD1   | 0.0092 | 1.0215 |
| 11050 | A08 | 1059  | 116039 | OSR2     | 0.0093 | 1.0216 |
| 11028 | G03 | 8486  | 114757 | CYGB     | 0.0093 | 1.0216 |
| 11088 | C01 | 9959  | 6156   | RPL30    | 0.0093 | 1.0217 |
| 31005 | D01 | 11034 | 192669 | EIF2C3   | 0.0093 | 1.0217 |
| 31040 | C01 | 1280  | 127281 | C1orf93  | 0.0093 | 1.0217 |
| 11027 | E01 | 9807  | 10060  | ABCC9    | 0.0093 | 1.0217 |
| 11081 | G10 | 8807  | 57787  | MARK4    | 0.0093 | 1.0217 |
| 11027 | B05 | 156   | 10438  | C1D      | 0.0094 | 1.0218 |
| 11065 | G09 | 6920  | 221960 | C7orf28B | 0.0094 | 1.0218 |
| 31024 | B01 | 13373 | 10244  | RABEPK   | 0.0094 | 1.0219 |
| 31043 | H01 | 7112  | 114984 | FLYWCH2  | 0.0094 | 1.0219 |
| 11077 | G01 | 2594  | 8216   | LZTR1    | 0.0094 | 1.0219 |
| 51030 | F09 | 55354 | 84240  | ZCCHC9   | 0.0094 | 1.0219 |
| 11087 | F01 | 3151  | 10922  | FASTK    | 0.0094 | 1.0220 |
| 51010 | C12 | 53465 | 219972 | MPEG1    | 0.0095 | 1.0220 |
| 11037 | B03 | 8018  | 7283   | TUBG1    | 0.0095 | 1.0220 |
| 51004 | E02 | 54974 | 440087 | C12orf69 | 0.0095 | 1.0221 |
| 11024 | D08 | 3419  | 2131   | EXT1     | 0.0095 | 1.0221 |
| 51028 | A11 | 56479 | 149483 | CCDC17   | 0.0095 | 1.0221 |
| 11051 | B08 | 6186  | 51131  | PHF11    | 0.0095 | 1.0221 |
| 11007 | C05 | 6649  | 81926  | FAM108A1 | 0.0095 | 1.0222 |
| 51013 | A03 | 52829 | 57216  | VANGL2   | 0.0095 | 1.0222 |
| 51010 | D03 | 53831 | 56125  | PCDHB11  | 0.0095 | 1.0222 |
| 51027 | H06 | 55535 | 9441   | MED26    | 0.0096 | 1.0222 |
| 11066 | D04 | 521   | 85313  | PPIL4    | 0.0096 | 1.0223 |
| 31006 | E09 | 11008 | 5987   | TRIM27   | 0.0096 | 1.0224 |
| 31005 | H01 | 11047 | 92335  | STRADA   | 0.0096 | 1.0224 |
| 11063 | H02 | 4973  | 26003  | GORASP2  | 0.0096 | 1.0224 |
| 31006 | D12 | 11290 | 50507  | NOX4     | 0.0096 | 1.0224 |
| 31024 | E04 | 13451 | 23542  | MAPK8IP2 | 0.0096 | 1.0224 |

|       |     |       |        |            |        |        |
|-------|-----|-------|--------|------------|--------|--------|
| 11081 | A10 | 6382  | 55090  | MED9       | 0.0096 | 1.0225 |
| 51035 | E03 | 55050 | 343263 | MYBPHL     | 0.0097 | 1.0225 |
| 31011 | H10 | 12164 | 116362 | RBP7       | 0.0097 | 1.0225 |
| 11076 | H10 | 3901  | 4595   | MUTYH      | 0.0097 | 1.0225 |
| 11028 | E04 | 6640  | 64792  | RABL5      | 0.0097 | 1.0226 |
| 31018 | F01 | 12913 | 27128  | CYTH4      | 0.0097 | 1.0226 |
| 31036 | B12 | 11912 | 2888   | GRB14      | 0.0097 | 1.0227 |
| 31003 | D04 | 10584 | 2983   | GUCY1B3    | 0.0097 | 1.0227 |
| 51029 | D11 | 55674 | 284904 | SEC14L4    | 0.0097 | 1.0227 |
| 11058 | G04 | 6696  | 79827  | ASAM       | 0.0097 | 1.0227 |
| 11061 | B07 | 2322  | 168417 | ZNF679     | 0.0098 | 1.0227 |
| 11077 | F06 | 1447  | 4534   | MTM1       | 0.0098 | 1.0227 |
| 31024 | C09 | 13592 | 3851   | KRT4       | 0.0098 | 1.0228 |
| 11051 | C12 | 1670  | 84365  | MKI67IP    | 0.0098 | 1.0228 |
| 11004 | F04 | 729   | 10148  | EBI3       | 0.0098 | 1.0228 |
| 11050 | H03 | 9381  | 10738  | RFPL3      | 0.0098 | 1.0229 |
| 11013 | C05 | 5441  | 22827  | PUF60      | 0.0098 | 1.0229 |
| 11046 | C08 | 6933  | 5864   | RAB3A      | 0.0098 | 1.0229 |
| 11052 | E02 | 2414  | 1774   | DNASE1L1   | 0.0098 | 1.0229 |
| 11073 | E06 | 8887  | 27131  | SNX5       | 0.0098 | 1.0229 |
| 11061 | B12 | 8045  | 79844  | ZDHHC11    | 0.0098 | 1.0229 |
| 11077 | A09 | 293   | 56001  | NXF2       | 0.0098 | 1.0229 |
| 11056 | H08 | 8398  | 2819   | GPD1       | 0.0098 | 1.0229 |
| 11066 | F12 | 1940  | 159163 | RBMY1F     | 0.0099 | 1.0229 |
| 51031 | E05 | 55585 | 2946   | GSTM2      | 0.0099 | 1.0230 |
| 11067 | F01 | 1539  | 206426 | PIP5K1P1   | 0.0099 | 1.0231 |
| 51003 | E11 | 53041 | 147650 | NCRNA00085 | 0.0099 | 1.0231 |
| 31005 | F09 | 11316 | 338872 | C1QTNF9    | 0.0099 | 1.0232 |
| 51005 | A03 | 54344 | 58511  | DNASE2B    | 0.0100 | 1.0232 |
| 11015 | D04 | 7787  | 9315   | C5orf13    | 0.0100 | 1.0232 |
| 31032 | E04 | 14569 | 2615   | LRRC32     | 0.0100 | 1.0233 |
| 11004 | D10 | 8591  | 28227  | PPP2R3B    | 0.0100 | 1.0233 |
| 51006 | C09 | 54223 | 3781   | KCNN2      | 0.0100 | 1.0233 |
| 11080 | C09 | 1715  | 55818  | KDM3A      | 0.0100 | 1.0233 |
| 31043 | G05 | 6446  | 51614  | ERGIC3     | 0.0100 | 1.0234 |
| 11003 | D02 | 5444  | 55245  | UQCC       | 0.0100 | 1.0234 |
| 11073 | F06 | 3783  | 5435   | POLR2F     | 0.0100 | 1.0234 |
| 31041 | C07 | 7184  | 6535   | SLC6A8     | 0.0101 | 1.0234 |
| 11068 | B08 | 5039  | 55278  | QRSL1      | 0.0101 | 1.0234 |
| 31043 | C05 | 6276  | 55742  | PARVA      | 0.0101 | 1.0235 |
| 11040 | H08 | 9060  | 1479   | CSTF3      | 0.0101 | 1.0235 |
| 51024 | H10 | 53601 | 5787   | PTPRB      | 0.0101 | 1.0235 |
| 11084 | F03 | 9623  | 114908 | TMEM123    | 0.0102 | 1.0237 |
| 31011 | C11 | 12369 | 116541 | MRPL54     | 0.0102 | 1.0237 |

|       |     |       |        |           |        |        |
|-------|-----|-------|--------|-----------|--------|--------|
| 51014 | G07 | 52817 | 653404 | FOXD4L6   | 0.0102 | 1.0237 |
| 11088 | H11 | 302   | 30827  | CXXC1     | 0.0102 | 1.0237 |
| 31041 | C05 | 7008  | 26090  | ABHD12    | 0.0102 | 1.0238 |
| 11005 | F03 | 2763  | 140462 | ASB9      | 0.0102 | 1.0238 |
| 11062 | F06 | 1453  | 221154 | EFHA1     | 0.0102 | 1.0238 |
| 11077 | A06 | 845   | 8732   | RNGTT     | 0.0103 | 1.0239 |
| 11061 | A11 | 1140  | 5274   | SERPINI1  | 0.0103 | 1.0240 |
| 11005 | F07 | 611   | 5621   | PRNP      | 0.0103 | 1.0240 |
| 11075 | B06 | 4539  | 54769  | DIRAS2    | 0.0103 | 1.0240 |
| 31032 | D04 | 14655 | 2130   | EWSR1     | 0.0103 | 1.0241 |
| 31045 | A09 | 3369  | 438    | ASMT      | 0.0104 | 1.0242 |
| 11005 | F02 | 8667  | 2729   | GCLC      | 0.0104 | 1.0242 |
| 11050 | A01 | 2814  | 91283  | C9orf30   | 0.0104 | 1.0242 |
| 11040 | C02 | 7553  | 171546 | C14orf147 | 0.0104 | 1.0242 |
| 11018 | A02 | 6328  | 4151   | MB        | 0.0104 | 1.0243 |
| 11022 | C09 | 7128  | 23237  | ARC       | 0.0104 | 1.0243 |
| 51021 | D07 | 56624 | 54901  | CDKAL1    | 0.0104 | 1.0243 |
| 11062 | C12 | 5800  | 5671   | PSG3      | 0.0104 | 1.0243 |
| 11036 | B10 | 6999  | 89891  | WDR34     | 0.0104 | 1.0243 |
| 11060 | E03 | 1958  | 1497   | CTNS      | 0.0104 | 1.0243 |
| 11018 | H07 | 7811  | 51237  | MGC29506  | 0.0104 | 1.0243 |
| 31036 | E02 | 10750 | 9772   | KIAA0195  | 0.0104 | 1.0243 |
| 51024 | G08 | 56227 | 547    | KIF1A     | 0.0105 | 1.0244 |
| 11005 | C08 | 650   | 26063  | DECR2     | 0.0105 | 1.0244 |
| 11056 | B07 | 358   | 1508   | CTSB      | 0.0105 | 1.0244 |
| 11084 | G08 | 7241  | 9093   | DNAJA3    | 0.0105 | 1.0245 |
| 51032 | A09 | 53299 | 400657 | LOC400657 | 0.0105 | 1.0245 |
| 11013 | D07 | 4905  | 8733   | GPAA1     | 0.0105 | 1.0246 |
| 11085 | C10 | 6450  | 8092   | ALX1      | 0.0105 | 1.0246 |
| 11049 | F02 | 857   | 8061   | FOSL1     | 0.0105 | 1.0246 |
| 11047 | F05 | 5558  | 55335  | NIPSNAP3B | 0.0106 | 1.0247 |
| 51028 | D12 | 53300 | 390535 | GOLGA8E   | 0.0106 | 1.0247 |
| 51027 | A04 | 56220 | 255189 | PLA2G4F   | 0.0106 | 1.0247 |
| 51028 | B10 | 55569 | 5753   | PTK6      | 0.0106 | 1.0247 |
| 51005 | H01 | 53591 | 51666  | ASB4      | 0.0107 | 1.0249 |
| 11058 | F03 | 1512  | 57821  | C1orf114  | 0.0107 | 1.0249 |
| 51027 | G10 | 56842 | 29890  | RBM15B    | 0.0107 | 1.0249 |
| 11075 | A04 | 877   | 115761 | ARL11     | 0.0107 | 1.0250 |
| 11041 | E02 | 1036  | 118487 | CHCHD1    | 0.0107 | 1.0250 |
| 11039 | C07 | 5158  | 1936   | EEF1D     | 0.0107 | 1.0250 |
| 11067 | H06 | 9298  | 84254  | CAMKK1    | 0.0108 | 1.0251 |
| 31007 | B12 | 11339 | 144423 | GLT1D1    | 0.0108 | 1.0251 |
| 11079 | B08 | 2957  | 10940  | POP1      | 0.0108 | 1.0251 |
| 31001 | G06 | 10425 | 340481 | ZDHHC21   | 0.0108 | 1.0252 |



|       |     |       |        |           |        |        |
|-------|-----|-------|--------|-----------|--------|--------|
| 51021 | F10 | 55865 | 131377 | KBTBD5    | 0.0108 | 1.0252 |
| 31041 | C09 | 4699  | 9540   | TP53I3    | 0.0108 | 1.0253 |
| 11046 | A10 | 2589  | 55660  | PRPF40A   | 0.0108 | 1.0253 |
| 31006 | A11 | 11199 | 5746   | PTH2R     | 0.0108 | 1.0253 |
| 11061 | H02 | 8103  | 163154 | PRR22     | 0.0109 | 1.0253 |
| 11014 | H06 | 524   | 55209  | SETD5     | 0.0109 | 1.0253 |
| 31015 | C09 | 12804 | 89853  | FAM125B   | 0.0109 | 1.0253 |
| 11019 | B01 | 6092  | 10201  | NME6      | 0.0109 | 1.0254 |
| 11063 | H07 | 1692  | 57515  | SERINC1   | 0.0109 | 1.0254 |
| 11071 | A05 | 9676  | 222229 | LRWD1     | 0.0109 | 1.0254 |
| 11020 | F12 | 5699  | 25934  | NIPSNAP3A | 0.0109 | 1.0255 |
| 31007 | H01 | 10947 | 9892   | SNAP91    | 0.0109 | 1.0255 |
| 11019 | G08 | 7473  | 2954   | GSTZ1     | 0.0109 | 1.0255 |
| 51013 | D08 | 54836 | 163479 | FNDC7     | 0.0110 | 1.0256 |
| 11049 | F10 | 6155  | 63898  | SH2D4A    | 0.0110 | 1.0256 |
| 11014 | H02 | 90    | 64857  | PLEKHG2   | 0.0110 | 1.0256 |
| 31041 | B01 | 6463  | 115992 | RNF166    | 0.0110 | 1.0256 |
| 11017 | A02 | 5692  | 91894  | C11orf52  | 0.0110 | 1.0256 |
| 31016 | F06 | 12812 | 64805  | P2RY12    | 0.0110 | 1.0256 |
| 11017 | D01 | 3328  | 27257  | LSM1      | 0.0110 | 1.0257 |
| 11016 | H07 | 5414  | 2355   | FOSL2     | 0.0110 | 1.0258 |
| 51003 | D08 | 54986 | 5119   | CHMP1A    | 0.0111 | 1.0258 |
| 11015 | D06 | 4704  | 6234   | RPS28     | 0.0111 | 1.0258 |
| 51009 | D10 | 53752 | 285966 | FAM115C   | 0.0111 | 1.0259 |
| 11004 | F12 | 721   | 7347   | UCHL3     | 0.0111 | 1.0259 |
| 51030 | A03 | 55411 | 64747  | MFSD1     | 0.0111 | 1.0259 |
| 11002 | E04 | 9937  | 9290   | GPR55     | 0.0111 | 1.0259 |
| 51024 | A07 | 56348 | 53905  | DUOX1     | 0.0111 | 1.0260 |
| 31033 | G06 | 14916 | 144363 | LYRM5     | 0.0112 | 1.0260 |
| 11082 | F01 | 2349  | NA     | NA        | 0.0112 | 1.0260 |
| 11042 | B07 | 6978  | 55652  | SLC48A1   | 0.0112 | 1.0261 |
| 11006 | C01 | 7292  | 23760  | PITPNB    | 0.0112 | 1.0261 |
| 11001 | G11 | 463   | 2043   | EPHA4     | 0.0112 | 1.0261 |
| 11017 | D07 | 6951  | 6218   | RPS17     | 0.0112 | 1.0261 |
| 11012 | F03 | 6191  | 4204   | MECP2     | 0.0112 | 1.0261 |
| 11054 | E08 | 4430  | 10933  | MORF4L1   | 0.0112 | 1.0261 |
| 31006 | H11 | 11063 | 8444   | DYRK3     | 0.0112 | 1.0261 |
| 51024 | G01 | 53380 | 5924   | RASGRF2   | 0.0112 | 1.0262 |
| 11016 | B01 | 6354  | 3627   | CXCL10    | 0.0113 | 1.0263 |
| 51034 | A10 | 54682 | 84311  | MRPL45    | 0.0113 | 1.0263 |
| 11054 | B10 | 2837  | 91703  | ACY3      | 0.0113 | 1.0263 |
| 51035 | G02 | 53826 | 56970  | ATXN7L3   | 0.0113 | 1.0263 |
| 31013 | F10 | 12329 | 348995 | NUP43     | 0.0113 | 1.0263 |
| 11077 | B07 | 4629  | 5910   | RAP1GDS1  | 0.0113 | 1.0264 |

|       |     |       |        |           |        |        |
|-------|-----|-------|--------|-----------|--------|--------|
| 31039 | E12 | 2296  | 256130 | TMEM196   | 0.0113 | 1.0264 |
| 11019 | D07 | 7258  | 60490  | PPCDC     | 0.0113 | 1.0264 |
| 11064 | H06 | 7637  | 5199   | CFP       | 0.0113 | 1.0264 |
| 11017 | F07 | 9065  | 6504   | SLAMF1    | 0.0113 | 1.0265 |
| 51003 | F06 | 55583 | 11186  | RASSF1    | 0.0113 | 1.0265 |
| 11076 | F04 | 4892  | 991    | CDC20     | 0.0114 | 1.0265 |
| 11085 | A04 | 9851  | 23367  | LARP1     | 0.0114 | 1.0265 |
| 11046 | E02 | 3940  | 10280  | SIGMAR1   | 0.0114 | 1.0267 |
| 51032 | H11 | 54996 | 388182 | FLJ42289  | 0.0114 | 1.0267 |
| 11016 | D11 | 7737  | 119032 | C10orf32  | 0.0115 | 1.0267 |
| 31040 | H05 | 10200 | 9588   | PRDX6     | 0.0115 | 1.0267 |
| 31004 | D04 | 10357 | 55626  | AMBRA1    | 0.0115 | 1.0268 |
| 51010 | C06 | 54597 | 580    | BARD1     | 0.0115 | 1.0268 |
| 31002 | E06 | 10767 | 147111 | NOTUM     | 0.0115 | 1.0268 |
| 11077 | F11 | 4495  | 5598   | MAPK7     | 0.0115 | 1.0269 |
| 11052 | C09 | 5397  | 9987   | HNRPDL    | 0.0116 | 1.0270 |
| 31015 | E11 | 12729 | 79828  | METTL8    | 0.0116 | 1.0270 |
| 11059 | C11 | 3809  | 1848   | DUSP6     | 0.0116 | 1.0271 |
| 11074 | B02 | 1346  | 128653 | C20orf141 | 0.0116 | 1.0271 |
| 51005 | A11 | 54267 | 51091  | SEPSECS   | 0.0116 | 1.0271 |
| 31002 | A11 | 10350 | 5562   | PRKAA1    | 0.0116 | 1.0271 |
| 31001 | F09 | 10779 | 255488 | RNF144B   | 0.0116 | 1.0271 |
| 11029 | A10 | 3861  | 10124  | ARL4A     | 0.0116 | 1.0271 |
| 31036 | G11 | 12428 | 1455   | CSNK1G2   | 0.0116 | 1.0271 |
| 51003 | C02 | 52581 | 29989  | OBP2B     | 0.0116 | 1.0272 |
| 11058 | F07 | 6985  | 51244  | C3orf19   | 0.0117 | 1.0272 |
| 11007 | B01 | 7233  | 6811   | STX5      | 0.0117 | 1.0272 |
| 51012 | A10 | 54403 | 10781  | ZNF266    | 0.0117 | 1.0272 |
| 51001 | A02 | 52591 | 140851 | MT1P3     | 0.0117 | 1.0272 |
| 11061 | E03 | 4296  | 3185   | HNRNPF    | 0.0117 | 1.0273 |
| 51011 | D08 | 54539 | 148345 | C1orf127  | 0.0117 | 1.0273 |
| 51026 | D07 | 53336 | 441294 | CTAGE9    | 0.0117 | 1.0274 |
| 51035 | G09 | 53645 | 285268 | ZNF621    | 0.0117 | 1.0274 |
| 51014 | A11 | 52858 | 29906  | ST8SIA5   | 0.0117 | 1.0274 |
| 11015 | C01 | 5790  | NA     | NA        | 0.0117 | 1.0274 |
| 11009 | D12 | 6522  | 116138 | KLHDC3    | 0.0118 | 1.0274 |
| 51003 | E03 | 52605 | 130120 | REG3G     | 0.0118 | 1.0275 |
| 11074 | H08 | 2439  | 375    | ARF1      | 0.0118 | 1.0276 |
| 11073 | F10 | 4189  | 51255  | RNF181    | 0.0118 | 1.0276 |
| 11008 | C11 | 951   | 4705   | NDUFA10   | 0.0118 | 1.0277 |
| 11017 | E06 | 6044  | 51248  | PDZD11    | 0.0119 | 1.0277 |
| 51020 | A06 | 56775 | 2700   | GJA3      | 0.0119 | 1.0278 |
| 31033 | C09 | 14893 | 23047  | PDS5B     | 0.0119 | 1.0278 |
| 11052 | D07 | 6467  | 5082   | PDCL      | 0.0119 | 1.0279 |

|       |     |       |        |           |        |        |
|-------|-----|-------|--------|-----------|--------|--------|
| 31045 | C02 | 5995  | 10574  | CCT7      | 0.0120 | 1.0279 |
| 11002 | E09 | 10006 | 83937  | RASSF4    | 0.0120 | 1.0279 |
| 31044 | A08 | 7771  | 10523  | CHERP     | 0.0120 | 1.0281 |
| 31014 | B09 | 11862 | 84978  | FRMD5     | 0.0120 | 1.0281 |
| 11030 | D02 | 4572  | 10555  | AGPAT2    | 0.0120 | 1.0281 |
| 31042 | G02 | 6322  | 29895  | MYLPF     | 0.0120 | 1.0281 |
| 31008 | F04 | 11651 | 64342  | HS1BP3    | 0.0121 | 1.0281 |
| 11043 | C06 | 6364  | 55101  | ATP5SL    | 0.0121 | 1.0282 |
| 31008 | D06 | 11591 | 124808 | CCDC43    | 0.0121 | 1.0282 |
| 11030 | F11 | 3473  | 474343 | SPIN2B    | 0.0121 | 1.0283 |
| 11021 | A02 | 7615  | 3115   | HLA-DPB1  | 0.0121 | 1.0283 |
| 11043 | B09 | 4939  | 527    | ATP6V0C   | 0.0121 | 1.0283 |
| 11082 | B05 | 9038  | 220    | ALDH1A3   | 0.0122 | 1.0284 |
| 11005 | D11 | 3069  | 8800   | PEX11A    | 0.0122 | 1.0284 |
| 51012 | A02 | 52827 | 115669 | TTC6      | 0.0122 | 1.0284 |
| 11057 | B12 | 323   | 84108  | PCGF6     | 0.0122 | 1.0284 |
| 31001 | H04 | 10580 | 128414 | NKAIN4    | 0.0122 | 1.0284 |
| 51029 | C03 | 56464 | 151987 | PPP4R2    | 0.0122 | 1.0284 |
| 11027 | D02 | 759   | 6038   | RNASE4    | 0.0122 | 1.0285 |
| 11073 | H09 | 8629  | 79738  | BBS10     | 0.0122 | 1.0285 |
| 31038 | D09 | 8003  | 79140  | CCDC28B   | 0.0122 | 1.0285 |
| 11069 | A07 | 2627  | 2799   | GNS       | 0.0122 | 1.0286 |
| 11022 | A02 | 7689  | 80318  | GKAP1     | 0.0123 | 1.0286 |
| 11080 | D05 | 9638  | 116496 | FAM129A   | 0.0123 | 1.0286 |
| 11071 | F03 | 10135 | 156    | ADRBK1    | 0.0123 | 1.0287 |
| 51024 | H08 | 55136 | 80309  | SPHKAP    | 0.0123 | 1.0287 |
| 11062 | G02 | 2939  | 5770   | PTPN1     | 0.0123 | 1.0287 |
| 11018 | H04 | 7155  | 84065  | TMEM222   | 0.0123 | 1.0287 |
| 11035 | A10 | 3341  | 1152   | CKB       | 0.0123 | 1.0288 |
| 31021 | F02 | 12900 | 6777   | STAT5B    | 0.0123 | 1.0288 |
| 11007 | D11 | 6915  | 51109  | RDH11     | 0.0123 | 1.0288 |
| 31031 | F02 | 14523 | 130074 | FAM168B   | 0.0124 | 1.0289 |
| 11056 | F12 | 1492  | 1993   | ELAVL2    | 0.0124 | 1.0289 |
| 11028 | D02 | 7462  | 55256  | ADI1      | 0.0124 | 1.0290 |
| 11088 | B02 | 9424  | 80122  | YSK4      | 0.0124 | 1.0290 |
| 51032 | A12 | 55289 | 554249 | LOC554249 | 0.0124 | 1.0290 |
| 11055 | H03 | 1204  | 3775   | KCNK1     | 0.0124 | 1.0291 |
| 11027 | C09 | 3434  | 23641  | LDOC1     | 0.0124 | 1.0291 |
| 11009 | F03 | 5349  | 4673   | NAP1L1    | 0.0125 | 1.0291 |
| 11012 | F04 | 5855  | 3059   | HCLS1     | 0.0125 | 1.0291 |
| 11071 | E01 | 10013 | 23038  | WDTC1     | 0.0125 | 1.0292 |
| 31012 | F12 | 12391 | 58477  | SRPRB     | 0.0125 | 1.0292 |
| 51024 | D11 | 56301 | 9703   | KIAA0100  | 0.0125 | 1.0292 |
| 31014 | A05 | 11923 | 7112   | TMPO      | 0.0125 | 1.0292 |

|       |     |       |        |          |        |        |
|-------|-----|-------|--------|----------|--------|--------|
| 31017 | G05 | 12434 | 23397  | NCAPH    | 0.0125 | 1.0293 |
| 31015 | E09 | 12419 | 115098 | CCDC124  | 0.0125 | 1.0293 |
| 51031 | E12 | 55347 | 400629 | TEX19    | 0.0126 | 1.0293 |
| 31017 | F12 | 12882 | 28981  | IFT81    | 0.0126 | 1.0294 |
| 11082 | D11 | 9826  | 7032   | TFF2     | 0.0126 | 1.0294 |
| 51003 | A11 | 56435 | 401138 | AMTN     | 0.0126 | 1.0294 |
| 11065 | E06 | 7026  | 80325  | ABTB1    | 0.0126 | 1.0294 |
| 11018 | G03 | 6657  | 79706  | PRKRIP1  | 0.0126 | 1.0295 |
| 51015 | C03 | 52707 | 158866 | ZDHC15   | 0.0126 | 1.0295 |
| 51003 | B12 | 52741 | 83648  | FAM167A  | 0.0126 | 1.0295 |
| 11078 | A05 | 7709  | 4520   | MTF1     | 0.0126 | 1.0295 |
| 11053 | A11 | 1975  | 8851   | CDK5R1   | 0.0126 | 1.0295 |
| 11053 | E05 | 5904  | 8575   | PRKRA    | 0.0126 | 1.0296 |
| 11016 | E04 | 7549  | 2921   | CXCL3    | 0.0127 | 1.0296 |
| 11071 | C01 | 8383  | 23569  | PADI4    | 0.0127 | 1.0296 |
| 11040 | F08 | 7524  | 6613   | SUMO2    | 0.0127 | 1.0296 |
| 31019 | A10 | 13058 | 8650   | NUMB     | 0.0127 | 1.0297 |
| 11056 | B09 | 8044  | 171425 | CLYBL    | 0.0127 | 1.0297 |
| 11013 | C09 | 4452  | 7536   | SF1      | 0.0127 | 1.0297 |
| 11077 | G09 | 1669  | 1780   | DYNC111  | 0.0127 | 1.0297 |
| 31010 | D03 | 11816 | 7113   | TMPRSS2  | 0.0127 | 1.0298 |
| 11035 | E06 | 1351  | 414301 | DDI1     | 0.0127 | 1.0298 |
| 11046 | E05 | 2576  | 9144   | SYNGR2   | 0.0128 | 1.0298 |
| 11004 | F06 | 5754  | 91057  | CCDC34   | 0.0128 | 1.0298 |
| 11053 | C12 | 9741  | 79612  | NAA16    | 0.0128 | 1.0299 |
| 11021 | B02 | 5042  | 10772  | SRSF10   | 0.0128 | 1.0299 |
| 11069 | C07 | 8110  | 7920   | BAT5     | 0.0128 | 1.0299 |
| 11013 | H09 | 7433  | 55621  | TRMT1    | 0.0128 | 1.0300 |
| 11083 | G07 | 502   | 83998  | REG4     | 0.0129 | 1.0301 |
| 11043 | A08 | 5974  | 4637   | MYL6     | 0.0129 | 1.0301 |
| 11040 | F05 | 6385  | 6373   | CXCL11   | 0.0129 | 1.0301 |
| 31025 | B11 | 13801 | 56477  | CCL28    | 0.0129 | 1.0301 |
| 11079 | A08 | 10026 | 9754   | STARD8   | 0.0129 | 1.0301 |
| 11066 | H08 | 2158  | 57125  | PLXDC1   | 0.0129 | 1.0301 |
| 31039 | A09 | 863   | 80863  | PRRT1    | 0.0129 | 1.0302 |
| 31018 | D02 | 13119 | 8649   | MAPKSP1  | 0.0129 | 1.0302 |
| 11012 | B04 | 2687  | 435    | ASL      | 0.0130 | 1.0303 |
| 11049 | F01 | 3839  | 28959  | TMEM176B | 0.0130 | 1.0303 |
| 31005 | C09 | 10858 | 158234 | RG9MTD3  | 0.0130 | 1.0303 |
| 31037 | H01 | 12292 | 8761   | PABPC4   | 0.0130 | 1.0303 |
| 51021 | G03 | 56632 | 353299 | RGSL1    | 0.0130 | 1.0303 |
| 11085 | G09 | 2671  | 134285 | TMEM171  | 0.0130 | 1.0303 |
| 31027 | A11 | 14223 | 55615  | PRR5     | 0.0130 | 1.0303 |
| 11046 | B03 | 10022 | 55676  | SLC30A6  | 0.0130 | 1.0305 |

|       |     |       |        |           |        |        |
|-------|-----|-------|--------|-----------|--------|--------|
| 11009 | A05 | 3072  | 51094  | ADIPOR1   | 0.0130 | 1.0305 |
| 51032 | G04 | 56658 | 84314  | TMEM107   | 0.0130 | 1.0305 |
| 11066 | C02 | 6844  | 54758  | KLHDC4    | 0.0131 | 1.0305 |
| 11008 | E09 | 608   | 60     | ACTB      | 0.0131 | 1.0306 |
| 51005 | D06 | 54012 | 6754   | SSTR4     | 0.0131 | 1.0306 |
| 31028 | H01 | 15022 | 23042  | PDXDC1    | 0.0131 | 1.0306 |
| 31028 | B08 | 14152 | 10351  | ABCA8     | 0.0131 | 1.0307 |
| 11075 | H07 | 4358  | 83707  | TRPT1     | 0.0131 | 1.0307 |
| 11053 | E11 | 4548  | 51368  | TEX264    | 0.0131 | 1.0307 |
| 11026 | D12 | 3     | 10282  | BET1      | 0.0132 | 1.0308 |
| 51023 | F01 | 56200 | 159686 | CCDC147   | 0.0132 | 1.0308 |
| 31040 | F03 | 10098 | NA     | NA        | 0.0132 | 1.0309 |
| 11084 | C10 | 4811  | 51308  | REEP2     | 0.0132 | 1.0309 |
| 11060 | F01 | 8135  | 11278  | KLF12     | 0.0132 | 1.0309 |
| 31004 | H01 | 10399 | 261734 | NPHP4     | 0.0132 | 1.0309 |
| 11056 | C08 | 3050  | 59277  | NTN4      | 0.0132 | 1.0309 |
| 11063 | A04 | 9917  | 10875  | FGL2      | 0.0132 | 1.0309 |
| 31042 | A06 | 6697  | NA     | NA        | 0.0132 | 1.0310 |
| 11022 | C10 | 7577  | 5270   | SERPINE2  | 0.0133 | 1.0310 |
| 11076 | A01 | 5923  | 23421  | ITGB3BP   | 0.0133 | 1.0310 |
| 11028 | E03 | 3317  | 2739   | GLO1      | 0.0133 | 1.0311 |
| 11054 | B06 | 5925  | 9191   | DEDD      | 0.0133 | 1.0311 |
| 31034 | G02 | 14846 | 79368  | FCRL2     | 0.0133 | 1.0311 |
| 11052 | D03 | 6744  | 788    | SLC25A20  | 0.0133 | 1.0312 |
| 11005 | E07 | 1276  | 7102   | TSPAN7    | 0.0133 | 1.0312 |
| 11003 | A02 | 8395  | 912    | CD1D      | 0.0133 | 1.0312 |
| 11012 | G04 | 6134  | 84705  | GTPBP3    | 0.0134 | 1.0312 |
| 31037 | F07 | 13745 | 201294 | UNC13D    | 0.0134 | 1.0313 |
| 51021 | E08 | 55837 | 9058   | SLC13A2   | 0.0134 | 1.0314 |
| 11059 | H09 | 7758  | 6318   | SERPINB4  | 0.0134 | 1.0314 |
| 11045 | A02 | 6680  | 637    | BID       | 0.0134 | 1.0314 |
| 11047 | B10 | 4327  | 5721   | PSME2     | 0.0135 | 1.0315 |
| 11012 | A12 | 4011  | 7756   | ZNF207    | 0.0135 | 1.0315 |
| 11017 | G07 | 6116  | 55052  | MRPL20    | 0.0135 | 1.0315 |
| 51024 | E08 | 55165 | 5286   | PIK3C2A   | 0.0135 | 1.0315 |
| 11030 | E02 | 6743  | 3958   | LGALS3    | 0.0135 | 1.0316 |
| 11015 | B01 | 5429  | 84847  | MGC16075  | 0.0135 | 1.0316 |
| 31017 | H06 | 12490 | 85302  | FBF1      | 0.0135 | 1.0316 |
| 51034 | C04 | 53774 | 786    | CACNG1    | 0.0135 | 1.0316 |
| 51025 | F02 | 53273 | 51735  | RAPGEF6   | 0.0135 | 1.0317 |
| 11048 | G08 | 271   | 124995 | MRPL10    | 0.0136 | 1.0317 |
| 11062 | B03 | 9330  | 146434 | ZNF597    | 0.0136 | 1.0317 |
| 11081 | D07 | 6393  | 10063  | COX17     | 0.0136 | 1.0317 |
| 51001 | F02 | 53110 | 440419 | LOC440419 | 0.0136 | 1.0317 |

|       |     |       |        |           |        |        |
|-------|-----|-------|--------|-----------|--------|--------|
| 31012 | D11 | 12111 | 6856   | SYPL1     | 0.0136 | 1.0318 |
| 11032 | D06 | 9449  | 81030  | ZBP1      | 0.0136 | 1.0318 |
| 11019 | C04 | 6816  | 8407   | TAGLN2    | 0.0136 | 1.0318 |
| 11011 | F10 | 707   | 58472  | SQRDL     | 0.0136 | 1.0319 |
| 31018 | F08 | 13071 | 9936   | CD302     | 0.0137 | 1.0319 |
| 31030 | A09 | 14285 | 27300  | ZNF544    | 0.0137 | 1.0320 |
| 51035 | G05 | 53965 | 6598   | SMARCB1   | 0.0137 | 1.0320 |
| 11002 | C01 | 9958  | 5015   | OTX2      | 0.0137 | 1.0321 |
| 51029 | D08 | 56553 | 5161   | PDHA2     | 0.0137 | 1.0321 |
| 51024 | G11 | 55219 | 7011   | TEP1      | 0.0137 | 1.0322 |
| 51032 | A01 | 56899 | 440603 | BCL2L15   | 0.0138 | 1.0322 |
| 11022 | F10 | 7828  | 64840  | PORCN     | 0.0138 | 1.0322 |
| 11084 | B12 | 3135  | 3028   | HSD17B10  | 0.0138 | 1.0323 |
| 11066 | E06 | 1068  | 79745  | CLIP4     | 0.0138 | 1.0324 |
| 51030 | A06 | 56505 | 8383   | OR1A1     | 0.0139 | 1.0324 |
| 51031 | F02 | 56561 | 375612 | LHFPL3    | 0.0139 | 1.0324 |
| 11066 | B02 | 8365  | 80022  | MYO15B    | 0.0139 | 1.0325 |
| 51011 | D04 | 53906 | 147686 | ZNF418    | 0.0139 | 1.0325 |
| 51010 | H06 | 52963 | 374308 | PTCHD3    | 0.0139 | 1.0325 |
| 11067 | E04 | 4522  | 2119   | ETV5      | 0.0139 | 1.0326 |
| 51031 | D07 | 53345 | 346157 | ZNF391    | 0.0140 | 1.0327 |
| 11070 | C06 | 9756  | 150209 | AIFM3     | 0.0140 | 1.0327 |
| 51001 | C04 | 54859 | 245934 | DEFB121   | 0.0140 | 1.0327 |
| 11028 | G11 | 3729  | 65003  | MRPL11    | 0.0140 | 1.0327 |
| 31039 | A05 | 687   | 3576   | IL8       | 0.0140 | 1.0327 |
| 11013 | C02 | 2417  | 250    | ALPP      | 0.0140 | 1.0328 |
| 11086 | B11 | 1330  | 6695   | SPOCK1    | 0.0140 | 1.0328 |
| 11001 | E10 | 2693  | 6286   | S100P     | 0.0140 | 1.0328 |
| 11067 | F11 | 9484  | 9057   | SLC7A6    | 0.0140 | 1.0328 |
| 51022 | D09 | 56056 | 27291  | C10orf28  | 0.0140 | 1.0329 |
| 31029 | A11 | 14355 | 5032   | P2RY11    | 0.0140 | 1.0329 |
| 31015 | G04 | 12515 | 122769 | PPIL5     | 0.0141 | 1.0329 |
| 11050 | F08 | 6162  | 55204  | GOLPH3L   | 0.0141 | 1.0329 |
| 11013 | C04 | 2726  | 29781  | NCAPH2    | 0.0141 | 1.0329 |
| 51003 | H08 | 52953 | 85352  | KIAA1644  | 0.0141 | 1.0331 |
| 11053 | G04 | 4734  | 84292  | WDR83     | 0.0141 | 1.0331 |
| 51006 | H11 | 54024 | 7161   | TP73      | 0.0142 | 1.0332 |
| 11069 | E03 | 8727  | 26098  | C10orf137 | 0.0142 | 1.0332 |
| 11077 | G06 | 1552  | 153745 | FAM71B    | 0.0142 | 1.0332 |
| 31044 | F04 | 4630  | 91304  | C19orf6   | 0.0142 | 1.0333 |
| 11068 | G08 | 7114  | 686    | BTD       | 0.0142 | 1.0333 |
| 31026 | E11 | 13881 | 50838  | TAS2R13   | 0.0142 | 1.0333 |
| 11032 | H05 | 10210 | 134637 | ADAT2     | 0.0142 | 1.0333 |
| 11045 | B05 | 8638  | 5330   | PLCB2     | 0.0142 | 1.0333 |

|       |     |       |        |           |        |        |
|-------|-----|-------|--------|-----------|--------|--------|
| 11072 | C04 | 2468  | 23321  | TRIM2     | 0.0143 | 1.0334 |
| 11018 | E03 | 7627  | 2275   | FHL3      | 0.0143 | 1.0334 |
| 11030 | G04 | 9718  | 83692  | CD99L2    | 0.0143 | 1.0335 |
| 11002 | F04 | 10177 | 8468   | FKBP6     | 0.0143 | 1.0335 |
| 31005 | D02 | 10821 | 283385 | MORN3     | 0.0143 | 1.0335 |
| 11089 | H04 | 1077  | 1478   | CSTF2     | 0.0143 | 1.0335 |
| 31039 | C06 | 2769  | 55856  | ACOT13    | 0.0143 | 1.0335 |
| 11038 | D02 | 5809  | 3838   | KPNA2     | 0.0143 | 1.0335 |
| 11056 | E12 | 3233  | 55577  | NAGK      | 0.0143 | 1.0336 |
| 11019 | B11 | 6449  | 8835   | SOCS2     | 0.0144 | 1.0336 |
| 51002 | C05 | 52601 | 3640   | INSL3     | 0.0144 | 1.0336 |
| 51006 | E08 | 54426 | 84914  | ZNF587    | 0.0144 | 1.0337 |
| 51032 | B10 | 55991 | 338588 | LOC338588 | 0.0144 | 1.0338 |
| 11040 | C12 | 5318  | 10432  | RBM14     | 0.0145 | 1.0338 |
| 11085 | C03 | 6761  | 873    | CBR1      | 0.0145 | 1.0339 |
| 11013 | F09 | 8317  | 174    | AFP       | 0.0145 | 1.0339 |
| 11001 | E02 | 2788  | 6277   | S100A6    | 0.0145 | 1.0339 |
| 11037 | C07 | 2621  | 285753 | C6orf182  | 0.0145 | 1.0340 |
| 31039 | H10 | 3249  | 55526  | DHTKD1    | 0.0145 | 1.0340 |
| 11005 | D02 | 257   | 65264  | UBE2Z     | 0.0145 | 1.0340 |
| 31011 | D03 | 11693 | 10507  | SEMA4D    | 0.0145 | 1.0341 |
| 11061 | F09 | 2840  | 57180  | ACTR3B    | 0.0146 | 1.0341 |
| 11046 | F10 | 987   | 50808  | AK3       | 0.0146 | 1.0342 |
| 11030 | B07 | 7967  | 10400  | PEMT      | 0.0146 | 1.0342 |
| 11035 | C02 | 3265  | 7260   | TSSC1     | 0.0146 | 1.0342 |
| 31004 | E12 | 11024 | 205    | AK4       | 0.0146 | 1.0342 |
| 31019 | H09 | 13010 | 149628 | PYHIN1    | 0.0146 | 1.0343 |
| 11049 | H04 | 1078  | 5090   | PBX3      | 0.0146 | 1.0343 |
| 11003 | E07 | 5535  | 51397  | COMMD10   | 0.0147 | 1.0343 |
| 11020 | G08 | 4980  | 83596  | BCL2L12   | 0.0147 | 1.0344 |
| 11013 | E06 | 6518  | 57038  | RARS2     | 0.0147 | 1.0344 |
| 31002 | D01 | 10598 | 387893 | SETD8     | 0.0147 | 1.0344 |
| 11003 | D06 | 5935  | 5880   | RAC2      | 0.0147 | 1.0344 |
| 11004 | H06 | 122   | 9482   | STX8      | 0.0147 | 1.0345 |
| 11028 | F03 | 5399  | 6757   | SSX2      | 0.0147 | 1.0345 |
| 11029 | D07 | 3471  | 1366   | CLDN7     | 0.0147 | 1.0345 |
| 51031 | E08 | 55553 | 387856 | C12orf68  | 0.0147 | 1.0345 |
| 11053 | B08 | 5155  | 9524   | TECR      | 0.0147 | 1.0345 |
| 51029 | C01 | 53248 | 957    | ENTPD5    | 0.0148 | 1.0346 |
| 11084 | D09 | 9373  | 131540 | ZDHHC19   | 0.0148 | 1.0346 |
| 11074 | A11 | 4051  | 1845   | DUSP3     | 0.0148 | 1.0346 |
| 11077 | F10 | 4851  | 25913  | POT1      | 0.0148 | 1.0346 |
| 11055 | A01 | 8584  | 2874   | GPS2      | 0.0148 | 1.0346 |
| 11085 | G11 | 2491  | 2597   | GAPDH     | 0.0148 | 1.0346 |

|       |     |       |        |          |        |        |
|-------|-----|-------|--------|----------|--------|--------|
| 11020 | B08 | 5056  | 85016  | C11orf70 | 0.0148 | 1.0347 |
| 11074 | E06 | 5456  | 51510  | CHMP5    | 0.0148 | 1.0347 |
| 51008 | G07 | 55016 | 9745   | ZNF536   | 0.0148 | 1.0347 |
| 31044 | D02 | 4230  | 80758  | PRR7     | 0.0148 | 1.0347 |
| 51014 | F09 | 53002 | 285429 | DCAF4L1  | 0.0148 | 1.0348 |
| 11058 | H03 | 3850  | 79230  | ZNF557   | 0.0148 | 1.0348 |
| 11051 | B04 | 3063  | 360    | AQP3     | 0.0149 | 1.0348 |
| 31038 | E03 | 14581 | 8968   | HIST1H3F | 0.0149 | 1.0348 |
| 51001 | D03 | 53561 | 475    | ATOX1    | 0.0149 | 1.0349 |
| 31004 | B10 | 11151 | 28566  | TRBV21-1 | 0.0149 | 1.0349 |
| 51023 | E02 | 56696 | 57473  | ZNF512B  | 0.0149 | 1.0349 |
| 11057 | D07 | 6826  | 56941  | C3orf37  | 0.0149 | 1.0349 |
| 11077 | E09 | 2377  | 3936   | LCP1     | 0.0149 | 1.0350 |
| 11002 | H09 | 9369  | 23144  | ZC3H3    | 0.0149 | 1.0350 |
| 11042 | D08 | 4124  | 1058   | CENPA    | 0.0149 | 1.0350 |
| 31016 | H10 | 12754 | 91687  | CENPL    | 0.0150 | 1.0350 |
| 11013 | B04 | 6854  | 7464   | CORO2A   | 0.0150 | 1.0351 |
| 51018 | A10 | 55947 | 9350   | CER1     | 0.0150 | 1.0351 |
| 11082 | D08 | 3106  | 131118 | DNAJC19  | 0.0150 | 1.0352 |
| 11009 | E05 | 5297  | 7286   | TUFT1    | 0.0150 | 1.0352 |
| 11022 | C01 | 7832  | 57565  | KLHL14   | 0.0150 | 1.0352 |
| 31028 | A04 | 14174 | 1327   | COX4I1   | 0.0150 | 1.0352 |
| 11077 | B08 | 1631  | 146845 | WDR16    | 0.0150 | 1.0352 |
| 11062 | C02 | 8121  | 51447  | IP6K2    | 0.0150 | 1.0352 |
| 51024 | B05 | 55166 | 29028  | ATAD2    | 0.0150 | 1.0353 |
| 51005 | C02 | 53702 | 161291 | TMEM30B  | 0.0151 | 1.0353 |
| 51026 | A09 | 56821 | 4224   | MEP1A    | 0.0151 | 1.0354 |
| 31021 | A12 | 12934 | 6540   | SLC6A13  | 0.0151 | 1.0354 |
| 31004 | E06 | 11005 | 404220 | C6orf201 | 0.0151 | 1.0354 |
| 11008 | B11 | 684   | 468    | ATF4     | 0.0152 | 1.0355 |
| 11056 | B04 | 1638  | 93587  | RG9MTD2  | 0.0152 | 1.0355 |
| 11006 | D04 | 4827  | 244    | ANXA8L2  | 0.0152 | 1.0356 |
| 31022 | F09 | 13682 | 11163  | NUDT4    | 0.0152 | 1.0356 |
| 31044 | D05 | 3610  | 1113   | CHGA     | 0.0152 | 1.0356 |
| 51001 | F08 | 52798 | 284573 | C1orf157 | 0.0152 | 1.0357 |
| 11021 | C11 | 5111  | 3112   | HLA-DOB  | 0.0152 | 1.0357 |
| 31019 | C11 | 13066 | 8228   | PNPLA4   | 0.0153 | 1.0357 |
| 11052 | G09 | 2833  | 55812  | SPATA7   | 0.0153 | 1.0358 |
| 11003 | B11 | 5508  | 9521   | EEF1E1   | 0.0153 | 1.0358 |
| 11018 | C12 | 6329  | 1073   | CFL2     | 0.0153 | 1.0358 |
| 31036 | F11 | 12645 | 65125  | WNK1     | 0.0153 | 1.0358 |
| 31003 | D10 | 10466 | 55669  | MFN1     | 0.0153 | 1.0359 |
| 31006 | F11 | 11068 | 92689  | FAM114A1 | 0.0154 | 1.0360 |
| 11011 | F05 | 4804  | 5127   | CDK16    | 0.0154 | 1.0360 |



|       |     |       |        |          |        |        |
|-------|-----|-------|--------|----------|--------|--------|
| 11002 | B12 | 9768  | 125113 | KRT222   | 0.0154 | 1.0360 |
| 11017 | H02 | 6103  | 51142  | CHCHD2   | 0.0154 | 1.0360 |
| 31039 | B08 | 618   | 3315   | HSPB1    | 0.0154 | 1.0360 |
| 11041 | D04 | 1277  | 26749  | GAGE2E   | 0.0154 | 1.0361 |
| 51026 | A05 | 56420 | 30817  | EMR2     | 0.0154 | 1.0361 |
| 11070 | B02 | 7844  | 2870   | GRK6     | 0.0154 | 1.0361 |
| 11071 | F05 | 8238  | 25780  | RASGRP3  | 0.0154 | 1.0361 |
| 51028 | G02 | 55264 | 7568   | ZNF20    | 0.0154 | 1.0361 |
| 11041 | E05 | 6003  | 6923   | TCEB2    | 0.0154 | 1.0361 |
| 11027 | B08 | 5372  | 10907  | TXNL4A   | 0.0154 | 1.0361 |
| 51013 | B03 | 53568 | 154197 | PNLDC1   | 0.0154 | 1.0362 |
| 11052 | A09 | 5879  | 50848  | F11R     | 0.0155 | 1.0362 |
| 11039 | F08 | 2546  | 23117  | NPIPL3   | 0.0155 | 1.0362 |
| 11057 | H02 | 10160 | 3579   | CXCR2    | 0.0155 | 1.0363 |
| 51014 | C04 | 54238 | 93233  | CCDC114  | 0.0155 | 1.0363 |
| 11052 | D12 | 1694  | 2775   | GNAO1    | 0.0155 | 1.0364 |
| 11013 | B08 | 1295  | 130951 | C2orf65  | 0.0155 | 1.0364 |
| 11061 | F06 | 7210  | 7775   | ZNF232   | 0.0155 | 1.0365 |
| 11016 | A08 | 5619  | 1678   | TIMM8A   | 0.0155 | 1.0365 |
| 11076 | H08 | 1100  | 115209 | OMA1     | 0.0156 | 1.0365 |
| 51003 | F10 | 52593 | 338376 | IFNE     | 0.0156 | 1.0365 |
| 31039 | E09 | 1127  | 80219  | COQ10B   | 0.0156 | 1.0365 |
| 11002 | E11 | 8259  | 285600 | C5orf36  | 0.0156 | 1.0366 |
| 11069 | C08 | 8479  | 27132  | CPNE7    | 0.0156 | 1.0367 |
| 51027 | B12 | 55457 | 9627   | SNCAIP   | 0.0157 | 1.0367 |
| 11081 | A04 | 6416  | 3347   | HTN3     | 0.0157 | 1.0367 |
| 51025 | C08 | 56926 | 146183 | OTOA     | 0.0157 | 1.0368 |
| 11057 | B03 | 8332  | 9170   | LPAR2    | 0.0157 | 1.0368 |
| 11086 | B12 | 4053  | 84617  | TUBB6    | 0.0157 | 1.0368 |
| 11020 | E08 | 5276  | 10103  | TSPAN1   | 0.0157 | 1.0369 |
| 11007 | C03 | 1089  | 5516   | PPP2CB   | 0.0157 | 1.0369 |
| 11081 | F11 | 5354  | 83606  | C22orf13 | 0.0157 | 1.0369 |
| 11026 | F03 | 597   | 92359  | CRB3     | 0.0158 | 1.0369 |
| 51033 | D10 | 53575 | 150538 | FLJ32063 | 0.0158 | 1.0369 |
| 11012 | E09 | 8391  | 24138  | IFIT5    | 0.0158 | 1.0370 |
| 31021 | D05 | 13269 | 23029  | RBM34    | 0.0158 | 1.0370 |
| 31040 | B09 | 10169 | 158787 | RIBC1    | 0.0158 | 1.0370 |
| 31037 | G01 | 12098 | 4867   | NPHP1    | 0.0158 | 1.0370 |
| 51008 | G11 | 55171 | 23469  | PHF3     | 0.0158 | 1.0371 |
| 11025 | C08 | 10036 | 23327  | NEDD4L   | 0.0158 | 1.0372 |
| 51029 | H08 | 55296 | 2339   | FNTA     | 0.0159 | 1.0372 |
| 11018 | A12 | 6745  | 8905   | AP1S2    | 0.0159 | 1.0372 |
| 11041 | H04 | 8703  | 5802   | PTPRS    | 0.0159 | 1.0372 |
| 11075 | B01 | 4506  | 347    | APOD     | 0.0159 | 1.0373 |

|       |     |       |        |           |        |        |
|-------|-----|-------|--------|-----------|--------|--------|
| 11008 | H09 | 6307  | 51601  | LIPT1     | 0.0159 | 1.0373 |
| 11006 | E07 | 66    | 6607   | SMN2      | 0.0159 | 1.0374 |
| 11047 | F04 | 5427  | 8741   | TNFSF13   | 0.0159 | 1.0374 |
| 51030 | F02 | 53391 | 121643 | FOXN4     | 0.0159 | 1.0374 |
| 51020 | F07 | 55843 | 8808   | IL1RL2    | 0.0160 | 1.0374 |
| 11030 | B08 | 58    | 6432   | SRSF7     | 0.0160 | 1.0375 |
| 31021 | A05 | 12968 | 9476   | NAPSA     | 0.0160 | 1.0375 |
| 11082 | D03 | 5383  | 28955  | DEXI      | 0.0160 | 1.0375 |
| 51016 | A04 | 56110 | 7116   | TMSB4XP2  | 0.0160 | 1.0375 |
| 11030 | B02 | 4739  | 7083   | TK1       | 0.0160 | 1.0375 |
| 11081 | C12 | 4073  | 6232   | RPS27     | 0.0160 | 1.0375 |
| 11016 | A02 | 5964  | 6271   | S100A1    | 0.0160 | 1.0376 |
| 31045 | G01 | 2917  | 10817  | FRS3      | 0.0160 | 1.0376 |
| 11047 | C03 | 9799  | 57509  | MTUS1     | 0.0160 | 1.0376 |
| 11059 | F11 | 9702  | 5064   | PALM      | 0.0161 | 1.0377 |
| 11006 | B03 | 5365  | 10785  | WDR4      | 0.0161 | 1.0378 |
| 31033 | D04 | 14750 | 222962 | SLC29A4   | 0.0162 | 1.0380 |
| 11016 | B06 | 9062  | 10159  | ATP6AP2   | 0.0162 | 1.0380 |
| 31034 | D04 | 14981 | 158160 | HSD17B7P2 | 0.0162 | 1.0381 |
| 11016 | E07 | 6321  | 10563  | CXCL13    | 0.0162 | 1.0381 |
| 11087 | D02 | 3578  | 1717   | DHCR7     | 0.0162 | 1.0381 |
| 11005 | E03 | 801   | 7532   | YWHAG     | 0.0162 | 1.0381 |
| 11004 | B08 | 1804  | 23386  | NUCD3     | 0.0162 | 1.0381 |
| 11058 | C05 | 2784  | 78997  | GDAP1L1   | 0.0162 | 1.0381 |
| 51020 | F01 | 55798 | 10052  | GJC1      | 0.0162 | 1.0381 |
| 11066 | C06 | 9758  | 91452  | ACBD5     | 0.0163 | 1.0381 |
| 11068 | B02 | 10066 | 10492  | SYNCRIP   | 0.0163 | 1.0382 |
| 11075 | G11 | 4498  | 11014  | KDELR2    | 0.0163 | 1.0383 |
| 11070 | E01 | 10054 | 4048   | LTA4H     | 0.0163 | 1.0383 |
| 11059 | A08 | 5001  | 4690   | NCK1      | 0.0163 | 1.0383 |
| 11074 | F02 | 2260  | 203562 | TMEM31    | 0.0163 | 1.0383 |
| 11010 | F04 | 928   | 55696  | RBM22     | 0.0164 | 1.0384 |
| 31024 | F05 | 13489 | 93100  | NAPRT1    | 0.0164 | 1.0384 |
| 11009 | E01 | 5607  | 5706   | PSMC6     | 0.0164 | 1.0384 |
| 31008 | E10 | 11389 | 51285  | RASL12    | 0.0164 | 1.0384 |
| 51008 | A07 | 55215 | 182    | JAG1      | 0.0164 | 1.0384 |
| 11004 | G05 | 2680  | 54941  | RNF125    | 0.0164 | 1.0385 |
| 31016 | A03 | 12432 | 10736  | SIX2      | 0.0164 | 1.0385 |
| 11007 | B10 | 1213  | 8851   | CDK5R1    | 0.0164 | 1.0385 |
| 11075 | A07 | 4270  | 6876   | TAGLN     | 0.0164 | 1.0385 |
| 51011 | G06 | 54874 | 9108   | MTMR7     | 0.0165 | 1.0386 |
| 31017 | A05 | 13239 | 8671   | SLC4A4    | 0.0165 | 1.0386 |
| 31010 | G11 | 11514 | 8309   | ACOX2     | 0.0165 | 1.0386 |
| 31039 | A07 | 1189  | 57213  | C13orf1   | 0.0165 | 1.0386 |

|       |     |       |        |          |        |        |
|-------|-----|-------|--------|----------|--------|--------|
| 31025 | E05 | 13744 | 114881 | OSBPL7   | 0.0165 | 1.0386 |
| 11037 | A12 | 3708  | 51283  | BFAR     | 0.0165 | 1.0387 |
| 31014 | G06 | 11851 | 1196   | CLK2     | 0.0165 | 1.0387 |
| 51002 | C01 | 52566 | 24150  | TP53TG3  | 0.0165 | 1.0387 |
| 11052 | E10 | 280   | 840    | CASP7    | 0.0165 | 1.0388 |
| 51031 | D11 | 55329 | 84513  | PPAPDC1B | 0.0165 | 1.0388 |
| 31034 | D09 | 14887 | 79618  | HMBOX1   | 0.0165 | 1.0388 |
| 11013 | F10 | 862   | 5859   | QARS     | 0.0165 | 1.0388 |
| 51021 | G01 | 56797 | 83417  | FCRL4    | 0.0165 | 1.0388 |
| 31004 | H04 | 11182 | 170712 | COX7B2   | 0.0165 | 1.0388 |
| 11021 | E01 | 3810  | 10695  | CNPY3    | 0.0166 | 1.0389 |
| 31041 | B02 | 7646  | 79165  | LENG1    | 0.0166 | 1.0389 |
| 51023 | E10 | 54916 | 4606   | MYBPC2   | 0.0166 | 1.0389 |
| 11002 | F09 | 9416  | 22949  | PTGR1    | 0.0166 | 1.0390 |
| 51029 | B08 | 55677 | 83849  | SYT15    | 0.0166 | 1.0390 |
| 11086 | E09 | 8598  | 23001  | WDFY3    | 0.0166 | 1.0390 |
| 51015 | G11 | 52910 | 349136 | WDR86    | 0.0166 | 1.0390 |
| 11082 | F04 | 3615  | 3150   | HMGNI    | 0.0166 | 1.0390 |
| 11028 | C02 | 451   | 79002  | C19orf43 | 0.0166 | 1.0390 |
| 31010 | F07 | 11726 | 64506  | CPEB1    | 0.0166 | 1.0391 |
| 51035 | C06 | 53526 | 1960   | EGR3     | 0.0167 | 1.0391 |
| 31012 | A09 | 12004 | 255252 | LRRC57   | 0.0167 | 1.0391 |
| 11008 | H01 | 2736  | 1025   | CDK9     | 0.0167 | 1.0391 |
| 11072 | F10 | 1574  | 203102 | ADAM32   | 0.0167 | 1.0391 |
| 11069 | D01 | 9869  | 149499 | C1orf92  | 0.0167 | 1.0392 |
| 51032 | D09 | 55342 | 90737  | PAGE5    | 0.0167 | 1.0393 |
| 11053 | G03 | 2166  | 54810  | GIPC2    | 0.0168 | 1.0393 |
| 11058 | F09 | 5927  | 1271   | CNTFR    | 0.0168 | 1.0394 |
| 11028 | B10 | 9847  | 84316  | LSMD1    | 0.0168 | 1.0394 |
| 31005 | D04 | 11163 | 145282 | MIPOL1   | 0.0168 | 1.0394 |
| 11010 | F03 | 7923  | 2184   | FAH      | 0.0168 | 1.0394 |
| 31033 | C04 | 14681 | 526    | ATP6V1B2 | 0.0168 | 1.0394 |
| 51005 | G05 | 54518 | 1486   | CTBS     | 0.0168 | 1.0395 |
| 31037 | G06 | 14015 | 5563   | PRKAA2   | 0.0169 | 1.0396 |
| 31021 | F12 | 13457 | 388558 | ZNF808   | 0.0169 | 1.0396 |
| 11008 | C04 | 777   | 53947  | A4GALT   | 0.0169 | 1.0397 |
| 11074 | B10 | 4866  | 84529  | C15orf41 | 0.0169 | 1.0397 |
| 51003 | G11 | 52742 | 254773 | LYG2     | 0.0169 | 1.0398 |
| 31029 | H03 | 14318 | 65055  | REEP1    | 0.0170 | 1.0398 |
| 11081 | A08 | 8838  | 78990  | OTUB2    | 0.0170 | 1.0399 |
| 11011 | A06 | 4989  | 1983   | EIF5     | 0.0170 | 1.0399 |
| 51015 | C04 | 52887 | 3965   | LGALS9   | 0.0170 | 1.0400 |
| 11004 | F02 | 8058  | 84271  | POLDIP3  | 0.0170 | 1.0400 |
| 51031 | H09 | 55764 | 90655  | TGIF2LY  | 0.0170 | 1.0400 |

|       |     |       |        |          |        |        |
|-------|-----|-------|--------|----------|--------|--------|
| 31004 | B03 | 10319 | 26091  | HERC4    | 0.0170 | 1.0400 |
| 51006 | F01 | 54631 | 343068 | PRAMEF5  | 0.0171 | 1.0401 |
| 51013 | B08 | 527   | 51271  | UBAP1    | 0.0171 | 1.0401 |
| 31009 | E12 | 11407 | 2120   | ETV6     | 0.0171 | 1.0401 |
| 11087 | F05 | 7119  | 6714   | SRC      | 0.0171 | 1.0401 |
| 51011 | B03 | 54160 | 221074 | SLC39A12 | 0.0171 | 1.0401 |
| 11051 | B12 | 5031  | 7549   | ZNF2     | 0.0171 | 1.0402 |
| 51030 | E05 | 56935 | 401551 | WDR38    | 0.0171 | 1.0402 |
| 11024 | G07 | 10199 | 56121  | PCDHB15  | 0.0171 | 1.0402 |
| 11058 | A09 | 9996  | 5936   | RBM4     | 0.0171 | 1.0402 |
| 11058 | B06 | 4871  | 7286   | TUFT1    | 0.0171 | 1.0403 |
| 51035 | B08 | 53659 | 838    | CASP5    | 0.0171 | 1.0403 |
| 51013 | G06 | 53765 | 84735  | CNDP1    | 0.0172 | 1.0403 |
| 31032 | E02 | 14606 | 1551   | CYP3A7   | 0.0172 | 1.0403 |
| 11029 | H08 | 10123 | 257194 | NEGR1    | 0.0172 | 1.0404 |
| 11019 | E02 | 7821  | 57106  | NAT14    | 0.0172 | 1.0404 |
| 51025 | D07 | 55339 | 23239  | PHLPP1   | 0.0172 | 1.0404 |
| 31013 | A08 | 12384 | 29767  | TMOD2    | 0.0172 | 1.0404 |
| 11070 | G05 | 9844  | 7016   | TESK1    | 0.0172 | 1.0404 |
| 11029 | C12 | 3149  | 1397   | CRIP2    | 0.0172 | 1.0405 |
| 51034 | E04 | 54356 | 11159  | RABL2A   | 0.0172 | 1.0405 |
| 51034 | H09 | 55073 | 125061 | AFMID    | 0.0173 | 1.0405 |
| 11050 | C10 | 583   | 5510   | PPP1R7   | 0.0173 | 1.0406 |
| 31003 | G08 | 10636 | 2180   | ACSL1    | 0.0173 | 1.0406 |
| 11061 | C05 | 9971  | 9046   | DOK2     | 0.0173 | 1.0406 |
| 11027 | A08 | 3694  | 55629  | PNRC2    | 0.0173 | 1.0406 |
| 51035 | H02 | 54742 | 7066   | THPO     | 0.0173 | 1.0406 |
| 11016 | E01 | 3776  | 4725   | NDUFS5   | 0.0173 | 1.0407 |
| 51028 | C02 | 56878 | 11320  | MGAT4A   | 0.0173 | 1.0407 |
| 51006 | G10 | 54799 | 133060 | OTOP1    | 0.0173 | 1.0407 |
| 31002 | G01 | 10443 | 2781   | GNAZ     | 0.0173 | 1.0407 |
| 11022 | C05 | 7218  | 64795  | RMND5A   | 0.0173 | 1.0407 |
| 11022 | E02 | 7657  | 25809  | TTLL1    | 0.0173 | 1.0407 |
| 11068 | C02 | 10025 | 51602  | NOP58    | 0.0174 | 1.0408 |
| 11020 | G01 | 5547  | 5000   | ORC4L    | 0.0174 | 1.0409 |
| 11080 | F11 | 6615  | 23223  | RRP12    | 0.0174 | 1.0409 |
| 31006 | A10 | 11242 | 347730 | LRRTM1   | 0.0174 | 1.0409 |
| 11027 | A02 | 232   | 3021   | H3F3B    | 0.0174 | 1.0409 |
| 11076 | B11 | 4206  | 64852  | TUT1     | 0.0174 | 1.0409 |
| 11076 | A03 | 4432  | 55684  | C9orf86  | 0.0174 | 1.0409 |
| 51005 | D11 | 53789 | 9413   | FAM189A2 | 0.0174 | 1.0409 |
| 51003 | E02 | 56780 | 7697   | ZNF138   | 0.0174 | 1.0410 |
| 11043 | B06 | 5687  | 57456  | KIAA1143 | 0.0174 | 1.0410 |
| 31045 | H02 | 2759  | 54872  | PIGG     | 0.0175 | 1.0411 |

|       |     |       |        |           |        |        |
|-------|-----|-------|--------|-----------|--------|--------|
| 11047 | H03 | 4834  | 84311  | MRPL45    | 0.0175 | 1.0411 |
| 51009 | E01 | 52869 | 10699  | CORIN     | 0.0175 | 1.0411 |
| 11050 | G10 | 5926  | 3162   | HMOX1     | 0.0175 | 1.0412 |
| 11004 | C12 | 8132  | 4189   | DNAJB9    | 0.0175 | 1.0412 |
| 51010 | B09 | 53053 | 54535  | CCHCR1    | 0.0175 | 1.0412 |
| 11004 | G06 | 2048  | 143684 | FAM76B    | 0.0175 | 1.0412 |
| 11018 | B01 | 5164  | 6205   | RPS11     | 0.0176 | 1.0412 |
| 11005 | F01 | 8702  | 133688 | UGT3A1    | 0.0176 | 1.0413 |
| 31041 | B04 | 6927  | 64110  | MAGEF1    | 0.0176 | 1.0414 |
| 11010 | A02 | 3596  | 1431   | CS        | 0.0177 | 1.0416 |
| 31019 | A01 | 12868 | 7325   | UBE2E2    | 0.0177 | 1.0416 |
| 31008 | C02 | 11534 | 3574   | IL7       | 0.0177 | 1.0416 |
| 51013 | A05 | 53941 | 10524  | KAT5      | 0.0178 | 1.0417 |
| 11016 | F05 | 4696  | 8933   | FAM127A   | 0.0178 | 1.0418 |
| 11011 | F04 | 5408  | 55603  | FAM46A    | 0.0178 | 1.0418 |
| 11007 | C11 | 8459  | 443    | ASPA      | 0.0178 | 1.0418 |
| 11015 | E03 | 8874  | 58516  | FAM60A    | 0.0178 | 1.0419 |
| 11025 | B05 | 9463  | 27032  | ATP2C1    | 0.0178 | 1.0419 |
| 11010 | H05 | 7701  | 10494  | STK25     | 0.0178 | 1.0419 |
| 31003 | A10 | 10501 | 6867   | TACC1     | 0.0178 | 1.0419 |
| 11060 | G01 | 5037  | 84302  | C9orf125  | 0.0179 | 1.0420 |
| 11042 | B03 | 1530  | 89882  | TPD52L3   | 0.0179 | 1.0421 |
| 11001 | H07 | 354   | 142937 | LOC142937 | 0.0179 | 1.0421 |
| 11085 | E05 | 6085  | 64400  | AKTIP     | 0.0179 | 1.0422 |
| 11067 | C11 | 1423  | 4675   | NAPIL3    | 0.0180 | 1.0422 |
| 51030 | H11 | 55463 | 124093 | CCDC78    | 0.0180 | 1.0423 |
| 11022 | A03 | 7223  | 1731   | SEPT1     | 0.0180 | 1.0423 |
| 31032 | E11 | 14682 | 1594   | CYP27B1   | 0.0180 | 1.0423 |
| 11088 | B06 | 9395  | 93426  | SYCE1     | 0.0180 | 1.0423 |
| 51030 | B03 | 56466 | 80167  | C4orf29   | 0.0180 | 1.0423 |
| 11054 | E05 | 7354  | 79751  | SLC25A22  | 0.0180 | 1.0423 |
| 31007 | D11 | 11484 | 122553 | TRAPPC6B  | 0.0181 | 1.0425 |
| 11027 | B03 | 7440  | 10248  | POP7      | 0.0181 | 1.0425 |
| 11018 | H11 | 7645  | 90861  | HN1L      | 0.0181 | 1.0426 |
| 11053 | C02 | 1816  | 4331   | MNAT1     | 0.0181 | 1.0426 |
| 11048 | A07 | 124   | 112858 | TP53RK    | 0.0181 | 1.0426 |
| 11011 | F01 | 6201  | 26271  | FBXO5     | 0.0181 | 1.0426 |
| 51034 | B08 | 54555 | 9491   | PSMF1     | 0.0181 | 1.0426 |
| 11008 | A04 | 3602  | 10067  | SCAMP3    | 0.0181 | 1.0427 |
| 11001 | D12 | 541   | 28971  | C11orf67  | 0.0182 | 1.0427 |
| 11063 | F11 | 9970  | 85007  | AGXT2L2   | 0.0182 | 1.0427 |
| 11022 | D03 | 7137  | 26528  | DAZAP1    | 0.0182 | 1.0427 |
| 11050 | C12 | 2952  | 55172  | C14orf104 | 0.0182 | 1.0427 |
| 51035 | A06 | 55010 | 79815  | NIPAL2    | 0.0182 | 1.0428 |

|       |     |       |        |           |        |        |
|-------|-----|-------|--------|-----------|--------|--------|
| 11002 | B04 | 9233  | 9607   | CARTPT    | 0.0182 | 1.0428 |
| 11055 | H02 | 9592  | 85329  | LGALS12   | 0.0182 | 1.0428 |
| 31043 | C04 | 6141  | 79084  | WDR77     | 0.0182 | 1.0428 |
| 11057 | E06 | 2883  | 9486   | CHST10    | 0.0182 | 1.0428 |
| 11080 | F07 | 10190 | 7075   | TIE1      | 0.0182 | 1.0429 |
| 11078 | D04 | 7005  | 51586  | MED15     | 0.0183 | 1.0430 |
| 11004 | G04 | 149   | 54541  | DDIT4     | 0.0183 | 1.0430 |
| 11022 | A08 | 7695  | 282974 | STK32C    | 0.0183 | 1.0431 |
| 31038 | F07 | 9464  | 29851  | ICOS      | 0.0183 | 1.0431 |
| 51014 | D02 | 52787 | 166655 | TRIM60    | 0.0184 | 1.0432 |
| 51001 | A06 | 54931 | 284297 | SSC5D     | 0.0184 | 1.0432 |
| 31013 | E03 | 11869 | 57699  | CPNE5     | 0.0184 | 1.0432 |
| 11030 | C05 | 3290  | 9446   | GSTO1     | 0.0184 | 1.0432 |
| 11005 | F04 | 2061  | 6619   | SNAPC3    | 0.0184 | 1.0432 |
| 51033 | G01 | 55487 | 441212 | RP9P      | 0.0184 | 1.0433 |
| 11008 | B01 | 286   | 51099  | ABHD5     | 0.0184 | 1.0433 |
| 11010 | C09 | 633   | 7551   | ZNF3      | 0.0184 | 1.0433 |
| 11075 | C05 | 4493  | 10652  | YKT6      | 0.0184 | 1.0434 |
| 11015 | A07 | 7742  | 492311 | C5orf53   | 0.0184 | 1.0434 |
| 11069 | H07 | 2958  | 10443  | N4BP2L2   | 0.0185 | 1.0434 |
| 11007 | C12 | 313   | 115817 | DHRS1     | 0.0185 | 1.0434 |
| 11027 | B06 | 4690  | 4088   | SMAD3     | 0.0185 | 1.0435 |
| 11070 | F04 | 9468  | 3718   | JAK3      | 0.0185 | 1.0435 |
| 11047 | E12 | 4525  | 29883  | CNOT7     | 0.0185 | 1.0435 |
| 11045 | H03 | 811   | 10459  | MAD2L2    | 0.0185 | 1.0435 |
| 11066 | F02 | 2500  | 7988   | ZNF212    | 0.0185 | 1.0435 |
| 11004 | H11 | 8827  | 23265  | EXOC7     | 0.0185 | 1.0436 |
| 51008 | F12 | 53079 | 4940   | OAS3      | 0.0185 | 1.0436 |
| 51002 | E05 | 55021 | 440905 | LOC440905 | 0.0185 | 1.0436 |
| 11026 | A08 | 2847  | 2793   | GNGT2     | 0.0186 | 1.0437 |
| 51002 | G10 | 52610 | 27179  | IL1F6     | 0.0186 | 1.0438 |
| 11061 | B06 | 1517  | 54665  | RSBN1     | 0.0186 | 1.0438 |
| 11079 | B03 | 7464  | 11100  | HNRNPUL1  | 0.0186 | 1.0438 |
| 51014 | C03 | 52749 | 92949  | ADAMTSL1  | 0.0187 | 1.0439 |
| 51002 | C11 | 52562 | 6037   | RNASE3    | 0.0187 | 1.0439 |
| 11078 | F05 | 6503  | 7373   | COL14A1   | 0.0187 | 1.0440 |
| 51013 | A08 | 52900 | 342184 | FMN1      | 0.0187 | 1.0440 |
| 51017 | A03 | 56730 | 342898 | SYCN      | 0.0187 | 1.0440 |
| 11071 | H06 | 2521  | 10059  | DNM1L     | 0.0187 | 1.0441 |
| 51029 | H11 | 55690 | 55048  | VPS37C    | 0.0188 | 1.0441 |
| 31015 | F03 | 12774 | 8351   | HIST1H3D  | 0.0188 | 1.0442 |
| 31044 | F03 | 5109  | 3725   | JUN       | 0.0188 | 1.0442 |
| 31038 | D10 | 7560  | 7572   | ZNF24     | 0.0188 | 1.0442 |
| 11055 | A10 | 8460  | 285533 | RNF175    | 0.0188 | 1.0442 |

|       |     |       |        |           |        |        |
|-------|-----|-------|--------|-----------|--------|--------|
| 11085 | G08 | 3703  | 79228  | THOC6     | 0.0188 | 1.0442 |
| 11053 | H10 | 322   | 6175   | RPLP0     | 0.0188 | 1.0442 |
| 11015 | A12 | 5388  | 26521  | TIMM8B    | 0.0188 | 1.0443 |
| 11049 | B05 | 4322  | 79650  | C16orf57  | 0.0188 | 1.0443 |
| 11083 | E08 | 10083 | 9841   | ZBTB24    | 0.0188 | 1.0443 |
| 11014 | F10 | 4488  | 9188   | DDX21     | 0.0188 | 1.0443 |
| 11063 | D11 | 9990  | 80007  | C10orf88  | 0.0188 | 1.0443 |
| 11046 | E11 | 9430  | 339965 | CCDC158   | 0.0189 | 1.0444 |
| 11070 | D10 | 9641  | 55892  | MYNN      | 0.0189 | 1.0445 |
| 51025 | H11 | 56864 | 57505  | AARS2     | 0.0189 | 1.0445 |
| 31027 | B09 | 15064 | 55975  | KLHL7     | 0.0189 | 1.0445 |
| 11079 | E02 | 3675  | 8241   | RBM10     | 0.0189 | 1.0446 |
| 11087 | C04 | 3042  | 1140   | CHRN1     | 0.0190 | 1.0446 |
| 11022 | F01 | 7797  | 26284  | ERAL1     | 0.0190 | 1.0446 |
| 11055 | A05 | 3954  | 64782  | AEN       | 0.0190 | 1.0447 |
| 11017 | H09 | 7845  | 57085  | AGTRAP    | 0.0190 | 1.0447 |
| 11020 | G10 | 3608  | 1534   | CYB561    | 0.0190 | 1.0447 |
| 11065 | B12 | 2970  | 51093  | C1orf66   | 0.0190 | 1.0448 |
| 51032 | B06 | 55973 | 85235  | HIST1H2AH | 0.0190 | 1.0448 |
| 31023 | E03 | 13381 | 158399 | ZNF483    | 0.0190 | 1.0448 |
| 51034 | A03 | 54181 | 282618 | IL29      | 0.0191 | 1.0449 |
| 11053 | G02 | 9282  | 83733  | SLC25A18  | 0.0191 | 1.0449 |
| 31034 | A09 | 14984 | 8553   | BHLHE40   | 0.0191 | 1.0449 |
| 11077 | H07 | 2494  | 79651  | RHBDF2    | 0.0191 | 1.0449 |
| 11008 | H06 | 242   | 11274  | USP18     | 0.0191 | 1.0449 |
| 51026 | F07 | 53227 | 1375   | CPT1B     | 0.0191 | 1.0449 |
| 11013 | B09 | 4250  | 5725   | PTBP1     | 0.0191 | 1.0450 |
| 51017 | C04 | 56733 | 140880 | CST11     | 0.0191 | 1.0450 |
| 51028 | D06 | 55640 | 55240  | STEAP3    | 0.0191 | 1.0450 |
| 11001 | B02 | 415   | 541471 | LOC541471 | 0.0191 | 1.0450 |
| 31045 | H08 | 3587  | 595    | CCND1     | 0.0191 | 1.0450 |
| 11009 | B11 | 6984  | 55486  | PARL      | 0.0191 | 1.0451 |
| 51018 | F07 | 56558 | 3117   | HLA-DQA1  | 0.0192 | 1.0451 |
| 31041 | C06 | 7789  | 4478   | MSN       | 0.0192 | 1.0451 |
| 11064 | C10 | 9385  | 164656 | TMPRSS6   | 0.0192 | 1.0452 |
| 11086 | B07 | 7783  | 91107  | TRIM47    | 0.0192 | 1.0452 |
| 31020 | C05 | 12961 | 26270  | FBXO6     | 0.0192 | 1.0452 |
| 31026 | B12 | 13994 | 54900  | LAX1      | 0.0192 | 1.0453 |
| 11064 | G08 | 2454  | 10278  | EFS       | 0.0193 | 1.0453 |
| 51017 | A04 | 56154 | 148413 | LOC148413 | 0.0193 | 1.0453 |
| 11041 | B11 | 4523  | 9768   | KIAA0101  | 0.0193 | 1.0454 |
| 11012 | A01 | 198   | 27304  | MOCS3     | 0.0193 | 1.0454 |
| 11043 | A12 | 4318  | 51192  | CKLF      | 0.0193 | 1.0455 |
| 11077 | B03 | 4468  | 862    | RUNX1T1   | 0.0194 | 1.0456 |

|       |     |       |        |           |        |        |
|-------|-----|-------|--------|-----------|--------|--------|
| 11056 | C11 | 8168  | 9444   | QKI       | 0.0194 | 1.0456 |
| 11082 | C12 | 2673  | 2173   | FABP7     | 0.0194 | 1.0457 |
| 51012 | F04 | 52729 | 131578 | LRRC15    | 0.0194 | 1.0458 |
| 11068 | C01 | 8709  | 23047  | PDS5B     | 0.0194 | 1.0458 |
| 31041 | C02 | 6799  | 23559  | WBP1      | 0.0195 | 1.0459 |
| 31003 | B09 | 10728 | 11127  | KIF3A     | 0.0195 | 1.0459 |
| 51003 | C10 | 53127 | 5790   | PTPRCAP   | 0.0195 | 1.0459 |
| 11055 | F01 | 3934  | 54148  | MRPL39    | 0.0195 | 1.0459 |
| 51004 | E06 | 53886 | 166    | AES       | 0.0195 | 1.0459 |
| 11089 | G02 | 681   | 22901  | ARSG      | 0.0195 | 1.0459 |
| 31040 | D06 | 9585  | 7124   | TNF       | 0.0195 | 1.0459 |
| 11047 | B01 | 2488  | 51715  | RAB23     | 0.0195 | 1.0459 |
| 11049 | C02 | 1961  | 123970 | C16orf78  | 0.0195 | 1.0460 |
| 51013 | C11 | 53467 | 26156  | RSL1D1    | 0.0195 | 1.0460 |
| 51013 | H06 | 53518 | 9722   | NOS1AP    | 0.0195 | 1.0460 |
| 31014 | E01 | 12398 | 158763 | ARHGAP36  | 0.0196 | 1.0461 |
| 11056 | G11 | 2767  | 2582   | GALE      | 0.0196 | 1.0461 |
| 51015 | D11 | 52954 | 376132 | LRRC10    | 0.0196 | 1.0461 |
| 31015 | A05 | 12646 | 94274  | PPP1R14A  | 0.0196 | 1.0461 |
| 11050 | B11 | 1269  | 10966  | RAB40B    | 0.0196 | 1.0461 |
| 11029 | F12 | 3252  | 85359  | DGCR6L    | 0.0196 | 1.0461 |
| 11039 | F06 | 8061  | 247    | ALOX15B   | 0.0196 | 1.0461 |
| 51021 | F01 | 55830 | 8876   | VNN1      | 0.0196 | 1.0462 |
| 11061 | D05 | 9568  | 55738  | ARFGAP1   | 0.0197 | 1.0463 |
| 11016 | E12 | 5602  | 7381   | UQCRB     | 0.0197 | 1.0463 |
| 11016 | E09 | 5688  | 83943  | IMMP2L    | 0.0197 | 1.0463 |
| 31019 | F05 | 12864 | 91734  | IDI2      | 0.0197 | 1.0463 |
| 51002 | F12 | 54276 | 551    | AVP       | 0.0197 | 1.0463 |
| 11040 | E10 | 5016  | NA     | NA        | 0.0197 | 1.0464 |
| 11012 | G09 | 6942  | 991    | CDC20     | 0.0197 | 1.0464 |
| 31039 | H11 | 3423  | 6904   | TBCD      | 0.0197 | 1.0464 |
| 31014 | B04 | 11887 | 91875  | TTC5      | 0.0197 | 1.0464 |
| 11081 | H08 | 7596  | 2788   | GNG7      | 0.0197 | 1.0465 |
| 11087 | G03 | 1271  | 130399 | ACVR1C    | 0.0197 | 1.0465 |
| 31019 | A12 | 13128 | 51018  | RRP15     | 0.0197 | 1.0465 |
| 31015 | F05 | 12826 | 152756 | C4orf39   | 0.0198 | 1.0465 |
| 51004 | B01 | 54944 | 140711 | C20orf118 | 0.0198 | 1.0466 |
| 11043 | F11 | 6418  | 7432   | VIP       | 0.0198 | 1.0467 |
| 11073 | F11 | 869   | 116173 | CMTM5     | 0.0198 | 1.0467 |
| 11071 | F02 | 6796  | 84916  | CIRH1A    | 0.0198 | 1.0467 |
| 11022 | A01 | 7786  | 4351   | MPI       | 0.0199 | 1.0468 |
| 51030 | F11 | 53313 | 84792  | C7orf70   | 0.0199 | 1.0468 |
| 51027 | D06 | 55469 | 338692 | ANKRD13D  | 0.0199 | 1.0468 |
| 31040 | B02 | 1946  | 340351 | AGBL3     | 0.0199 | 1.0469 |



|       |     |       |        |          |        |        |
|-------|-----|-------|--------|----------|--------|--------|
| 11050 | F12 | 4652  | 2631   | GBAS     | 0.0199 | 1.0469 |
| 11061 | C10 | 5822  | 29915  | HCFC2    | 0.0199 | 1.0469 |
| 11022 | F05 | 7602  | 54899  | PXK      | 0.0199 | 1.0469 |
| 11022 | H06 | 4036  | 57504  | MTA3     | 0.0199 | 1.0470 |
| 31013 | F03 | 12280 | 23308  | ICOSLG   | 0.0200 | 1.0470 |
| 11068 | E05 | 2997  | 5709   | PSMD3    | 0.0200 | 1.0470 |
| 11055 | F10 | 3641  | 51451  | LCMT1    | 0.0200 | 1.0470 |
| 31021 | B08 | 13298 | 55036  | CCDC40   | 0.0200 | 1.0471 |
| 31005 | G01 | 11129 | 51491  | NOP16    | 0.0200 | 1.0471 |
| 11047 | C09 | 4639  | 51538  | ZCCHC17  | 0.0200 | 1.0471 |
| 51024 | B11 | 56290 | 9732   | DOCK4    | 0.0200 | 1.0472 |
| 31006 | G05 | 10893 | 112714 | TUBA3E   | 0.0200 | 1.0472 |
| 11037 | E08 | 4000  | 23603  | CORO1C   | 0.0200 | 1.0472 |
| 11076 | A02 | 5121  | 5228   | PGF      | 0.0200 | 1.0472 |
| 51023 | E01 | 56690 | 53616  | ADAM22   | 0.0201 | 1.0472 |
| 11081 | A03 | 1130  | 9087   | TMSB4Y   | 0.0201 | 1.0473 |
| 11069 | A05 | 6827  | 80198  | MUS81    | 0.0201 | 1.0473 |
| 51027 | F06 | 55515 | 442117 | GALNTL6  | 0.0201 | 1.0473 |
| 11067 | D03 | 2507  | 5034   | P4HB     | 0.0201 | 1.0473 |
| 51023 | G02 | 55882 | 89     | ACTN3    | 0.0201 | 1.0473 |
| 51005 | C11 | 53759 | 3761   | KCNJ4    | 0.0201 | 1.0474 |
| 11072 | E09 | 1906  | 169792 | GLIS3    | 0.0201 | 1.0474 |
| 11025 | D01 | 2104  | 56159  | TEX11    | 0.0201 | 1.0475 |
| 31044 | D03 | 4821  | 6320   | CLEC11A  | 0.0202 | 1.0475 |
| 11016 | E06 | 5522  | 55847  | CISD1    | 0.0202 | 1.0475 |
| 11007 | E10 | 6133  | 3300   | DNAJB2   | 0.0202 | 1.0475 |
| 11065 | G11 | 1608  | 79858  | NEK11    | 0.0202 | 1.0475 |
| 11024 | B10 | 4126  | 6772   | STAT1    | 0.0202 | 1.0476 |
| 11071 | D09 | 870   | 23769  | FLRT1    | 0.0202 | 1.0476 |
| 31038 | G10 | 7634  | 1453   | CSNK1D   | 0.0202 | 1.0476 |
| 11050 | D05 | 1134  | 51655  | RASD1    | 0.0202 | 1.0476 |
| 51003 | D10 | 56504 | 84536  | C21orf67 | 0.0202 | 1.0477 |
| 11018 | F10 | 7623  | 11126  | CD160    | 0.0202 | 1.0477 |
| 11071 | E12 | 3375  | 50853  | VILL     | 0.0202 | 1.0477 |
| 31018 | A12 | 12960 | 8605   | PLA2G4C  | 0.0202 | 1.0477 |
| 11068 | H11 | 9809  | 9356   | SLC22A6  | 0.0203 | 1.0478 |
| 31033 | H03 | 14717 | 167153 | PAPD4    | 0.0203 | 1.0478 |
| 11010 | G07 | 5531  | 1361   | CPB2     | 0.0203 | 1.0478 |
| 11079 | G06 | 5999  | 5098   | PCDHGC3  | 0.0203 | 1.0478 |
| 11002 | A05 | 8586  | 883    | CCBL1    | 0.0203 | 1.0478 |
| 51002 | D11 | 52920 | 9516   | LITAF    | 0.0204 | 1.0480 |
| 31023 | F10 | 13450 | 79058  | ASPSCR1  | 0.0204 | 1.0481 |
| 51032 | C11 | 55566 | 149643 | C1orf227 | 0.0204 | 1.0481 |
| 31007 | C12 | 11699 | 283638 | KIAA0284 | 0.0204 | 1.0481 |

|       |     |       |        |          |        |        |
|-------|-----|-------|--------|----------|--------|--------|
| 11049 | F04 | 3049  | 3552   | IL1A     | 0.0204 | 1.0482 |
| 11062 | E05 | 9563  | 79733  | E2F8     | 0.0205 | 1.0482 |
| 11051 | G01 | 4793  | 51295  | ECSIT    | 0.0205 | 1.0482 |
| 31009 | B05 | 11740 | 5866   | RAB3IL1  | 0.0205 | 1.0482 |
| 31040 | C05 | 9321  | 139212 | CXorf41  | 0.0205 | 1.0482 |
| 11007 | B07 | 9700  | 9649   | RALGPS1  | 0.0205 | 1.0482 |
| 31001 | H06 | 10365 | 116138 | KLHDC3   | 0.0205 | 1.0483 |
| 51032 | G08 | 55402 | 51065  | RPS27L   | 0.0205 | 1.0483 |
| 31026 | D12 | 13892 | 4142   | MAS1     | 0.0205 | 1.0483 |
| 11024 | A01 | 3145  | 10432  | RBM14    | 0.0205 | 1.0484 |
| 11071 | C07 | 8684  | 259232 | NALCN    | 0.0205 | 1.0484 |
| 11009 | E04 | 517   | 90952  | ESAM     | 0.0205 | 1.0484 |
| 31001 | B06 | 10759 | 91319  | DERL3    | 0.0206 | 1.0485 |
| 11022 | D10 | 7379  | 64425  | POLR1E   | 0.0206 | 1.0485 |
| 11046 | C06 | 9845  | 256957 | C17orf66 | 0.0206 | 1.0485 |
| 11045 | F09 | 2718  | 7076   | TIMP1    | 0.0206 | 1.0485 |
| 31023 | D12 | 13627 | 51744  | CD244    | 0.0206 | 1.0485 |
| 31029 | A12 | 14437 | 222236 | NAPEPLD  | 0.0206 | 1.0485 |
| 11026 | H02 | 1164  | 6863   | TAC1     | 0.0206 | 1.0485 |
| 11003 | A12 | 9878  | 4045   | LSAMP    | 0.0206 | 1.0485 |
| 11030 | F01 | 6626  | 55909  | BIN3     | 0.0206 | 1.0486 |
| 11026 | D03 | 2783  | 18     | ABAT     | 0.0206 | 1.0486 |
| 51034 | F12 | 53722 | 2798   | GNRHR    | 0.0206 | 1.0486 |
| 31034 | D01 | 14907 | 10345  | TRDN     | 0.0206 | 1.0486 |
| 31038 | D03 | 14722 | 7707   | ZNF148   | 0.0206 | 1.0486 |
| 11030 | D06 | 9658  | 245812 | CNPY4    | 0.0206 | 1.0487 |
| 31044 | A09 | 2259  | 441058 | MGC39584 | 0.0207 | 1.0487 |
| 11074 | B07 | 4839  | 84313  | VPS25    | 0.0207 | 1.0487 |
| 11009 | E03 | 46    | 9861   | PSMD6    | 0.0207 | 1.0487 |
| 11073 | C01 | 8884  | 10608  | MXD4     | 0.0207 | 1.0488 |
| 11059 | B03 | 9537  | 84002  | B3GNT5   | 0.0207 | 1.0489 |
| 11015 | H02 | 6513  | 3151   | HMG2     | 0.0207 | 1.0489 |
| 11044 | D09 | 4616  | 7329   | UBE2I    | 0.0207 | 1.0489 |
| 11013 | H10 | 6541  | 51     | ACOX1    | 0.0207 | 1.0489 |
| 11073 | H07 | 4315  | 80777  | CYB5B    | 0.0208 | 1.0490 |
| 51034 | D05 | 53857 | 196264 | MPZL3    | 0.0208 | 1.0490 |
| 11060 | F12 | 5305  | 6122   | RPL3     | 0.0208 | 1.0491 |
| 31037 | B09 | 14244 | 84901  | NFATC2IP | 0.0209 | 1.0492 |
| 51008 | D10 | 55177 | 2737   | GLI3     | 0.0209 | 1.0492 |
| 11006 | H07 | 4541  | 84287  | ZDHHC16  | 0.0209 | 1.0492 |
| 31026 | F05 | 13869 | 9032   | TM4SF5   | 0.0209 | 1.0492 |
| 11032 | D10 | 7761  | 9528   | TMEM59   | 0.0209 | 1.0492 |
| 11022 | H07 | 3344  | 79050  | NOC4L    | 0.0209 | 1.0492 |
| 51027 | H01 | 55315 | 54845  | ESRP1    | 0.0209 | 1.0493 |

|       |     |       |        |           |        |        |
|-------|-----|-------|--------|-----------|--------|--------|
| 11037 | C12 | 9914  | 57404  | CYP20A1   | 0.0209 | 1.0493 |
| 11077 | H11 | 2644  | 51603  | METTL13   | 0.0209 | 1.0493 |
| 31026 | E05 | 13827 | 1413   | CRYBA4    | 0.0209 | 1.0493 |
| 11077 | E12 | 1272  | 53919  | SLCO1C1   | 0.0209 | 1.0493 |
| 51029 | F11 | 55664 | 57159  | TRIM54    | 0.0209 | 1.0493 |
| 11055 | B04 | 7201  | 5892   | RAD51L3   | 0.0209 | 1.0493 |
| 11009 | G11 | 104   | 2150   | F2RL1     | 0.0209 | 1.0494 |
| 31003 | B01 | 10778 | 84892  | C3orf39   | 0.0209 | 1.0494 |
| 51021 | F07 | 55836 | 339010 | POTEB     | 0.0209 | 1.0494 |
| 11061 | C01 | 585   | 113655 | MFSD3     | 0.0210 | 1.0494 |
| 11002 | G04 | 5183  | 200014 | CC2D1B    | 0.0210 | 1.0495 |
| 11079 | C12 | 6064  | 2735   | GLI1      | 0.0210 | 1.0495 |
| 31003 | B04 | 10581 | 83479  | DDX59     | 0.0210 | 1.0495 |
| 51030 | A07 | 55670 | 10345  | TRDN      | 0.0210 | 1.0495 |
| 11063 | A07 | 9503  | 92949  | ADAMTSL1  | 0.0210 | 1.0496 |
| 51006 | F11 | 54687 | 374986 | FAM73A    | 0.0210 | 1.0496 |
| 11073 | D10 | 2128  | 56648  | EIF5A2    | 0.0210 | 1.0496 |
| 11052 | C03 | 1556  | 168537 | GIMAP7    | 0.0211 | 1.0497 |
| 11084 | A05 | 2642  | 326624 | RAB37     | 0.0211 | 1.0497 |
| 11032 | E07 | 9110  | 55339  | WDR33     | 0.0211 | 1.0497 |
| 11028 | A05 | 89    | 55974  | RAG1AP1   | 0.0211 | 1.0497 |
| 11065 | G07 | 9969  | 2534   | FYN       | 0.0211 | 1.0498 |
| 11030 | A04 | 7711  | 23429  | RYBP      | 0.0211 | 1.0498 |
| 51030 | E09 | 56941 | 643236 | TMEM72    | 0.0211 | 1.0498 |
| 11017 | F05 | 8008  | 94103  | ORMDL3    | 0.0211 | 1.0499 |
| 31040 | E04 | 8771  | 64793  | CCDC21    | 0.0212 | 1.0500 |
| 31043 | E08 | 7720  | 30846  | EHD2      | 0.0212 | 1.0500 |
| 51002 | F02 | 52775 | 154386 | C6orf195  | 0.0212 | 1.0501 |
| 31005 | E01 | 11035 | 753    | C18orf1   | 0.0213 | 1.0502 |
| 31006 | D04 | 11150 | 7941   | PLA2G7    | 0.0213 | 1.0502 |
| 51006 | G07 | 55409 | 81608  | FIP1L1    | 0.0213 | 1.0502 |
| 51016 | A10 | 56756 | 340017 | LOC340017 | 0.0213 | 1.0502 |
| 51006 | C01 | 53634 | 51289  | RXFP3     | 0.0213 | 1.0502 |
| 11075 | A01 | 2266  | 63948  | DMRTB1    | 0.0213 | 1.0503 |
| 11059 | G10 | 5672  | 419    | ART3      | 0.0213 | 1.0503 |
| 31005 | E12 | 10823 | 84612  | PAR6B     | 0.0213 | 1.0503 |
| 31038 | C04 | 14503 | 653519 | GPR89A    | 0.0213 | 1.0504 |
| 11016 | A11 | 7505  | 6281   | S100A10   | 0.0213 | 1.0504 |
| 11049 | D06 | 4729  | 3732   | CD82      | 0.0214 | 1.0505 |
| 11063 | F09 | 830   | 9015   | TAF1A     | 0.0214 | 1.0505 |
| 51025 | A01 | 53277 | 7249   | TSC2      | 0.0214 | 1.0505 |
| 11029 | G01 | 3531  | 23443  | SLC35A3   | 0.0214 | 1.0506 |
| 51022 | B01 | 55920 | 7569   | ZNF182    | 0.0215 | 1.0507 |
| 31015 | G09 | 12691 | 79850  | FAM57A    | 0.0215 | 1.0507 |

|       |     |       |        |           |        |        |
|-------|-----|-------|--------|-----------|--------|--------|
| 11021 | H06 | 4675  | 9791   | PTDSS1    | 0.0215 | 1.0507 |
| 51003 | B10 | 54614 | 390443 | RNASE9    | 0.0215 | 1.0508 |
| 11022 | B05 | 7538  | 11103  | KRR1      | 0.0215 | 1.0508 |
| 11074 | D09 | 5601  | 6447   | SCG5      | 0.0215 | 1.0509 |
| 51016 | B01 | 54524 | 54145  | H2BFS     | 0.0215 | 1.0509 |
| 51029 | E06 | 56117 | 130367 | SGPP2     | 0.0216 | 1.0509 |
| 31015 | B11 | 12813 | 28299  | IGKV1-5   | 0.0216 | 1.0509 |
| 51030 | D03 | 55450 | 22977  | AKR7A3    | 0.0216 | 1.0509 |
| 51017 | B03 | 56746 | 284688 | LOC284688 | 0.0216 | 1.0510 |
| 11047 | E06 | 4107  | 54512  | EXOSC4    | 0.0216 | 1.0510 |
| 11024 | D07 | 4743  | 55249  | YY1AP1    | 0.0216 | 1.0510 |
| 11035 | D07 | 3414  | 2584   | GALK1     | 0.0216 | 1.0511 |
| 51026 | D08 | 56485 | 58513  | EPS15L1   | 0.0216 | 1.0511 |
| 11064 | B12 | 7589  | 64320  | RNF25     | 0.0216 | 1.0511 |
| 11051 | A11 | 6575  | 57222  | ERGIC1    | 0.0217 | 1.0512 |
| 51033 | G10 | 53528 | 5303   | PIN4      | 0.0217 | 1.0512 |
| 31012 | F01 | 12175 | 84068  | SLC10A7   | 0.0217 | 1.0512 |
| 11059 | G01 | 6494  | 3294   | HSD17B2   | 0.0217 | 1.0512 |
| 11066 | G06 | 9858  | 29999  | FSCN3     | 0.0217 | 1.0512 |
| 11002 | G06 | 5603  | 7039   | TGFA      | 0.0217 | 1.0514 |
| 31044 | C02 | 7991  | 80303  | EFHD1     | 0.0218 | 1.0514 |
| 11045 | G03 | 864   | 116211 | TM4SF19   | 0.0218 | 1.0514 |
| 11055 | D09 | 9126  | 55823  | VPS11     | 0.0218 | 1.0514 |
| 51008 | F02 | 53864 | 57176  | VAR52     | 0.0218 | 1.0514 |
| 31026 | C08 | 13880 | 687    | KLF9      | 0.0218 | 1.0514 |
| 11022 | D12 | 7181  | 55178  | RNMTL1    | 0.0218 | 1.0514 |
| 51010 | B05 | 53011 | 7096   | TLR1      | 0.0218 | 1.0515 |
| 11076 | C04 | 3808  | 9097   | USP14     | 0.0218 | 1.0515 |
| 31034 | A01 | 14906 | 112744 | IL17F     | 0.0218 | 1.0516 |
| 11039 | C08 | 2190  | 152687 | ZNF595    | 0.0219 | 1.0516 |
| 11018 | G09 | 7830  | 6324   | SCN1B     | 0.0219 | 1.0516 |
| 11066 | B04 | 10140 | 4664   | NAB1      | 0.0219 | 1.0516 |
| 11064 | E12 | 7134  | 11329  | STK38     | 0.0219 | 1.0516 |
| 11058 | A03 | 7058  | 5886   | RAD23A    | 0.0219 | 1.0517 |
| 51033 | H02 | 55534 | 729603 | LOC729603 | 0.0219 | 1.0517 |
| 31044 | A07 | 3704  | 79414  | LRFN3     | 0.0219 | 1.0518 |
| 11047 | F01 | 159   | 132160 | PPM1M     | 0.0219 | 1.0518 |
| 31039 | F08 | 1103  | 8226   | HDHD1     | 0.0220 | 1.0518 |
| 11045 | E02 | 171   | 64859  | OBFC2A    | 0.0220 | 1.0519 |
| 11048 | D03 | 8618  | 79802  | HHIPL2    | 0.0220 | 1.0519 |
| 11050 | E07 | 1862  | 25830  | SULT4A1   | 0.0220 | 1.0519 |
| 31039 | E01 | 3457  | 84273  | C4orf14   | 0.0220 | 1.0519 |
| 11048 | D11 | 709   | 115024 | NT5C3L    | 0.0220 | 1.0520 |
| 31039 | D10 | 369   | 710    | SERPING1  | 0.0220 | 1.0520 |

|       |     |       |        |           |        |        |
|-------|-----|-------|--------|-----------|--------|--------|
| 11059 | D05 | 4132  | 5576   | PRKAR2A   | 0.0220 | 1.0520 |
| 11014 | D12 | 980   | 9744   | ACAP1     | 0.0220 | 1.0520 |
| 11038 | F06 | 5257  | 3312   | HSPA8     | 0.0220 | 1.0520 |
| 11010 | C07 | 7434  | 27013  | C2orf24   | 0.0220 | 1.0520 |
| 51029 | C02 | 55273 | 131583 | FAM43A    | 0.0220 | 1.0521 |
| 31043 | F03 | 7754  | 308    | ANXA5     | 0.0221 | 1.0521 |
| 31008 | G05 | 11568 | 11068  | CYB561D2  | 0.0221 | 1.0522 |
| 11014 | B03 | 166   | 79595  | SAP130    | 0.0221 | 1.0522 |
| 31021 | F11 | 12947 | 416    | ARSF      | 0.0221 | 1.0522 |
| 11086 | F06 | 1296  | 26039  | SS18L1    | 0.0221 | 1.0523 |
| 11083 | C08 | 7877  | 63940  | GPSM3     | 0.0221 | 1.0523 |
| 11037 | B02 | 6077  | 7849   | PAX8      | 0.0222 | 1.0523 |
| 11087 | E05 | 133   | 5709   | PSMD3     | 0.0222 | 1.0523 |
| 31031 | D06 | 14527 | 394    | ARHGAP5   | 0.0222 | 1.0524 |
| 11065 | C03 | 1145  | 10391  | CORO2B    | 0.0222 | 1.0524 |
| 51030 | A05 | 53199 | 163404 | LPPR5     | 0.0222 | 1.0525 |
| 31014 | G05 | 12258 | 64129  | TINAGL1   | 0.0222 | 1.0525 |
| 11015 | C08 | 9027  | 590    | BCHE      | 0.0222 | 1.0525 |
| 11077 | E04 | 2453  | 9729   | KIAA0408  | 0.0222 | 1.0525 |
| 11050 | B07 | 627   | 115290 | FBXO17    | 0.0222 | 1.0526 |
| 11078 | B02 | 5889  | 10256  | CNKSR1    | 0.0223 | 1.0526 |
| 31034 | B03 | 14884 | NA     | NA        | 0.0223 | 1.0526 |
| 11019 | H11 | 7375  | 10100  | TSPAN2    | 0.0223 | 1.0526 |
| 11079 | F05 | 3985  | 9276   | COPB2     | 0.0223 | 1.0527 |
| 11072 | F07 | 9912  | 7097   | TLR2      | 0.0223 | 1.0527 |
| 11087 | B03 | 3010  | 246269 | LACE1     | 0.0223 | 1.0528 |
| 51003 | D02 | 52586 | 337960 | KRTAP13-3 | 0.0223 | 1.0528 |
| 11006 | C08 | 8357  | 121506 | ERP27     | 0.0223 | 1.0528 |
| 11085 | E01 | 3209  | 826    | CAPNS1    | 0.0224 | 1.0528 |
| 11086 | G08 | 2505  | 202915 | TMEM184A  | 0.0224 | 1.0528 |
| 11012 | D01 | 348   | 27242  | TNFRSF21  | 0.0224 | 1.0528 |
| 11071 | D06 | 9824  | 7148   | TNXB      | 0.0224 | 1.0529 |
| 31023 | G07 | 13424 | 10202  | DHRS2     | 0.0224 | 1.0529 |
| 31019 | E09 | 13259 | 29970  | SCHIP1    | 0.0224 | 1.0530 |
| 11084 | A10 | 4628  | 65997  | RASL11B   | 0.0224 | 1.0530 |
| 11047 | G05 | 2520  | 166793 | ZBTB49    | 0.0224 | 1.0530 |
| 51006 | A02 | 53694 | 55584  | CHRNA9    | 0.0224 | 1.0530 |
| 11021 | A11 | 5596  | 5685   | PSMA4     | 0.0225 | 1.0531 |
| 11076 | F06 | 4872  | 2139   | EYA2      | 0.0225 | 1.0531 |
| 11027 | C03 | 2918  | 79870  | BAALC     | 0.0225 | 1.0531 |
| 11063 | H09 | 4267  | 218    | ALDH3A1   | 0.0225 | 1.0532 |
| 11077 | C10 | 2147  | 151112 | ZSWIM2    | 0.0225 | 1.0532 |
| 31024 | A11 | 13439 | 2870   | GRK6      | 0.0226 | 1.0533 |
| 11083 | F11 | 678   | 11082  | ESM1      | 0.0226 | 1.0533 |

|       |     |       |        |           |        |        |
|-------|-----|-------|--------|-----------|--------|--------|
| 31010 | H10 | 11480 | 23446  | SLC44A1   | 0.0226 | 1.0533 |
| 31001 | G08 | 10367 | 11149  | BVES      | 0.0226 | 1.0534 |
| 51024 | B10 | 56298 | 8972   | MGAM      | 0.0226 | 1.0534 |
| 11057 | A07 | 9273  | 284359 | IZUMO1    | 0.0226 | 1.0534 |
| 51004 | H02 | 54619 | 130827 | TMEM182   | 0.0226 | 1.0534 |
| 11029 | C04 | 9965  | 1942   | EFNA1     | 0.0226 | 1.0534 |
| 11049 | B03 | 314   | 6189   | RPS3A     | 0.0226 | 1.0534 |
| 11010 | A04 | 5200  | 84991  | RBM17     | 0.0227 | 1.0536 |
| 11034 | G07 | 6281  | 3772   | KCNJ15    | 0.0227 | 1.0536 |
| 11038 | B07 | 6171  | 55971  | BAIAP2L1  | 0.0227 | 1.0536 |
| 51031 | C08 | 55266 | 283693 | LOC283693 | 0.0228 | 1.0538 |
| 51001 | B12 | 54927 | 400710 | FLJ26850  | 0.0228 | 1.0538 |
| 11059 | B09 | 1361  | 51298  | THEG      | 0.0228 | 1.0539 |
| 31038 | B03 | 14501 | 150383 | C22orf40  | 0.0228 | 1.0539 |
| 11009 | D10 | 5416  | 54973  | CPSF3L    | 0.0228 | 1.0539 |
| 11002 | H04 | 5466  | 9403   | SEP15     | 0.0228 | 1.0540 |
| 51009 | C04 | 53118 | 5707   | PSMD1     | 0.0228 | 1.0540 |
| 11047 | D08 | 999   | 9581   | PREPL     | 0.0229 | 1.0540 |
| 31006 | C01 | 10856 | 1903   | S1PR3     | 0.0229 | 1.0540 |
| 11077 | E08 | 2362  | 154313 | C6orf165  | 0.0229 | 1.0540 |
| 31038 | F03 | 14618 | 4660   | PPP1R12B  | 0.0229 | 1.0541 |
| 51026 | H05 | 55308 | 6877   | TAF5      | 0.0229 | 1.0541 |
| 11027 | H06 | 3544  | 5919   | RARRES2   | 0.0229 | 1.0541 |
| 31039 | B11 | 8987  | 4926   | NUMA1     | 0.0229 | 1.0541 |
| 11016 | C01 | 5546  | 9419   | CRIPT     | 0.0229 | 1.0542 |
| 11061 | C08 | 4902  | 10785  | WDR4      | 0.0229 | 1.0542 |
| 11006 | F09 | 5785  | 85015  | USP45     | 0.0229 | 1.0542 |
| 31003 | H02 | 10480 | 1408   | CRY2      | 0.0229 | 1.0542 |
| 51001 | H01 | 56654 | 84981  | C17orf91  | 0.0229 | 1.0542 |
| 11027 | B02 | 3207  | 11161  | C14orf1   | 0.0229 | 1.0543 |
| 31003 | A02 | 10318 | 55975  | KLHL7     | 0.0230 | 1.0543 |
| 31041 | F05 | 6829  | 3597   | IL13RA1   | 0.0230 | 1.0543 |
| 31006 | A07 | 11321 | 2675   | GFRA2     | 0.0230 | 1.0543 |
| 11089 | C05 | 683   | 9325   | TRIP4     | 0.0230 | 1.0544 |
| 31011 | G05 | 12029 | 83605  | CCM2      | 0.0230 | 1.0544 |
| 51004 | B11 | 53919 | 10005  | ACOT8     | 0.0230 | 1.0544 |
| 31023 | D04 | 13443 | 51406  | NOL7      | 0.0230 | 1.0544 |
| 31002 | C11 | 10383 | 9993   | DGCR2     | 0.0230 | 1.0544 |
| 11046 | H07 | 2185  | 57097  | PARP11    | 0.0230 | 1.0544 |
| 51018 | H11 | 56120 | 91461  | PKDCC     | 0.0230 | 1.0545 |
| 11056 | A07 | 2654  | 2203   | FBP1      | 0.0230 | 1.0545 |
| 11011 | B05 | 220   | 56963  | RGMA      | 0.0230 | 1.0545 |
| 31036 | B06 | 11294 | 5949   | RBP3      | 0.0230 | 1.0545 |
| 11053 | C03 | 1237  | 164684 | WBP2NL    | 0.0231 | 1.0546 |

|       |     |       |        |           |        |        |
|-------|-----|-------|--------|-----------|--------|--------|
| 11088 | H01 | 9672  | 140706 | C20orf160 | 0.0231 | 1.0547 |
| 11002 | B05 | 923   | 6990   | DYNLT3    | 0.0232 | 1.0548 |
| 11040 | D09 | 8668  | 4336   | MOBP      | 0.0232 | 1.0548 |
| 31021 | E10 | 13155 | 162655 | ZNF519    | 0.0232 | 1.0548 |
| 11039 | C05 | 5306  | 23504  | RIMBP2    | 0.0232 | 1.0549 |
| 11002 | D09 | 5608  | 51023  | MRPS18C   | 0.0232 | 1.0549 |
| 31009 | H02 | 11340 | 10002  | NR2E3     | 0.0232 | 1.0549 |
| 11081 | G03 | 7287  | 440700 | LOC440700 | 0.0232 | 1.0550 |
| 11015 | E01 | 9127  | 9910   | RABGAP1L  | 0.0232 | 1.0550 |
| 11022 | B01 | 7352  | 84881  | RPUSD4    | 0.0232 | 1.0550 |
| 11043 | D05 | 5458  | 858    | CAV2      | 0.0233 | 1.0550 |
| 11087 | E02 | 6279  | 162979 | ZNF296    | 0.0233 | 1.0550 |
| 31004 | A04 | 10371 | 4811   | NID1      | 0.0233 | 1.0551 |
| 11060 | D02 | 8542  | 9399   | STOML1    | 0.0233 | 1.0551 |
| 11054 | E04 | 6683  | 51202  | DDX47     | 0.0233 | 1.0551 |
| 31042 | G03 | 5584  | 55033  | FKBP14    | 0.0233 | 1.0552 |
| 11052 | B12 | 8612  | 2161   | F12       | 0.0233 | 1.0552 |
| 11028 | A03 | 3254  | 5478   | PPIA      | 0.0233 | 1.0552 |
| 11038 | H03 | 5880  | 9060   | PAPSS2    | 0.0234 | 1.0552 |
| 51033 | B06 | 53913 | 337971 | KRTAP19-4 | 0.0234 | 1.0553 |
| 11088 | B04 | 5077  | 84305  | WIBG      | 0.0234 | 1.0553 |
| 11010 | H08 | 3659  | 10211  | FLOT1     | 0.0234 | 1.0553 |
| 11025 | B06 | 9747  | 23181  | DIP2A     | 0.0234 | 1.0553 |
| 11054 | D06 | 6493  | 55872  | PBK       | 0.0234 | 1.0553 |
| 11051 | H11 | 2822  | 51031  | GLOD4     | 0.0234 | 1.0554 |
| 11017 | G04 | 3382  | 11156  | PTP4A3    | 0.0234 | 1.0555 |
| 11052 | B11 | 2834  | 51170  | HSD17B11  | 0.0235 | 1.0556 |
| 31033 | F10 | 14845 | 1472   | CST4      | 0.0235 | 1.0556 |
| 11001 | E04 | 3085  | 10962  | MLLT11    | 0.0235 | 1.0557 |
| 11073 | H11 | 1136  | 4005   | LMO2      | 0.0235 | 1.0557 |
| 11036 | C01 | 6980  | 60626  | RIC8A     | 0.0235 | 1.0557 |
| 11051 | G03 | 5468  | 6819   | SULT1C2   | 0.0236 | 1.0558 |
| 51021 | C12 | 55845 | 55879  | GABRQ     | 0.0236 | 1.0558 |
| 11076 | D04 | 4058  | 79149  | ZSCAN5A   | 0.0236 | 1.0558 |
| 11056 | B03 | 195   | 51669  | TMEM66    | 0.0236 | 1.0559 |
| 11022 | G03 | 7994  | 23549  | DNPEP     | 0.0236 | 1.0559 |
| 31006 | E08 | 11192 | 440193 | CCDC88C   | 0.0236 | 1.0559 |
| 31003 | A08 | 10798 | 6498   | SKIL      | 0.0236 | 1.0559 |
| 11062 | B04 | 10051 | 5601   | MAPK9     | 0.0237 | 1.0560 |
| 11069 | F12 | 9366  | 58985  | IL22RA1   | 0.0237 | 1.0560 |
| 51003 | G02 | 54984 | 400932 | FLJ46257  | 0.0237 | 1.0560 |
| 51031 | F05 | 55589 | 10750  | GRAP      | 0.0237 | 1.0560 |
| 11015 | D05 | 8989  | 338382 | RAB7B     | 0.0237 | 1.0561 |
| 31029 | A05 | 14401 | 339184 | CCDC144NL | 0.0237 | 1.0562 |

|       |     |       |        |          |        |        |
|-------|-----|-------|--------|----------|--------|--------|
| 11048 | A11 | 5582  | 51118  | UTP11L   | 0.0237 | 1.0562 |
| 31044 | D09 | 567   | 90693  | CCDC126  | 0.0238 | 1.0562 |
| 51020 | D01 | 56021 | 284390 | ZNF763   | 0.0238 | 1.0562 |
| 11018 | C09 | 6876  | 1647   | GADD45A  | 0.0238 | 1.0563 |
| 31015 | G01 | 12414 | 11334  | TUSC2    | 0.0238 | 1.0563 |
| 11041 | C12 | 5595  | 4477   | MSMB     | 0.0238 | 1.0563 |
| 11059 | H07 | 4995  | 9214   | FAIM3    | 0.0238 | 1.0563 |
| 31039 | F01 | 6732  | 55726  | C12orf11 | 0.0238 | 1.0563 |
| 11006 | A08 | 2620  | 6615   | SNAI1    | 0.0238 | 1.0563 |
| 51021 | E02 | 56054 | 80059  | LRRTM4   | 0.0238 | 1.0563 |
| 51001 | B03 | 52681 | 79963  | ABCA11P  | 0.0238 | 1.0564 |
| 11068 | B04 | 2636  | 1041   | CDSN     | 0.0238 | 1.0564 |
| 11072 | C05 | 8705  | 64693  | CTAGE1   | 0.0238 | 1.0564 |
| 11047 | C05 | 6991  | 3068   | HDGF     | 0.0238 | 1.0564 |
| 31011 | E11 | 12298 | 64928  | MRPL14   | 0.0238 | 1.0564 |
| 31027 | C12 | 14317 | 7752   | ZNF200   | 0.0238 | 1.0564 |
| 31033 | C01 | 14756 | 23224  | SYNE2    | 0.0239 | 1.0565 |
| 31030 | E02 | 14467 | 51185  | CRBN     | 0.0239 | 1.0565 |
| 11042 | B02 | 860   | 55332  | DRAM1    | 0.0239 | 1.0566 |
| 11058 | D07 | 2025  | 11191  | PTENP1   | 0.0239 | 1.0566 |
| 11014 | A03 | 7281  | 1209   | CLPTM1   | 0.0239 | 1.0566 |
| 11027 | H03 | 2628  | 51187  | RSL24D1  | 0.0239 | 1.0566 |
| 11034 | E05 | 7989  | 29995  | LMCD1    | 0.0239 | 1.0566 |
| 11056 | B10 | 2994  | 112476 | PRRT2    | 0.0239 | 1.0567 |
| 11056 | E01 | 9822  | 57168  | ASPHD2   | 0.0239 | 1.0567 |
| 11044 | F06 | 221   | 201965 | RWDD4A   | 0.0239 | 1.0567 |
| 11051 | H07 | 2862  | 291    | SLC25A4  | 0.0239 | 1.0567 |
| 11004 | H05 | 331   | NA     | NA       | 0.0239 | 1.0567 |
| 31021 | D08 | 12921 | 719    | C3AR1    | 0.0239 | 1.0567 |
| 31006 | D06 | 11156 | 285555 | C4orf37  | 0.0240 | 1.0567 |
| 31018 | F05 | 13086 | 6039   | RNASE6   | 0.0240 | 1.0567 |
| 11050 | B02 | 499   | 11130  | ZWINT    | 0.0240 | 1.0567 |
| 11045 | B10 | 2743  | 10890  | RAB10    | 0.0240 | 1.0568 |
| 11008 | E02 | 9155  | 196441 | ZFC3H1   | 0.0240 | 1.0568 |
| 31029 | A09 | 14367 | 57019  | CIAPIN1  | 0.0240 | 1.0568 |
| 31039 | B07 | 3096  | 541578 | CXorf40B | 0.0240 | 1.0568 |
| 31025 | G06 | 13705 | 2050   | EPHB4    | 0.0241 | 1.0570 |
| 11042 | A05 | 8906  | 83641  | FAM107B  | 0.0241 | 1.0570 |
| 11066 | E02 | 6019  | 51343  | FZR1     | 0.0241 | 1.0570 |
| 31008 | G02 | 11435 | 253827 | MSRB3    | 0.0241 | 1.0571 |
| 51004 | E03 | 52637 | 23546  | SYNGR4   | 0.0241 | 1.0571 |
| 11079 | H08 | 10050 | 488    | ATP2A2   | 0.0241 | 1.0571 |
| 11061 | B04 | 471   | 1800   | DPEP1    | 0.0241 | 1.0571 |
| 11048 | E04 | 5396  | 10202  | DHRS2    | 0.0241 | 1.0571 |



|       |     |       |        |           |        |        |
|-------|-----|-------|--------|-----------|--------|--------|
| 11018 | E05 | 6749  | 29100  | TMEM208   | 0.0241 | 1.0571 |
| 31015 | C04 | 12628 | 25953  | PNKD      | 0.0242 | 1.0572 |
| 11003 | C12 | 9362  | 121268 | RHEBL1    | 0.0242 | 1.0572 |
| 31008 | A02 | 11472 | 7378   | UPP1      | 0.0242 | 1.0572 |
| 11020 | H11 | 7163  | 6835   | SURF2     | 0.0242 | 1.0573 |
| 51028 | A05 | 55323 | 8974   | P4HA2     | 0.0242 | 1.0573 |
| 11054 | A06 | 9310  | 140    | ADORA3    | 0.0242 | 1.0573 |
| 51001 | E02 | 52590 | 245909 | DEFB106A  | 0.0242 | 1.0573 |
| 11087 | A10 | 6664  | 1263   | PLK3      | 0.0242 | 1.0573 |
| 11007 | G07 | 6857  | 6888   | TALDO1    | 0.0242 | 1.0574 |
| 51030 | C08 | 56217 | 201299 | RDM1      | 0.0242 | 1.0574 |
| 11086 | H06 | 5933  | 10342  | TFG       | 0.0242 | 1.0574 |
| 31036 | G07 | 12257 | 5698   | PSMB9     | 0.0243 | 1.0575 |
| 11066 | H09 | 2269  | 148789 | B3GALNT2  | 0.0243 | 1.0575 |
| 31021 | A02 | 12860 | 419    | ART3      | 0.0243 | 1.0575 |
| 11051 | D08 | 826   | 140462 | ASB9      | 0.0243 | 1.0575 |
| 11076 | D07 | 4021  | 5471   | PPAT      | 0.0243 | 1.0576 |
| 11009 | D08 | 6533  | 26135  | SERBP1    | 0.0243 | 1.0577 |
| 11002 | C03 | 9804  | 2168   | FABP1     | 0.0244 | 1.0577 |
| 31008 | H03 | 11357 | 255762 | PDZD9     | 0.0244 | 1.0577 |
| 11082 | E03 | 6476  | 6613   | SUMO2     | 0.0244 | 1.0578 |
| 31033 | B11 | 14939 | 131920 | TMEM207   | 0.0244 | 1.0578 |
| 31031 | F05 | 14491 | 9260   | PDLIM7    | 0.0244 | 1.0578 |
| 31010 | E01 | 11452 | 374666 | WASH3P    | 0.0244 | 1.0578 |
| 11068 | F12 | 9261  | 152273 | FGD5      | 0.0244 | 1.0578 |
| 11067 | H01 | 8515  | 1807   | DPYS      | 0.0245 | 1.0579 |
| 11013 | H04 | 4     | 55722  | CEP72     | 0.0245 | 1.0580 |
| 31039 | A01 | 9902  | 79786  | KLHL36    | 0.0245 | 1.0580 |
| 11070 | B04 | 4409  | 6813   | STXBP2    | 0.0245 | 1.0580 |
| 11001 | F07 | 785   | 28974  | C19orf53  | 0.0245 | 1.0581 |
| 11008 | F05 | 288   | 51567  | TDP2      | 0.0245 | 1.0581 |
| 51033 | E03 | 56722 | 337963 | KRTAP23-1 | 0.0246 | 1.0582 |
| 11001 | C12 | 9673  | 55757  | UGGT2     | 0.0246 | 1.0582 |
| 11081 | D01 | 9049  | 6876   | TAGLN     | 0.0246 | 1.0582 |
| 11073 | E09 | 2410  | 1054   | CEBPG     | 0.0246 | 1.0583 |
| 11068 | H10 | 9716  | 9993   | DGCR2     | 0.0246 | 1.0583 |
| 11025 | B12 | 1563  | 5932   | RBBP8     | 0.0246 | 1.0583 |
| 51021 | A07 | 55846 | 7745   | ZNF192    | 0.0246 | 1.0583 |
| 11014 | D10 | 5279  | 10072  | DPP3      | 0.0246 | 1.0583 |
| 51031 | B10 | 55645 | 90427  | BMF       | 0.0246 | 1.0583 |
| 51022 | C09 | 53254 | 8454   | CUL1      | 0.0246 | 1.0583 |
| 11044 | F08 | 4511  | 58473  | PLEKHB1   | 0.0247 | 1.0584 |
| 11073 | A12 | 3129  | 7329   | UBE2I     | 0.0247 | 1.0585 |
| 51026 | C11 | 56853 | 147991 | DPY19L3   | 0.0247 | 1.0585 |

|       |     |       |        |           |        |        |
|-------|-----|-------|--------|-----------|--------|--------|
| 51032 | F01 | 56731 | 284827 | KRTAP13-4 | 0.0247 | 1.0585 |
| 11053 | C09 | 4241  | 84735  | CNDP1     | 0.0247 | 1.0586 |
| 11083 | B12 | 8411  | 50852  | TRAT1     | 0.0247 | 1.0586 |
| 11004 | C03 | 5859  | 113452 | TMEM54    | 0.0247 | 1.0586 |
| 11059 | D02 | 9968  | 5549   | PRELP     | 0.0248 | 1.0587 |
| 51005 | E10 | 54459 | 84282  | RNF135    | 0.0248 | 1.0587 |
| 11063 | D02 | 9293  | 29993  | PACSIN1   | 0.0248 | 1.0588 |
| 11007 | F02 | 672   | 5192   | PEX10     | 0.0248 | 1.0588 |
| 11016 | G05 | 6308  | 5266   | PI3       | 0.0248 | 1.0588 |
| 31027 | E06 | 13954 | 3742   | KCNA6     | 0.0248 | 1.0589 |
| 11021 | D12 | 5570  | 3612   | IMPA1     | 0.0249 | 1.0589 |
| 11002 | G02 | 5404  | 23585  | TMEM50A   | 0.0249 | 1.0589 |
| 11007 | F07 | 4967  | 1676   | DFFA      | 0.0249 | 1.0589 |
| 11012 | H09 | 7525  | 51493  | C22orf28  | 0.0249 | 1.0590 |
| 51011 | C12 | 54191 | 143879 | KBTBD3    | 0.0249 | 1.0590 |
| 11044 | H07 | 509   | 196410 | METTL7B   | 0.0249 | 1.0590 |
| 11003 | E05 | 5450  | 969    | CD69      | 0.0249 | 1.0590 |
| 11013 | C03 | 2278  | 1495   | CTNNA1    | 0.0249 | 1.0590 |
| 51011 | A07 | 52876 | 6929   | TCF3      | 0.0249 | 1.0590 |
| 11068 | F06 | 8032  | 54857  | GDPD2     | 0.0249 | 1.0590 |
| 11010 | D05 | 3564  | 4758   | NEU1      | 0.0249 | 1.0590 |
| 11004 | E05 | 5502  | 84289  | ING5      | 0.0249 | 1.0591 |
| 51012 | E01 | 53046 | 90161  | HS6ST2    | 0.0249 | 1.0591 |
| 11070 | E03 | 6879  | 55276  | PGM2      | 0.0249 | 1.0591 |
| 51031 | G06 | 53297 | 157657 | C8orf37   | 0.0250 | 1.0591 |
| 11074 | E08 | 1300  | 2944   | GSTM1     | 0.0250 | 1.0592 |
| 31044 | F01 | 4404  | 54958  | TMEM160   | 0.0250 | 1.0592 |
| 31026 | B04 | 13902 | 1427   | CRYGS     | 0.0250 | 1.0592 |
| 11019 | G04 | 7208  | 58488  | PCTP      | 0.0250 | 1.0592 |
| 11079 | A06 | 7870  | 3099   | HK2       | 0.0250 | 1.0592 |
| 51021 | F08 | 56157 | 582    | BBS1      | 0.0250 | 1.0592 |
| 11085 | D06 | 4898  | 51204  | TACO1     | 0.0250 | 1.0592 |
| 11054 | H07 | 127   | 7538   | ZFP36     | 0.0250 | 1.0594 |
| 11051 | H03 | 5340  | 84851  | TRIM52    | 0.0251 | 1.0594 |
| 51028 | H03 | 53329 | 338692 | ANKRD13D  | 0.0251 | 1.0594 |
| 31038 | A06 | 14438 | 84894  | LINGO1    | 0.0251 | 1.0595 |
| 31039 | D05 | 2717  | 8636   | SSNA1     | 0.0251 | 1.0595 |
| 11048 | E07 | 1332  | 79953  | TMEM90B   | 0.0251 | 1.0596 |
| 11056 | A09 | 577   | 677    | ZFP36L1   | 0.0251 | 1.0596 |
| 31025 | E10 | 14075 | 654231 | OCM       | 0.0251 | 1.0596 |
| 11046 | F11 | 2407  | 54927  | CHCHD3    | 0.0251 | 1.0596 |
| 11057 | A02 | 8492  | 90459  | ERI1      | 0.0252 | 1.0596 |
| 11054 | C03 | 2965  | 93210  | PGAP3     | 0.0252 | 1.0597 |
| 11006 | F03 | 8350  | 2204   | FCAR      | 0.0252 | 1.0597 |

|       |     |       |        |           |        |        |
|-------|-----|-------|--------|-----------|--------|--------|
| 51035 | C03 | 54364 | 4543   | MTNR1A    | 0.0252 | 1.0597 |
| 51033 | B02 | 56723 | 245908 | DEFB105A  | 0.0252 | 1.0597 |
| 31036 | F04 | 11263 | 114879 | OSBPL5    | 0.0252 | 1.0597 |
| 51032 | A04 | 56029 | 653316 | FAM153C   | 0.0252 | 1.0597 |
| 51024 | B03 | 55212 | 6491   | STIL      | 0.0252 | 1.0598 |
| 11028 | F12 | 8015  | 27295  | PDLIM3    | 0.0252 | 1.0598 |
| 31040 | E11 | 7061  | 27163  | NAAA      | 0.0252 | 1.0598 |
| 31042 | E11 | 5061  | 56961  | SHD       | 0.0253 | 1.0599 |
| 11060 | C05 | 889   | 64216  | TFB2M     | 0.0253 | 1.0599 |
| 11005 | F05 | 1620  | 219557 | C7orf62   | 0.0253 | 1.0599 |
| 11051 | G08 | 5715  | 92014  | MCART1    | 0.0253 | 1.0600 |
| 11041 | E10 | 555   | 29058  | C20orf30  | 0.0253 | 1.0600 |
| 31022 | E09 | 13417 | 4521   | NUDT1     | 0.0253 | 1.0600 |
| 11048 | E03 | 4817  | 4359   | MPZ       | 0.0253 | 1.0600 |
| 51026 | A08 | 53187 | 54760  | PCSK4     | 0.0253 | 1.0600 |
| 11037 | D04 | 4706  | 3190   | HNRNPK    | 0.0253 | 1.0601 |
| 31040 | G01 | 1758  | 6738   | TROVE2    | 0.0254 | 1.0601 |
| 11025 | B01 | 9202  | 2036   | EPB41L1   | 0.0254 | 1.0601 |
| 11088 | E09 | 2881  | 80017  | C14orf159 | 0.0254 | 1.0601 |
| 11048 | H02 | 3040  | 55599  | RNPC3     | 0.0254 | 1.0601 |
| 11003 | H07 | 8666  | 2157   | F8        | 0.0254 | 1.0602 |
| 11060 | E11 | 6652  | 91862  | MARVELD3  | 0.0254 | 1.0602 |
| 11016 | D07 | 7559  | 92259  | MRPS36    | 0.0254 | 1.0602 |
| 31038 | B11 | 324   | 5211   | PFKL      | 0.0254 | 1.0602 |
| 31022 | B01 | 13523 | 90011  | KIR3DX1   | 0.0254 | 1.0603 |
| 51032 | D07 | 55243 | 9789   | SPCS2     | 0.0254 | 1.0603 |
| 11060 | D03 | 3116  | 5589   | PRKCSH    | 0.0254 | 1.0603 |
| 11057 | C05 | 7255  | 94056  | SYAP1     | 0.0254 | 1.0603 |
| 51027 | F03 | 55702 | 999    | CDH1      | 0.0255 | 1.0604 |
| 11016 | E03 | 7628  | 388799 | C20orf107 | 0.0255 | 1.0604 |
| 51004 | H05 | 53556 | 134728 | IRAK1BP1  | 0.0255 | 1.0604 |
| 11002 | C06 | 10071 | 8336   | HIST1H2AM | 0.0255 | 1.0604 |
| 11059 | E05 | 9521  | 124783 | C17orf46  | 0.0255 | 1.0605 |
| 11051 | C05 | 6719  | 7549   | ZNF2      | 0.0255 | 1.0605 |
| 31002 | H07 | 10696 | 162427 | FAM134C   | 0.0255 | 1.0605 |
| 11002 | C09 | 9840  | 57494  | RIMKLB    | 0.0255 | 1.0605 |
| 51018 | F02 | 56751 | 3238   | HOXD12    | 0.0255 | 1.0606 |
| 51015 | A10 | 53133 | 340371 | NRBP2     | 0.0255 | 1.0606 |
| 11042 | E01 | 8447  | 729515 | C6orf35   | 0.0256 | 1.0606 |
| 11012 | D08 | 7372  | 6464   | SHC1      | 0.0256 | 1.0606 |
| 51006 | B04 | 54695 | 51557  | LGSN      | 0.0256 | 1.0606 |
| 51011 | C05 | 54125 | 92291  | CAPN13    | 0.0256 | 1.0606 |
| 51015 | C12 | 53776 | 2488   | FSHB      | 0.0256 | 1.0607 |
| 11060 | B11 | 4753  | 4144   | MAT2A     | 0.0256 | 1.0608 |

|       |     |       |        |            |        |        |
|-------|-----|-------|--------|------------|--------|--------|
| 51032 | H07 | 55453 | 652276 | LOC652276  | 0.0256 | 1.0608 |
| 31043 | C09 | 7919  | 11236  | RNF139     | 0.0256 | 1.0608 |
| 31013 | E08 | 12013 | 79980  | DSN1       | 0.0257 | 1.0609 |
| 31026 | D03 | 13813 | 1409   | CRYAA      | 0.0257 | 1.0609 |
| 11046 | D01 | 4587  | 51160  | VPS28      | 0.0257 | 1.0609 |
| 31005 | A07 | 10837 | 9949   | AMMECR1    | 0.0257 | 1.0609 |
| 51026 | A04 | 56484 | 57113  | TRPC7      | 0.0257 | 1.0609 |
| 31025 | E08 | 13797 | 2994   | GYPB       | 0.0258 | 1.0611 |
| 11018 | A04 | 7535  | 57456  | KIAA1143   | 0.0258 | 1.0611 |
| 11063 | G07 | 4595  | 7846   | TUBA1A     | 0.0258 | 1.0612 |
| 11010 | B03 | 5313  | 2068   | ERCC2      | 0.0258 | 1.0612 |
| 11049 | H03 | 4316  | 2709   | GJB5       | 0.0258 | 1.0612 |
| 11019 | B03 | 7547  | 664    | BNIP3      | 0.0258 | 1.0613 |
| 31034 | F03 | 14908 | 440184 | NCRNA00238 | 0.0258 | 1.0613 |
| 51006 | F12 | 54895 | 117153 | MIA2       | 0.0258 | 1.0613 |
| 31010 | D10 | 11556 | 4059   | BCAM       | 0.0258 | 1.0613 |
| 31041 | C11 | 5261  | 7873   | MANF       | 0.0259 | 1.0613 |
| 11077 | D11 | 3878  | 22954  | TRIM32     | 0.0259 | 1.0613 |
| 11062 | C03 | 4845  | 10298  | PAK4       | 0.0259 | 1.0614 |
| 51034 | D02 | 54354 | 653240 | KRTAP4-11  | 0.0259 | 1.0614 |
| 51024 | F07 | 56224 | 6091   | ROBO1      | 0.0259 | 1.0614 |
| 11007 | H02 | 6885  | 2783   | GNB2       | 0.0259 | 1.0614 |
| 31002 | C05 | 10761 | 221150 | SKA3       | 0.0259 | 1.0614 |
| 11044 | B05 | 947   | 10465  | PPIH       | 0.0259 | 1.0615 |
| 51011 | E10 | 53961 | 114134 | SLC2A13    | 0.0259 | 1.0615 |
| 51017 | E09 | 56705 | NA     | NA         | 0.0259 | 1.0615 |
| 11071 | B08 | 7600  | 30827  | CXXC1      | 0.0259 | 1.0615 |
| 11010 | C10 | 365   | 9775   | EIF4A3     | 0.0259 | 1.0615 |
| 51025 | F08 | 53218 | 57562  | KIAA1377   | 0.0259 | 1.0615 |
| 11075 | D04 | 4066  | 26353  | HSPB8      | 0.0259 | 1.0615 |
| 11016 | A10 | 6434  | 2252   | FGF7       | 0.0260 | 1.0616 |
| 31025 | B09 | 14056 | 728712 | SPANXA2    | 0.0260 | 1.0616 |
| 31005 | B06 | 10864 | 254359 | ZDHHC24    | 0.0260 | 1.0616 |
| 11083 | A03 | 2392  | 6155   | RPL27      | 0.0260 | 1.0617 |
| 31039 | D11 | 5103  | 10531  | PITRM1     | 0.0260 | 1.0617 |
| 51022 | G11 | 56302 | 101    | ADAM8      | 0.0260 | 1.0617 |
| 51008 | F10 | 56225 | 10497  | UNC13B     | 0.0260 | 1.0617 |
| 11013 | A02 | 2829  | 54946  | SLC41A3    | 0.0260 | 1.0617 |
| 11002 | D03 | 9314  | 4693   | NDP        | 0.0260 | 1.0618 |
| 11006 | G10 | 3966  | 4869   | NPM1       | 0.0260 | 1.0618 |
| 11051 | E02 | 4371  | 79947  | DHDDS      | 0.0261 | 1.0618 |
| 31023 | F04 | 13711 | 124995 | MRPL10     | 0.0261 | 1.0619 |
| 11020 | A04 | 6083  | 9592   | IER2       | 0.0261 | 1.0619 |
| 51003 | B02 | 52583 | 56300  | IL1F9      | 0.0261 | 1.0619 |

|       |     |       |        |            |        |        |
|-------|-----|-------|--------|------------|--------|--------|
| 11077 | G03 | 3903  | 4000   | LMNA       | 0.0261 | 1.0620 |
| 51008 | A05 | 54584 | 5506   | PPP1R3A    | 0.0262 | 1.0621 |
| 11053 | B04 | 8597  | 84561  | SLC12A8    | 0.0262 | 1.0622 |
| 11008 | A12 | 285   | 3660   | IRF2       | 0.0262 | 1.0622 |
| 11054 | E12 | 5551  | 26751  | SH3YL1     | 0.0263 | 1.0624 |
| 11043 | B10 | 5101  | 254896 | LOC254896  | 0.0263 | 1.0624 |
| 31004 | B04 | 10616 | 8502   | PKP4       | 0.0263 | 1.0625 |
| 11055 | H09 | 3837  | 9409   | PEX16      | 0.0263 | 1.0625 |
| 11072 | A12 | 19    | 4174   | MCM5       | 0.0263 | 1.0625 |
| 11056 | E04 | 4068  | 28951  | TRIB2      | 0.0263 | 1.0625 |
| 31038 | C09 | 7280  | 23562  | CLDN14     | 0.0263 | 1.0625 |
| 11059 | E11 | 8792  | 2319   | FLOT2      | 0.0264 | 1.0626 |
| 11016 | C12 | 6286  | 9506   | PAGE4      | 0.0264 | 1.0626 |
| 31016 | D03 | 12583 | 6187   | RPS2       | 0.0264 | 1.0626 |
| 51035 | B01 | 53736 | 6975   | TECTB      | 0.0264 | 1.0626 |
| 31021 | D03 | 13311 | 115201 | ATG4A      | 0.0264 | 1.0627 |
| 31040 | E12 | 6842  | 85395  | C21orf70   | 0.0264 | 1.0627 |
| 51013 | D09 | 53087 | 5018   | OXA1L      | 0.0264 | 1.0627 |
| 31010 | E04 | 11521 | 4327   | MMP19      | 0.0264 | 1.0627 |
| 11077 | D04 | 875   | 89970  | RSPRY1     | 0.0264 | 1.0627 |
| 51024 | D04 | 55187 | 6655   | SOS2       | 0.0264 | 1.0627 |
| 51009 | D08 | 53506 | 283383 | GPR133     | 0.0264 | 1.0628 |
| 11045 | A11 | 4217  | 80110  | ZNF614     | 0.0264 | 1.0628 |
| 31007 | A01 | 11153 | 1879   | EBF1       | 0.0264 | 1.0628 |
| 51011 | F05 | 53031 | 51702  | PADI3      | 0.0265 | 1.0628 |
| 11018 | F09 | 6710  | 50861  | STMN3      | 0.0265 | 1.0628 |
| 31026 | C04 | 13809 | 50616  | IL22       | 0.0265 | 1.0629 |
| 11080 | H03 | 1482  | 23     | ABCF1      | 0.0265 | 1.0630 |
| 11008 | G07 | 3410  | 84245  | MRI1       | 0.0265 | 1.0630 |
| 31008 | F06 | 11620 | 5683   | PSMA2      | 0.0266 | 1.0630 |
| 11016 | G01 | 7557  | 145957 | NRG4       | 0.0266 | 1.0631 |
| 11029 | E12 | 5769  | 1442   | CSH1       | 0.0266 | 1.0631 |
| 11044 | E08 | 2674  | 55207  | ARL8B      | 0.0266 | 1.0632 |
| 51003 | F04 | 56320 | 30848  | CTAG2      | 0.0266 | 1.0632 |
| 51004 | B07 | 53739 | 51032  | CELA2B     | 0.0266 | 1.0632 |
| 11006 | A02 | 7230  | 113277 | TMEM106A   | 0.0267 | 1.0633 |
| 11042 | D03 | 1680  | 1381   | CRABP1     | 0.0267 | 1.0633 |
| 11071 | H08 | 1129  | 10446  | LRRN2      | 0.0267 | 1.0633 |
| 11027 | E02 | 9530  | 5003   | SLC22A18AS | 0.0267 | 1.0633 |
| 31015 | F12 | 12724 | 6627   | SNRPA1     | 0.0267 | 1.0634 |
| 11068 | B12 | 2601  | 79802  | HHIPL2     | 0.0267 | 1.0635 |
| 31017 | D03 | 12590 | 9179   | AP4M1      | 0.0267 | 1.0635 |
| 11062 | H06 | 9812  | 57094  | CPA6       | 0.0268 | 1.0636 |
| 11039 | G11 | 1913  | 9886   | RHOBTB1    | 0.0268 | 1.0636 |

|       |     |       |        |            |        |        |
|-------|-----|-------|--------|------------|--------|--------|
| 11021 | A03 | 5204  | 3115   | HLA-DPB1   | 0.0268 | 1.0636 |
| 11067 | D07 | 9802  | 90     | ACVR1      | 0.0268 | 1.0636 |
| 51008 | C11 | 53595 | 1794   | DOCK2      | 0.0268 | 1.0636 |
| 51028 | G11 | 55459 | 136227 | EMID2      | 0.0268 | 1.0637 |
| 51027 | B11 | 53357 | 60494  | CCDC81     | 0.0268 | 1.0637 |
| 11061 | E02 | 3787  | 1453   | CSNK1D     | 0.0269 | 1.0639 |
| 31022 | C12 | 13425 | 5892   | RAD51L3    | 0.0269 | 1.0639 |
| 11056 | E07 | 4368  | 7703   | PCGF2      | 0.0269 | 1.0639 |
| 31030 | B10 | 14252 | 55901  | THSD1      | 0.0269 | 1.0639 |
| 11048 | D05 | 9535  | 140545 | RNF32      | 0.0269 | 1.0640 |
| 11016 | A03 | 8841  | 79089  | TMUB2      | 0.0269 | 1.0640 |
| 31017 | D06 | 12658 | 8602   | NOP14      | 0.0269 | 1.0640 |
| 51001 | D04 | 52656 | 11142  | PKIG       | 0.0269 | 1.0640 |
| 11041 | B06 | 8669  | 56986  | DTWD1      | 0.0269 | 1.0640 |
| 31027 | B04 | 13976 | 89778  | SERPINB11  | 0.0270 | 1.0641 |
| 51002 | D04 | 55972 | 8337   | HIST2H2AA3 | 0.0270 | 1.0641 |
| 11052 | H04 | 8905  | 351    | APP        | 0.0270 | 1.0641 |
| 11044 | H03 | 4472  | 29101  | SSU72      | 0.0270 | 1.0641 |
| 51022 | F09 | 56684 | 55697  | VAC14      | 0.0270 | 1.0642 |
| 11069 | B11 | 7247  | 6548   | SLC9A1     | 0.0270 | 1.0642 |
| 51013 | C02 | 52782 | 167127 | UGT3A2     | 0.0270 | 1.0642 |
| 11044 | H02 | 8545  | 129530 | LYG1       | 0.0270 | 1.0642 |
| 51009 | H03 | 53061 | 121601 | ANO4       | 0.0270 | 1.0642 |
| 31007 | E09 | 11618 | 10904  | BLCAP      | 0.0270 | 1.0642 |
| 31042 | A11 | 5338  | 253461 | ZBTB38     | 0.0270 | 1.0643 |
| 11007 | C10 | 6778  | 51035  | UBXN1      | 0.0271 | 1.0643 |
| 51021 | G04 | 56047 | 165057 | FLJ39061   | 0.0271 | 1.0643 |
| 11019 | F08 | 7350  | 115861 | NXNL1      | 0.0271 | 1.0643 |
| 51013 | G01 | 54913 | 79799  | UGT2A3     | 0.0271 | 1.0643 |
| 51003 | D03 | 54083 | 1419   | CRYGB      | 0.0271 | 1.0644 |
| 11050 | A04 | 6257  | 120224 | TMEM45B    | 0.0271 | 1.0644 |
| 51021 | E12 | 56158 | 6545   | SLC7A4     | 0.0271 | 1.0644 |
| 11044 | D07 | 8563  | 79582  | SPAG16     | 0.0271 | 1.0644 |
| 11012 | F10 | 6763  | 3437   | IFIT3      | 0.0271 | 1.0644 |
| 11083 | E12 | 8762  | 84939  | MUM1       | 0.0271 | 1.0645 |
| 11087 | C01 | 5271  | 7760   | ZNF213     | 0.0271 | 1.0645 |
| 51008 | E10 | 55194 | 7074   | TIAM1      | 0.0271 | 1.0645 |
| 11069 | B01 | 9364  | 85320  | ABCC11     | 0.0271 | 1.0645 |
| 51025 | B01 | 56887 | 63971  | KIF13A     | 0.0272 | 1.0645 |
| 51002 | A03 | 52720 | 85285  | KRTAP4-1   | 0.0272 | 1.0645 |
| 31042 | A10 | 6005  | 25849  | PARM1      | 0.0272 | 1.0645 |
| 11035 | H04 | 6405  | 2004   | ELK3       | 0.0272 | 1.0646 |
| 51024 | B02 | 54653 | 51455  | REV1       | 0.0272 | 1.0646 |
| 11019 | D09 | 6012  | 5691   | PSMB3      | 0.0272 | 1.0646 |

|       |     |       |           |              |        |        |
|-------|-----|-------|-----------|--------------|--------|--------|
| 11035 | B12 | 6690  | 6570      | SLC18A1      | 0.0272 | 1.0646 |
| 11048 | H01 | 2893  | 23558     | WBP2         | 0.0272 | 1.0646 |
| 31039 | A02 | 2058  | 51222     | ZNF219       | 0.0272 | 1.0647 |
| 51030 | D09 | 56444 | 167555    | FAM151B      | 0.0273 | 1.0648 |
| 51010 | F07 | 54144 | 221458    | KIF6         | 0.0273 | 1.0648 |
| 51021 | C05 | 56662 | 57465     | TBC1D24      | 0.0273 | 1.0649 |
| 31006 | D02 | 10950 | 170261    | ZCCHC12      | 0.0273 | 1.0649 |
| 11058 | A05 | 5979  | 5984      | RFC4         | 0.0273 | 1.0649 |
| 11082 | D12 | 2985  | 4807      | NHLH1        | 0.0273 | 1.0650 |
| 11056 | A12 | 3859  | 4191      | MDH2         | 0.0274 | 1.0650 |
| 11013 | H11 | 5849  | 22955     | SCMH1        | 0.0274 | 1.0650 |
| 51030 | A10 | 55257 | 8558      | CDK10        | 0.0274 | 1.0651 |
| 11006 | B11 | 5536  | 10136     | CELA3A       | 0.0274 | 1.0651 |
| 11065 | G06 | 9573  | 53339     | BTBD1        | 0.0274 | 1.0652 |
| 31030 | D03 | 14231 | 129831    | RBM45        | 0.0274 | 1.0652 |
| 11008 | E11 | 4017  | 11152     | WDR45        | 0.0275 | 1.0653 |
| 11077 | G05 | 1375  | 8277      | TKTL1        | 0.0275 | 1.0654 |
| 11014 | D02 | 8203  | 4140      | MARK3        | 0.0275 | 1.0654 |
| 11010 | G11 | 4249  | 10262     | SF3B4        | 0.0275 | 1.0654 |
| 31012 | H11 | 12052 | 100288778 | LOC100288778 | 0.0275 | 1.0654 |
| 11006 | C12 | 8529  | 284099    | C17orf78     | 0.0275 | 1.0654 |
| 51022 | B11 | 55875 | 56104     | PCDHGB1      | 0.0275 | 1.0655 |
| 11008 | F12 | 5941  | 6611      | SMS          | 0.0275 | 1.0655 |
| 51027 | E08 | 55340 | 406       | ARNTL        | 0.0276 | 1.0655 |
| 31017 | G08 | 12845 | 93986     | FOXP2        | 0.0276 | 1.0656 |
| 31005 | D06 | 11277 | 8611      | PPAP2A       | 0.0276 | 1.0656 |
| 51028 | G05 | 55503 | 1687      | DFNA5        | 0.0276 | 1.0657 |
| 11080 | F08 | 10144 | 8483      | CILP         | 0.0276 | 1.0657 |
| 11008 | C10 | 7237  | 2771      | GNAI2        | 0.0276 | 1.0657 |
| 51033 | H06 | 55075 | 284100    | LOC284100    | 0.0276 | 1.0657 |
| 51032 | E08 | 55519 | 805       | CALM2        | 0.0276 | 1.0657 |
| 51009 | E03 | 54260 | 81578     | COL21A1      | 0.0276 | 1.0657 |
| 51023 | H03 | 56264 | 151887    | CCDC80       | 0.0277 | 1.0658 |
| 11055 | F06 | 5630  | 26275     | HIBCH        | 0.0277 | 1.0658 |
| 11038 | G05 | 5835  | 10324     | KBTD10       | 0.0277 | 1.0659 |
| 11047 | H02 | 4693  | 5720      | PSME1        | 0.0277 | 1.0659 |
| 11004 | C08 | 5747  | 5553      | PRG2         | 0.0278 | 1.0660 |
| 11046 | B06 | 2413  | 4736      | RPL10A       | 0.0278 | 1.0661 |
| 31038 | F05 | 14332 | 26261     | FBXO24       | 0.0278 | 1.0661 |
| 11076 | H06 | 4400  | 26286     | ARFGAP3      | 0.0278 | 1.0661 |
| 51024 | F05 | 55164 | 1612      | DAPK1        | 0.0278 | 1.0661 |
| 51034 | G10 | 54186 | 79345     | OR51B2       | 0.0279 | 1.0662 |
| 51004 | A07 | 53945 | 162466    | PHOSPHO1     | 0.0279 | 1.0663 |
| 51033 | H05 | 53548 | 2644      | GCHFR        | 0.0279 | 1.0663 |

|       |     |       |        |           |        |        |
|-------|-----|-------|--------|-----------|--------|--------|
| 11068 | C07 | 2275  | 285172 | FAM126B   | 0.0279 | 1.0664 |
| 11086 | H09 | 6792  | 57410  | SCYL1     | 0.0279 | 1.0664 |
| 11066 | D05 | 1877  | 2556   | GABRA3    | 0.0279 | 1.0665 |
| 31012 | E06 | 12006 | 10750  | GRAP      | 0.0279 | 1.0665 |
| 31044 | F08 | 6198  | 5091   | PC        | 0.0280 | 1.0665 |
| 11005 | F09 | 646   | 56650  | CLDND1    | 0.0280 | 1.0666 |
| 11015 | F05 | 7620  | 58527  | C6orf115  | 0.0280 | 1.0666 |
| 11003 | E01 | 5287  | 6191   | RPS4X     | 0.0281 | 1.0667 |
| 11005 | G03 | 9895  | 57409  | MIF4GD    | 0.0281 | 1.0667 |
| 51022 | G03 | 55857 | 1261   | CNGA3     | 0.0281 | 1.0667 |
| 11005 | E04 | 902   | 2810   | SFN       | 0.0281 | 1.0667 |
| 11001 | C11 | 10216 | 153364 | MBLAC2    | 0.0281 | 1.0668 |
| 11053 | A09 | 1008  | 8851   | CDK5R1    | 0.0281 | 1.0668 |
| 31044 | F10 | 371   | 1072   | CFL1      | 0.0281 | 1.0668 |
| 11044 | G05 | 7148  | 28512  | NKIRAS1   | 0.0281 | 1.0668 |
| 11066 | H01 | 6603  | 60686  | C14orf93  | 0.0281 | 1.0669 |
| 11074 | C01 | 2257  | 131870 | NUDT16    | 0.0281 | 1.0669 |
| 11071 | G11 | 6561  | 63935  | PCIF1     | 0.0282 | 1.0670 |
| 31012 | D02 | 12358 | 1033   | CDKN3     | 0.0282 | 1.0670 |
| 51005 | B11 | 55441 | 149483 | CCDC17    | 0.0282 | 1.0670 |
| 11086 | D08 | 4645  | 409    | ARRB2     | 0.0282 | 1.0670 |
| 11008 | C07 | 5285  | 5013   | OTX1      | 0.0282 | 1.0670 |
| 11050 | B06 | 4193  | 874    | CBR3      | 0.0282 | 1.0671 |
| 51012 | C05 | 52740 | 84069  | PLEKHN1   | 0.0282 | 1.0671 |
| 51001 | E10 | 54962 | 219854 | TMEM218   | 0.0282 | 1.0671 |
| 11001 | F01 | 10187 | 196500 | C12orf53  | 0.0282 | 1.0671 |
| 11089 | A01 | 1118  | 64850  | AGXT2L1   | 0.0282 | 1.0672 |
| 11052 | E09 | 7386  | 65008  | MRPL1     | 0.0282 | 1.0672 |
| 11004 | B06 | 3060  | 51399  | TRAPPC4   | 0.0282 | 1.0672 |
| 11072 | E06 | 2426  | 10813  | UTP14A    | 0.0282 | 1.0672 |
| 11048 | H10 | 1709  | 84688  | C9orf24   | 0.0283 | 1.0672 |
| 51009 | F12 | 53598 | 56110  | PCDHGA5   | 0.0283 | 1.0673 |
| 31018 | A04 | 13201 | 83758  | RBP5      | 0.0283 | 1.0673 |
| 11042 | C02 | 9135  | 132949 | AASDH     | 0.0283 | 1.0673 |
| 11053 | F07 | 6137  | 5307   | PITX1     | 0.0283 | 1.0674 |
| 31009 | E06 | 11622 | 339047 | LOC339047 | 0.0283 | 1.0674 |
| 31021 | C08 | 13221 | 51458  | RHCG      | 0.0283 | 1.0674 |
| 11019 | F05 | 4022  | 1841   | DTYMK     | 0.0283 | 1.0674 |
| 11074 | F07 | 1898  | 28998  | MRPL13    | 0.0283 | 1.0674 |
| 11080 | B02 | 5053  | 10483  | SEC23B    | 0.0284 | 1.0675 |
| 11039 | H08 | 7288  | 55902  | ACSS2     | 0.0284 | 1.0675 |
| 11028 | G10 | 8740  | 5495   | PPM1B     | 0.0284 | 1.0675 |
| 11008 | F03 | 4877  | 25953  | PNKD      | 0.0284 | 1.0676 |
| 31008 | E02 | 11479 | 60559  | SPCS3     | 0.0284 | 1.0676 |



|       |     |       |        |           |        |        |
|-------|-----|-------|--------|-----------|--------|--------|
| 11016 | E10 | 7483  | 83460  | TMEM93    | 0.0284 | 1.0677 |
| 11016 | D09 | 7394  | 6282   | S100A11   | 0.0284 | 1.0677 |
| 11028 | C08 | 1198  | 8740   | TNFSF14   | 0.0284 | 1.0677 |
| 11073 | C10 | 1169  | 10284  | SAP18     | 0.0285 | 1.0677 |
| 11057 | C11 | 9341  | 373863 | DND1      | 0.0285 | 1.0678 |
| 51008 | B07 | 54150 | 11276  | SYNRG     | 0.0285 | 1.0678 |
| 11059 | H08 | 6869  | 89884  | LHX4      | 0.0285 | 1.0678 |
| 51031 | D01 | 53290 | 7019   | TFAM      | 0.0285 | 1.0678 |
| 11044 | A10 | 6944  | 112616 | CMTM7     | 0.0285 | 1.0678 |
| 51028 | F10 | 55667 | 348174 | CLEC18A   | 0.0285 | 1.0679 |
| 11009 | F05 | 6062  | 80895  | ILKAP     | 0.0285 | 1.0679 |
| 11047 | E01 | 2136  | 137994 | LETM2     | 0.0285 | 1.0679 |
| 11011 | F07 | 5968  | 84790  | TUBA1C    | 0.0285 | 1.0679 |
| 51028 | A02 | 56366 | 64781  | CERK      | 0.0286 | 1.0680 |
| 11037 | F05 | 6032  | 83667  | SESN2     | 0.0286 | 1.0680 |
| 11034 | C04 | 6540  | 57060  | PCBP4     | 0.0286 | 1.0681 |
| 51024 | B01 | 54999 | 54795  | TRPM4     | 0.0286 | 1.0681 |
| 11022 | C03 | 7539  | 427    | ASAHI     | 0.0286 | 1.0681 |
| 11067 | E09 | 8407  | 5530   | PPP3CA    | 0.0286 | 1.0681 |
| 11039 | A03 | 7151  | 26128  | KIAA1279  | 0.0286 | 1.0681 |
| 31042 | H06 | 6334  | 3108   | HLA-DMA   | 0.0286 | 1.0682 |
| 11015 | H07 | 9098  | 1716   | DGUOK     | 0.0286 | 1.0682 |
| 11057 | F05 | 2144  | 10690  | FUT9      | 0.0287 | 1.0682 |
| 51014 | D11 | 53022 | 8045   | RASSF7    | 0.0287 | 1.0682 |
| 11011 | H08 | 3562  | 9260   | PDLIM7    | 0.0287 | 1.0683 |
| 31007 | F11 | 11827 | 57119  | SPINLW1   | 0.0287 | 1.0683 |
| 31004 | C06 | 11048 | 56674  | TMEM9B    | 0.0288 | 1.0685 |
| 31039 | E04 | 8652  | 9465   | AKAP7     | 0.0288 | 1.0685 |
| 51025 | H08 | 56850 | 54477  | PLEKHA5   | 0.0288 | 1.0685 |
| 31002 | B03 | 10711 | 26272  | FBXO4     | 0.0288 | 1.0686 |
| 11016 | C04 | 7703  | 23187  | PHLDB1    | 0.0288 | 1.0687 |
| 51003 | H05 | 54967 | 389791 | LOC389791 | 0.0289 | 1.0687 |
| 11086 | C11 | 8166  | 51203  | NUSAP1    | 0.0289 | 1.0688 |
| 31030 | H07 | 14213 | 247    | ALOX15B   | 0.0289 | 1.0688 |
| 51008 | C10 | 55594 | 51585  | PCF11     | 0.0289 | 1.0689 |
| 11013 | A10 | 8216  | 54758  | KLHDC4    | 0.0289 | 1.0689 |
| 11050 | F02 | 1853  | 9457   | FHL5      | 0.0289 | 1.0689 |
| 11027 | B11 | 1184  | 55885  | LMO3      | 0.0289 | 1.0689 |
| 11026 | D10 | 2226  | 149685 | ADIG      | 0.0289 | 1.0689 |
| 11075 | E05 | 5997  | 23600  | AMACR     | 0.0289 | 1.0689 |
| 11078 | E11 | 2457  | 164    | APIG1     | 0.0290 | 1.0690 |
| 51021 | G09 | 55726 | 5910   | RAP1GDS1  | 0.0290 | 1.0690 |
| 31015 | G05 | 12765 | 117581 | TWIST2    | 0.0290 | 1.0690 |
| 11080 | H02 | 10102 | 9373   | PLAA      | 0.0290 | 1.0691 |

|       |     |       |        |           |        |        |
|-------|-----|-------|--------|-----------|--------|--------|
| 11088 | E07 | 1403  | 55349  | CHDH      | 0.0290 | 1.0691 |
| 51027 | C03 | 55683 | 8540   | AGPS      | 0.0290 | 1.0691 |
| 31037 | A01 | 12196 | 26052  | DNM3      | 0.0290 | 1.0691 |
| 11020 | A12 | 7097  | 9552   | SPAG7     | 0.0290 | 1.0692 |
| 11045 | D09 | 710   | 143187 | VTI1A     | 0.0291 | 1.0692 |
| 11024 | G03 | 10032 | 10024  | TROAP     | 0.0291 | 1.0692 |
| 11073 | A04 | 3762  | 10126  | DNAL4     | 0.0291 | 1.0693 |
| 11038 | A02 | 3170  | 79012  | CAMKV     | 0.0291 | 1.0693 |
| 11011 | G11 | 2787  | 4723   | NDUFV1    | 0.0291 | 1.0694 |
| 51011 | C02 | 53525 | 79707  | NOL9      | 0.0291 | 1.0694 |
| 11060 | B10 | 879   | 4143   | MAT1A     | 0.0291 | 1.0694 |
| 31035 | F01 | 14950 | 923    | CD6       | 0.0291 | 1.0694 |
| 51026 | A03 | 56839 | 162394 | SLFN5     | 0.0292 | 1.0694 |
| 11004 | E02 | 2781  | 90423  | ATP6V1E2  | 0.0292 | 1.0694 |
| 11009 | C03 | 6874  | 29956  | LASS2     | 0.0292 | 1.0695 |
| 11010 | D01 | 7406  | 445    | ASS1      | 0.0292 | 1.0695 |
| 11027 | H05 | 3431  | 23568  | ARL2BP    | 0.0292 | 1.0696 |
| 31039 | C04 | 984   | 5121   | PCP4      | 0.0292 | 1.0696 |
| 51020 | A10 | 55905 | 27067  | STAU2     | 0.0292 | 1.0696 |
| 11066 | E05 | 10030 | 6472   | SHMT2     | 0.0292 | 1.0696 |
| 31008 | E05 | 11463 | 119710 | C11orf74  | 0.0292 | 1.0696 |
| 11015 | C07 | 9070  | 7529   | YWHAB     | 0.0292 | 1.0697 |
| 31026 | D11 | 13857 | 89872  | AQP10     | 0.0293 | 1.0697 |
| 51003 | H01 | 52760 | 283349 | RASSF3    | 0.0293 | 1.0698 |
| 51011 | C04 | 54644 | 26586  | CKAP2     | 0.0293 | 1.0698 |
| 11046 | C09 | 2458  | 56257  | MEPCE     | 0.0293 | 1.0698 |
| 11081 | B11 | 3354  | 284912 | LOC284912 | 0.0293 | 1.0698 |
| 31015 | G07 | 12794 | 10190  | TXNDC9    | 0.0293 | 1.0698 |
| 11019 | B09 | 4682  | 6182   | MRPL12    | 0.0293 | 1.0698 |
| 51008 | G06 | 55142 | 8938   | BAIAP3    | 0.0293 | 1.0699 |
| 51005 | A04 | 56799 | NA     | NA        | 0.0293 | 1.0699 |
| 51026 | D02 | 56921 | 6238   | RRBP1     | 0.0293 | 1.0699 |
| 51008 | A08 | 55204 | 29881  | NPC1L1    | 0.0293 | 1.0699 |
| 11014 | F02 | 7065  | 60493  | FASTKD5   | 0.0293 | 1.0699 |
| 11057 | A11 | 4919  | 79723  | SUV39H2   | 0.0293 | 1.0699 |
| 11078 | B11 | 2055  | 11218  | DDX20     | 0.0294 | 1.0699 |
| 11073 | D01 | 8932  | 56893  | UBQLN4    | 0.0294 | 1.0700 |
| 31020 | A05 | 13091 | 3176   | HNMT      | 0.0294 | 1.0700 |
| 11085 | D09 | 3296  | 307    | ANXA4     | 0.0294 | 1.0700 |
| 31033 | D08 | 14855 | 2029   | ENSA      | 0.0294 | 1.0701 |
| 11022 | B11 | 7858  | 7029   | TFDP2     | 0.0294 | 1.0701 |
| 51008 | G08 | 53677 | 55075  | UACA      | 0.0294 | 1.0701 |
| 51021 | G02 | 56318 | 54084  | C21orf29  | 0.0294 | 1.0701 |
| 51031 | G01 | 55507 | 151325 | MYADML    | 0.0294 | 1.0702 |

|       |     |       |           |            |        |        |
|-------|-----|-------|-----------|------------|--------|--------|
| 11083 | B03 | 8120  | 4062      | LY6H       | 0.0295 | 1.0702 |
| 11053 | B03 | 4402  | 83592     | AKR1E2     | 0.0295 | 1.0702 |
| 11077 | C03 | 1748  | 91833     | WDR20      | 0.0295 | 1.0702 |
| 31037 | B04 | 12416 | 9924      | PAN2       | 0.0295 | 1.0702 |
| 11077 | D03 | 1316  | 29068     | ZBTB44     | 0.0295 | 1.0702 |
| 11055 | F12 | 507   | 54996     | MOSC2      | 0.0295 | 1.0703 |
| 11079 | E08 | 3039  | 9879      | DDX46      | 0.0295 | 1.0703 |
| 51011 | B06 | 54877 | 29943     | PADI1      | 0.0295 | 1.0703 |
| 11054 | D02 | 7302  | 2208      | FCER2      | 0.0295 | 1.0703 |
| 11074 | C05 | 8729  | 57018     | CCNL1      | 0.0295 | 1.0703 |
| 51010 | G01 | 53810 | 10156     | RASA4      | 0.0295 | 1.0703 |
| 51021 | E05 | 55872 | 114805    | GALNT13    | 0.0295 | 1.0703 |
| 31009 | A06 | 11332 | 253152    | EPHX4      | 0.0295 | 1.0704 |
| 31002 | F04 | 10412 | 59338     | PLEKHA1    | 0.0295 | 1.0704 |
| 11013 | B03 | 873   | 80255     | SLC35F5    | 0.0295 | 1.0704 |
| 11058 | D04 | 4215  | 633       | BGN        | 0.0295 | 1.0704 |
| 11088 | G10 | 411   | 6734      | SRPR       | 0.0296 | 1.0704 |
| 31011 | H05 | 12173 | 6168      | RPL37A     | 0.0296 | 1.0705 |
| 11020 | A05 | 7221  | 205       | AK4        | 0.0296 | 1.0706 |
| 11016 | A01 | 5736  | 84791     | C1orf97    | 0.0297 | 1.0707 |
| 11088 | B12 | 2916  | 10712     | FAM189B    | 0.0297 | 1.0708 |
| 11017 | G05 | 6436  | 55110     | MAGOHB     | 0.0297 | 1.0708 |
| 31034 | E01 | 14834 | 3778      | KCNMA1     | 0.0297 | 1.0708 |
| 31003 | D03 | 10558 | 9910      | RABGAP1L   | 0.0297 | 1.0709 |
| 11062 | F02 | 5896  | 191       | AHCY       | 0.0297 | 1.0709 |
| 11018 | F08 | 5370  | 6048      | RNF5       | 0.0298 | 1.0709 |
| 11087 | D11 | 9458  | 84106     | PRAM1      | 0.0298 | 1.0709 |
| 31003 | H05 | 10687 | 163059    | ZNF433     | 0.0298 | 1.0710 |
| 11060 | G04 | 247   | 55884     | WSB2       | 0.0298 | 1.0710 |
| 51008 | A12 | 56890 | 51594     | NBAS       | 0.0298 | 1.0711 |
| 51001 | A01 | 55989 | 100144596 | NCRNA00029 | 0.0298 | 1.0711 |
| 31044 | H04 | 7437  | 3185      | HNRNPF     | 0.0298 | 1.0711 |
| 31020 | B05 | 13291 | 79712     | GTDC1      | 0.0298 | 1.0711 |
| 51023 | A11 | 54634 | 4843      | NOS2       | 0.0298 | 1.0711 |
| 51026 | D03 | 56258 | 492       | ATP2B3     | 0.0299 | 1.0712 |
| 31022 | A01 | 13354 | 149986    | LSM14B     | 0.0299 | 1.0712 |
| 51026 | G09 | 56695 | 253769    | WDR27      | 0.0299 | 1.0712 |
| 11069 | H03 | 4735  | 55802     | DCP1A      | 0.0299 | 1.0713 |
| 51027 | C02 | 55383 | 204962    | SLC44A5    | 0.0299 | 1.0713 |
| 11053 | H08 | 4313  | 10362     | HMG20B     | 0.0299 | 1.0713 |
| 51025 | D09 | 53197 | 23368     | PPP1R13B   | 0.0299 | 1.0714 |
| 11047 | B08 | 7038  | 56616     | DIABLO     | 0.0299 | 1.0714 |
| 51015 | G03 | 52803 | 134829    | CLVS2      | 0.0300 | 1.0715 |
| 11055 | D03 | 8522  | 22977     | AKR7A3     | 0.0300 | 1.0715 |

|       |     |       |        |          |        |        |
|-------|-----|-------|--------|----------|--------|--------|
| 11084 | F11 | 6659  | 54165  | DCUNID1  | 0.0300 | 1.0715 |
| 11006 | H04 | 5433  | 3921   | RPSA     | 0.0300 | 1.0716 |
| 11055 | F03 | 4412  | 79173  | C19orf57 | 0.0300 | 1.0716 |
| 11026 | F11 | 788   | 51639  | SF3B14   | 0.0301 | 1.0716 |
| 31016 | B11 | 12735 | 3242   | HPD      | 0.0301 | 1.0717 |
| 11039 | D11 | 1360  | 28968  | SLC6A16  | 0.0301 | 1.0717 |
| 11050 | G03 | 2205  | 23498  | HAAO     | 0.0301 | 1.0717 |
| 11003 | F04 | 5213  | 84836  | ABHD14B  | 0.0301 | 1.0717 |
| 11020 | F11 | 3680  | 9526   | MPDU1    | 0.0301 | 1.0717 |
| 11034 | G02 | 7921  | 51102  | MECR     | 0.0301 | 1.0718 |
| 11009 | F08 | 8836  | 3785   | KCNQ2    | 0.0301 | 1.0718 |
| 11078 | B09 | 6160  | 9877   | ZC3H11A  | 0.0301 | 1.0718 |
| 31031 | H03 | 14647 | 337867 | UBAC2    | 0.0302 | 1.0719 |
| 11087 | B01 | 1930  | 84938  | ATG4C    | 0.0302 | 1.0719 |
| 11021 | B04 | 7624  | 3001   | GZMA     | 0.0302 | 1.0720 |
| 11065 | B07 | 7841  | 995    | CDC25C   | 0.0302 | 1.0720 |
| 11061 | E12 | 147   | 5817   | PVR      | 0.0302 | 1.0720 |
| 51011 | A01 | 54481 | 8754   | ADAM9    | 0.0302 | 1.0720 |
| 11027 | A09 | 7983  | 29097  | CNIH4    | 0.0302 | 1.0721 |
| 51023 | A04 | 56323 | 10149  | GPR64    | 0.0303 | 1.0721 |
| 51012 | F02 | 54928 | 9389   | SLC22A14 | 0.0303 | 1.0722 |
| 11053 | C01 | 783   | 60496  | AASDHPPT | 0.0303 | 1.0722 |
| 11068 | E11 | 8036  | 800    | CALD1    | 0.0303 | 1.0722 |
| 11022 | C02 | 7213  | 9047   | SH2D2A   | 0.0303 | 1.0722 |
| 11086 | F08 | 6894  | 7027   | TFDP1    | 0.0303 | 1.0723 |
| 11089 | C04 | 1115  | 9362   | CPNE6    | 0.0303 | 1.0724 |
| 11057 | E01 | 9466  | 1524   | CX3CR1   | 0.0303 | 1.0724 |
| 11067 | D01 | 7315  | 55735  | DNAJC11  | 0.0304 | 1.0725 |
| 11050 | G08 | 1828  | 140461 | ASB8     | 0.0304 | 1.0726 |
| 11022 | H08 | 3643  | 8890   | EIF2B4   | 0.0305 | 1.0726 |
| 11080 | D11 | 6043  | 7407   | VAR5     | 0.0305 | 1.0727 |
| 11059 | C06 | 1963  | 11103  | KRR1     | 0.0305 | 1.0727 |
| 31033 | C11 | 14844 | 283    | ANG      | 0.0305 | 1.0727 |
| 11044 | A06 | 8306  | 58498  | MYL7     | 0.0305 | 1.0727 |
| 11086 | C10 | 7669  | 3597   | IL13RA1  | 0.0305 | 1.0727 |
| 11006 | E01 | 9211  | 348487 | FAM131C  | 0.0305 | 1.0727 |
| 51011 | G02 | 52976 | 92255  | LMBRD2   | 0.0305 | 1.0728 |
| 11066 | C01 | 727   | 1802   | DPH2     | 0.0306 | 1.0729 |
| 11009 | A09 | 3250  | 10121  | ACTR1A   | 0.0306 | 1.0729 |
| 31018 | C12 | 12873 | 148738 | HFE2     | 0.0306 | 1.0729 |
| 11051 | A09 | 4379  | 55061  | SUSD4    | 0.0306 | 1.0729 |
| 11005 | G10 | 7545  | 10077  | TSPAN32  | 0.0306 | 1.0730 |
| 11006 | G07 | 7179  | 6187   | RPS2     | 0.0306 | 1.0730 |
| 11046 | F04 | 6925  | 79056  | PRRG4    | 0.0306 | 1.0731 |

|       |     |       |           |              |        |        |
|-------|-----|-------|-----------|--------------|--------|--------|
| 31002 | G06 | 10456 | 93979     | CPA5         | 0.0307 | 1.0732 |
| 11007 | E05 | 419   | 10067     | SCAMP3       | 0.0307 | 1.0732 |
| 31005 | E02 | 10994 | 554236    | DPY19L2P1    | 0.0307 | 1.0732 |
| 31044 | E01 | 8990  | 100132288 | LOC100132288 | 0.0307 | 1.0732 |
| 51035 | A02 | 54415 | 84107     | ZIC4         | 0.0307 | 1.0733 |
| 11011 | C05 | 2889  | 7434      | VIPR2        | 0.0308 | 1.0734 |
| 31008 | D02 | 11327 | 51491     | NOP16        | 0.0308 | 1.0735 |
| 11057 | B01 | 856   | 170082    | TCEANC       | 0.0308 | 1.0735 |
| 11017 | F08 | 9179  | 10712     | FAM189B      | 0.0308 | 1.0735 |
| 11002 | G09 | 8280  | 136       | ADORA2B      | 0.0308 | 1.0735 |
| 31028 | C01 | 14443 | 93099     | DMKN         | 0.0308 | 1.0735 |
| 11074 | D11 | 5729  | 7352      | UCP3         | 0.0308 | 1.0736 |
| 11070 | A03 | 9291  | 115362    | GBP5         | 0.0308 | 1.0736 |
| 11039 | B09 | 7353  | 25862     | USP49        | 0.0309 | 1.0736 |
| 31007 | G06 | 10970 | 165215    | FAM171B      | 0.0309 | 1.0737 |
| 11074 | H06 | 4168  | 1810      | DR1          | 0.0309 | 1.0737 |
| 11015 | G04 | 5581  | 51569     | UFM1         | 0.0309 | 1.0737 |
| 31008 | A11 | 11482 | 29777     | ABT1         | 0.0309 | 1.0737 |
| 11019 | C01 | 6971  | 79637     | ARMC7        | 0.0309 | 1.0737 |
| 31027 | E12 | 15019 | 57552     | NCEH1        | 0.0309 | 1.0737 |
| 11059 | A12 | 4483  | 84287     | ZDHHC16      | 0.0309 | 1.0738 |
| 11012 | B12 | 2910  | 51421     | AMOTL2       | 0.0309 | 1.0738 |
| 11067 | E03 | 6949  | 3035      | HARS         | 0.0309 | 1.0738 |
| 11058 | G08 | 9815  | 11033     | ADAP1        | 0.0309 | 1.0738 |
| 31010 | C08 | 11545 | 23295     | MGRN1        | 0.0310 | 1.0739 |
| 11021 | F07 | 3577  | 55192     | DNAJC17      | 0.0310 | 1.0740 |
| 51015 | H03 | 53004 | 79722     | ANKRD55      | 0.0310 | 1.0741 |
| 51035 | A10 | 54011 | 8787      | RGS9         | 0.0311 | 1.0741 |
| 11044 | B11 | 4533  | 4715      | NDUFB9       | 0.0311 | 1.0741 |
| 31017 | G07 | 13050 | 50807     | ASAP1        | 0.0311 | 1.0741 |
| 31008 | B07 | 11414 | 399665    | FAM102A      | 0.0311 | 1.0742 |
| 51005 | H02 | 53993 | 6489      | ST8SIA1      | 0.0311 | 1.0742 |
| 11062 | C05 | 1069  | 3783      | KCNN4        | 0.0311 | 1.0742 |
| 11074 | F11 | 1004  | 127829    | ARL8A        | 0.0311 | 1.0742 |
| 31004 | F11 | 11033 | 6137      | RPL13        | 0.0311 | 1.0743 |
| 31042 | H04 | 6343  | 9071      | CLDN10       | 0.0311 | 1.0743 |
| 11081 | F10 | 8658  | 832       | CAPZB        | 0.0311 | 1.0743 |
| 11057 | G06 | 8416  | 1641      | DCX          | 0.0311 | 1.0744 |
| 51004 | B06 | 55088 | 442247    | RFPL4B       | 0.0312 | 1.0744 |
| 11022 | H11 | 6089  | 79053     | ALG8         | 0.0312 | 1.0744 |
| 11042 | G03 | 8304  | 26279     | PLA2G2D      | 0.0312 | 1.0744 |
| 31040 | D07 | 10124 | 55337     | C19orf66     | 0.0312 | 1.0744 |
| 11057 | C01 | 473   | 7852      | CXCR4        | 0.0312 | 1.0745 |
| 31004 | E02 | 10627 | 27136     | MORC1        | 0.0312 | 1.0745 |

|       |     |       |        |          |        |        |
|-------|-----|-------|--------|----------|--------|--------|
| 11030 | A11 | 1071  | 65260  | C1orf163 | 0.0312 | 1.0745 |
| 11079 | G10 | 9493  | 699    | BUB1     | 0.0312 | 1.0745 |
| 11037 | F08 | 3378  | 79085  | SLC25A23 | 0.0312 | 1.0745 |
| 51005 | A01 | 54134 | 51270  | TFDP3    | 0.0312 | 1.0746 |
| 31012 | C07 | 11854 | 348110 | C15orf38 | 0.0312 | 1.0746 |
| 31007 | A11 | 11803 | 30834  | ZNRD1    | 0.0313 | 1.0746 |
| 31017 | A03 | 12670 | 65123  | INTS3    | 0.0313 | 1.0746 |
| 11076 | E08 | 4330  | 334    | APLP2    | 0.0313 | 1.0747 |
| 51002 | F07 | 52922 | 26223  | FBXL21   | 0.0313 | 1.0747 |
| 11001 | A02 | 168   | 6157   | RPL27A   | 0.0313 | 1.0747 |
| 11071 | F01 | 601   | 3985   | LIMK2    | 0.0313 | 1.0748 |
| 11032 | D12 | 8340  | 2487   | FRZB     | 0.0313 | 1.0748 |
| 11087 | A03 | 3949  | 79171  | RBM42    | 0.0314 | 1.0749 |
| 31008 | B08 | 11359 | 343    | AQP8     | 0.0314 | 1.0749 |
| 51023 | F07 | 53574 | 84893  | FBXO18   | 0.0314 | 1.0750 |
| 51004 | A10 | 56044 | 339457 | C1orf222 | 0.0314 | 1.0750 |
| 11012 | A05 | 3619  | 55238  | SLC38A7  | 0.0314 | 1.0750 |
| 11002 | A06 | 261   | 90226  | UCN2     | 0.0314 | 1.0751 |
| 11083 | H04 | 9289  | 219995 | MS4A15   | 0.0314 | 1.0751 |
| 11002 | D10 | 9220  | 79956  | ERMP1    | 0.0315 | 1.0751 |
| 31044 | A04 | 3333  | 10452  | TOMM40   | 0.0315 | 1.0751 |
| 11060 | B03 | 5922  | 79075  | DSCC1    | 0.0315 | 1.0752 |
| 11008 | B04 | 5666  | 2357   | FPR1     | 0.0315 | 1.0752 |
| 11062 | H01 | 2391  | 5000   | ORC4L    | 0.0315 | 1.0752 |
| 11008 | E04 | 4680  | 2630   | GBAP1    | 0.0316 | 1.0754 |
| 51023 | C08 | 56061 | 55201  | MAP1S    | 0.0316 | 1.0754 |
| 11088 | D06 | 9952  | 64089  | SNX16    | 0.0316 | 1.0754 |
| 11009 | D06 | 2745  | 7268   | TTC4     | 0.0316 | 1.0754 |
| 11019 | D11 | 7788  | 79763  | ISOC2    | 0.0316 | 1.0754 |
| 11058 | F05 | 9429  | 3284   | HSD3B2   | 0.0316 | 1.0755 |
| 11012 | B05 | 6644  | 26580  | BSCL2    | 0.0316 | 1.0755 |
| 11085 | F08 | 3843  | 79184  | BRCC3    | 0.0316 | 1.0755 |
| 11029 | F06 | 5232  | 27335  | EIF3K    | 0.0316 | 1.0755 |
| 51022 | F08 | 55868 | 5284   | PIGR     | 0.0316 | 1.0755 |
| 31030 | H05 | 14204 | 9681   | DEPDC5   | 0.0317 | 1.0757 |
| 11009 | A01 | 903   | 8405   | SPOP     | 0.0317 | 1.0757 |
| 51035 | H09 | 54829 | 2155   | F7       | 0.0317 | 1.0757 |
| 31016 | B04 | 12544 | 7391   | USF1     | 0.0317 | 1.0757 |
| 11084 | E09 | 3331  | 29844  | TFPT     | 0.0317 | 1.0757 |
| 51012 | D02 | 53933 | 10335  | MRVII    | 0.0317 | 1.0757 |
| 11047 | D07 | 6269  | 134288 | TMEM174  | 0.0317 | 1.0757 |
| 11017 | C03 | 4677  | 6229   | RPS24    | 0.0317 | 1.0758 |
| 31033 | C08 | 14947 | 2498   | FTHL3    | 0.0317 | 1.0758 |
| 11073 | B04 | 3887  | 25873  | RPL36    | 0.0317 | 1.0758 |

|       |     |       |        |          |        |        |
|-------|-----|-------|--------|----------|--------|--------|
| 11032 | E10 | 7568  | 147015 | DHRS13   | 0.0317 | 1.0758 |
| 11043 | G11 | 4492  | 6880   | TAF9     | 0.0318 | 1.0759 |
| 11086 | C03 | 4431  | 7456   | WIPF1    | 0.0318 | 1.0760 |
| 11054 | C01 | 2211  | 157773 | C8orf48  | 0.0318 | 1.0760 |
| 31010 | B12 | 11338 | 283431 | GAS2L3   | 0.0318 | 1.0760 |
| 11075 | G10 | 5967  | 6009   | RHEB     | 0.0318 | 1.0760 |
| 11029 | C03 | 8224  | 79794  | C12orf49 | 0.0318 | 1.0760 |
| 11051 | B02 | 553   | 84933  | C8orf76  | 0.0318 | 1.0761 |
| 11013 | D09 | 8105  | 3854   | KRT6B    | 0.0319 | 1.0761 |
| 11003 | B06 | 9738  | 11094  | C9orf7   | 0.0319 | 1.0761 |
| 31002 | D02 | 10358 | 9715   | FAM131B  | 0.0319 | 1.0762 |
| 11042 | D12 | 5549  | 8674   | VAMP4    | 0.0319 | 1.0762 |
| 11018 | C04 | 6671  | 6500   | SKP1     | 0.0319 | 1.0762 |
| 11004 | G02 | 673   | 7879   | RAB7A    | 0.0319 | 1.0763 |
| 51014 | D10 | 52999 | 253782 | LASS6    | 0.0319 | 1.0763 |
| 11049 | E05 | 8724  | 80347  | COASY    | 0.0319 | 1.0763 |
| 11022 | E01 | 7815  | 7429   | VIL1     | 0.0319 | 1.0763 |
| 11069 | C11 | 7699  | 2176   | FANCC    | 0.0320 | 1.0764 |
| 31026 | B10 | 13896 | 51032  | CELA2B   | 0.0320 | 1.0764 |
| 11036 | A07 | 1477  | 254268 | AKNAD1   | 0.0320 | 1.0764 |
| 11079 | H07 | 3630  | 4967   | OGDH     | 0.0320 | 1.0765 |
| 11051 | C01 | 5930  | 9337   | CNOT8    | 0.0320 | 1.0765 |
| 11047 | C11 | 1562  | 143471 | PSMA8    | 0.0320 | 1.0765 |
| 11044 | B12 | 236   | 11065  | UBE2C    | 0.0320 | 1.0766 |
| 11075 | D09 | 5810  | 387    | RHOA     | 0.0320 | 1.0766 |
| 11072 | B08 | 7305  | 10717  | AP4B1    | 0.0321 | 1.0766 |
| 11061 | H07 | 120   | 57559  | STAMBPL1 | 0.0321 | 1.0766 |
| 31005 | H03 | 11144 | 9671   | WSCD2    | 0.0321 | 1.0766 |
| 31042 | C09 | 5587  | 6696   | SPP1     | 0.0321 | 1.0767 |
| 31042 | D11 | 5679  | 51319  | RSRC1    | 0.0321 | 1.0767 |
| 31008 | F12 | 11550 | 9781   | RNF144A  | 0.0321 | 1.0767 |
| 51031 | D10 | 56139 | 120939 | C12orf59 | 0.0321 | 1.0767 |
| 31002 | C06 | 10313 | 124044 | SPATA2L  | 0.0321 | 1.0768 |
| 51009 | B07 | 53094 | 2890   | GRIA1    | 0.0321 | 1.0768 |
| 11046 | A12 | 6930  | 199857 | ALG14    | 0.0321 | 1.0768 |
| 11071 | E04 | 6548  | 55734  | ZFP64    | 0.0322 | 1.0769 |
| 11022 | E03 | 7573  | 5002   | SLC22A18 | 0.0322 | 1.0769 |
| 11075 | D10 | 5710  | 9659   | PDE4DIP  | 0.0322 | 1.0769 |
| 11008 | D12 | 2855  | 81847  | RNF146   | 0.0322 | 1.0769 |
| 11076 | C06 | 4334  | 5533   | PPP3CC   | 0.0322 | 1.0770 |
| 11036 | E10 | 3253  | 3875   | KRT18    | 0.0322 | 1.0770 |
| 31011 | E03 | 11600 | 7301   | TYRO3    | 0.0322 | 1.0770 |
| 31002 | B01 | 10253 | 284716 | RIMKLA   | 0.0322 | 1.0771 |
| 11048 | F02 | 204   | 51315  | KRCC1    | 0.0322 | 1.0771 |

|       |     |       |        |          |        |        |
|-------|-----|-------|--------|----------|--------|--------|
| 51005 | B07 | 54705 | 317701 | VN1R2    | 0.0323 | 1.0771 |
| 51011 | A04 | 54495 | 79054  | TRPM8    | 0.0323 | 1.0771 |
| 11047 | F09 | 7072  | 116238 | TLCD1    | 0.0323 | 1.0772 |
| 51014 | G01 | 52833 | 375611 | SLC26A5  | 0.0323 | 1.0772 |
| 31031 | E06 | 14528 | 221938 | MMD2     | 0.0323 | 1.0772 |
| 11005 | B11 | 8994  | 10712  | FAM189B  | 0.0323 | 1.0772 |
| 51035 | A04 | 54789 | 2538   | G6PC     | 0.0323 | 1.0772 |
| 31026 | C09 | 13844 | 55554  | KLK15    | 0.0323 | 1.0772 |
| 11017 | D02 | 3447  | 1174   | AP1S1    | 0.0323 | 1.0773 |
| 51005 | H06 | 54004 | 9210   | BMP15    | 0.0323 | 1.0773 |
| 51029 | C11 | 55331 | 55148  | UBR7     | 0.0323 | 1.0773 |
| 11006 | B01 | 6668  | 3127   | HLA-DRB5 | 0.0324 | 1.0774 |
| 11057 | B04 | 8452  | 2358   | FPR2     | 0.0324 | 1.0774 |
| 11022 | F06 | 7891  | 8723   | SNX4     | 0.0324 | 1.0775 |
| 51008 | F06 | 55134 | 23325  | KIAA1033 | 0.0324 | 1.0776 |
| 11008 | H08 | 6864  | 2752   | GLUL     | 0.0324 | 1.0776 |
| 11019 | H07 | 9119  | 81609  | SNX27    | 0.0325 | 1.0776 |
| 31016 | H02 | 12472 | 2961   | GTF2E2   | 0.0325 | 1.0776 |
| 31007 | G07 | 11189 | 55898  | UNC45A   | 0.0325 | 1.0776 |
| 11075 | C04 | 3795  | 11079  | RER1     | 0.0325 | 1.0777 |
| 11080 | C05 | 6049  | 83696  | TRAPPC9  | 0.0325 | 1.0777 |
| 51005 | B03 | 54496 | 317705 | VN1R5    | 0.0325 | 1.0778 |
| 11077 | D01 | 1061  | 1768   | DNAH6    | 0.0325 | 1.0778 |
| 51034 | A01 | 54562 | 80742  | PRR3     | 0.0325 | 1.0778 |
| 11067 | B01 | 9806  | 1577   | CYP3A5   | 0.0325 | 1.0778 |
| 11086 | E06 | 6148  | 56904  | SH3GLB2  | 0.0326 | 1.0778 |
| 51018 | C04 | 56777 | 337867 | UBAC2    | 0.0326 | 1.0779 |
| 51005 | F12 | 56278 | 1146   | CHRNA2   | 0.0326 | 1.0779 |
| 31014 | F04 | 12153 | 83716  | CRISPLD2 | 0.0326 | 1.0780 |
| 51020 | E01 | 56579 | 150472 | CBWD2    | 0.0326 | 1.0781 |
| 11045 | E03 | 251   | 396    | ARHGDI1  | 0.0326 | 1.0781 |
| 11027 | B09 | 353   | 11170  | FAM107A  | 0.0327 | 1.0781 |
| 31002 | F11 | 10321 | 125206 | SLC5A10  | 0.0327 | 1.0781 |
| 11001 | A07 | 228   | 9168   | TMSB10   | 0.0327 | 1.0782 |
| 11006 | G09 | 8171  | 84365  | MKI67IP  | 0.0327 | 1.0782 |
| 51029 | B10 | 55275 | 10342  | TFG      | 0.0327 | 1.0782 |
| 11001 | F11 | 10166 | 2330   | FMO5     | 0.0327 | 1.0782 |
| 11028 | E11 | 1991  | 127540 | HMGB4    | 0.0327 | 1.0782 |
| 31042 | D09 | 5618  | 9453   | GGPS1    | 0.0328 | 1.0783 |
| 31033 | G05 | 14824 | 552900 | BOLA2    | 0.0328 | 1.0784 |
| 11043 | E12 | 5504  | 29087  | THYN1    | 0.0328 | 1.0784 |
| 11081 | B04 | 9163  | 10019  | SH2B3    | 0.0328 | 1.0785 |
| 11054 | A11 | 118   | 6888   | TALDO1   | 0.0328 | 1.0785 |
| 11052 | F02 | 4019  | 1019   | CDK4     | 0.0329 | 1.0786 |



|       |     |       |        |           |        |        |
|-------|-----|-------|--------|-----------|--------|--------|
| 31007 | F06 | 10949 | 2015   | EMR1      | 0.0329 | 1.0786 |
| 31043 | B04 | 7878  | 652968 | GATSL3    | 0.0329 | 1.0786 |
| 11001 | A11 | 8790  | 56063  | C1orf91   | 0.0329 | 1.0787 |
| 11044 | G08 | 6946  | 64065  | PERP      | 0.0329 | 1.0787 |
| 11037 | C06 | 3733  | 2288   | FKBP4     | 0.0329 | 1.0787 |
| 11065 | C07 | 7391  | 3032   | HADHB     | 0.0329 | 1.0787 |
| 11088 | A05 | 7880  | 56243  | KIAA1217  | 0.0329 | 1.0787 |
| 11081 | H09 | 2880  | 8682   | PEA15     | 0.0330 | 1.0788 |
| 51001 | E09 | 54474 | 6887   | TAL2      | 0.0330 | 1.0789 |
| 11026 | D08 | 3352  | 6164   | RPL34     | 0.0330 | 1.0789 |
| 51027 | G09 | 55493 | 55857  | PLK1S1    | 0.0330 | 1.0789 |
| 11079 | E10 | 8331  | 25890  | ABI3BP    | 0.0330 | 1.0791 |
| 11075 | D03 | 1684  | 51013  | EXOSC1    | 0.0331 | 1.0791 |
| 51009 | E06 | 54341 | 5774   | PTPN3     | 0.0331 | 1.0792 |
| 51003 | F02 | 54347 | 56344  | CABP5     | 0.0331 | 1.0792 |
| 11082 | C08 | 2242  | 284440 | LOC284440 | 0.0331 | 1.0792 |
| 31043 | A05 | 6694  | 10586  | MAB21L2   | 0.0331 | 1.0793 |
| 11017 | E03 | 9056  | 54778  | RNF111    | 0.0331 | 1.0793 |
| 11003 | B04 | 5844  | 694    | BTG1      | 0.0332 | 1.0793 |
| 11015 | G03 | 5391  | 84848  | MGC16121  | 0.0332 | 1.0794 |
| 51027 | C08 | 56647 | 259307 | IL4I1     | 0.0332 | 1.0794 |
| 11052 | F11 | 1424  | 84572  | GNPTG     | 0.0332 | 1.0794 |
| 31011 | G04 | 11820 | 26064  | RAI14     | 0.0332 | 1.0794 |
| 51031 | F11 | 56495 | 121549 | ASCL4     | 0.0332 | 1.0794 |
| 11057 | B05 | 2695  | 84321  | THOC3     | 0.0332 | 1.0795 |
| 11071 | G10 | 8299  | 10044  | SH2D3C    | 0.0332 | 1.0795 |
| 11006 | G08 | 1496  | 645455 | CEP170L   | 0.0332 | 1.0795 |
| 11004 | G11 | 8116  | 192683 | SCAMP5    | 0.0332 | 1.0795 |
| 11024 | H03 | 9292  | 399979 | SNX19     | 0.0332 | 1.0795 |
| 11052 | D09 | 4187  | 54784  | ALKBH4    | 0.0332 | 1.0796 |
| 11035 | B11 | 1671  | 25953  | PNKD      | 0.0333 | 1.0796 |
| 11045 | E12 | 2998  | 6616   | SNAP25    | 0.0333 | 1.0796 |
| 11037 | F01 | 6580  | 11083  | DIDO1     | 0.0333 | 1.0796 |
| 51011 | F09 | 53613 | 3752   | KCND3     | 0.0333 | 1.0797 |
| 11014 | B02 | 2523  | 80020  | FOXRED2   | 0.0333 | 1.0797 |
| 11003 | E11 | 5525  | 54469  | ZFAND6    | 0.0333 | 1.0798 |
| 11009 | B08 | 441   | 81608  | FIP1L1    | 0.0333 | 1.0798 |
| 11080 | H09 | 10044 | 9669   | EIF5B     | 0.0334 | 1.0798 |
| 31038 | G11 | 10101 | 84619  | ZGPAT     | 0.0334 | 1.0799 |
| 11011 | B06 | 422   | 2023   | ENO1      | 0.0334 | 1.0799 |
| 11078 | C02 | 7332  | 583    | BBS2      | 0.0334 | 1.0799 |
| 31022 | E03 | 13357 | 353513 | VCY1B     | 0.0334 | 1.0799 |
| 11011 | E06 | 3953  | 3995   | FADS3     | 0.0334 | 1.0800 |
| 11018 | B12 | 9064  | 26586  | CKAP2     | 0.0334 | 1.0800 |

|       |     |       |        |          |        |        |
|-------|-----|-------|--------|----------|--------|--------|
| 31002 | A01 | 10662 | 55026  | FAM70A   | 0.0334 | 1.0800 |
| 51024 | A12 | 53359 | 25836  | NIPBL    | 0.0335 | 1.0801 |
| 11018 | B10 | 6384  | 51076  | CUTC     | 0.0335 | 1.0801 |
| 11043 | G08 | 2609  | 5831   | PYCR1    | 0.0335 | 1.0802 |
| 31032 | D03 | 14597 | 1600   | DAB1     | 0.0335 | 1.0802 |
| 31003 | C09 | 10639 | 83852  | SETDB2   | 0.0335 | 1.0802 |
| 31004 | F06 | 11002 | 442578 | STAG3L3  | 0.0335 | 1.0803 |
| 51012 | B09 | 54257 | 79782  | LRRC31   | 0.0336 | 1.0803 |
| 51035 | B04 | 54220 | 5460   | POU5F1   | 0.0336 | 1.0804 |
| 51013 | C10 | 54441 | 25794  | FSCN2    | 0.0336 | 1.0804 |
| 11087 | D06 | 624   | 5725   | PTBP1    | 0.0336 | 1.0804 |
| 31033 | E04 | 14794 | 58492  | ZNF77    | 0.0336 | 1.0804 |
| 11020 | B10 | 5653  | 84830  | C6orf105 | 0.0336 | 1.0804 |
| 51003 | C04 | 53065 | 3586   | IL10     | 0.0336 | 1.0805 |
| 11085 | A10 | 3926  | 56654  | NPDC1    | 0.0336 | 1.0805 |
| 11085 | A11 | 691   | 10726  | NUDC     | 0.0336 | 1.0805 |
| 11069 | B03 | 10107 | 51720  | UIMC1    | 0.0336 | 1.0805 |
| 11016 | H11 | 7865  | 8862   | APLN     | 0.0336 | 1.0805 |
| 11084 | H07 | 958   | 51700  | CYB5R2   | 0.0336 | 1.0805 |
| 11035 | D04 | 2000  | 11228  | RASSF8   | 0.0337 | 1.0806 |
| 11002 | C10 | 8469  | 79777  | ACBD4    | 0.0337 | 1.0806 |
| 51002 | A06 | 53015 | 434    | ASIP     | 0.0337 | 1.0806 |
| 11024 | E01 | 9228  | 29954  | POMT2    | 0.0337 | 1.0806 |
| 11029 | F01 | 1120  | 54965  | PIGX     | 0.0337 | 1.0807 |
| 11068 | E03 | 2234  | 91133  | L3MBTL4  | 0.0337 | 1.0807 |
| 11055 | B03 | 5942  | 124540 | MSI2     | 0.0337 | 1.0807 |
| 11039 | F12 | 7835  | 10979  | FERMT2   | 0.0337 | 1.0807 |
| 51018 | B10 | 56115 | 22919  | MAPRE1   | 0.0337 | 1.0808 |
| 31040 | D02 | 1226  | 9867   | PJA2     | 0.0338 | 1.0808 |
| 31018 | F03 | 13088 | 6590   | SLPI     | 0.0338 | 1.0809 |
| 51035 | B09 | 53639 | 57528  | KCTD16   | 0.0338 | 1.0809 |
| 11004 | G03 | 1808  | 79074  | C2orf49  | 0.0338 | 1.0809 |
| 11079 | C07 | 9657  | 9793   | CKAP5    | 0.0338 | 1.0810 |
| 11047 | G10 | 6953  | 79666  | PLEKHF2  | 0.0338 | 1.0810 |
| 11042 | F12 | 5812  | 5320   | PLA2G2A  | 0.0338 | 1.0810 |
| 11088 | B01 | 9349  | 83897  | KRTAP3-2 | 0.0339 | 1.0811 |
| 11076 | B08 | 1341  | 3840   | KPNA4    | 0.0339 | 1.0812 |
| 31028 | D04 | 14118 | 57171  | DOLPP1   | 0.0339 | 1.0812 |
| 31039 | D03 | 9614  | 10044  | SH2D3C   | 0.0339 | 1.0812 |
| 11073 | D11 | 4219  | 404033 | FLJ34077 | 0.0340 | 1.0814 |
| 31040 | A04 | 9210  | 23630  | KCNE1L   | 0.0340 | 1.0814 |
| 11019 | G07 | 7886  | 91442  | C19orf40 | 0.0340 | 1.0815 |
| 51016 | G11 | 55997 | 91869  | RFT1     | 0.0340 | 1.0815 |
| 51022 | F01 | 56262 | 64101  | LRRC4    | 0.0341 | 1.0816 |

|       |     |       |        |           |        |        |
|-------|-----|-------|--------|-----------|--------|--------|
| 11052 | G05 | 2447  | 57179  | KIAA1191  | 0.0341 | 1.0817 |
| 11050 | F01 | 1123  | 25830  | SULT4A1   | 0.0341 | 1.0817 |
| 11086 | C08 | 6639  | 56659  | KCNK13    | 0.0341 | 1.0817 |
| 31009 | G08 | 11455 | 128209 | KLF17     | 0.0341 | 1.0817 |
| 11069 | E07 | 4171  | 10758  | TRAF3IP2  | 0.0342 | 1.0818 |
| 51021 | C03 | 55827 | 10720  | UGT2B11   | 0.0342 | 1.0819 |
| 11063 | C07 | 160   | 3200   | HOXA3     | 0.0342 | 1.0819 |
| 51028 | A06 | 53381 | 440138 | ALG11     | 0.0342 | 1.0819 |
| 11037 | E04 | 6534  | 54971  | BANP      | 0.0342 | 1.0819 |
| 11064 | D03 | 2712  | 4783   | NFIL3     | 0.0342 | 1.0820 |
| 11007 | D12 | 1874  | 51109  | RDH11     | 0.0342 | 1.0820 |
| 11016 | B04 | 7997  | 6284   | S100A13   | 0.0342 | 1.0820 |
| 11012 | B03 | 3620  | 56052  | ALG1      | 0.0342 | 1.0820 |
| 31037 | F09 | 14411 | 388965 | FUNDC2P2  | 0.0342 | 1.0820 |
| 51004 | H11 | 54124 | 254158 | CXorf58   | 0.0343 | 1.0821 |
| 11021 | D09 | 5704  | 1353   | COX11     | 0.0343 | 1.0821 |
| 11054 | E03 | 6138  | 4070   | TACSTD2   | 0.0343 | 1.0821 |
| 11045 | A09 | 9284  | 22797  | TFEC      | 0.0343 | 1.0821 |
| 11060 | E08 | 7780  | 51547  | SIRT7     | 0.0343 | 1.0821 |
| 51029 | G11 | 56462 | 84109  | QRFP      | 0.0343 | 1.0821 |
| 51023 | C10 | 54832 | 23431  | AP4E1     | 0.0343 | 1.0821 |
| 11064 | F07 | 8725  | 63893  | UBE2O     | 0.0343 | 1.0821 |
| 11029 | A03 | 3126  | 11072  | DUSP14    | 0.0343 | 1.0821 |
| 11050 | E04 | 8919  | 84858  | ZNF503    | 0.0343 | 1.0822 |
| 11046 | B11 | 4640  | 84293  | C10orf58  | 0.0343 | 1.0822 |
| 11025 | B07 | 9613  | 23175  | LPIN1     | 0.0343 | 1.0822 |
| 51012 | E10 | 54292 | 53630  | BCMO1     | 0.0343 | 1.0822 |
| 51025 | G05 | 53228 | 374977 | C1orf175  | 0.0343 | 1.0822 |
| 11049 | A12 | 8573  | 4907   | NT5E      | 0.0343 | 1.0823 |
| 11054 | G01 | 1846  | 26240  | FAM50B    | 0.0343 | 1.0823 |
| 51029 | G02 | 56826 | 9407   | TMPRSS11D | 0.0344 | 1.0823 |
| 51032 | B05 | 55528 | 55246  | CCDC25    | 0.0344 | 1.0823 |
| 11045 | C01 | 1872  | 29887  | SNX10     | 0.0344 | 1.0824 |
| 11051 | E07 | 5160  | 56910  | STARD7    | 0.0344 | 1.0824 |
| 11019 | G02 | 7145  | 25880  | TMEM186   | 0.0344 | 1.0824 |
| 11051 | F10 | 2744  | 29088  | MRPL15    | 0.0344 | 1.0824 |
| 11007 | H03 | 6936  | 4841   | NONO      | 0.0344 | 1.0824 |
| 11049 | G03 | 6220  | 23659  | PLA2G15   | 0.0344 | 1.0825 |
| 11015 | G09 | 6315  | 57226  | LYRM2     | 0.0344 | 1.0825 |
| 31037 | E08 | 14218 | 441150 | C6orf226  | 0.0344 | 1.0825 |
| 11003 | D03 | 9904  | 2882   | GPX7      | 0.0345 | 1.0826 |
| 11037 | E10 | 7439  | 10152  | ABI2      | 0.0345 | 1.0827 |
| 11015 | G06 | 5523  | 5349   | FXYD3     | 0.0345 | 1.0828 |
| 31038 | H04 | 14269 | 342132 | ZNF774    | 0.0346 | 1.0829 |

|       |     |       |        |          |        |        |
|-------|-----|-------|--------|----------|--------|--------|
| 51027 | H02 | 53173 | 2686   | GGT7     | 0.0346 | 1.0829 |
| 11016 | C05 | 7739  | 2034   | EPAS1    | 0.0346 | 1.0830 |
| 11060 | E02 | 7289  | 7107   | GPR137B  | 0.0346 | 1.0830 |
| 11035 | E11 | 3270  | 8498   | RANBP3   | 0.0347 | 1.0831 |
| 11073 | F07 | 1690  | 222255 | ATXN7L1  | 0.0347 | 1.0831 |
| 11077 | B01 | 1327  | 8395   | PIP5K1B  | 0.0347 | 1.0831 |
| 11081 | F07 | 6974  | 55505  | NOP10    | 0.0347 | 1.0832 |
| 11088 | A08 | 9491  | 4542   | MYO1F    | 0.0347 | 1.0832 |
| 51001 | F10 | 52621 | 83740  | H2AFB3   | 0.0347 | 1.0833 |
| 51010 | A02 | 53129 | 84230  | LRRC8C   | 0.0347 | 1.0833 |
| 31006 | F05 | 10952 | 113457 | TUBA3D   | 0.0347 | 1.0833 |
| 11034 | E04 | 5387  | 23212  | RRS1     | 0.0347 | 1.0833 |
| 11068 | D05 | 4952  | 6572   | SLC18A3  | 0.0348 | 1.0834 |
| 11055 | A06 | 4085  | 5500   | PPP1CB   | 0.0348 | 1.0834 |
| 51008 | A02 | 53931 | 9705   | ST18     | 0.0348 | 1.0835 |
| 51008 | C04 | 53603 | 6599   | SMARCC1  | 0.0348 | 1.0836 |
| 31008 | D09 | 11546 | 140680 | C20orf96 | 0.0349 | 1.0836 |
| 31010 | G07 | 11750 | 84124  | ZNF394   | 0.0349 | 1.0836 |
| 11045 | E09 | 6413  | 29093  | MRPL22   | 0.0349 | 1.0836 |
| 11003 | H03 | 9855  | 140290 | TCP10L   | 0.0349 | 1.0836 |
| 31019 | E04 | 13187 | 5281   | PIGF     | 0.0349 | 1.0837 |
| 11042 | E06 | 8624  | 84971  | ATG4D    | 0.0349 | 1.0838 |
| 51004 | D07 | 53854 | 64077  | LHPP     | 0.0349 | 1.0838 |
| 11070 | D07 | 126   | 10548  | TM9SF1   | 0.0350 | 1.0838 |
| 31006 | G07 | 11114 | 1890   | TYMP     | 0.0350 | 1.0838 |
| 31043 | D01 | 4933  | 2039   | EPB49    | 0.0350 | 1.0838 |
| 51013 | F11 | 52816 | 160428 | ALDH1L2  | 0.0350 | 1.0838 |
| 11079 | D09 | 10232 | 5097   | PCDH1    | 0.0350 | 1.0839 |
| 31003 | F07 | 10453 | 8796   | SCEL     | 0.0350 | 1.0839 |
| 11073 | B03 | 4346  | 7356   | SCGB1A1  | 0.0350 | 1.0839 |
| 11016 | E05 | 3387  | 522    | ATP5J    | 0.0350 | 1.0840 |
| 11047 | C01 | 3832  | 51154  | MRTO4    | 0.0350 | 1.0840 |
| 11008 | C02 | 2804  | 6094   | ROM1     | 0.0350 | 1.0840 |
| 31010 | F04 | 11466 | 7360   | UGP2     | 0.0351 | 1.0841 |
| 31025 | G04 | 13515 | 56123  | PCDHB13  | 0.0351 | 1.0841 |
| 11084 | D12 | 8349  | 474354 | LRRC18   | 0.0351 | 1.0841 |
| 11073 | F02 | 8869  | 51710  | ZNF44    | 0.0351 | 1.0842 |
| 51029 | D10 | 56796 | 55998  | NXF5     | 0.0351 | 1.0842 |
| 11036 | A12 | 8354  | 79831  | JMJD5    | 0.0351 | 1.0842 |
| 11071 | E05 | 3561  | 9945   | GFPT2    | 0.0351 | 1.0843 |
| 51031 | G05 | 56581 | 54550  | NECAB2   | 0.0352 | 1.0843 |
| 11004 | F08 | 702   | 50862  | RNF141   | 0.0352 | 1.0844 |
| 11014 | E07 | 2913  | 4849   | CNOT3    | 0.0352 | 1.0844 |
| 31010 | E08 | 11697 | 55164  | SHQ1     | 0.0352 | 1.0844 |

|       |     |       |        |           |        |        |
|-------|-----|-------|--------|-----------|--------|--------|
| 11035 | E09 | 1697  | 151393 | FAM82A1   | 0.0352 | 1.0845 |
| 11052 | F01 | 3876  | 6678   | SPARC     | 0.0352 | 1.0845 |
| 11065 | B11 | 5132  | 2937   | GSS       | 0.0352 | 1.0845 |
| 51023 | F10 | 54430 | 109    | ADCY3     | 0.0353 | 1.0846 |
| 11016 | A04 | 5832  | 53826  | FXVD6     | 0.0353 | 1.0846 |
| 31041 | A04 | 4176  | 83475  | DOHH      | 0.0353 | 1.0846 |
| 11040 | B06 | 4901  | 84808  | C1orf170  | 0.0353 | 1.0847 |
| 11010 | F06 | 2723  | 4781   | NFIB      | 0.0353 | 1.0847 |
| 11020 | C02 | 5989  | 598    | BCL2L1    | 0.0353 | 1.0848 |
| 31016 | A07 | 12469 | 6903   | TBCC      | 0.0354 | 1.0849 |
| 11050 | F03 | 4111  | 553115 | PEF1      | 0.0354 | 1.0849 |
| 31025 | D11 | 14085 | 8332   | HIST1H2AL | 0.0354 | 1.0849 |
| 11065 | A09 | 5758  | 2327   | FMO2      | 0.0354 | 1.0849 |
| 11003 | A04 | 9021  | 5378   | PMS1      | 0.0354 | 1.0850 |
| 31038 | B10 | 5151  | 27173  | SLC39A1   | 0.0354 | 1.0850 |
| 11014 | D06 | 6036  | 29889  | GNL2      | 0.0355 | 1.0851 |
| 11039 | E06 | 2301  | 317781 | DDX51     | 0.0355 | 1.0851 |
| 11044 | C10 | 6810  | 6001   | RGS10     | 0.0355 | 1.0851 |
| 11068 | H02 | 7881  | 90933  | TRIM41    | 0.0355 | 1.0851 |
| 31014 | G02 | 12181 | 140459 | ASB6      | 0.0355 | 1.0852 |
| 11045 | A03 | 41    | 3148   | HMGB2     | 0.0355 | 1.0852 |
| 31008 | A10 | 11442 | 286336 | FAM78A    | 0.0355 | 1.0852 |
| 31012 | F09 | 11872 | 7168   | TPM1      | 0.0355 | 1.0852 |
| 51006 | H06 | 54284 | 283208 | P4HA3     | 0.0355 | 1.0853 |
| 11086 | D07 | 7857  | 6769   | STAC      | 0.0356 | 1.0854 |
| 11066 | F07 | 7011  | 80254  | CEP63     | 0.0356 | 1.0854 |
| 11017 | E08 | 6226  | 1469   | CST1      | 0.0356 | 1.0854 |
| 31008 | G06 | 11367 | 23201  | FAM168A   | 0.0356 | 1.0854 |
| 11065 | B08 | 2903  | 115557 | GEFT      | 0.0356 | 1.0855 |
| 11060 | G07 | 6802  | 3884   | KRT33B    | 0.0356 | 1.0855 |
| 31005 | A02 | 10860 | 54097  | FAM3B     | 0.0356 | 1.0855 |
| 51008 | B08 | 55162 | 55835  | CENPJ     | 0.0356 | 1.0855 |
| 11007 | G06 | 7261  | 10385  | BTN2A2    | 0.0356 | 1.0855 |
| 11074 | A01 | 4849  | 53938  | PPIL3     | 0.0357 | 1.0856 |
| 11052 | B09 | 4134  | 23587  | C17orf81  | 0.0357 | 1.0857 |
| 11030 | H04 | 6076  | 29916  | SNX11     | 0.0357 | 1.0857 |
| 11070 | G07 | 7863  | 81788  | NUAK2     | 0.0357 | 1.0857 |
| 11069 | G02 | 7138  | 8324   | FZD7      | 0.0357 | 1.0857 |
| 11039 | A05 | 2587  | 113878 | DTX2      | 0.0357 | 1.0858 |
| 11013 | E05 | 4655  | 6734   | SRPR      | 0.0357 | 1.0858 |
| 11063 | G10 | 9849  | 2563   | GABRD     | 0.0358 | 1.0859 |
| 31005 | A04 | 11260 | 51535  | PPHLN1    | 0.0358 | 1.0859 |
| 31022 | F10 | 13326 | 153527 | ZMAT2     | 0.0358 | 1.0859 |
| 11008 | B03 | 3893  | 11344  | TWF2      | 0.0358 | 1.0859 |

|       |     |       |        |           |        |        |
|-------|-----|-------|--------|-----------|--------|--------|
| 11025 | E02 | 4975  | 64783  | RBM15     | 0.0358 | 1.0860 |
| 11077 | E07 | 3749  | 5859   | QARS      | 0.0358 | 1.0860 |
| 51033 | D05 | 53407 | 4946   | OAZ1      | 0.0359 | 1.0861 |
| 51035 | D07 | 54744 | 2651   | GCNT2     | 0.0359 | 1.0861 |
| 11027 | H01 | 5366  | 25901  | CCDC28A   | 0.0359 | 1.0862 |
| 51002 | G05 | 52594 | 285525 | YIPF7     | 0.0359 | 1.0862 |
| 11040 | D11 | 5490  | 10793  | ZNF273    | 0.0359 | 1.0862 |
| 51032 | G03 | 55696 | 6209   | RPS15     | 0.0360 | 1.0863 |
| 11066 | B09 | 7884  | 26010  | SPATS2L   | 0.0360 | 1.0863 |
| 11013 | F08 | 4925  | 8829   | NRP1      | 0.0360 | 1.0863 |
| 11057 | G08 | 100   | 23582  | CCNDBP1   | 0.0360 | 1.0864 |
| 51020 | H02 | 56772 | 151258 | SLC38A11  | 0.0360 | 1.0864 |
| 11041 | C02 | 5805  | 9616   | RNF7      | 0.0360 | 1.0864 |
| 11063 | G06 | 2456  | 55118  | CRTAC1    | 0.0360 | 1.0865 |
| 11035 | H01 | 6149  | 81671  | TMEM49    | 0.0360 | 1.0865 |
| 11015 | A05 | 9041  | 54921  | CHTF8     | 0.0360 | 1.0865 |
| 31043 | D03 | 7882  | 5292   | PIM1      | 0.0361 | 1.0866 |
| 11056 | H07 | 4224  | 80345  | ZSCAN16   | 0.0361 | 1.0866 |
| 11087 | F09 | 5222  | 79892  | C10orf119 | 0.0361 | 1.0867 |
| 11065 | E11 | 9331  | 158067 | C9orf98   | 0.0361 | 1.0868 |
| 11016 | B08 | 5589  | 336    | APOA2     | 0.0362 | 1.0868 |
| 51011 | H09 | 54886 | 1103   | CHAT      | 0.0362 | 1.0869 |
| 31039 | H03 | 417   | 63827  | BCAN      | 0.0362 | 1.0869 |
| 11046 | D02 | 1042  | 54826  | GIN1      | 0.0362 | 1.0870 |
| 31023 | B05 | 13479 | 80199  | FUZ       | 0.0362 | 1.0870 |
| 11047 | D05 | 3880  | 6188   | RPS3      | 0.0362 | 1.0870 |
| 11050 | D12 | 1487  | 79949  | C10orf81  | 0.0363 | 1.0871 |
| 51024 | H03 | 55168 | 9758   | FRMPD4    | 0.0363 | 1.0872 |
| 11077 | B11 | 4043  | 56997  | CABC1     | 0.0363 | 1.0872 |
| 11061 | D12 | 2720  | 4013   | VWA5A     | 0.0363 | 1.0873 |
| 11050 | C04 | 700   | 10456  | HAX1      | 0.0364 | 1.0873 |
| 11041 | E12 | 1007  | 152015 | ROPN1B    | 0.0364 | 1.0874 |
| 31029 | F02 | 14261 | 27327  | TNRC6A    | 0.0364 | 1.0875 |
| 31006 | F04 | 10818 | 285203 | C3orf64   | 0.0364 | 1.0875 |
| 11017 | D11 | 3793  | 55969  | C20orf24  | 0.0364 | 1.0875 |
| 31011 | H06 | 12185 | 4696   | NDUFA3    | 0.0365 | 1.0876 |
| 11016 | C10 | 5540  | 5620   | PRM2      | 0.0365 | 1.0876 |
| 11062 | A05 | 8192  | 93183  | PIGM      | 0.0365 | 1.0876 |
| 51030 | C12 | 55554 | 1854   | DUT       | 0.0365 | 1.0876 |
| 11034 | A11 | 6299  | 9447   | AIM2      | 0.0365 | 1.0876 |
| 11001 | E08 | 196   | 155066 | ATP6V0E2  | 0.0365 | 1.0877 |
| 11057 | E09 | 7180  | 56256  | SERTAD4   | 0.0365 | 1.0877 |
| 31023 | B10 | 13510 | 254427 | C10orf47  | 0.0365 | 1.0877 |
| 11026 | E11 | 3164  | 2029   | ENSA      | 0.0365 | 1.0877 |

|       |     |       |        |            |        |        |
|-------|-----|-------|--------|------------|--------|--------|
| 51001 | G11 | 54618 | 389084 | C2orf82    | 0.0365 | 1.0877 |
| 11072 | D10 | 490   | 64218  | SEMA4A     | 0.0366 | 1.0878 |
| 31006 | F07 | 10857 | 255877 | BCL6B      | 0.0366 | 1.0878 |
| 11059 | C07 | 9818  | 6439   | SFTPB      | 0.0366 | 1.0879 |
| 31021 | A10 | 12923 | 5897   | RAG2       | 0.0366 | 1.0879 |
| 11050 | D08 | 1865  | 131408 | FAM131A    | 0.0366 | 1.0880 |
| 51014 | G04 | 52785 | 124590 | USH1G      | 0.0366 | 1.0880 |
| 11074 | E09 | 8661  | 147906 | DACT3      | 0.0366 | 1.0880 |
| 11055 | G04 | 5473  | 10539  | GLRX3      | 0.0367 | 1.0882 |
| 31018 | E03 | 13303 | 54741  | LEPROT     | 0.0367 | 1.0882 |
| 31043 | E04 | 6691  | 64748  | LPPR2      | 0.0367 | 1.0882 |
| 31003 | C12 | 10470 | 339327 | ZNF546     | 0.0367 | 1.0882 |
| 51024 | E04 | 56295 | 284434 | NWD1       | 0.0367 | 1.0882 |
| 11086 | H10 | 6026  | 11133  | KPTN       | 0.0367 | 1.0882 |
| 51002 | E03 | 52654 | 2995   | GYPC       | 0.0367 | 1.0883 |
| 11081 | C03 | 7503  | 9168   | TMSB10     | 0.0368 | 1.0884 |
| 31001 | B02 | 10295 | 3512   | IGJ        | 0.0368 | 1.0884 |
| 31032 | H09 | 14744 | 284    | ANGPT1     | 0.0368 | 1.0885 |
| 31014 | C07 | 12157 | 525    | ATP6V1B1   | 0.0368 | 1.0885 |
| 11053 | G08 | 2941  | 94039  | ZNF101     | 0.0368 | 1.0885 |
| 31042 | D03 | 5493  | 51136  | RNFT1      | 0.0368 | 1.0885 |
| 31039 | F02 | 9274  | 84077  | C3orf20    | 0.0368 | 1.0885 |
| 11064 | H01 | 379   | 55325  | UFSP2      | 0.0368 | 1.0885 |
| 11065 | H10 | 5342  | 79792  | GSDMD      | 0.0369 | 1.0886 |
| 31007 | A06 | 11223 | 57691  | KIAA1586   | 0.0369 | 1.0886 |
| 31037 | D03 | 12497 | 11100  | HNRNPUL1   | 0.0369 | 1.0887 |
| 11030 | F10 | 3631  | 5714   | PSMD8      | 0.0369 | 1.0887 |
| 31036 | C01 | 10828 | 644316 | FLJ43315   | 0.0369 | 1.0888 |
| 31024 | A05 | 13717 | 137964 | AGPAT6     | 0.0369 | 1.0888 |
| 11044 | E01 | 2919  | 2739   | GLO1       | 0.0370 | 1.0889 |
| 11009 | F09 | 5079  | 8703   | B4GALT3    | 0.0370 | 1.0890 |
| 51032 | G11 | 55612 | 145978 | NCRNA00052 | 0.0370 | 1.0890 |
| 51034 | B12 | 54603 | 170392 | OIT3       | 0.0370 | 1.0890 |
| 51031 | C11 | 55435 | 55425  | KIAA1704   | 0.0371 | 1.0891 |
| 11089 | F03 | 13    | 56996  | SLC12A9    | 0.0371 | 1.0891 |
| 31008 | D12 | 11717 | 10739  | RFPL2      | 0.0371 | 1.0892 |
| 11037 | G03 | 7447  | 1198   | CLK3       | 0.0371 | 1.0892 |
| 11013 | F12 | 7856  | 55684  | C9orf86    | 0.0371 | 1.0892 |
| 31005 | F06 | 11000 | 84193  | SETD3      | 0.0371 | 1.0893 |
| 31041 | G04 | 5950  | 4190   | MDH1       | 0.0372 | 1.0893 |
| 11037 | C02 | 7951  | 1650   | DDOST      | 0.0372 | 1.0894 |
| 31004 | C02 | 10437 | 5896   | RAG1       | 0.0372 | 1.0894 |
| 11002 | G08 | 5678  | 6392   | SDHD       | 0.0372 | 1.0895 |
| 31026 | B09 | 13795 | 4222   | MEOX1      | 0.0372 | 1.0895 |

|       |     |       |        |           |        |        |
|-------|-----|-------|--------|-----------|--------|--------|
| 51004 | G05 | 56131 | 8625   | RFXANK    | 0.0373 | 1.0896 |
| 11017 | G02 | 6368  | 199    | AIF1      | 0.0373 | 1.0896 |
| 11085 | E03 | 9773  | 64430  | C14orf135 | 0.0373 | 1.0896 |
| 51027 | C11 | 55502 | 5236   | PGM1      | 0.0373 | 1.0896 |
| 11008 | E08 | 3634  | 81029  | WNT5B     | 0.0373 | 1.0896 |
| 11061 | E06 | 2801  | 9051   | PSTPIP1   | 0.0373 | 1.0897 |
| 11035 | H05 | 1026  | 652    | BMP4      | 0.0373 | 1.0897 |
| 51024 | A05 | 55208 | 57529  | RGAG1     | 0.0373 | 1.0897 |
| 11026 | A03 | 8809  | 7639   | ZNF85     | 0.0373 | 1.0897 |
| 51008 | H02 | 53867 | 5290   | PIK3CA    | 0.0373 | 1.0898 |
| 11086 | E10 | 2584  | 7020   | TFAP2A    | 0.0373 | 1.0898 |
| 11026 | C02 | 9793  | 4731   | NDUFV3    | 0.0374 | 1.0899 |
| 31012 | B12 | 12171 | 1506   | CTRL      | 0.0374 | 1.0899 |
| 11063 | F10 | 8574  | 29761  | USP25     | 0.0374 | 1.0899 |
| 51020 | H11 | 56363 | 121278 | TPH2      | 0.0374 | 1.0900 |
| 11034 | G09 | 1409  | 139741 | ACTRT1    | 0.0374 | 1.0900 |
| 31033 | G09 | 14934 | 64581  | CLEC7A    | 0.0375 | 1.0901 |
| 31027 | G09 | 14158 | 51699  | VPS29     | 0.0375 | 1.0901 |
| 11003 | D09 | 6189  | 2760   | GM2A      | 0.0375 | 1.0901 |
| 51008 | H09 | 56073 | 577    | BAI3      | 0.0375 | 1.0901 |
| 31023 | A06 | 13509 | 8558   | CDK10     | 0.0375 | 1.0902 |
| 11040 | C06 | 8726  | 92912  | UBE2Q2    | 0.0375 | 1.0902 |
| 31016 | B02 | 12543 | 126526 | C19orf47  | 0.0375 | 1.0902 |
| 11064 | E10 | 10194 | 89870  | TRIM15    | 0.0375 | 1.0902 |
| 11075 | F11 | 5795  | 10944  | C11orf58  | 0.0375 | 1.0903 |
| 11022 | G08 | 3122  | 5226   | PGD       | 0.0375 | 1.0903 |
| 51008 | D05 | 54816 | 4437   | MSH3      | 0.0375 | 1.0903 |
| 11070 | G03 | 6676  | 27037  | TRMT2A    | 0.0375 | 1.0903 |
| 51009 | G08 | 53047 | 51593  | SRRT      | 0.0376 | 1.0903 |
| 31006 | B11 | 11010 | 2713   | GK3P      | 0.0376 | 1.0904 |
| 11068 | H05 | 9546  | 55530  | SVOP      | 0.0376 | 1.0904 |
| 11062 | F07 | 2792  | 64093  | SMOC1     | 0.0376 | 1.0904 |
| 51006 | C10 | 56844 | 56907  | SPIRE1    | 0.0376 | 1.0905 |
| 31021 | C12 | 13346 | 83657  | DYNLRB2   | 0.0376 | 1.0905 |
| 11058 | D01 | 8468  | 23219  | FBXO28    | 0.0376 | 1.0905 |
| 11026 | H01 | 4594  | 79033  | ERI3      | 0.0376 | 1.0906 |
| 11007 | C09 | 1656  | 57019  | CIAPIN1   | 0.0376 | 1.0906 |
| 51029 | A09 | 56678 | 3766   | KCNJ10    | 0.0377 | 1.0906 |
| 11058 | E06 | 8287  | 83879  | CDCA7     | 0.0377 | 1.0906 |
| 11040 | H01 | 5198  | 56943  | ENY2      | 0.0377 | 1.0907 |
| 51017 | B11 | 55766 | 10016  | PDCD6     | 0.0377 | 1.0907 |
| 11032 | G05 | 1216  | 83693  | HSDL1     | 0.0377 | 1.0907 |
| 51002 | C10 | 54810 | 138307 | LCN8      | 0.0377 | 1.0908 |
| 11057 | F08 | 10202 | NA     | NA        | 0.0377 | 1.0908 |



|       |     |       |        |            |        |        |
|-------|-----|-------|--------|------------|--------|--------|
| 11055 | C05 | 112   | 8574   | AKR7A2     | 0.0377 | 1.0908 |
| 31043 | A06 | 6699  | 1457   | CSNK2A1    | 0.0378 | 1.0908 |
| 31017 | B06 | 12652 | 53335  | BCL11A     | 0.0378 | 1.0908 |
| 51032 | D10 | 55399 | 29797  | POM121L8P  | 0.0378 | 1.0908 |
| 31045 | F05 | 9405  | 440173 | LOC440173  | 0.0378 | 1.0909 |
| 31040 | G08 | 8419  | 9034   | CCRL2      | 0.0378 | 1.0909 |
| 51020 | D12 | 56621 | 56242  | ZNF253     | 0.0378 | 1.0909 |
| 11066 | A01 | 9550  | 60680  | CELF5      | 0.0378 | 1.0909 |
| 11007 | B12 | 8876  | 825    | CAPN3      | 0.0378 | 1.0909 |
| 11056 | D05 | 8382  | 10663  | CXCR6      | 0.0378 | 1.0910 |
| 31018 | H04 | 13144 | 3641   | INSL4      | 0.0378 | 1.0910 |
| 31041 | A02 | 7694  | 147807 | ZNF524     | 0.0378 | 1.0910 |
| 11060 | B05 | 6585  | 51808  | PHAX       | 0.0378 | 1.0910 |
| 11081 | G11 | 6408  | 51124  | IER3IP1    | 0.0378 | 1.0910 |
| 51030 | H02 | 56753 | 913    | CD1E       | 0.0378 | 1.0910 |
| 11015 | B06 | 7384  | NA     | NA         | 0.0379 | 1.0911 |
| 11082 | F11 | 3695  | 8337   | HIST2H2AA3 | 0.0379 | 1.0911 |
| 11069 | F04 | 8167  | 8195   | MKKS       | 0.0379 | 1.0911 |
| 11018 | F03 | 6976  | 80306  | MED28      | 0.0379 | 1.0911 |
| 51002 | C09 | 52791 | 153684 | LOC153684  | 0.0379 | 1.0911 |
| 11001 | H01 | 3075  | 93974  | ATPIF1     | 0.0379 | 1.0912 |
| 31004 | C03 | 10424 | 55345  | C4orf21    | 0.0379 | 1.0912 |
| 11082 | E06 | 2366  | 151477 | C2orf52    | 0.0379 | 1.0912 |
| 11069 | F06 | 9787  | 10133  | OPTN       | 0.0379 | 1.0912 |
| 11068 | E04 | 296   | 9070   | ASH2L      | 0.0379 | 1.0913 |
| 51003 | H06 | 52889 | 338809 | C12orf74   | 0.0379 | 1.0913 |
| 51014 | F10 | 52734 | 192134 | B3GNT6     | 0.0379 | 1.0913 |
| 31008 | F10 | 11587 | 51256  | TBC1D7     | 0.0380 | 1.0913 |
| 31014 | E03 | 11972 | 2002   | ELK1       | 0.0380 | 1.0914 |
| 31006 | G09 | 10919 | 84928  | TMEM209    | 0.0380 | 1.0914 |
| 11071 | G09 | 7205  | 2632   | GBE1       | 0.0380 | 1.0914 |
| 51031 | C02 | 55474 | 3514   | IGKC       | 0.0380 | 1.0914 |
| 11076 | C01 | 5698  | 5744   | PTHLH      | 0.0380 | 1.0914 |
| 11067 | G02 | 6722  | 6602   | SMARCD1    | 0.0380 | 1.0915 |
| 51024 | H11 | 53207 | 114788 | CSMD3      | 0.0380 | 1.0915 |
| 51012 | F08 | 52793 | 342908 | ZNF404     | 0.0380 | 1.0915 |
| 11015 | H08 | 3200  | 25994  | HIGD1A     | 0.0380 | 1.0916 |
| 11073 | G09 | 2585  | 6207   | RPS13      | 0.0381 | 1.0916 |
| 11027 | H02 | 6774  | 11145  | PLA2G16    | 0.0381 | 1.0916 |
| 51021 | C11 | 56808 | 3656   | IRAK2      | 0.0381 | 1.0916 |
| 11078 | B06 | 5402  | 80179  | MYO19      | 0.0381 | 1.0917 |
| 11017 | D03 | 6715  | 81572  | PDRG1      | 0.0381 | 1.0917 |
| 51017 | B05 | 55758 | 3596   | IL13       | 0.0381 | 1.0917 |
| 11022 | B10 | 7357  | 9404   | LPXN       | 0.0381 | 1.0918 |

|       |     |       |        |            |        |        |
|-------|-----|-------|--------|------------|--------|--------|
| 51009 | B08 | 53122 | 222256 | CDHR3      | 0.0381 | 1.0918 |
| 11011 | G09 | 3693  | 7284   | TUFM       | 0.0382 | 1.0918 |
| 11007 | H10 | 7479  | 7517   | XRCC3      | 0.0382 | 1.0919 |
| 11028 | D09 | 2200  | 148423 | C1orf52    | 0.0382 | 1.0919 |
| 11025 | A12 | 1474  | 8495   | PPFIBP2    | 0.0382 | 1.0919 |
| 31028 | G02 | 14102 | 57642  | COL20A1    | 0.0382 | 1.0920 |
| 51023 | C03 | 55883 | 8549   | LGR5       | 0.0382 | 1.0920 |
| 11060 | H06 | 4435  | 6015   | RING1      | 0.0382 | 1.0920 |
| 11056 | D07 | 1844  | 3226   | HOXC10     | 0.0382 | 1.0920 |
| 11063 | F03 | 5140  | 5607   | MAP2K5     | 0.0383 | 1.0921 |
| 11030 | E01 | 10064 | 80333  | KCNIP4     | 0.0383 | 1.0921 |
| 51025 | F12 | 53306 | 23264  | ZC3H7B     | 0.0383 | 1.0922 |
| 11068 | D06 | 563   | 57568  | SIPA1L2    | 0.0383 | 1.0922 |
| 51026 | A02 | 53395 | 5514   | PPP1R10    | 0.0383 | 1.0922 |
| 11041 | G06 | 6481  | 8347   | HIST1H2BC  | 0.0383 | 1.0922 |
| 11018 | G05 | 7249  | 64841  | GNPNAT1    | 0.0383 | 1.0922 |
| 11080 | A02 | 4959  | 22     | ABCB7      | 0.0383 | 1.0922 |
| 31024 | C12 | 13630 | 116447 | TOP1MT     | 0.0383 | 1.0922 |
| 11046 | C10 | 3827  | 10775  | POP4       | 0.0383 | 1.0923 |
| 11008 | E10 | 412   | 57447  | NDRG2      | 0.0384 | 1.0923 |
| 31029 | D09 | 14273 | 10252  | SPRY1      | 0.0384 | 1.0924 |
| 51016 | B10 | 55759 | 5741   | PTH        | 0.0384 | 1.0924 |
| 11058 | E09 | 2512  | 85300  | ATCAY      | 0.0384 | 1.0925 |
| 11006 | H01 | 4624  | 23555  | TSPAN15    | 0.0384 | 1.0925 |
| 31011 | G07 | 12053 | 147804 | LOC147804  | 0.0384 | 1.0925 |
| 11077 | H09 | 2390  | 5358   | PLS3       | 0.0384 | 1.0925 |
| 11054 | F01 | 5564  | 902    | CCNH       | 0.0385 | 1.0927 |
| 11039 | C12 | 7322  | 2990   | GUSB       | 0.0385 | 1.0927 |
| 11026 | G08 | 3343  | 51247  | PAIP2      | 0.0385 | 1.0928 |
| 11037 | C05 | 8858  | 5979   | RET        | 0.0386 | 1.0928 |
| 11037 | E11 | 4001  | 27238  | GPKOW      | 0.0386 | 1.0929 |
| 31032 | D08 | 14816 | 60592  | SCOC       | 0.0386 | 1.0929 |
| 11001 | C10 | 531   | 1831   | TSC22D3    | 0.0386 | 1.0929 |
| 11028 | G08 | 1313  | 399818 | METTL10    | 0.0386 | 1.0929 |
| 51008 | C09 | 55130 | 79443  | FYCO1      | 0.0386 | 1.0929 |
| 51011 | A09 | 54752 | 387357 | THEMIS     | 0.0386 | 1.0930 |
| 51018 | D10 | 56518 | 386680 | KRTAP10-5  | 0.0387 | 1.0931 |
| 31018 | B11 | 13160 | 150684 | COMMD1     | 0.0387 | 1.0931 |
| 11013 | H02 | 8196  | 3312   | HSPA8      | 0.0387 | 1.0933 |
| 11044 | C11 | 7272  | 11163  | NUDT4      | 0.0387 | 1.0933 |
| 11044 | C05 | 439   | 727800 | RNF208     | 0.0388 | 1.0933 |
| 51023 | E06 | 55887 | 2895   | GRID2      | 0.0388 | 1.0934 |
| 51002 | F04 | 52563 | 8337   | HIST2H2AA3 | 0.0388 | 1.0934 |
| 51026 | B07 | 53223 | 84129  | ACAD11     | 0.0388 | 1.0935 |

|       |     |       |        |          |        |        |
|-------|-----|-------|--------|----------|--------|--------|
| 11002 | A01 | 542   | 6165   | RPL35A   | 0.0388 | 1.0936 |
| 11018 | G01 | 7276  | 5912   | RAP2B    | 0.0389 | 1.0936 |
| 11066 | D01 | 5028  | 55323  | LARP6    | 0.0389 | 1.0937 |
| 11087 | C05 | 6625  | 9825   | SPATA2   | 0.0389 | 1.0937 |
| 11074 | H11 | 1857  | 84100  | ARL6     | 0.0389 | 1.0938 |
| 11061 | G10 | 4634  | 617    | BCS1L    | 0.0389 | 1.0938 |
| 51025 | D08 | 56856 | 374868 | ATP9B    | 0.0389 | 1.0938 |
| 11058 | A04 | 3863  | 54930  | HAUS4    | 0.0389 | 1.0938 |
| 51021 | B10 | 56625 | 84342  | COG8     | 0.0390 | 1.0939 |
| 11067 | H10 | 7750  | 8685   | MARCO    | 0.0390 | 1.0939 |
| 11005 | E10 | 335   | 83638  | C11orf68 | 0.0390 | 1.0939 |
| 51025 | F10 | 56854 | 1806   | DPYD     | 0.0390 | 1.0939 |
| 31001 | F06 | 10663 | 25898  | RCHY1    | 0.0390 | 1.0939 |
| 31044 | G02 | 5168  | 92092  | ZC3HAV1L | 0.0390 | 1.0939 |
| 51022 | F10 | 56190 | 3978   | LIG1     | 0.0390 | 1.0940 |
| 51018 | E11 | 56134 | 284451 | ODF3L2   | 0.0391 | 1.0941 |
| 31030 | E11 | 14429 | 780    | DDR1     | 0.0391 | 1.0942 |
| 11052 | F06 | 2428  | 3227   | HOXC11   | 0.0391 | 1.0943 |
| 51034 | B06 | 53457 | 284486 | THEM5    | 0.0391 | 1.0943 |
| 11027 | D08 | 5382  | 11237  | RNF24    | 0.0391 | 1.0943 |
| 11039 | D04 | 1455  | 6732   | SRPK1    | 0.0392 | 1.0943 |
| 11050 | A07 | 1017  | 26747  | NUFIP1   | 0.0392 | 1.0943 |
| 11089 | D02 | 1011  | 4899   | NRF1     | 0.0392 | 1.0944 |
| 11050 | C03 | 7501  | 10456  | HAX1     | 0.0392 | 1.0944 |
| 11050 | E09 | 1128  | 57471  | ERMN     | 0.0392 | 1.0945 |
| 11048 | E08 | 4429  | 79363  | C1orf89  | 0.0392 | 1.0945 |
| 11056 | F11 | 2741  | 301    | ANXA1    | 0.0392 | 1.0945 |
| 11059 | C02 | 9954  | 2813   | GP2      | 0.0392 | 1.0945 |
| 51025 | F11 | 53312 | 219736 | STOX1    | 0.0392 | 1.0945 |
| 31042 | C11 | 5299  | 9546   | APBA3    | 0.0392 | 1.0945 |
| 51025 | E06 | 56893 | 79158  | GNPTAB   | 0.0392 | 1.0945 |
| 11002 | E01 | 10147 | 1845   | DUSP3    | 0.0392 | 1.0946 |
| 31022 | F12 | 13456 | 92002  | FAM58A   | 0.0393 | 1.0946 |
| 11081 | B06 | 8005  | 1043   | CD52     | 0.0393 | 1.0946 |
| 11010 | F09 | 7457  | 26136  | TES      | 0.0393 | 1.0947 |
| 51034 | B10 | 53582 | 89765  | RSPH1    | 0.0393 | 1.0947 |
| 51013 | H01 | 54054 | 148266 | ZNF569   | 0.0393 | 1.0948 |
| 11056 | H05 | 7196  | 91603  | ZNF830   | 0.0393 | 1.0948 |
| 31028 | A08 | 14160 | 84163  | GTF2IRD2 | 0.0393 | 1.0948 |
| 51025 | G03 | 53302 | 394    | ARHGAP5  | 0.0394 | 1.0949 |
| 31018 | C02 | 13129 | 29802  | VPREB3   | 0.0394 | 1.0949 |
| 11002 | G10 | 8296  | 22977  | AKR7A3   | 0.0394 | 1.0949 |
| 11052 | H01 | 2246  | 23554  | TSPAN12  | 0.0394 | 1.0950 |
| 31041 | G02 | 6161  | 126433 | FBXO27   | 0.0394 | 1.0950 |

|       |     |       |        |           |        |        |
|-------|-----|-------|--------|-----------|--------|--------|
| 51001 | D12 | 54756 | 147920 | IGFL2     | 0.0394 | 1.0951 |
| 51009 | G07 | 53051 | 221061 | FAM171A1  | 0.0395 | 1.0951 |
| 51015 | H11 | 53089 | 23495  | TNFRSF13B | 0.0395 | 1.0952 |
| 51003 | H03 | 53477 | 84931  | LOC84931  | 0.0395 | 1.0952 |
| 51002 | E01 | 54950 | 2647   | BLOC1S1   | 0.0395 | 1.0952 |
| 51001 | C05 | 52649 | 84651  | SPINK7    | 0.0395 | 1.0953 |
| 51012 | B02 | 52991 | 345895 | RSPH4A    | 0.0395 | 1.0953 |
| 11039 | F04 | 6638  | 64794  | DDX31     | 0.0395 | 1.0953 |
| 11073 | D03 | 4077  | 6635   | SNRPE     | 0.0395 | 1.0953 |
| 51004 | D04 | 54280 | 4803   | NGF       | 0.0395 | 1.0953 |
| 11026 | B07 | 9576  | 57573  | ZNF471    | 0.0395 | 1.0953 |
| 11001 | C04 | 8594  | 55585  | UBE2Q1    | 0.0395 | 1.0953 |
| 51031 | F06 | 55413 | 5064   | PALM      | 0.0396 | 1.0953 |
| 11064 | B10 | 4234  | 8882   | ZNF259    | 0.0396 | 1.0954 |
| 31005 | G11 | 10876 | 23126  | POGZ      | 0.0396 | 1.0954 |
| 51034 | H03 | 55040 | 154288 | C6orf221  | 0.0396 | 1.0955 |
| 11019 | D04 | 7055  | 55319  | C4orf43   | 0.0396 | 1.0955 |
| 11035 | B06 | 1326  | 4179   | CD46      | 0.0396 | 1.0955 |
| 11054 | C09 | 3879  | 308    | ANXA5     | 0.0396 | 1.0955 |
| 51010 | D04 | 54286 | 54431  | DNAJC10   | 0.0396 | 1.0956 |
| 11025 | B11 | 9830  | 84070  | FAM186B   | 0.0397 | 1.0956 |
| 11089 | G03 | 1037  | 65057  | ACD       | 0.0397 | 1.0956 |
| 11085 | D05 | 3573  | 55151  | TMEM38B   | 0.0397 | 1.0956 |
| 11060 | D08 | 970   | 64121  | RRAGC     | 0.0397 | 1.0957 |
| 51027 | E03 | 55401 | 81626  | C1orf14   | 0.0397 | 1.0957 |
| 11053 | E09 | 3567  | 10783  | NEK6      | 0.0397 | 1.0957 |
| 11044 | H04 | 4874  | 84310  | C7orf50   | 0.0397 | 1.0957 |
| 51035 | F07 | 54275 | 132724 | TMPRSS11B | 0.0397 | 1.0957 |
| 51008 | C12 | 53077 | 6935   | ZEB1      | 0.0397 | 1.0958 |
| 11007 | H05 | 6174  | 29907  | SNX15     | 0.0397 | 1.0958 |
| 11088 | F03 | 5220  | 389    | RHOC      | 0.0397 | 1.0958 |
| 51016 | A03 | 53153 | 389860 | PAGE2B    | 0.0397 | 1.0958 |
| 11075 | E07 | 998   | 22800  | RRAS2     | 0.0398 | 1.0959 |
| 11048 | H03 | 1605  | 135295 | SRSF12    | 0.0398 | 1.0959 |
| 11036 | G10 | 3980  | 2896   | GRN       | 0.0398 | 1.0959 |
| 31006 | B12 | 11238 | 2590   | GALNT2    | 0.0398 | 1.0961 |
| 51017 | F12 | 55962 | 7696   | ZNF137    | 0.0398 | 1.0961 |
| 11010 | F05 | 5641  | 5557   | PRIM1     | 0.0398 | 1.0961 |
| 51014 | E05 | 52836 | 284110 | GSDMA     | 0.0399 | 1.0961 |
| 11048 | D04 | 2232  | 84232  | MAF1      | 0.0399 | 1.0961 |
| 11044 | C12 | 685   | 4601   | MXI1      | 0.0399 | 1.0962 |
| 51027 | G02 | 53320 | 6925   | TCF4      | 0.0399 | 1.0962 |
| 11053 | F02 | 940   | 4111   | MAGEA12   | 0.0399 | 1.0962 |
| 11044 | B02 | 4736  | 6142   | RPL18A    | 0.0399 | 1.0963 |

|       |     |       |        |           |        |        |
|-------|-----|-------|--------|-----------|--------|--------|
| 11014 | A04 | 787   | 55342  | STRBP     | 0.0399 | 1.0963 |
| 51005 | F05 | 53762 | 347853 | TBX10     | 0.0400 | 1.0964 |
| 11050 | E12 | 848   | 55745  | MUDENG    | 0.0400 | 1.0964 |
| 31043 | A10 | 7095  | 55661  | DDX27     | 0.0400 | 1.0965 |
| 11001 | C06 | 2824  | 55795  | PCID2     | 0.0400 | 1.0965 |
| 51035 | D09 | 54668 | 125115 | KRT40     | 0.0400 | 1.0965 |
| 11072 | B04 | 8179  | 57709  | SLC7A14   | 0.0400 | 1.0965 |
| 11002 | B06 | 9944  | 80864  | EGFL8     | 0.0400 | 1.0966 |
| 31006 | F03 | 10844 | 7421   | VDR       | 0.0400 | 1.0966 |
| 11060 | A06 | 7067  | 79175  | ZNF343    | 0.0400 | 1.0966 |
| 11035 | H07 | 6388  | 1974   | EIF4A2    | 0.0401 | 1.0966 |
| 11061 | A03 | 4880  | 56931  | DUS3L     | 0.0401 | 1.0966 |
| 11004 | D09 | 2418  | 51203  | NUSAP1    | 0.0401 | 1.0966 |
| 11053 | D01 | 2651  | 54982  | CLN6      | 0.0401 | 1.0967 |
| 31009 | F11 | 11723 | 705    | BYSL      | 0.0401 | 1.0967 |
| 11044 | H11 | 5173  | 65108  | MARCKSL1  | 0.0401 | 1.0967 |
| 11073 | A03 | 3790  | 9550   | ATP6V1G1  | 0.0401 | 1.0967 |
| 51005 | E05 | 54989 | 9840   | KIAA0748  | 0.0401 | 1.0968 |
| 31040 | B03 | 2042  | 7272   | TTK       | 0.0401 | 1.0968 |
| 11077 | A01 | 3777  | 7052   | TGM2      | 0.0402 | 1.0969 |
| 11027 | E12 | 3004  | 54539  | NDUFB11   | 0.0402 | 1.0969 |
| 11063 | F12 | 4835  | 84975  | MFSD5     | 0.0402 | 1.0969 |
| 31012 | A06 | 12100 | 57381  | RHOJ      | 0.0402 | 1.0970 |
| 31032 | F12 | 14811 | 352999 | C6orf58   | 0.0402 | 1.0970 |
| 11074 | H04 | 2124  | 1068   | CETN1     | 0.0402 | 1.0970 |
| 51001 | G02 | 52614 | 7940   | LST1      | 0.0402 | 1.0970 |
| 31012 | G01 | 12059 | 595101 | LOC595101 | 0.0402 | 1.0970 |
| 11054 | B01 | 2802  | 328    | APEX1     | 0.0402 | 1.0971 |
| 11043 | G07 | 2333  | 10627  | MYL12A    | 0.0403 | 1.0971 |
| 11061 | C06 | 4235  | 655    | BMP7      | 0.0403 | 1.0971 |
| 11083 | C12 | 4611  | 79415  | C17orf62  | 0.0403 | 1.0972 |
| 51024 | A01 | 53599 | 1950   | EGF       | 0.0403 | 1.0972 |
| 31012 | B03 | 12099 | 112812 | FDX1L     | 0.0404 | 1.0974 |
| 11019 | G11 | 7733  | 1443   | CSH2      | 0.0404 | 1.0974 |
| 11062 | F08 | 2197  | 221154 | EFHA1     | 0.0404 | 1.0975 |
| 11068 | B03 | 2867  | 6905   | TBCE      | 0.0404 | 1.0976 |
| 51001 | E03 | 52647 | 255061 | TAC4      | 0.0404 | 1.0976 |
| 51030 | F03 | 55514 | 2135   | EXTL2     | 0.0404 | 1.0976 |
| 11006 | H02 | 4805  | 56910  | STARD7    | 0.0404 | 1.0976 |
| 11043 | D02 | 757   | 8724   | SNX3      | 0.0405 | 1.0976 |
| 11013 | H08 | 484   | 27242  | TNFRSF21  | 0.0405 | 1.0976 |
| 51012 | C03 | 53099 | 60495  | HPSE2     | 0.0405 | 1.0977 |
| 11014 | G08 | 3005  | 4998   | ORC1L     | 0.0405 | 1.0978 |
| 31018 | F12 | 13012 | 30833  | NT5C      | 0.0405 | 1.0978 |

|       |     |       |        |            |        |        |
|-------|-----|-------|--------|------------|--------|--------|
| 31043 | E06 | 7075  | 115825 | WDFY2      | 0.0405 | 1.0978 |
| 11084 | B04 | 9754  | 55088  | C10orf118  | 0.0405 | 1.0979 |
| 11034 | E08 | 1212  | 83942  | TSSK1B     | 0.0406 | 1.0979 |
| 11064 | B02 | 1270  | 118427 | OLFM3      | 0.0406 | 1.0979 |
| 11012 | E04 | 6183  | 1816   | DRD5       | 0.0406 | 1.0980 |
| 11013 | C01 | 4364  | 5709   | PSMD3      | 0.0406 | 1.0980 |
| 11008 | G10 | 8880  | 55698  | RADIL      | 0.0406 | 1.0980 |
| 11057 | H04 | 4050  | 10073  | SNUPN      | 0.0406 | 1.0980 |
| 11084 | H11 | 1921  | 284680 | C1orf111   | 0.0406 | 1.0980 |
| 11072 | D05 | 5353  | 10989  | IMMT       | 0.0406 | 1.0980 |
| 11018 | F07 | 3385  | 29074  | MRPL18     | 0.0406 | 1.0980 |
| 31014 | A01 | 12305 | 23210  | JMJD6      | 0.0406 | 1.0981 |
| 11047 | H04 | 5929  | 27315  | PGAP2      | 0.0406 | 1.0981 |
| 11014 | G09 | 883   | 10015  | PDCD6IP    | 0.0407 | 1.0982 |
| 11057 | C06 | 7915  | 64236  | PDLIM2     | 0.0407 | 1.0982 |
| 11081 | F06 | 8590  | 3845   | KRAS       | 0.0407 | 1.0982 |
| 11064 | E03 | 9270  | 8900   | CCNA1      | 0.0407 | 1.0983 |
| 51011 | G04 | 55014 | 240    | ALOX5      | 0.0407 | 1.0983 |
| 31037 | B02 | 11901 | 255104 | TMCO4      | 0.0407 | 1.0984 |
| 11077 | D09 | 918   | 28952  | CCDC22     | 0.0408 | 1.0985 |
| 11050 | H02 | 8679  | 220108 | FAM124A    | 0.0408 | 1.0985 |
| 11059 | A04 | 10149 | 10672  | GNA13      | 0.0408 | 1.0986 |
| 11043 | G05 | 6858  | 112483 | SAT2       | 0.0408 | 1.0986 |
| 31014 | A09 | 12121 | 200765 | TIGD1      | 0.0408 | 1.0986 |
| 11045 | D01 | 8425  | 147965 | FAM98C     | 0.0409 | 1.0986 |
| 11062 | B01 | 3045  | 64377  | CHST8      | 0.0409 | 1.0987 |
| 11063 | H08 | 4054  | 51309  | ARMCX1     | 0.0409 | 1.0987 |
| 11078 | A06 | 6217  | 51393  | TRPV2      | 0.0409 | 1.0987 |
| 31015 | C06 | 12676 | 1082   | CGB        | 0.0409 | 1.0987 |
| 51015 | G07 | 52790 | 399512 | SLC25A35   | 0.0409 | 1.0987 |
| 11059 | F10 | 1392  | 5071   | PARK2      | 0.0409 | 1.0987 |
| 11048 | H08 | 677   | 92399  | MRRF       | 0.0409 | 1.0987 |
| 31041 | A08 | 6177  | 10769  | PLK2       | 0.0409 | 1.0987 |
| 11052 | C06 | 4777  | 54470  | ARMCX6     | 0.0409 | 1.0988 |
| 11088 | G04 | 5100  | 79035  | OBFC2B     | 0.0409 | 1.0988 |
| 11058 | F06 | 5117  | 80196  | RNF34      | 0.0409 | 1.0988 |
| 11062 | G01 | 8943  | 10426  | TUBGCP3    | 0.0410 | 1.0989 |
| 51001 | C12 | 52629 | 283932 | NCRNA00095 | 0.0410 | 1.0990 |
| 11058 | H08 | 321   | 56894  | AGPAT3     | 0.0410 | 1.0991 |
| 31016 | A04 | 12552 | 9478   | CABP1      | 0.0411 | 1.0992 |
| 31043 | D09 | 6223  | 2309   | FOXO3      | 0.0411 | 1.0992 |
| 11059 | D08 | 447   | NA     | NA         | 0.0411 | 1.0993 |
| 11048 | E05 | 1836  | 23176  | SEPT8      | 0.0411 | 1.0993 |
| 51003 | A03 | 52824 | 284415 | VSTM1      | 0.0411 | 1.0993 |

|       |     |       |        |           |        |        |
|-------|-----|-------|--------|-----------|--------|--------|
| 11067 | F08 | 2243  | 65975  | STK33     | 0.0411 | 1.0993 |
| 11062 | H02 | 5241  | 84961  | FBXL20    | 0.0411 | 1.0993 |
| 51035 | H05 | 53608 | 220988 | HNRNPA3   | 0.0411 | 1.0994 |
| 11026 | A07 | 2846  | 57523  | NYNRIN    | 0.0412 | 1.0994 |
| 11046 | A05 | 2419  | 25978  | CHMP2B    | 0.0412 | 1.0994 |
| 11026 | B10 | 3571  | 6166   | RPL36AL   | 0.0412 | 1.0994 |
| 11005 | E01 | 8715  | 54757  | FAM20A    | 0.0412 | 1.0994 |
| 51014 | H05 | 53035 | 5702   | PSMC3     | 0.0412 | 1.0994 |
| 11050 | G06 | 3942  | 79446  | WDR25     | 0.0412 | 1.0995 |
| 11007 | C01 | 370   | 79187  | FSD1      | 0.0412 | 1.0995 |
| 11021 | E08 | 5767  | 7416   | VDAC1     | 0.0412 | 1.0995 |
| 11012 | C06 | 6166  | 4312   | MMP1      | 0.0412 | 1.0995 |
| 11060 | F10 | 2306  | 254887 | ZDHHC23   | 0.0412 | 1.0995 |
| 11001 | G03 | 9297  | 8676   | STX11     | 0.0412 | 1.0995 |
| 51025 | D04 | 56222 | 9737   | GPRASP1   | 0.0412 | 1.0995 |
| 51022 | F07 | 56673 | 8438   | RAD54L    | 0.0412 | 1.0995 |
| 31015 | F10 | 12671 | 55647  | RAB20     | 0.0412 | 1.0995 |
| 51023 | E12 | 55904 | 9748   | SLK       | 0.0413 | 1.0997 |
| 11055 | H01 | 5670  | 10635  | RAD51AP1  | 0.0413 | 1.0998 |
| 51001 | F04 | 52619 | 729967 | MORN2     | 0.0413 | 1.0998 |
| 51028 | H02 | 55699 | 9584   | RBM39     | 0.0413 | 1.0998 |
| 31010 | E09 | 11764 | 64419  | MTMR14    | 0.0413 | 1.0998 |
| 31039 | A08 | 734   | 54849  | DEF8      | 0.0413 | 1.0998 |
| 51030 | D07 | 56529 | 386676 | KRTAP10-9 | 0.0413 | 1.0998 |
| 11034 | A03 | 7554  | 5771   | PTPN2     | 0.0413 | 1.0999 |
| 11019 | F10 | 6403  | 7763   | ZFAND5    | 0.0413 | 1.0999 |
| 31028 | A10 | 14112 | 222698 | NKAPL     | 0.0413 | 1.0999 |
| 51030 | G09 | 55619 | 199745 | THAP8     | 0.0413 | 1.0999 |
| 31001 | E12 | 10307 | 10766  | TOB2      | 0.0413 | 1.0999 |
| 11060 | F02 | 8443  | 6404   | SELPLG    | 0.0414 | 1.0999 |
| 11018 | G08 | 7933  | 402    | ARL2      | 0.0414 | 1.0999 |
| 11013 | C11 | 6940  | 10922  | FASTK     | 0.0414 | 1.1000 |
| 11043 | A09 | 8488  | 157927 | C9orf62   | 0.0414 | 1.1000 |
| 11070 | A12 | 9603  | 64410  | KLHL25    | 0.0414 | 1.1001 |
| 11021 | C03 | 4938  | 1134   | CHRNA1    | 0.0414 | 1.1001 |
| 11017 | E11 | 4055  | 51299  | NRN1      | 0.0415 | 1.1002 |
| 11022 | D05 | 7752  | 1974   | EIF4A2    | 0.0415 | 1.1002 |
| 11085 | B08 | 5286  | 84330  | ZNF414    | 0.0415 | 1.1002 |
| 11040 | F09 | 5065  | 84281  | C2orf88   | 0.0415 | 1.1002 |
| 11016 | G07 | 3128  | 6633   | SNRPD2    | 0.0415 | 1.1002 |
| 11076 | F01 | 5663  | 1069   | CETN2     | 0.0415 | 1.1003 |
| 51001 | A10 | 55077 | 84657  | C3orf42   | 0.0415 | 1.1003 |
| 11046 | D07 | 4377  | 9045   | RPL14     | 0.0415 | 1.1004 |
| 11036 | B04 | 4676  | 5176   | SERPINF1  | 0.0416 | 1.1004 |

|       |     |       |        |          |        |        |
|-------|-----|-------|--------|----------|--------|--------|
| 11077 | F04 | 977   | 54986  | ULK4     | 0.0416 | 1.1004 |
| 11088 | H04 | 5775  | 84301  | DDI2     | 0.0416 | 1.1005 |
| 31006 | D05 | 10809 | 55065  | GPR172B  | 0.0416 | 1.1005 |
| 31027 | C06 | 14018 | 92     | ACVR2A   | 0.0416 | 1.1005 |
| 51028 | E04 | 56938 | 146439 | CCDC64B  | 0.0416 | 1.1005 |
| 11010 | A03 | 387   | 6948   | TCN2     | 0.0416 | 1.1006 |
| 11068 | C09 | 516   | 54575  | UGT1A10  | 0.0416 | 1.1006 |
| 11015 | G11 | 5772  | 8815   | BANF1    | 0.0416 | 1.1006 |
| 11053 | D11 | 2046  | 6511   | SLC1A6   | 0.0417 | 1.1007 |
| 11048 | F04 | 2630  | 80006  | C5orf44  | 0.0417 | 1.1008 |
| 31001 | B11 | 10301 | 10003  | NAALAD2  | 0.0417 | 1.1008 |
| 11075 | A09 | 4030  | 26151  | NAT9     | 0.0417 | 1.1008 |
| 31040 | B07 | 8484  | 6781   | STC1     | 0.0417 | 1.1009 |
| 51001 | G09 | 52651 | 285150 | FLJ33534 | 0.0418 | 1.1010 |
| 11021 | A08 | 5919  | 25805  | BAMBI    | 0.0418 | 1.1010 |
| 11061 | A09 | 5223  | 64429  | ZDHC6    | 0.0418 | 1.1010 |
| 11051 | D10 | 1982  | 55211  | DPPA4    | 0.0418 | 1.1010 |
| 11019 | E04 | 6756  | 51560  | RAB6B    | 0.0418 | 1.1011 |
| 11003 | H08 | 9419  | 283748 | PLA2G4D  | 0.0418 | 1.1011 |
| 51018 | F06 | 56130 | 139886 | SPIN4    | 0.0418 | 1.1011 |
| 51008 | D06 | 55903 | 3684   | ITGAM    | 0.0418 | 1.1012 |
| 51024 | G07 | 54107 | 55811  | ADCY10   | 0.0418 | 1.1012 |
| 31040 | G06 | 10195 | 144110 | TMEM86A  | 0.0419 | 1.1012 |
| 51021 | B03 | 55866 | 696    | BTN1A1   | 0.0419 | 1.1012 |
| 11003 | E02 | 5188  | 8562   | DENR     | 0.0419 | 1.1012 |
| 31008 | F01 | 11659 | 51537  | MTP18    | 0.0419 | 1.1012 |
| 11001 | F09 | 8619  | 11158  | RABL2B   | 0.0419 | 1.1013 |
| 11080 | F04 | 3798  | 87     | ACTN1    | 0.0419 | 1.1013 |
| 11051 | F11 | 810   | 54149  | C21orf91 | 0.0420 | 1.1015 |
| 11015 | E07 | 9100  | 64411  | ARAP3    | 0.0420 | 1.1015 |
| 11004 | A07 | 6009  | 1211   | CLTA     | 0.0420 | 1.1015 |
| 51023 | B07 | 55895 | 64135  | IFIH1    | 0.0420 | 1.1015 |
| 11053 | F01 | 5072  | 10670  | RRAGA    | 0.0420 | 1.1015 |
| 11065 | E09 | 1515  | 282809 | POC1B    | 0.0420 | 1.1016 |
| 11042 | A01 | 1304  | 8682   | PEA15    | 0.0420 | 1.1016 |
| 11074 | B08 | 3851  | 381    | ARF5     | 0.0420 | 1.1016 |
| 11001 | B12 | 676   | 64778  | FNDC3B   | 0.0420 | 1.1016 |
| 51031 | B06 | 53200 | 3139   | HLA-L    | 0.0420 | 1.1016 |
| 11068 | C10 | 6208  | 54084  | C21orf29 | 0.0421 | 1.1017 |
| 11018 | B07 | 6381  | 54987  | C1orf123 | 0.0421 | 1.1017 |
| 31039 | H08 | 8569  | 84342  | COG8     | 0.0421 | 1.1017 |
| 11067 | B07 | 9283  | 4653   | MYOC     | 0.0421 | 1.1018 |
| 11044 | C02 | 2131  | 754    | PTTG1IP  | 0.0421 | 1.1018 |
| 11010 | F12 | 658   | 5080   | PAX6     | 0.0421 | 1.1018 |



|       |     |       |        |          |        |        |
|-------|-----|-------|--------|----------|--------|--------|
| 11027 | B04 | 8736  | 96764  | TGS1     | 0.0421 | 1.1018 |
| 11079 | F02 | 3372  | 5158   | PDE6B    | 0.0421 | 1.1019 |
| 31025 | A04 | 13605 | 81844  | TRIM56   | 0.0421 | 1.1019 |
| 31023 | G05 | 13430 | 90809  | TMEM55B  | 0.0422 | 1.1019 |
| 11012 | E06 | 6747  | 11269  | DDX19B   | 0.0422 | 1.1020 |
| 11069 | G06 | 6706  | 23302  | WSCD1    | 0.0422 | 1.1020 |
| 51033 | H01 | 55451 | 286527 | TMSB15B  | 0.0422 | 1.1020 |
| 31008 | D03 | 11669 | 51122  | COMMD2   | 0.0422 | 1.1021 |
| 11030 | A03 | 7421  | 3422   | IDI1     | 0.0422 | 1.1021 |
| 11021 | F02 | 3246  | 54952  | TRNAU1AP | 0.0422 | 1.1021 |
| 11077 | F05 | 1155  | 2571   | GAD1     | 0.0423 | 1.1022 |
| 11076 | E06 | 4391  | 55234  | SMU1     | 0.0423 | 1.1022 |
| 11052 | A04 | 3938  | 64771  | C6orf106 | 0.0423 | 1.1023 |
| 51006 | A04 | 54731 | 1386   | ATF2     | 0.0423 | 1.1023 |
| 11075 | G04 | 5791  | 28970  | C11orf54 | 0.0423 | 1.1023 |
| 31005 | C11 | 10925 | 8110   | DPF3     | 0.0423 | 1.1023 |
| 11016 | B02 | 6444  | 55634  | ZNF673   | 0.0423 | 1.1024 |
| 11021 | F03 | 3646  | 9352   | TXNL1    | 0.0423 | 1.1024 |
| 11046 | D03 | 1104  | 11092  | C9orf9   | 0.0423 | 1.1024 |
| 31034 | A07 | 14928 | 116844 | LRG1     | 0.0424 | 1.1024 |
| 31003 | G06 | 10766 | 6340   | SCNN1G   | 0.0424 | 1.1025 |
| 31007 | C03 | 11146 | 375444 | C5orf34  | 0.0424 | 1.1025 |
| 51012 | B04 | 54536 | 8537   | BCAS1    | 0.0424 | 1.1025 |
| 31003 | A09 | 10747 | 10479  | SLC9A6   | 0.0424 | 1.1025 |
| 11064 | F01 | 7377  | 5406   | PNLIP    | 0.0424 | 1.1025 |
| 51032 | H08 | 53141 | 139793 | PAGE3    | 0.0424 | 1.1027 |
| 11059 | C08 | 81    | 56888  | KCMF1    | 0.0425 | 1.1027 |
| 31044 | E11 | 2341  | 4601   | MXI1     | 0.0425 | 1.1027 |
| 11012 | D10 | 130   | 6737   | TRIM21   | 0.0425 | 1.1027 |
| 11081 | E05 | 3285  | 78998  | C8orf51  | 0.0425 | 1.1028 |
| 31023 | C11 | 13625 | 26469  | PTPN18   | 0.0425 | 1.1028 |
| 11062 | F03 | 8817  | 7579   | ZSCAN20  | 0.0425 | 1.1028 |
| 31025 | F05 | 13707 | 6773   | STAT2    | 0.0425 | 1.1029 |
| 31007 | B11 | 11346 | 89932  | PAPLN    | 0.0425 | 1.1029 |
| 11068 | F09 | 4390  | 80778  | ZNF34    | 0.0425 | 1.1029 |
| 31003 | H07 | 10565 | 2673   | GFPT1    | 0.0425 | 1.1029 |
| 11057 | F02 | 9861  | 124404 | SEPT12   | 0.0426 | 1.1030 |
| 51014 | C02 | 52679 | 79783  | C7orf10  | 0.0426 | 1.1030 |
| 11068 | D12 | 7318  | 10039  | PARP3    | 0.0426 | 1.1030 |
| 51035 | D01 | 54778 | 3834   | KIF25    | 0.0426 | 1.1030 |
| 31006 | H03 | 11133 | 3768   | KCNJ12   | 0.0426 | 1.1030 |
| 11032 | H09 | 6327  | 10668  | CGRRF1   | 0.0426 | 1.1030 |
| 11015 | E05 | 5487  | 25847  | ANAPC13  | 0.0426 | 1.1030 |
| 51018 | F09 | 56773 | 1087   | CEACAM7  | 0.0426 | 1.1030 |

|       |     |       |        |             |        |        |
|-------|-----|-------|--------|-------------|--------|--------|
| 11082 | G08 | 140   | 5763   | PTMS        | 0.0426 | 1.1030 |
| 11011 | H09 | 500   | 56889  | TM9SF3      | 0.0426 | 1.1030 |
| 31025 | H10 | 14040 | 10281  | DSCR4       | 0.0426 | 1.1030 |
| 51027 | E10 | 56422 | 1375   | CPT1B       | 0.0426 | 1.1030 |
| 11016 | D03 | 8025  | 79016  | DDA1        | 0.0426 | 1.1031 |
| 11063 | D03 | 2548  | 80131  | LRRC8E      | 0.0426 | 1.1032 |
| 11040 | G02 | 8268  | 653687 | NCRNA00246B | 0.0427 | 1.1032 |
| 11076 | A06 | 2660  | 1791   | DNTT        | 0.0427 | 1.1034 |
| 51009 | F01 | 52724 | 51311  | TLR8        | 0.0427 | 1.1034 |
| 11015 | H01 | 8980  | 23370  | ARHGEF18    | 0.0427 | 1.1034 |
| 31019 | E01 | 13260 | 115106 | HAUS1       | 0.0427 | 1.1034 |
| 51032 | F08 | 55593 | 201725 | C4orf46     | 0.0427 | 1.1034 |
| 31042 | A08 | 5965  | 2274   | FHL2        | 0.0428 | 1.1036 |
| 11016 | F03 | 7799  | 26017  | FAM32A      | 0.0428 | 1.1036 |
| 11021 | G11 | 7803  | 55702  | CCDC94      | 0.0429 | 1.1037 |
| 51031 | A03 | 55237 | 388677 | NOTCH2NL    | 0.0429 | 1.1037 |
| 11006 | D03 | 8033  | 55076  | TMEM45A     | 0.0429 | 1.1038 |
| 11006 | D01 | 5437  | 51010  | EXOSC3      | 0.0429 | 1.1038 |
| 11054 | C04 | 4272  | 80761  | UPK3B       | 0.0429 | 1.1038 |
| 11084 | E03 | 6537  | 140465 | MYL6B       | 0.0429 | 1.1038 |
| 11061 | G04 | 5332  | 55437  | STRADB      | 0.0429 | 1.1038 |
| 31044 | C03 | 4564  | 4692   | NDN         | 0.0429 | 1.1039 |
| 51032 | F06 | 56459 | 200197 | C1orf126    | 0.0429 | 1.1039 |
| 11076 | G09 | 4497  | 4128   | MAOA        | 0.0430 | 1.1040 |
| 11013 | G11 | 6708  | 3303   | HSPA1A      | 0.0430 | 1.1040 |
| 11079 | F12 | 1880  | 6764   | ST5         | 0.0430 | 1.1040 |
| 31014 | D02 | 12337 | 26985  | AP3M1       | 0.0430 | 1.1041 |
| 11051 | E01 | 9724  | 147798 | TMC4        | 0.0430 | 1.1041 |
| 11008 | A11 | 562   | 63943  | FKBP1       | 0.0430 | 1.1041 |
| 11056 | F07 | 4287  | 84263  | HSDL2       | 0.0430 | 1.1041 |
| 31024 | G03 | 13646 | 1487   | CTBP1       | 0.0430 | 1.1042 |
| 11011 | E03 | 8833  | 1488   | CTBP2       | 0.0431 | 1.1042 |
| 11056 | B08 | 6755  | 9391   | CIAO1       | 0.0431 | 1.1043 |
| 31032 | C08 | 14808 | 25938  | HEATR5A     | 0.0431 | 1.1043 |
| 31024 | B08 | 13494 | 92105  | INTS4       | 0.0431 | 1.1044 |
| 11056 | A04 | 4884  | 23493  | HEY2        | 0.0431 | 1.1045 |
| 51004 | E08 | 54615 | 79993  | ELOVL7      | 0.0432 | 1.1045 |
| 11052 | A07 | 3015  | 1406   | CRX         | 0.0432 | 1.1046 |
| 11008 | F04 | 770   | 23635  | SSBP2       | 0.0432 | 1.1046 |
| 11030 | H11 | 9132  | 79989  | TTC26       | 0.0432 | 1.1046 |
| 31006 | B05 | 11149 | 374403 | TBC1D10C    | 0.0432 | 1.1047 |
| 11065 | F03 | 5621  | 54929  | TMEM161A    | 0.0432 | 1.1047 |
| 51022 | D03 | 56226 | 10599  | SLCO1B1     | 0.0432 | 1.1047 |
| 31009 | F06 | 11502 | 953    | ENTPD1      | 0.0432 | 1.1047 |

|       |     |       |        |            |        |        |
|-------|-----|-------|--------|------------|--------|--------|
| 11047 | H08 | 2368  | 9117   | SEC22C     | 0.0432 | 1.1047 |
| 11088 | G02 | 5624  | 4724   | NDUFS4     | 0.0433 | 1.1047 |
| 51025 | G07 | 56494 | 114815 | SORCS1     | 0.0433 | 1.1048 |
| 31014 | D06 | 12315 | 84656  | GLYR1      | 0.0433 | 1.1048 |
| 11068 | G02 | 9594  | 55454  | CSGALNACT2 | 0.0433 | 1.1049 |
| 11058 | B03 | 1309  | 166929 | SGMS2      | 0.0434 | 1.1050 |
| 51003 | C07 | 52607 | 342977 | NANOS3     | 0.0434 | 1.1050 |
| 11089 | B02 | 2974  | 79724  | ZNF768     | 0.0434 | 1.1050 |
| 11003 | D01 | 6130  | 6747   | SSR3       | 0.0434 | 1.1051 |
| 11083 | F01 | 9909  | 8650   | NUMB       | 0.0434 | 1.1051 |
| 11049 | G08 | 262   | 80176  | SPSB1      | 0.0434 | 1.1051 |
| 11007 | A08 | 8483  | 6834   | SURF1      | 0.0434 | 1.1051 |
| 11011 | A08 | 2714  | 6446   | SGK1       | 0.0434 | 1.1051 |
| 11058 | A06 | 2084  | 1902   | LPAR1      | 0.0434 | 1.1052 |
| 11051 | C04 | 6399  | 3290   | HSD11B1    | 0.0434 | 1.1052 |
| 51016 | E08 | 56724 | 116093 | DIRC1      | 0.0434 | 1.1052 |
| 51009 | G10 | 52727 | 84189  | SLITRK6    | 0.0434 | 1.1052 |
| 11071 | A03 | 10137 | 285195 | SLC9A9     | 0.0435 | 1.1052 |
| 11037 | B10 | 3705  | 653519 | GPR89A     | 0.0435 | 1.1053 |
| 31013 | H04 | 11897 | 9911   | TMCC2      | 0.0435 | 1.1053 |
| 31040 | H11 | 6135  | 54785  | C17orf59   | 0.0435 | 1.1053 |
| 11035 | B09 | 3691  | 25980  | C20orf4    | 0.0435 | 1.1053 |
| 11019 | D10 | 6037  | 64949  | MRPS26     | 0.0435 | 1.1053 |
| 31002 | E01 | 10320 | 9240   | PNMA1      | 0.0435 | 1.1053 |
| 51024 | F01 | 53974 | 10427  | SEC24B     | 0.0435 | 1.1054 |
| 31011 | H09 | 11845 | 128308 | MRPL55     | 0.0435 | 1.1054 |
| 11022 | F12 | 3339  | 9618   | TRAF4      | 0.0435 | 1.1054 |
| 11059 | B01 | 4562  | 60491  | NIF3L1     | 0.0435 | 1.1054 |
| 11036 | C04 | 2543  | 55750  | AGK        | 0.0435 | 1.1055 |
| 11011 | C04 | 519   | 9245   | GCNT3      | 0.0436 | 1.1055 |
| 11079 | F10 | 5900  | 6560   | SLC12A4    | 0.0436 | 1.1055 |
| 11054 | A02 | 6109  | 6175   | RPLP0      | 0.0436 | 1.1056 |
| 11074 | B05 | 5467  | 56925  | LXN        | 0.0436 | 1.1056 |
| 11071 | G07 | 9359  | 65979  | PHACTR4    | 0.0436 | 1.1056 |
| 11044 | E05 | 307   | 10741  | RBBP9      | 0.0436 | 1.1056 |
| 11065 | G05 | 8448  | 11221  | DUSP10     | 0.0436 | 1.1057 |
| 11005 | D04 | 8646  | 51313  | FAM198B    | 0.0436 | 1.1057 |
| 11002 | H02 | 9577  | 8034   | SLC25A16   | 0.0436 | 1.1057 |
| 11074 | A02 | 8875  | 23549  | DNPEP      | 0.0437 | 1.1057 |
| 11017 | F01 | 4032  | 3014   | H2AFX      | 0.0437 | 1.1058 |
| 11057 | F03 | 9559  | 4081   | MAB21L1    | 0.0437 | 1.1058 |
| 31042 | E01 | 4838  | 55471  | C2orf56    | 0.0437 | 1.1059 |
| 11072 | D02 | 2304  | 64770  | CCDC14     | 0.0437 | 1.1059 |
| 11054 | G02 | 2852  | 51101  | FAM164A    | 0.0437 | 1.1059 |

|       |     |       |        |          |        |        |
|-------|-----|-------|--------|----------|--------|--------|
| 11061 | D04 | 644   | 3705   | ITPK1    | 0.0437 | 1.1059 |
| 51014 | F04 | 52996 | 7068   | THRB     | 0.0438 | 1.1060 |
| 11076 | D06 | 152   | 5987   | TRIM27   | 0.0438 | 1.1060 |
| 11016 | H10 | 7364  | 172    | AFG3L1   | 0.0438 | 1.1060 |
| 51027 | B04 | 55426 | 6545   | SLC7A4   | 0.0438 | 1.1061 |
| 51032 | G01 | 53243 | 345778 | MTX3     | 0.0438 | 1.1061 |
| 31043 | B08 | 7842  | 55254  | TMEM39A  | 0.0438 | 1.1062 |
| 11087 | B07 | 4546  | 7791   | ZYX      | 0.0439 | 1.1063 |
| 31034 | B10 | 14891 | 8726   | EED      | 0.0439 | 1.1063 |
| 11048 | F08 | 5961  | 23435  | TARDBP   | 0.0439 | 1.1063 |
| 31010 | D02 | 11509 | 57864  | SLC46A2  | 0.0439 | 1.1064 |
| 11073 | B02 | 4074  | 51499  | TRIAP1   | 0.0439 | 1.1065 |
| 11076 | G10 | 1228  | 55356  | SLC22A15 | 0.0439 | 1.1065 |
| 11064 | A11 | 814   | 132158 | GLYCTK   | 0.0440 | 1.1065 |
| 11001 | D01 | 8776  | 2045   | EPHA7    | 0.0440 | 1.1065 |
| 11008 | F01 | 52    | 5250   | SLC25A3  | 0.0440 | 1.1067 |
| 11006 | D02 | 9252  | 114960 | TSGA13   | 0.0440 | 1.1068 |
| 11069 | E04 | 4268  | 10489  | LRRC41   | 0.0441 | 1.1068 |
| 11053 | E01 | 3684  | 8774   | NAPG     | 0.0441 | 1.1068 |
| 11036 | F06 | 3480  | 5641   | LGMN     | 0.0441 | 1.1068 |
| 11048 | F11 | 614   | 760    | CA2      | 0.0441 | 1.1068 |
| 11087 | A02 | 5690  | 5408   | PNLIPRP2 | 0.0441 | 1.1068 |
| 31024 | F11 | 13552 | 80235  | PIGZ     | 0.0441 | 1.1068 |
| 11043 | F08 | 4748  | 4716   | NDUFB10  | 0.0441 | 1.1069 |
| 11049 | D02 | 8528  | 54860  | MS4A12   | 0.0441 | 1.1069 |
| 11044 | C01 | 8571  | 1974   | EIF4A2   | 0.0441 | 1.1069 |
| 31008 | C03 | 11664 | 7411   | VBP1     | 0.0442 | 1.1071 |
| 11063 | G02 | 2766  | 3475   | IFRD1    | 0.0442 | 1.1071 |
| 31045 | D07 | 9803  | 146556 | C16orf89 | 0.0442 | 1.1072 |
| 31024 | E08 | 13431 | 93100  | NAPRT1   | 0.0442 | 1.1073 |
| 11030 | D12 | 9379  | 132954 | PDCL2    | 0.0443 | 1.1073 |
| 11014 | D07 | 4457  | 327    | APEH     | 0.0443 | 1.1073 |
| 51002 | G08 | 55263 | 10518  | CIB2     | 0.0443 | 1.1073 |
| 51027 | F12 | 15001 | 200081 | TXLNA    | 0.0443 | 1.1073 |
| 51024 | F11 | 55205 | 120892 | LRRK2    | 0.0443 | 1.1074 |
| 31008 | H01 | 11390 | 124944 | C17orf49 | 0.0443 | 1.1075 |
| 11053 | B01 | 7929  | 5531   | PPP4C    | 0.0444 | 1.1075 |
| 11065 | A04 | 4551  | 11338  | U2AF2    | 0.0444 | 1.1076 |
| 11049 | A04 | 492   | 55707  | NECAP2   | 0.0444 | 1.1076 |
| 31021 | G07 | 13171 | 60412  | EXOC4    | 0.0444 | 1.1076 |
| 11066 | D06 | 2075  | 170384 | FUT11    | 0.0444 | 1.1076 |
| 31014 | G11 | 12263 | 54808  | DYM      | 0.0444 | 1.1076 |
| 31028 | F07 | 14105 | 6518   | SLC2A5   | 0.0444 | 1.1076 |
| 11047 | A06 | 1010  | 140545 | RNF32    | 0.0444 | 1.1077 |

|       |     |       |        |          |        |        |
|-------|-----|-------|--------|----------|--------|--------|
| 11075 | E08 | 2555  | 4049   | LTA      | 0.0444 | 1.1077 |
| 31030 | D10 | 14265 | 163259 | DENND2C  | 0.0445 | 1.1078 |
| 51025 | F06 | 55361 | 3720   | JARID2   | 0.0445 | 1.1078 |
| 31018 | B09 | 13027 | 123811 | C16orf63 | 0.0445 | 1.1079 |
| 11061 | E11 | 8113  | 2222   | FDFT1    | 0.0445 | 1.1079 |
| 11041 | H10 | 8914  | 84553  | C6orf168 | 0.0445 | 1.1079 |
| 11018 | A11 | 3521  | 8409   | UXT      | 0.0445 | 1.1080 |
| 11057 | D11 | 5975  | 10807  | SDCCAG3  | 0.0445 | 1.1080 |
| 51033 | B09 | 54795 | 158381 | ATP8B5P  | 0.0445 | 1.1080 |
| 51023 | D11 | 56238 | 9889   | ZBED4    | 0.0446 | 1.1081 |
| 11064 | B06 | 1143  | 55079  | FEZF2    | 0.0446 | 1.1082 |
| 11062 | G05 | 10233 | 7597   | ZBTB25   | 0.0447 | 1.1083 |
| 31015 | B08 | 12481 | 79140  | CCDC28B  | 0.0447 | 1.1084 |
| 11076 | H05 | 4458  | 2193   | FARSA    | 0.0447 | 1.1084 |
| 11069 | D12 | 1420  | 150771 | ITPRIPL1 | 0.0447 | 1.1085 |
| 31040 | F08 | 10161 | 51513  | ETV7     | 0.0447 | 1.1085 |
| 31017 | C06 | 13273 | 1665   | DHX15    | 0.0448 | 1.1085 |
| 31003 | E03 | 10520 | 22836  | RHOBTB3  | 0.0448 | 1.1086 |
| 11039 | H03 | 1567  | 2733   | GLE1     | 0.0448 | 1.1086 |
| 11066 | G03 | 10062 | 331    | XIAP     | 0.0448 | 1.1087 |
| 11068 | F10 | 7121  | 51043  | ZBTB7B   | 0.0448 | 1.1087 |
| 11051 | A03 | 1819  | 56267  | CCBL2    | 0.0448 | 1.1088 |
| 11004 | F07 | 165   | 11158  | RABL2B   | 0.0448 | 1.1088 |
| 31033 | B04 | 14673 | 1738   | DLD      | 0.0449 | 1.1089 |
| 11077 | D12 | 1919  | 26060  | APPL1    | 0.0449 | 1.1089 |
| 11061 | B02 | 3743  | 3920   | LAMP2    | 0.0449 | 1.1089 |
| 11079 | G08 | 7704  | 8473   | OGT      | 0.0449 | 1.1090 |
| 11002 | H07 | 9995  | 51714  | SELT     | 0.0449 | 1.1090 |
| 11086 | G07 | 8016  | 26268  | FBXO9    | 0.0449 | 1.1090 |
| 11035 | D11 | 3386  | 8703   | B4GALT3  | 0.0449 | 1.1090 |
| 11062 | D10 | 9828  | 27285  | TEKT2    | 0.0449 | 1.1090 |
| 11060 | E12 | 5485  | 51000  | SLC35B3  | 0.0449 | 1.1090 |
| 31038 | E11 | 9715  | 8200   | GDF5     | 0.0449 | 1.1090 |
| 11046 | F02 | 4789  | 2947   | GSTM3    | 0.0449 | 1.1090 |
| 11004 | A04 | 2039  | 142679 | DUSP19   | 0.0450 | 1.1090 |
| 31029 | H06 | 14208 | 88455  | ANKRD13A | 0.0450 | 1.1091 |
| 31015 | A04 | 12817 | 53354  | PANK1    | 0.0450 | 1.1091 |
| 11068 | F07 | 9620  | 7726   | TRIM26   | 0.0450 | 1.1091 |
| 11036 | A09 | 6458  | 5055   | SERPINB2 | 0.0450 | 1.1092 |
| 11040 | D02 | 4207  | 4900   | NRGN     | 0.0450 | 1.1093 |
| 11056 | A11 | 3511  | 51409  | HEMK1    | 0.0450 | 1.1093 |
| 51016 | E11 | 55979 | 219293 | ATAD3C   | 0.0451 | 1.1093 |
| 31005 | F04 | 10961 | 5693   | PSMB5    | 0.0451 | 1.1094 |
| 51032 | H03 | 56863 | 57624  | KIAA1486 | 0.0451 | 1.1094 |

|       |     |       |        |           |        |        |
|-------|-----|-------|--------|-----------|--------|--------|
| 11054 | H11 | 4240  | 55715  | DOK4      | 0.0451 | 1.1095 |
| 51030 | F06 | 55461 | 23366  | KIAA0895  | 0.0451 | 1.1095 |
| 51012 | D09 | 53030 | 84140  | FAM161A   | 0.0451 | 1.1095 |
| 11055 | F08 | 2666  | 5608   | MAP2K6    | 0.0451 | 1.1095 |
| 11059 | A03 | 9765  | 284273 | ZADH2     | 0.0451 | 1.1095 |
| 31009 | F09 | 11560 | 79692  | ZNF322A   | 0.0451 | 1.1095 |
| 11073 | C12 | 887   | 6003   | RGS13     | 0.0452 | 1.1096 |
| 31029 | B10 | 14377 | 112401 | BIRC8     | 0.0452 | 1.1096 |
| 11050 | H08 | 626   | 10007  | GNPDA1    | 0.0452 | 1.1097 |
| 11061 | E04 | 5858  | 11041  | B3GNT1    | 0.0452 | 1.1098 |
| 11055 | C08 | 2875  | 84457  | PHYHIPL   | 0.0452 | 1.1098 |
| 51035 | E09 | 53695 | 89792  | GAL3ST3   | 0.0453 | 1.1099 |
| 11074 | C08 | 5647  | 9166   | EBAG9     | 0.0453 | 1.1099 |
| 11008 | H03 | 5707  | 3107   | HLA-C     | 0.0453 | 1.1100 |
| 11040 | G04 | 9184  | 3112   | HLA-DOB   | 0.0453 | 1.1100 |
| 11059 | A06 | 4964  | 5195   | PEX14     | 0.0454 | 1.1101 |
| 31015 | D10 | 12516 | 63877  | C10orf84  | 0.0454 | 1.1102 |
| 31028 | E08 | 15055 | 152559 | PAQR3     | 0.0454 | 1.1102 |
| 31004 | E04 | 10737 | 1659   | DHX8      | 0.0454 | 1.1103 |
| 51013 | C03 | 54328 | 8875   | VNN2      | 0.0455 | 1.1104 |
| 11068 | B05 | 9567  | 10188  | TNK2      | 0.0455 | 1.1104 |
| 11068 | B11 | 2404  | 506    | ATP5B     | 0.0455 | 1.1105 |
| 51025 | A08 | 14804 | 57466  | SFRS15    | 0.0455 | 1.1105 |
| 11048 | D02 | 2897  | 30818  | KCNIP3    | 0.0455 | 1.1105 |
| 51004 | F05 | 54388 | 51050  | PI15      | 0.0455 | 1.1105 |
| 51031 | H03 | 56676 | 375612 | LHFPL3    | 0.0455 | 1.1105 |
| 11044 | F02 | 6958  | 28957  | MRPS28    | 0.0455 | 1.1105 |
| 11074 | C11 | 5591  | 51053  | GMNN      | 0.0455 | 1.1105 |
| 31038 | C06 | 14268 | 4855   | NOTCH4    | 0.0456 | 1.1106 |
| 11022 | H10 | 3727  | 4688   | NCF2      | 0.0456 | 1.1106 |
| 51034 | D03 | 53915 | 158055 | C9orf163  | 0.0456 | 1.1106 |
| 51010 | A04 | 52992 | 91807  | MYLK3     | 0.0456 | 1.1107 |
| 11044 | G02 | 4184  | 8834   | TMEM11    | 0.0456 | 1.1107 |
| 51027 | E05 | 11975 | 9572   | NR1D1     | 0.0456 | 1.1107 |
| 11057 | E05 | 5020  | 26505  | CNNM3     | 0.0456 | 1.1107 |
| 51001 | C01 | 53399 | 10896  | OCLM      | 0.0456 | 1.1108 |
| 51030 | H01 | 55608 | 50809  | HP1BP3    | 0.0456 | 1.1108 |
| 51012 | G01 | 54719 | 255928 | SYT14     | 0.0457 | 1.1109 |
| 11070 | B05 | 7607  | 51497  | TH1L      | 0.0457 | 1.1110 |
| 11005 | F08 | 47    | 25912  | C1orf43   | 0.0457 | 1.1110 |
| 11002 | E08 | 5808  | 3043   | HBB       | 0.0457 | 1.1110 |
| 11016 | H02 | 3201  | 118433 | RPL23AP7  | 0.0457 | 1.1111 |
| 11040 | C09 | 6837  | 113386 | LOC113386 | 0.0458 | 1.1112 |
| 31018 | B06 | 12976 | 54959  | ODAM      | 0.0458 | 1.1113 |

|       |     |       |        |          |        |        |
|-------|-----|-------|--------|----------|--------|--------|
| 31016 | E05 | 12504 | 2355   | FOSL2    | 0.0459 | 1.1115 |
| 11035 | F09 | 3438  | 79188  | TMEM43   | 0.0459 | 1.1116 |
| 11071 | F10 | 45    | 54496  | PRMT7    | 0.0459 | 1.1116 |
| 31045 | C03 | 4915  | 84811  | BUD13    | 0.0460 | 1.1117 |
| 11047 | B11 | 9422  | 541468 | C1orf190 | 0.0460 | 1.1117 |
| 11063 | C12 | 769   | 133619 | PRRC1    | 0.0460 | 1.1118 |
| 11051 | G09 | 23    | 51035  | UBXN1    | 0.0461 | 1.1119 |
| 31036 | G09 | 12339 | 1656   | DDX6     | 0.0461 | 1.1120 |
| 31018 | G10 | 13087 | 55937  | APOM     | 0.0461 | 1.1120 |
| 11026 | E02 | 9785  | 80205  | CHD9     | 0.0461 | 1.1121 |
| 51020 | F04 | 56633 | 163071 | ZNF114   | 0.0461 | 1.1121 |
| 51011 | A02 | 55028 | 60625  | DHX35    | 0.0461 | 1.1121 |
| 11027 | D03 | 915   | 7323   | UBE2D3   | 0.0462 | 1.1121 |
| 11038 | H01 | 2434  | 8031   | NCOA4    | 0.0462 | 1.1122 |
| 11032 | E01 | 9243  | 121793 | C13orf16 | 0.0462 | 1.1123 |
| 51002 | A05 | 52745 | 128872 | HMGB3L1  | 0.0462 | 1.1123 |
| 31007 | E10 | 11627 | NA     | NA       | 0.0462 | 1.1123 |
| 51008 | A04 | 54422 | 9990   | SLC12A6  | 0.0463 | 1.1124 |
| 11059 | C03 | 9972  | 187    | APLNR    | 0.0463 | 1.1125 |
| 11054 | G07 | 2888  | 3155   | HMGCL    | 0.0463 | 1.1125 |
| 11060 | D12 | 2258  | 257062 | TMEM146  | 0.0463 | 1.1126 |
| 31009 | C05 | 11329 | 3737   | KCNA2    | 0.0463 | 1.1126 |
| 51026 | E02 | 56845 | 57535  | KIAA1324 | 0.0463 | 1.1126 |
| 51013 | F10 | 54095 | 10587  | TXNRD2   | 0.0464 | 1.1126 |
| 51011 | G08 | 54833 | 84939  | MUM1     | 0.0464 | 1.1127 |
| 11022 | H02 | 5384  | 11137  | PWP1     | 0.0464 | 1.1127 |
| 11008 | G06 | 6028  | 10474  | TADA3    | 0.0464 | 1.1128 |
| 11069 | D07 | 7745  | 7587   | ZNF37A   | 0.0464 | 1.1128 |
| 11086 | B06 | 190   | 5977   | DPF2     | 0.0464 | 1.1128 |
| 11015 | E06 | 6332  | 9140   | ATG12    | 0.0464 | 1.1129 |
| 11074 | E02 | 2034  | 389874 | ZCCHC13  | 0.0464 | 1.1129 |
| 51012 | H01 | 52830 | 125919 | ZNF543   | 0.0464 | 1.1129 |
| 11074 | F01 | 1648  | 80759  | KHDC1    | 0.0465 | 1.1129 |
| 11066 | E11 | 7713  | 8973   | CHRNA6   | 0.0465 | 1.1130 |
| 31030 | H04 | 14402 | 3838   | KPNA2    | 0.0465 | 1.1130 |
| 11044 | D04 | 6596  | 79685  | SAP30L   | 0.0465 | 1.1130 |
| 11056 | F02 | 5648  | 55577  | NAGK     | 0.0465 | 1.1130 |
| 11034 | H04 | 1649  | 23209  | MLC1     | 0.0465 | 1.1130 |
| 51023 | B11 | 56259 | 23095  | KIF1B    | 0.0465 | 1.1131 |
| 11071 | B09 | 9337  | 25921  | ZDHHC5   | 0.0465 | 1.1131 |
| 11084 | D03 | 4004  | 8772   | FADD     | 0.0466 | 1.1132 |
| 31005 | C04 | 11006 | 83871  | RAB34    | 0.0466 | 1.1132 |
| 31007 | F09 | 11478 | 6358   | CCL14    | 0.0466 | 1.1133 |
| 11014 | F01 | 4505  | 60493  | FASTKD5  | 0.0466 | 1.1134 |

|       |     |       |        |          |        |        |
|-------|-----|-------|--------|----------|--------|--------|
| 11052 | D11 | 1176  | 121274 | ZNF641   | 0.0466 | 1.1134 |
| 51014 | A03 | 55009 | 3570   | IL6R     | 0.0466 | 1.1134 |
| 31003 | A11 | 10780 | 8065   | CUL5     | 0.0467 | 1.1134 |
| 51021 | G08 | 55733 | 50717  | DCAF8    | 0.0467 | 1.1134 |
| 31003 | F05 | 10508 | 57689  | LRRC4C   | 0.0467 | 1.1134 |
| 11059 | C05 | 6996  | 54516  | MTRF1L   | 0.0467 | 1.1136 |
| 31009 | G10 | 11805 | 4088   | SMAD3    | 0.0467 | 1.1136 |
| 11004 | G09 | 2791  | 90523  | C6orf142 | 0.0467 | 1.1136 |
| 11082 | C10 | 9045  | 84335  | AKT1S1   | 0.0467 | 1.1136 |
| 11078 | D02 | 5852  | 90678  | LRSAM1   | 0.0468 | 1.1137 |
| 51014 | E09 | 52905 | 7818   | DAP3     | 0.0468 | 1.1138 |
| 51022 | C11 | 56183 | 81793  | TLR10    | 0.0468 | 1.1139 |
| 51010 | E04 | 53979 | 54431  | DNAJC10  | 0.0468 | 1.1139 |
| 11032 | E09 | 1869  | 117584 | RFFL     | 0.0469 | 1.1139 |
| 11068 | A11 | 8514  | 66002  | CYP4F12  | 0.0469 | 1.1139 |
| 31015 | C11 | 12625 | 28786  | IGLV4-3  | 0.0469 | 1.1141 |
| 11002 | H11 | 9010  | 2966   | GTF2H2   | 0.0469 | 1.1142 |
| 11009 | F02 | 3230  | 23061  | TBC1D9B  | 0.0469 | 1.1142 |
| 11006 | B02 | 8444  | 10179  | RBM7     | 0.0470 | 1.1142 |
| 51020 | H07 | 56787 | 10000  | AKT3     | 0.0470 | 1.1143 |
| 31001 | F07 | 10258 | 54664  | TMEM106B | 0.0470 | 1.1143 |
| 31039 | D06 | 909   | 51371  | POMP     | 0.0470 | 1.1143 |
| 11015 | C10 | 9057  | 55750  | AGK      | 0.0470 | 1.1144 |
| 11048 | A03 | 6598  | 113130 | CDCA5    | 0.0470 | 1.1144 |
| 51005 | E12 | 53543 | 9123   | SLC16A3  | 0.0471 | 1.1144 |
| 11058 | E02 | 4181  | 55968  | NSFL1C   | 0.0471 | 1.1145 |
| 11011 | G03 | 7843  | 92715  | WDR85    | 0.0471 | 1.1146 |
| 11011 | D05 | 3025  | 9807   | IP6K1    | 0.0471 | 1.1146 |
| 11053 | F04 | 1258  | 1428   | CRYM     | 0.0471 | 1.1146 |
| 11014 | F05 | 7727  | 6774   | STAT3    | 0.0471 | 1.1146 |
| 11048 | D01 | 6320  | 51297  | PLUNC    | 0.0471 | 1.1146 |
| 11046 | B02 | 2433  | 2810   | SFN      | 0.0472 | 1.1147 |
| 31005 | E10 | 10956 | 55314  | TMEM144  | 0.0472 | 1.1147 |
| 31022 | E01 | 13350 | 6699   | SPRR1B   | 0.0472 | 1.1147 |
| 51004 | F08 | 55713 | 221120 | ALKBH3   | 0.0472 | 1.1148 |
| 51015 | D03 | 52821 | 126520 | PLK5P    | 0.0472 | 1.1149 |
| 11012 | D03 | 5963  | 92745  | SLC38A5  | 0.0472 | 1.1149 |
| 11085 | D03 | 7601  | 1716   | DGUOK    | 0.0472 | 1.1149 |
| 51014 | B04 | 54240 | 93233  | CCDC114  | 0.0472 | 1.1149 |
| 31042 | G10 | 5920  | 2091   | FBL      | 0.0473 | 1.1150 |
| 11005 | C04 | 3064  | 25949  | SYF2     | 0.0473 | 1.1151 |
| 11004 | F03 | 8072  | 127703 | C1orf216 | 0.0474 | 1.1152 |
| 11014 | F08 | 6238  | 5213   | PFKM     | 0.0474 | 1.1152 |
| 31001 | G10 | 10530 | 124626 | ZBP2     | 0.0474 | 1.1153 |



|       |     |       |           |          |        |        |
|-------|-----|-------|-----------|----------|--------|--------|
| 51014 | E10 | 52726 | 89780     | WNT3A    | 0.0474 | 1.1154 |
| 11086 | E05 | 3522  | 8440      | NCK2     | 0.0474 | 1.1154 |
| 11048 | C02 | 4061  | 10197     | PSME3    | 0.0475 | 1.1155 |
| 11064 | B01 | 139   | 64788     | LMF1     | 0.0475 | 1.1155 |
| 11059 | G05 | 4538  | 60672     | MIIIP    | 0.0475 | 1.1155 |
| 51026 | F02 | 56697 | 201134    | CCDC46   | 0.0475 | 1.1155 |
| 11054 | G09 | 3251  | 10327     | AKR1A1   | 0.0475 | 1.1156 |
| 31007 | D02 | 10812 | 9852      | EPM2AIP1 | 0.0475 | 1.1156 |
| 11032 | C09 | 10089 | 23332     | CLASP1   | 0.0475 | 1.1156 |
| 11077 | B10 | 8485  | 84708     | LNX1     | 0.0475 | 1.1157 |
| 11084 | H02 | 5897  | 55257     | C20orf20 | 0.0475 | 1.1157 |
| 11013 | G08 | 6887  | 10994     | ILVBL    | 0.0476 | 1.1158 |
| 11077 | E10 | 1122  | 5137      | PDE1C    | 0.0476 | 1.1158 |
| 11047 | C12 | 9290  | 146849    | CCDC42   | 0.0476 | 1.1158 |
| 11030 | D01 | 5998  | 3692      | EIF6     | 0.0476 | 1.1158 |
| 31040 | D09 | 9433  | 64518     | TEKT3    | 0.0476 | 1.1158 |
| 51031 | B12 | 53233 | 129852    | C2orf73  | 0.0476 | 1.1158 |
| 11039 | G01 | 8068  | 7216      | TRO      | 0.0476 | 1.1158 |
| 31019 | C04 | 12909 | 10993     | SDS      | 0.0476 | 1.1159 |
| 51035 | G04 | 54534 | 92305     | TMEM129  | 0.0476 | 1.1159 |
| 51032 | G07 | 55358 | 125704    | FAM69C   | 0.0477 | 1.1160 |
| 31044 | H07 | 5087  | 23136     | EPB41L3  | 0.0477 | 1.1161 |
| 31034 | H03 | 14825 | 127255    | LRRIQ3   | 0.0477 | 1.1161 |
| 11026 | A02 | 2326  | 414926    | C15orf50 | 0.0477 | 1.1161 |
| 11011 | E12 | 3222  | 83743     | GRWD1    | 0.0477 | 1.1162 |
| 11061 | C07 | 4830  | 6839      | SUV39H1  | 0.0478 | 1.1162 |
| 31001 | E08 | 10653 | 90806     | ANGEL2   | 0.0478 | 1.1163 |
| 11015 | E08 | 9146  | 100188893 | TOMM6    | 0.0478 | 1.1163 |
| 51022 | C08 | 55878 | 57124     | CD248    | 0.0478 | 1.1163 |
| 51030 | D01 | 53311 | 338645    | LUZP2    | 0.0478 | 1.1164 |
| 31004 | G01 | 10438 | 1000      | CDH2     | 0.0478 | 1.1164 |
| 51013 | A09 | 52766 | 285343    | C3orf23  | 0.0478 | 1.1164 |
| 31012 | C05 | 12364 | 80145     | THOC7    | 0.0478 | 1.1164 |
| 11060 | C08 | 7388  | 64431     | ACTR6    | 0.0478 | 1.1164 |
| 11048 | C03 | 230   | 220134    | SKA1     | 0.0478 | 1.1165 |
| 11003 | H06 | 2005  | 92597     | MOBKL1A  | 0.0478 | 1.1165 |
| 11006 | F08 | 9479  | 122046    | C13orf26 | 0.0478 | 1.1165 |
| 51024 | D03 | 55201 | 56992     | KIF15    | 0.0479 | 1.1165 |
| 51027 | D12 | 53178 | 55015     | PRPF39   | 0.0479 | 1.1166 |
| 51021 | G11 | 55854 | 1137      | CHRNA4   | 0.0479 | 1.1166 |
| 11043 | E04 | 4580  | 29098     | RANGRF   | 0.0479 | 1.1166 |
| 51027 | H03 | 55524 | 119       | ADD2     | 0.0479 | 1.1167 |
| 11011 | B01 | 5246  | 79102     | RNF26    | 0.0480 | 1.1168 |
| 31007 | C04 | 10831 | 22878     | KIAA1012 | 0.0480 | 1.1169 |

|       |     |       |        |           |        |        |
|-------|-----|-------|--------|-----------|--------|--------|
| 11026 | B11 | 6088  | 51241  | COX16     | 0.0480 | 1.1169 |
| 31039 | C05 | 8647  | 29985  | SLC39A3   | 0.0481 | 1.1170 |
| 11021 | E07 | 4003  | 10554  | AGPAT1    | 0.0481 | 1.1170 |
| 51032 | F07 | 55434 | 124912 | SPACA3    | 0.0481 | 1.1172 |
| 11021 | B09 | 8022  | 4722   | NDUFS3    | 0.0482 | 1.1173 |
| 11003 | E10 | 2235  | 200931 | OSTalpha  | 0.0482 | 1.1173 |
| 11002 | F03 | 9950  | 58490  | RPRD1B    | 0.0482 | 1.1173 |
| 11065 | E05 | 4916  | 29997  | GLTSCR2   | 0.0482 | 1.1174 |
| 11061 | D08 | 10167 | 55351  | STK32B    | 0.0482 | 1.1174 |
| 11074 | D03 | 2134  | 125875 | CLDND2    | 0.0482 | 1.1175 |
| 51004 | B04 | 52851 | 8403   | SOX14     | 0.0482 | 1.1175 |
| 11005 | D12 | 9852  | 286053 | NSMCE2    | 0.0483 | 1.1176 |
| 11077 | B04 | 1227  | 373    | TRIM23    | 0.0483 | 1.1177 |
| 51001 | F06 | 14014 | 81698  | C15orf5   | 0.0484 | 1.1178 |
| 51014 | F11 | 52890 | 8838   | WISP3     | 0.0484 | 1.1178 |
| 11071 | D05 | 9947  | 55212  | BBS7      | 0.0484 | 1.1179 |
| 31011 | A08 | 12122 | 400590 | LOC400590 | 0.0484 | 1.1179 |
| 51032 | H06 | 56552 | 284618 | C1orf104  | 0.0484 | 1.1179 |
| 11025 | F11 | 1603  | 3631   | INPP4A    | 0.0484 | 1.1179 |
| 11022 | D11 | 7598  | 23464  | GCAT      | 0.0484 | 1.1179 |
| 51008 | B10 | 56337 | 54856  | GON4L     | 0.0484 | 1.1180 |
| 11076 | D03 | 4881  | 57050  | UTP3      | 0.0484 | 1.1180 |
| 11032 | D04 | 9350  | 1912   | PHC2      | 0.0485 | 1.1181 |
| 51027 | H09 | 56913 | 340075 | ARSI      | 0.0485 | 1.1181 |
| 31004 | D07 | 11065 | 130576 | LYPD6B    | 0.0485 | 1.1181 |
| 11068 | A06 | 7088  | 10458  | BAIAP2    | 0.0485 | 1.1182 |
| 11079 | C09 | 7871  | 701    | BUB1B     | 0.0485 | 1.1182 |
| 51033 | F05 | 54072 | 54067  | C21orf49  | 0.0485 | 1.1183 |
| 11008 | G02 | 5868  | 79991  | OBFC1     | 0.0486 | 1.1183 |
| 51030 | A08 | 53295 | 6547   | SLC8A3    | 0.0486 | 1.1183 |
| 11015 | C06 | 6256  | 284942 | RPL23AP82 | 0.0486 | 1.1183 |
| 51008 | D12 | 53080 | 23196  | FAM120A   | 0.0486 | 1.1183 |
| 11054 | B05 | 3731  | 5631   | PRPS1     | 0.0486 | 1.1183 |
| 11025 | H03 | 4969  | 7318   | UBA7      | 0.0486 | 1.1183 |
| 11065 | A05 | 6527  | 7453   | WARS      | 0.0486 | 1.1184 |
| 11075 | C12 | 4958  | 467    | ATF3      | 0.0486 | 1.1184 |
| 51027 | D08 | 53363 | 317761 | C14orf39  | 0.0486 | 1.1185 |
| 11039 | A07 | 1724  | 164127 | C1orf65   | 0.0486 | 1.1185 |
| 11010 | H01 | 652   | 55032  | SLC35A5   | 0.0486 | 1.1185 |
| 11047 | A04 | 6818  | 9235   | IL32      | 0.0486 | 1.1185 |
| 11012 | B09 | 69    | 7431   | VIM       | 0.0487 | 1.1186 |
| 31008 | E12 | 11616 | 9      | NAT1      | 0.0487 | 1.1186 |
| 11036 | H05 | 6323  | 9318   | COPS2     | 0.0487 | 1.1186 |
| 11071 | H09 | 1665  | 1012   | CDH13     | 0.0487 | 1.1186 |

|       |     |       |        |           |        |        |
|-------|-----|-------|--------|-----------|--------|--------|
| 11067 | G05 | 613   | 22827  | PUF60     | 0.0487 | 1.1187 |
| 11079 | E03 | 7836  | 10025  | MED16     | 0.0487 | 1.1188 |
| 11027 | F10 | 8151  | 26525  | IL1F5     | 0.0488 | 1.1188 |
| 11014 | C05 | 2436  | 6897   | TARS      | 0.0488 | 1.1190 |
| 11048 | D08 | 265   | 5567   | PRKACB    | 0.0488 | 1.1190 |
| 11064 | G02 | 560   | 8797   | TNFRSF10A | 0.0489 | 1.1191 |
| 51010 | E03 | 52705 | 56127  | PCDHB9    | 0.0489 | 1.1191 |
| 11026 | A11 | 8756  | 54431  | DNAJC10   | 0.0489 | 1.1191 |
| 31043 | C01 | 5304  | 84968  | PNMA6A    | 0.0489 | 1.1192 |
| 11042 | E09 | 4983  | 1175   | AP2S1     | 0.0489 | 1.1192 |
| 51010 | G11 | 53837 | 91828  | C14orf73  | 0.0490 | 1.1194 |
| 51009 | C11 | 54556 | 10509  | SEMA4B    | 0.0490 | 1.1194 |
| 31006 | E02 | 11211 | 55680  | RUFY2     | 0.0490 | 1.1194 |
| 11035 | H11 | 6957  | 51177  | PLEKHO1   | 0.0490 | 1.1195 |
| 11051 | F12 | 3263  | 51075  | TMX2      | 0.0490 | 1.1195 |
| 51033 | B04 | 53376 | 84099  | ID2B      | 0.0490 | 1.1196 |
| 11008 | E06 | 3174  | 5162   | PDHB      | 0.0491 | 1.1196 |
| 11005 | F11 | 9848  | 2214   | FCGR3A    | 0.0491 | 1.1196 |
| 11084 | B09 | 4062  | 5354   | PLP1      | 0.0491 | 1.1197 |
| 31004 | H06 | 10995 | 440093 | H3F3C     | 0.0491 | 1.1197 |
| 11049 | D11 | 5130  | 9019   | MPZL1     | 0.0491 | 1.1198 |
| 51013 | F05 | 53792 | 140807 | KRT72     | 0.0491 | 1.1198 |
| 51033 | C10 | 54863 | 6370   | CCL25     | 0.0491 | 1.1198 |
| 11063 | G01 | 9833  | 81027  | TUBB1     | 0.0492 | 1.1199 |
| 11055 | C10 | 7528  | 8572   | PDLIM4    | 0.0492 | 1.1199 |
| 11008 | A09 | 2827  | 27156  | RTDR1     | 0.0492 | 1.1199 |
| 31023 | D09 | 13648 | 3581   | IL9R      | 0.0492 | 1.1200 |
| 11022 | A10 | 7631  | 128    | ADH5      | 0.0493 | 1.1201 |
| 31031 | F04 | 14587 | 55801  | IL26      | 0.0493 | 1.1202 |
| 51030 | A09 | 55563 | 81542  | TMX1      | 0.0493 | 1.1203 |
| 11069 | B06 | 2363  | 2557   | GABRA4    | 0.0494 | 1.1204 |
| 11011 | B10 | 333   | 55791  | C1orf103  | 0.0494 | 1.1205 |
| 11074 | H09 | 1868  | 89885  | FATE1     | 0.0494 | 1.1205 |
| 31023 | F09 | 13402 | 55255  | WDR41     | 0.0494 | 1.1205 |
| 11039 | H07 | 5289  | 10780  | ZNF234    | 0.0494 | 1.1206 |
| 31032 | E09 | 14777 | 27283  | TINAG     | 0.0495 | 1.1206 |
| 11066 | D09 | 639   | 23452  | ANGPTL2   | 0.0495 | 1.1206 |
| 11006 | G03 | 7340  | 115024 | NT5C3L    | 0.0495 | 1.1207 |
| 11067 | D09 | 9549  | 260293 | CYP4X1    | 0.0495 | 1.1207 |
| 51034 | D12 | 54038 | 142683 | ITLN2     | 0.0495 | 1.1207 |
| 11012 | C09 | 533   | 2114   | ETS2      | 0.0495 | 1.1208 |
| 51015 | E08 | 52923 | 951    | CD37      | 0.0495 | 1.1208 |
| 51014 | D01 | 53361 | 9604   | RNF14     | 0.0496 | 1.1209 |
| 31012 | D03 | 12084 | 56287  | GKN1      | 0.0496 | 1.1209 |

|       |     |       |        |          |        |        |
|-------|-----|-------|--------|----------|--------|--------|
| 51024 | D07 | 56343 | 22844  | FRMPD1   | 0.0496 | 1.1210 |
| 11029 | G06 | 8211  | 152815 | THAP6    | 0.0496 | 1.1210 |
| 51035 | D03 | 54416 | 23566  | LPAR3    | 0.0496 | 1.1210 |
| 11053 | A05 | 2729  | 8942   | KYNU     | 0.0496 | 1.1210 |
| 11009 | F11 | 6008  | 113802 | C1orf59  | 0.0496 | 1.1211 |
| 51027 | F02 | 55625 | 10174  | SORBS3   | 0.0496 | 1.1211 |
| 11043 | C12 | 5650  | 7125   | TNNC2    | 0.0497 | 1.1213 |
| 11071 | D08 | 766   | 309    | ANXA6    | 0.0497 | 1.1214 |
| 11047 | B12 | 9536  | 5645   | PRSS2    | 0.0497 | 1.1214 |
| 11035 | E03 | 6372  | 7746   | ZNF193   | 0.0497 | 1.1214 |
| 11045 | B12 | 9396  | 26074  | C20orf26 | 0.0498 | 1.1214 |
| 11059 | E10 | 5423  | 8877   | SPHK1    | 0.0498 | 1.1214 |
| 11076 | H01 | 5770  | 10214  | SSX3     | 0.0498 | 1.1216 |
| 11076 | D05 | 4444  | 27339  | PRPF19   | 0.0498 | 1.1216 |
| 11043 | H01 | 4662  | 1153   | CIRBP    | 0.0499 | 1.1218 |
| 31001 | C09 | 10414 | 54585  | LZTFL1   | 0.0499 | 1.1218 |
| 11071 | E11 | 1547  | 85415  | RHPN2    | 0.0499 | 1.1219 |
| 11073 | E01 | 4227  | NA     | NA       | 0.0500 | 1.1219 |
| 11014 | A09 | 6828  | 22980  | TCF25    | 0.0500 | 1.1219 |
| 11049 | H11 | 794   | 132789 | GNPDA2   | 0.0500 | 1.1220 |
| 11054 | F04 | 5821  | 113829 | SLC35A4  | 0.0500 | 1.1220 |
| 51012 | F03 | 53942 | 5966   | REL      | 0.0500 | 1.1220 |
| 51011 | G11 | 53766 | 55958  | KLHL9    | 0.0500 | 1.1221 |
| 11032 | B04 | 8348  | 27295  | PDLIM3   | 0.0501 | 1.1222 |
| 51034 | H01 | 55080 | 440200 | FLJ41170 | 0.0501 | 1.1223 |
| 51029 | C07 | 56241 | 129804 | FBLN7    | 0.0501 | 1.1223 |
| 11059 | G09 | 5629  | 93474  | ZNF670   | 0.0501 | 1.1224 |
| 11022 | H03 | 8000  | 1615   | DARS     | 0.0502 | 1.1225 |
| 51025 | G08 | 56931 | 23272  | C3orf63  | 0.0502 | 1.1225 |
| 51001 | E01 | 52615 | 222659 | PXT1     | 0.0502 | 1.1225 |
| 51025 | E09 | 55681 | 23041  | MON2     | 0.0502 | 1.1225 |
| 11011 | F09 | 5766  | 84790  | TUBA1C   | 0.0502 | 1.1226 |
| 11069 | C02 | 2239  | 7188   | TRAF5    | 0.0502 | 1.1226 |
| 11034 | D08 | 1400  | 80310  | PDGFD    | 0.0502 | 1.1226 |
| 11012 | G10 | 5749  | 3493   | IGHA1    | 0.0502 | 1.1226 |
| 51005 | G09 | 54446 | 3394   | IRF8     | 0.0502 | 1.1227 |
| 11065 | B06 | 7508  | 814    | CAMK4    | 0.0503 | 1.1227 |
| 11047 | F02 | 4263  | 84759  | PCGF1    | 0.0503 | 1.1227 |
| 31043 | F08 | 7805  | 23457  | ABCB9    | 0.0503 | 1.1227 |
| 31009 | D01 | 11348 | 253143 | C22orf30 | 0.0503 | 1.1228 |
| 51023 | F03 | 56083 | 80201  | HKDC1    | 0.0503 | 1.1228 |
| 51027 | G11 | 55271 | 93643  | TJAP1    | 0.0503 | 1.1229 |
| 11034 | F04 | 1595  | 219333 | USP12    | 0.0504 | 1.1230 |
| 11069 | D09 | 8213  | 5236   | PGM1     | 0.0504 | 1.1231 |

|       |     |       |        |          |        |        |
|-------|-----|-------|--------|----------|--------|--------|
| 31008 | H02 | 11642 | 202051 | SPATA24  | 0.0504 | 1.1231 |
| 11013 | F04 | 7430  | 9948   | WDR1     | 0.0504 | 1.1231 |
| 11013 | H06 | 5069  | 56848  | SPHK2    | 0.0504 | 1.1232 |
| 31016 | A09 | 12524 | 11019  | LIAS     | 0.0505 | 1.1232 |
| 11011 | A09 | 2702  | 3872   | KRT17    | 0.0505 | 1.1233 |
| 11067 | D05 | 4363  | 84749  | USP30    | 0.0505 | 1.1233 |
| 11017 | A06 | 6519  | 5438   | POLR2I   | 0.0505 | 1.1234 |
| 31044 | A11 | 675   | 26575  | RGS17    | 0.0506 | 1.1234 |
| 31019 | C06 | 12981 | 119392 | C10orf78 | 0.0506 | 1.1234 |
| 51004 | A01 | 53996 | 55800  | SCN3B    | 0.0506 | 1.1235 |
| 51030 | E12 | 55482 | 8418   | CMAH     | 0.0506 | 1.1235 |
| 51001 | H02 | 53090 | 27230  | SERP1    | 0.0506 | 1.1235 |
| 51002 | A04 | 52606 | 340811 | AKR1CL1  | 0.0506 | 1.1235 |
| 31009 | F07 | 11790 | 7936   | RDBP     | 0.0506 | 1.1235 |
| 11073 | D04 | 4233  | 5757   | PTMA     | 0.0506 | 1.1235 |
| 51014 | D12 | 53103 | 168002 | DACT2    | 0.0506 | 1.1236 |
| 11010 | C05 | 150   | 5887   | RAD23B   | 0.0506 | 1.1236 |
| 11011 | A03 | 65    | 3875   | KRT18    | 0.0507 | 1.1237 |
| 51023 | G11 | 53638 | 3682   | ITGAE    | 0.0507 | 1.1238 |
| 11055 | B07 | 5019  | 26508  | HEYL     | 0.0507 | 1.1239 |
| 51011 | D12 | 52807 | 348807 | CCDC37   | 0.0507 | 1.1239 |
| 51013 | G09 | 53952 | 1549   | CYP2A7   | 0.0507 | 1.1239 |
| 11051 | F05 | 569   | 10950  | BTG3     | 0.0508 | 1.1241 |
| 51035 | H03 | 54040 | 23439  | ATP1B4   | 0.0508 | 1.1241 |
| 11068 | G06 | 960   | 5238   | PGM3     | 0.0508 | 1.1241 |
| 11058 | B05 | 4480  | 51100  | SH3GLB1  | 0.0508 | 1.1241 |
| 31006 | B07 | 11110 | 55138  | FAM90A1  | 0.0508 | 1.1242 |
| 51021 | G06 | 56801 | 116285 | ACSM1    | 0.0509 | 1.1242 |
| 51011 | G10 | 54262 | 93986  | FOXP2    | 0.0509 | 1.1243 |
| 11013 | A04 | 2529  | 140885 | SIRPA    | 0.0509 | 1.1243 |
| 31024 | B03 | 13412 | 89891  | WDR34    | 0.0509 | 1.1243 |
| 11034 | E03 | 3147  | 5603   | MAPK13   | 0.0509 | 1.1244 |
| 51028 | E03 | 56925 | 80727  | TTYH3    | 0.0510 | 1.1245 |
| 51010 | D10 | 52951 | 2051   | EPHB6    | 0.0510 | 1.1245 |
| 51027 | E09 | 53287 | 6506   | SLC1A2   | 0.0510 | 1.1245 |
| 31001 | H02 | 10552 | 91942  | NDUFAF2  | 0.0510 | 1.1247 |
| 11021 | F08 | 7944  | 8576   | STK16    | 0.0510 | 1.1247 |
| 11056 | D09 | 278   | 130589 | GALM     | 0.0510 | 1.1247 |
| 51025 | D02 | 56347 | 128239 | IQGAP3   | 0.0511 | 1.1248 |
| 31044 | A12 | 2465  | 30819  | KCNIP2   | 0.0511 | 1.1248 |
| 31005 | F02 | 11120 | 9274   | BCL7C    | 0.0511 | 1.1249 |
| 11073 | B06 | 4280  | 84262  | PSMG3    | 0.0511 | 1.1249 |
| 11010 | C03 | 401   | 26502  | NARF     | 0.0512 | 1.1250 |
| 11049 | C08 | 256   | 9445   | ITM2B    | 0.0512 | 1.1251 |

|       |     |       |        |          |        |        |
|-------|-----|-------|--------|----------|--------|--------|
| 11003 | B09 | 9005  | 1806   | DPYD     | 0.0512 | 1.1251 |
| 11085 | H03 | 4110  | 8764   | TNFRSF14 | 0.0512 | 1.1251 |
| 11079 | D04 | 2300  | 11069  | RAPGEF4  | 0.0512 | 1.1251 |
| 11043 | H02 | 5417  | 51060  | TXNDC12  | 0.0512 | 1.1252 |
| 31039 | E08 | 2721  | 29984  | RHOD     | 0.0512 | 1.1252 |
| 11081 | C10 | 9050  | 3840   | KPNA4    | 0.0512 | 1.1252 |
| 11047 | D04 | 3756  | 9217   | VAPB     | 0.0512 | 1.1252 |
| 11076 | G05 | 4376  | 80210  | ARMC9    | 0.0513 | 1.1253 |
| 11012 | A11 | 725   | 26065  | LSM14A   | 0.0513 | 1.1253 |
| 31001 | H10 | 10743 | 26716  | OR2H1    | 0.0513 | 1.1253 |
| 31021 | A07 | 12953 | 1188   | CLCNKB   | 0.0513 | 1.1255 |
| 51004 | D11 | 53909 | 27023  | FOXB1    | 0.0513 | 1.1255 |
| 51027 | H07 | 55691 | 115948 | CCDC151  | 0.0513 | 1.1255 |
| 51012 | F05 | 54471 | 55810  | FOXJ2    | 0.0513 | 1.1255 |
| 11067 | A10 | 7227  | 23657  | SLC7A11  | 0.0514 | 1.1256 |
| 11050 | B12 | 7083  | 115106 | HAUS1    | 0.0514 | 1.1256 |
| 11081 | F08 | 389   | 4504   | MT3      | 0.0514 | 1.1256 |
| 31014 | D01 | 11848 | 84458  | LCOR     | 0.0514 | 1.1256 |
| 31001 | D11 | 10452 | 254251 | LCORL    | 0.0514 | 1.1257 |
| 51011 | E09 | 53655 | 6534   | SLC6A7   | 0.0514 | 1.1258 |
| 11020 | A01 | 6729  | 27338  | UBE2S    | 0.0515 | 1.1258 |
| 11079 | F06 | 2513  | 5098   | PCDHGC3  | 0.0515 | 1.1258 |
| 51008 | H05 | 56891 | 199223 | TTC21A   | 0.0515 | 1.1259 |
| 11026 | B12 | 9250  | NA     | NA       | 0.0515 | 1.1259 |
| 51032 | F09 | 53385 | 542767 | PCOTH    | 0.0515 | 1.1259 |
| 11087 | E03 | 10159 | 79027  | ZNF655   | 0.0516 | 1.1260 |
| 11082 | B06 | 4087  | 28958  | CCDC56   | 0.0516 | 1.1260 |
| 51005 | F04 | 54219 | 23306  | TMEM194A | 0.0516 | 1.1261 |
| 11067 | D04 | 10069 | 23190  | UBXN4    | 0.0516 | 1.1261 |
| 51023 | D09 | 53571 | 3918   | LAMC2    | 0.0516 | 1.1261 |
| 11028 | C06 | 3972  | 11258  | DCTN3    | 0.0516 | 1.1261 |
| 11048 | G07 | 6555  | 58190  | CTDSP1   | 0.0516 | 1.1262 |
| 11063 | C05 | 7885  | 83637  | ZMIZ2    | 0.0516 | 1.1262 |
| 11016 | F08 | 7908  | 84247  | LDOC1L   | 0.0516 | 1.1262 |
| 31007 | G02 | 11222 | 406    | ARNTL    | 0.0517 | 1.1263 |
| 11053 | F08 | 6800  | 51011  | FAHD2A   | 0.0517 | 1.1264 |
| 51033 | D06 | 54140 | 84677  | DSCR8    | 0.0517 | 1.1264 |
| 11027 | E06 | 8371  | 4149   | MAX      | 0.0517 | 1.1265 |
| 11014 | C06 | 6129  | 823    | CAPN1    | 0.0517 | 1.1265 |
| 31031 | E11 | 14669 | 9913   | SUPT7L   | 0.0517 | 1.1265 |
| 11073 | C04 | 4418  | 56475  | RPRM     | 0.0518 | 1.1266 |
| 11069 | F07 | 9470  | 5187   | PER1     | 0.0518 | 1.1266 |
| 11082 | C03 | 4183  | 79160  | MGC4294  | 0.0518 | 1.1267 |
| 11064 | D06 | 2342  | 8454   | CUL1     | 0.0519 | 1.1268 |

|       |     |       |        |          |        |        |
|-------|-----|-------|--------|----------|--------|--------|
| 51021 | B04 | 56208 | 10500  | SEMA6C   | 0.0519 | 1.1268 |
| 31036 | F05 | 11619 | 6720   | SREBF1   | 0.0519 | 1.1269 |
| 51027 | E06 | 56232 | 57558  | USP35    | 0.0519 | 1.1269 |
| 11055 | C02 | 8327  | 9402   | GRAP2    | 0.0519 | 1.1269 |
| 31025 | C09 | 14057 | 85293  | KRTAP3-3 | 0.0519 | 1.1269 |
| 51028 | D02 | 56607 | 54657  | UGT1A4   | 0.0519 | 1.1269 |
| 11010 | F01 | 5711  | 28969  | BZW2     | 0.0519 | 1.1269 |
| 11018 | H10 | 6950  | 27350  | APOBEC3C | 0.0519 | 1.1270 |
| 11063 | H03 | 2389  | 55012  | PPP2R3C  | 0.0519 | 1.1270 |
| 11054 | E02 | 5097  | 55344  | PLCXD1   | 0.0519 | 1.1270 |
| 31003 | F12 | 10637 | 55553  | SOX6     | 0.0519 | 1.1270 |
| 11068 | D02 | 4112  | 26093  | CCDC9    | 0.0519 | 1.1270 |
| 11077 | A04 | 3833  | 3329   | HSPD1    | 0.0520 | 1.1271 |
| 51021 | A11 | 55863 | 133396 | IL31RA   | 0.0520 | 1.1272 |
| 51015 | H09 | 52977 | 150368 | FAM109B  | 0.0520 | 1.1272 |
| 11010 | F07 | 3811  | 10965  | ACOT2    | 0.0521 | 1.1274 |
| 11061 | E05 | 9989  | 28999  | KLF15    | 0.0521 | 1.1274 |
| 51025 | D03 | 56880 | 81792  | ADAMTS12 | 0.0521 | 1.1274 |
| 11058 | B04 | 2613  | 6820   | SULT2B1  | 0.0521 | 1.1274 |
| 11010 | B09 | 3549  | 23588  | KLHDC2   | 0.0521 | 1.1275 |
| 31035 | D01 | 14863 | 267    | AMFR     | 0.0521 | 1.1275 |
| 11002 | A03 | 390   | 84331  | FAM195A  | 0.0522 | 1.1276 |
| 11053 | D12 | 3305  | 8566   | PDXK     | 0.0522 | 1.1277 |
| 51021 | B09 | 55841 | 173    | AFM      | 0.0522 | 1.1277 |
| 51008 | A10 | 56346 | 9816   | URB2     | 0.0522 | 1.1278 |
| 11013 | B12 | 7936  | 10623  | POLR3C   | 0.0522 | 1.1278 |
| 11048 | G02 | 4274  | 1316   | KLF6     | 0.0523 | 1.1279 |
| 11063 | C04 | 7741  | 51185  | CRBN     | 0.0523 | 1.1280 |
| 11037 | F04 | 5348  | 207    | AKT1     | 0.0523 | 1.1281 |
| 11071 | A07 | 732   | 5894   | RAF1     | 0.0523 | 1.1281 |
| 31006 | D08 | 11115 | 10991  | SLC38A3  | 0.0524 | 1.1281 |
| 31018 | C06 | 13300 | 10092  | ARPC5    | 0.0524 | 1.1282 |
| 51016 | G07 | 56005 | NA     | NA       | 0.0524 | 1.1282 |
| 11068 | H04 | 7855  | 3431   | SP110    | 0.0524 | 1.1282 |
| 11039 | C01 | 7688  | 3707   | ITPKB    | 0.0524 | 1.1282 |
| 11057 | E08 | 9949  | 56265  | CPXM1    | 0.0524 | 1.1283 |
| 11020 | C06 | 5264  | 79640  | C22orf46 | 0.0525 | 1.1284 |
| 51028 | F08 | 55382 | 582    | BBS1     | 0.0525 | 1.1284 |
| 11059 | H05 | 4166  | 653361 | NCF1     | 0.0525 | 1.1285 |
| 11081 | B01 | 5054  | 54520  | CCDC93   | 0.0525 | 1.1285 |
| 51003 | F08 | 52929 | 149345 | SHISA4   | 0.0525 | 1.1285 |
| 11015 | F12 | 6383  | 10282  | BET1     | 0.0525 | 1.1286 |
| 11067 | C02 | 2631  | 10840  | ALDH1L1  | 0.0525 | 1.1286 |
| 11065 | B10 | 1133  | 2560   | GABRB1   | 0.0526 | 1.1286 |

|       |     |       |        |            |        |        |
|-------|-----|-------|--------|------------|--------|--------|
| 31039 | G10 | 489   | 9014   | TAF1B      | 0.0526 | 1.1287 |
| 31009 | E08 | 11366 | 375307 | C2orf62    | 0.0526 | 1.1287 |
| 11045 | A10 | 1532  | 143471 | PSMA8      | 0.0526 | 1.1287 |
| 11018 | B11 | 8859  | 7070   | THY1       | 0.0526 | 1.1287 |
| 11070 | B08 | 2448  | 2896   | GRN        | 0.0526 | 1.1287 |
| 31006 | G10 | 11186 | 84186  | ZCCHC7     | 0.0526 | 1.1289 |
| 11078 | G06 | 2496  | 7592   | ZNF41      | 0.0527 | 1.1289 |
| 31020 | D12 | 12910 | 91543  | RSAD2      | 0.0527 | 1.1290 |
| 11008 | B06 | 2793  | 728    | C5AR1      | 0.0527 | 1.1291 |
| 11070 | A10 | 7792  | 23650  | TRIM29     | 0.0528 | 1.1292 |
| 51034 | C03 | 53849 | 733    | C8G        | 0.0528 | 1.1293 |
| 11005 | H09 | 9332  | 143162 | FRMPD2     | 0.0528 | 1.1293 |
| 31021 | E09 | 12962 | 280    | AMY2B      | 0.0528 | 1.1293 |
| 11039 | G10 | 1508  | 64786  | TBC1D15    | 0.0528 | 1.1293 |
| 51015 | D01 | 52763 | 266747 | RGL4       | 0.0528 | 1.1293 |
| 31006 | D01 | 11207 | 55008  | HERC6      | 0.0529 | 1.1294 |
| 11064 | B08 | 3020  | 1123   | CHN1       | 0.0529 | 1.1294 |
| 11073 | G03 | 3922  | 6988   | TCTA       | 0.0529 | 1.1295 |
| 11079 | H11 | 1382  | 9728   | SECISBP2L  | 0.0529 | 1.1295 |
| 11015 | B12 | 5724  | 84833  | USMG5      | 0.0529 | 1.1296 |
| 51032 | C04 | 56749 | 1589   | CYP21A2    | 0.0529 | 1.1296 |
| 11001 | A03 | 2850  | 619434 | NCRNA00051 | 0.0529 | 1.1296 |
| 11043 | G01 | 157   | 7555   | CNBP       | 0.0529 | 1.1296 |
| 11009 | D11 | 434   | 84324  | SARNP      | 0.0530 | 1.1297 |
| 11013 | F01 | 1472  | 153745 | FAM71B     | 0.0530 | 1.1297 |
| 31018 | A07 | 12964 | 134492 | NUDCD2     | 0.0530 | 1.1297 |
| 11008 | C08 | 742   | 9456   | HOMER1     | 0.0530 | 1.1297 |
| 51025 | D05 | 55703 | 672    | BRCA1      | 0.0530 | 1.1298 |
| 51006 | F06 | 53181 | 84227  | RGSL2      | 0.0530 | 1.1298 |
| 11047 | A07 | 2288  | 1745   | DLX1       | 0.0530 | 1.1298 |
| 31001 | E07 | 10343 | 58191  | CXCL16     | 0.0530 | 1.1298 |
| 11053 | H09 | 5956  | 10495  | ENOX2      | 0.0530 | 1.1299 |
| 11026 | F07 | 2617  | 11102  | RPP14      | 0.0530 | 1.1299 |
| 31036 | C04 | 10832 | 222194 | RSBN1L     | 0.0530 | 1.1299 |
| 11048 | C12 | 8929  | 93107  | KCNG4      | 0.0530 | 1.1299 |
| 11056 | H03 | 10117 | 283933 | ZNF843     | 0.0531 | 1.1301 |
| 11006 | D09 | 1373  | 6456   | SH3GL2     | 0.0531 | 1.1301 |
| 51012 | G07 | 52801 | 153129 | SLC38A9    | 0.0531 | 1.1301 |
| 51010 | G02 | 53646 | 1006   | CDH8       | 0.0532 | 1.1302 |
| 11045 | H09 | 406   | 112950 | MED8       | 0.0532 | 1.1302 |
| 31042 | G05 | 6989  | 220002 | CYBASC3    | 0.0532 | 1.1303 |
| 11074 | A04 | 8928  | 51078  | THAP4      | 0.0532 | 1.1303 |
| 51014 | F06 | 52927 | 2845   | GPR22      | 0.0532 | 1.1303 |
| 11075 | E04 | 1125  | 51501  | C11orf73   | 0.0532 | 1.1303 |



|       |     |       |        |          |        |        |
|-------|-----|-------|--------|----------|--------|--------|
| 51015 | C02 | 52839 | 29942  | PURG     | 0.0532 | 1.1304 |
| 51030 | C02 | 56911 | 144404 | TMEM120B | 0.0533 | 1.1305 |
| 51031 | E04 | 55584 | 79853  | TM4SF20  | 0.0533 | 1.1305 |
| 11045 | D08 | 368   | 55069  | C7orf42  | 0.0533 | 1.1306 |
| 31036 | F01 | 11188 | 55000  | TUG1     | 0.0533 | 1.1306 |
| 31044 | D10 | 1793  | 9338   | TCEAL1   | 0.0534 | 1.1308 |
| 11073 | F04 | 3768  | 8115   | TCL1A    | 0.0534 | 1.1309 |
| 11043 | C10 | 7323  | 5376   | PMP22    | 0.0534 | 1.1309 |
| 51009 | A03 | 54593 | 51291  | GMP      | 0.0534 | 1.1309 |
| 31009 | D06 | 11470 | 123355 | LRRC28   | 0.0534 | 1.1309 |
| 51012 | A09 | 52882 | 11181  | TREH     | 0.0535 | 1.1310 |
| 11074 | D08 | 1161  | 2257   | FGF12    | 0.0535 | 1.1312 |
| 11034 | E12 | 3699  | 7572   | ZNF24    | 0.0536 | 1.1313 |
| 51008 | E03 | 53460 | 846    | CASR     | 0.0536 | 1.1314 |
| 11060 | A10 | 931   | 22929  | SEPHS1   | 0.0536 | 1.1314 |
| 11056 | F03 | 8466  | 10140  | TOB1     | 0.0536 | 1.1314 |
| 51033 | C06 | 54080 | 170622 | COMMD6   | 0.0536 | 1.1314 |
| 11062 | E01 | 7123  | 4093   | SMAD9    | 0.0536 | 1.1314 |
| 11070 | H05 | 7203  | 84861  | KLHL22   | 0.0536 | 1.1315 |
| 11046 | F01 | 4604  | 65987  | KCTD14   | 0.0537 | 1.1315 |
| 31019 | C09 | 13036 | 493911 | PHOSPHO2 | 0.0537 | 1.1316 |
| 11064 | H10 | 7215  | 190    | NR0B1    | 0.0537 | 1.1316 |
| 51024 | B09 | 55173 | 255631 | COL24A1  | 0.0537 | 1.1316 |
| 31010 | D05 | 11610 | 83450  | LRRC48   | 0.0537 | 1.1316 |
| 11086 | D11 | 1886  | 133121 | ENPP6    | 0.0537 | 1.1317 |
| 51002 | B03 | 54770 | 645010 | FLJ16126 | 0.0538 | 1.1318 |
| 11070 | G01 | 244   | 9817   | KEAP1    | 0.0538 | 1.1318 |
| 11044 | C08 | 5021  | 84769  | MPV17L2  | 0.0538 | 1.1318 |
| 11007 | F09 | 7564  | 57097  | PARP11   | 0.0538 | 1.1319 |
| 11053 | B05 | 5269  | 29115  | SAP30BP  | 0.0538 | 1.1319 |
| 11065 | C05 | 2163  | 51175  | TUBE1    | 0.0539 | 1.1320 |
| 11059 | F07 | 5798  | 55     | ACPP     | 0.0539 | 1.1321 |
| 11035 | C01 | 3690  | 51400  | PPME1    | 0.0539 | 1.1321 |
| 31017 | B08 | 13055 | 29034  | CPS1IT1  | 0.0539 | 1.1322 |
| 11054 | D08 | 7062  | 826    | CAPNS1   | 0.0539 | 1.1322 |
| 11045 | G02 | 8683  | 2972   | BRF1     | 0.0540 | 1.1323 |
| 51011 | B11 | 54846 | 133746 | JMY      | 0.0540 | 1.1323 |
| 11077 | C02 | 3016  | 51062  | ATL1     | 0.0540 | 1.1323 |
| 11015 | A04 | 9003  | 6789   | STK4     | 0.0540 | 1.1323 |
| 31013 | E05 | 12251 | 5602   | MAPK10   | 0.0540 | 1.1324 |
| 11053 | B02 | 4401  | 54093  | SETD4    | 0.0540 | 1.1324 |
| 11065 | D07 | 4157  | 55063  | ZCWPW1   | 0.0540 | 1.1324 |
| 11009 | E08 | 8751  | 54828  | BCAS3    | 0.0541 | 1.1326 |
| 31034 | A04 | 14990 | 55687  | TRMU     | 0.0541 | 1.1326 |

|       |     |       |        |         |        |        |
|-------|-----|-------|--------|---------|--------|--------|
| 11007 | C07 | 6378  | 51528  | JKAMP   | 0.0541 | 1.1326 |
| 31038 | E08 | 4716  | 9741   | LAPTM4A | 0.0541 | 1.1327 |
| 11070 | B06 | 4946  | 5798   | PTPRN   | 0.0541 | 1.1327 |
| 11077 | B06 | 1596  | 80321  | CEP70   | 0.0541 | 1.1327 |
| 31033 | C03 | 14813 | 140886 | PABPC5  | 0.0541 | 1.1327 |
| 31008 | C05 | 11741 | 84268  | RPAIN   | 0.0541 | 1.1328 |
| 11073 | G05 | 8902  | 3910   | LAMA4   | 0.0541 | 1.1328 |
| 11045 | C04 | 8897  | 64781  | CERK    | 0.0542 | 1.1328 |
| 31016 | F08 | 12535 | 11277  | TREX1   | 0.0543 | 1.1331 |
| 51027 | A03 | 53168 | 9108   | MTMR7   | 0.0543 | 1.1331 |
| 11064 | A02 | 7599  | 125170 | SMCR7   | 0.0543 | 1.1332 |
| 11046 | A11 | 4758  | 64785  | GINS3   | 0.0543 | 1.1332 |
| 11022 | E08 | 7358  | 64969  | MRPS5   | 0.0543 | 1.1332 |
| 11051 | A12 | 6123  | 23016  | EXOSC7  | 0.0543 | 1.1333 |
| 31017 | C03 | 12653 | 10667  | FARS2   | 0.0543 | 1.1333 |
| 31016 | D12 | 12407 | 51466  | EVL     | 0.0544 | 1.1333 |
| 31042 | E05 | 6456  | 51009  | DERL2   | 0.0544 | 1.1334 |
| 11084 | A02 | 1009  | 25796  | PGLS    | 0.0544 | 1.1334 |
| 11006 | G02 | 8513  | 496    | ATP4B   | 0.0544 | 1.1334 |
| 11029 | A12 | 1239  | 84945  | ABHD13  | 0.0544 | 1.1334 |
| 11065 | H05 | 5398  | 6470   | SHMT1   | 0.0544 | 1.1335 |
| 31043 | F05 | 7781  | 10480  | EIF3M   | 0.0544 | 1.1335 |
| 51014 | H11 | 53001 | 27159  | CHIA    | 0.0544 | 1.1335 |
| 11028 | B06 | 2638  | 93109  | TMEM44  | 0.0544 | 1.1335 |
| 11014 | C04 | 158   | 322    | APBB1   | 0.0544 | 1.1336 |
| 11032 | B06 | 6627  | 132001 | C3orf31 | 0.0545 | 1.1336 |
| 51011 | F02 | 53033 | 139221 | MUM1L1  | 0.0545 | 1.1337 |
| 11047 | H01 | 9932  | 378108 | TRIM74  | 0.0545 | 1.1337 |
| 11051 | D02 | 2552  | 51633  | OTUD6B  | 0.0545 | 1.1337 |
| 51016 | E05 | 56310 | NA     | NA      | 0.0545 | 1.1337 |
| 11005 | E05 | 10079 | 7171   | TPM4    | 0.0545 | 1.1338 |
| 31015 | E04 | 12717 | 8896   | BUD31   | 0.0545 | 1.1338 |
| 11017 | D06 | 6898  | 55273  | TMEM100 | 0.0545 | 1.1338 |
| 31026 | A05 | 13829 | 90427  | BMF     | 0.0545 | 1.1338 |
| 11011 | D11 | 3455  | 2625   | GATA3   | 0.0545 | 1.1338 |
| 51030 | G06 | 6750  | 9374   | PPT2    | 0.0546 | 1.1339 |
| 11088 | B03 | 9660  | 157378 | TMEM65  | 0.0546 | 1.1339 |
| 11011 | A12 | 109   | 10474  | TADA3   | 0.0546 | 1.1340 |
| 11010 | F10 | 6772  | 1267   | CNP     | 0.0546 | 1.1340 |
| 11068 | G01 | 5106  | 7695   | ZNF136  | 0.0546 | 1.1341 |
| 11058 | E01 | 8431  | 10164  | CHST4   | 0.0546 | 1.1341 |
| 11007 | E04 | 5720  | 8666   | EIF3G   | 0.0547 | 1.1341 |
| 11041 | B09 | 2526  | 10572  | SIVA1   | 0.0547 | 1.1342 |
| 11086 | A06 | 3627  | 6241   | RRM2    | 0.0547 | 1.1342 |

|       |     |       |        |           |        |        |
|-------|-----|-------|--------|-----------|--------|--------|
| 11062 | A11 | 8472  | 54474  | KRT20     | 0.0547 | 1.1342 |
| 11029 | B02 | 3609  | 379    | ARL4D     | 0.0547 | 1.1342 |
| 51027 | G07 | 56919 | 2099   | ESR1      | 0.0547 | 1.1343 |
| 11008 | F09 | 5828  | 3105   | HLA-A     | 0.0547 | 1.1343 |
| 11011 | C10 | 4128  | 25771  | TBC1D22A  | 0.0548 | 1.1344 |
| 31015 | C03 | 12712 | 83608  | C18orf21  | 0.0548 | 1.1344 |
| 31033 | D05 | 14699 | 10025  | MED16     | 0.0548 | 1.1344 |
| 51006 | D03 | 55291 | 57140  | RNPEPL1   | 0.0548 | 1.1345 |
| 31045 | E02 | 756   | 6885   | MAP3K7    | 0.0548 | 1.1345 |
| 11064 | G03 | 2849  | 30001  | ERO1L     | 0.0548 | 1.1345 |
| 11003 | F03 | 6206  | 51228  | GLTP      | 0.0548 | 1.1346 |
| 31012 | B02 | 12046 | 23479  | ISCU      | 0.0549 | 1.1347 |
| 11022 | F04 | 7893  | 79816  | TLE6      | 0.0549 | 1.1347 |
| 51003 | H10 | 52786 | 441251 | SPDYE7P   | 0.0549 | 1.1348 |
| 51015 | B11 | 53076 | 283629 | TSSK4     | 0.0549 | 1.1348 |
| 11073 | E08 | 4583  | 808    | CALM3     | 0.0549 | 1.1349 |
| 11072 | E05 | 6873  | 7088   | TLE1      | 0.0550 | 1.1349 |
| 11037 | G10 | 5215  | 1690   | COCH      | 0.0550 | 1.1349 |
| 51014 | B09 | 52759 | 266629 | SEC14L3   | 0.0550 | 1.1349 |
| 11053 | F06 | 4864  | 55313  | CPPED1    | 0.0550 | 1.1349 |
| 31010 | D07 | 11459 | 28982  | FLVCR1    | 0.0550 | 1.1350 |
| 11018 | D11 | 7157  | 23704  | KCNE4     | 0.0550 | 1.1351 |
| 51022 | E11 | 55929 | 10461  | MERTK     | 0.0550 | 1.1351 |
| 11042 | G06 | 2612  | 7069   | THRSP     | 0.0551 | 1.1352 |
| 11007 | A11 | 6693  | 51070  | NOSIP     | 0.0551 | 1.1353 |
| 11007 | G01 | 3330  | 10987  | COPS5     | 0.0551 | 1.1353 |
| 11039 | F07 | 6813  | 9925   | ZBTB5     | 0.0551 | 1.1353 |
| 11055 | C01 | 4258  | 10066  | SCAMP2    | 0.0551 | 1.1353 |
| 11076 | H07 | 344   | 5019   | OXCT1     | 0.0551 | 1.1354 |
| 11011 | C03 | 7938  | 2639   | GCDH      | 0.0551 | 1.1354 |
| 51028 | G03 | 53266 | 25940  | FAM98A    | 0.0552 | 1.1354 |
| 51013 | E06 | 53120 | 140890 | SFRS12    | 0.0552 | 1.1355 |
| 51035 | G01 | 54601 | 911    | CD1C      | 0.0552 | 1.1355 |
| 31022 | A03 | 13516 | 56655  | POLE4     | 0.0552 | 1.1356 |
| 51030 | H10 | 54108 | 138649 | ANKRD19   | 0.0552 | 1.1356 |
| 11062 | D02 | 1510  | 86     | ACTL6A    | 0.0553 | 1.1357 |
| 51017 | H05 | 56148 | 859    | CAV3      | 0.0553 | 1.1357 |
| 11001 | H04 | 10188 | 160492 | IFLTD1    | 0.0553 | 1.1357 |
| 11040 | F02 | 1622  | 730094 | C16orf52  | 0.0553 | 1.1358 |
| 51034 | E05 | 54188 | 50856  | CLEC4A    | 0.0553 | 1.1358 |
| 11002 | F05 | 9734  | 9246   | UBE2L6    | 0.0553 | 1.1358 |
| 11060 | D09 | 1922  | 85457  | KIAA1737  | 0.0553 | 1.1358 |
| 11051 | B09 | 695   | 132200 | C3orf49   | 0.0553 | 1.1358 |
| 31008 | H11 | 11728 | 24141  | C20orf103 | 0.0553 | 1.1359 |

|       |     |       |        |           |        |        |
|-------|-----|-------|--------|-----------|--------|--------|
| 31015 | E12 | 12806 | 5756   | TWF1      | 0.0554 | 1.1360 |
| 11077 | H10 | 1397  | 5992   | RFX4      | 0.0554 | 1.1361 |
| 11077 | E11 | 8904  | 83706  | FERMT3    | 0.0554 | 1.1361 |
| 11018 | D12 | 6333  | 51374  | C2orf28   | 0.0554 | 1.1361 |
| 11082 | G07 | 7397  | 81853  | TMEM14B   | 0.0554 | 1.1361 |
| 11012 | C03 | 2996  | 30001  | ERO1L     | 0.0554 | 1.1362 |
| 11064 | D08 | 1598  | 8803   | SUCLA2    | 0.0555 | 1.1363 |
| 11013 | C10 | 1883  | 66036  | MTMR9     | 0.0555 | 1.1364 |
| 11047 | C02 | 174   | 1748   | DLX4      | 0.0555 | 1.1364 |
| 31015 | H05 | 12566 | 138716 | C9orf23   | 0.0555 | 1.1364 |
| 31002 | D05 | 10369 | 9805   | SCRN1     | 0.0556 | 1.1366 |
| 11043 | D11 | 5694  | 51187  | RSL24D1   | 0.0556 | 1.1366 |
| 11011 | B03 | 7054  | 50859  | SPOCK3    | 0.0556 | 1.1366 |
| 11018 | E08 | 6353  | 9527   | GOSR1     | 0.0556 | 1.1366 |
| 11022 | G09 | 3315  | 79087  | ALG12     | 0.0556 | 1.1366 |
| 31034 | E04 | 14994 | 6628   | SNRPB     | 0.0556 | 1.1366 |
| 51026 | B06 | 53160 | 55661  | DDX27     | 0.0556 | 1.1366 |
| 31004 | A03 | 10760 | 56916  | SMARCAD1  | 0.0556 | 1.1367 |
| 31033 | G11 | 14830 | 5204   | PFDN5     | 0.0557 | 1.1367 |
| 11046 | H03 | 744   | 79877  | DCAKD     | 0.0557 | 1.1367 |
| 11011 | H01 | 7648  | 10227  | MFSD10    | 0.0557 | 1.1367 |
| 11060 | F08 | 8326  | 3620   | IDO1      | 0.0557 | 1.1370 |
| 51025 | H06 | 53230 | 10734  | STAG3     | 0.0557 | 1.1370 |
| 51001 | E06 | 56475 | 153218 | SPINK13   | 0.0558 | 1.1370 |
| 11057 | F04 | 1911  | 9595   | CYTIP     | 0.0558 | 1.1371 |
| 51008 | B11 | 53679 | 3912   | LAMB1     | 0.0558 | 1.1372 |
| 11026 | G07 | 3121  | 10204  | NUTF2     | 0.0558 | 1.1372 |
| 51021 | B05 | 55722 | 150160 | CCT8L2    | 0.0559 | 1.1373 |
| 11015 | B02 | 5569  | 5619   | PRM1      | 0.0559 | 1.1373 |
| 31026 | H03 | 13871 | 64806  | IL25      | 0.0559 | 1.1373 |
| 31016 | C06 | 12539 | 79701  | C17orf101 | 0.0559 | 1.1373 |
| 11082 | F12 | 7336  | 8742   | TNFSF12   | 0.0559 | 1.1374 |
| 31020 | A04 | 13148 | 3082   | HGF       | 0.0559 | 1.1375 |
| 11048 | D09 | 630   | 23353  | SUN1      | 0.0559 | 1.1375 |
| 11006 | A07 | 6878  | 5692   | PSMB4     | 0.0560 | 1.1375 |
| 11077 | A02 | 8244  | 79891  | ZNF671    | 0.0560 | 1.1376 |
| 11066 | C09 | 689   | 64327  | LMBR1     | 0.0560 | 1.1377 |
| 31014 | A04 | 11884 | 169611 | OLFML2A   | 0.0560 | 1.1377 |
| 11076 | E12 | 1760  | 91392  | ZNF502    | 0.0560 | 1.1377 |
| 51017 | D03 | 56431 | 728276 | LOC728276 | 0.0560 | 1.1377 |
| 31022 | D06 | 13606 | 4814   | NINJ1     | 0.0561 | 1.1379 |
| 11048 | B06 | 2828  | 3117   | HLA-DQA1  | 0.0561 | 1.1380 |
| 51024 | D10 | 55152 | 4625   | MYH7      | 0.0561 | 1.1380 |
| 11011 | B08 | 3902  | 1173   | AP2M1     | 0.0561 | 1.1380 |

|       |     |       |        |          |        |        |
|-------|-----|-------|--------|----------|--------|--------|
| 11054 | E01 | 4862  | 7780   | SLC30A2  | 0.0562 | 1.1381 |
| 11008 | F08 | 7482  | 55343  | SLC35C1  | 0.0562 | 1.1382 |
| 11046 | H11 | 6609  | 80233  | C17orf70 | 0.0562 | 1.1382 |
| 11014 | C01 | 938   | 55632  | G2E3     | 0.0562 | 1.1382 |
| 31008 | B05 | 11673 | 5445   | PON2     | 0.0563 | 1.1383 |
| 51025 | F03 | 53317 | 23131  | GPATCH8  | 0.0563 | 1.1384 |
| 11089 | B04 | 9279  | 8778   | SIGLEC5  | 0.0563 | 1.1384 |
| 31007 | B08 | 11075 | 2185   | PTK2B    | 0.0563 | 1.1385 |
| 11002 | E07 | 9376  | 128821 | CST9L    | 0.0564 | 1.1386 |
| 11007 | H11 | 7980  | 5192   | PEX10    | 0.0564 | 1.1386 |
| 31013 | G05 | 12102 | 6342   | SCP2     | 0.0564 | 1.1387 |
| 31010 | A03 | 11685 | 2159   | F10      | 0.0564 | 1.1387 |
| 11007 | E11 | 7381  | 51571  | FAM49B   | 0.0564 | 1.1387 |
| 11067 | C10 | 8125  | 4752   | NEK3     | 0.0564 | 1.1388 |
| 11006 | G06 | 698   | 6187   | RPS2     | 0.0564 | 1.1388 |
| 11017 | C06 | 8019  | 8682   | PEA15    | 0.0565 | 1.1388 |
| 51022 | B02 | 55927 | 80824  | DUSP16   | 0.0565 | 1.1389 |
| 11088 | G07 | 319   | 55631  | LRRC40   | 0.0565 | 1.1389 |
| 11076 | C05 | 4152  | 23536  | ADAT1    | 0.0565 | 1.1389 |
| 31003 | H08 | 10667 | 5791   | PTPRE    | 0.0565 | 1.1389 |
| 11069 | B05 | 7905  | 79058  | ASPSCR1  | 0.0565 | 1.1390 |
| 11045 | F12 | 9123  | 55005  | RMND1    | 0.0565 | 1.1390 |
| 51008 | H04 | 53605 | 11180  | WDR6     | 0.0565 | 1.1390 |
| 11015 | D08 | 9176  | 56890  | MDM1     | 0.0565 | 1.1391 |
| 11016 | C02 | 6358  | 6275   | S100A4   | 0.0565 | 1.1391 |
| 31007 | C11 | 11433 | 2894   | GRID1    | 0.0566 | 1.1391 |
| 51003 | D12 | 54175 | 50674  | NEUROG3  | 0.0566 | 1.1392 |
| 31037 | C05 | 13543 | 126147 | NTN5     | 0.0566 | 1.1393 |
| 11013 | E09 | 2183  | 84258  | SYT3     | 0.0567 | 1.1394 |
| 31044 | G06 | 4388  | 79726  | WDR59    | 0.0567 | 1.1394 |
| 11046 | F03 | 4266  | 79652  | TMEM204  | 0.0567 | 1.1394 |
| 11062 | D11 | 10227 | 144811 | C13orf31 | 0.0567 | 1.1395 |
| 11067 | F06 | 7812  | 81704  | DOCK8    | 0.0568 | 1.1396 |
| 31011 | D08 | 12123 | 128977 | C22orf39 | 0.0568 | 1.1396 |
| 11013 | C06 | 974   | 79934  | ADCK4    | 0.0568 | 1.1397 |
| 11042 | F10 | 5649  | 9086   | EIF1AY   | 0.0568 | 1.1397 |
| 11075 | G06 | 8953  | 1639   | DCTN1    | 0.0568 | 1.1398 |
| 11045 | D11 | 1781  | 5872   | RAB13    | 0.0568 | 1.1398 |
| 11040 | F10 | 6601  | 57819  | LSM2     | 0.0568 | 1.1398 |
| 51029 | F06 | 55431 | 347732 | CATSPER3 | 0.0569 | 1.1399 |
| 51017 | C03 | 56655 | 5947   | RBP1     | 0.0569 | 1.1401 |
| 11045 | H10 | 694   | 3569   | IL6      | 0.0569 | 1.1401 |
| 11052 | G10 | 1779  | 157753 | TMEM74   | 0.0569 | 1.1401 |
| 11036 | A10 | 1018  | 83989  | FAM172A  | 0.0570 | 1.1401 |

|       |     |       |        |          |        |        |
|-------|-----|-------|--------|----------|--------|--------|
| 11069 | C04 | 9872  | 150160 | CCT8L2   | 0.0570 | 1.1402 |
| 11040 | G05 | 5691  | 201895 | C4orf34  | 0.0570 | 1.1402 |
| 11077 | A07 | 2559  | 2794   | GNL1     | 0.0570 | 1.1403 |
| 11086 | A07 | 6902  | 79188  | TMEM43   | 0.0570 | 1.1403 |
| 11040 | A04 | 8952  | NA     | NA       | 0.0570 | 1.1404 |
| 11060 | H05 | 3818  | 5705   | PSMC5    | 0.0571 | 1.1404 |
| 11001 | E11 | 10116 | 128061 | C1orf131 | 0.0571 | 1.1404 |
| 11085 | G05 | 4514  | 25818  | KLK5     | 0.0571 | 1.1405 |
| 51014 | C01 | 52699 | 114625 | ERMAP    | 0.0571 | 1.1406 |
| 11008 | E12 | 3143  | 9798   | KIAA0174 | 0.0571 | 1.1406 |
| 51035 | D06 | 53547 | 9334   | B4GALT5  | 0.0571 | 1.1406 |
| 11007 | F12 | 3721  | 11091  | WDR5     | 0.0572 | 1.1407 |
| 11054 | F02 | 8694  | 8621   | CDK13    | 0.0572 | 1.1407 |
| 11055 | E05 | 9249  | 160298 | C11orf42 | 0.0572 | 1.1408 |
| 31003 | F04 | 10797 | 283209 | PGM2L1   | 0.0572 | 1.1408 |
| 11053 | C05 | 9344  | 81628  | TSC22D4  | 0.0572 | 1.1409 |
| 11049 | C05 | 4940  | 10723  | SLC12A7  | 0.0573 | 1.1409 |
| 11051 | A06 | 5837  | 9686   | VGLL4    | 0.0573 | 1.1410 |
| 11034 | G03 | 7995  | 10171  | RCL1     | 0.0573 | 1.1411 |
| 11058 | A02 | 4768  | 100    | ADA      | 0.0573 | 1.1411 |
| 11005 | B12 | 8069  | 5271   | SERPINB8 | 0.0573 | 1.1411 |
| 51004 | B03 | 52660 | 375323 | LHFPL4   | 0.0573 | 1.1411 |
| 31039 | D08 | 1005  | 55625  | ZDHC7    | 0.0574 | 1.1412 |
| 11006 | C10 | 3374  | 54472  | TOLLIP   | 0.0574 | 1.1412 |
| 11049 | F05 | 1476  | 137392 | FAM92A1  | 0.0574 | 1.1413 |
| 11071 | C03 | 9887  | 150737 | TTC30B   | 0.0574 | 1.1413 |
| 11056 | G03 | 5574  | 1022   | CDK7     | 0.0574 | 1.1414 |
| 11014 | H11 | 2977  | 9862   | MED24    | 0.0574 | 1.1414 |
| 51011 | G05 | 53060 | 168850 | ZNF800   | 0.0574 | 1.1414 |
| 51014 | B12 | 53137 | 162417 | NAGS     | 0.0575 | 1.1414 |
| 51029 | D12 | 55446 | 9637   | FEZ2     | 0.0575 | 1.1415 |
| 11032 | G03 | 8229  | 131616 | TMEM42   | 0.0575 | 1.1415 |
| 31003 | H04 | 10652 | 25948  | KBTBD2   | 0.0575 | 1.1415 |
| 11064 | G05 | 4733  | 1112   | FOXN3    | 0.0576 | 1.1418 |
| 11071 | B05 | 1246  | 79738  | BBS10    | 0.0576 | 1.1418 |
| 31041 | E01 | 6604  | 91419  | XRCC6BP1 | 0.0576 | 1.1419 |
| 31039 | B06 | 8623  | 1871   | E2F3     | 0.0576 | 1.1419 |
| 31001 | H07 | 10495 | 128989 | C22orf25 | 0.0576 | 1.1419 |
| 51023 | D12 | 56236 | 90853  | SPOCD1   | 0.0576 | 1.1419 |
| 11062 | D09 | 9263  | 152404 | IGSF11   | 0.0576 | 1.1419 |
| 31045 | G07 | 8054  | 9688   | NUP93    | 0.0577 | 1.1420 |
| 11034 | A01 | 3963  | 55623  | THUMPDI  | 0.0577 | 1.1420 |
| 51026 | C01 | 56939 | 342357 | ZKSCAN2  | 0.0577 | 1.1420 |
| 11051 | G02 | 8921  | 3084   | NRG1     | 0.0577 | 1.1421 |

|       |     |       |        |           |        |        |
|-------|-----|-------|--------|-----------|--------|--------|
| 11042 | C07 | 5256  | 6155   | RPL27     | 0.0577 | 1.1421 |
| 11073 | E07 | 1581  | 131375 | LYZL4     | 0.0577 | 1.1422 |
| 11080 | F03 | 2483  | 2260   | FGFR1     | 0.0578 | 1.1423 |
| 31026 | E03 | 13786 | 1750   | DLX6      | 0.0578 | 1.1423 |
| 11084 | A09 | 3276  | 51081  | MRPS7     | 0.0578 | 1.1424 |
| 11067 | B06 | 7571  | 114818 | KLHL29    | 0.0578 | 1.1424 |
| 11054 | A08 | 88    | 134510 | UBLCP1    | 0.0578 | 1.1424 |
| 11034 | D10 | 3165  | 1819   | DRG2      | 0.0578 | 1.1424 |
| 31007 | B07 | 11271 | 26512  | INTS6     | 0.0578 | 1.1424 |
| 51022 | C10 | 55877 | 9152   | SLC6A5    | 0.0579 | 1.1425 |
| 31005 | D11 | 11014 | 122945 | C14orf148 | 0.0579 | 1.1425 |
| 11081 | H03 | 2527  | 401505 | TOMM5     | 0.0579 | 1.1426 |
| 11086 | H05 | 7621  | 8698   | S1PR4     | 0.0579 | 1.1427 |
| 51034 | A06 | 53835 | 91464  | ISX       | 0.0579 | 1.1427 |
| 11028 | B09 | 3545  | 51060  | TXNDC12   | 0.0580 | 1.1427 |
| 11018 | D09 | 3673  | 79177  | ZNF576    | 0.0580 | 1.1428 |
| 51023 | H09 | 54057 | 4604   | MYBPC1    | 0.0580 | 1.1429 |
| 11045 | F04 | 2315  | 402573 | C7orf61   | 0.0580 | 1.1429 |
| 31018 | H10 | 12931 | 113251 | LARP4     | 0.0580 | 1.1430 |
| 31014 | F03 | 12074 | 79589  | RNF128    | 0.0580 | 1.1430 |
| 31028 | F12 | 14338 | 81853  | TMEM14B   | 0.0581 | 1.1430 |
| 51034 | H05 | 55005 | 387496 | RASL11A   | 0.0581 | 1.1430 |
| 51023 | H08 | 56249 | 23426  | GRIP1     | 0.0581 | 1.1430 |
| 31037 | E07 | 13740 | 10036  | CHAF1A    | 0.0581 | 1.1431 |
| 11079 | E04 | 7169  | 25888  | ZNF473    | 0.0581 | 1.1431 |
| 51008 | F11 | 56291 | 9793   | CKAP5     | 0.0581 | 1.1432 |
| 11081 | C05 | 8654  | 6767   | ST13      | 0.0581 | 1.1432 |
| 31006 | C11 | 10908 | 154043 | CNKS3     | 0.0581 | 1.1432 |
| 11085 | C08 | 9428  | 9050   | PSTPIP2   | 0.0582 | 1.1433 |
| 11005 | D10 | 919   | 55161  | TMEM33    | 0.0582 | 1.1433 |
| 51026 | B08 | 55225 | 81844  | TRIM56    | 0.0582 | 1.1433 |
| 11013 | D11 | 8412  | 124935 | SLC43A2   | 0.0582 | 1.1433 |
| 31020 | E08 | 13070 | 361    | AQP4      | 0.0582 | 1.1433 |
| 51013 | E12 | 53877 | 7310   | ZRSR1     | 0.0582 | 1.1433 |
| 31005 | C01 | 11254 | 51503  | CWC15     | 0.0582 | 1.1433 |
| 51023 | D07 | 56215 | 3092   | HIP1      | 0.0583 | 1.1437 |
| 51011 | F11 | 52892 | 9248   | GPR50     | 0.0583 | 1.1437 |
| 11005 | F12 | 8264  | 123606 | NIPA1     | 0.0583 | 1.1437 |
| 11081 | A01 | 8855  | 10007  | GNPDA1    | 0.0583 | 1.1438 |
| 51024 | A11 | 54750 | 81704  | DOCK8     | 0.0584 | 1.1439 |
| 51035 | H07 | 53943 | 8718   | TNFRSF25  | 0.0584 | 1.1439 |
| 11074 | G06 | 5114  | 5865   | RAB3B     | 0.0584 | 1.1439 |
| 11083 | H08 | 7040  | 112817 | DHDPSL    | 0.0584 | 1.1440 |
| 31010 | F03 | 11362 | 57463  | AMIGO1    | 0.0585 | 1.1441 |

|       |     |       |        |          |        |        |
|-------|-----|-------|--------|----------|--------|--------|
| 11014 | D03 | 26    | 4670   | HNRNPM   | 0.0585 | 1.1442 |
| 11052 | E01 | 1923  | 7490   | WT1      | 0.0585 | 1.1442 |
| 11067 | C08 | 6840  | 92105  | INTS4    | 0.0585 | 1.1443 |
| 31042 | C06 | 7014  | 93323  | HAUS8    | 0.0585 | 1.1443 |
| 11064 | A10 | 4726  | 2030   | SLC29A1  | 0.0585 | 1.1443 |
| 11046 | G10 | 8723  | 129807 | NEU4     | 0.0586 | 1.1444 |
| 31043 | D04 | 6967  | 26872  | STEAP1   | 0.0586 | 1.1444 |
| 11002 | A04 | 10179 | 22858  | ICK      | 0.0586 | 1.1444 |
| 11013 | G10 | 2170  | 3306   | HSPA2    | 0.0586 | 1.1445 |
| 31034 | H02 | 14838 | 10144  | FAM13A   | 0.0586 | 1.1445 |
| 31044 | B09 | 2110  | 7141   | TNP1     | 0.0587 | 1.1446 |
| 11014 | G10 | 326   | 11060  | WWP2     | 0.0587 | 1.1448 |
| 11005 | C02 | 1807  | 79073  | TMEM109  | 0.0587 | 1.1448 |
| 11069 | E06 | 9390  | 132612 | ADAD1    | 0.0588 | 1.1449 |
| 31001 | D06 | 10672 | 353149 | TBC1D26  | 0.0588 | 1.1450 |
| 11013 | C12 | 8474  | 55867  | SLC22A11 | 0.0588 | 1.1450 |
| 11060 | H04 | 6480  | 1973   | EIF4A1   | 0.0588 | 1.1450 |
| 11077 | C06 | 3858  | 55174  | INTS10   | 0.0588 | 1.1451 |
| 11003 | C04 | 10192 | 54952  | TRNAU1AP | 0.0589 | 1.1452 |
| 11013 | D05 | 3812  | 29781  | NCAPH2   | 0.0589 | 1.1452 |
| 11071 | C06 | 498   | 123169 | LEO1     | 0.0589 | 1.1452 |
| 11063 | B10 | 5035  | 79944  | L2HGDH   | 0.0589 | 1.1452 |
| 11027 | C10 | 704   | 3046   | HBE1     | 0.0589 | 1.1452 |
| 11089 | D05 | 2139  | 414918 | FAM116B  | 0.0589 | 1.1453 |
| 51024 | F10 | 56284 | 4619   | MYH1     | 0.0589 | 1.1453 |
| 11063 | A05 | 97    | 392    | ARHGAP1  | 0.0590 | 1.1454 |
| 11068 | G03 | 2386  | 10276  | NET1     | 0.0590 | 1.1454 |
| 11045 | B03 | 452   | 29114  | TAGLN3   | 0.0590 | 1.1454 |
| 11071 | F04 | 1696  | 2982   | GUCY1A3  | 0.0590 | 1.1455 |
| 11012 | H01 | 3962  | 10946  | SF3A3    | 0.0590 | 1.1455 |
| 31003 | D02 | 10300 | 64651  | CSRNP1   | 0.0590 | 1.1456 |
| 31010 | B09 | 11536 | 169841 | ZNF169   | 0.0590 | 1.1456 |
| 31044 | F09 | 1107  | 116228 | FAM36A   | 0.0590 | 1.1456 |
| 11058 | E08 | 2372  | 84775  | ZNF607   | 0.0591 | 1.1457 |
| 31040 | G04 | 9683  | 64963  | MRPS11   | 0.0591 | 1.1457 |
| 11044 | F07 | 3084  | 3845   | KRAS     | 0.0591 | 1.1458 |
| 31018 | C11 | 12844 | 54819  | ZCCHC10  | 0.0591 | 1.1458 |
| 11042 | C04 | 2196  | 4149   | MAX      | 0.0591 | 1.1459 |
| 51005 | G02 | 54274 | 221391 | OPN5     | 0.0591 | 1.1459 |
| 31012 | H09 | 12303 | 92344  | GORAB    | 0.0591 | 1.1459 |
| 51006 | B12 | 53469 | 22864  | R3HDM2   | 0.0592 | 1.1459 |
| 11024 | B06 | 8352  | 83878  | USHBP1   | 0.0592 | 1.1460 |
| 11043 | B12 | 8893  | 825    | CAPN3    | 0.0592 | 1.1460 |
| 11081 | G08 | 3428  | 2787   | GNG5     | 0.0592 | 1.1460 |



|       |     |       |        |          |        |        |
|-------|-----|-------|--------|----------|--------|--------|
| 51026 | G04 | 56682 | 57673  | BEND3    | 0.0592 | 1.1460 |
| 11008 | H02 | 6224  | 8531   | CSDA     | 0.0592 | 1.1460 |
| 51005 | D12 | 54709 | 2570   | GABRR2   | 0.0592 | 1.1460 |
| 51023 | D01 | 56186 | 55959  | SULF2    | 0.0593 | 1.1462 |
| 51033 | G09 | 54075 | 128817 | CSTL1    | 0.0593 | 1.1462 |
| 11019 | E10 | 6427  | 6302   | TSPAN31  | 0.0593 | 1.1463 |
| 51002 | B10 | 52587 | 84639  | IL1F10   | 0.0593 | 1.1463 |
| 51025 | E04 | 56883 | 55206  | SBNO1    | 0.0593 | 1.1463 |
| 11056 | E10 | 486   | 10797  | MTHFD2   | 0.0593 | 1.1464 |
| 11047 | E07 | 4647  | 9470   | EIF4E2   | 0.0594 | 1.1465 |
| 51026 | B05 | 55707 | 57554  | LRRC7    | 0.0594 | 1.1465 |
| 31003 | F09 | 10527 | 257062 | TMEM146  | 0.0594 | 1.1466 |
| 51015 | A09 | 52672 | 56950  | SMYD2    | 0.0594 | 1.1466 |
| 11019 | B10 | 6314  | 51207  | DUSP13   | 0.0594 | 1.1466 |
| 11074 | G01 | 4406  | 5300   | PIN1     | 0.0594 | 1.1466 |
| 31044 | F12 | 8605  | 79664  | NARG2    | 0.0594 | 1.1467 |
| 51030 | H06 | 55283 | 5463   | POU6F1   | 0.0594 | 1.1467 |
| 31008 | A04 | 11539 | 653140 | C2orf84  | 0.0595 | 1.1467 |
| 31027 | A12 | 15045 | 6249   | CLIP1    | 0.0595 | 1.1468 |
| 11057 | F12 | 4091  | 7111   | TMOD1    | 0.0595 | 1.1469 |
| 11036 | A02 | 1522  | 55297  | CCDC91   | 0.0595 | 1.1469 |
| 51011 | E11 | 53009 | 3702   | ITK      | 0.0595 | 1.1469 |
| 51021 | E10 | 56813 | 57610  | RANBP10  | 0.0596 | 1.1470 |
| 51001 | A09 | 52569 | 2691   | GHRH     | 0.0596 | 1.1470 |
| 31037 | B03 | 12738 | 6926   | TBX3     | 0.0596 | 1.1471 |
| 11019 | G05 | 7398  | 140801 | RPL10L   | 0.0596 | 1.1471 |
| 11044 | C09 | 8693  | 79027  | ZNF655   | 0.0596 | 1.1471 |
| 31021 | C03 | 13205 | 54931  | RG9MTD1  | 0.0596 | 1.1472 |
| 11008 | F02 | 2803  | 3145   | HMBS     | 0.0596 | 1.1472 |
| 11067 | F04 | 1356  | 64064  | OXCT2    | 0.0597 | 1.1472 |
| 51010 | E02 | 53070 | NA     | NA       | 0.0597 | 1.1473 |
| 51028 | E10 | 56280 | 170572 | HTR3C    | 0.0597 | 1.1473 |
| 11015 | G10 | 9013  | 7957   | EPM2A    | 0.0597 | 1.1474 |
| 11030 | A01 | 7     | 8089   | YEATS4   | 0.0597 | 1.1475 |
| 31043 | G03 | 7762  | 64080  | RBKS     | 0.0598 | 1.1477 |
| 51024 | D09 | 53620 | 9743   | ARHGAP32 | 0.0598 | 1.1477 |
| 51034 | D07 | 55025 | 9473   | C1orf38  | 0.0598 | 1.1477 |
| 11002 | G03 | 5739  | 79133  | C20orf7  | 0.0598 | 1.1477 |
| 51029 | D03 | 55452 | 6517   | SLC2A4   | 0.0598 | 1.1477 |
| 31024 | C11 | 13426 | 55164  | SHQ1     | 0.0599 | 1.1478 |
| 11028 | C11 | 2340  | 114793 | FMNL2    | 0.0599 | 1.1479 |
| 51005 | H04 | 54204 | 124    | ADH1A    | 0.0600 | 1.1480 |
| 11012 | F06 | 8537  | 55716  | LMBR1L   | 0.0600 | 1.1480 |
| 11061 | H04 | 2074  | 219749 | ZNF25    | 0.0600 | 1.1481 |

|       |     |       |        |          |        |        |
|-------|-----|-------|--------|----------|--------|--------|
| 31002 | B05 | 10573 | 339779 | C2orf53  | 0.0600 | 1.1481 |
| 11026 | D07 | 9462  | 51738  | GHRL     | 0.0600 | 1.1482 |
| 11018 | D02 | 6345  | 8557   | TCAP     | 0.0600 | 1.1482 |
| 11007 | E07 | 5842  | 8644   | AKR1C3   | 0.0600 | 1.1482 |
| 11011 | A10 | 2920  | 2670   | GFAP     | 0.0600 | 1.1483 |
| 51027 | G03 | 53373 | 57794  | SF4      | 0.0601 | 1.1483 |
| 31021 | D04 | 12841 | 138199 | C9orf41  | 0.0601 | 1.1483 |
| 31017 | B07 | 12533 | 29967  | LRP12    | 0.0601 | 1.1485 |
| 11034 | F03 | 829   | 8460   | TPST1    | 0.0602 | 1.1486 |
| 31042 | F12 | 5847  | 3419   | IDH3A    | 0.0602 | 1.1487 |
| 31034 | C01 | 14941 | 8073   | PTP4A2   | 0.0602 | 1.1487 |
| 11089 | A02 | 1553  | 7288   | TULP2    | 0.0602 | 1.1487 |
| 11052 | E06 | 1928  | 143384 | C10orf46 | 0.0602 | 1.1487 |
| 11059 | H06 | 4756  | 51268  | PIPOX    | 0.0602 | 1.1488 |
| 11004 | A10 | 1723  | 150159 | NHEDC1   | 0.0602 | 1.1488 |
| 11020 | H04 | 3287  | 55092  | TMEM51   | 0.0603 | 1.1488 |
| 31008 | E08 | 11369 | 135138 | PACRG    | 0.0603 | 1.1489 |
| 51024 | B08 | 55206 | 22995  | CEP152   | 0.0603 | 1.1489 |
| 11034 | B04 | 986   | 23543  | RBM9     | 0.0603 | 1.1489 |
| 31019 | G08 | 13292 | 80896  | NPL      | 0.0603 | 1.1490 |
| 51028 | F06 | 55330 | 3856   | KRT8     | 0.0603 | 1.1490 |
| 11036 | E05 | 1688  | 51097  | SCCPDH   | 0.0603 | 1.1490 |
| 51035 | F05 | 54585 | 729230 | CCR2     | 0.0603 | 1.1490 |
| 31044 | B04 | 4303  | 10120  | ACTR1B   | 0.0604 | 1.1491 |
| 11055 | E09 | 7324  | 115330 | GPR146   | 0.0604 | 1.1492 |
| 11046 | E03 | 4192  | 6757   | SSX2     | 0.0604 | 1.1493 |
| 31037 | H09 | 14196 | 374875 | HSD11B1L | 0.0604 | 1.1493 |
| 51010 | F03 | 52984 | 10125  | RASGRP1  | 0.0604 | 1.1493 |
| 31020 | C02 | 13059 | 4973   | OLR1     | 0.0604 | 1.1493 |
| 11016 | D02 | 7768  | 83543  | AIF1L    | 0.0605 | 1.1494 |
| 31001 | A03 | 10298 | 122664 | TPPP2    | 0.0605 | 1.1495 |
| 11085 | F07 | 305   | 10953  | TOMM34   | 0.0605 | 1.1496 |
| 51020 | G07 | 56142 | 1024   | CDK8     | 0.0605 | 1.1496 |
| 11011 | D04 | 784   | 653121 | ZBTB8A   | 0.0606 | 1.1496 |
| 51011 | B04 | 53648 | 10716  | TBR1     | 0.0606 | 1.1497 |
| 11075 | F05 | 5463  | 25816  | TNFAIP8  | 0.0606 | 1.1497 |
| 11038 | A10 | 3361  | 25917  | THUMP3   | 0.0606 | 1.1497 |
| 31002 | B11 | 10380 | 160777 | CCDC60   | 0.0606 | 1.1497 |
| 51026 | E08 | 56480 | 94122  | SYTL5    | 0.0606 | 1.1497 |
| 11043 | C11 | 5511  | 10200  | MPHOSPH6 | 0.0606 | 1.1498 |
| 31020 | A02 | 13151 | 125228 | C18orf19 | 0.0607 | 1.1500 |
| 11018 | B06 | 3842  | 10728  | PTGES3   | 0.0608 | 1.1502 |
| 51031 | D09 | 56221 | NA     | NA       | 0.0608 | 1.1502 |
| 11058 | H06 | 6451  | 5157   | PDGFRL   | 0.0608 | 1.1503 |

|       |     |       |        |          |        |        |
|-------|-----|-------|--------|----------|--------|--------|
| 11014 | B10 | 201   | 9189   | ZBED1    | 0.0608 | 1.1503 |
| 51032 | E06 | 55321 | 79068  | FTO      | 0.0608 | 1.1503 |
| 31036 | H01 | 11091 | 9917   | FAM20B   | 0.0608 | 1.1503 |
| 11086 | D06 | 910   | 3421   | IDH3G    | 0.0608 | 1.1503 |
| 11044 | G11 | 3068  | 115265 | DDIT4L   | 0.0608 | 1.1503 |
| 11005 | H02 | 1992  | 84064  | HDHD2    | 0.0608 | 1.1503 |
| 11010 | D04 | 2722  | 27034  | ACAD8    | 0.0608 | 1.1504 |
| 31043 | E03 | 7404  | 120379 | PIH1D2   | 0.0609 | 1.1504 |
| 11003 | C11 | 5425  | 58526  | MID1IP1  | 0.0609 | 1.1504 |
| 51014 | D03 | 54529 | 136371 | ASB10    | 0.0609 | 1.1506 |
| 31044 | E09 | 1090  | 10158  | PDZK1IP1 | 0.0609 | 1.1506 |
| 31008 | B04 | 11505 | 916    | CD3E     | 0.0609 | 1.1506 |
| 31032 | D10 | 14821 | 7173   | TPO      | 0.0609 | 1.1506 |
| 31005 | H11 | 11258 | 6609   | SMPD1    | 0.0610 | 1.1507 |
| 11028 | H05 | 4703  | 6143   | RPL19    | 0.0610 | 1.1508 |
| 11082 | F02 | 2310  | NA     | NA       | 0.0610 | 1.1508 |
| 11070 | E06 | 10081 | 117178 | SSX2IP   | 0.0610 | 1.1509 |
| 51026 | F01 | 53263 | 22803  | XRN2     | 0.0610 | 1.1509 |
| 51001 | F12 | 53026 | 7349   | UCN      | 0.0610 | 1.1509 |
| 51030 | E04 | 55694 | NA     | NA       | 0.0610 | 1.1509 |
| 51014 | D06 | 52663 | 26140  | TTLL3    | 0.0611 | 1.1509 |
| 51005 | E11 | 55491 | 79894  | ZNF672   | 0.0611 | 1.1510 |
| 51013 | B06 | 52840 | 10849  | CD3EAP   | 0.0611 | 1.1511 |
| 31002 | F01 | 10796 | 2359   | FPR3     | 0.0611 | 1.1511 |
| 11070 | B01 | 6557  | 55072  | RNF31    | 0.0612 | 1.1513 |
| 11064 | D05 | 6901  | 10445  | MCRS1    | 0.0612 | 1.1513 |
| 51021 | F12 | 56642 | 79173  | C19orf57 | 0.0612 | 1.1514 |
| 51021 | A08 | 55848 | 26507  | CNNM1    | 0.0612 | 1.1514 |
| 11026 | E06 | 8798  | 5995   | RGR      | 0.0613 | 1.1516 |
| 31039 | A04 | 9512  | 51542  | VPS54    | 0.0613 | 1.1516 |
| 11001 | F04 | 654   | 4709   | NDUFB3   | 0.0613 | 1.1516 |
| 11063 | B03 | 4561  | 80301  | PLEKHO2  | 0.0613 | 1.1517 |
| 51028 | D09 | 54296 | 3860   | KRT13    | 0.0614 | 1.1517 |
| 11006 | B06 | 7973  | 9445   | ITM2B    | 0.0615 | 1.1520 |
| 11025 | B03 | 10145 | 8509   | NDST2    | 0.0615 | 1.1520 |
| 51025 | G11 | 55234 | 92521  | CYTSB    | 0.0615 | 1.1521 |
| 51023 | B05 | 56202 | 1434   | CSEIL    | 0.0615 | 1.1521 |
| 11049 | D04 | 4037  | 4316   | MMP7     | 0.0615 | 1.1521 |
| 11085 | A01 | 3272  | 4837   | NNMT     | 0.0616 | 1.1523 |
| 11062 | G07 | 2293  | 167359 | MGC42105 | 0.0616 | 1.1523 |
| 31008 | E04 | 11518 | 64284  | RAB17    | 0.0616 | 1.1523 |
| 11001 | A08 | 8748  | 10554  | AGPAT1   | 0.0616 | 1.1524 |
| 11002 | H08 | 10057 | 3198   | HOXA1    | 0.0616 | 1.1525 |
| 11007 | H01 | 5420  | 51635  | DHRS7    | 0.0616 | 1.1525 |

|       |     |       |        |           |        |        |
|-------|-----|-------|--------|-----------|--------|--------|
| 51033 | G03 | 55510 | 730441 | LOC730441 | 0.0617 | 1.1526 |
| 11079 | C03 | 7990  | 7272   | TTK       | 0.0617 | 1.1526 |
| 11002 | D11 | 9200  | 285154 | C2orf58   | 0.0617 | 1.1526 |
| 11014 | E11 | 1729  | 2891   | GRIA2     | 0.0617 | 1.1527 |
| 11052 | B05 | 3171  | 5824   | PEX19     | 0.0617 | 1.1527 |
| 51005 | C01 | 54139 | 348303 | SELV      | 0.0617 | 1.1527 |
| 11056 | G04 | 5983  | 6903   | TBCC      | 0.0617 | 1.1528 |
| 11081 | C02 | 9138  | 55679  | LIMS2     | 0.0618 | 1.1530 |
| 31019 | F02 | 13219 | 493869 | GPX8      | 0.0619 | 1.1531 |
| 11039 | A04 | 2579  | 64837  | KLC2      | 0.0619 | 1.1532 |
| 11066 | B01 | 1882  | 153396 | TMEM161B  | 0.0619 | 1.1532 |
| 11001 | A10 | 9786  | 90317  | ZNF616    | 0.0619 | 1.1533 |
| 31011 | F07 | 12374 | 51182  | HSPA14    | 0.0619 | 1.1533 |
| 11015 | G05 | 3814  | 55969  | C20orf24  | 0.0620 | 1.1534 |
| 11036 | E06 | 2143  | 51166  | AADAT     | 0.0620 | 1.1534 |
| 11003 | F05 | 6125  | 196383 | RILPL2    | 0.0620 | 1.1534 |
| 11077 | C09 | 8325  | 2811   | GP1BA     | 0.0620 | 1.1535 |
| 51032 | H02 | 56847 | 285636 | C5orf51   | 0.0620 | 1.1535 |
| 11056 | G05 | 8384  | 922    | CD5L      | 0.0620 | 1.1535 |
| 11072 | A05 | 8141  | 84708  | LNX1      | 0.0620 | 1.1536 |
| 11054 | H01 | 3841  | 8668   | EIF3I     | 0.0620 | 1.1536 |
| 51002 | C04 | 54991 | 401172 | FLJ33360  | 0.0621 | 1.1536 |
| 11043 | D09 | 4421  | 79001  | VKORC1    | 0.0621 | 1.1537 |
| 11005 | F06 | 1243  | 5621   | PRNP      | 0.0621 | 1.1538 |
| 31016 | A10 | 12460 | 4212   | MEIS2     | 0.0622 | 1.1539 |
| 11044 | A01 | 9129  | 5998   | RGS3      | 0.0622 | 1.1539 |
| 11054 | D12 | 2532  | 79873  | NUDT18    | 0.0622 | 1.1539 |
| 31009 | A03 | 11720 | 84866  | TMEM25    | 0.0622 | 1.1540 |
| 31008 | E03 | 11772 | 3093   | UBE2K     | 0.0622 | 1.1540 |
| 11076 | C07 | 3748  | 217    | ALDH2     | 0.0622 | 1.1541 |
| 51006 | E01 | 54290 | 136991 | ASZ1      | 0.0622 | 1.1541 |
| 11071 | D01 | 9687  | 5884   | RAD17     | 0.0622 | 1.1541 |
| 11051 | H06 | 1070  | 90268  | FAM105B   | 0.0622 | 1.1541 |
| 51013 | A04 | 52730 | 147948 | ZNF582    | 0.0623 | 1.1542 |
| 11066 | C05 | 8471  | 23646  | PLD3      | 0.0623 | 1.1543 |
| 31026 | F12 | 13900 | 1948   | EFNB2     | 0.0623 | 1.1543 |
| 11053 | D07 | 5088  | 3423   | IDS       | 0.0623 | 1.1543 |
| 51023 | F11 | 54183 | 5332   | PLCB4     | 0.0623 | 1.1543 |
| 31010 | C03 | 11719 | 9068   | ANGPTL1   | 0.0623 | 1.1543 |
| 11005 | D01 | 2563  | 2258   | FGF13     | 0.0623 | 1.1543 |
| 11079 | B06 | 3215  | 9747   | FAM115A   | 0.0623 | 1.1543 |
| 11072 | H06 | 2316  | 5298   | PI4KB     | 0.0624 | 1.1544 |
| 51033 | H04 | 53630 | 84560  | MT4       | 0.0624 | 1.1545 |
| 11026 | B06 | 2808  | 6357   | CCL13     | 0.0624 | 1.1545 |

|       |     |       |        |          |        |        |
|-------|-----|-------|--------|----------|--------|--------|
| 31027 | B11 | 15036 | 753    | C18orf1  | 0.0624 | 1.1545 |
| 11079 | A02 | 3032  | 9787   | DLGAP5   | 0.0624 | 1.1545 |
| 11017 | H05 | 8829  | 9589   | WTAP     | 0.0624 | 1.1545 |
| 31014 | B06 | 12271 | NA     | NA       | 0.0624 | 1.1546 |
| 11009 | C04 | 6769  | 29956  | LASS2    | 0.0625 | 1.1547 |
| 51003 | G01 | 54952 | 399886 | FLJ41423 | 0.0625 | 1.1547 |
| 31033 | E01 | 14754 | 4035   | LRP1     | 0.0625 | 1.1547 |
| 51001 | D11 | 52662 | 169200 | TMEM64   | 0.0625 | 1.1547 |
| 11014 | G03 | 758   | 10312  | TCIRG1   | 0.0625 | 1.1548 |
| 11050 | A02 | 4199  | 27292  | DIMT1L   | 0.0625 | 1.1548 |
| 11019 | C03 | 6592  | 57132  | CHMP1B   | 0.0625 | 1.1549 |
| 31017 | B03 | 12730 | 9489   | PGS1     | 0.0626 | 1.1549 |
| 11063 | B11 | 5045  | 5360   | PLTP     | 0.0626 | 1.1550 |
| 11058 | C02 | 4942  | 3623   | INHA     | 0.0626 | 1.1550 |
| 51027 | B02 | 56810 | 9846   | GAB2     | 0.0626 | 1.1550 |
| 51014 | F07 | 52765 | 166785 | MMAA     | 0.0626 | 1.1550 |
| 51030 | B02 | 53213 | 392307 | C9orf128 | 0.0626 | 1.1551 |
| 11027 | D04 | 8757  | 53833  | IL20RB   | 0.0626 | 1.1551 |
| 11029 | C07 | 4707  | 4085   | MAD2L1   | 0.0626 | 1.1552 |
| 11048 | H05 | 5205  | 6689   | SPIB     | 0.0627 | 1.1553 |
| 11005 | H08 | 1096  | 3927   | LASP1    | 0.0627 | 1.1554 |
| 31006 | C02 | 11270 | 10062  | NR1H3    | 0.0628 | 1.1555 |
| 31036 | C11 | 12506 | 257019 | FRMD3    | 0.0628 | 1.1556 |
| 11070 | A11 | 2261  | 29979  | UBQLN1   | 0.0628 | 1.1557 |
| 51002 | B11 | 52634 | 339302 | CPLX4    | 0.0628 | 1.1557 |
| 11051 | E08 | 332   | 3921   | RPSA     | 0.0629 | 1.1559 |
| 11010 | H03 | 682   | 8436   | SDPR     | 0.0629 | 1.1559 |
| 11050 | F05 | 802   | 51105  | PHF20L1  | 0.0630 | 1.1560 |
| 31022 | B08 | 13347 | 219938 | SPATA19  | 0.0630 | 1.1561 |
| 11060 | D04 | 8049  | 53637  | S1PR5    | 0.0630 | 1.1561 |
| 31042 | C12 | 5083  | 84306  | PDCD2L   | 0.0630 | 1.1561 |
| 31042 | H05 | 6703  | 23399  | DULLARD  | 0.0630 | 1.1561 |
| 31044 | D12 | 2435  | 10212  | DDX39    | 0.0630 | 1.1562 |
| 11064 | G01 | 5092  | 1198   | CLK3     | 0.0630 | 1.1562 |
| 31018 | G01 | 13195 | 5930   | RBBP6    | 0.0631 | 1.1563 |
| 11056 | E02 | 433   | 7737   | RNF113A  | 0.0631 | 1.1564 |
| 51032 | E09 | 56416 | 400696 | LGALS17A | 0.0631 | 1.1565 |
| 51031 | D08 | 53368 | 25950  | RWDD3    | 0.0631 | 1.1565 |
| 31012 | E02 | 12089 | 10542  | HBXIP    | 0.0631 | 1.1565 |
| 11069 | A06 | 359   | 875    | CBS      | 0.0632 | 1.1565 |
| 11084 | C05 | 4836  | 57414  | RHBDD2   | 0.0632 | 1.1566 |
| 11054 | A01 | 2446  | 10399  | GNB2L1   | 0.0632 | 1.1567 |
| 51028 | A10 | 55307 | 63898  | SH2D4A   | 0.0632 | 1.1567 |
| 11051 | H10 | 904   | 509    | ATP5C1   | 0.0632 | 1.1567 |

|       |     |       |        |            |        |        |
|-------|-----|-------|--------|------------|--------|--------|
| 11013 | B01 | 2347  | 3839   | KPNA3      | 0.0633 | 1.1568 |
| 11066 | C03 | 7612  | 122618 | PLD4       | 0.0633 | 1.1569 |
| 51025 | G01 | 56294 | 8826   | IQGAPI     | 0.0633 | 1.1569 |
| 31002 | B04 | 10548 | 7881   | KCNAB1     | 0.0633 | 1.1569 |
| 31015 | D06 | 12553 | 26127  | FGFR1OP2   | 0.0633 | 1.1569 |
| 51032 | H10 | 55284 | 728131 | RPS6P6     | 0.0633 | 1.1569 |
| 31039 | C10 | 2715  | 5536   | PPP5C      | 0.0633 | 1.1569 |
| 11070 | G08 | 267   | 84455  | EFCAB7     | 0.0633 | 1.1570 |
| 51014 | A02 | 53715 | 9628   | RGS6       | 0.0633 | 1.1570 |
| 31003 | C02 | 10461 | 168374 | ZNF92      | 0.0634 | 1.1571 |
| 11087 | E08 | 1978  | 8493   | PPM1D      | 0.0634 | 1.1572 |
| 11014 | H07 | 2948  | 57704  | GBA2       | 0.0634 | 1.1572 |
| 11037 | C10 | 6830  | 9721   | GPRIN2     | 0.0634 | 1.1572 |
| 11011 | E01 | 2711  | 2625   | GATA3      | 0.0634 | 1.1572 |
| 11076 | C02 | 4556  | 10439  | OLFM1      | 0.0635 | 1.1573 |
| 31043 | E09 | 7622  | 57147  | SCYL3      | 0.0635 | 1.1573 |
| 11064 | E07 | 5774  | 83540  | NUF2       | 0.0635 | 1.1574 |
| 11022 | D04 | 7309  | 90956  | ADCK2      | 0.0635 | 1.1574 |
| 11059 | F04 | 4510  | 53918  | PELO       | 0.0635 | 1.1574 |
| 51021 | E06 | 56166 | 8317   | CDC7       | 0.0635 | 1.1575 |
| 11047 | F08 | 6815  | 79734  | KCTD17     | 0.0635 | 1.1576 |
| 11055 | D12 | 8886  | 2065   | ERBB3      | 0.0636 | 1.1577 |
| 11056 | A06 | 1484  | 84224  | NBPF3      | 0.0636 | 1.1578 |
| 11035 | G02 | 3453  | 10540  | DCTN2      | 0.0636 | 1.1578 |
| 11032 | F02 | 8643  | 1297   | COL9A1     | 0.0637 | 1.1578 |
| 51002 | B09 | 54624 | 257357 | NCRNA00257 | 0.0637 | 1.1579 |
| 11044 | A07 | 5737  | 2512   | FTL        | 0.0638 | 1.1581 |
| 11037 | A10 | 7977  | 5118   | PCOLCE     | 0.0638 | 1.1581 |
| 11076 | F03 | 3822  | 55355  | HJURP      | 0.0638 | 1.1583 |
| 11067 | B11 | 7827  | 57104  | PNPLA2     | 0.0638 | 1.1583 |
| 51012 | C11 | 55119 | 113612 | CYP2U1     | 0.0639 | 1.1585 |
| 11068 | B06 | 9654  | 221188 | GPR114     | 0.0639 | 1.1585 |
| 11087 | B08 | 2963  | 5347   | PLK1       | 0.0639 | 1.1586 |
| 11034 | C02 | 3449  | 29925  | GMPPB      | 0.0639 | 1.1586 |
| 11043 | C03 | 8282  | 153328 | SLC25A48   | 0.0639 | 1.1586 |
| 11053 | D06 | 4305  | 80775  | TMEM177    | 0.0639 | 1.1586 |
| 51032 | B08 | 56439 | 9220   | TIAF1      | 0.0640 | 1.1586 |
| 11004 | C07 | 3102  | 51661  | FKBP7      | 0.0640 | 1.1587 |
| 11059 | E07 | 6819  | 11135  | CDC42EP1   | 0.0640 | 1.1587 |
| 51009 | E02 | 52972 | 57828  | CATSPERG   | 0.0640 | 1.1588 |
| 11046 | A07 | 6684  | 539    | ATP5O      | 0.0640 | 1.1588 |
| 11011 | E02 | 4567  | 10948  | STARD3     | 0.0640 | 1.1588 |
| 11071 | E08 | 9665  | 152579 | SCFD2      | 0.0640 | 1.1588 |
| 31023 | E01 | 13449 | 81888  | HYI        | 0.0640 | 1.1588 |

|       |     |       |        |          |        |        |
|-------|-----|-------|--------|----------|--------|--------|
| 11050 | F04 | 386   | 6770   | STAR     | 0.0640 | 1.1588 |
| 31002 | F03 | 10416 | 5270   | SERPINE2 | 0.0640 | 1.1588 |
| 11028 | C07 | 6096  | 4358   | MPV17    | 0.0640 | 1.1589 |
| 11076 | F05 | 4784  | 23438  | HARS2    | 0.0641 | 1.1589 |
| 11034 | A09 | 6808  | 23770  | FKBP8    | 0.0641 | 1.1589 |
| 11047 | B05 | 4366  | 54926  | UBE2R2   | 0.0641 | 1.1590 |
| 31004 | B11 | 11226 | 91608  | RASL10B  | 0.0641 | 1.1590 |
| 11064 | E06 | 5316  | 84969  | TOX2     | 0.0641 | 1.1590 |
| 11080 | F12 | 9991  | 9726   | ZNF646   | 0.0641 | 1.1591 |
| 11011 | E05 | 6072  | 3646   | EIF3E    | 0.0641 | 1.1591 |
| 31039 | D07 | 3101  | 2014   | EMP3     | 0.0642 | 1.1592 |
| 11066 | H03 | 98    | 4205   | MEF2A    | 0.0642 | 1.1593 |
| 11032 | D05 | 7076  | 5501   | PPP1CC   | 0.0642 | 1.1593 |
| 11036 | H03 | 4018  | 5700   | PSMC1    | 0.0642 | 1.1593 |
| 11044 | D05 | 233   | 4237   | MFAP2    | 0.0643 | 1.1595 |
| 11055 | E10 | 535   | 2108   | ETFA     | 0.0643 | 1.1596 |
| 51031 | F12 | 55332 | 55337  | C19orf66 | 0.0643 | 1.1596 |
| 31031 | C05 | 14560 | 6997   | TDGF1    | 0.0643 | 1.1596 |
| 31031 | C03 | 14565 | 6504   | SLAMF1   | 0.0643 | 1.1597 |
| 11013 | B11 | 6632  | 25839  | COG4     | 0.0643 | 1.1597 |
| 51035 | C08 | 54640 | 200734 | SPRED2   | 0.0644 | 1.1599 |
| 51022 | E03 | 55728 | 2038   | EPB42    | 0.0644 | 1.1600 |
| 31037 | G05 | 14076 | 57152  | SLURP1   | 0.0645 | 1.1600 |
| 31040 | G05 | 9338  | 83734  | ATG10    | 0.0645 | 1.1601 |
| 51024 | E05 | 55150 | 27030  | MLH3     | 0.0645 | 1.1601 |
| 51008 | B02 | 54022 | 79595  | SAP130   | 0.0646 | 1.1603 |
| 31008 | A09 | 11344 | 11202  | KLK8     | 0.0646 | 1.1603 |
| 11050 | B01 | 6369  | 51319  | RSRC1    | 0.0646 | 1.1603 |
| 11022 | E10 | 6707  | 26086  | GPSM1    | 0.0646 | 1.1604 |
| 11069 | G09 | 4352  | 25930  | PTPN23   | 0.0646 | 1.1604 |
| 11056 | D08 | 6801  | 112942 | CCDC104  | 0.0646 | 1.1604 |
| 51027 | D09 | 53250 | 2530   | FUT8     | 0.0646 | 1.1604 |
| 51005 | B05 | 54903 | 3199   | HOXA2    | 0.0646 | 1.1604 |
| 31029 | D11 | 14418 | 400566 | C17orf97 | 0.0646 | 1.1604 |
| 11048 | B09 | 8560  | 84196  | USP48    | 0.0646 | 1.1604 |
| 11035 | H03 | 965   | 1974   | EIF4A2   | 0.0647 | 1.1605 |
| 51002 | D01 | 52901 | 283152 | CCDC153  | 0.0647 | 1.1606 |
| 11057 | G07 | 9327  | 7472   | WNT2     | 0.0647 | 1.1607 |
| 31004 | C05 | 11027 | 4009   | LMX1A    | 0.0647 | 1.1607 |
| 11064 | E05 | 4717  | 55165  | CEP55    | 0.0648 | 1.1608 |
| 31011 | F09 | 12402 | 9537   | TP53I11  | 0.0648 | 1.1609 |
| 11052 | B08 | 720   | 8771   | TNFRSF6B | 0.0648 | 1.1610 |
| 31042 | H11 | 4950  | 55248  | TMEM206  | 0.0648 | 1.1610 |
| 11014 | G06 | 1055  | 9392   | TGFBRAP1 | 0.0648 | 1.1610 |

|       |     |       |        |          |        |        |
|-------|-----|-------|--------|----------|--------|--------|
| 11059 | B02 | 8978  | 27161  | EIF2C2   | 0.0649 | 1.1611 |
| 11035 | D06 | 3394  | 51307  | FAM53C   | 0.0649 | 1.1611 |
| 11074 | G09 | 1381  | 55776  | C6orf64  | 0.0649 | 1.1611 |
| 11016 | A09 | 5659  | 171489 | SPANXE   | 0.0649 | 1.1612 |
| 11055 | D01 | 3788  | 5499   | PPP1CA   | 0.0649 | 1.1612 |
| 11059 | G03 | 1592  | 7781   | SLC30A3  | 0.0649 | 1.1613 |
| 11003 | E09 | 2107  | 83941  | TM2D1    | 0.0650 | 1.1613 |
| 11034 | D04 | 3373  | 5094   | PCBP2    | 0.0651 | 1.1616 |
| 51035 | D04 | 54582 | 134353 | LSM11    | 0.0651 | 1.1617 |
| 51027 | H08 | 56790 | 8785   | MATN4    | 0.0651 | 1.1618 |
| 11058 | C07 | 2115  | 63946  | DMRTC2   | 0.0651 | 1.1618 |
| 51033 | B05 | 54493 | 245936 | DEFB123  | 0.0651 | 1.1618 |
| 11036 | B11 | 6611  | 80146  | UXS1     | 0.0652 | 1.1619 |
| 11009 | E12 | 5939  | 54934  | C12orf41 | 0.0652 | 1.1620 |
| 11037 | A08 | 6943  | 55039  | TRMT12   | 0.0652 | 1.1620 |
| 51025 | B02 | 56884 | 23318  | ZCCHC11  | 0.0652 | 1.1621 |
| 11075 | C02 | 4232  | 5879   | RAC1     | 0.0652 | 1.1621 |
| 31026 | G08 | 13847 | 8074   | FGF23    | 0.0653 | 1.1622 |
| 31014 | C03 | 12349 | 51447  | IP6K2    | 0.0653 | 1.1622 |
| 11006 | H05 | 1427  | 2669   | GEM      | 0.0653 | 1.1623 |
| 11003 | D05 | 6263  | 81579  | PLA2G12A | 0.0653 | 1.1623 |
| 51032 | B01 | 11994 | 79752  | ZFAND1   | 0.0654 | 1.1625 |
| 11069 | C05 | 6508  | 131034 | CPNE4    | 0.0654 | 1.1626 |
| 11018 | D08 | 3452  | 29083  | GTPBP8   | 0.0654 | 1.1626 |
| 11063 | C10 | 3825  | 203068 | TUBB     | 0.0654 | 1.1626 |
| 11048 | G01 | 3950  | 761    | CA3      | 0.0655 | 1.1627 |
| 11056 | F01 | 3955  | 8702   | B4GALT4  | 0.0655 | 1.1627 |
| 11045 | E10 | 6586  | 90355  | C5orf30  | 0.0655 | 1.1628 |
| 11040 | F06 | 983   | 58515  | SELK     | 0.0655 | 1.1628 |
| 11002 | H05 | 5611  | 55312  | RFK      | 0.0655 | 1.1628 |
| 51002 | G04 | 55111 | NA     | NA       | 0.0655 | 1.1628 |
| 51016 | B04 | 55932 | 25859  | PART1    | 0.0655 | 1.1628 |
| 31007 | B01 | 10855 | 1820   | ARID3A   | 0.0655 | 1.1629 |
| 51022 | F06 | 56677 | 3320   | HSP90AA1 | 0.0655 | 1.1629 |
| 11022 | F03 | 9128  | 84196  | USP48    | 0.0656 | 1.1630 |
| 11084 | C03 | 2698  | 7165   | TPD52L2  | 0.0656 | 1.1632 |
| 51028 | G07 | 55443 | 55733  | HHAT     | 0.0656 | 1.1632 |
| 11040 | E09 | 7906  | 26520  | TIMM9    | 0.0657 | 1.1632 |
| 11076 | B06 | 9505  | 54531  | MIER2    | 0.0657 | 1.1633 |
| 11010 | A05 | 117   | 124583 | CANT1    | 0.0657 | 1.1634 |
| 11002 | G01 | 9508  | 282966 | C10orf53 | 0.0657 | 1.1634 |
| 11036 | C12 | 6376  | 6947   | TCN1     | 0.0657 | 1.1634 |
| 51034 | B03 | 53688 | 282616 | IL28A    | 0.0657 | 1.1634 |
| 51024 | F12 | 56299 | 779    | CACNA1S  | 0.0657 | 1.1634 |



|       |     |       |        |           |        |        |
|-------|-----|-------|--------|-----------|--------|--------|
| 11056 | D12 | 5945  | 29907  | SNX15     | 0.0658 | 1.1635 |
| 11083 | C05 | 8608  | 81831  | NETO2     | 0.0658 | 1.1636 |
| 11060 | B08 | 9219  | 165100 | C2orf57   | 0.0658 | 1.1637 |
| 31042 | D12 | 5970  | 57761  | TRIB3     | 0.0659 | 1.1638 |
| 51033 | G07 | 54169 | 149837 | LOC149837 | 0.0659 | 1.1638 |
| 51022 | A07 | 55867 | 10003  | NAALAD2   | 0.0659 | 1.1638 |
| 51004 | A02 | 55052 | 388284 | C16orf86  | 0.0659 | 1.1638 |
| 11079 | A11 | 2044  | 23039  | XPO7      | 0.0659 | 1.1639 |
| 11053 | H07 | 4225  | 10362  | HMG20B    | 0.0659 | 1.1639 |
| 51028 | H11 | 53322 | 5393   | EXOSC9    | 0.0659 | 1.1640 |
| 11074 | D05 | 1527  | 5535   | PPP3R2    | 0.0660 | 1.1640 |
| 51016 | F07 | 56738 | 151300 | LOC151300 | 0.0660 | 1.1640 |
| 51002 | E12 | 54706 | 440337 | LOC440337 | 0.0660 | 1.1641 |
| 11052 | E04 | 4294  | 79714  | CCDC51    | 0.0660 | 1.1641 |
| 51024 | E01 | 55146 | 8243   | SMC1A     | 0.0660 | 1.1642 |
| 51014 | A08 | 52777 | 285671 | RNF180    | 0.0661 | 1.1643 |
| 11051 | E03 | 4978  | 23567  | ZNF346    | 0.0661 | 1.1643 |
| 51006 | A08 | 53471 | 7586   | ZKSCAN1   | 0.0661 | 1.1643 |
| 11076 | D01 | 5585  | 1410   | CRYAB     | 0.0661 | 1.1643 |
| 11012 | G01 | 5439  | 64170  | CARD9     | 0.0661 | 1.1645 |
| 51011 | F04 | 54642 | 154796 | AMOT      | 0.0661 | 1.1645 |
| 51028 | F07 | 56465 | 378807 | CATSPER4  | 0.0661 | 1.1645 |
| 11077 | G02 | 1558  | 3267   | AGFG1     | 0.0662 | 1.1645 |
| 51033 | H08 | 54173 | 134466 | ZNF300P1  | 0.0662 | 1.1646 |
| 11014 | C02 | 4579  | 55726  | C12orf11  | 0.0662 | 1.1646 |
| 51028 | G06 | 53239 | 11016  | ATF7      | 0.0662 | 1.1646 |
| 11061 | F04 | 9993  | 93134  | ZNF561    | 0.0662 | 1.1647 |
| 11024 | E06 | 9499  | 55024  | BANK1     | 0.0662 | 1.1647 |
| 51009 | G06 | 54919 | 2914   | GRM4      | 0.0663 | 1.1648 |
| 11034 | E10 | 3732  | 7389   | UROD      | 0.0663 | 1.1649 |
| 11052 | D01 | 1621  | 53336  | CPXCR1    | 0.0663 | 1.1649 |
| 11085 | A08 | 1146  | 64114  | TMBIM1    | 0.0663 | 1.1649 |
| 51018 | G05 | 56094 | 146310 | RNF151    | 0.0663 | 1.1649 |
| 51004 | F07 | 54980 | 3167   | HMX2      | 0.0663 | 1.1649 |
| 51025 | H09 | 56923 | 57337  | SENP7     | 0.0663 | 1.1650 |
| 11043 | E05 | 4840  | 55194  | FAM176B   | 0.0663 | 1.1651 |
| 51014 | F12 | 52814 | 26468  | LHX6      | 0.0664 | 1.1652 |
| 51031 | A01 | 56497 | NA     | NA        | 0.0664 | 1.1653 |
| 51026 | E01 | 55376 | 140699 | C20orf132 | 0.0664 | 1.1653 |
| 11061 | C04 | 9689  | 79670  | ZCCHC6    | 0.0665 | 1.1653 |
| 11005 | A11 | 6270  | 57348  | TTYH1     | 0.0665 | 1.1653 |
| 51021 | D02 | 55824 | 93107  | KCNG4     | 0.0665 | 1.1654 |
| 31034 | E02 | 14961 | 200810 | ALG1L     | 0.0665 | 1.1655 |
| 51005 | C09 | 53847 | 349667 | RTN4RL2   | 0.0665 | 1.1656 |

|       |     |       |        |          |        |        |
|-------|-----|-------|--------|----------|--------|--------|
| 11072 | G02 | 7450  | 4686   | NCBP1    | 0.0666 | 1.1657 |
| 11074 | G05 | 9032  | 5970   | RELA     | 0.0666 | 1.1658 |
| 11066 | D03 | 1047  | 27342  | RABGEF1  | 0.0667 | 1.1659 |
| 51025 | F04 | 56336 | 90957  | DHX57    | 0.0667 | 1.1659 |
| 11005 | E09 | 726   | 83871  | RAB34    | 0.0667 | 1.1660 |
| 51035 | F08 | 54270 | 158506 | ZNF645   | 0.0667 | 1.1660 |
| 11077 | G04 | 3799  | 10906  | TRAFD1   | 0.0667 | 1.1660 |
| 11044 | H01 | 1478  | 8048   | CSRP3    | 0.0667 | 1.1661 |
| 11060 | F06 | 5700  | 6406   | SEMG1    | 0.0668 | 1.1662 |
| 11040 | A03 | 4244  | 84757  | MGC10814 | 0.0668 | 1.1662 |
| 11051 | H09 | 427   | 293    | SLC25A6  | 0.0668 | 1.1663 |
| 11064 | F05 | 4102  | 310    | ANXA7    | 0.0668 | 1.1664 |
| 11035 | A07 | 2455  | 5573   | PRKARIA  | 0.0669 | 1.1665 |
| 11045 | F11 | 9611  | 23530  | NNT      | 0.0669 | 1.1665 |
| 11072 | C01 | 1505  | 10308  | ZNF267   | 0.0669 | 1.1666 |
| 11082 | B08 | 8793  | 55114  | ARHGAP17 | 0.0670 | 1.1669 |
| 11013 | B02 | 6742  | 23636  | NUP62    | 0.0670 | 1.1669 |
| 51011 | F08 | 52964 | 257240 | KLHL34   | 0.0670 | 1.1669 |
| 11018 | E12 | 9121  | 113201 | CASC4    | 0.0670 | 1.1669 |
| 11043 | B11 | 4584  | 51596  | CUTA     | 0.0671 | 1.1670 |
| 31002 | H03 | 10543 | 86614  | HSFY1    | 0.0671 | 1.1670 |
| 31003 | F10 | 10519 | 11011  | TLK2     | 0.0672 | 1.1673 |
| 11022 | G07 | 4711  | 7372   | UMPS     | 0.0672 | 1.1673 |
| 31011 | A07 | 12035 | 64073  | C19orf33 | 0.0672 | 1.1673 |
| 51008 | H11 | 55190 | 29072  | SETD2    | 0.0672 | 1.1674 |
| 31017 | E09 | 12881 | 5569   | PKIA     | 0.0672 | 1.1674 |
| 31022 | G02 | 13560 | 3481   | IGF2     | 0.0672 | 1.1674 |
| 51023 | H01 | 56080 | 285025 | CCDC141  | 0.0672 | 1.1674 |
| 11011 | F11 | 1072  | 10376  | TUBA1B   | 0.0672 | 1.1675 |
| 51035 | D02 | 53690 | 11046  | SLC35D2  | 0.0672 | 1.1675 |
| 11062 | D12 | 4114  | 6296   | ACSM3    | 0.0672 | 1.1675 |
| 11056 | C07 | 9383  | 140691 | TRIM69   | 0.0673 | 1.1675 |
| 11018 | D03 | 6717  | 148753 | FAM163A  | 0.0673 | 1.1675 |
| 11066 | D12 | 277   | 63894  | VIPAR    | 0.0673 | 1.1676 |
| 11013 | G07 | 2299  | 1780   | DYNC111  | 0.0673 | 1.1677 |
| 11085 | B01 | 1488  | 56     | ACRV1    | 0.0674 | 1.1679 |
| 11013 | A01 | 6499  | 25917  | THUMPD3  | 0.0674 | 1.1679 |
| 11084 | B05 | 4467  | 5715   | PSMD9    | 0.0674 | 1.1680 |
| 11005 | A01 | 8575  | 80724  | ACAD10   | 0.0674 | 1.1680 |
| 11063 | B05 | 4180  | 84725  | PLEKHA8  | 0.0674 | 1.1680 |
| 11001 | A01 | 9994  | 84240  | ZCCHC9   | 0.0674 | 1.1680 |
| 11051 | D01 | 2476  | 255520 | ELMOD2   | 0.0675 | 1.1681 |
| 11056 | A03 | 4309  | 23780  | APOL2    | 0.0675 | 1.1681 |
| 31015 | G11 | 12565 | 5687   | PSMA6    | 0.0675 | 1.1681 |

|       |     |       |        |           |        |        |
|-------|-----|-------|--------|-----------|--------|--------|
| 51021 | C08 | 56629 | 1131   | CHRM3     | 0.0675 | 1.1681 |
| 11043 | A07 | 5577  | 83544  | DNAL1     | 0.0675 | 1.1681 |
| 51024 | A03 | 53498 | 23090  | ZNF423    | 0.0675 | 1.1682 |
| 11068 | G09 | 7267  | 1545   | CYP1B1    | 0.0675 | 1.1682 |
| 51001 | C09 | 52599 | 317702 | VN1R3     | 0.0675 | 1.1682 |
| 51004 | D06 | 54970 | 196541 | C13orf39  | 0.0676 | 1.1684 |
| 31034 | B02 | 14923 | 8749   | ADAM18    | 0.0676 | 1.1685 |
| 51027 | H04 | 56908 | 91893  | FDXACB1   | 0.0676 | 1.1685 |
| 11055 | G11 | 5179  | 26229  | B3GAT3    | 0.0676 | 1.1685 |
| 51014 | G03 | 52680 | 55721  | IQCC      | 0.0676 | 1.1685 |
| 11064 | D07 | 7700  | 57117  | INTS12    | 0.0677 | 1.1686 |
| 11082 | E07 | 6439  | 1603   | DAD1      | 0.0677 | 1.1686 |
| 11065 | E08 | 1463  | 11036  | GTF2A1L   | 0.0677 | 1.1687 |
| 11013 | D01 | 5243  | 875    | CBS       | 0.0677 | 1.1687 |
| 51002 | B01 | 54661 | 552900 | BOLA2     | 0.0677 | 1.1687 |
| 11054 | A12 | 337   | 113157 | RPLP0P2   | 0.0677 | 1.1688 |
| 11073 | E04 | 4248  | 9547   | CXCL14    | 0.0677 | 1.1688 |
| 11064 | B04 | 9340  | 80341  | BPIL1     | 0.0678 | 1.1688 |
| 11050 | F10 | 2756  | 55837  | EAPP      | 0.0678 | 1.1690 |
| 11011 | C07 | 6264  | 84892  | C3orf39   | 0.0678 | 1.1690 |
| 11011 | B09 | 8696  | 64151  | NCAPG     | 0.0678 | 1.1690 |
| 11014 | F07 | 4744  | 5211   | PFKL      | 0.0678 | 1.1691 |
| 51030 | G04 | 55408 | 5602   | MAPK10    | 0.0678 | 1.1691 |
| 11045 | H06 | 4092  | 5480   | PPIC      | 0.0679 | 1.1691 |
| 51012 | H07 | 52933 | 80162  | ATHL1     | 0.0679 | 1.1691 |
| 11061 | H09 | 4106  | 27237  | ARHGEF16  | 0.0679 | 1.1693 |
| 11021 | A06 | 7264  | 3487   | IGFBP4    | 0.0679 | 1.1693 |
| 51021 | D05 | 56623 | 56203  | LMOD3     | 0.0679 | 1.1693 |
| 31015 | B12 | 12725 | 146225 | CMTM2     | 0.0679 | 1.1693 |
| 31040 | E05 | 10158 | 6327   | SCN2B     | 0.0680 | 1.1694 |
| 11084 | B10 | 9554  | NA     | NA        | 0.0680 | 1.1694 |
| 11067 | F05 | 6068  | 6692   | SPINT1    | 0.0680 | 1.1695 |
| 31045 | F01 | 2895  | 5546   | PRCC      | 0.0681 | 1.1696 |
| 11070 | A09 | 10168 | 51314  | TXNDC3    | 0.0681 | 1.1697 |
| 11017 | C10 | 9167  | NA     | NA        | 0.0681 | 1.1697 |
| 31041 | D07 | 6188  | 84858  | ZNF503    | 0.0681 | 1.1698 |
| 51001 | E12 | 55338 | 222699 | LOC222699 | 0.0681 | 1.1698 |
| 11022 | C08 | 7902  | 84899  | TMTC4     | 0.0681 | 1.1699 |
| 51031 | B08 | 56894 | 113419 | TEX261    | 0.0682 | 1.1700 |
| 11073 | B10 | 4236  | 51024  | FIS1      | 0.0682 | 1.1700 |
| 31004 | H11 | 11293 | 84545  | MRPL43    | 0.0682 | 1.1701 |
| 11051 | A07 | 2560  | 54332  | GDAP1     | 0.0682 | 1.1701 |
| 11086 | H03 | 1824  | 23640  | HSPBP1    | 0.0682 | 1.1701 |
| 51032 | E05 | 56106 | 85291  | KRTAP4-2  | 0.0682 | 1.1701 |

|       |     |       |        |          |        |        |
|-------|-----|-------|--------|----------|--------|--------|
| 11057 | A06 | 9889  | 23483  | TGDS     | 0.0682 | 1.1701 |
| 11024 | H02 | 10103 | 11108  | PRDM4    | 0.0683 | 1.1704 |
| 11028 | G06 | 94    | 90701  | SEC11C   | 0.0683 | 1.1704 |
| 11072 | G08 | 2573  | 5786   | PTPRA    | 0.0684 | 1.1705 |
| 11015 | F08 | 6753  | 27089  | UQCRQ    | 0.0684 | 1.1705 |
| 31006 | B08 | 11278 | 671    | BPI      | 0.0684 | 1.1706 |
| 11050 | B05 | 9767  | 55852  | TEX2     | 0.0685 | 1.1707 |
| 11034 | F09 | 3967  | 10244  | RABEPK   | 0.0685 | 1.1707 |
| 31027 | H04 | 13946 | 3356   | HTR2A    | 0.0685 | 1.1708 |
| 11017 | G08 | 7417  | 3925   | STMN1    | 0.0685 | 1.1708 |
| 11011 | H03 | 6733  | 642    | BLMH     | 0.0685 | 1.1709 |
| 31020 | G01 | 12932 | 9023   | CH25H    | 0.0685 | 1.1709 |
| 51004 | C05 | 55223 | 326625 | MMAB     | 0.0686 | 1.1710 |
| 11019 | C05 | 6908  | 8677   | STX10    | 0.0686 | 1.1712 |
| 31014 | G07 | 12392 | 55635  | DEPDC1   | 0.0687 | 1.1713 |
| 11036 | G11 | 9217  | 51281  | ANKMY1   | 0.0687 | 1.1714 |
| 11035 | H10 | 6296  | 6005   | RHAG     | 0.0688 | 1.1716 |
| 11055 | C04 | 9928  | 2827   | GPR3     | 0.0688 | 1.1716 |
| 11066 | E07 | 2530  | 7358   | UGDH     | 0.0688 | 1.1716 |
| 11049 | H02 | 1498  | 83983  | TSSK6    | 0.0688 | 1.1717 |
| 31010 | G01 | 11396 | 80818  | ZNF436   | 0.0688 | 1.1718 |
| 51027 | F07 | 55497 | 2322   | FLT3     | 0.0689 | 1.1718 |
| 11032 | H03 | 9814  | 79621  | RNASEH2B | 0.0689 | 1.1718 |
| 51021 | C06 | 56645 | 51134  | CCDC41   | 0.0689 | 1.1719 |
| 31031 | F10 | 14599 | 2828   | GPR4     | 0.0689 | 1.1720 |
| 31002 | B12 | 10291 | 1809   | DPYSL3   | 0.0690 | 1.1721 |
| 11067 | G10 | 7586  | 80115  | BAIAP2L2 | 0.0690 | 1.1721 |
| 11047 | A02 | 9601  | 3535   | IGL@     | 0.0690 | 1.1721 |
| 31021 | F03 | 13161 | 64174  | DPEP2    | 0.0690 | 1.1721 |
| 51008 | F09 | 56072 | 5789   | PTPRD    | 0.0690 | 1.1721 |
| 11068 | F02 | 4302  | 80256  | KIAA1539 | 0.0690 | 1.1722 |
| 51011 | B09 | 53013 | 27124  | INPP5J   | 0.0690 | 1.1723 |
| 11065 | C09 | 9713  | 7942   | TFEB     | 0.0690 | 1.1723 |
| 11009 | C11 | 3682  | 3420   | IDH3B    | 0.0690 | 1.1723 |
| 31005 | E03 | 10895 | 1675   | CFD      | 0.0691 | 1.1724 |
| 11074 | A10 | 4165  | 54918  | CMTM6    | 0.0691 | 1.1725 |
| 11064 | A04 | 2832  | 84620  | ST6GAL2  | 0.0691 | 1.1726 |
| 11044 | H09 | 3033  | 51012  | SLMO2    | 0.0691 | 1.1726 |
| 11076 | E05 | 2973  | 10827  | FAM114A2 | 0.0692 | 1.1726 |
| 11002 | H03 | 9485  | 7134   | TNNC1    | 0.0692 | 1.1728 |
| 11043 | G09 | 7760  | 10627  | MYL12A   | 0.0692 | 1.1728 |
| 11078 | C05 | 5943  | 27336  | HTATSFI  | 0.0692 | 1.1728 |
| 11086 | F03 | 3510  | 1432   | MAPK14   | 0.0692 | 1.1729 |
| 11022 | G02 | 6074  | 80745  | THUMPD2  | 0.0693 | 1.1730 |

|       |     |       |        |           |        |        |
|-------|-----|-------|--------|-----------|--------|--------|
| 51024 | C10 | 55161 | 6018   | RLF       | 0.0693 | 1.1730 |
| 11039 | G08 | 2113  | 84532  | ACSS1     | 0.0693 | 1.1731 |
| 11042 | D02 | 1623  | 148203 | ZNF738    | 0.0693 | 1.1731 |
| 51027 | B01 | 55371 | 114798 | SLITRK1   | 0.0693 | 1.1731 |
| 31024 | C07 | 13771 | NA     | NA        | 0.0694 | 1.1732 |
| 31031 | A07 | 14626 | 728233 | PI4KAP1   | 0.0694 | 1.1732 |
| 11030 | D10 | 3981  | 3181   | HNRNPA2B1 | 0.0694 | 1.1733 |
| 51020 | A02 | 56565 | 386672 | KRTAP10-4 | 0.0695 | 1.1735 |
| 11016 | C09 | 5291  | 5763   | PTMS      | 0.0695 | 1.1735 |
| 11052 | A10 | 394   | 11331  | PHB2      | 0.0695 | 1.1735 |
| 11074 | A07 | 4621  | 79036  | C19orf50  | 0.0695 | 1.1737 |
| 11048 | G05 | 5023  | 83546  | RTBDN     | 0.0695 | 1.1737 |
| 11046 | B08 | 9502  | 54734  | RAB39     | 0.0696 | 1.1737 |
| 11054 | D09 | 8849  | 9743   | ARHGAP32  | 0.0696 | 1.1738 |
| 11076 | E03 | 3742  | 8837   | CFLAR     | 0.0696 | 1.1738 |
| 11009 | F12 | 8885  | 2778   | GNAS      | 0.0697 | 1.1740 |
| 31041 | A01 | 9104  | 10999  | SLC27A4   | 0.0697 | 1.1741 |
| 11053 | B07 | 3392  | 51324  | SPG21     | 0.0697 | 1.1741 |
| 11066 | D08 | 7030  | 29952  | DPP7      | 0.0697 | 1.1741 |
| 11061 | H08 | 10205 | 91683  | SYT12     | 0.0697 | 1.1741 |
| 11036 | H08 | 4718  | 7041   | TGFB111   | 0.0697 | 1.1742 |
| 31014 | C04 | 11992 | 83483  | PLVAP     | 0.0698 | 1.1742 |
| 31023 | H06 | 13448 | 10809  | STARD10   | 0.0698 | 1.1743 |
| 11007 | A09 | 7376  | 51170  | HSD17B11  | 0.0698 | 1.1744 |
| 51001 | C11 | 52576 | 127124 | ATP6V1G3  | 0.0698 | 1.1744 |
| 11067 | G11 | 2649  | 1638   | DCT       | 0.0698 | 1.1745 |
| 11001 | A09 | 54    | 57228  | SMAGP     | 0.0699 | 1.1745 |
| 11075 | F07 | 2409  | 6138   | RPL15     | 0.0699 | 1.1747 |
| 11064 | A01 | 8787  | 3603   | IL16      | 0.0699 | 1.1747 |
| 11080 | E04 | 9877  | 56143  | PCDHA5    | 0.0700 | 1.1748 |
| 31007 | E06 | 11313 | 83666  | PARP9     | 0.0700 | 1.1748 |
| 11038 | A08 | 5978  | 2923   | PDIA3     | 0.0700 | 1.1749 |
| 51031 | C07 | 55244 | NA     | NA        | 0.0700 | 1.1749 |
| 11076 | C03 | 4024  | 79441  | HAUS3     | 0.0700 | 1.1749 |
| 31027 | D08 | 15023 | 79152  | FA2H      | 0.0700 | 1.1749 |
| 31025 | F02 | 13512 | 284459 | HKR1      | 0.0700 | 1.1750 |
| 11016 | E11 | 7520  | 55863  | TMEM126B  | 0.0700 | 1.1750 |
| 31040 | G11 | 5901  | 9421   | HAND1     | 0.0701 | 1.1751 |
| 51021 | H02 | 56634 | 125488 | TTC39C    | 0.0701 | 1.1751 |
| 51027 | H10 | 56084 | 84000  | TMPRSS13  | 0.0701 | 1.1751 |
| 51004 | E01 | 53112 | 9230   | RAB11B    | 0.0701 | 1.1751 |
| 11007 | G08 | 6945  | 162394 | SLFN5     | 0.0701 | 1.1752 |
| 51023 | G08 | 54154 | 55698  | RADIL     | 0.0701 | 1.1752 |
| 11015 | B03 | 9025  | 3176   | HNMT      | 0.0701 | 1.1753 |

|       |     |       |        |           |        |        |
|-------|-----|-------|--------|-----------|--------|--------|
| 11059 | D06 | 5270  | 7867   | MAPKAPK3  | 0.0702 | 1.1754 |
| 11057 | A10 | 3932  | 83729  | INHBE     | 0.0702 | 1.1754 |
| 11086 | F04 | 6390  | 9555   | H2AFY     | 0.0702 | 1.1755 |
| 11016 | C08 | 3503  | 78988  | MRP63     | 0.0702 | 1.1755 |
| 11044 | B07 | 8527  | 1907   | EDN2      | 0.0702 | 1.1755 |
| 51012 | C09 | 53712 | 27244  | SESN1     | 0.0703 | 1.1756 |
| 11079 | F09 | 9461  | 91662  | NLRP12    | 0.0703 | 1.1757 |
| 31044 | H10 | 2027  | 5281   | PIGF      | 0.0703 | 1.1758 |
| 11048 | A08 | 600   | 25932  | CLIC4     | 0.0703 | 1.1758 |
| 11005 | A12 | 495   | 64754  | SMYD3     | 0.0703 | 1.1758 |
| 11019 | E09 | 6309  | 2950   | GSTP1     | 0.0704 | 1.1759 |
| 51035 | F03 | 53573 | 57818  | G6PC2     | 0.0704 | 1.1759 |
| 11065 | C08 | 9604  | 64428  | NARFL     | 0.0704 | 1.1760 |
| 11060 | E09 | 5496  | 10605  | PAIP1     | 0.0704 | 1.1760 |
| 31026 | F10 | 13855 | 26085  | KLK13     | 0.0704 | 1.1760 |
| 11020 | B07 | 3157  | 7314   | UBB       | 0.0704 | 1.1760 |
| 11015 | E04 | 9017  | 1288   | COL4A6    | 0.0704 | 1.1761 |
| 11073 | E03 | 4211  | 6273   | S100A2    | 0.0704 | 1.1761 |
| 11035 | D02 | 1998  | 54855  | FAM46C    | 0.0705 | 1.1761 |
| 11024 | F11 | 10162 | 84249  | PSD2      | 0.0705 | 1.1761 |
| 31041 | A11 | 5244  | 6181   | RPLP2     | 0.0705 | 1.1762 |
| 11053 | E10 | 3952  | 6449   | SGTA      | 0.0705 | 1.1763 |
| 11010 | G03 | 6207  | 57109  | REXO4     | 0.0705 | 1.1763 |
| 51034 | E01 | 53511 | 3439   | IFNA1     | 0.0705 | 1.1763 |
| 11085 | C09 | 9820  | 586    | BCAT1     | 0.0706 | 1.1764 |
| 11064 | D12 | 8730  | 752    | FMNL1     | 0.0706 | 1.1765 |
| 11046 | G06 | 2387  | 50999  | TMED5     | 0.0706 | 1.1765 |
| 11048 | E02 | 4633  | 84336  | TMEM101   | 0.0707 | 1.1767 |
| 11064 | B05 | 1028  | 55260  | TMEM143   | 0.0707 | 1.1768 |
| 31006 | H01 | 11147 | 26094  | DCAF4     | 0.0707 | 1.1768 |
| 11053 | D04 | 457   | 64115  | C10orf54  | 0.0707 | 1.1769 |
| 11050 | G09 | 2771  | 51110  | LACTB2    | 0.0707 | 1.1769 |
| 11034 | B11 | 2064  | 8935   | SKAP2     | 0.0708 | 1.1769 |
| 51035 | E06 | 53649 | 10107  | TRIM10    | 0.0708 | 1.1770 |
| 31034 | G03 | 14826 | 342538 | NACA2     | 0.0708 | 1.1770 |
| 11002 | D02 | 10029 | 27241  | BBS9      | 0.0708 | 1.1770 |
| 51025 | H03 | 56871 | 23271  | CAMSAP1L1 | 0.0708 | 1.1771 |
| 11027 | F02 | 3505  | 55651  | NHP2      | 0.0708 | 1.1772 |
| 11003 | F10 | 2773  | 8773   | SNAP23    | 0.0708 | 1.1772 |
| 51005 | C03 | 55037 | 53836  | GPR87     | 0.0709 | 1.1772 |
| 11075 | B02 | 4646  | 28511  | NKIRAS2   | 0.0709 | 1.1773 |
| 11016 | F11 | 7509  | 6451   | SH3BGRL   | 0.0709 | 1.1773 |
| 11068 | E12 | 9680  | 54462  | FAM190B   | 0.0709 | 1.1773 |
| 51004 | D08 | 55536 | 27341  | RRP7A     | 0.0709 | 1.1774 |

|       |     |       |        |          |        |        |
|-------|-----|-------|--------|----------|--------|--------|
| 31002 | F07 | 10681 | 375056 | MIA3     | 0.0709 | 1.1774 |
| 31020 | A08 | 13117 | 55364  | IMPACT   | 0.0710 | 1.1776 |
| 51017 | F02 | 56027 | 10866  | HCP5     | 0.0710 | 1.1776 |
| 11034 | G11 | 3551  | 5719   | PSMD13   | 0.0710 | 1.1776 |
| 11050 | G04 | 593   | 79641  | ROGDI    | 0.0710 | 1.1777 |
| 11076 | B10 | 4809  | 8445   | DYRK2    | 0.0711 | 1.1777 |
| 11073 | D05 | 8911  | 79175  | ZNF343   | 0.0711 | 1.1778 |
| 11069 | F11 | 7802  | 3495   | IGHD     | 0.0711 | 1.1778 |
| 51022 | C12 | 56181 | 54910  | SEMA4C   | 0.0711 | 1.1778 |
| 11018 | A08 | 6995  | 51148  | CERCAM   | 0.0711 | 1.1778 |
| 31004 | H03 | 10459 | 125336 | LOXHD1   | 0.0711 | 1.1780 |
| 11039 | C04 | 9120  | 54904  | WHSC1L1  | 0.0711 | 1.1780 |
| 11081 | H04 | 5268  | 10650  | SLMO1    | 0.0712 | 1.1780 |
| 51006 | G09 | 53581 | 114795 | TMEM132B | 0.0712 | 1.1780 |
| 11028 | D05 | 3221  | 11333  | PDAP1    | 0.0712 | 1.1780 |
| 11021 | D11 | 3794  | 3638   | INSIG1   | 0.0712 | 1.1781 |
| 51025 | G06 | 56930 | 23061  | TBC1D9B  | 0.0712 | 1.1782 |
| 31021 | H09 | 13056 | 55711  | FAR2     | 0.0713 | 1.1783 |
| 11074 | C12 | 872   | 64983  | MRPL32   | 0.0713 | 1.1785 |
| 11045 | A01 | 6367  | 10219  | KLRG1    | 0.0714 | 1.1786 |
| 11045 | H11 | 2951  | 11067  | C10orf10 | 0.0714 | 1.1786 |
| 31044 | C12 | 881   | 3115   | HLA-DPB1 | 0.0714 | 1.1787 |
| 11046 | G03 | 6242  | 7458   | EIF4H    | 0.0714 | 1.1787 |
| 51022 | B08 | 56661 | 1311   | COMP     | 0.0714 | 1.1788 |
| 51022 | C03 | 56173 | 7733   | ZNF180   | 0.0715 | 1.1788 |
| 11060 | G02 | 5804  | 6122   | RPL3     | 0.0715 | 1.1789 |
| 31038 | G06 | 14642 | 30000  | TNPO2    | 0.0715 | 1.1789 |
| 11057 | D03 | 1195  | 2770   | GNAI1    | 0.0715 | 1.1790 |
| 31030 | G06 | 14330 | 2898   | GRIK2    | 0.0715 | 1.1790 |
| 11011 | F03 | 5841  | 55846  | ITFG2    | 0.0715 | 1.1790 |
| 11081 | E06 | 2926  | 1112   | FOXN3    | 0.0715 | 1.1791 |
| 11056 | G01 | 3771  | 10218  | ANGPTL7  | 0.0716 | 1.1791 |
| 11075 | E09 | 5475  | 3606   | IL18     | 0.0716 | 1.1792 |
| 11060 | F05 | 10131 | 23596  | OPN3     | 0.0716 | 1.1792 |
| 11068 | H09 | 8174  | 6646   | SOAT1    | 0.0716 | 1.1793 |
| 11056 | F04 | 1734  | 81565  | NDEL1    | 0.0716 | 1.1793 |
| 11056 | C01 | 7125  | 2783   | GNB2     | 0.0717 | 1.1795 |
| 11045 | C08 | 184   | 11021  | RAB35    | 0.0717 | 1.1795 |
| 11048 | E12 | 2854  | 6715   | SRD5A1   | 0.0717 | 1.1795 |
| 11076 | G03 | 4576  | 23786  | BCL2L13  | 0.0718 | 1.1799 |
| 51014 | H02 | 55007 | 3570   | IL6R     | 0.0718 | 1.1799 |
| 11009 | E09 | 3093  | 79661  | NEIL1    | 0.0719 | 1.1799 |
| 51022 | C06 | 56172 | 5648   | MASP1    | 0.0719 | 1.1800 |
| 31042 | E12 | 5185  | 3107   | HLA-C    | 0.0719 | 1.1801 |

|       |     |       |        |          |        |        |
|-------|-----|-------|--------|----------|--------|--------|
| 51013 | G03 | 53609 | 5818   | PVRL1    | 0.0719 | 1.1801 |
| 11038 | E03 | 6046  | 9322   | TRIP10   | 0.0719 | 1.1802 |
| 31045 | G08 | 3227  | 51293  | CD320    | 0.0719 | 1.1802 |
| 31013 | B11 | 12049 | 113115 | FAM54A   | 0.0719 | 1.1802 |
| 11069 | F05 | 10009 | 1536   | CYBB     | 0.0720 | 1.1804 |
| 11084 | G07 | 5668  | 9022   | CLIC3    | 0.0720 | 1.1804 |
| 11065 | C10 | 9825  | 57172  | CAMK1G   | 0.0720 | 1.1804 |
| 31013 | F05 | 11958 | 10170  | DHRS9    | 0.0721 | 1.1805 |
| 11087 | A06 | 449   | 6242   | RTKN     | 0.0721 | 1.1805 |
| 11007 | A02 | 1395  | 1264   | CNN1     | 0.0721 | 1.1805 |
| 11040 | E03 | 5005  | 84278  | HIATL2   | 0.0721 | 1.1805 |
| 11020 | G09 | 7567  | 51805  | COQ3     | 0.0721 | 1.1807 |
| 11015 | F03 | 7950  | 442582 | STAG3L2  | 0.0722 | 1.1808 |
| 11053 | H04 | 125   | 64063  | PRSS22   | 0.0722 | 1.1808 |
| 51014 | H09 | 52819 | 378884 | NHLRC1   | 0.0722 | 1.1808 |
| 11063 | D04 | 3928  | 83605  | CCM2     | 0.0722 | 1.1808 |
| 11014 | B07 | 6165  | 7064   | THOP1    | 0.0722 | 1.1810 |
| 11019 | A10 | 9154  | 339976 | TRIML1   | 0.0723 | 1.1810 |
| 51021 | E03 | 56689 | 252983 | STXBP4   | 0.0723 | 1.1811 |
| 11007 | A06 | 8274  | 58529  | MYOZ1    | 0.0723 | 1.1812 |
| 11063 | B12 | 5277  | 79971  | WLS      | 0.0723 | 1.1812 |
| 11020 | B03 | 5576  | 3422   | IDI1     | 0.0723 | 1.1813 |
| 11019 | H03 | 3383  | 65993  | MRPS34   | 0.0724 | 1.1813 |
| 31018 | C03 | 13022 | 4068   | SH2D1A   | 0.0724 | 1.1814 |
| 11029 | B08 | 4012  | 23521  | RPL13A   | 0.0724 | 1.1814 |
| 11012 | A04 | 3159  | 8568   | RRP1     | 0.0724 | 1.1815 |
| 11069 | G03 | 474   | 6713   | SQLE     | 0.0724 | 1.1815 |
| 51011 | E02 | 54546 | 11141  | IL1RAPL1 | 0.0725 | 1.1816 |
| 11055 | C06 | 556   | 80305  | TRABD    | 0.0725 | 1.1817 |
| 11063 | G03 | 9671  | 200576 | PIKFYVE  | 0.0725 | 1.1817 |
| 11063 | G11 | 6832  | 3661   | IRF3     | 0.0725 | 1.1817 |
| 31004 | D05 | 11025 | 7341   | SUMO1    | 0.0726 | 1.1818 |
| 31007 | G04 | 11229 | 3801   | KIFC3    | 0.0726 | 1.1818 |
| 11059 | D11 | 1079  | 4276   | MICA     | 0.0726 | 1.1818 |
| 11002 | G05 | 9690  | 207063 | DHRSX    | 0.0726 | 1.1819 |
| 11005 | G07 | 1450  | 135138 | PACRG    | 0.0726 | 1.1819 |
| 51031 | E11 | 55260 | 158234 | RG9MTD3  | 0.0726 | 1.1820 |
| 11032 | E11 | 1001  | 8832   | CD84     | 0.0726 | 1.1820 |
| 11055 | B01 | 2503  | 56934  | CA10     | 0.0726 | 1.1821 |
| 11073 | E11 | 4399  | 64792  | RABL5    | 0.0727 | 1.1822 |
| 11025 | C01 | 2361  | 79830  | ZMYM1    | 0.0727 | 1.1822 |
| 51014 | H07 | 52895 | 394263 | MUC21    | 0.0727 | 1.1822 |
| 11076 | A05 | 8918  | 1106   | CHD2     | 0.0728 | 1.1824 |
| 11017 | D09 | 6464  | 94107  | TMEM203  | 0.0728 | 1.1825 |



|       |     |       |        |          |        |        |
|-------|-----|-------|--------|----------|--------|--------|
| 11056 | H04 | 4089  | 439    | ASNA1    | 0.0728 | 1.1826 |
| 51011 | A05 | 53834 | 64241  | ABCG8    | 0.0728 | 1.1826 |
| 11073 | B11 | 2364  | 122961 | ISCA2    | 0.0729 | 1.1827 |
| 11069 | G08 | 2403  | 4999   | ORC2L    | 0.0729 | 1.1827 |
| 11026 | C08 | 6757  | 51522  | TMEM14C  | 0.0729 | 1.1828 |
| 31004 | B12 | 10963 | 5638   | PRRG1    | 0.0729 | 1.1829 |
| 11050 | D03 | 9306  | 5191   | PEX7     | 0.0730 | 1.1829 |
| 11087 | E04 | 10008 | 1573   | CYP2J2   | 0.0730 | 1.1829 |
| 51015 | B08 | 52899 | 140825 | NEURL2   | 0.0730 | 1.1831 |
| 51034 | G11 | 53850 | 56656  | OR2S2    | 0.0730 | 1.1831 |
| 11001 | C07 | 219   | 51123  | ZNF706   | 0.0730 | 1.1832 |
| 11011 | C11 | 3882  | 8878   | SQSTM1   | 0.0731 | 1.1832 |
| 11013 | B06 | 3537  | 23759  | PPIL2    | 0.0731 | 1.1832 |
| 31026 | F08 | 13793 | 1215   | CMA1     | 0.0731 | 1.1833 |
| 11018 | C02 | 3325  | 51647  | FAM96B   | 0.0731 | 1.1834 |
| 11045 | C03 | 8767  | 22859  | LPHN1    | 0.0732 | 1.1835 |
| 11077 | F12 | 6190  | 4285   | MIPEP    | 0.0732 | 1.1837 |
| 31023 | G11 | 13618 | 1230   | CCR1     | 0.0733 | 1.1837 |
| 11073 | F03 | 4154  | 1611   | DAP      | 0.0733 | 1.1838 |
| 11011 | C09 | 781   | 4942   | OAT      | 0.0734 | 1.1840 |
| 11055 | H07 | 349   | 55266  | TMEM19   | 0.0734 | 1.1840 |
| 31006 | A03 | 11152 | 167681 | PRSS35   | 0.0734 | 1.1842 |
| 51022 | D08 | 56257 | 7220   | TRPC1    | 0.0735 | 1.1844 |
| 51001 | G10 | 52942 | 11337  | GABARAP  | 0.0735 | 1.1844 |
| 31014 | B11 | 11991 | 54503  | ZDHHC13  | 0.0735 | 1.1844 |
| 11036 | F05 | 849   | 1173   | AP2M1    | 0.0735 | 1.1844 |
| 11018 | A06 | 6538  | 79922  | MRM1     | 0.0735 | 1.1845 |
| 11005 | G09 | 8423  | 1154   | CISH     | 0.0735 | 1.1845 |
| 11077 | E02 | 3744  | 22978  | NT5C2    | 0.0735 | 1.1845 |
| 11037 | B11 | 6700  | 80032  | ZNF556   | 0.0736 | 1.1847 |
| 51030 | E03 | 56456 | 221262 | CCDC162  | 0.0736 | 1.1847 |
| 51024 | D05 | 56289 | 57584  | ARHGAP21 | 0.0736 | 1.1848 |
| 11006 | F01 | 5144  | 56270  | WDR45L   | 0.0736 | 1.1848 |
| 51025 | E03 | 56869 | 368    | ABCC6    | 0.0736 | 1.1848 |
| 31044 | F05 | 3184  | 10293  | TRAIP    | 0.0737 | 1.1849 |
| 11039 | E08 | 2080  | 57697  | FANCM    | 0.0737 | 1.1850 |
| 31006 | G02 | 11118 | 56157  | TEX13A   | 0.0737 | 1.1851 |
| 11052 | H06 | 5555  | 5828   | PEX2     | 0.0738 | 1.1851 |
| 11067 | D11 | 9721  | 1595   | CYP51A1  | 0.0738 | 1.1852 |
| 11085 | C06 | 3302  | 900    | CCNG1    | 0.0738 | 1.1852 |
| 11012 | A07 | 8961  | 4302   | MLLT6    | 0.0738 | 1.1852 |
| 51014 | G06 | 52932 | 374899 | ZNF829   | 0.0738 | 1.1853 |
| 11043 | F09 | 8786  | 203054 | ADCK5    | 0.0738 | 1.1853 |
| 51014 | F02 | 53470 | 163590 | TOR1AIP2 | 0.0738 | 1.1853 |

|       |     |       |        |          |        |        |
|-------|-----|-------|--------|----------|--------|--------|
| 11040 | C01 | 6975  | 3338   | DNAJC4   | 0.0738 | 1.1853 |
| 51027 | C10 | 53206 | 8526   | DGKE     | 0.0739 | 1.1854 |
| 11045 | H05 | 2682  | 9076   | CLDN1    | 0.0739 | 1.1855 |
| 11019 | D05 | 7313  | 27314  | RAB30    | 0.0739 | 1.1855 |
| 11069 | G11 | 2338  | 8693   | GALNT4   | 0.0739 | 1.1856 |
| 11027 | C01 | 2263  | 90637  | ZFAND2A  | 0.0739 | 1.1856 |
| 31008 | G03 | 11456 | 6383   | SDC2     | 0.0740 | 1.1858 |
| 11020 | C07 | 5421  | 9982   | FGFBP1   | 0.0740 | 1.1859 |
| 11011 | F12 | 229   | 10376  | TUBA1B   | 0.0740 | 1.1859 |
| 11076 | D08 | 1915  | 91584  | PLXNA4   | 0.0741 | 1.1861 |
| 31036 | C09 | 11530 | 161142 | FAM71D   | 0.0744 | 1.1869 |
| 31024 | B10 | 13772 | 64860  | ARMCX5   | 0.0744 | 1.1870 |
| 11013 | G06 | 1188  | 1780   | DYNC1I1  | 0.0744 | 1.1870 |
| 11077 | F03 | 1402  | 9583   | ENTPD4   | 0.0745 | 1.1870 |
| 11053 | A07 | 5682  | 10478  | SLC25A17 | 0.0745 | 1.1870 |
| 31032 | B07 | 14692 | 51643  | TMBIM4   | 0.0745 | 1.1872 |
| 11082 | D06 | 8937  | 22837  | COBLL1   | 0.0745 | 1.1872 |
| 51023 | H02 | 55886 | 7098   | TLR3     | 0.0747 | 1.1876 |
| 11010 | G01 | 3435  | 2847   | MCHR1    | 0.0747 | 1.1877 |
| 11067 | F10 | 2438  | 9812   | KIAA0141 | 0.0747 | 1.1877 |
| 11063 | C09 | 1411  | 168391 | GALNTL5  | 0.0747 | 1.1878 |
| 31031 | A03 | 14641 | 23500  | DAAM2    | 0.0748 | 1.1878 |
| 11060 | B09 | 837   | 427    | ASAH1    | 0.0748 | 1.1879 |
| 31011 | A03 | 11363 | 9543   | IGDCC3   | 0.0748 | 1.1880 |
| 11054 | H02 | 4447  | 246329 | STAC3    | 0.0748 | 1.1880 |
| 51024 | C03 | 56326 | 79628  | SH3TC2   | 0.0749 | 1.1881 |
| 51024 | C01 | 56253 | 80169  | C17orf68 | 0.0749 | 1.1881 |
| 31026 | C12 | 13920 | 10369  | CACNG2   | 0.0749 | 1.1882 |
| 11030 | H10 | 7486  | 64801  | ARV1     | 0.0749 | 1.1882 |
| 11082 | C02 | 3463  | 64981  | MRPL34   | 0.0749 | 1.1883 |
| 31042 | A09 | 5706  | 900    | CCNG1    | 0.0749 | 1.1883 |
| 11050 | B03 | 538   | 958    | CD40     | 0.0749 | 1.1883 |
| 51010 | H10 | 52941 | 56624  | ASAH2    | 0.0749 | 1.1883 |
| 11044 | D08 | 4423  | 25915  | NDUFAF3  | 0.0750 | 1.1884 |
| 11035 | A03 | 2350  | 8577   | TMEFF1   | 0.0750 | 1.1885 |
| 11016 | H04 | 6294  | 11147  | HHLA3    | 0.0750 | 1.1885 |
| 51027 | D02 | 56331 | 64398  | MPP5     | 0.0750 | 1.1886 |
| 11034 | E01 | 8778  | 27125  | AFF4     | 0.0750 | 1.1886 |
| 11089 | B03 | 768   | 200014 | CC2D1B   | 0.0750 | 1.1886 |
| 11081 | G06 | 9522  | 1021   | CDK6     | 0.0751 | 1.1887 |
| 11086 | H11 | 2059  | 7504   | XK       | 0.0751 | 1.1887 |
| 11059 | D10 | 1058  | 60485  | SAV1     | 0.0751 | 1.1888 |
| 11006 | D07 | 6214  | 3612   | IMPA1    | 0.0751 | 1.1888 |
| 11073 | G02 | 8881  | 9321   | TRIP11   | 0.0751 | 1.1888 |

|       |     |       |        |           |        |        |
|-------|-----|-------|--------|-----------|--------|--------|
| 31044 | H02 | 4340  | 8717   | TRADD     | 0.0751 | 1.1888 |
| 11018 | B04 | 9094  | 80017  | C14orf159 | 0.0751 | 1.1889 |
| 31017 | C08 | 12893 | 5552   | SRGN      | 0.0752 | 1.1890 |
| 11052 | F03 | 5057  | 84304  | NUDT22    | 0.0752 | 1.1891 |
| 11010 | H06 | 2981  | 25970  | SH2B1     | 0.0754 | 1.1896 |
| 11002 | A02 | 9240  | 142913 | CFLP1     | 0.0754 | 1.1896 |
| 11047 | D06 | 8870  | 51151  | SLC45A2   | 0.0755 | 1.1897 |
| 11062 | A02 | 1066  | 317662 | FAM149B1  | 0.0755 | 1.1898 |
| 31008 | H07 | 11586 | 23492  | CBX7      | 0.0755 | 1.1898 |
| 11066 | B03 | 9962  | 9562   | MINPP1    | 0.0755 | 1.1899 |
| 11075 | G05 | 8977  | 65083  | NOL6      | 0.0755 | 1.1899 |
| 51032 | A07 | 55404 | 172    | AFG3L1    | 0.0755 | 1.1900 |
| 51027 | B08 | 55449 | 5745   | PTH1R     | 0.0756 | 1.1901 |
| 11011 | B04 | 4814  | 10226  | PLIN3     | 0.0757 | 1.1903 |
| 51027 | G06 | 55314 | 90379  | DCAF15    | 0.0757 | 1.1903 |
| 11060 | B01 | 7852  | 22944  | KIN       | 0.0757 | 1.1903 |
| 11047 | B03 | 5075  | 83695  | C12orf32  | 0.0758 | 1.1906 |
| 11060 | E06 | 6564  | 3880   | KRT19     | 0.0758 | 1.1906 |
| 11052 | A06 | 4829  | 3795   | KHK       | 0.0758 | 1.1907 |
| 31036 | G08 | 11337 | 119395 | CALHM3    | 0.0758 | 1.1907 |
| 11048 | F05 | 6472  | 22822  | PHLDA1    | 0.0759 | 1.1909 |
| 31040 | A07 | 9439  | 94033  | FTMT      | 0.0759 | 1.1909 |
| 51004 | E04 | 52600 | 151888 | BTLA      | 0.0759 | 1.1909 |
| 51002 | B02 | 54628 | 441108 | C5orf56   | 0.0759 | 1.1909 |
| 51022 | E10 | 56252 | 7544   | ZFY       | 0.0759 | 1.1910 |
| 11015 | H05 | 7769  | 138162 | C9orf116  | 0.0759 | 1.1910 |
| 11081 | E01 | 8891  | 2909   | GRLF1     | 0.0760 | 1.1911 |
| 11044 | D03 | 4825  | 7328   | UBE2H     | 0.0760 | 1.1912 |
| 11029 | C09 | 3715  | 10477  | UBE2E3    | 0.0760 | 1.1912 |
| 31030 | D04 | 14239 | 23293  | SMG6      | 0.0760 | 1.1913 |
| 51012 | C06 | 52834 | 145501 | ISM2      | 0.0760 | 1.1913 |
| 51005 | A09 | 54086 | 91694  | LONRF1    | 0.0760 | 1.1913 |
| 11027 | F07 | 7931  | 6647   | SOD1      | 0.0760 | 1.1914 |
| 11067 | E01 | 10111 | 23276  | KLHL18    | 0.0760 | 1.1914 |
| 11021 | C06 | 5571  | 23436  | CELA3B    | 0.0761 | 1.1914 |
| 31035 | D02 | 14983 | 25959  | KANK2     | 0.0761 | 1.1914 |
| 31005 | H10 | 10905 | 145482 | PTGR2     | 0.0762 | 1.1917 |
| 11032 | A08 | 6441  | 56647  | BCCIP     | 0.0762 | 1.1917 |
| 11063 | A08 | 4086  | 3696   | ITGB8     | 0.0762 | 1.1918 |
| 11044 | H06 | 179   | 57403  | RAB22A    | 0.0762 | 1.1919 |
| 51020 | B01 | 56403 | 54438  | GFOD1     | 0.0763 | 1.1921 |
| 11022 | A09 | 7195  | 9262   | STK17B    | 0.0763 | 1.1922 |
| 11004 | G07 | 1336  | 256710 | GLIPR1L1  | 0.0764 | 1.1922 |
| 11085 | A03 | 4954  | 3755   | KCNG1     | 0.0764 | 1.1924 |

|       |     |       |        |           |        |        |
|-------|-----|-------|--------|-----------|--------|--------|
| 11046 | B07 | 8503  | 9045   | RPL14     | 0.0764 | 1.1924 |
| 11043 | H07 | 3095  | 124220 | ZG16B     | 0.0765 | 1.1925 |
| 31014 | F12 | 12564 | 26519  | TIMM10    | 0.0765 | 1.1926 |
| 11019 | A07 | 6114  | 138065 | RNF183    | 0.0765 | 1.1926 |
| 51015 | E10 | 53028 | 5078   | PAX4      | 0.0765 | 1.1927 |
| 31008 | B06 | 11547 | 2878   | GPX3      | 0.0766 | 1.1928 |
| 11010 | F08 | 5150  | 79656  | BEND5     | 0.0766 | 1.1929 |
| 51026 | B09 | 56833 | 10308  | ZNF267    | 0.0766 | 1.1929 |
| 11028 | D04 | 5345  | 3481   | IGF2      | 0.0766 | 1.1930 |
| 31042 | B06 | 6651  | 25855  | BRMS1     | 0.0767 | 1.1930 |
| 31023 | D06 | 13434 | 91647  | ATPAF2    | 0.0767 | 1.1931 |
| 11010 | D11 | 588   | 8372   | HYAL3     | 0.0767 | 1.1931 |
| 11063 | D01 | 1233  | 9771   | RAPGEF5   | 0.0767 | 1.1932 |
| 11018 | E11 | 9077  | 55293  | UEVLD     | 0.0767 | 1.1932 |
| 51023 | D03 | 55966 | 83844  | USP26     | 0.0767 | 1.1932 |
| 11062 | C01 | 2277  | 126248 | WDR88     | 0.0767 | 1.1932 |
| 31025 | A08 | 14002 | 5149   | PDE6H     | 0.0767 | 1.1932 |
| 11067 | C03 | 2668  | 2444   | FRK       | 0.0767 | 1.1933 |
| 31001 | B05 | 10735 | 2395   | FXN       | 0.0768 | 1.1933 |
| 31016 | D06 | 12422 | 252969 | NEIL2     | 0.0768 | 1.1934 |
| 11055 | H05 | 6176  | 112936 | VPS26B    | 0.0768 | 1.1934 |
| 51006 | E06 | 54512 | 7711   | ZNF155    | 0.0768 | 1.1935 |
| 31034 | G05 | 14999 | 353116 | RILPL1    | 0.0769 | 1.1937 |
| 31023 | C09 | 13378 | 3939   | LDHA      | 0.0769 | 1.1937 |
| 31040 | C12 | 5214  | 84937  | ZNRF1     | 0.0769 | 1.1937 |
| 51004 | B12 | 55290 | 4082   | MARCKS    | 0.0769 | 1.1937 |
| 51004 | G03 | 53403 | 50614  | GALNT9    | 0.0769 | 1.1938 |
| 11088 | E12 | 1664  | 84340  | GFM2      | 0.0769 | 1.1938 |
| 11053 | D09 | 7022  | 9255   | AIMP1     | 0.0769 | 1.1938 |
| 31008 | D10 | 11555 | 55301  | OLAH      | 0.0769 | 1.1939 |
| 11043 | F10 | 8947  | 55500  | ETNK1     | 0.0770 | 1.1939 |
| 11030 | H08 | 9790  | 283080 | C10orf126 | 0.0770 | 1.1939 |
| 51028 | F05 | 55355 | 2589   | GALNT1    | 0.0770 | 1.1939 |
| 11015 | A09 | 9105  | 112812 | FDX1L     | 0.0770 | 1.1940 |
| 11067 | C05 | 1520  | 57669  | EPB41L5   | 0.0770 | 1.1941 |
| 11036 | A11 | 1490  | 200403 | VWA3B     | 0.0771 | 1.1941 |
| 31026 | C03 | 13952 | 7809   | BSND      | 0.0771 | 1.1942 |
| 51002 | A01 | 52613 | 4104   | MAGEA5    | 0.0771 | 1.1943 |
| 31008 | H04 | 11640 | 164633 | CABP7     | 0.0772 | 1.1945 |
| 11048 | C04 | 6230  | 10228  | STX6      | 0.0772 | 1.1946 |
| 11061 | C09 | 5343  | 10295  | BCKDK     | 0.0772 | 1.1946 |
| 11018 | G10 | 7958  | 4267   | CD99      | 0.0772 | 1.1946 |
| 51027 | F01 | 56817 | 197320 | ZNF778    | 0.0773 | 1.1947 |
| 31001 | B03 | 10491 | 152189 | CMTM8     | 0.0773 | 1.1947 |

|       |     |       |        |         |        |        |
|-------|-----|-------|--------|---------|--------|--------|
| 31003 | G02 | 10657 | 83887  | TTLL2   | 0.0773 | 1.1948 |
| 11062 | F01 | 5337  | 91523  | FAM113B | 0.0773 | 1.1948 |
| 51031 | A02 | 55521 | 80896  | NPL     | 0.0773 | 1.1948 |
| 11014 | E12 | 667   | 2305   | FOXM1   | 0.0773 | 1.1948 |
| 31040 | A02 | 213   | 6059   | ABCE1   | 0.0774 | 1.1950 |
| 11058 | E03 | 7117  | 55565  | ZNF821  | 0.0774 | 1.1951 |
| 31014 | G09 | 12016 | 4323   | MMP14   | 0.0774 | 1.1952 |
| 11089 | D04 | 515   | 10463  | SLC30A9 | 0.0775 | 1.1953 |
| 11011 | H04 | 4649  | 57721  | METTL14 | 0.0775 | 1.1954 |
| 31040 | B01 | 8190  | 92181  | UBTD2   | 0.0775 | 1.1954 |
| 11017 | C05 | 7392  | 57092  | PCNP    | 0.0775 | 1.1954 |
| 11013 | D06 | 6018  | 440    | ASNS    | 0.0775 | 1.1955 |
| 31028 | D08 | 14106 | 4337   | MOCS1   | 0.0775 | 1.1955 |
| 11047 | F11 | 1030  | 6398   | SECTM1  | 0.0776 | 1.1955 |
| 11027 | H11 | 1160  | 5367   | PMCH    | 0.0776 | 1.1958 |
| 11076 | C08 | 1891  | 10472  | ZNF238  | 0.0777 | 1.1958 |
| 31027 | B10 | 15044 | 388695 | LYSMD1  | 0.0777 | 1.1958 |
| 31040 | H07 | 10119 | 23347  | SMCHD1  | 0.0777 | 1.1959 |
| 31045 | H07 | 2489  | 25896  | INTS7   | 0.0777 | 1.1959 |
| 51035 | C01 | 53802 | 137886 | UBXN2B  | 0.0777 | 1.1960 |
| 11060 | G11 | 4465  | 10900  | RUNDC3A | 0.0777 | 1.1960 |
| 11028 | D07 | 8848  | 65056  | GPBP1   | 0.0777 | 1.1960 |
| 11060 | D06 | 4023  | 26580  | BSCL2   | 0.0778 | 1.1962 |
| 31043 | A03 | 7680  | 84134  | TOMM40L | 0.0778 | 1.1962 |
| 51014 | B02 | 55072 | 164045 | HFM1    | 0.0779 | 1.1964 |
| 11052 | H10 | 8645  | 55193  | PBRM1   | 0.0779 | 1.1965 |
| 31009 | A08 | 11430 | 4154   | MBNL1   | 0.0779 | 1.1965 |
| 11078 | F06 | 1334  | 79665  | DHX40   | 0.0779 | 1.1965 |
| 11030 | A09 | 7294  | 9075   | CLDN2   | 0.0779 | 1.1966 |
| 11019 | E03 | 6095  | NA     | NA      | 0.0780 | 1.1966 |
| 51034 | C10 | 54098 | 26333  | OR7A17  | 0.0780 | 1.1966 |
| 11038 | A03 | 4988  | 81033  | KCNH6   | 0.0781 | 1.1969 |
| 11055 | B09 | 67    | 9124   | PDLIM1  | 0.0781 | 1.1970 |
| 11044 | C03 | 4554  | 27095  | TRAPPC3 | 0.0781 | 1.1970 |
| 51005 | E04 | 53804 | 54363  | HAO1    | 0.0781 | 1.1971 |
| 11057 | C12 | 10247 | 2898   | GRIK2   | 0.0781 | 1.1971 |
| 11009 | B03 | 3607  | 8459   | TPST2   | 0.0782 | 1.1972 |
| 31004 | G09 | 11055 | 126299 | ZNF428  | 0.0782 | 1.1972 |
| 11076 | E04 | 3738  | 7360   | UGP2    | 0.0782 | 1.1973 |
| 11048 | F06 | 5478  | 10412  | NSA2    | 0.0782 | 1.1973 |
| 11065 | A02 | 6006  | 9784   | SNX17   | 0.0782 | 1.1974 |
| 11045 | D12 | 9371  | 25911  | DPCD    | 0.0783 | 1.1974 |
| 51013 | G10 | 52925 | 2244   | FGB     | 0.0783 | 1.1975 |
| 11064 | E08 | 2189  | 2565   | GABRG1  | 0.0783 | 1.1976 |

|       |     |       |           |          |        |        |
|-------|-----|-------|-----------|----------|--------|--------|
| 11076 | F08 | 1456  | 5128      | CDK17    | 0.0783 | 1.1977 |
| 11026 | F05 | 8557  | 54432     | YIPF1    | 0.0784 | 1.1978 |
| 11066 | A05 | 2935  | 183       | AGT      | 0.0784 | 1.1979 |
| 11056 | A01 | 2351  | 63974     | NEUROD6  | 0.0784 | 1.1979 |
| 11066 | B05 | 3013  | 81539     | SLC38A1  | 0.0784 | 1.1980 |
| 11066 | A04 | 7246  | 54475     | NLE1     | 0.0784 | 1.1980 |
| 11086 | B03 | 8720  | 9360      | PPIG     | 0.0785 | 1.1980 |
| 11059 | H01 | 1774  | 80817     | KIAA1712 | 0.0785 | 1.1981 |
| 11074 | E04 | 5494  | 325       | APCS     | 0.0785 | 1.1982 |
| 11056 | H02 | 9569  | 100131755 | ARMCX4   | 0.0785 | 1.1982 |
| 11019 | F06 | 6302  | 23597     | ACOT9    | 0.0786 | 1.1983 |
| 51023 | G01 | 56091 | 55291     | PPP6R3   | 0.0786 | 1.1983 |
| 31042 | G11 | 5330  | 51292     | GMPR2    | 0.0786 | 1.1984 |
| 11052 | F08 | 6139  | 54557     | SGTB     | 0.0787 | 1.1987 |
| 51033 | F09 | 54870 | 388325    | C17orf87 | 0.0787 | 1.1987 |
| 11062 | A06 | 206   | 8907      | AP1M1    | 0.0787 | 1.1987 |
| 51021 | H10 | 55847 | 11226     | GALNT6   | 0.0787 | 1.1988 |
| 11041 | D01 | 5733  | 81853     | TMEM14B  | 0.0788 | 1.1988 |
| 31044 | D11 | 847   | 6758      | SSX5     | 0.0788 | 1.1988 |
| 11025 | A04 | 9934  | 3156      | HMGCR    | 0.0788 | 1.1989 |
| 11038 | G07 | 2323  | 201627    | FAM116A  | 0.0788 | 1.1989 |
| 11053 | G06 | 1338  | 83447     | SLC25A31 | 0.0788 | 1.1989 |
| 51028 | G10 | 55324 | 23650     | TRIM29   | 0.0788 | 1.1989 |
| 51032 | E03 | 55601 | 727956    | SDHAP2   | 0.0788 | 1.1990 |
| 11085 | F10 | 6677  | 113675    | SDSL     | 0.0789 | 1.1992 |
| 31017 | D09 | 12867 | 497661    | C18orf32 | 0.0789 | 1.1992 |
| 31014 | F05 | 11839 | 171017    | ZNF384   | 0.0789 | 1.1993 |
| 11002 | D04 | 10080 | 56259     | CTNBL1   | 0.0789 | 1.1993 |
| 31008 | B10 | 11579 | 3221      | HOXC4    | 0.0789 | 1.1994 |
| 11060 | F04 | 8133  | 127435    | PODN     | 0.0790 | 1.1994 |
| 31014 | G08 | 12296 | 64087     | MCCC2    | 0.0790 | 1.1994 |
| 31013 | D10 | 12091 | 84942     | WDR73    | 0.0790 | 1.1995 |
| 31018 | D06 | 13197 | 9204      | ZMYM6    | 0.0790 | 1.1996 |
| 11018 | D05 | 7220  | 64951     | MRPS24   | 0.0790 | 1.1996 |
| 11061 | B09 | 10150 | 152992    | C4orf23  | 0.0790 | 1.1996 |
| 11007 | E08 | 5448  | 1646      | AKR1C2   | 0.0791 | 1.1997 |
| 31001 | D05 | 10806 | 1442      | CSH1     | 0.0792 | 1.2000 |
| 11021 | D06 | 5969  | 11212     | PROSC    | 0.0792 | 1.2000 |
| 51010 | C04 | 54729 | 56129     | PCDHB7   | 0.0792 | 1.2001 |
| 31045 | D08 | 6758  | 28989     | METTL11A | 0.0793 | 1.2003 |
| 51026 | C07 | 53140 | 9183      | ZW10     | 0.0793 | 1.2003 |
| 11077 | D02 | 2991  | 1838      | DTNB     | 0.0793 | 1.2004 |
| 11070 | B09 | 9667  | 8790      | FPGT     | 0.0793 | 1.2004 |
| 31008 | G09 | 11360 | 254013    | C12orf72 | 0.0794 | 1.2005 |

|       |     |       |        |          |        |        |
|-------|-----|-------|--------|----------|--------|--------|
| 11045 | H01 | 266   | 23682  | RAB38    | 0.0794 | 1.2005 |
| 51034 | C05 | 53633 | 83881  | MIXL1    | 0.0794 | 1.2005 |
| 11052 | F07 | 5226  | 80003  | PCNXL2   | 0.0794 | 1.2006 |
| 11047 | B09 | 2176  | 55466  | DNAJA4   | 0.0794 | 1.2007 |
| 11005 | G01 | 2328  | 158521 | FMR1NB   | 0.0794 | 1.2007 |
| 31005 | D08 | 11079 | 139628 | FOXR2    | 0.0794 | 1.2007 |
| 11019 | G03 | 7192  | 112495 | GTF3C6   | 0.0795 | 1.2008 |
| 51026 | A12 | 53151 | 604    | BCL6     | 0.0795 | 1.2008 |
| 51030 | F04 | 55421 | 2630   | GBAP1    | 0.0795 | 1.2008 |
| 11084 | D01 | 6459  | 1392   | CRH      | 0.0796 | 1.2010 |
| 31023 | C06 | 13486 | 116143 | WDR92    | 0.0796 | 1.2011 |
| 11034 | D09 | 9596  | 945    | CD33     | 0.0796 | 1.2011 |
| 51012 | E05 | 53019 | 1262   | CNGA4    | 0.0796 | 1.2011 |
| 11056 | B12 | 8737  | 93594  | WDR67    | 0.0796 | 1.2013 |
| 31045 | F03 | 5099  | 11253  | MAN1B1   | 0.0797 | 1.2013 |
| 11046 | A09 | 1440  | 84066  | C1orf49  | 0.0797 | 1.2013 |
| 51033 | A03 | 55615 | 89838  | FAM7A1   | 0.0797 | 1.2014 |
| 11053 | F11 | 978   | 266740 | MAGEA2B  | 0.0797 | 1.2015 |
| 31008 | B12 | 11742 | 114898 | C1QTNF2  | 0.0797 | 1.2015 |
| 11017 | F02 | 6866  | 4192   | MDK      | 0.0799 | 1.2019 |
| 31037 | E09 | 14093 | 51626  | DYNC2LI1 | 0.0799 | 1.2019 |
| 11032 | H10 | 8517  | 200185 | KRTCAP2  | 0.0800 | 1.2021 |
| 11027 | E03 | 3670  | 54935  | DUSP23   | 0.0800 | 1.2022 |
| 31004 | C04 | 10546 | 9699   | RIMS2    | 0.0800 | 1.2022 |
| 31040 | F05 | 9474  | 135932 | TMEM139  | 0.0800 | 1.2023 |
| 31001 | D01 | 10733 | 125476 | INO80C   | 0.0800 | 1.2023 |
| 11026 | E03 | 3349  | 6632   | SNRPD1   | 0.0800 | 1.2023 |
| 51012 | D06 | 52877 | 6493   | SIM2     | 0.0801 | 1.2024 |
| 11015 | A02 | 8835  | 50854  | C6orf48  | 0.0801 | 1.2025 |
| 31003 | F03 | 10262 | 79871  | RPAP2    | 0.0801 | 1.2026 |
| 51028 | F01 | 56392 | 4883   | NPR3     | 0.0801 | 1.2026 |
| 11047 | B02 | 3623  | 9363   | RAB33A   | 0.0801 | 1.2026 |
| 31017 | H01 | 12507 | 138311 | FAM69B   | 0.0802 | 1.2027 |
| 11048 | F03 | 1214  | 386618 | KCTD4    | 0.0802 | 1.2028 |
| 51024 | G02 | 56344 | 26019  | UPF2     | 0.0802 | 1.2028 |
| 31043 | E01 | 5298  | 55716  | LMBR1L   | 0.0802 | 1.2029 |
| 51009 | H05 | 54244 | 8828   | NRP2     | 0.0803 | 1.2030 |
| 51014 | A01 | 54905 | 9971   | NR1H4    | 0.0803 | 1.2030 |
| 31026 | C07 | 13794 | 2678   | GGT1     | 0.0803 | 1.2031 |
| 51024 | H04 | 56074 | 8661   | EIF3A    | 0.0803 | 1.2031 |
| 51010 | A01 | 53108 | 10677  | AVIL     | 0.0803 | 1.2032 |
| 51020 | F12 | 56606 | 7779   | SLC30A1  | 0.0803 | 1.2032 |
| 11039 | B08 | 6907  | 211    | ALAS1    | 0.0803 | 1.2032 |
| 11087 | F08 | 6331  | 54908  | CCDC99   | 0.0804 | 1.2033 |

|       |     |       |        |           |        |        |
|-------|-----|-------|--------|-----------|--------|--------|
| 11061 | F01 | 1056  | 1360   | CPB1      | 0.0804 | 1.2035 |
| 11025 | D05 | 4485  | 10902  | BRD8      | 0.0804 | 1.2035 |
| 11047 | D01 | 3836  | 9218   | VAPA      | 0.0805 | 1.2035 |
| 51008 | D09 | 55160 | 2904   | GRIN2B    | 0.0805 | 1.2035 |
| 51008 | D03 | 54229 | 196883 | ADCY4     | 0.0805 | 1.2036 |
| 31026 | C11 | 13862 | 54429  | TAS2R5    | 0.0805 | 1.2036 |
| 31006 | F09 | 10819 | 203523 | ZNF449    | 0.0805 | 1.2037 |
| 51020 | G05 | 55803 | 266697 | POM121L4P | 0.0805 | 1.2037 |
| 31024 | A12 | 13735 | 2869   | GRK5      | 0.0805 | 1.2037 |
| 51001 | C10 | 52577 | 84518  | CNFN      | 0.0806 | 1.2038 |
| 51024 | B06 | 56067 | 8648   | NCOA1     | 0.0806 | 1.2039 |
| 51030 | E10 | 53276 | 387521 | TMEM189   | 0.0806 | 1.2039 |
| 11044 | C04 | 24    | 378    | ARF4      | 0.0806 | 1.2040 |
| 11020 | E06 | 5792  | 965    | CD58      | 0.0806 | 1.2041 |
| 11049 | D05 | 4056  | 6811   | STX5      | 0.0807 | 1.2041 |
| 31003 | D12 | 10410 | 139065 | SLITRK4   | 0.0807 | 1.2042 |
| 11019 | C06 | 6870  | 79643  | CHMP6     | 0.0807 | 1.2042 |
| 51022 | F11 | 56324 | 9767   | PHF16     | 0.0807 | 1.2042 |
| 11021 | B07 | 9174  | 10781  | ZNF266    | 0.0807 | 1.2042 |
| 11006 | D08 | 1132  | 2823   | GPM6A     | 0.0807 | 1.2043 |
| 11011 | H02 | 6775  | 51776  | ZAK       | 0.0807 | 1.2043 |
| 11052 | B06 | 4437  | 57407  | NMRAL1    | 0.0808 | 1.2044 |
| 11064 | G09 | 7341  | 51004  | COQ6      | 0.0808 | 1.2044 |
| 11069 | H05 | 2441  | 146956 | EME1      | 0.0808 | 1.2045 |
| 11047 | E11 | 3741  | 5687   | PSMA6     | 0.0808 | 1.2045 |
| 11087 | H06 | 3311  | 29803  | REPIN1    | 0.0808 | 1.2045 |
| 31027 | A08 | 15040 | 3613   | IMPA2     | 0.0808 | 1.2045 |
| 11052 | E08 | 5219  | 10273  | STUB1     | 0.0808 | 1.2046 |
| 11086 | F07 | 7667  | 128637 | TBC1D20   | 0.0809 | 1.2047 |
| 51017 | E04 | 55987 | 285205 | LOC285205 | 0.0809 | 1.2049 |
| 11046 | E01 | 3856  | 7345   | UCHL1     | 0.0809 | 1.2049 |
| 11006 | F10 | 8370  | 2214   | FCGR3A    | 0.0809 | 1.2049 |
| 31014 | F01 | 12062 | 6605   | SMARCE1   | 0.0809 | 1.2049 |
| 51011 | C11 | 55124 | 57613  | KIAA1467  | 0.0810 | 1.2049 |
| 11081 | C06 | 9476  | 7177   | TPSAB1    | 0.0810 | 1.2051 |
| 31010 | B03 | 11419 | 143425 | SYT9      | 0.0810 | 1.2052 |
| 11009 | H08 | 5379  | 23410  | SIRT3     | 0.0811 | 1.2053 |
| 11002 | H06 | 10038 | 27294  | DHDH      | 0.0811 | 1.2053 |
| 11007 | H06 | 9182  | 64866  | CDCP1     | 0.0811 | 1.2053 |
| 11054 | A03 | 3891  | 4792   | NFKBIA    | 0.0811 | 1.2054 |
| 11008 | A10 | 49    | 11222  | MRPL3     | 0.0811 | 1.2054 |
| 11065 | E01 | 9860  | 817    | CAMK2D    | 0.0812 | 1.2055 |
| 11048 | B01 | 141   | 55374  | TMCO6     | 0.0812 | 1.2056 |
| 51017 | F10 | 55767 | 10214  | SSX3      | 0.0812 | 1.2056 |



|       |     |       |        |          |        |        |
|-------|-----|-------|--------|----------|--------|--------|
| 51009 | E10 | 54068 | 285966 | FAM115C  | 0.0813 | 1.2059 |
| 11057 | C04 | 5080  | 79814  | AGMAT    | 0.0813 | 1.2060 |
| 31020 | G07 | 12862 | 10069  | RWDD2B   | 0.0814 | 1.2062 |
| 11069 | E01 | 9276  | 10665  | C6orf10  | 0.0814 | 1.2062 |
| 11053 | H11 | 1006  | 4103   | MAGEA4   | 0.0814 | 1.2062 |
| 11076 | C09 | 1863  | 10254  | STAM2    | 0.0815 | 1.2063 |
| 31003 | G10 | 10323 | 26013  | L3MBTL   | 0.0815 | 1.2063 |
| 11011 | E04 | 5324  | 10948  | STARD3   | 0.0815 | 1.2064 |
| 51023 | D02 | 55737 | 27241  | BBS9     | 0.0815 | 1.2064 |
| 51024 | H02 | 53920 | 2903   | GRIN2A   | 0.0815 | 1.2064 |
| 11013 | G05 | 5426  | 113878 | DTX2     | 0.0815 | 1.2064 |
| 51005 | F02 | 53674 | 7481   | WNT11    | 0.0816 | 1.2067 |
| 11055 | G05 | 6181  | 51665  | ASB1     | 0.0817 | 1.2070 |
| 11070 | H08 | 7131  | 10318  | TNIP1    | 0.0817 | 1.2070 |
| 31003 | D11 | 10592 | 7770   | ZNF227   | 0.0817 | 1.2070 |
| 11052 | F12 | 2187  | 134187 | POU5F2   | 0.0817 | 1.2070 |
| 51001 | H05 | 53420 | 339210 | C17orf67 | 0.0818 | 1.2072 |
| 31028 | G06 | 15065 | 10018  | BCL2L11  | 0.0818 | 1.2073 |
| 11059 | G06 | 1521  | 169966 | FAM46D   | 0.0818 | 1.2073 |
| 51010 | H08 | 53054 | 5321   | PLA2G4A  | 0.0819 | 1.2074 |
| 11047 | G06 | 9203  | 83876  | MRO      | 0.0820 | 1.2077 |
| 11038 | H05 | 7209  | 80221  | ACSF2    | 0.0820 | 1.2077 |
| 31027 | B06 | 13950 | 56603  | CYP26B1  | 0.0820 | 1.2077 |
| 31003 | A01 | 10589 | 85413  | SLC22A16 | 0.0820 | 1.2079 |
| 11043 | D12 | 6249  | 55190  | NUDT11   | 0.0820 | 1.2079 |
| 51011 | B01 | 54488 | 118461 | C10orf71 | 0.0820 | 1.2079 |
| 11037 | H05 | 9590  | 3493   | IGHA1    | 0.0820 | 1.2079 |
| 11034 | D11 | 6303  | 26762  | HAVCR1   | 0.0821 | 1.2080 |
| 11073 | A05 | 4185  | 6827   | SUPT4H1  | 0.0821 | 1.2081 |
| 51013 | G11 | 53727 | 5734   | PTGER4   | 0.0822 | 1.2084 |
| 31039 | C01 | 2517  | 5447   | POR      | 0.0822 | 1.2084 |
| 51024 | G09 | 55143 | 9044   | BTAF1    | 0.0822 | 1.2085 |
| 11027 | H08 | 2699  | 80184  | CEP290   | 0.0822 | 1.2085 |
| 51009 | H08 | 54210 | 1185   | CLCN6    | 0.0822 | 1.2085 |
| 31008 | G04 | 11469 | 138428 | PTRH1    | 0.0823 | 1.2086 |
| 51023 | G09 | 55898 | 1829   | DSG2     | 0.0823 | 1.2087 |
| 51026 | H02 | 55475 | 23149  | FCHO1    | 0.0823 | 1.2087 |
| 51023 | A07 | 55892 | 57835  | SLC4A5   | 0.0823 | 1.2088 |
| 11068 | E02 | 3048  | 5152   | PDE9A    | 0.0824 | 1.2089 |
| 11030 | B06 | 1094  | 286451 | YIPF6    | 0.0824 | 1.2089 |
| 11032 | B01 | 9095  | 7184   | HSP90B1  | 0.0825 | 1.2091 |
| 31004 | E10 | 10989 | 65108  | MARCKSL1 | 0.0825 | 1.2092 |
| 11052 | B04 | 1924  | 133383 | C5orf35  | 0.0825 | 1.2092 |
| 11055 | G08 | 3278  | 9798   | KIAA0174 | 0.0825 | 1.2093 |

|       |     |       |        |           |        |        |
|-------|-----|-------|--------|-----------|--------|--------|
| 11019 | E07 | 3433  | 10920  | COPS8     | 0.0826 | 1.2094 |
| 11024 | C03 | 10037 | 11201  | POLI      | 0.0826 | 1.2096 |
| 11073 | C03 | 3757  | 6285   | S100B     | 0.0827 | 1.2096 |
| 11009 | G06 | 603   | 29789  | OLA1      | 0.0827 | 1.2097 |
| 31011 | B12 | 12155 | 208    | AKT2      | 0.0827 | 1.2098 |
| 31008 | F09 | 11516 | 118881 | COMTD1    | 0.0827 | 1.2099 |
| 51023 | H05 | 53772 | 1180   | CLCN1     | 0.0828 | 1.2099 |
| 31013 | C12 | 11987 | 64149  | C17orf75  | 0.0828 | 1.2099 |
| 11041 | B10 | 3400  | 27018  | NGFRAP1   | 0.0828 | 1.2100 |
| 11077 | D08 | 813   | 51428  | DDX41     | 0.0828 | 1.2100 |
| 31006 | H05 | 10978 | 55500  | ETNK1     | 0.0828 | 1.2100 |
| 51008 | H10 | 53927 | 25885  | POLR1A    | 0.0828 | 1.2100 |
| 11065 | D11 | 5807  | 10486  | CAP2      | 0.0829 | 1.2102 |
| 31044 | H01 | 3660  | 11031  | RAB31     | 0.0829 | 1.2102 |
| 11007 | G09 | 6337  | 9522   | SCAMP1    | 0.0829 | 1.2104 |
| 11019 | F12 | 6600  | 57111  | RAB25     | 0.0829 | 1.2104 |
| 31042 | F10 | 9023  | 1388   | ATF6B     | 0.0829 | 1.2104 |
| 31012 | A11 | 12043 | 23594  | ORC6L     | 0.0829 | 1.2104 |
| 11068 | A07 | 2352  | 3738   | KCNA3     | 0.0830 | 1.2105 |
| 51022 | B04 | 56164 | 3270   | HRC       | 0.0830 | 1.2106 |
| 31039 | G08 | 1029  | 3217   | HOXB7     | 0.0830 | 1.2106 |
| 11006 | C02 | 8064  | 201931 | TMEM192   | 0.0830 | 1.2107 |
| 11081 | E02 | 4304  | NA     | NA        | 0.0831 | 1.2109 |
| 31001 | B07 | 10302 | 9702   | CEP57     | 0.0831 | 1.2109 |
| 51022 | G07 | 56815 | 155054 | ZNF425    | 0.0831 | 1.2110 |
| 51005 | E07 | 53983 | 64090  | GAL3ST2   | 0.0832 | 1.2111 |
| 31033 | E09 | 14997 | 8028   | MLLT10    | 0.0833 | 1.2113 |
| 31026 | C10 | 13905 | 63036  | CELA2A    | 0.0833 | 1.2114 |
| 11016 | A07 | 6661  | 151534 | LOC151534 | 0.0833 | 1.2115 |
| 11057 | E11 | 590   | 55007  | FAM118A   | 0.0833 | 1.2115 |
| 11032 | E04 | 6241  | 648    | BMI1      | 0.0834 | 1.2116 |
| 51008 | D08 | 55169 | 25998  | IBTK      | 0.0834 | 1.2116 |
| 11026 | C01 | 1257  | 135154 | C6orf57   | 0.0834 | 1.2116 |
| 51012 | D07 | 53841 | 124872 | B4GALNT2  | 0.0834 | 1.2119 |
| 31043 | B07 | 6210  | 1813   | DRD2      | 0.0835 | 1.2120 |
| 51033 | B03 | 55369 | 554226 | ANKRD30BL | 0.0835 | 1.2120 |
| 31020 | G04 | 12939 | 79568  | C2orf47   | 0.0835 | 1.2121 |
| 31019 | D05 | 12916 | 29992  | PILRA     | 0.0835 | 1.2121 |
| 31033 | F03 | 14729 | 10762  | NUP50     | 0.0836 | 1.2122 |
| 51025 | E02 | 53355 | 56163  | RNF17     | 0.0836 | 1.2122 |
| 11067 | C07 | 6712  | 6675   | UAP1      | 0.0836 | 1.2122 |
| 51034 | C11 | 53643 | 9501   | RPH3AL    | 0.0836 | 1.2123 |
| 11006 | C06 | 8273  | 79843  | FAM124B   | 0.0836 | 1.2123 |
| 11014 | G04 | 86    | 114928 | GPRASP2   | 0.0836 | 1.2123 |

|       |     |       |        |          |        |        |
|-------|-----|-------|--------|----------|--------|--------|
| 11076 | E09 | 1294  | 64396  | GMCLIL   | 0.0837 | 1.2126 |
| 11069 | G05 | 5066  | 9531   | BAG3     | 0.0838 | 1.2128 |
| 31003 | G05 | 10306 | 2729   | GCLC     | 0.0838 | 1.2128 |
| 51035 | F01 | 54576 | 911    | CD1C     | 0.0838 | 1.2129 |
| 31009 | H11 | 11577 | 51365  | PLA1A    | 0.0839 | 1.2130 |
| 51034 | E06 | 54163 | 7140   | TNNT3    | 0.0839 | 1.2131 |
| 31002 | A02 | 10250 | 5093   | PCBP1    | 0.0839 | 1.2131 |
| 11034 | C08 | 975   | 6838   | SURF6    | 0.0840 | 1.2133 |
| 31044 | G04 | 3326  | 8522   | GAS7     | 0.0840 | 1.2133 |
| 51022 | D04 | 56188 | 6252   | RTN1     | 0.0840 | 1.2134 |
| 11052 | A03 | 3692  | 27343  | POLL     | 0.0840 | 1.2134 |
| 51022 | B06 | 56185 | 9844   | ELMO1    | 0.0841 | 1.2136 |
| 11014 | A05 | 4277  | 50853  | VILL     | 0.0841 | 1.2136 |
| 31023 | H02 | 13737 | 3514   | IGKC     | 0.0841 | 1.2137 |
| 11075 | E02 | 2063  | 83988  | NCALD    | 0.0841 | 1.2137 |
| 11038 | G10 | 2114  | 129563 | DIS3L2   | 0.0841 | 1.2138 |
| 31017 | E04 | 12518 | 126321 | C19orf28 | 0.0842 | 1.2139 |
| 11003 | F07 | 6205  | 57095  | C1orf128 | 0.0842 | 1.2139 |
| 31044 | C10 | 8822  | 84896  | ATAD1    | 0.0842 | 1.2139 |
| 11034 | H10 | 2271  | 114299 | PALM2    | 0.0842 | 1.2140 |
| 51008 | E06 | 54295 | 27127  | SMC1B    | 0.0842 | 1.2140 |
| 11051 | F02 | 3642  | 8775   | NAPA     | 0.0843 | 1.2142 |
| 11061 | D11 | 9871  | 10880  | ACTL7B   | 0.0843 | 1.2144 |
| 11065 | A11 | 2031  | 3169   | FOXA1    | 0.0844 | 1.2145 |
| 11032 | H08 | 8257  | 89822  | KCNK17   | 0.0844 | 1.2146 |
| 11073 | H04 | 4285  | 80763  | C12orf39 | 0.0844 | 1.2146 |
| 51026 | C12 | 53269 | 80760  | ITIH5    | 0.0844 | 1.2146 |
| 11054 | E06 | 7423  | 8644   | AKR1C3   | 0.0844 | 1.2146 |
| 11049 | E12 | 2611  | 83401  | ELOVL3   | 0.0845 | 1.2148 |
| 11055 | H10 | 9296  | 23632  | CA14     | 0.0845 | 1.2148 |
| 31022 | D10 | 13751 | 4063   | LY9      | 0.0845 | 1.2148 |
| 31020 | F10 | 12965 | 9507   | ADAMTS4  | 0.0845 | 1.2148 |
| 51028 | E06 | 55666 | 4148   | MATN3    | 0.0845 | 1.2149 |
| 11026 | D06 | 8131  | 6843   | VAMP1    | 0.0846 | 1.2149 |
| 51033 | G11 | 54376 | 80112  | WBSCR23  | 0.0846 | 1.2151 |
| 31033 | G10 | 14833 | 1470   | CST2     | 0.0846 | 1.2151 |
| 11068 | G05 | 8940  | 84976  | DISP1    | 0.0847 | 1.2153 |
| 11027 | G10 | 680   | 6883   | TAF12    | 0.0847 | 1.2153 |
| 31023 | E11 | 13590 | 259    | AMBP     | 0.0847 | 1.2154 |
| 11047 | G02 | 995   | 7170   | TPM3     | 0.0847 | 1.2154 |
| 51010 | B12 | 53768 | 158405 | KIAA1958 | 0.0847 | 1.2155 |
| 11021 | C07 | 3593  | 10549  | PRDX4    | 0.0848 | 1.2155 |
| 11043 | F03 | 6356  | 8557   | TCAP     | 0.0848 | 1.2156 |
| 11029 | A06 | 6781  | 54981  | C9orf95  | 0.0848 | 1.2156 |

|       |     |       |        |          |        |        |
|-------|-----|-------|--------|----------|--------|--------|
| 11077 | F09 | 1321  | 148254 | ZNF555   | 0.0849 | 1.2159 |
| 51010 | F04 | 52716 | 84215  | ZNF541   | 0.0849 | 1.2159 |
| 11073 | A11 | 1761  | 143379 | C10orf82 | 0.0849 | 1.2160 |
| 31030 | D09 | 14326 | 25903  | OLFML2B  | 0.0849 | 1.2160 |
| 11068 | F05 | 450   | 51310  | SLC22A17 | 0.0850 | 1.2161 |
| 11086 | H08 | 6298  | 55002  | TMCO3    | 0.0850 | 1.2162 |
| 11069 | E10 | 7105  | 10636  | RGS14    | 0.0850 | 1.2163 |
| 11073 | A01 | 8883  | 51507  | C20orf43 | 0.0850 | 1.2163 |
| 31005 | B08 | 11122 | 91522  | COL23A1  | 0.0851 | 1.2163 |
| 31045 | F06 | 9367  | 221468 | TMEM217  | 0.0851 | 1.2164 |
| 11069 | B08 | 2655  | 23411  | SIRT1    | 0.0851 | 1.2165 |
| 11046 | C07 | 3921  | 10972  | TMED10   | 0.0851 | 1.2165 |
| 11052 | G02 | 3639  | 23462  | HEY1     | 0.0852 | 1.2167 |
| 11047 | G03 | 1201  | 140838 | NANP     | 0.0852 | 1.2168 |
| 11058 | D08 | 4278  | 80270  | HSD3B7   | 0.0852 | 1.2168 |
| 51024 | G05 | 55217 | 11073  | TOPBP1   | 0.0852 | 1.2168 |
| 31031 | A11 | 14582 | 10331  | B3GNT3   | 0.0852 | 1.2169 |
| 11035 | F10 | 3723  | 9266   | CYTH2    | 0.0853 | 1.2171 |
| 11015 | A01 | 5616  | 6588   | SLN      | 0.0853 | 1.2171 |
| 51030 | A11 | 56470 | 254240 | BPIL2    | 0.0854 | 1.2172 |
| 11064 | G10 | 7678  | 634    | CEACAM1  | 0.0854 | 1.2174 |
| 11057 | A09 | 4570  | 27122  | DKK3     | 0.0855 | 1.2175 |
| 31034 | C06 | 14986 | 50717  | DCAF8    | 0.0855 | 1.2175 |
| 11030 | B04 | 6748  | 9982   | FGFBP1   | 0.0856 | 1.2179 |
| 11075 | F02 | 3936  | 29105  | C16orf80 | 0.0856 | 1.2179 |
| 51013 | G04 | 54550 | 203062 | TSNARE1  | 0.0856 | 1.2179 |
| 11050 | B08 | 161   | 54708  | MARCH5   | 0.0857 | 1.2180 |
| 11060 | A11 | 8655  | 7092   | TLL1     | 0.0857 | 1.2181 |
| 11047 | A03 | 4324  | 55116  | TMEM39B  | 0.0857 | 1.2181 |
| 11030 | G06 | 4702  | 6191   | RPS4X    | 0.0857 | 1.2181 |
| 11086 | B05 | 6199  | 80142  | PTGES2   | 0.0857 | 1.2182 |
| 11076 | C12 | 3852  | 10963  | STIP1    | 0.0858 | 1.2183 |
| 11018 | B09 | 3763  | 55004  | C11orf59 | 0.0858 | 1.2184 |
| 11014 | D08 | 4035  | 4174   | MCM5     | 0.0858 | 1.2185 |
| 11021 | F06 | 3557  | 481    | ATP1B1   | 0.0859 | 1.2187 |
| 11040 | A05 | 8925  | 27348  | TOR1B    | 0.0859 | 1.2187 |
| 51005 | F03 | 54492 | 2848   | GPR25    | 0.0860 | 1.2191 |
| 51005 | A08 | 54311 | 254173 | TTLL10   | 0.0861 | 1.2192 |
| 51004 | E09 | 53842 | 6386   | SDCBP    | 0.0861 | 1.2193 |
| 11037 | A11 | 6862  | 53838  | C11orf24 | 0.0861 | 1.2194 |
| 11086 | F09 | 1637  | 25984  | KRT23    | 0.0861 | 1.2194 |
| 51015 | B02 | 52806 | 139422 | MAGEB10  | 0.0862 | 1.2194 |
| 51002 | E02 | 54470 | 130355 | C2orf76  | 0.0862 | 1.2196 |
| 11012 | F07 | 248   | 55716  | LMBR1L   | 0.0862 | 1.2196 |

|       |     |       |        |          |        |        |
|-------|-----|-------|--------|----------|--------|--------|
| 11053 | A06 | 1206  | 51534  | VTA1     | 0.0862 | 1.2196 |
| 11035 | B05 | 2452  | 1116   | CHI3L1   | 0.0862 | 1.2197 |
| 11043 | F12 | 6549  | 80218  | NAA50    | 0.0862 | 1.2197 |
| 11064 | F03 | 1322  | 27098  | CLUL1    | 0.0863 | 1.2197 |
| 51035 | B06 | 55000 | 441476 | C9orf173 | 0.0863 | 1.2197 |
| 51002 | E06 | 55753 | 8352   | HIST1H3C | 0.0863 | 1.2198 |
| 51004 | C10 | 56534 | 653437 | AQP12B   | 0.0863 | 1.2198 |
| 11050 | C02 | 6258  | 91523  | FAM113B  | 0.0863 | 1.2198 |
| 11027 | F06 | 7926  | 51155  | HN1      | 0.0863 | 1.2199 |
| 11073 | B01 | 4609  | 79086  | C19orf42 | 0.0863 | 1.2200 |
| 11047 | F12 | 2727  | 29090  | C18orf55 | 0.0863 | 1.2200 |
| 51002 | A10 | 52655 | 5355   | PLP2     | 0.0864 | 1.2200 |
| 11026 | G09 | 791   | 84707  | BEX2     | 0.0865 | 1.2203 |
| 11063 | E05 | 8454  | 161198 | CLEC14A  | 0.0865 | 1.2204 |
| 11045 | H08 | 131   | 1906   | EDN1     | 0.0865 | 1.2205 |
| 11039 | B01 | 1931  | 79807  | GSTCD    | 0.0866 | 1.2205 |
| 31007 | G01 | 10877 | 348327 | ZNF530   | 0.0866 | 1.2206 |
| 11011 | E07 | 7523  | 3646   | EIF3E    | 0.0866 | 1.2206 |
| 11069 | D05 | 5048  | 22803  | XRN2     | 0.0866 | 1.2207 |
| 11022 | D09 | 7507  | 3185   | HNRNPF   | 0.0866 | 1.2208 |
| 31016 | E07 | 12809 | 57157  | PHTF2    | 0.0866 | 1.2208 |
| 31037 | F05 | 14060 | 10648  | SCGB1D1  | 0.0866 | 1.2208 |
| 11051 | D12 | 2615  | 415117 | STX19    | 0.0867 | 1.2209 |
| 51021 | E07 | 56638 | 26147  | PHF19    | 0.0867 | 1.2210 |
| 11044 | E04 | 249   | 9519   | TBPL1    | 0.0868 | 1.2212 |
| 51014 | E08 | 52695 | 89832  | CHRFAM7A | 0.0868 | 1.2213 |
| 51034 | D06 | 55083 | 401260 | FLJ41649 | 0.0868 | 1.2214 |
| 31010 | C01 | 11810 | 9942   | XYLB     | 0.0869 | 1.2214 |
| 31003 | C11 | 10428 | 256309 | CCDC110  | 0.0869 | 1.2215 |
| 31037 | F03 | 12642 | 23263  | MCF2L    | 0.0869 | 1.2215 |
| 11021 | F09 | 3220  | 8704   | B4GALT2  | 0.0870 | 1.2217 |
| 31003 | G04 | 10700 | 23305  | ACSL6    | 0.0870 | 1.2218 |
| 51025 | E05 | 53319 | 63925  | ZNF335   | 0.0870 | 1.2219 |
| 51030 | A04 | 56937 | 284611 | FAM102B  | 0.0870 | 1.2219 |
| 11045 | C05 | 6443  | 55173  | MRPS10   | 0.0870 | 1.2219 |
| 11034 | B07 | 6033  | 57488  | ESYT2    | 0.0871 | 1.2220 |
| 11077 | F02 | 4443  | 440    | ASNS     | 0.0871 | 1.2220 |
| 11025 | A08 | 9615  | 10808  | HSPH1    | 0.0871 | 1.2221 |
| 31003 | F11 | 10621 | 54413  | NLGN3    | 0.0871 | 1.2221 |
| 51002 | A09 | 54860 | 388722 | C1orf53  | 0.0871 | 1.2221 |
| 11054 | G08 | 3066  | 25979  | DHRS7B   | 0.0871 | 1.2222 |
| 31021 | F01 | 13072 | 6402   | SELL     | 0.0872 | 1.2222 |
| 11052 | D06 | 4108  | 10166  | SLC25A15 | 0.0872 | 1.2222 |
| 51031 | B02 | 56153 | 339366 | ADAMTSL5 | 0.0872 | 1.2223 |

|       |     |       |        |           |        |        |
|-------|-----|-------|--------|-----------|--------|--------|
| 11026 | B03 | 7466  | 79145  | CHCHD7    | 0.0872 | 1.2224 |
| 11013 | A12 | 4741  | 9128   | PRPF4     | 0.0872 | 1.2225 |
| 31007 | C06 | 10841 | 130271 | PLEKHH2   | 0.0872 | 1.2225 |
| 31018 | E10 | 13110 | 55601  | DDX60     | 0.0873 | 1.2226 |
| 11047 | G11 | 2661  | 129531 | MITD1     | 0.0873 | 1.2227 |
| 51023 | H04 | 55894 | 64783  | RBM15     | 0.0873 | 1.2228 |
| 51023 | D06 | 56268 | 54538  | ROBO4     | 0.0874 | 1.2228 |
| 51022 | G01 | 55729 | 3034   | HAL       | 0.0874 | 1.2229 |
| 11064 | C08 | 1673  | 84929  | FIBCD1    | 0.0874 | 1.2230 |
| 11019 | C02 | 3753  | 79078  | C1orf50   | 0.0875 | 1.2231 |
| 31045 | A02 | 1782  | 56852  | RAD18     | 0.0875 | 1.2231 |
| 51023 | G04 | 56699 | 7375   | USP4      | 0.0875 | 1.2231 |
| 11015 | F11 | 8968  | 4771   | NF2       | 0.0875 | 1.2232 |
| 11044 | D02 | 4362  | 84270  | C9orf89   | 0.0876 | 1.2234 |
| 51026 | A07 | 55871 | 136051 | ZNF786    | 0.0876 | 1.2234 |
| 11086 | A02 | 1500  | 79906  | MORN1     | 0.0876 | 1.2235 |
| 51016 | C09 | 56700 | 728461 | CSAG2     | 0.0876 | 1.2236 |
| 11057 | D05 | 1899  | 85315  | PAQR8     | 0.0876 | 1.2236 |
| 31013 | A11 | 11856 | 63939  | C20orf177 | 0.0876 | 1.2236 |
| 51030 | A01 | 56757 | NA     | NA        | 0.0876 | 1.2236 |
| 51026 | E07 | 56868 | 8618   | CADPS     | 0.0877 | 1.2237 |
| 11014 | C07 | 6498  | 81887  | LAS1L     | 0.0877 | 1.2238 |
| 11027 | C08 | 9784  | 441024 | MTHFD2L   | 0.0877 | 1.2239 |
| 11067 | D02 | 7320  | 410    | ARSA      | 0.0878 | 1.2240 |
| 11069 | D02 | 10238 | 57706  | DENND1A   | 0.0878 | 1.2241 |
| 51009 | F07 | 54114 | 114659 | LRR37B    | 0.0878 | 1.2241 |
| 11034 | A06 | 4684  | 2130   | EWSR1     | 0.0879 | 1.2243 |
| 11046 | H04 | 2637  | 3120   | HLA-DQB2  | 0.0879 | 1.2244 |
| 51033 | H11 | 53991 | 83899  | KRTAP9-2  | 0.0879 | 1.2244 |
| 51025 | H01 | 56342 | 55193  | PBRM1     | 0.0880 | 1.2245 |
| 11010 | G09 | 6730  | 10053  | AP1M2     | 0.0880 | 1.2245 |
| 31039 | C07 | 8791  | 54461  | FBXW5     | 0.0880 | 1.2245 |
| 51034 | D10 | 54213 | 259289 | TAS2R43   | 0.0880 | 1.2246 |
| 11050 | D11 | 2688  | 5810   | RAD1      | 0.0880 | 1.2246 |
| 11081 | F02 | 973   | 389903 | CSAG3     | 0.0880 | 1.2246 |
| 11048 | C11 | 4445  | 3604   | TNFRSF9   | 0.0880 | 1.2246 |
| 51028 | G04 | 56398 | 9584   | RBM39     | 0.0881 | 1.2248 |
| 31024 | A06 | 13631 | 28396  | IGHV4-31  | 0.0881 | 1.2248 |
| 11004 | A05 | 8055  | 84645  | C22orf23  | 0.0881 | 1.2249 |
| 11076 | B04 | 4026  | 5546   | PRCC      | 0.0881 | 1.2249 |
| 51035 | F02 | 53922 | 11186  | RASSF1    | 0.0881 | 1.2249 |
| 31008 | B02 | 11361 | 29078  | NDUFAF4   | 0.0881 | 1.2250 |
| 51005 | C08 | 55654 | 129607 | CMPK2     | 0.0881 | 1.2250 |
| 11054 | F06 | 6983  | 5308   | PITX2     | 0.0882 | 1.2252 |

|       |     |       |        |          |        |        |
|-------|-----|-------|--------|----------|--------|--------|
| 11086 | D04 | 4380  | 4109   | MAGEA10  | 0.0882 | 1.2252 |
| 11015 | D02 | 7428  | 10302  | SNAPC5   | 0.0882 | 1.2253 |
| 11035 | F02 | 3402  | 51174  | TUBD1    | 0.0883 | 1.2254 |
| 11011 | F08 | 2770  | 11153  | FICD     | 0.0883 | 1.2254 |
| 11059 | G08 | 6497  | 79888  | LPCAT1   | 0.0883 | 1.2255 |
| 11068 | B01 | 7809  | 55640  | FLVCR2   | 0.0883 | 1.2256 |
| 51027 | D04 | 53214 | 149233 | IL23R    | 0.0884 | 1.2256 |
| 11046 | G09 | 2088  | 9227   | LRAT     | 0.0884 | 1.2256 |
| 51034 | D08 | 53713 | 29035  | C16orf72 | 0.0884 | 1.2257 |
| 11053 | D10 | 7347  | 64773  | FAM113A  | 0.0884 | 1.2257 |
| 51023 | F12 | 54034 | 22872  | SEC31A   | 0.0884 | 1.2257 |
| 31008 | F03 | 11745 | 83719  | YPEL3    | 0.0885 | 1.2260 |
| 11018 | B05 | 3740  | 638    | BIK      | 0.0885 | 1.2260 |
| 11017 | G09 | 7552  | 58505  | OSTC     | 0.0885 | 1.2262 |
| 11048 | C01 | 3927  | 79447  | C16orf53 | 0.0886 | 1.2263 |
| 11069 | A03 | 8487  | 1102   | RCBTB2   | 0.0886 | 1.2264 |
| 51009 | D04 | 53050 | 170689 | ADAMTS15 | 0.0886 | 1.2264 |
| 31020 | A11 | 13115 | 350    | APOH     | 0.0887 | 1.2265 |
| 11045 | B01 | 2812  | 55816  | DOK5     | 0.0887 | 1.2265 |
| 11047 | D10 | 3023  | 6945   | MLX      | 0.0887 | 1.2266 |
| 11011 | G04 | 1901  | 57515  | SERINC1  | 0.0888 | 1.2269 |
| 51022 | B05 | 55922 | 59344  | ALOXE3   | 0.0889 | 1.2273 |
| 11043 | D04 | 9073  | 38     | ACAT1    | 0.0890 | 1.2273 |
| 51012 | A07 | 53938 | 285267 | ZNF619   | 0.0890 | 1.2273 |
| 11035 | F12 | 821   | 23059  | CLUAP1   | 0.0890 | 1.2273 |
| 11030 | A08 | 3667  | 79178  | THTPA    | 0.0890 | 1.2273 |
| 11052 | B01 | 8799  | 3980   | LIG3     | 0.0890 | 1.2274 |
| 11008 | E01 | 440   | 81890  | QTRT1    | 0.0890 | 1.2276 |
| 11063 | A10 | 8958  | 2194   | FASN     | 0.0891 | 1.2276 |
| 11057 | F11 | 4084  | 10455  | PECI     | 0.0891 | 1.2276 |
| 11054 | C02 | 2229  | 143425 | SYT9     | 0.0891 | 1.2277 |
| 11060 | H01 | 4820  | 9776   | ATG13    | 0.0892 | 1.2279 |
| 11043 | F04 | 5518  | 51506  | UFC1     | 0.0892 | 1.2280 |
| 51028 | H06 | 53378 | 25854  | FAM149A  | 0.0893 | 1.2283 |
| 11066 | C10 | 6428  | 9512   | PMPCB    | 0.0893 | 1.2284 |
| 31004 | F05 | 11016 | 522    | ATP5J    | 0.0894 | 1.2285 |
| 51027 | A07 | 53193 | 9441   | MED26    | 0.0894 | 1.2285 |
| 11039 | B10 | 6793  | 57176  | VAR52    | 0.0894 | 1.2286 |
| 51023 | G07 | 53852 | 152831 | KLB      | 0.0895 | 1.2289 |
| 51018 | A09 | 55775 | 6192   | RPS4Y1   | 0.0895 | 1.2290 |
| 11011 | F06 | 5839  | 7277   | TUBA4A   | 0.0895 | 1.2290 |
| 31032 | G08 | 14785 | 203523 | ZNF449   | 0.0896 | 1.2291 |
| 11024 | F06 | 9682  | 7812   | CSDE1    | 0.0896 | 1.2291 |
| 11073 | E02 | 4589  | 1164   | CKS2     | 0.0896 | 1.2292 |

|       |     |       |        |         |        |        |
|-------|-----|-------|--------|---------|--------|--------|
| 11002 | F06 | 5592  | 2764   | GMFB    | 0.0897 | 1.2293 |
| 51027 | A02 | 55652 | 54845  | ESRP1   | 0.0897 | 1.2293 |
| 31041 | G01 | 7175  | 112464 | PRKCDBP | 0.0897 | 1.2296 |
| 51001 | F05 | 52639 | 5148   | PDE6G   | 0.0898 | 1.2296 |
| 51032 | E11 | 56407 | 399761 | BMS1P5  | 0.0899 | 1.2299 |
| 51022 | C04 | 55918 | 26024  | PTCD1   | 0.0899 | 1.2301 |
| 11067 | C04 | 9922  | 51449  | PCYOX1  | 0.0899 | 1.2301 |
| 31027 | B05 | 14024 | 4314   | MMP3    | 0.0899 | 1.2301 |
| 31034 | B12 | 14926 | 9229   | DLGAP1  | 0.0899 | 1.2301 |
| 11011 | B12 | 7496  | 1937   | EEF1G   | 0.0900 | 1.2302 |
| 11032 | F12 | 9323  | 942    | CD86    | 0.0900 | 1.2304 |
| 31015 | E07 | 12527 | 84522  | JAGN1   | 0.0900 | 1.2304 |
| 11069 | H04 | 6921  | 54552  | GNL3L   | 0.0901 | 1.2304 |
| 11008 | D08 | 2925  | 57447  | NDRG2   | 0.0901 | 1.2305 |
| 31012 | C08 | 12088 | 134145 | FAM173B | 0.0901 | 1.2305 |
| 51027 | A05 | 55653 | 57610  | RANBP10 | 0.0901 | 1.2306 |
| 31020 | G02 | 13295 | 7274   | TTPA    | 0.0901 | 1.2306 |
| 31020 | E10 | 13214 | 4060   | LUM     | 0.0901 | 1.2307 |
| 51034 | H07 | 54482 | 84871  | AGBL4   | 0.0902 | 1.2307 |
| 51033 | B08 | 53551 | 6354   | CCL7    | 0.0902 | 1.2308 |
| 11038 | A05 | 9631  | 79819  | WDR78   | 0.0902 | 1.2308 |
| 11067 | B05 | 6431  | 51068  | NMD3    | 0.0902 | 1.2308 |
| 11055 | E01 | 409   | 113828 | FAM83F  | 0.0902 | 1.2309 |
| 51025 | E12 | 56846 | 9180   | OSMR    | 0.0902 | 1.2310 |
| 11017 | A01 | 5292  | 84967  | LSM10   | 0.0902 | 1.2310 |
| 11011 | A05 | 2894  | 23208  | SYT11   | 0.0903 | 1.2311 |
| 31004 | B07 | 10817 | 54893  | MTMR10  | 0.0903 | 1.2311 |
| 11010 | B04 | 268   | 1491   | CTH     | 0.0903 | 1.2311 |
| 11075 | D02 | 1093  | 64963  | MRPS11  | 0.0903 | 1.2311 |
| 51021 | F03 | 55850 | 148198 | ZNF98   | 0.0903 | 1.2312 |
| 11081 | E10 | 2250  | NA     | NA      | 0.0903 | 1.2312 |
| 11069 | B10 | 4882  | 2053   | EPHX2   | 0.0904 | 1.2313 |
| 11001 | C08 | 2859  | 386759 | MGC9913 | 0.0905 | 1.2317 |
| 11008 | D07 | 7303  | 51451  | LCMT1   | 0.0905 | 1.2318 |
| 31005 | E07 | 11023 | 129138 | ANKRD54 | 0.0906 | 1.2318 |
| 11051 | A04 | 4476  | 1892   | ECHS1   | 0.0906 | 1.2319 |
| 51024 | F03 | 55144 | 2066   | ERBB4   | 0.0906 | 1.2320 |
| 31010 | D08 | 11582 | 6780   | STAU1   | 0.0908 | 1.2327 |
| 11002 | A09 | 8816  | 9946   | CRYZL1  | 0.0909 | 1.2329 |
| 31009 | C02 | 11807 | 50863  | NTM     | 0.0909 | 1.2329 |
| 11069 | D04 | 8519  | 3026   | HABP2   | 0.0910 | 1.2331 |
| 11041 | F05 | 9075  | 4867   | NPHP1   | 0.0910 | 1.2331 |
| 11085 | H05 | 7728  | 4350   | MPG     | 0.0911 | 1.2334 |
| 31023 | G08 | 13753 | 285367 | RPUSD3  | 0.0911 | 1.2334 |



|       |     |       |           |            |        |        |
|-------|-----|-------|-----------|------------|--------|--------|
| 31032 | D06 | 14492 | 23339     | VPS39      | 0.0911 | 1.2335 |
| 11052 | A05 | 4473  | 293       | SLC25A6    | 0.0912 | 1.2336 |
| 11013 | D04 | 5991  | 498       | ATP5A1     | 0.0912 | 1.2337 |
| 11030 | C07 | 3406  | 28992     | MACROD1    | 0.0912 | 1.2338 |
| 11068 | D03 | 7182  | 112885    | PHF21B     | 0.0912 | 1.2338 |
| 11008 | G03 | 3257  | 26073     | POLDIP2    | 0.0912 | 1.2338 |
| 11027 | D07 | 7970  | 100132341 | KIAA0664L3 | 0.0913 | 1.2338 |
| 31028 | D10 | 14148 | 10395     | DLC1       | 0.0913 | 1.2339 |
| 31040 | C04 | 9227  | 92346     | C1orf105   | 0.0913 | 1.2340 |
| 51028 | C07 | 53271 | 6603      | SMARCD2    | 0.0913 | 1.2341 |
| 51032 | D11 | 55546 | 284018    | C17orf58   | 0.0913 | 1.2341 |
| 31015 | G06 | 12587 | 154807    | VKORC1L1   | 0.0914 | 1.2341 |
| 11018 | A05 | 7911  | 4507      | MTAP       | 0.0914 | 1.2341 |
| 11057 | A01 | 2223  | 79740     | ZBBX       | 0.0914 | 1.2343 |
| 31018 | F11 | 13301 | 204010    | RPSAP52    | 0.0915 | 1.2344 |
| 11010 | B02 | 3091  | 79876     | UBA5       | 0.0915 | 1.2345 |
| 51016 | F12 | 55747 | 8343      | HIST1H2BF  | 0.0916 | 1.2347 |
| 11079 | F11 | 1554  | 23424     | TDRD7      | 0.0917 | 1.2350 |
| 11010 | E03 | 619   | 55860     | ACTR10     | 0.0917 | 1.2350 |
| 51016 | A06 | 56429 | 440356    | LOC440356  | 0.0917 | 1.2351 |
| 51034 | G03 | 53777 | 8822      | FGF17      | 0.0918 | 1.2352 |
| 51016 | C06 | 55970 | 118430    | MUCL1      | 0.0918 | 1.2353 |
| 11088 | C11 | 518   | 55181     | C17orf71   | 0.0918 | 1.2354 |
| 11032 | B11 | 6552  | 4107      | MAGEA8     | 0.0918 | 1.2354 |
| 11057 | D09 | 4993  | 84816     | RTN4IP1    | 0.0918 | 1.2355 |
| 11045 | C12 | 9874  | 1805      | DPT        | 0.0918 | 1.2355 |
| 11044 | B10 | 2853  | 90390     | MED30      | 0.0919 | 1.2356 |
| 11042 | A03 | 5481  | 6291      | SAA4       | 0.0919 | 1.2357 |
| 31002 | D12 | 10706 | 5562      | PRKAA1     | 0.0920 | 1.2358 |
| 11011 | D12 | 6055  | 10382     | TUBB4      | 0.0920 | 1.2359 |
| 11077 | C08 | 3746  | 23177     | CEP68      | 0.0921 | 1.2362 |
| 11014 | B08 | 3142  | 7064      | THOP1      | 0.0922 | 1.2365 |
| 11039 | G02 | 1319  | 5583      | PRKCH      | 0.0922 | 1.2365 |
| 51013 | B01 | 53008 | 908       | CCT6A      | 0.0922 | 1.2366 |
| 11035 | E08 | 1538  | 10678     | B3GNT2     | 0.0922 | 1.2367 |
| 31026 | D04 | 13789 | 5047      | PAEP       | 0.0923 | 1.2367 |
| 31005 | H06 | 10911 | 54898     | ELOVL2     | 0.0923 | 1.2368 |
| 11011 | D09 | 6855  | 6871      | TADA2A     | 0.0924 | 1.2370 |
| 51033 | C07 | 53693 | 152225    | LOC152225  | 0.0924 | 1.2370 |
| 31028 | F09 | 14087 | 431707    | LHX8       | 0.0924 | 1.2372 |
| 11018 | B02 | 6297  | 55284     | UBE2W      | 0.0925 | 1.2373 |
| 11063 | G04 | 4408  | 79171     | RBM42      | 0.0925 | 1.2375 |
| 11048 | B02 | 2254  | 144321    | GLIPR1L2   | 0.0926 | 1.2376 |
| 11014 | E08 | 4906  | 51433     | ANAPC5     | 0.0926 | 1.2378 |

|       |     |       |        |           |        |        |
|-------|-----|-------|--------|-----------|--------|--------|
| 11065 | F04 | 7638  | 3500   | IGHG1     | 0.0927 | 1.2380 |
| 51008 | B05 | 53714 | 64328  | XPO4      | 0.0928 | 1.2383 |
| 31044 | A05 | 3616  | 10609  | SC65      | 0.0928 | 1.2383 |
| 31015 | A12 | 12444 | 159090 | FAM122B   | 0.0928 | 1.2383 |
| 51010 | C01 | 54339 | 7581   | ZNF33A    | 0.0928 | 1.2383 |
| 11044 | F01 | 6591  | 92806  | CENPBD1   | 0.0928 | 1.2383 |
| 11067 | A05 | 1747  | 202500 | TCTE1     | 0.0929 | 1.2384 |
| 31018 | G03 | 13003 | 117157 | SH2D1B    | 0.0929 | 1.2384 |
| 11085 | F12 | 852   | 54765  | TRIM44    | 0.0930 | 1.2387 |
| 31021 | H07 | 13257 | 55843  | ARHGAP15  | 0.0930 | 1.2388 |
| 11041 | C06 | 5789  | 9167   | COX7A2L   | 0.0930 | 1.2388 |
| 51003 | H02 | 54130 | 1421   | CRYGD     | 0.0930 | 1.2388 |
| 11029 | A11 | 3295  | 5690   | PSMB2     | 0.0931 | 1.2389 |
| 11055 | B05 | 7755  | 1891   | ECH1      | 0.0931 | 1.2391 |
| 51025 | H02 | 53283 | 80036  | TRPM3     | 0.0931 | 1.2392 |
| 31023 | C08 | 13468 | 112937 | GLB1L3    | 0.0932 | 1.2395 |
| 51014 | C06 | 52762 | 285848 | PNPLA1    | 0.0933 | 1.2397 |
| 31030 | C01 | 14339 | 23435  | TARDBP    | 0.0933 | 1.2397 |
| 51008 | E09 | 56873 | 2074   | ERCC6     | 0.0933 | 1.2398 |
| 51032 | A10 | 55501 | 83699  | SH3BGRL2  | 0.0934 | 1.2398 |
| 51033 | D04 | 55258 | NA     | NA        | 0.0934 | 1.2399 |
| 11056 | C09 | 2216  | 169166 | SNX31     | 0.0934 | 1.2399 |
| 11014 | A07 | 8777  | 63892  | THADA     | 0.0935 | 1.2402 |
| 31003 | C10 | 10729 | 81627  | C1orf25   | 0.0935 | 1.2402 |
| 11030 | G02 | 9835  | 10804  | GJB6      | 0.0936 | 1.2404 |
| 11029 | A01 | 706   | 56521  | DNAJC12   | 0.0936 | 1.2405 |
| 31015 | C08 | 12727 | 10959  | TMED2     | 0.0936 | 1.2406 |
| 11076 | A09 | 1873  | 6505   | SLC1A1    | 0.0937 | 1.2407 |
| 31014 | B02 | 11838 | 162972 | ZNF550    | 0.0937 | 1.2407 |
| 11019 | B06 | 7081  | 29946  | SERTAD3   | 0.0937 | 1.2407 |
| 11035 | B07 | 8346  | 5890   | RAD51L1   | 0.0937 | 1.2409 |
| 11048 | E09 | 6468  | 85465  | EPT1      | 0.0937 | 1.2409 |
| 11050 | F11 | 4099  | 7139   | TNNT2     | 0.0938 | 1.2410 |
| 31037 | H04 | 13118 | 11340  | EXOSC8    | 0.0938 | 1.2410 |
| 11034 | H11 | 6397  | 8634   | RTCD1     | 0.0938 | 1.2411 |
| 11028 | A06 | 3014  | 112487 | C14orf126 | 0.0938 | 1.2411 |
| 11085 | A02 | 2857  | 682    | BSG       | 0.0939 | 1.2414 |
| 11057 | H03 | 4588  | 79770  | TXNDC15   | 0.0939 | 1.2414 |
| 31004 | F09 | 10974 | 6009   | RHEB      | 0.0940 | 1.2417 |
| 11034 | C09 | 1391  | 128153 | SPATA17   | 0.0940 | 1.2417 |
| 11050 | G01 | 4991  | 25799  | ZNF324    | 0.0941 | 1.2419 |
| 11019 | B05 | 6426  | 4634   | MYL3      | 0.0941 | 1.2419 |
| 31044 | C04 | 9187  | 51111  | SUV420H1  | 0.0941 | 1.2419 |
| 11019 | H05 | 7982  | 3251   | HPRT1     | 0.0941 | 1.2420 |

|       |     |       |        |           |        |        |
|-------|-----|-------|--------|-----------|--------|--------|
| 11024 | D05 | 10191 | 90134  | KCNH7     | 0.0941 | 1.2420 |
| 11011 | H07 | 6185  | 29760  | BLNK      | 0.0942 | 1.2421 |
| 51033 | F12 | 54588 | 80742  | PRR3      | 0.0942 | 1.2421 |
| 51032 | H05 | 56452 | 344901 | OSTN      | 0.0942 | 1.2422 |
| 31023 | C10 | 13374 | 285367 | RPUSD3    | 0.0942 | 1.2423 |
| 51016 | A12 | 55981 | 151009 | LOC151009 | 0.0942 | 1.2423 |
| 51009 | B12 | 55118 | 56107  | PCDHGA9   | 0.0942 | 1.2424 |
| 11067 | B09 | 10174 | 53834  | FGFRL1    | 0.0943 | 1.2426 |
| 11047 | B07 | 4961  | 6450   | SH3BGR    | 0.0944 | 1.2427 |
| 11061 | C02 | 990   | 135    | ADORA2A   | 0.0944 | 1.2427 |
| 31017 | A07 | 12547 | 117246 | FTSJ3     | 0.0944 | 1.2427 |
| 51027 | F10 | 53232 | 51434  | ANAPC7    | 0.0944 | 1.2429 |
| 11041 | B01 | 1907  | 400120 | C13orf36  | 0.0944 | 1.2429 |
| 51026 | B04 | 55525 | 5145   | PDE6A     | 0.0945 | 1.2430 |
| 31007 | E11 | 11524 | 22808  | MRAS      | 0.0945 | 1.2430 |
| 31003 | C01 | 10499 | 257019 | FRMD3     | 0.0945 | 1.2430 |
| 31015 | H09 | 12577 | 54994  | C20orf11  | 0.0945 | 1.2431 |
| 51002 | B12 | 52753 | 84536  | C21orf67  | 0.0945 | 1.2431 |
| 11035 | C06 | 9262  | 55236  | UBA6      | 0.0946 | 1.2434 |
| 11014 | B01 | 2931  | 23265  | EXOC7     | 0.0947 | 1.2437 |
| 11047 | H09 | 7048  | 326625 | MMAB      | 0.0947 | 1.2438 |
| 11040 | D03 | 8982  | 7551   | ZNF3      | 0.0947 | 1.2438 |
| 11010 | B05 | 6822  | 5937   | RBMS1     | 0.0948 | 1.2439 |
| 11025 | G05 | 1938  | 868    | CBLB      | 0.0948 | 1.2440 |
| 11044 | D06 | 493   | 2495   | FTH1      | 0.0949 | 1.2442 |
| 11032 | B12 | 7015  | 29071  | C1GALT1C1 | 0.0949 | 1.2443 |
| 11014 | F12 | 1027  | 4753   | NELL2     | 0.0950 | 1.2444 |
| 31026 | G02 | 13798 | 4975   | OMP       | 0.0950 | 1.2446 |
| 51021 | E09 | 56156 | 80311  | KLHL15    | 0.0950 | 1.2446 |
| 11039 | D09 | 7343  | 11054  | OGFR      | 0.0951 | 1.2448 |
| 31003 | C06 | 10353 | 170062 | FAM47B    | 0.0951 | 1.2449 |
| 11059 | D09 | 1349  | 204219 | LASS3     | 0.0952 | 1.2451 |
| 11066 | B08 | 7085  | 79663  | HSPBAP1   | 0.0952 | 1.2451 |
| 11011 | G10 | 5866  | 10227  | MFSD10    | 0.0952 | 1.2451 |
| 11020 | A06 | 7329  | 220164 | DOK6      | 0.0952 | 1.2452 |
| 51004 | H03 | 52628 | 112399 | EGLN3     | 0.0952 | 1.2452 |
| 11052 | D02 | 1736  | 147463 | ANKRD29   | 0.0953 | 1.2453 |
| 31023 | G09 | 13654 | 302    | ANXA2     | 0.0954 | 1.2456 |
| 11042 | D07 | 8463  | 151647 | FAM19A4   | 0.0954 | 1.2456 |
| 11011 | D10 | 3583  | 1352   | COX10     | 0.0954 | 1.2457 |
| 31004 | D09 | 11032 | 2495   | FTH1      | 0.0955 | 1.2461 |
| 11043 | D01 | 1504  | 159162 | RBMV2FP   | 0.0956 | 1.2461 |
| 11034 | G04 | 6366  | 51438  | MAGEC2    | 0.0956 | 1.2462 |
| 11038 | D07 | 4911  | 25839  | COG4      | 0.0957 | 1.2464 |

|       |     |       |        |          |        |        |
|-------|-----|-------|--------|----------|--------|--------|
| 51014 | A12 | 52733 | 84618  | NT5C1A   | 0.0957 | 1.2466 |
| 31003 | B11 | 10641 | 23341  | DNAJC16  | 0.0958 | 1.2467 |
| 11011 | E11 | 431   | 129868 | TRIM43   | 0.0958 | 1.2467 |
| 51035 | F04 | 53980 | 2830   | GPR6     | 0.0958 | 1.2467 |
| 31030 | H02 | 14354 | 29068  | ZBTB44   | 0.0958 | 1.2467 |
| 11011 | B02 | 3994  | 50859  | SPOCK3   | 0.0959 | 1.2471 |
| 11060 | G03 | 8506  | 11318  | GPR182   | 0.0959 | 1.2471 |
| 11019 | A06 | 7537  | 64769  | MEAF6    | 0.0959 | 1.2472 |
| 11064 | C07 | 7676  | 2674   | GFRA1    | 0.0960 | 1.2474 |
| 51001 | A05 | 53171 | 389125 | MUSTN1   | 0.0960 | 1.2474 |
| 51018 | B11 | 56410 | 389799 | C9orf171 | 0.0960 | 1.2474 |
| 11004 | C01 | 5753  | 55974  | RAG1AP1  | 0.0961 | 1.2476 |
| 11044 | A02 | 501   | 9939   | RBM8A    | 0.0961 | 1.2476 |
| 11025 | H06 | 2449  | 23550  | PSD4     | 0.0961 | 1.2476 |
| 11081 | C07 | 3884  | NA     | NA       | 0.0961 | 1.2477 |
| 31021 | A09 | 13024 | 9314   | KLF4     | 0.0961 | 1.2477 |
| 31024 | H02 | 13661 | 64225  | ATL2     | 0.0961 | 1.2477 |
| 11079 | C08 | 8450  | 58484  | NLRC4    | 0.0961 | 1.2478 |
| 31008 | E01 | 11378 | 389123 | IQCF2    | 0.0962 | 1.2479 |
| 11057 | B02 | 2348  | 5567   | PRKACB   | 0.0963 | 1.2482 |
| 51018 | A12 | 53335 | 7627   | ZNF75A   | 0.0963 | 1.2483 |
| 51028 | B12 | 56819 | 283768 | GOLGA8G  | 0.0963 | 1.2483 |
| 11065 | B05 | 6637  | 56342  | PPAN     | 0.0963 | 1.2483 |
| 11003 | C07 | 9929  | 901    | CCNG2    | 0.0964 | 1.2486 |
| 11006 | C07 | 9633  | 283518 | KCNRG    | 0.0965 | 1.2487 |
| 11002 | F08 | 9896  | 114900 | C1QTNF4  | 0.0965 | 1.2487 |
| 11034 | C07 | 882   | NA     | NA       | 0.0965 | 1.2489 |
| 11021 | C02 | 5180  | 26207  | PITPNC1  | 0.0966 | 1.2490 |
| 31026 | E08 | 13964 | 10321  | CRISP3   | 0.0966 | 1.2490 |
| 51021 | A10 | 55731 | 94120  | SYTL3    | 0.0966 | 1.2490 |
| 11032 | G07 | 1954  | 124817 | CNTD1    | 0.0966 | 1.2491 |
| 11011 | C02 | 3183  | 1937   | EEF1G    | 0.0966 | 1.2492 |
| 11044 | A03 | 637   | 7485   | WRB      | 0.0966 | 1.2493 |
| 51013 | H07 | 52808 | 386724 | AMIGO3   | 0.0967 | 1.2493 |
| 11016 | B07 | 9090  | 8828   | NRP2     | 0.0967 | 1.2493 |
| 11051 | A01 | 4867  | 1749   | DLX5     | 0.0968 | 1.2498 |
| 11062 | C10 | 1167  | 3671   | ISLR     | 0.0969 | 1.2498 |
| 11054 | B11 | 1580  | 4113   | MAGEB2   | 0.0969 | 1.2499 |
| 11061 | F05 | 10228 | 2694   | GIF      | 0.0969 | 1.2500 |
| 51022 | H03 | 55849 | 2492   | FSHR     | 0.0969 | 1.2501 |
| 11052 | C05 | 4416  | 79172  | CENPO    | 0.0970 | 1.2503 |
| 31006 | D11 | 11183 | 57822  | GRHL3    | 0.0971 | 1.2504 |
| 31016 | C03 | 12513 | 9801   | MRPL19   | 0.0971 | 1.2505 |
| 11048 | F09 | 7193  | 939    | CD27     | 0.0971 | 1.2506 |

|       |     |       |        |          |        |        |
|-------|-----|-------|--------|----------|--------|--------|
| 31012 | B01 | 12279 | 27254  | CSDC2    | 0.0971 | 1.2506 |
| 11027 | G08 | 4015  | 10912  | GADD45G  | 0.0971 | 1.2506 |
| 31044 | B11 | 428   | 6137   | RPL13    | 0.0971 | 1.2506 |
| 11057 | H09 | 979   | 3106   | HLA-B    | 0.0972 | 1.2509 |
| 11086 | F12 | 6966  | 9908   | G3BP2    | 0.0973 | 1.2512 |
| 11076 | B03 | 3943  | 55308  | DDX19A   | 0.0973 | 1.2512 |
| 51032 | H09 | 56904 | 92196  | DAPL1    | 0.0974 | 1.2515 |
| 11035 | G03 | 6779  | 26135  | SERBP1   | 0.0974 | 1.2515 |
| 11006 | E08 | 3194  | 1316   | KLF6     | 0.0975 | 1.2516 |
| 11032 | C01 | 10012 | 58485  | TRAPPC1  | 0.0975 | 1.2518 |
| 11067 | G01 | 6573  | 84188  | FAR1     | 0.0975 | 1.2518 |
| 11044 | H08 | 890   | 3005   | H1F0     | 0.0976 | 1.2520 |
| 51021 | F06 | 55851 | 1584   | CYP11B1  | 0.0976 | 1.2520 |
| 11046 | E08 | 5052  | 25974  | MMACHC   | 0.0977 | 1.2523 |
| 11060 | H10 | 105   | 25829  | TMEM184B | 0.0978 | 1.2525 |
| 11047 | G01 | 7396  | 85365  | ALG2     | 0.0978 | 1.2526 |
| 11054 | B12 | 1706  | 83894  | TTC29    | 0.0978 | 1.2526 |
| 11079 | B10 | 2669  | 7414   | VCL      | 0.0979 | 1.2528 |
| 11076 | F10 | 1560  | 113835 | ZNF257   | 0.0979 | 1.2528 |
| 11049 | C03 | 2030  | 362    | AQP5     | 0.0980 | 1.2531 |
| 11043 | H05 | 6     | 7178   | TPT1     | 0.0980 | 1.2531 |
| 11060 | A07 | 4438  | 79364  | ZXDC     | 0.0980 | 1.2532 |
| 11051 | C09 | 612   | 112869 | CCDC101  | 0.0980 | 1.2532 |
| 51034 | G05 | 54071 | 90316  | TGIF2LX  | 0.0981 | 1.2533 |
| 51029 | F05 | 55481 | 4063   | LY9      | 0.0982 | 1.2536 |
| 31040 | F12 | 8997  | 3298   | HSF2     | 0.0982 | 1.2536 |
| 11014 | B06 | 154   | 3104   | ZBTB48   | 0.0982 | 1.2538 |
| 11065 | E02 | 1031  | 23729  | SHPK     | 0.0983 | 1.2539 |
| 11067 | A06 | 2988  | 10946  | SF3A3    | 0.0983 | 1.2539 |
| 11063 | B01 | 1814  | 10130  | PDIA6    | 0.0984 | 1.2542 |
| 51008 | H07 | 55167 | 9758   | FRMPD4   | 0.0984 | 1.2542 |
| 11086 | A01 | 5480  | 51562  | MBIP     | 0.0984 | 1.2543 |
| 11026 | C06 | 9212  | 63947  | DMRTC1   | 0.0984 | 1.2543 |
| 51022 | E12 | 56421 | 85369  | FAM40A   | 0.0985 | 1.2546 |
| 31002 | A12 | 10608 | 80829  | ZFP91    | 0.0986 | 1.2548 |
| 11014 | E09 | 3024  | 84171  | LOXL4    | 0.0986 | 1.2549 |
| 51004 | B10 | 55065 | 81341  | OR10W1   | 0.0986 | 1.2550 |
| 51021 | C02 | 56793 | 5081   | PAX7     | 0.0987 | 1.2550 |
| 11068 | B10 | 9580  | 23432  | GPR161   | 0.0987 | 1.2551 |
| 11081 | C09 | 8996  | 5319   | PLA2G1B  | 0.0987 | 1.2551 |
| 51012 | F11 | 53653 | 81031  | SLC2A10  | 0.0987 | 1.2552 |
| 51014 | H06 | 52914 | 431705 | ASTL     | 0.0987 | 1.2552 |
| 11011 | C12 | 423   | 3931   | LCAT     | 0.0987 | 1.2552 |
| 11058 | D06 | 1135  | 133022 | TRAM1L1  | 0.0988 | 1.2555 |

|       |     |       |        |          |        |        |
|-------|-----|-------|--------|----------|--------|--------|
| 11011 | A07 | 3026  | 113235 | SLC46A1  | 0.0989 | 1.2556 |
| 11034 | H08 | 8688  | 8863   | PER3     | 0.0989 | 1.2556 |
| 51026 | F08 | 56852 | 57157  | PHTF2    | 0.0989 | 1.2557 |
| 51021 | A06 | 55874 | 144402 | CPNE8    | 0.0989 | 1.2557 |
| 11069 | C03 | 8111  | 3454   | IFNAR1   | 0.0989 | 1.2557 |
| 31020 | D07 | 13131 | 2959   | GTF2B    | 0.0989 | 1.2558 |
| 11010 | A09 | 396   | 6122   | RPL3     | 0.0989 | 1.2558 |
| 11052 | E03 | 4147  | 9249   | DHRS3    | 0.0990 | 1.2560 |
| 11011 | C06 | 3177  | 1201   | CLN3     | 0.0990 | 1.2561 |
| 51002 | E11 | 54924 | 79008  | GIYD2    | 0.0991 | 1.2564 |
| 11010 | D02 | 3168  | 2805   | GOT1     | 0.0992 | 1.2565 |
| 11011 | D03 | 7513  | 5700   | PSMC1    | 0.0992 | 1.2566 |
| 51021 | A12 | 56812 | 23034  | SAMD4A   | 0.0992 | 1.2566 |
| 11007 | D01 | 3083  | 27292  | DIMT1L   | 0.0992 | 1.2567 |
| 31008 | G08 | 11636 | 7802   | DNALI1   | 0.0993 | 1.2570 |
| 11073 | G08 | 1109  | 153768 | PRELID2  | 0.0994 | 1.2572 |
| 11026 | A09 | 8424  | NA     | NA       | 0.0995 | 1.2574 |
| 31034 | C02 | 14899 | 140881 | DEFB129  | 0.0996 | 1.2579 |
| 31020 | D06 | 13152 | 80231  | CXorf21  | 0.0997 | 1.2581 |
| 11055 | A11 | 367   | 112479 | ERI2     | 0.0997 | 1.2581 |
| 11050 | D01 | 8555  | 57510  | XPO5     | 0.0997 | 1.2582 |
| 11063 | H01 | 4912  | 84675  | TRIM55   | 0.0998 | 1.2583 |
| 11066 | A06 | 1549  | 7718   | ZNF165   | 0.0998 | 1.2584 |
| 31030 | G05 | 14207 | 90957  | DHX57    | 0.0998 | 1.2584 |
| 11051 | D04 | 4310  | 84767  | SPRYD5   | 0.0998 | 1.2584 |
| 31039 | H05 | 8814  | 57162  | PELI1    | 0.0998 | 1.2585 |
| 11026 | F02 | 8580  | 80267  | EDEM3    | 0.0999 | 1.2585 |
| 11067 | A08 | 1414  | 26206  | SPAG8    | 0.0999 | 1.2586 |
| 51012 | C07 | 53844 | 124872 | B4GALNT2 | 0.0999 | 1.2586 |
| 51004 | G01 | 53902 | 80739  | C6orf25  | 0.1000 | 1.2588 |
| 51002 | D12 | 54676 | 644591 | PPIAL4G  | 0.1000 | 1.2590 |
| 11002 | D08 | 9859  | 93377  | OPALIN   | 0.1000 | 1.2590 |
| 11062 | A12 | 578   | 30     | ACAA1    | 0.1001 | 1.2592 |
| 31025 | B05 | 13566 | 23268  | DNMBP    | 0.1001 | 1.2593 |
| 11064 | C06 | 7277  | 64116  | SLC39A8  | 0.1002 | 1.2594 |
| 31030 | F04 | 14444 | 51422  | PRKAG2   | 0.1003 | 1.2597 |
| 51001 | H11 | 54669 | 220979 | C10orf25 | 0.1003 | 1.2598 |
| 11050 | D06 | 5609  | 25936  | NSL1     | 0.1004 | 1.2601 |
| 11048 | H04 | 111   | 5372   | PMM1     | 0.1004 | 1.2602 |
| 51025 | H04 | 55704 | 55914  | ERBB2IP  | 0.1005 | 1.2604 |
| 11063 | D10 | 8256  | 8760   | CDS2     | 0.1005 | 1.2604 |
| 11050 | C01 | 4138  | 79156  | PLEKHF1  | 0.1005 | 1.2605 |
| 51023 | A05 | 56088 | 9829   | DNAJC6   | 0.1006 | 1.2606 |
| 31022 | H09 | 13389 | 90416  | C15orf57 | 0.1007 | 1.2608 |

|       |     |       |        |           |        |        |
|-------|-----|-------|--------|-----------|--------|--------|
| 31006 | D10 | 11310 | 124454 | EARS2     | 0.1007 | 1.2608 |
| 11052 | F09 | 2709  | 1398   | CRK       | 0.1007 | 1.2609 |
| 11034 | C11 | 3439  | 84614  | ZBTB37    | 0.1008 | 1.2611 |
| 11067 | A12 | 9130  | 22907  | DHX30     | 0.1008 | 1.2613 |
| 31001 | C03 | 10476 | 23627  | PRND      | 0.1010 | 1.2617 |
| 11066 | A03 | 6622  | 11232  | POLG2     | 0.1010 | 1.2617 |
| 11062 | A03 | 9241  | 130540 | ALS2CR12  | 0.1010 | 1.2618 |
| 11062 | B10 | 5027  | 10053  | AP1M2     | 0.1011 | 1.2620 |
| 11015 | A11 | 8983  | 85002  | FAM86B1   | 0.1011 | 1.2620 |
| 11056 | B06 | 132   | 302    | ANXA2     | 0.1011 | 1.2621 |
| 51034 | D01 | 53806 | 3441   | IFNA4     | 0.1012 | 1.2625 |
| 31045 | B02 | 3077  | 10616  | RBCK1     | 0.1012 | 1.2625 |
| 11049 | D12 | 5579  | 64105  | CENPK     | 0.1013 | 1.2627 |
| 11057 | G09 | 632   | 81929  | SEH1L     | 0.1013 | 1.2627 |
| 11045 | G04 | 2515  | 26291  | FGF21     | 0.1013 | 1.2627 |
| 51012 | G10 | 52717 | 728929 | TCEB3CL   | 0.1013 | 1.2627 |
| 11058 | G06 | 8917  | 9780   | FAM38A    | 0.1014 | 1.2629 |
| 31025 | C07 | 13586 | 64780  | MICAL1    | 0.1014 | 1.2629 |
| 11067 | F07 | 2442  | 3615   | IMPDH2    | 0.1014 | 1.2629 |
| 31019 | D12 | 13149 | 54967  | CXorf48   | 0.1014 | 1.2629 |
| 31028 | E12 | 14270 | 472    | ATM       | 0.1014 | 1.2630 |
| 11041 | G08 | 2777  | 114932 | MRFAP1L1  | 0.1015 | 1.2633 |
| 11018 | F02 | 6192  | 685    | BTC       | 0.1016 | 1.2637 |
| 31013 | E09 | 11844 | 23313  | C22orf9   | 0.1017 | 1.2637 |
| 11013 | A03 | 4597  | 63929  | XPNPEP3   | 0.1017 | 1.2638 |
| 31005 | E05 | 10996 | 29777  | ABT1      | 0.1017 | 1.2639 |
| 11061 | G11 | 5657  | 1357   | CPA1      | 0.1017 | 1.2639 |
| 51028 | F02 | 56635 | 54658  | UGT1A1    | 0.1017 | 1.2639 |
| 11055 | D10 | 7449  | 26995  | TRUB2     | 0.1018 | 1.2640 |
| 11087 | D04 | 1825  | 79070  | KDELC1    | 0.1019 | 1.2643 |
| 11053 | B12 | 7419  | 139596 | UPRT      | 0.1019 | 1.2644 |
| 31045 | A07 | 9636  | 80183  | C13orf18  | 0.1020 | 1.2648 |
| 11020 | F08 | 7591  | 93487  | MAPK11P1L | 0.1020 | 1.2649 |
| 51031 | F10 | 56477 | 345611 | IRGM      | 0.1021 | 1.2650 |
| 11084 | F05 | 1172  | 408263 | C5orf40   | 0.1021 | 1.2650 |
| 11039 | E05 | 5886  | 2000   | ELF4      | 0.1021 | 1.2651 |
| 31008 | A05 | 11443 | 147372 | CCBE1     | 0.1021 | 1.2651 |
| 51024 | C05 | 53569 | 7403   | KDM6A     | 0.1021 | 1.2652 |
| 11073 | A09 | 4088  | 90410  | IFT20     | 0.1022 | 1.2653 |
| 31033 | A08 | 14877 | 78996  | C7orf49   | 0.1022 | 1.2655 |
| 11019 | A09 | 7342  | 581    | BAX       | 0.1023 | 1.2655 |
| 11055 | H08 | 511   | 51375  | SNX7      | 0.1024 | 1.2658 |
| 11081 | E07 | 6492  | 201254 | STRA13    | 0.1024 | 1.2659 |
| 31044 | F06 | 4712  | 29803  | REPIN1    | 0.1025 | 1.2661 |

|       |     |       |        |           |        |        |
|-------|-----|-------|--------|-----------|--------|--------|
| 11068 | D01 | 1241  | 123016 | TTC8      | 0.1026 | 1.2664 |
| 11014 | E04 | 750   | 23246  | BOP1      | 0.1026 | 1.2665 |
| 51005 | E03 | 54077 | 374470 | C12orf42  | 0.1027 | 1.2667 |
| 51022 | A04 | 55869 | 8227   | SFRS17A   | 0.1027 | 1.2668 |
| 31032 | G01 | 14592 | 4322   | MMP13     | 0.1027 | 1.2668 |
| 11038 | A01 | 5913  | 79012  | CAMKV     | 0.1027 | 1.2669 |
| 11065 | E10 | 5803  | 3434   | IFIT1     | 0.1028 | 1.2669 |
| 51034 | G07 | 54686 | 5545   | PRB4      | 0.1029 | 1.2672 |
| 11035 | B08 | 9788  | 9649   | RALGPS1   | 0.1029 | 1.2673 |
| 11068 | G11 | 7101  | 387032 | ZKSCAN4   | 0.1029 | 1.2673 |
| 11005 | B01 | 2588  | 9094   | UNC119    | 0.1029 | 1.2674 |
| 11008 | B09 | 5626  | 11055  | ZPBP      | 0.1030 | 1.2676 |
| 31024 | C01 | 13581 | 3805   | KIR2DL4   | 0.1030 | 1.2676 |
| 11088 | H02 | 10231 | 5068   | REG3A     | 0.1030 | 1.2678 |
| 51032 | B09 | 56829 | 386684 | KRTAP12-4 | 0.1031 | 1.2679 |
| 51022 | G06 | 56174 | 9360   | PPIG      | 0.1032 | 1.2681 |
| 51015 | D12 | 53982 | 284424 | C19orf30  | 0.1032 | 1.2681 |
| 11019 | C07 | 7371  | 494150 | LOC494150 | 0.1032 | 1.2682 |
| 11068 | A08 | 9898  | 56301  | SLC7A10   | 0.1032 | 1.2682 |
| 51024 | E07 | 56296 | 8736   | MYOM1     | 0.1032 | 1.2682 |
| 11032 | A10 | 9482  | 10476  | ATP5H     | 0.1032 | 1.2683 |
| 31042 | G01 | 4843  | 84804  | MFSD9     | 0.1032 | 1.2683 |
| 31007 | H11 | 11398 | 64975  | MRPL41    | 0.1032 | 1.2683 |
| 51005 | E01 | 54050 | 3077   | HFE       | 0.1033 | 1.2684 |
| 51029 | A05 | 56040 | 222553 | SLC35F1   | 0.1033 | 1.2685 |
| 51034 | C09 | 55035 | NA     | NA        | 0.1033 | 1.2686 |
| 11008 | B08 | 5430  | 9114   | ATP6V0D1  | 0.1033 | 1.2686 |
| 51004 | E07 | 53786 | 80380  | PDCD1LG2  | 0.1033 | 1.2686 |
| 11034 | A02 | 7964  | 81875  | ISG20L2   | 0.1033 | 1.2686 |
| 31006 | E01 | 10824 | 7474   | WNT5A     | 0.1034 | 1.2687 |
| 51032 | H01 | 56765 | 155006 | TMEM213   | 0.1034 | 1.2688 |
| 11021 | H10 | 7127  | 9454   | HOMER3    | 0.1034 | 1.2688 |
| 51018 | A03 | 55777 | 11015  | KDELR3    | 0.1034 | 1.2689 |
| 11018 | F05 | 7664  | 23478  | SEC11A    | 0.1034 | 1.2689 |
| 11024 | B11 | 4641  | 84859  | LRCH3     | 0.1035 | 1.2690 |
| 11047 | A11 | 4291  | 6122   | RPL3      | 0.1035 | 1.2691 |
| 31011 | D06 | 12033 | 60489  | APOBEC3G  | 0.1035 | 1.2691 |
| 51027 | C12 | 55224 | 8664   | EIF3D     | 0.1035 | 1.2691 |
| 11063 | C03 | 6914  | 55902  | ACSS2     | 0.1035 | 1.2692 |
| 11079 | D07 | 1182  | 55753  | OGDHL     | 0.1035 | 1.2692 |
| 11049 | F07 | 6645  | 79758  | DHRS12    | 0.1036 | 1.2693 |
| 51025 | G04 | 56879 | 22878  | KIAA1012  | 0.1036 | 1.2694 |
| 11068 | F08 | 10172 | 285761 | DCBLD1    | 0.1036 | 1.2694 |
| 31026 | H09 | 13816 | 9350   | CER1      | 0.1036 | 1.2695 |



|       |     |       |        |          |        |        |
|-------|-----|-------|--------|----------|--------|--------|
| 51016 | G06 | 55983 | 253018 | HCG27    | 0.1036 | 1.2695 |
| 11011 | A04 | 3100  | 5328   | PLAU     | 0.1037 | 1.2696 |
| 11036 | B01 | 6041  | 2222   | FDFT1    | 0.1037 | 1.2698 |
| 11067 | F09 | 6841  | 6301   | SARS     | 0.1037 | 1.2698 |
| 11006 | F07 | 8890  | 11180  | WDR6     | 0.1038 | 1.2698 |
| 11069 | D10 | 4339  | 9517   | SPTLC2   | 0.1038 | 1.2699 |
| 11013 | H07 | 6169  | 57325  | CSRP2BP  | 0.1038 | 1.2700 |
| 11026 | C05 | 3117  | 2958   | GTF2A2   | 0.1038 | 1.2700 |
| 51035 | D05 | 53775 | 4010   | LMX1B    | 0.1038 | 1.2701 |
| 31009 | H01 | 11485 | 23318  | ZCCHC11  | 0.1038 | 1.2701 |
| 31017 | B09 | 12922 | 54830  | NUP62CL  | 0.1039 | 1.2702 |
| 11057 | B06 | 2885  | 11070  | TMEM115  | 0.1039 | 1.2702 |
| 51034 | E09 | 54658 | 284021 | C17orf60 | 0.1039 | 1.2703 |
| 11067 | A03 | 7580  | 18     | ABAT     | 0.1039 | 1.2704 |
| 11060 | H08 | 5590  | 6999   | TDO2     | 0.1039 | 1.2704 |
| 11040 | D01 | 7170  | 54626  | HES2     | 0.1041 | 1.2708 |
| 31014 | F09 | 12347 | 10643  | IGF2BP3  | 0.1041 | 1.2708 |
| 51032 | F03 | 55760 | 64184  | EDDM3B   | 0.1043 | 1.2714 |
| 11065 | B04 | 5078  | 10955  | SERINC3  | 0.1044 | 1.2716 |
| 51022 | E09 | 56666 | 90317  | ZNF616   | 0.1044 | 1.2717 |
| 51034 | F03 | 13840 | 3982   | LIM2     | 0.1044 | 1.2717 |
| 51015 | A11 | 52866 | 1084   | CEACAM3  | 0.1045 | 1.2719 |
| 51023 | A01 | 56339 | 166336 | PRICKLE2 | 0.1046 | 1.2723 |
| 11041 | E08 | 806   | 3429   | IFI27    | 0.1046 | 1.2723 |
| 51032 | A08 | 12276 | 54014  | BRWD1    | 0.1046 | 1.2723 |
| 11085 | H02 | 4090  | 9474   | ATG5     | 0.1046 | 1.2724 |
| 11048 | H09 | 2945  | 6901   | TAZ      | 0.1046 | 1.2725 |
| 11042 | F06 | 8531  | 222234 | FAM185A  | 0.1047 | 1.2725 |
| 31018 | C08 | 13121 | 151903 | CCDC12   | 0.1047 | 1.2726 |
| 11017 | G10 | 7901  | 113419 | TEX261   | 0.1047 | 1.2727 |
| 51014 | A06 | 52930 | 136227 | EMID2    | 0.1048 | 1.2728 |
| 51034 | H04 | 53866 | 605    | BCL7A    | 0.1048 | 1.2729 |
| 11034 | D02 | 1997  | 57007  | CXCR7    | 0.1048 | 1.2729 |
| 11042 | E04 | 8935  | 55778  | ZNF839   | 0.1048 | 1.2730 |
| 51013 | B02 | 54289 | 249    | ALPL     | 0.1049 | 1.2732 |
| 11019 | D12 | 5363  | 83463  | MXD3     | 0.1050 | 1.2734 |
| 11087 | A08 | 2961  | 5528   | PPP2R5D  | 0.1050 | 1.2734 |
| 51010 | F09 | 52907 | 57476  | GRAMD1B  | 0.1051 | 1.2737 |
| 11076 | E10 | 1555  | 340252 | ZNF680   | 0.1052 | 1.2740 |
| 11032 | G10 | 6293  | 3078   | CFHR1    | 0.1052 | 1.2740 |
| 11052 | D10 | 5829  | 23057  | NMNAT2   | 0.1052 | 1.2740 |
| 31044 | B01 | 8964  | 84960  | KIAA1984 | 0.1052 | 1.2741 |
| 11067 | B02 | 7186  | 51530  | ZC3HC1   | 0.1053 | 1.2743 |
| 11048 | F10 | 537   | 133957 | CCDC127  | 0.1053 | 1.2743 |

|       |     |       |        |           |        |        |
|-------|-----|-------|--------|-----------|--------|--------|
| 11035 | A11 | 6312  | 11342  | RNF13     | 0.1053 | 1.2745 |
| 11061 | C03 | 1611  | 220082 | SPERT     | 0.1054 | 1.2745 |
| 51016 | B03 | 53731 | 84666  | RETNLB    | 0.1054 | 1.2746 |
| 11038 | F04 | 6153  | 10384  | BTN3A3    | 0.1054 | 1.2746 |
| 11013 | F05 | 4627  | 57486  | NLN       | 0.1054 | 1.2747 |
| 11035 | D01 | 4683  | 5160   | PDHA1     | 0.1055 | 1.2749 |
| 51012 | A08 | 53521 | 257236 | CCDC96    | 0.1055 | 1.2750 |
| 51012 | C08 | 54497 | 6580   | SLC22A1   | 0.1055 | 1.2750 |
| 51029 | C12 | 55647 | 58487  | CREBZF    | 0.1056 | 1.2752 |
| 11041 | B02 | 5139  | 85014  | TMEM141   | 0.1056 | 1.2753 |
| 51034 | A09 | 13856 | 29126  | CD274     | 0.1056 | 1.2753 |
| 11065 | H03 | 4890  | 284058 | KIAA1267  | 0.1056 | 1.2753 |
| 11085 | H06 | 6301  | 7762   | ZNF215    | 0.1056 | 1.2754 |
| 11042 | F01 | 1918  | 154089 | MGC34034  | 0.1056 | 1.2754 |
| 31037 | D07 | 13599 | 10257  | ABCC4     | 0.1057 | 1.2755 |
| 11050 | C07 | 7056  | 483    | ATP1B3    | 0.1057 | 1.2756 |
| 31033 | H02 | 14677 | 550    | AUP1      | 0.1057 | 1.2756 |
| 11068 | G10 | 7344  | 3500   | IGHG1     | 0.1058 | 1.2759 |
| 11043 | D03 | 7214  | 4097   | MAFG      | 0.1059 | 1.2760 |
| 51016 | D10 | 56146 | 8620   | NPFF      | 0.1059 | 1.2760 |
| 51005 | F08 | 56032 | 54221  | SNTG2     | 0.1059 | 1.2760 |
| 11034 | B12 | 4657  | 23640  | HSPBP1    | 0.1059 | 1.2761 |
| 11035 | F11 | 6054  | 118    | ADD1      | 0.1060 | 1.2763 |
| 51001 | A12 | 52622 | 54344  | DPM3      | 0.1060 | 1.2765 |
| 11067 | A01 | 543   | 83690  | CRISPLD1  | 0.1060 | 1.2765 |
| 11014 | D05 | 128   | 57326  | PBXIP1    | 0.1061 | 1.2767 |
| 11026 | C12 | 2737  | 1058   | CENPA     | 0.1061 | 1.2768 |
| 11010 | C04 | 733   | 64766  | S100BPB   | 0.1061 | 1.2768 |
| 51021 | H03 | 56653 | 3298   | HSF2      | 0.1062 | 1.2770 |
| 11058 | F04 | 2172  | 162681 | C18orf54  | 0.1063 | 1.2772 |
| 11083 | G01 | 8495  | 54360  | CYTL1     | 0.1063 | 1.2773 |
| 51011 | F03 | 54826 | 56139  | PCDHA10   | 0.1063 | 1.2773 |
| 51017 | F05 | 56111 | 134121 | C5orf49   | 0.1063 | 1.2773 |
| 51015 | B06 | 52868 | 26189  | OR1A2     | 0.1063 | 1.2774 |
| 11027 | F05 | 9506  | 51710  | ZNF44     | 0.1065 | 1.2778 |
| 11088 | F12 | 1432  | 11069  | RAPGEF4   | 0.1065 | 1.2780 |
| 31043 | C02 | 7355  | 5296   | PIK3R2    | 0.1065 | 1.2780 |
| 31034 | D02 | 14962 | 11014  | KDELR2    | 0.1066 | 1.2781 |
| 31003 | D06 | 10512 | 55157  | DARS2     | 0.1066 | 1.2782 |
| 51034 | F08 | 54410 | 25770  | C22orf31  | 0.1066 | 1.2782 |
| 11010 | A10 | 5966  | 8225   | GTPBP6    | 0.1067 | 1.2784 |
| 51002 | D03 | 52810 | 149134 | LOC149134 | 0.1067 | 1.2784 |
| 31007 | A10 | 11487 | 84268  | RPAIN     | 0.1068 | 1.2788 |
| 11029 | H03 | 8930  | 79039  | DDX54     | 0.1068 | 1.2788 |

|       |     |       |        |          |        |        |
|-------|-----|-------|--------|----------|--------|--------|
| 11015 | H11 | 5588  | 6373   | CXCL11   | 0.1068 | 1.2789 |
| 51021 | F05 | 55835 | 3267   | AGFG1    | 0.1068 | 1.2789 |
| 31022 | G11 | 13367 | 10431  | LOC10431 | 0.1069 | 1.2790 |
| 51022 | D06 | 56671 | 153769 | SH3RF2   | 0.1069 | 1.2790 |
| 11010 | E04 | 5883  | 5973   | RENBP    | 0.1069 | 1.2790 |
| 11057 | B10 | 6859  | 8892   | EIF2B2   | 0.1069 | 1.2790 |
| 11037 | G01 | 3219  | 84056  | KATNAL1  | 0.1069 | 1.2791 |
| 11032 | A07 | 7018  | 115817 | DHRS1    | 0.1069 | 1.2791 |
| 31037 | H05 | 14053 | 2797   | GNRH2    | 0.1069 | 1.2792 |
| 51028 | B07 | 53293 | 5414   | SEPT4    | 0.1070 | 1.2792 |
| 11014 | G01 | 8566  | 11325  | DDX42    | 0.1070 | 1.2793 |
| 11067 | G08 | 4139  | 55709  | KBTBD4   | 0.1070 | 1.2793 |
| 11076 | A04 | 3881  | 3437   | IFIT3    | 0.1070 | 1.2794 |
| 31006 | F10 | 11227 | 2140   | EYA3     | 0.1070 | 1.2794 |
| 31010 | A11 | 11351 | 80824  | DUSP16   | 0.1070 | 1.2794 |
| 31007 | H08 | 11134 | 58506  | SCAF1    | 0.1071 | 1.2795 |
| 11001 | A06 | 2752  | NA     | NA       | 0.1071 | 1.2797 |
| 11022 | B09 | 7268  | 25822  | DNAJB5   | 0.1071 | 1.2797 |
| 31012 | C11 | 11885 | 2483   | FRG1     | 0.1072 | 1.2798 |
| 11043 | C08 | 8243  | 6500   | SKP1     | 0.1072 | 1.2799 |
| 51021 | H11 | 56694 | 55015  | PRPF39   | 0.1072 | 1.2799 |
| 11067 | H02 | 9730  | 255394 | TCP11L2  | 0.1073 | 1.2801 |
| 31001 | F05 | 10787 | 375519 | GJB7     | 0.1074 | 1.2806 |
| 11014 | F09 | 5265  | 5211   | PFKL     | 0.1075 | 1.2807 |
| 11005 | H05 | 5719  | 8813   | DPM1     | 0.1075 | 1.2807 |
| 51010 | F06 | 54017 | 57595  | PDZD4    | 0.1076 | 1.2810 |
| 11074 | D12 | 1875  | 6141   | RPL18    | 0.1076 | 1.2811 |
| 51010 | D05 | 53052 | 4593   | MUSK     | 0.1076 | 1.2812 |
| 11043 | A11 | 5771  | 4259   | MGST3    | 0.1076 | 1.2813 |
| 51021 | E01 | 56383 | 11119  | BTN3A1   | 0.1077 | 1.2814 |
| 11066 | D02 | 274   | 3790   | KCNS3    | 0.1078 | 1.2817 |
| 51024 | E10 | 55153 | 4625   | MYH7     | 0.1079 | 1.2821 |
| 31018 | E04 | 12902 | 54812  | AFTPH    | 0.1080 | 1.2822 |
| 11013 | G09 | 3739  | 6850   | SYK      | 0.1080 | 1.2823 |
| 11032 | E06 | 7059  | 348013 | FAM70B   | 0.1080 | 1.2824 |
| 11065 | H07 | 1618  | 3433   | IFIT2    | 0.1080 | 1.2824 |
| 11056 | F10 | 8101  | 10613  | ERLIN1   | 0.1081 | 1.2826 |
| 51015 | D09 | 52903 | 9997   | SCO2     | 0.1081 | 1.2826 |
| 11019 | H08 | 3340  | 55608  | ANKRD10  | 0.1081 | 1.2826 |
| 31015 | H03 | 12461 | 80335  | WDR82    | 0.1082 | 1.2828 |
| 11056 | H01 | 8511  | 118672 | PSTK     | 0.1082 | 1.2828 |
| 11011 | F02 | 5240  | 8463   | TEAD2    | 0.1082 | 1.2829 |
| 11050 | G05 | 382   | 116224 | FAM122A  | 0.1082 | 1.2829 |
| 11065 | G02 | 7666  | 23516  | SLC39A14 | 0.1083 | 1.2832 |

|       |     |       |        |          |        |        |
|-------|-----|-------|--------|----------|--------|--------|
| 11022 | D08 | 7683  | 5429   | POLH     | 0.1083 | 1.2833 |
| 11006 | G01 | 2208  | 138046 | RALYL    | 0.1083 | 1.2833 |
| 11064 | H02 | 1259  | 4208   | MEF2C    | 0.1083 | 1.2834 |
| 11058 | B02 | 2789  | 3105   | HLA-A    | 0.1084 | 1.2835 |
| 11056 | C04 | 3772  | 5985   | RFC5     | 0.1084 | 1.2836 |
| 11081 | D05 | 1537  | 11341  | SCRG1    | 0.1084 | 1.2836 |
| 51026 | H04 | 55876 | 56145  | PCDHA3   | 0.1085 | 1.2838 |
| 51016 | A05 | 55740 | 140596 | DEFB104A | 0.1085 | 1.2838 |
| 11034 | H07 | 6903  | 54903  | MKS1     | 0.1085 | 1.2838 |
| 11037 | G05 | 4935  | 6570   | SLC18A1  | 0.1086 | 1.2842 |
| 11029 | D09 | 3960  | 6388   | SDF2     | 0.1087 | 1.2843 |
| 11032 | H01 | 10027 | 51326  | ARL17A   | 0.1087 | 1.2844 |
| 51030 | B12 | 55531 | 54840  | APTX     | 0.1087 | 1.2845 |
| 51022 | A08 | 55825 | 51224  | TCEB3B   | 0.1088 | 1.2846 |
| 11035 | G08 | 6391  | 51095  | TRNT1    | 0.1088 | 1.2846 |
| 51026 | A06 | 55542 | 57591  | MKL1     | 0.1088 | 1.2847 |
| 11046 | D05 | 9798  | 116841 | SNAP47   | 0.1088 | 1.2848 |
| 11018 | C06 | 7504  | 51187  | RSL24D1  | 0.1089 | 1.2849 |
| 11036 | H07 | 9459  | 3811   | KIR3DL1  | 0.1089 | 1.2851 |
| 11030 | H06 | 7222  | 57103  | C12orf5  | 0.1089 | 1.2851 |
| 11063 | A01 | 1264  | 59271  | C21orf63 | 0.1089 | 1.2851 |
| 11010 | C06 | 6204  | 171586 | ABHD3    | 0.1090 | 1.2854 |
| 11050 | F07 | 4759  | 79720  | VPS37B   | 0.1091 | 1.2857 |
| 11034 | A12 | 6861  | 30968  | STOML2   | 0.1091 | 1.2857 |
| 31018 | G06 | 13235 | 286    | ANK1     | 0.1091 | 1.2857 |
| 51013 | G05 | 54142 | 10562  | OLFM4    | 0.1092 | 1.2858 |
| 11041 | E11 | 6371  | 29058  | C20orf30 | 0.1092 | 1.2859 |
| 11019 | E08 | 6578  | 5511   | PPP1R8   | 0.1092 | 1.2859 |
| 11054 | F05 | 6423  | 5713   | PSMD7    | 0.1093 | 1.2861 |
| 11088 | D02 | 5986  | 28966  | SNX24    | 0.1093 | 1.2862 |
| 11065 | D05 | 8254  | 3788   | KCNS2    | 0.1095 | 1.2868 |
| 11081 | H02 | 9627  | 401466 | C8orf59  | 0.1095 | 1.2868 |
| 31009 | A12 | 11829 | 54575  | UGT1A10  | 0.1096 | 1.2871 |
| 11055 | D04 | 2826  | 2841   | GPR18    | 0.1097 | 1.2874 |
| 11083 | B07 | 7724  | 80045  | GPR157   | 0.1097 | 1.2875 |
| 31018 | F09 | 13011 | 2822   | GPLD1    | 0.1097 | 1.2875 |
| 31016 | H04 | 12827 | 81285  | OR51E2   | 0.1098 | 1.2876 |
| 11027 | G04 | 586   | 2872   | MKNK2    | 0.1098 | 1.2877 |
| 11064 | C09 | 1926  | 257169 | C9orf43  | 0.1099 | 1.2879 |
| 11014 | C09 | 252   | 79797  | ZNF408   | 0.1100 | 1.2883 |
| 11050 | H06 | 6415  | 9200   | PTPLA    | 0.1101 | 1.2884 |
| 11005 | E11 | 741   | 7035   | TFPI     | 0.1101 | 1.2884 |
| 11051 | F09 | 138   | 4615   | MYD88    | 0.1101 | 1.2886 |
| 51016 | A01 | 54660 | 138240 | C9orf57  | 0.1103 | 1.2892 |

|       |     |       |        |          |        |        |
|-------|-----|-------|--------|----------|--------|--------|
| 11049 | A10 | 9071  | 9139   | CBFA2T2  | 0.1104 | 1.2893 |
| 51024 | A08 | 55154 | 9928   | KIF14    | 0.1105 | 1.2896 |
| 11034 | B10 | 1186  | 185    | AGTR1    | 0.1105 | 1.2897 |
| 51020 | H10 | 56641 | 55890  | GPRC5C   | 0.1105 | 1.2898 |
| 11019 | B08 | 4040  | 56681  | SAR1A    | 0.1105 | 1.2898 |
| 11013 | D12 | 1298  | 30061  | SLC40A1  | 0.1106 | 1.2899 |
| 31028 | C02 | 14509 | 3713   | IVL      | 0.1108 | 1.2906 |
| 31017 | C09 | 12996 | 7033   | TFF3     | 0.1108 | 1.2906 |
| 11038 | D09 | 5091  | 84527  | ZNF559   | 0.1108 | 1.2906 |
| 11057 | C02 | 1048  | 29766  | TMOD3    | 0.1109 | 1.2908 |
| 51014 | A09 | 52874 | 64211  | LHX5     | 0.1109 | 1.2908 |
| 11015 | G07 | 6396  | 51259  | TMEM216  | 0.1109 | 1.2909 |
| 11024 | C05 | 4433  | 25904  | CNOT10   | 0.1109 | 1.2910 |
| 11041 | A09 | 5537  | 2745   | GLRX     | 0.1110 | 1.2911 |
| 31010 | A07 | 11328 | 631    | BFSP1    | 0.1110 | 1.2912 |
| 31026 | F09 | 14032 | 29935  | RPA4     | 0.1110 | 1.2912 |
| 51023 | B10 | 54655 | 260425 | MAGI3    | 0.1111 | 1.2915 |
| 11066 | A09 | 3018  | 10307  | APBB3    | 0.1111 | 1.2915 |
| 11011 | C08 | 7679  | 55277  | FGGY     | 0.1111 | 1.2915 |
| 11053 | B09 | 311   | 4100   | MAGEA1   | 0.1111 | 1.2916 |
| 11054 | F11 | 4527  | 705    | BYSL     | 0.1112 | 1.2917 |
| 11017 | A11 | 5695  | 84300  | C6orf125 | 0.1112 | 1.2918 |
| 11065 | B01 | 1153  | 79918  | SETD6    | 0.1113 | 1.2920 |
| 11070 | H06 | 9471  | 9466   | IL27RA   | 0.1114 | 1.2923 |
| 51025 | H05 | 56882 | 57579  | FAM135A  | 0.1114 | 1.2923 |
| 31003 | E07 | 10698 | 23111  | SPG20    | 0.1114 | 1.2925 |
| 31018 | B05 | 13031 | 84868  | HAVCR2   | 0.1118 | 1.2935 |
| 11043 | D08 | 6487  | 51187  | RSL24D1  | 0.1118 | 1.2935 |
| 31012 | C10 | 12110 | 55132  | LARP1B   | 0.1119 | 1.2939 |
| 51002 | A12 | 53083 | 151278 | CCDC140  | 0.1119 | 1.2939 |
| 51004 | C01 | 52664 | 55010  | C12orf48 | 0.1119 | 1.2939 |
| 51032 | E02 | 56476 | 55018  | C17orf73 | 0.1119 | 1.2940 |
| 11032 | F07 | 10128 | 116159 | CYYR1    | 0.1120 | 1.2943 |
| 31006 | A05 | 11295 | 7621   | ZNF70    | 0.1121 | 1.2946 |
| 51015 | F06 | 52669 | 7350   | UCP1     | 0.1123 | 1.2950 |
| 11065 | D06 | 9881  | 51127  | TRIM17   | 0.1123 | 1.2950 |
| 31021 | D11 | 12952 | 338094 | FAM151A  | 0.1123 | 1.2951 |
| 11065 | H11 | 753   | 51193  | ZNF639   | 0.1123 | 1.2952 |
| 11063 | E04 | 1086  | 26608  | TBL2     | 0.1124 | 1.2954 |
| 11040 | A08 | 8957  | 23174  | ZCCHC14  | 0.1124 | 1.2954 |
| 11063 | E02 | 3779  | 4245   | MGAT1    | 0.1124 | 1.2954 |
| 11068 | H01 | 7308  | 9815   | GIT2     | 0.1125 | 1.2957 |
| 11014 | D09 | 6277  | 81887  | LAS1L    | 0.1125 | 1.2957 |
| 11077 | B02 | 1268  | 9211   | LGI1     | 0.1126 | 1.2959 |

|       |     |       |        |           |        |        |
|-------|-----|-------|--------|-----------|--------|--------|
| 51014 | B03 | 53709 | 1326   | MAP3K8    | 0.1126 | 1.2960 |
| 31023 | B11 | 13366 | 6514   | SLC2A2    | 0.1127 | 1.2961 |
| 11052 | H02 | 3358  | 6871   | TADA2A    | 0.1127 | 1.2962 |
| 11049 | B06 | 8976  | 84171  | LOXL4     | 0.1127 | 1.2962 |
| 31044 | F11 | 1780  | 222008 | VSTM2A    | 0.1127 | 1.2963 |
| 31015 | C10 | 12679 | 28793  | IGLV3-25  | 0.1128 | 1.2966 |
| 51014 | A04 | 52904 | 1118   | CHIT1     | 0.1130 | 1.2971 |
| 11051 | H08 | 8948  | 55775  | TDP1      | 0.1130 | 1.2971 |
| 31012 | F08 | 12160 | 284338 | PRR19     | 0.1130 | 1.2972 |
| 51025 | E11 | 53267 | 4638   | MYLK      | 0.1131 | 1.2973 |
| 51018 | H06 | 56526 | 26097  | C1orf77   | 0.1131 | 1.2974 |
| 11005 | H10 | 8328  | 759    | CA1       | 0.1132 | 1.2977 |
| 11008 | C03 | 299   | 64112  | MOAP1     | 0.1132 | 1.2977 |
| 11085 | A05 | 7204  | 54814  | QPCTL     | 0.1132 | 1.2978 |
| 31023 | G06 | 13505 | 26260  | FBXO25    | 0.1132 | 1.2979 |
| 11067 | A04 | 9637  | 7186   | TRAF2     | 0.1133 | 1.2979 |
| 51008 | H08 | 56354 | 8202   | NCOA3     | 0.1133 | 1.2980 |
| 11066 | B10 | 9770  | 158427 | TSTD2     | 0.1133 | 1.2980 |
| 11037 | D12 | 3988  | 5425   | POLD2     | 0.1133 | 1.2981 |
| 11046 | C05 | 8084  | 9045   | RPL14     | 0.1135 | 1.2986 |
| 51024 | A10 | 56287 | 8729   | GBF1      | 0.1135 | 1.2986 |
| 11066 | A11 | 6569  | 79690  | GAL3ST4   | 0.1135 | 1.2988 |
| 31043 | H02 | 7522  | 509    | ATP5C1    | 0.1137 | 1.2991 |
| 31040 | E07 | 9980  | 5450   | POU2AF1   | 0.1137 | 1.2992 |
| 31018 | A03 | 13159 | 129446 | XIRP2     | 0.1137 | 1.2992 |
| 11046 | G07 | 6838  | 65265  | C8orf33   | 0.1138 | 1.2995 |
| 31033 | B01 | 14687 | 4074   | M6PR      | 0.1139 | 1.2998 |
| 51035 | A01 | 53734 | 6975   | TECTB     | 0.1139 | 1.2998 |
| 51008 | E12 | 53116 | 5794   | PTPRH     | 0.1139 | 1.2999 |
| 11067 | E07 | 2583  | 27079  | RPUSD2    | 0.1139 | 1.3000 |
| 11055 | A09 | 764   | 51377  | UCHL5     | 0.1140 | 1.3001 |
| 31012 | E07 | 12284 | 9789   | SPCS2     | 0.1140 | 1.3001 |
| 51011 | H07 | 54487 | 60494  | CCDC81    | 0.1141 | 1.3006 |
| 11073 | F12 | 967   | 241    | ALOX5AP   | 0.1141 | 1.3006 |
| 11057 | G01 | 4213  | 83759  | RBM4B     | 0.1142 | 1.3006 |
| 51002 | A08 | 54807 | 149950 | LOC149950 | 0.1143 | 1.3010 |
| 11065 | A12 | 878   | 84446  | BRSK1     | 0.1143 | 1.3011 |
| 31038 | D11 | 10196 | 54946  | SLC41A3   | 0.1144 | 1.3013 |
| 11062 | A01 | 5529  | 34     | ACADM     | 0.1144 | 1.3014 |
| 31020 | F09 | 13035 | 55303  | GIMAP4    | 0.1145 | 1.3016 |
| 11034 | F06 | 9771  | 4287   | ATXN3     | 0.1145 | 1.3016 |
| 11046 | C04 | 2427  | 665    | BNIP3L    | 0.1145 | 1.3017 |
| 11046 | G01 | 2656  | 116225 | ZMYND19   | 0.1147 | 1.3021 |
| 51021 | G10 | 55736 | 2035   | EPB41     | 0.1147 | 1.3021 |

|       |     |       |        |          |        |        |
|-------|-----|-------|--------|----------|--------|--------|
| 31004 | F08 | 11121 | 55083  | KIF26B   | 0.1147 | 1.3023 |
| 11084 | C01 | 2213  | 51266  | CLEC1B   | 0.1148 | 1.3025 |
| 11071 | B02 | 9856  | 50613  | UBQLN3   | 0.1148 | 1.3026 |
| 11024 | B07 | 4650  | 55191  | NADSYN1  | 0.1149 | 1.3028 |
| 31014 | C06 | 12167 | 80339  | PNPLA3   | 0.1149 | 1.3029 |
| 11049 | H05 | 4424  | 9587   | MAD2L1BP | 0.1150 | 1.3031 |
| 51014 | E02 | 53512 | 4321   | MMP12    | 0.1150 | 1.3031 |
| 31031 | G10 | 14567 | 25945  | PVRL3    | 0.1150 | 1.3031 |
| 11047 | E03 | 797   | 51444  | RNF138   | 0.1151 | 1.3034 |
| 31010 | H05 | 11626 | 283989 | TSEN54   | 0.1151 | 1.3035 |
| 11076 | D11 | 4605  | 3836   | KPNA1    | 0.1151 | 1.3036 |
| 11055 | D11 | 4115  | 3455   | IFNAR2   | 0.1152 | 1.3037 |
| 31014 | F02 | 12061 | 57162  | PELI1    | 0.1152 | 1.3037 |
| 31030 | F03 | 14319 | 4194   | MDM4     | 0.1153 | 1.3039 |
| 11072 | A01 | 2393  | 5597   | MAPK6    | 0.1153 | 1.3041 |
| 11064 | F10 | 8397  | 64925  | CCDC71   | 0.1153 | 1.3041 |
| 11064 | B07 | 2703  | 54995  | OXSM     | 0.1153 | 1.3042 |
| 11028 | B04 | 1290  | 5502   | PPP1R1A  | 0.1155 | 1.3046 |
| 51023 | A08 | 56254 | 8720   | MBTPS1   | 0.1155 | 1.3046 |
| 11065 | H08 | 10171 | 5277   | PIGA     | 0.1155 | 1.3047 |
| 11068 | A12 | 4501  | 993    | CDC25A   | 0.1155 | 1.3048 |
| 11087 | C06 | 5848  | 3074   | HEXB     | 0.1155 | 1.3048 |
| 31022 | D07 | 13759 | 6955   | TRA@     | 0.1157 | 1.3052 |
| 31002 | A07 | 10305 | 83548  | COG3     | 0.1157 | 1.3052 |
| 11052 | G08 | 559   | 961    | CD47     | 0.1157 | 1.3054 |
| 11041 | A03 | 4960  | 5092   | PCBD1    | 0.1158 | 1.3055 |
| 11014 | E10 | 2713  | 4292   | MLH1     | 0.1158 | 1.3055 |
| 11018 | C05 | 7414  | 51187  | RSL24D1  | 0.1158 | 1.3056 |
| 51025 | E10 | 55353 | 4641   | MYO1C    | 0.1158 | 1.3057 |
| 11021 | C05 | 5476  | 10136  | CELA3A   | 0.1159 | 1.3058 |
| 11035 | C11 | 3267  | 7251   | TSG101   | 0.1159 | 1.3060 |
| 11032 | G11 | 7409  | 116254 | C6orf72  | 0.1159 | 1.3060 |
| 11025 | B04 | 9406  | 463    | ZFHX3    | 0.1160 | 1.3060 |
| 11047 | F03 | 5014  | 80213  | TM2D3    | 0.1160 | 1.3063 |
| 11074 | E03 | 3944  | 1649   | DDIT3    | 0.1161 | 1.3065 |
| 11058 | D02 | 9205  | 91768  | CABLES1  | 0.1163 | 1.3071 |
| 51031 | A09 | 55311 | 10123  | ARL4C    | 0.1163 | 1.3071 |
| 31026 | F03 | 13817 | 57644  | MYH7B    | 0.1163 | 1.3071 |
| 11034 | A05 | 3277  | 2780   | GNAT2    | 0.1164 | 1.3073 |
| 11044 | A04 | 640   | 10874  | NMU      | 0.1164 | 1.3073 |
| 31023 | D10 | 13607 | 7392   | USF2     | 0.1165 | 1.3075 |
| 11066 | E01 | 3098  | 55650  | PIGV     | 0.1165 | 1.3076 |
| 11068 | D08 | 1368  | 1998   | ELF2     | 0.1165 | 1.3077 |
| 11046 | A02 | 4169  | 79159  | NOL12    | 0.1166 | 1.3081 |

|       |     |       |        |            |        |        |
|-------|-----|-------|--------|------------|--------|--------|
| 11011 | E09 | 279   | 10241  | CALCOCO2   | 0.1167 | 1.3082 |
| 11045 | B11 | 9387  | 284418 | FAM71E2    | 0.1167 | 1.3084 |
| 51032 | A05 | 55229 | 57129  | MRPL47     | 0.1168 | 1.3087 |
| 31031 | B08 | 14638 | 7417   | VDAC2      | 0.1169 | 1.3088 |
| 31014 | H08 | 12005 | 84867  | PTPN5      | 0.1169 | 1.3088 |
| 51015 | A04 | 52857 | 7855   | FZD5       | 0.1169 | 1.3089 |
| 51028 | A03 | 53272 | 84448  | ABLIM2     | 0.1170 | 1.3093 |
| 51021 | G07 | 56037 | 114781 | BTBD9      | 0.1170 | 1.3093 |
| 11024 | A08 | 4720  | 51703  | ACSL5      | 0.1171 | 1.3094 |
| 11051 | A05 | 4984  | 25806  | VAX2       | 0.1171 | 1.3094 |
| 11010 | G10 | 391   | 12     | SERPINA3   | 0.1171 | 1.3096 |
| 11069 | C12 | 9526  | 84179  | MFSD7      | 0.1172 | 1.3098 |
| 11065 | B02 | 3012  | 2562   | GABRB3     | 0.1172 | 1.3098 |
| 11053 | D08 | 6145  | 51144  | HSD17B12   | 0.1173 | 1.3101 |
| 11084 | F06 | 9140  | 221    | ALDH3B1    | 0.1173 | 1.3102 |
| 11065 | D02 | 943   | 55006  | TRMT61B    | 0.1174 | 1.3104 |
| 11052 | H07 | 5732  | 5538   | PPT1       | 0.1175 | 1.3106 |
| 11037 | D05 | 6280  | 3500   | IGHG1      | 0.1175 | 1.3107 |
| 11042 | A10 | 8972  | 9043   | SPAG9      | 0.1175 | 1.3107 |
| 51033 | E07 | 53691 | NA     | NA         | 0.1175 | 1.3107 |
| 51004 | D09 | 56525 | 386678 | KRTAP10-11 | 0.1175 | 1.3108 |
| 11044 | H10 | 1687  | 637    | BID        | 0.1176 | 1.3109 |
| 11014 | G11 | 2929  | 2891   | GRIA2      | 0.1176 | 1.3109 |
| 11065 | F05 | 638   | 84898  | PLXDC2     | 0.1176 | 1.3110 |
| 51027 | A06 | 56391 | 6401   | SELE       | 0.1176 | 1.3110 |
| 51002 | E04 | 53555 | 8329   | HIST1H2AI  | 0.1177 | 1.3113 |
| 51033 | H09 | 54873 | 388325 | C17orf87   | 0.1177 | 1.3114 |
| 31008 | D08 | 11747 | 84333  | PCGF5      | 0.1178 | 1.3115 |
| 11041 | G07 | 6739  | NA     | NA         | 0.1178 | 1.3117 |
| 11010 | E12 | 3008  | 55290  | BRF2       | 0.1179 | 1.3118 |
| 11003 | C10 | 9014  | 25963  | TMEM87A    | 0.1179 | 1.3118 |
| 11063 | D07 | 2550  | 10383  | TUBB2C     | 0.1182 | 1.3127 |
| 51032 | B07 | 55364 | 388753 | C1orf31    | 0.1183 | 1.3132 |
| 11055 | E11 | 913   | 8894   | EIF2S2     | 0.1183 | 1.3132 |
| 11014 | G02 | 3055  | 23032  | USP33      | 0.1185 | 1.3137 |
| 11004 | D07 | 522   | 131177 | FAM3D      | 0.1186 | 1.3139 |
| 11042 | A08 | 5506  | 5303   | PIN4       | 0.1186 | 1.3141 |
| 31033 | E03 | 14685 | 51292  | GMPR2      | 0.1187 | 1.3142 |
| 31036 | E09 | 12388 | 80010  | RMI1       | 0.1187 | 1.3144 |
| 51033 | H07 | 53626 | 199834 | LCE4A      | 0.1188 | 1.3145 |
| 11066 | A12 | 6633  | 55572  | FOXRED1    | 0.1188 | 1.3145 |
| 11088 | E11 | 994   | 23398  | PPWD1      | 0.1189 | 1.3148 |
| 11053 | C10 | 5186  | 54707  | GPN2       | 0.1189 | 1.3148 |
| 11067 | C09 | 9159  | 3055   | HCK        | 0.1189 | 1.3149 |



|       |     |       |        |           |        |        |
|-------|-----|-------|--------|-----------|--------|--------|
| 11037 | B07 | 6011  | 3418   | IDH2      | 0.1189 | 1.3149 |
| 51022 | A12 | 56192 | 51092  | SIDT2     | 0.1190 | 1.3153 |
| 11035 | D03 | 1674  | 56983  | KTELC1    | 0.1191 | 1.3154 |
| 31002 | B07 | 10351 | 2742   | GLRA2     | 0.1191 | 1.3155 |
| 51012 | B07 | 53935 | 26576  | SRPK3     | 0.1191 | 1.3155 |
| 11052 | E07 | 8176  | 126789 | PUSL1     | 0.1193 | 1.3161 |
| 11034 | H09 | 1273  | 11197  | WIF1      | 0.1194 | 1.3164 |
| 11034 | D12 | 2069  | 6925   | TCF4      | 0.1194 | 1.3165 |
| 11048 | H11 | 2679  | 115560 | ZNF501    | 0.1195 | 1.3167 |
| 11034 | B06 | 7942  | 3133   | HLA-E     | 0.1196 | 1.3170 |
| 31006 | A12 | 11159 | 30061  | SLC40A1   | 0.1196 | 1.3170 |
| 11010 | C01 | 459   | 55274  | PHF10     | 0.1196 | 1.3171 |
| 11059 | F09 | 3017  | 112840 | WDR89     | 0.1196 | 1.3172 |
| 31003 | F01 | 10679 | 5962   | RDX       | 0.1197 | 1.3173 |
| 11010 | G06 | 898   | 10053  | AP1M2     | 0.1197 | 1.3173 |
| 11034 | F12 | 8053  | 3283   | HSD3B1    | 0.1197 | 1.3174 |
| 11010 | G08 | 6146  | 3712   | IVD       | 0.1198 | 1.3175 |
| 31027 | C03 | 14033 | 3354   | HTR1E     | 0.1198 | 1.3177 |
| 11018 | A07 | 9103  | 3268   | AGFG2     | 0.1199 | 1.3180 |
| 51034 | G04 | 54975 | 123688 | AGPHD1    | 0.1199 | 1.3181 |
| 11081 | A06 | 7096  | 155370 | SBDSP1    | 0.1200 | 1.3184 |
| 11011 | G08 | 2924  | 93145  | OLFM2     | 0.1201 | 1.3185 |
| 31026 | E09 | 14027 | 4908   | NTF3      | 0.1201 | 1.3185 |
| 31039 | E06 | 8596  | 728392 | LOC728392 | 0.1202 | 1.3188 |
| 11008 | D04 | 2908  | 23580  | CDC42EP4  | 0.1203 | 1.3191 |
| 11019 | D08 | 3688  | 79091  | C16orf68  | 0.1203 | 1.3191 |
| 51023 | B01 | 56292 | 7227   | TRPS1     | 0.1203 | 1.3193 |
| 31013 | E02 | 12367 | 51526  | C20orf111 | 0.1205 | 1.3199 |
| 11058 | A07 | 8041  | 10455  | PECI      | 0.1206 | 1.3200 |
| 11037 | B05 | 3197  | 835    | CASP2     | 0.1206 | 1.3201 |
| 31006 | B02 | 11219 | 5023   | P2RX1     | 0.1206 | 1.3201 |
| 11046 | F06 | 1062  | 54896  | PQLC2     | 0.1207 | 1.3204 |
| 31012 | H04 | 12065 | 79583  | TMEM231   | 0.1208 | 1.3206 |
| 51031 | C03 | 56897 | 80177  | MYCT1     | 0.1208 | 1.3207 |
| 11026 | A01 | 8633  | 5583   | PRKCH     | 0.1209 | 1.3209 |
| 11053 | F09 | 254   | 8402   | SLC25A11  | 0.1209 | 1.3209 |
| 11040 | G07 | 7526  | 56849  | TCEAL7    | 0.1212 | 1.3220 |
| 11063 | E01 | 4434  | 79581  | GPR172A   | 0.1212 | 1.3220 |
| 11019 | D02 | 9170  | 22926  | ATF6      | 0.1212 | 1.3220 |
| 31020 | C08 | 13018 | 10894  | LYVE1     | 0.1214 | 1.3225 |
| 51022 | C01 | 55855 | 3849   | KRT2      | 0.1215 | 1.3227 |
| 11076 | D10 | 9578  | 57546  | PDP2      | 0.1215 | 1.3228 |
| 31012 | D10 | 12044 | 64764  | CREB3L2   | 0.1216 | 1.3232 |
| 31005 | H05 | 10997 | 79635  | CCDC121   | 0.1217 | 1.3233 |

|       |     |       |        |         |        |        |
|-------|-----|-------|--------|---------|--------|--------|
| 31001 | C01 | 10597 | 255330 | C3orf46 | 0.1217 | 1.3234 |
| 11025 | F07 | 2057  | 10733  | PLK4    | 0.1217 | 1.3235 |
| 51022 | A06 | 56340 | 5317   | PKP1    | 0.1217 | 1.3235 |
| 11026 | D02 | 1803  | 4698   | NDUFA5  | 0.1217 | 1.3236 |
| 11027 | F08 | 604   | 3397   | ID1     | 0.1218 | 1.3238 |
| 31013 | E11 | 12334 | 23648  | SSBP3   | 0.1219 | 1.3239 |
| 11011 | G01 | 6115  | 10376  | TUBA1B  | 0.1219 | 1.3240 |
| 11054 | B03 | 2571  | 8836   | GGH     | 0.1219 | 1.3241 |
| 51023 | B12 | 53687 | 3635   | INPP5D  | 0.1220 | 1.3242 |
| 11011 | A11 | 361   | 65983  | GRAMD3  | 0.1220 | 1.3243 |
| 11070 | E07 | 6665  | 3507   | IGHM    | 0.1221 | 1.3245 |
| 31005 | F03 | 10878 | 10620  | ARID3B  | 0.1221 | 1.3246 |
| 11025 | A10 | 2238  | 158248 | TTC16   | 0.1221 | 1.3247 |
| 11051 | D11 | 2090  | 81833  | SPACA1  | 0.1222 | 1.3248 |
| 31014 | F10 | 11863 | 126969 | SLC44A3 | 0.1222 | 1.3250 |
| 51020 | H05 | 56279 | 5733   | PTGER3  | 0.1224 | 1.3255 |
| 11044 | H05 | 6905  | 3704   | ITPA    | 0.1224 | 1.3256 |
| 11015 | F04 | 3329  | 4826   | NNAT    | 0.1224 | 1.3257 |
| 31045 | E01 | 717   | 54504  | CPVL    | 0.1225 | 1.3258 |
| 11073 | C11 | 4482  | 4828   | NMB     | 0.1226 | 1.3262 |
| 31002 | E11 | 10309 | 4133   | MAP2    | 0.1226 | 1.3263 |
| 31007 | B02 | 11174 | 330    | BIRC3   | 0.1227 | 1.3264 |
| 11034 | F01 | 9436  | 151126 | ZNF385B | 0.1228 | 1.3267 |
| 51026 | C03 | 56312 | 122402 | TDRD9   | 0.1229 | 1.3271 |
| 51022 | H07 | 56251 | 1608   | DGKG    | 0.1230 | 1.3273 |
| 11073 | D02 | 4148  | 1396   | CRIP1   | 0.1231 | 1.3278 |
| 31007 | D05 | 11236 | 151636 | DTX3L   | 0.1231 | 1.3278 |
| 11049 | H06 | 5311  | 65263  | PYCR1   | 0.1232 | 1.3279 |
| 11008 | D11 | 582   | 51008  | ASCC1   | 0.1232 | 1.3280 |
| 11014 | B04 | 310   | 9836   | LCMT2   | 0.1233 | 1.3282 |
| 31012 | A05 | 11833 | 84545  | MRPL43  | 0.1234 | 1.3285 |
| 11026 | D09 | 9192  | 57380  | MRS2    | 0.1234 | 1.3285 |
| 11034 | B01 | 7779  | 10960  | LMAN2   | 0.1234 | 1.3286 |
| 31043 | A02 | 7385  | 79315  | OR7E91P | 0.1234 | 1.3287 |
| 11032 | A02 | 6656  | 8613   | PPAP2B  | 0.1235 | 1.3288 |
| 11015 | A06 | 9175  | 118812 | MORN4   | 0.1235 | 1.3289 |
| 11070 | C07 | 6469  | 4929   | NR4A2   | 0.1235 | 1.3289 |
| 11005 | C12 | 2818  | 714    | C1QC    | 0.1236 | 1.3291 |
| 11047 | H05 | 6243  | 3219   | HOXB9   | 0.1237 | 1.3294 |
| 31001 | G01 | 10336 | 139341 | FUNDC1  | 0.1237 | 1.3296 |
| 11057 | B09 | 10240 | 5568   | PRKACG  | 0.1237 | 1.3297 |
| 51004 | G08 | 55425 | 283150 | FOXR1   | 0.1238 | 1.3297 |
| 11012 | H11 | 4014  | 1136   | CHRNA3  | 0.1238 | 1.3298 |
| 31038 | D12 | 9496  | 3587   | IL10RA  | 0.1239 | 1.3301 |

|       |     |       |        |          |        |        |
|-------|-----|-------|--------|----------|--------|--------|
| 51004 | B09 | 55046 | 387914 | SHISA2   | 0.1240 | 1.3303 |
| 31043 | A01 | 5469  | 1837   | DTNA     | 0.1240 | 1.3303 |
| 11005 | E06 | 9745  | 121599 | SPIC     | 0.1240 | 1.3304 |
| 51025 | F05 | 56877 | 23035  | PHLPP2   | 0.1240 | 1.3304 |
| 31044 | B12 | 1593  | 219670 | ENKUR    | 0.1241 | 1.3307 |
| 31037 | F08 | 15039 | 5225   | PGC      | 0.1242 | 1.3310 |
| 11073 | C05 | 4167  | 79161  | C7orf23  | 0.1242 | 1.3310 |
| 11076 | C10 | 2598  | 23291  | FBXW11   | 0.1242 | 1.3311 |
| 11082 | A12 | 6099  | 6210   | RPS15A   | 0.1244 | 1.3317 |
| 11071 | G04 | 1465  | 84126  | ATRIP    | 0.1244 | 1.3318 |
| 11065 | F11 | 7744  | 3507   | IGHM     | 0.1245 | 1.3321 |
| 51031 | F01 | 56566 | 56244  | BTNL2    | 0.1246 | 1.3323 |
| 51030 | D05 | 55252 | 260294 | NSUN5P2  | 0.1247 | 1.3324 |
| 11041 | A06 | 2013  | 3753   | KCNE1    | 0.1247 | 1.3325 |
| 11068 | A10 | 7078  | 10385  | BTN2A2   | 0.1248 | 1.3328 |
| 31040 | D12 | 7106  | 9143   | SYNGR3   | 0.1248 | 1.3330 |
| 11086 | G03 | 9761  | 55251  | PCMTD2   | 0.1249 | 1.3331 |
| 31038 | F02 | 14745 | 23301  | EHBP1    | 0.1249 | 1.3332 |
| 11040 | F03 | 8759  | 123355 | LRRC28   | 0.1249 | 1.3333 |
| 11008 | B07 | 35    | 11171  | STRAP    | 0.1249 | 1.3334 |
| 11040 | F07 | 2558  | 389741 | MGC21881 | 0.1250 | 1.3335 |
| 11067 | A02 | 6939  | 51588  | PIAS4    | 0.1251 | 1.3337 |
| 51024 | C11 | 56351 | 9320   | TRIP12   | 0.1251 | 1.3339 |
| 31034 | E03 | 14918 | 23198  | PSME4    | 0.1253 | 1.3345 |
| 51028 | D05 | 55555 | 151835 | CPNE9    | 0.1254 | 1.3348 |
| 11059 | F12 | 10141 | 157    | ADRBK2   | 0.1254 | 1.3349 |
| 31024 | H03 | 13517 | 221    | ALDH3B1  | 0.1255 | 1.3350 |
| 11010 | E07 | 2684  | 9221   | NOLC1    | 0.1255 | 1.3351 |
| 51033 | E09 | 53459 | 144809 | C13orf30 | 0.1256 | 1.3352 |
| 11035 | F06 | 9644  | 13     | AADAC    | 0.1256 | 1.3352 |
| 31003 | E02 | 10528 | 136895 | C7orf31  | 0.1256 | 1.3353 |
| 51017 | H07 | 56601 | 54058  | C21orf58 | 0.1257 | 1.3355 |
| 11054 | G05 | 351   | 55754  | TMEM30A  | 0.1257 | 1.3357 |
| 51014 | C08 | 53016 | 51059  | FAM135B  | 0.1258 | 1.3360 |
| 51001 | G07 | 52625 | 284274 | C18orf62 | 0.1259 | 1.3364 |
| 11032 | C05 | 7756  | 27063  | ANKRD1   | 0.1261 | 1.3368 |
| 31024 | C02 | 13617 | 26580  | BSCL2    | 0.1261 | 1.3368 |
| 31029 | H07 | 14333 | 2635   | GBP3     | 0.1261 | 1.3369 |
| 11010 | D03 | 208   | 57561  | ARRDC3   | 0.1261 | 1.3370 |
| 31008 | H05 | 11532 | 398    | ARHGDI3  | 0.1264 | 1.3378 |
| 11020 | F06 | 7966  | 5860   | QDPR     | 0.1264 | 1.3379 |
| 31043 | B06 | 7605  | 64927  | TTC23    | 0.1264 | 1.3379 |
| 51011 | F10 | 52961 | 219988 | PATL1    | 0.1264 | 1.3379 |
| 11041 | B08 | 4491  | 84844  | PHF5A    | 0.1264 | 1.3380 |

|       |     |       |        |          |        |        |
|-------|-----|-------|--------|----------|--------|--------|
| 11044 | B03 | 9136  | 9413   | FAM189A2 | 0.1265 | 1.3382 |
| 31004 | A05 | 10987 | 246184 | CDC26    | 0.1266 | 1.3385 |
| 51024 | C08 | 55156 | 727    | C5       | 0.1267 | 1.3386 |
| 51012 | C01 | 55026 | 9096   | TBX18    | 0.1267 | 1.3388 |
| 11048 | G04 | 539   | 7494   | XBP1     | 0.1268 | 1.3389 |
| 31044 | H09 | 462   | 6648   | SOD2     | 0.1268 | 1.3391 |
| 31028 | B10 | 14167 | 2893   | GRIA4    | 0.1269 | 1.3394 |
| 11008 | A08 | 6374  | 822    | CAPG     | 0.1270 | 1.3398 |
| 31004 | G03 | 10772 | 79632  | FAM184A  | 0.1273 | 1.3405 |
| 11010 | E06 | 571   | 5265   | SERPINA1 | 0.1273 | 1.3406 |
| 51012 | H02 | 54386 | 92935  | MARS2    | 0.1273 | 1.3406 |
| 11052 | E05 | 2750  | 23788  | MTCH2    | 0.1274 | 1.3408 |
| 11019 | G06 | 7576  | 51329  | ARL6IP4  | 0.1274 | 1.3409 |
| 31043 | H09 | 7362  | 7520   | XRCC5    | 0.1274 | 1.3410 |
| 31015 | B02 | 12569 | 6866   | TAC3     | 0.1275 | 1.3411 |
| 51004 | A04 | 52979 | 84709  | C4orf49  | 0.1275 | 1.3411 |
| 51021 | E04 | 13942 | 3037   | HAS2     | 0.1275 | 1.3413 |
| 11007 | H09 | 3268  | 4968   | OGG1     | 0.1277 | 1.3419 |
| 11050 | F09 | 345   | 84135  | UTP15    | 0.1278 | 1.3421 |
| 11014 | C08 | 573   | 29911  | HOOK2    | 0.1279 | 1.3423 |
| 51032 | F05 | 55660 | 144347 | FAM101A  | 0.1279 | 1.3425 |
| 11083 | A12 | 4757  | 10567  | RABAC1   | 0.1280 | 1.3429 |
| 11048 | E10 | 476   | 669    | BPGM     | 0.1282 | 1.3432 |
| 11081 | C04 | 2551  | NA     | NA       | 0.1282 | 1.3433 |
| 51025 | E01 | 56889 | 57188  | ADAMTSL3 | 0.1282 | 1.3434 |
| 11087 | A12 | 1682  | 5747   | PTK2     | 0.1283 | 1.3436 |
| 51009 | E04 | 55076 | 285331 | CCDC66   | 0.1283 | 1.3436 |
| 11030 | B01 | 1019  | 256691 | MAMDC2   | 0.1283 | 1.3437 |
| 31040 | H01 | 2102  | 130162 | C2orf63  | 0.1284 | 1.3439 |
| 11053 | G11 | 4622  | 7126   | TNFAIP1  | 0.1284 | 1.3440 |
| 11014 | B09 | 997   | 79671  | NLRX1    | 0.1284 | 1.3441 |
| 11004 | H01 | 5578  | 7980   | TFPI2    | 0.1285 | 1.3443 |
| 11025 | G09 | 2167  | 220042 | C11orf82 | 0.1286 | 1.3446 |
| 11051 | E04 | 487   | 54923  | LIME1    | 0.1286 | 1.3447 |
| 51022 | D07 | 56668 | 167465 | ZNF366   | 0.1288 | 1.3452 |
| 11010 | C02 | 5315  | 84970  | C1orf94  | 0.1288 | 1.3453 |
| 11007 | G10 | 4420  | 84726  | BAT2L    | 0.1288 | 1.3454 |
| 51022 | F12 | 56175 | 10460  | TACC3    | 0.1289 | 1.3455 |
| 31011 | C05 | 12072 | 23363  | OBSL1    | 0.1289 | 1.3456 |
| 11011 | H10 | 8406  | 1369   | CPN1     | 0.1289 | 1.3456 |
| 11067 | B03 | 6563  | 7454   | WAS      | 0.1292 | 1.3463 |
| 11019 | B02 | 6319  | 51019  | CCDC53   | 0.1292 | 1.3464 |
| 11069 | H02 | 10001 | 3652   | IPP      | 0.1293 | 1.3468 |
| 51015 | F08 | 52815 | 282808 | RAB40AL  | 0.1294 | 1.3471 |

|       |     |       |        |           |        |        |
|-------|-----|-------|--------|-----------|--------|--------|
| 11041 | H07 | 3335  | 55766  | H2AFJ     | 0.1295 | 1.3474 |
| 11041 | C11 | 5593  | 6374   | CXCL5     | 0.1295 | 1.3475 |
| 11062 | A08 | 9208  | 25827  | FBXL2     | 0.1297 | 1.3481 |
| 11025 | D04 | 1431  | 22911  | WDR47     | 0.1298 | 1.3484 |
| 11022 | A06 | 7348  | 6617   | SNAPC1    | 0.1299 | 1.3486 |
| 11043 | B08 | 4781  | 527    | ATP6V0C   | 0.1299 | 1.3486 |
| 11069 | A12 | 9229  | 2712   | GK2       | 0.1300 | 1.3489 |
| 31017 | E12 | 12945 | 121504 | HIST4H4   | 0.1300 | 1.3490 |
| 51032 | A02 | 56901 | 285141 | LOC285141 | 0.1301 | 1.3491 |
| 51017 | F04 | 56615 | 1178   | CLC       | 0.1301 | 1.3492 |
| 11057 | C10 | 494   | 25987  | TSKU      | 0.1301 | 1.3493 |
| 11011 | E08 | 3488  | 2665   | GDI2      | 0.1305 | 1.3505 |
| 11064 | A05 | 6916  | 7132   | TNFRSF1A  | 0.1306 | 1.3508 |
| 31037 | G04 | 12969 | 127255 | LRRIQ3    | 0.1307 | 1.3512 |
| 11068 | C05 | 7848  | 55789  | DEPDC1B   | 0.1307 | 1.3513 |
| 11057 | B07 | 2217  | 90550  | CCDC109A  | 0.1307 | 1.3513 |
| 51031 | B07 | 56848 | 84698  | CAPS2     | 0.1308 | 1.3513 |
| 31023 | D08 | 13612 | 4105   | MAGEA6    | 0.1308 | 1.3514 |
| 11010 | E02 | 3824  | 548596 | CKMT1A    | 0.1311 | 1.3524 |
| 31033 | C10 | 14837 | 90070  | LACRT     | 0.1313 | 1.3529 |
| 11076 | B09 | 4252  | 5660   | PSAP      | 0.1314 | 1.3534 |
| 11010 | A07 | 3108  | 5054   | SERPINE1  | 0.1314 | 1.3534 |
| 51013 | D01 | 54753 | 137209 | ZNF572    | 0.1315 | 1.3535 |
| 11041 | G09 | 6491  | 10923  | SUB1      | 0.1315 | 1.3536 |
| 11035 | H06 | 3987  | 1798   | DPAGT1    | 0.1316 | 1.3539 |
| 11084 | C06 | 2294  | 92715  | WDR85     | 0.1317 | 1.3543 |
| 11050 | F06 | 8634  | 10914  | PAPOLA    | 0.1320 | 1.3550 |
| 11065 | H01 | 9326  | 90527  | DUOXA1    | 0.1320 | 1.3551 |
| 11062 | A04 | 4883  | 80262  | C16orf70  | 0.1320 | 1.3551 |
| 51024 | C06 | 55140 | 283316 | CD163L1   | 0.1320 | 1.3552 |
| 51015 | E07 | 52969 | 7705   | ZNF146    | 0.1320 | 1.3553 |
| 11011 | A01 | 6762  | 86     | ACTL6A    | 0.1320 | 1.3553 |
| 11019 | E01 | 7111  | 4610   | MYCL1     | 0.1322 | 1.3560 |
| 11054 | B02 | 2092  | 4800   | NFYA      | 0.1323 | 1.3560 |
| 51022 | C07 | 55861 | 6197   | RPS6KA3   | 0.1323 | 1.3563 |
| 31008 | B09 | 11576 | 120534 | C11orf46  | 0.1324 | 1.3565 |
| 31015 | D01 | 12496 | 51186  | WBP5      | 0.1325 | 1.3569 |
| 11026 | F06 | 9626  | 84897  | TBRG1     | 0.1327 | 1.3573 |
| 51016 | F02 | 54907 | 255220 | TXNDC8    | 0.1327 | 1.3574 |
| 11046 | B05 | 1752  | 80273  | GRPEL1    | 0.1327 | 1.3574 |
| 11054 | H06 | 5853  | 54850  | FBXL12    | 0.1327 | 1.3574 |
| 11065 | F07 | 7593  | 2624   | GATA2     | 0.1328 | 1.3578 |
| 11056 | D06 | 907   | 27229  | TUBGCP4   | 0.1329 | 1.3580 |
| 31043 | G04 | 6175  | 9212   | AURKB     | 0.1330 | 1.3582 |

|       |     |       |        |           |        |        |
|-------|-----|-------|--------|-----------|--------|--------|
| 31022 | G07 | 13408 | 51537  | MTP18     | 0.1330 | 1.3584 |
| 11070 | E02 | 9420  | 57096  | RPGRIP1   | 0.1331 | 1.3586 |
| 11029 | D03 | 6079  | 3148   | HMGB2     | 0.1332 | 1.3588 |
| 11032 | A01 | 9951  | 22829  | NLGN4Y    | 0.1332 | 1.3589 |
| 11021 | G06 | 3554  | 78992  | YIPF2     | 0.1333 | 1.3591 |
| 51009 | E07 | 52688 | 55088  | C10orf118 | 0.1333 | 1.3591 |
| 31011 | H01 | 11511 | 11231  | SEC63     | 0.1333 | 1.3593 |
| 11064 | A08 | 7191  | 159    | ADSS      | 0.1335 | 1.3600 |
| 11035 | F04 | 1573  | 220136 | CCDC11    | 0.1336 | 1.3601 |
| 11014 | H08 | 775   | 9569   | GTF2IRD1  | 0.1336 | 1.3602 |
| 11007 | D10 | 1941  | 84248  | FYTTD1    | 0.1337 | 1.3604 |
| 31030 | C08 | 14448 | 54867  | TMEM214   | 0.1337 | 1.3604 |
| 31001 | H03 | 10604 | 126299 | ZNF428    | 0.1338 | 1.3607 |
| 51022 | B12 | 56379 | 144165 | PRICKLE1  | 0.1338 | 1.3608 |
| 31030 | G08 | 14446 | 84542  | KIAA1841  | 0.1338 | 1.3610 |
| 51014 | B07 | 52982 | 54811  | ZNF562    | 0.1339 | 1.3612 |
| 51026 | E04 | 55687 | 132949 | AASDH     | 0.1340 | 1.3613 |
| 51002 | D06 | 52597 | 347148 | QRFP      | 0.1340 | 1.3614 |
| 11060 | H03 | 4273  | 51138  | COPS4     | 0.1340 | 1.3616 |
| 31003 | G09 | 10726 | 23028  | KDM1A     | 0.1341 | 1.3616 |
| 11006 | G11 | 8521  | 744    | MPPED2    | 0.1341 | 1.3619 |
| 11032 | G04 | 9239  | 26526  | TSPAN16   | 0.1342 | 1.3620 |
| 31044 | G10 | 485   | 91574  | C12orf65  | 0.1343 | 1.3623 |
| 31045 | C07 | 9821  | 883    | CCBL1     | 0.1343 | 1.3624 |
| 11076 | E11 | 835   | 5096   | PCCB      | 0.1343 | 1.3624 |
| 31029 | E09 | 14361 | 728798 | FRMPD2L1  | 0.1344 | 1.3628 |
| 51027 | A09 | 56304 | 84501  | SPIRE2    | 0.1348 | 1.3638 |
| 31045 | C09 | 7475  | 55825  | PECR      | 0.1348 | 1.3640 |
| 11010 | E08 | 303   | 91137  | SLC25A46  | 0.1348 | 1.3640 |
| 11081 | H01 | 8749  | 84826  | SFT2D3    | 0.1348 | 1.3641 |
| 11026 | H07 | 8808  | 83451  | ABHD11    | 0.1348 | 1.3641 |
| 31029 | F08 | 14395 | 6834   | SURF1     | 0.1349 | 1.3642 |
| 31013 | E04 | 12225 | 55334  | SLC39A9   | 0.1349 | 1.3642 |
| 51016 | E01 | 55070 | 80035  | C15orf28  | 0.1349 | 1.3642 |
| 11064 | A06 | 3800  | 2052   | EPHX1     | 0.1349 | 1.3642 |
| 51032 | A06 | 53352 | 79986  | ZNF702P   | 0.1349 | 1.3644 |
| 11026 | A05 | 8640  | 64062  | RBM26     | 0.1349 | 1.3644 |
| 31002 | C07 | 10316 | 4117   | MAK       | 0.1351 | 1.3649 |
| 11034 | C03 | 6766  | 79080  | CCDC86    | 0.1351 | 1.3650 |
| 11067 | B04 | 7804  | 816    | CAMK2B    | 0.1352 | 1.3652 |
| 11085 | H10 | 4894  | 79930  | DOK3      | 0.1352 | 1.3653 |
| 11041 | C05 | 8766  | 145447 | ABHD12B   | 0.1354 | 1.3658 |
| 11013 | E03 | 6599  | 8031   | NCOA4     | 0.1354 | 1.3659 |
| 51018 | A05 | 56537 | 1207   | CLNS1A    | 0.1354 | 1.3660 |

|       |     |       |        |           |        |        |
|-------|-----|-------|--------|-----------|--------|--------|
| 11025 | A07 | 4484  | 9156   | EXO1      | 0.1355 | 1.3662 |
| 11020 | H10 | 5796  | 10935  | PRDX3     | 0.1358 | 1.3670 |
| 11010 | E01 | 119   | 811    | CALR      | 0.1359 | 1.3675 |
| 11002 | D01 | 10097 | 254228 | FAM26E    | 0.1360 | 1.3676 |
| 31022 | A10 | 13372 | 79679  | VTCN1     | 0.1360 | 1.3676 |
| 31017 | G10 | 12954 | 152007 | GLIPR2    | 0.1361 | 1.3682 |
| 31020 | E05 | 13057 | 6955   | TRA@      | 0.1361 | 1.3682 |
| 11018 | D06 | 9068  | 29066  | ZC3H7A    | 0.1362 | 1.3683 |
| 51022 | G09 | 56674 | 139411 | PTCHD1    | 0.1363 | 1.3687 |
| 31012 | E03 | 12362 | 7905   | REEP5     | 0.1364 | 1.3690 |
| 11062 | A10 | 2373  | 55032  | SLC35A5   | 0.1366 | 1.3695 |
| 11032 | F08 | 9547  | 10016  | PDCD6     | 0.1366 | 1.3697 |
| 51021 | F09 | 56630 | 7748   | ZNF195    | 0.1367 | 1.3698 |
| 31026 | B05 | 13803 | 8820   | HESX1     | 0.1367 | 1.3700 |
| 31004 | B05 | 11137 | 6415   | SEPW1     | 0.1367 | 1.3700 |
| 11046 | H02 | 5046  | 4835   | NQO2      | 0.1368 | 1.3704 |
| 11010 | B08 | 301   | 5165   | PDK3      | 0.1370 | 1.3707 |
| 11074 | G08 | 2153  | 83604  | TMEM47    | 0.1370 | 1.3708 |
| 31015 | F11 | 12554 | 712    | C1QA      | 0.1370 | 1.3710 |
| 11034 | F07 | 3707  | 1999   | ELF3      | 0.1371 | 1.3711 |
| 51023 | A10 | 54623 | 23214  | XPO6      | 0.1371 | 1.3711 |
| 11051 | E11 | 1197  | 4340   | MOG       | 0.1371 | 1.3713 |
| 31009 | E04 | 11526 | 55314  | TMEM144   | 0.1372 | 1.3717 |
| 11060 | E07 | 6977  | 25937  | WWTR1     | 0.1374 | 1.3720 |
| 11046 | H05 | 3838  | 5050   | PAFAH1B3  | 0.1374 | 1.3722 |
| 51015 | B07 | 53100 | 284837 | LOC284837 | 0.1376 | 1.3728 |
| 31010 | F12 | 11777 | 7767   | ZNF224    | 0.1376 | 1.3728 |
| 51025 | E07 | 53189 | 493    | ATP2B4    | 0.1377 | 1.3729 |
| 31045 | G05 | 9836  | 375593 | TRIM73    | 0.1378 | 1.3735 |
| 31015 | E01 | 12709 | 148046 | C19orf23  | 0.1380 | 1.3742 |
| 51014 | D09 | 52794 | 348094 | ANKDD1A   | 0.1381 | 1.3743 |
| 51004 | G06 | 54389 | 160364 | CLEC12A   | 0.1381 | 1.3743 |
| 31037 | E10 | 14181 | 27291  | C10orf28  | 0.1382 | 1.3747 |
| 11010 | A06 | 3235  | 3983   | ABLIM1    | 0.1384 | 1.3753 |
| 31029 | G08 | 14372 | 126364 | LRRC25    | 0.1384 | 1.3754 |
| 31020 | B01 | 13245 | 3123   | HLA-DRB1  | 0.1388 | 1.3765 |
| 11013 | A11 | 8294  | 84888  | SPPL2A    | 0.1388 | 1.3767 |
| 11054 | H04 | 61    | 1994   | ELAVL1    | 0.1389 | 1.3768 |
| 11058 | F02 | 2830  | 92342  | C1orf156  | 0.1390 | 1.3772 |
| 11043 | F02 | 6128  | 25941  | C18orf10  | 0.1391 | 1.3774 |
| 11011 | G06 | 9111  | 84720  | PIGO      | 0.1391 | 1.3776 |
| 31013 | B10 | 12131 | 81502  | HM13      | 0.1391 | 1.3777 |
| 31033 | A11 | 14948 | 6138   | RPL15     | 0.1392 | 1.3778 |
| 11005 | H04 | 5509  | 54517  | PUS7      | 0.1394 | 1.3784 |

|       |     |       |        |          |        |        |
|-------|-----|-------|--------|----------|--------|--------|
| 11040 | G08 | 5658  | 9341   | VAMP3    | 0.1395 | 1.3788 |
| 51030 | H05 | 55479 | 51296  | SLC15A3  | 0.1395 | 1.3789 |
| 11073 | B12 | 4644  | 52     | ACPI     | 0.1396 | 1.3790 |
| 51014 | B08 | 52702 | 54346  | UNC93A   | 0.1396 | 1.3791 |
| 11034 | C01 | 1642  | 3769   | KCNJ13   | 0.1396 | 1.3791 |
| 11081 | G02 | 1091  | 57189  | KIAA1147 | 0.1396 | 1.3792 |
| 11032 | A12 | 2623  | 81034  | SLC25A32 | 0.1397 | 1.3793 |
| 11003 | F12 | 8760  | 51530  | ZC3HC1   | 0.1398 | 1.3798 |
| 11008 | G08 | 6231  | 9672   | SDC3     | 0.1399 | 1.3801 |
| 31022 | D01 | 13339 | 57116  | ZNF695   | 0.1401 | 1.3806 |
| 31032 | G05 | 14555 | 79864  | C11orf63 | 0.1401 | 1.3807 |
| 51020 | G02 | 56651 | 4063   | LY9      | 0.1401 | 1.3808 |
| 11069 | C01 | 6539  | 29781  | NCAPH2   | 0.1401 | 1.3808 |
| 11046 | A06 | 2632  | 3543   | IGLL1    | 0.1401 | 1.3808 |
| 11074 | C07 | 1606  | 143241 | DYDC1    | 0.1402 | 1.3810 |
| 51009 | A11 | 53068 | 50617  | ATP6V0A4 | 0.1402 | 1.3811 |
| 31026 | A04 | 13799 | 8995   | TNFSF18  | 0.1402 | 1.3811 |
| 11048 | G09 | 488   | 8269   | TMEM187  | 0.1403 | 1.3814 |
| 11062 | B12 | 2050  | 5609   | MAP2K7   | 0.1403 | 1.3814 |
| 31009 | C01 | 11711 | 84549  | MAK16    | 0.1404 | 1.3816 |
| 31001 | C07 | 10697 | 90865  | IL33     | 0.1404 | 1.3817 |
| 11057 | C08 | 5636  | 51626  | DYNC2LI1 | 0.1404 | 1.3818 |
| 11064 | F11 | 8421  | 5407   | PNLIPRP1 | 0.1405 | 1.3818 |
| 11005 | H11 | 2085  | 84688  | C9orf24  | 0.1406 | 1.3823 |
| 31012 | C09 | 12137 | 8601   | RGS20    | 0.1407 | 1.3826 |
| 51014 | D07 | 52744 | 127833 | SYT2     | 0.1407 | 1.3827 |
| 51031 | A10 | 56499 | 1446   | CSN1S1   | 0.1407 | 1.3827 |
| 11027 | C06 | 3534  | 2876   | GPX1     | 0.1408 | 1.3830 |
| 31022 | E08 | 13319 | 820    | CAMP     | 0.1408 | 1.3831 |
| 11045 | H02 | 416   | 23270  | TSPYL4   | 0.1409 | 1.3831 |
| 11019 | D06 | 7937  | 8934   | RAB7L1   | 0.1409 | 1.3832 |
| 11050 | A10 | 4879  | 26577  | PCOLCE2  | 0.1410 | 1.3834 |
| 11058 | H05 | 8226  | 7913   | DEK      | 0.1410 | 1.3835 |
| 31028 | E10 | 14161 | 375686 | SPATC1   | 0.1411 | 1.3838 |
| 11028 | F06 | 3495  | 54499  | TMCO1    | 0.1411 | 1.3839 |
| 31011 | D05 | 12066 | NA     | NA       | 0.1411 | 1.3840 |
| 31031 | D10 | 14601 | 9293   | GPR52    | 0.1412 | 1.3842 |
| 51022 | E01 | 56382 | 8554   | PIAS1    | 0.1412 | 1.3843 |
| 31026 | A09 | 13815 | 9622   | KLK4     | 0.1413 | 1.3845 |
| 51016 | G01 | 54093 | 117285 | DEFB118  | 0.1415 | 1.3850 |
| 11070 | H03 | 315   | 9823   | ARMCX2   | 0.1415 | 1.3851 |
| 51034 | H10 | 54149 | 126326 | GIPC3    | 0.1415 | 1.3851 |
| 11019 | F07 | 6379  | 51642  | MRPL48   | 0.1415 | 1.3851 |
| 51010 | C07 | 54632 | 1183   | CLCN4    | 0.1416 | 1.3854 |



|       |     |       |        |           |        |        |
|-------|-----|-------|--------|-----------|--------|--------|
| 11042 | H02 | 7334  | 54458  | PRR13     | 0.1417 | 1.3859 |
| 31028 | E09 | 14173 | 1462   | VCAN      | 0.1418 | 1.3860 |
| 11045 | A12 | 6425  | 29099  | COMMD9    | 0.1418 | 1.3861 |
| 11030 | H07 | 7487  | 3087   | HHEX      | 0.1419 | 1.3863 |
| 51024 | C09 | 55151 | 23198  | PSME4     | 0.1419 | 1.3863 |
| 51013 | F07 | 54817 | 63951  | DMRTA1    | 0.1420 | 1.3868 |
| 11043 | E03 | 6342  | 29098  | RANGRF    | 0.1421 | 1.3872 |
| 31003 | B12 | 10633 | 57653  | KIAA1529  | 0.1422 | 1.3875 |
| 11026 | B05 | 724   | 10169  | SERF2     | 0.1423 | 1.3876 |
| 11073 | F05 | 4513  | 4718   | NDUFC2    | 0.1423 | 1.3876 |
| 11081 | B09 | 9353  | 54918  | CMTM6     | 0.1425 | 1.3884 |
| 11036 | H02 | 9866  | 51364  | ZMYND10   | 0.1426 | 1.3886 |
| 11047 | C07 | 5012  | 56675  | NRIP3     | 0.1426 | 1.3886 |
| 11041 | A04 | 5932  | 2079   | ERH       | 0.1426 | 1.3888 |
| 11052 | G04 | 1778  | 256979 | SUN3      | 0.1427 | 1.3890 |
| 51016 | B08 | 56614 | 54544  | CRCT1     | 0.1427 | 1.3891 |
| 31015 | F09 | 12598 | 26231  | LRRC29    | 0.1428 | 1.3895 |
| 51012 | A06 | 53738 | 285093 | C2orf85   | 0.1430 | 1.3900 |
| 31001 | D07 | 10644 | 30010  | NXPH1     | 0.1433 | 1.3911 |
| 51034 | C01 | 53614 | 199699 | DAND5     | 0.1436 | 1.3919 |
| 11049 | G07 | 6877  | 54902  | TTC19     | 0.1437 | 1.3922 |
| 31012 | B08 | 11832 | 8915   | BCL10     | 0.1438 | 1.3925 |
| 11059 | H02 | 2595  | 7040   | TGFB1     | 0.1440 | 1.3931 |
| 11065 | C04 | 1716  | 51175  | TUBE1     | 0.1443 | 1.3942 |
| 51014 | A07 | 52802 | 200894 | ARL13B    | 0.1444 | 1.3945 |
| 11072 | C12 | 143   | 2146   | EZH2      | 0.1447 | 1.3955 |
| 31032 | A01 | 14490 | 55915  | LANCL2    | 0.1448 | 1.3958 |
| 51035 | B05 | 53721 | 2693   | GHSR      | 0.1449 | 1.3961 |
| 31015 | D09 | 12441 | 63932  | CXorf56   | 0.1449 | 1.3962 |
| 11055 | G10 | 4123  | 5329   | PLAUR     | 0.1450 | 1.3962 |
| 11027 | G05 | 8854  | 3609   | ILF3      | 0.1450 | 1.3963 |
| 51001 | F09 | 52913 | 57701  | NCKAP5L   | 0.1452 | 1.3969 |
| 51032 | D04 | 56902 | 642204 | LOC642204 | 0.1452 | 1.3971 |
| 11027 | G06 | 9189  | 6512   | SLC1A7    | 0.1453 | 1.3972 |
| 31026 | B03 | 13861 | 2122   | MECOM     | 0.1453 | 1.3973 |
| 11011 | C01 | 250   | 1937   | EEF1G     | 0.1455 | 1.3978 |
| 11008 | A07 | 153   | 79885  | HDAC11    | 0.1455 | 1.3979 |
| 11037 | D09 | 3525  | 2519   | FUCA2     | 0.1455 | 1.3980 |
| 11065 | D03 | 2704  | 5468   | PPARG     | 0.1455 | 1.3981 |
| 11010 | B06 | 5872  | 56944  | OLFML3    | 0.1456 | 1.3982 |
| 31008 | E06 | 11828 | 168451 | THAP5     | 0.1457 | 1.3986 |
| 11043 | G03 | 8543  | 169693 | C9orf71   | 0.1457 | 1.3987 |
| 51010 | F11 | 54116 | 91828  | C14orf73  | 0.1458 | 1.3990 |
| 11012 | G08 | 1768  | 55329  | MNS1      | 0.1461 | 1.3999 |

|       |     |       |        |           |        |        |
|-------|-----|-------|--------|-----------|--------|--------|
| 51012 | B05 | 53014 | 163049 | ZNF791    | 0.1461 | 1.4000 |
| 11068 | F01 | 9726  | 22845  | DOLK      | 0.1462 | 1.4002 |
| 11027 | F04 | 2618  | 5202   | PFDN2     | 0.1463 | 1.4007 |
| 11054 | G11 | 3678  | 55692  | LUC7L     | 0.1465 | 1.4011 |
| 11007 | H08 | 5843  | 79780  | CCDC82    | 0.1466 | 1.4014 |
| 31008 | H09 | 11623 | 25961  | NUDT13    | 0.1466 | 1.4015 |
| 31006 | G04 | 11264 | 9525   | VPS4B     | 0.1467 | 1.4017 |
| 31044 | H11 | 884   | 3111   | HLA-DOA   | 0.1467 | 1.4019 |
| 31045 | A05 | 9632  | 6583   | SLC22A4   | 0.1469 | 1.4025 |
| 11048 | G06 | 5451  | 3817   | KLK2      | 0.1472 | 1.4034 |
| 11040 | D08 | 6582  | 56998  | CTNNBIP1  | 0.1472 | 1.4034 |
| 51004 | C11 | 53209 | 114899 | C1QTNF3   | 0.1473 | 1.4039 |
| 51014 | B01 | 53662 | 359710 | C20orf185 | 0.1474 | 1.4040 |
| 31008 | G10 | 11335 | 57408  | LRTM1     | 0.1474 | 1.4041 |
| 11034 | D07 | 6039  | 55520  | ELAC1     | 0.1475 | 1.4044 |
| 11010 | H02 | 7988  | 2149   | F2R       | 0.1475 | 1.4045 |
| 11068 | A03 | 9905  | 11284  | PNKP      | 0.1476 | 1.4048 |
| 11011 | H11 | 3595  | 27429  | HTRA2     | 0.1476 | 1.4049 |
| 11008 | B10 | 2747  | 79607  | FAM118B   | 0.1477 | 1.4051 |
| 11054 | F08 | 8556  | 3257   | HPS1      | 0.1479 | 1.4058 |
| 51012 | H05 | 54522 | 221786 | FAM200A   | 0.1480 | 1.4060 |
| 51028 | F11 | 55547 | 129804 | FBLN7     | 0.1480 | 1.4061 |
| 11059 | D07 | 8075  | 93517  | SDR42E1   | 0.1481 | 1.4064 |
| 11067 | D10 | 9693  | 79960  | PHF17     | 0.1482 | 1.4067 |
| 11013 | F06 | 5308  | 2547   | XRCC6     | 0.1482 | 1.4068 |
| 31045 | C08 | 4317  | 83719  | YPEL3     | 0.1488 | 1.4086 |
| 11068 | A04 | 9552  | 79703  | C11orf80  | 0.1488 | 1.4088 |
| 31028 | C10 | 14140 | 55844  | PPP2R2D   | 0.1489 | 1.4089 |
| 11068 | A09 | 4928  | 6095   | RORA      | 0.1489 | 1.4090 |
| 11014 | A11 | 3912  | 7045   | TGFBI     | 0.1490 | 1.4091 |
| 11015 | H04 | 5765  | 199777 | ZNF626    | 0.1490 | 1.4091 |
| 11030 | D08 | 3676  | 58528  | RRAGD     | 0.1491 | 1.4095 |
| 11035 | B04 | 2126  | 2553   | GABPB1    | 0.1491 | 1.4096 |
| 51018 | C09 | 56281 | 283576 | ZDHHC22   | 0.1491 | 1.4097 |
| 31004 | B02 | 10544 | 55252  | ASXL2     | 0.1492 | 1.4098 |
| 11064 | D01 | 2486  | 8503   | PIK3R3    | 0.1493 | 1.4102 |
| 11069 | H06 | 9226  | 161931 | ADAD2     | 0.1494 | 1.4107 |
| 11052 | H08 | 9131  | 114780 | PKD1L2    | 0.1496 | 1.4112 |
| 11081 | E08 | 9879  | 83786  | FRMD8     | 0.1499 | 1.4123 |
| 51022 | G04 | 56060 | 7768   | ZNF225    | 0.1501 | 1.4128 |
| 11032 | C02 | 9645  | 2272   | FHIT      | 0.1503 | 1.4135 |
| 11014 | B05 | 6723  | 79611  | ACSS3     | 0.1503 | 1.4136 |
| 11030 | D09 | 3681  | 4729   | NDUFV2    | 0.1504 | 1.4139 |
| 11011 | H05 | 309   | 29781  | NCAPH2    | 0.1506 | 1.4145 |

|       |     |       |        |          |        |        |
|-------|-----|-------|--------|----------|--------|--------|
| 11007 | A12 | 9649  | 256356 | GK5      | 0.1507 | 1.4149 |
| 11067 | F12 | 4516  | 64395  | GMCL1    | 0.1512 | 1.4165 |
| 31014 | D05 | 12359 | 9054   | NFS1     | 0.1512 | 1.4166 |
| 11010 | E05 | 6050  | 51001  | MTERFD1  | 0.1513 | 1.4167 |
| 51027 | C07 | 53353 | 200030 | NBPF11   | 0.1513 | 1.4169 |
| 11032 | F03 | 9312  | 2583   | B4GALNT1 | 0.1514 | 1.4172 |
| 31010 | E02 | 11733 | 51473  | DCDC2    | 0.1515 | 1.4173 |
| 31045 | D09 | 6752  | 51523  | CXXC5    | 0.1516 | 1.4178 |
| 11010 | B07 | 5409  | 5104   | SERPINA5 | 0.1516 | 1.4179 |
| 51009 | G02 | 52728 | 83416  | FCRL5    | 0.1519 | 1.4186 |
| 11027 | E07 | 7941  | 10577  | NPC2     | 0.1519 | 1.4188 |
| 11025 | E10 | 1909  | 1315   | COPB1    | 0.1521 | 1.4195 |
| 11019 | E11 | 6650  | 29091  | STXBP6   | 0.1523 | 1.4199 |
| 31003 | E05 | 10303 | 23560  | GTPBP4   | 0.1523 | 1.4200 |
| 51022 | G02 | 56648 | 3833   | KIFC1    | 0.1524 | 1.4205 |
| 31013 | F09 | 12146 | 113251 | LARP4    | 0.1526 | 1.4210 |
| 31025 | A11 | 14080 | 6369   | CCL24    | 0.1526 | 1.4211 |
| 11014 | E03 | 4873  | 25904  | CNOT10   | 0.1527 | 1.4212 |
| 11020 | F05 | 5813  | 1155   | TBCB     | 0.1527 | 1.4212 |
| 11078 | B05 | 1452  | 205564 | SENP5    | 0.1527 | 1.4213 |
| 31018 | D03 | 12941 | 79630  | C1orf54  | 0.1528 | 1.4217 |
| 11055 | A12 | 3097  | 57333  | RCN3     | 0.1530 | 1.4222 |
| 11011 | B11 | 5446  | 2266   | FGG      | 0.1530 | 1.4225 |
| 11034 | B02 | 3283  | 79000  | C1orf135 | 0.1532 | 1.4229 |
| 31008 | A01 | 11684 | 375248 | ANKRD36  | 0.1533 | 1.4232 |
| 11060 | D07 | 950   | 7978   | MTERF    | 0.1534 | 1.4235 |
| 51011 | D05 | 52863 | 7582   | ZNF33B   | 0.1534 | 1.4237 |
| 11010 | E09 | 7441  | 29890  | RBM15B   | 0.1535 | 1.4241 |
| 11025 | A09 | 9442  | 54882  | ANKHD1   | 0.1536 | 1.4242 |
| 11027 | C11 | 2135  | 284040 | CDRT4    | 0.1536 | 1.4243 |
| 11034 | F05 | 1766  | 5481   | PPID     | 0.1536 | 1.4244 |
| 11011 | G07 | 780   | 151011 | SEPT10   | 0.1537 | 1.4247 |
| 31025 | B03 | 13458 | 1653   | DDX1     | 0.1537 | 1.4247 |
| 11065 | C11 | 844   | 10367  | CBARA1   | 0.1538 | 1.4251 |
| 51034 | C02 | 53986 | 3467   | IFNW1    | 0.1542 | 1.4263 |
| 51034 | H02 | 54297 | 282618 | IL29     | 0.1543 | 1.4266 |
| 11011 | A02 | 7109  | 23157  | SEPT6    | 0.1543 | 1.4266 |
| 31031 | F09 | 14483 | 57157  | PHTF2    | 0.1544 | 1.4269 |
| 51024 | F08 | 56293 | 1301   | COL11A1  | 0.1546 | 1.4275 |
| 11010 | F02 | 3778  | 28969  | BZW2     | 0.1548 | 1.4283 |
| 11071 | E07 | 7461  | 10767  | HBS1L    | 0.1549 | 1.4286 |
| 11052 | C08 | 8660  | 26084  | SGEF     | 0.1549 | 1.4287 |
| 31022 | H04 | 13575 | 27004  | TCL6     | 0.1550 | 1.4287 |
| 31008 | E09 | 11815 | 354    | KLK3     | 0.1550 | 1.4288 |

|       |     |       |        |           |        |        |
|-------|-----|-------|--------|-----------|--------|--------|
| 31018 | E12 | 12896 | 117247 | SLC16A10  | 0.1550 | 1.4290 |
| 11027 | D09 | 6069  | 4069   | LYZ       | 0.1552 | 1.4294 |
| 51018 | H02 | 56003 | 54848  | ARHGEF38  | 0.1554 | 1.4303 |
| 31043 | D06 | 6545  | 27245  | AHDC1     | 0.1555 | 1.4304 |
| 11009 | C01 | 5194  | 84993  | UBL7      | 0.1556 | 1.4307 |
| 11050 | H07 | 4528  | 6809   | STX3      | 0.1556 | 1.4310 |
| 51028 | A07 | 53182 | 57396  | CLK4      | 0.1559 | 1.4319 |
| 31020 | C06 | 13204 | 51170  | HSD17B11  | 0.1559 | 1.4320 |
| 51023 | E03 | 56231 | 23762  | OSBP2     | 0.1559 | 1.4320 |
| 51025 | E08 | 53172 | 23613  | ZMYND8    | 0.1561 | 1.4324 |
| 51011 | H10 | 55071 | 284071 | C17orf104 | 0.1562 | 1.4327 |
| 11008 | B05 | 187   | 3171   | FOXA3     | 0.1565 | 1.4339 |
| 11010 | H04 | 5187  | 3624   | INHBA     | 0.1567 | 1.4345 |
| 11035 | C12 | 3582  | 80723  | TMEM22    | 0.1568 | 1.4348 |
| 11055 | H11 | 1995  | 122011 | CSNK1A1L  | 0.1569 | 1.4353 |
| 11034 | F08 | 3286  | 2762   | GMDS      | 0.1570 | 1.4355 |
| 51020 | D06 | 56618 | 127602 | DNAH14    | 0.1572 | 1.4363 |
| 31044 | G09 | 631   | 51026  | GOLT1B    | 0.1574 | 1.4369 |
| 31016 | A12 | 12559 | 94240  | EPSTI1    | 0.1574 | 1.4369 |
| 31005 | C02 | 10942 | 255426 | RASGEF1C  | 0.1575 | 1.4372 |
| 11038 | D10 | 5625  | 27067  | STAU2     | 0.1576 | 1.4373 |
| 51032 | B12 | 56514 | 4250   | SCGB2A2   | 0.1576 | 1.4373 |
| 31024 | A10 | 13398 | 151230 | KLHL23    | 0.1576 | 1.4376 |
| 51010 | B04 | 52704 | 56131  | PCDHB4    | 0.1577 | 1.4378 |
| 11034 | H01 | 7432  | 5269   | SERPINB6  | 0.1577 | 1.4378 |
| 11014 | A08 | 210   | 5627   | PROS1     | 0.1581 | 1.4391 |
| 11076 | G06 | 1632  | 79648  | MCPH1     | 0.1582 | 1.4394 |
| 31002 | G08 | 10758 | 9388   | LIPG      | 0.1583 | 1.4397 |
| 51004 | G11 | 54843 | 6718   | AKR1D1    | 0.1583 | 1.4398 |
| 51024 | A06 | 54372 | 6249   | CLIP1     | 0.1583 | 1.4399 |
| 51028 | B04 | 56075 | 23326  | USP22     | 0.1583 | 1.4399 |
| 11044 | B09 | 2776  | 1635   | DCTD      | 0.1583 | 1.4399 |
| 11032 | B02 | 7691  | 10253  | SPRY2     | 0.1588 | 1.4416 |
| 11054 | A10 | 6225  | 51465  | UBE2J1    | 0.1589 | 1.4417 |
| 31015 | H02 | 12597 | 25798  | BRI3      | 0.1591 | 1.4425 |
| 31012 | D06 | 12156 | NA     | NA        | 0.1593 | 1.4430 |
| 11005 | G08 | 8324  | 56906  | THAP10    | 0.1593 | 1.4430 |
| 11041 | H06 | 9000  | 54583  | EGLN1     | 0.1593 | 1.4431 |
| 11027 | G09 | 284   | 57146  | TMEM159   | 0.1593 | 1.4432 |
| 11060 | A09 | 3481  | 9709   | HERPUD1   | 0.1594 | 1.4436 |
| 11015 | B04 | 5673  | 5350   | PLN       | 0.1599 | 1.4450 |
| 31044 | H03 | 4926  | 6474   | SHOX2     | 0.1599 | 1.4452 |
| 51034 | E11 | 54703 | 26539  | OR10H1    | 0.1599 | 1.4453 |
| 11057 | H11 | 491   | 64118  | DUS1L     | 0.1600 | 1.4454 |

|       |     |       |        |          |        |        |
|-------|-----|-------|--------|----------|--------|--------|
| 31041 | A12 | 4893  | 6745   | SSR1     | 0.1602 | 1.4460 |
| 11072 | B01 | 2313  | 1606   | DGKA     | 0.1605 | 1.4470 |
| 11026 | D11 | 2292  | 439933 | MGC42157 | 0.1607 | 1.4477 |
| 11062 | D04 | 9307  | 5170   | PDPK1    | 0.1612 | 1.4494 |
| 11069 | B09 | 9354  | 200958 | MUC20    | 0.1612 | 1.4495 |
| 11041 | A08 | 8673  | 1486   | CTBS     | 0.1613 | 1.4497 |
| 51033 | F08 | 54281 | 286006 | C7orf53  | 0.1614 | 1.4500 |
| 11014 | E05 | 194   | 2145   | EZH1     | 0.1614 | 1.4503 |
| 11057 | B08 | 8288  | 914    | CD2      | 0.1617 | 1.4512 |
| 11055 | G01 | 9544  | 79612  | NAA16    | 0.1617 | 1.4513 |
| 11061 | D10 | 4428  | 55501  | CHST12   | 0.1623 | 1.4532 |
| 11086 | E01 | 2262  | 255022 | CALHM1   | 0.1624 | 1.4536 |
| 11053 | F10 | 595   | 4072   | EPCAM    | 0.1626 | 1.4542 |
| 51016 | C03 | 54431 | 4707   | NDUFB1   | 0.1635 | 1.4570 |
| 51034 | F07 | 53536 | 9906   | SLC35E2  | 0.1636 | 1.4574 |
| 11042 | B11 | 8834  | 5889   | RAD51C   | 0.1642 | 1.4596 |
| 51011 | E04 | 53566 | 147686 | ZNF418   | 0.1646 | 1.4608 |
| 11019 | A04 | 7312  | 399    | RHOH     | 0.1650 | 1.4623 |
| 51008 | F08 | 55158 | 57529  | RGAG1    | 0.1651 | 1.4627 |
| 11050 | E06 | 1735  | 4507   | MTAP     | 0.1653 | 1.4631 |
| 11044 | G06 | 2635  | 80117  | ARL14    | 0.1654 | 1.4636 |
| 11034 | A07 | 1223  | 2781   | GNAZ     | 0.1654 | 1.4636 |
| 31005 | F08 | 11100 | 6477   | SIAH1    | 0.1654 | 1.4637 |
| 51014 | C11 | 52795 | 285242 | HTR3E    | 0.1660 | 1.4654 |
| 11027 | C07 | 2566  | 90411  | MCFD2    | 0.1660 | 1.4656 |
| 31022 | G04 | 13379 | 9349   | RPL23    | 0.1661 | 1.4658 |
| 11054 | H05 | 1131  | 134    | ADORA1   | 0.1662 | 1.4662 |
| 11069 | G10 | 7888  | 375133 | PI4KAP2  | 0.1663 | 1.4664 |
| 11081 | A12 | 1251  | 6691   | SPINK2   | 0.1665 | 1.4673 |
| 11065 | G10 | 1178  | 7766   | ZNF223   | 0.1667 | 1.4679 |
| 11025 | A05 | 9692  | 535    | ATP6V0A1 | 0.1671 | 1.4692 |
| 11041 | C07 | 7484  | 81853  | TMEM14B  | 0.1673 | 1.4699 |
| 11028 | B05 | 1425  | 116461 | TSEN15   | 0.1673 | 1.4700 |
| 11037 | C04 | 3636  | 55722  | CEP72    | 0.1675 | 1.4705 |
| 11029 | G05 | 804   | 2941   | GSTA4    | 0.1675 | 1.4706 |
| 31014 | H01 | 12224 | 28987  | NOB1     | 0.1677 | 1.4712 |
| 51015 | A05 | 52789 | 338398 | TAS2R60  | 0.1678 | 1.4718 |
| 51013 | H09 | 53921 | 55733  | HHAT     | 0.1678 | 1.4718 |
| 11063 | H06 | 7310  | 10924  | SMPDL3A  | 0.1681 | 1.4726 |
| 11068 | H07 | 7235  | 9197   | SLC33A1  | 0.1681 | 1.4726 |
| 31019 | E07 | 13203 | 3514   | IGKC     | 0.1681 | 1.4728 |
| 51021 | A01 | 56590 | 51182  | HSPA14   | 0.1682 | 1.4729 |
| 31004 | H08 | 11285 | 55022  | PID1     | 0.1682 | 1.4729 |
| 31045 | B09 | 3356  | 79041  | TMEM38A  | 0.1684 | 1.4738 |

|       |     |       |        |           |        |        |
|-------|-----|-------|--------|-----------|--------|--------|
| 11065 | D12 | 7584  | 51067  | YARS2     | 0.1684 | 1.4738 |
| 11064 | G06 | 5124  | 25813  | SAMM50    | 0.1686 | 1.4744 |
| 31033 | E02 | 14725 | 5792   | PTPRF     | 0.1691 | 1.4761 |
| 11037 | C08 | 6395  | 51135  | IRAK4     | 0.1692 | 1.4763 |
| 11057 | A08 | 10180 | 6483   | ST3GAL2   | 0.1692 | 1.4763 |
| 51010 | C03 | 54688 | 84873  | GPR128    | 0.1693 | 1.4768 |
| 11012 | A08 | 2995  | 2558   | GABRA5    | 0.1694 | 1.4769 |
| 51015 | F11 | 52838 | 8742   | TNFSF12   | 0.1694 | 1.4770 |
| 11018 | A09 | 7708  | 6147   | RPL23A    | 0.1697 | 1.4781 |
| 11062 | D01 | 4076  | 2717   | GLA       | 0.1697 | 1.4781 |
| 11020 | A07 | 7565  | 64100  | ELSPBP1   | 0.1705 | 1.4809 |
| 11019 | C12 | 7723  | 127396 | ZNF684    | 0.1707 | 1.4815 |
| 51016 | A09 | 55971 | 285733 | LOC285733 | 0.1707 | 1.4816 |
| 11050 | G02 | 222   | 219844 | HYLS1     | 0.1709 | 1.4821 |
| 11010 | E10 | 6211  | 570    | BAAT      | 0.1709 | 1.4822 |
| 11063 | A09 | 4923  | 10884  | MRPS30    | 0.1709 | 1.4823 |
| 51022 | B09 | 56177 | 10371  | SEMA3A    | 0.1709 | 1.4823 |
| 31023 | B01 | 13335 | 86614  | HSFY1     | 0.1712 | 1.4833 |
| 11034 | C05 | 6702  | 56945  | MRPS22    | 0.1715 | 1.4841 |
| 51027 | F05 | 56081 | 1617   | DAZ1      | 0.1716 | 1.4844 |
| 31007 | A03 | 11228 | 9213   | XPR1      | 0.1719 | 1.4857 |
| 31004 | H05 | 11289 | 27297  | CRCP      | 0.1720 | 1.4860 |
| 11067 | G09 | 4653  | 81556  | C15orf44  | 0.1722 | 1.4866 |
| 11064 | A07 | 8081  | 57707  | KIAA1609  | 0.1726 | 1.4879 |
| 31001 | H01 | 10450 | 317671 | RFESD     | 0.1727 | 1.4885 |
| 11032 | H06 | 1516  | 146894 | CD300LG   | 0.1728 | 1.4886 |
| 11054 | H10 | 6091  | 79037  | PVRIG     | 0.1728 | 1.4887 |
| 11034 | H03 | 6400  | 55785  | FGD6      | 0.1730 | 1.4895 |
| 11034 | H05 | 2572  | 7299   | TYR       | 0.1735 | 1.4909 |
| 11027 | B07 | 892   | 2286   | FKBP2     | 0.1735 | 1.4910 |
| 11088 | G09 | 2946  | 25821  | MTO1      | 0.1736 | 1.4914 |
| 31004 | D02 | 10280 | 9759   | HDAC4     | 0.1743 | 1.4937 |
| 31001 | C02 | 10289 | 55608  | ANKRD10   | 0.1745 | 1.4944 |
| 51029 | G07 | 55688 | 7482   | WNT2B     | 0.1746 | 1.4950 |
| 51009 | H06 | 54049 | 348654 | GEN1      | 0.1749 | 1.4959 |
| 11014 | A06 | 989   | 9513   | FXR2      | 0.1751 | 1.4967 |
| 11088 | E02 | 9801  | 55841  | WWC3      | 0.1756 | 1.4982 |
| 11011 | D01 | 6221  | 1487   | CTBP1     | 0.1756 | 1.4983 |
| 11067 | B08 | 9923  | 29785  | CYP2S1    | 0.1757 | 1.4985 |
| 11011 | G05 | 3150  | 1743   | DLST      | 0.1757 | 1.4987 |
| 11012 | B07 | 163   | 4090   | SMAD5     | 0.1758 | 1.4989 |
| 11034 | H06 | 3169  | 5710   | PSMD4     | 0.1764 | 1.5009 |
| 11034 | G08 | 1311  | 168433 | RNF133    | 0.1765 | 1.5013 |
| 51021 | D06 | 56602 | 54813  | KLHL28    | 0.1766 | 1.5016 |

|       |     |       |        |          |        |        |
|-------|-----|-------|--------|----------|--------|--------|
| 11060 | A01 | 2525  | 7108   | TM7SF2   | 0.1767 | 1.5019 |
| 11063 | G05 | 5074  | 26277  | TINF2    | 0.1767 | 1.5021 |
| 11073 | E05 | 3761  | 3399   | ID3      | 0.1773 | 1.5043 |
| 31003 | G03 | 10524 | 9236   | CCPG1    | 0.1776 | 1.5052 |
| 11026 | C07 | 9431  | 414927 | MGC34796 | 0.1782 | 1.5074 |
| 11081 | A07 | 3188  | 1350   | COX7C    | 0.1788 | 1.5092 |
| 11020 | E11 | 5696  | 51074  | APIP     | 0.1791 | 1.5103 |
| 31044 | C11 | 1644  | 23429  | RYBP     | 0.1797 | 1.5124 |
| 11067 | H11 | 7301  | 50945  | TBX22    | 0.1798 | 1.5130 |
| 11066 | A10 | 1396  | 221016 | CCDC7    | 0.1798 | 1.5130 |
| 11054 | F09 | 3915  | 27173  | SLC39A1  | 0.1799 | 1.5132 |
| 51029 | A08 | 53147 | 164045 | HFM1     | 0.1815 | 1.5188 |
| 51015 | D07 | 52805 | 285498 | RNF212   | 0.1816 | 1.5190 |
| 31008 | C06 | 11686 | 29990  | PILRB    | 0.1816 | 1.5192 |
| 51018 | F11 | 56754 | 137075 | CLDN23   | 0.1823 | 1.5217 |
| 31015 | G08 | 12578 | 92002  | FAM58A   | 0.1824 | 1.5218 |
| 11050 | D02 | 1647  | 81542  | TMX1     | 0.1827 | 1.5229 |
| 11043 | F05 | 5538  | 1070   | CETN3    | 0.1831 | 1.5243 |
| 51022 | H01 | 56165 | 4064   | CD180    | 0.1832 | 1.5246 |
| 31009 | G07 | 11722 | 54440  | SASH3    | 0.1833 | 1.5250 |
| 11034 | F11 | 8682  | 154865 | IQUB     | 0.1833 | 1.5252 |
| 11044 | A08 | 7395  | 2512   | FTL      | 0.1833 | 1.5252 |
| 11065 | F10 | 7188  | 6672   | SP100    | 0.1835 | 1.5259 |
| 11035 | E05 | 1199  | 163486 | DENND1B  | 0.1839 | 1.5271 |
| 11047 | E05 | 2422  | 134147 | CMBL     | 0.1839 | 1.5272 |
| 11041 | A05 | 5606  | 54205  | CYCS     | 0.1840 | 1.5275 |
| 31020 | G06 | 12924 | 549    | AUH      | 0.1850 | 1.5310 |
| 31028 | H06 | 14104 | 158219 | TTC39B   | 0.1856 | 1.5333 |
| 31044 | E06 | 3243  | 6950   | TCP1     | 0.1857 | 1.5336 |
| 11068 | A02 | 9710  | 1583   | CYP11A1  | 0.1863 | 1.5356 |
| 31043 | G01 | 7511  | 401152 | C4orf3   | 0.1864 | 1.5361 |
| 51022 | A03 | 56161 | 28990  | ASTE1    | 0.1868 | 1.5375 |
| 11034 | H02 | 7934  | 5272   | SERPINB9 | 0.1873 | 1.5394 |
| 51024 | B07 | 56283 | 7226   | TRPM2    | 0.1876 | 1.5402 |
| 11021 | B06 | 5797  | 5682   | PSMA1    | 0.1877 | 1.5406 |
| 11062 | B02 | 1984  | 10773  | ZBTB6    | 0.1878 | 1.5410 |
| 11019 | B04 | 7968  | 23509  | POFUT1   | 0.1878 | 1.5411 |
| 31009 | F08 | 11497 | 23705  | CADM1    | 0.1881 | 1.5421 |
| 11047 | D12 | 1617  | 136263 | C7orf45  | 0.1883 | 1.5429 |
| 11056 | D04 | 5776  | 3382   | ICA1     | 0.1884 | 1.5432 |
| 11046 | G05 | 1329  | 9653   | HS2ST1   | 0.1885 | 1.5435 |
| 11065 | F02 | 4999  | 3500   | IGHG1    | 0.1886 | 1.5439 |
| 11055 | E04 | 2118  | 9650   | MTRF1    | 0.1891 | 1.5456 |
| 31024 | A07 | 13577 | 10811  | NOXA1    | 0.1900 | 1.5486 |

|       |     |       |        |          |        |        |
|-------|-----|-------|--------|----------|--------|--------|
| 11029 | A09 | 3336  | 5957   | RCVRN    | 0.1901 | 1.5492 |
| 11034 | A10 | 3668  | 8878   | SQSTM1   | 0.1902 | 1.5496 |
| 31001 | G07 | 10567 | 2730   | GCLM     | 0.1906 | 1.5509 |
| 11054 | H08 | 245   | 64223  | MLST8    | 0.1909 | 1.5519 |
| 11040 | B04 | 5041  | 84772  | MGC13008 | 0.1911 | 1.5527 |
| 31010 | H06 | 11416 | 57506  | MAVS     | 0.1911 | 1.5529 |
| 31002 | A03 | 10401 | 153241 | CEP120   | 0.1912 | 1.5532 |
| 11020 | G07 | 9022  | 6668   | SP2      | 0.1923 | 1.5570 |
| 51034 | C12 | 53700 | 120065 | OR5P2    | 0.1940 | 1.5632 |
| 11042 | F05 | 962   | 1964   | EIF1AX   | 0.1942 | 1.5638 |
| 31003 | B02 | 10381 | 162387 | MFSD6L   | 0.1944 | 1.5645 |
| 11065 | F09 | 7063  | 9093   | DNAJA3   | 0.1947 | 1.5658 |
| 11054 | H09 | 2716  | 79023  | NUP37    | 0.1950 | 1.5668 |
| 31003 | G07 | 10649 | 401145 | FAM190A  | 0.1952 | 1.5675 |
| 11068 | D04 | 9324  | 2328   | FMO3     | 0.1953 | 1.5678 |
| 51016 | F09 | 56194 | 340542 | BEX5     | 0.1954 | 1.5682 |
| 11074 | A09 | 4149  | 79154  | DHRS11   | 0.1954 | 1.5683 |
| 51017 | D12 | 56362 | 3925   | STMN1    | 0.1955 | 1.5685 |
| 51017 | G07 | 56507 | 130813 | C2orf50  | 0.1968 | 1.5733 |
| 11048 | A09 | 2816  | 713    | C1QB     | 0.1973 | 1.5749 |
| 11054 | C11 | 8126  | 54762  | GRAMD1C  | 0.1976 | 1.5761 |
| 11034 | D06 | 9401  | 56965  | PARP6    | 0.1987 | 1.5800 |
| 11045 | G07 | 8490  | 199964 | TMEM61   | 0.1989 | 1.5808 |
| 11067 | A09 | 6437  | 8050   | PDHX     | 0.1991 | 1.5815 |
| 11081 | B07 | 3663  | 29923  | C7orf68  | 0.1999 | 1.5845 |
| 51021 | H09 | 56216 | 51276  | ZNF571   | 0.2000 | 1.5849 |
| 31014 | C08 | 11892 | 116085 | SLC22A12 | 0.2001 | 1.5854 |
| 11034 | G06 | 6237  | 2852   | GPER     | 0.2010 | 1.5885 |
| 11065 | G01 | 7823  | 3268   | AGFG2    | 0.2012 | 1.5894 |
| 51006 | D06 | 55380 | 54704  | PDP1     | 0.2021 | 1.5925 |
| 11020 | F07 | 5517  | 7172   | TPMT     | 0.2022 | 1.5930 |
| 31030 | C05 | 14369 | 127254 | C1orf173 | 0.2036 | 1.5980 |
| 11027 | A07 | 2990  | 51693  | TRAPPC2L | 0.2036 | 1.5980 |
| 51034 | E10 | 54211 | 259290 | TAS2R31  | 0.2037 | 1.5983 |
| 11063 | H10 | 121   | 57120  | GOPC     | 0.2039 | 1.5991 |
| 11065 | F12 | 948   | 83480  | PUS3     | 0.2040 | 1.5997 |
| 31008 | G07 | 11453 | 89894  | TMEM116  | 0.2040 | 1.5997 |
| 31001 | H09 | 10522 | 122060 | SLAIN1   | 0.2046 | 1.6016 |
| 51010 | B03 | 52683 | 56133  | PCDHB2   | 0.2056 | 1.6053 |
| 11027 | F03 | 3654  | 2524   | FUT2     | 0.2056 | 1.6054 |
| 51011 | F07 | 52873 | 3161   | HMMR     | 0.2058 | 1.6061 |
| 11008 | D06 | 3203  | 30968  | STOML2   | 0.2067 | 1.6096 |
| 11037 | A09 | 3445  | 4678   | NASP     | 0.2068 | 1.6100 |
| 51010 | H11 | 52864 | 8747   | ADAM21   | 0.2072 | 1.6112 |



|       |     |       |        |          |        |        |
|-------|-----|-------|--------|----------|--------|--------|
| 11034 | A04 | 4715  | 384    | ARG2     | 0.2074 | 1.6121 |
| 11084 | H03 | 7365  | 6137   | RPL13    | 0.2083 | 1.6154 |
| 11065 | C01 | 2051  | 10269  | ZMPSTE24 | 0.2098 | 1.6212 |
| 31031 | E05 | 14572 | 51561  | IL23A    | 0.2112 | 1.6263 |
| 11062 | A09 | 7178  | 9514   | GAL3ST1  | 0.2122 | 1.6299 |
| 11055 | D05 | 4101  | 1520   | CTSS     | 0.2128 | 1.6324 |
| 31016 | C12 | 12674 | 35     | ACADS    | 0.2132 | 1.6337 |
| 11055 | D08 | 6932  | 5954   | RCN1     | 0.2136 | 1.6353 |
| 31029 | C06 | 14309 | 51119  | SBDS     | 0.2137 | 1.6359 |
| 51018 | A04 | 55787 | 142686 | ASB14    | 0.2139 | 1.6364 |
| 51011 | H11 | 53624 | 7638   | ZNF221   | 0.2143 | 1.6381 |
| 11063 | H11 | 8330  | 653    | BMP5     | 0.2144 | 1.6383 |
| 11041 | D07 | 819   | 90488  | C12orf23 | 0.2148 | 1.6399 |
| 11027 | C04 | 8235  | 83692  | CD99L2   | 0.2154 | 1.6420 |
| 51008 | H06 | 55213 | 5800   | PTPRO    | 0.2156 | 1.6428 |
| 51028 | A09 | 53351 | 80108  | ZFP2     | 0.2156 | 1.6428 |
| 11065 | D04 | 1625  | 59084  | ENPP5    | 0.2167 | 1.6472 |
| 11029 | G04 | 9151  | 79896  | THNSL1   | 0.2176 | 1.6504 |
| 31006 | H09 | 11103 | 843    | CASP10   | 0.2193 | 1.6571 |
| 11067 | A11 | 7879  | 84680  | ACCS     | 0.2196 | 1.6580 |
| 11059 | F08 | 8320  | 6442   | SGCA     | 0.2216 | 1.6657 |
| 11080 | C12 | 9542  | 9918   | NCAPD2   | 0.2225 | 1.6690 |
| 51009 | H07 | 52897 | 3699   | ITIH3    | 0.2226 | 1.6695 |
| 11034 | G10 | 2086  | 140625 | ACTRT2   | 0.2230 | 1.6710 |
| 11040 | G01 | 8385  | 6363   | CCL19    | 0.2234 | 1.6725 |
| 31002 | B08 | 10741 | 29068  | ZBTB44   | 0.2244 | 1.6764 |
| 51022 | H05 | 55879 | 3161   | HMMR     | 0.2248 | 1.6781 |
| 11021 | A07 | 7818  | 158471 | PRUNE2   | 0.2249 | 1.6784 |
| 51014 | B06 | 53063 | 57054  | DAZ3     | 0.2252 | 1.6795 |
| 11039 | D06 | 1365  | 133482 | SLCO6A1  | 0.2259 | 1.6823 |
| 11089 | F04 | 3047  | 55244  | SLC47A1  | 0.2270 | 1.6864 |
| 11038 | C08 | 4709  | 6642   | SNX1     | 0.2275 | 1.6886 |
| 31023 | D01 | 13438 | 83734  | ATG10    | 0.2278 | 1.6895 |
| 11024 | H07 | 9223  | 2242   | FES      | 0.2293 | 1.6953 |
| 11082 | A03 | 2222  | 283197 | C11orf64 | 0.2294 | 1.6959 |
| 11025 | H08 | 1601  | 5921   | RASA1    | 0.2301 | 1.6987 |
| 51018 | H08 | 55774 | 6191   | RPS4X    | 0.2320 | 1.7059 |
| 11003 | A11 | 5283  | 84964  | ALKBH6   | 0.2321 | 1.7066 |
| 31004 | H07 | 11060 | 118812 | MORN4    | 0.2349 | 1.7177 |
| 11065 | D01 | 5817  | 8220   | DGCR14   | 0.2359 | 1.7214 |
| 11035 | G07 | 3662  | 10422  | UBAC1    | 0.2363 | 1.7229 |
| 11065 | C02 | 4749  | 25814  | ATXN10   | 0.2371 | 1.7264 |
| 11071 | G02 | 8267  | 151790 | WDR49    | 0.2372 | 1.7267 |
| 11068 | A01 | 2290  | 10943  | MSL3     | 0.2385 | 1.7317 |

|       |     |       |        |            |        |        |
|-------|-----|-------|--------|------------|--------|--------|
| 11041 | C08 | 1098  | 6372   | CXCL6      | 0.2396 | 1.7362 |
| 51022 | E05 | 56317 | 90167  | FRMD7      | 0.2401 | 1.7384 |
| 11065 | A01 | 2574  | 8908   | GYG2       | 0.2406 | 1.7403 |
| 51008 | H03 | 55109 | 5978   | REST       | 0.2412 | 1.7427 |
| 11057 | C09 | 8037  | 623    | BDKRB1     | 0.2437 | 1.7526 |
| 11027 | E05 | 900   | 81856  | ZNF611     | 0.2437 | 1.7527 |
| 31045 | B06 | 2646  | 84663  | CYorf15B   | 0.2448 | 1.7572 |
| 11026 | E09 | 621   | 653784 | MZT2A      | 0.2480 | 1.7703 |
| 51010 | C02 | 53861 | 8641   | PCDHGB4    | 0.2491 | 1.7745 |
| 11069 | G04 | 8400  | 147687 | ZNF417     | 0.2567 | 1.8060 |
| 11065 | E03 | 1529  | 9194   | SLC16A7    | 0.2585 | 1.8133 |
| 11072 | F05 | 1597  | 50640  | PNPLA8     | 0.2586 | 1.8139 |
| 11065 | D10 | 5154  | 79731  | NARS2      | 0.2591 | 1.8159 |
| 11032 | H07 | 1949  | 10026  | PIGK       | 0.2593 | 1.8166 |
| 11041 | D06 | 7516  | 90736  | FAM104B    | 0.2606 | 1.8222 |
| 51014 | E07 | 53082 | 339967 | TMPRSS11A  | 0.2607 | 1.8225 |
| 11011 | D07 | 6253  | 55322  | C5orf22    | 0.2612 | 1.8247 |
| 51016 | H05 | 56803 | 440145 | MZT1       | 0.2662 | 1.8457 |
| 11014 | E02 | 3053  | 1295   | COL8A1     | 0.2666 | 1.8478 |
| 31004 | G04 | 11095 | 399669 | ZNF321     | 0.2668 | 1.8483 |
| 11037 | F11 | 5597  | 3459   | IFNGR1     | 0.2670 | 1.8492 |
| 31037 | C09 | 14100 | 127795 | C1orf87    | 0.2684 | 1.8553 |
| 11065 | H04 | 2385  | 27248  | ERLEC1     | 0.2707 | 1.8650 |
| 11056 | H06 | 3502  | 822    | CAPG       | 0.2727 | 1.8737 |
| 11030 | C01 | 5553  | 84125  | LRRIQ1     | 0.2755 | 1.8858 |
| 51014 | C07 | 52722 | 89777  | SERPINB12  | 0.2762 | 1.8890 |
| 31018 | E07 | 13230 | 65084  | TMEM135    | 0.2846 | 1.9257 |
| 11064 | A09 | 4105  | 3866   | KRT15      | 0.2868 | 1.9354 |
| 11032 | A09 | 7415  | 6696   | SPP1       | 0.2874 | 1.9382 |
| 11038 | B05 | 3408  | 2271   | FH         | 0.2882 | 1.9419 |
| 11063 | B09 | 7917  | 57684  | ZBTB26     | 0.2893 | 1.9466 |
| 11066 | A07 | 9201  | 64506  | CPEB1      | 0.2924 | 1.9606 |
| 11065 | F06 | 9316  | 6103   | RPGR       | 0.2972 | 1.9823 |
| 31045 | A08 | 4308  | 84740  | AFAP1AS    | 0.2990 | 1.9906 |
| 11065 | G03 | 664   | 1890   | TYMP       | 0.3049 | 2.0178 |
| 11035 | F03 | 1339  | 55900  | ZNF302     | 0.3060 | 2.0231 |
| 11083 | C06 | 776   | 767    | CA8        | 0.3061 | 2.0234 |
| 31045 | F07 | 9775  | 23181  | DIP2A      | 0.3136 | 2.0589 |
| 11067 | A07 | 1250  | 3760   | KCNJ3      | 0.3260 | 2.1184 |
| 31011 | E09 | 12327 | 284942 | RPL23AP82  | 0.3404 | 2.1896 |
| 31005 | B07 | 10883 | 55790  | CSGALNACT1 | 0.3465 | 2.2206 |
| 11032 | G06 | 1933  | 51360  | MBTPS2     | 0.3475 | 2.2259 |
| 11053 | E08 | 2162  | 160140 | C11orf65   | 0.3615 | 2.2989 |
| 51016 | G04 | 56168 | NA     | NA         | 0.3663 | 2.3241 |



**Table S2. Retest of candidate ORFs in 96-well format.** Clones whose fold changes of Fluc/Rluc were > 1.2 or < 0.8 after LEN treatment are labeled with red and yellow, respectively. Clones with p-values < 0.05 are labeled with green. Clone 11024@H07 was excluded due to extremely high Fluc/Rluc values. The criteria for defining positive hits: fold changes of Fluc/Rluc >1.2 or <0.8 with a p-value < 0.05.

| Plate | Position | Internal_ID | GENE_ID | Symbol     | Fold Change (384 well Primary Screen) | Fluc/Rluc Average (DMSO) (96 well) | Fluc/Rluc Average (LEN) (96 well) | Fluc/Rluc SD (DMSO) (96 well) | Fluc/Rluc SD (LEN) (96 well) | Fold Chang (96 well) | Student's T test P Value |
|-------|----------|-------------|---------|------------|---------------------------------------|------------------------------------|-----------------------------------|-------------------------------|------------------------------|----------------------|--------------------------|
| 11080 | B08      | 2561        | 8204    | NRIP1      | 0.454                                 | 0.372                              | 0.361                             | 0.049                         | 0.069                        | 0.968                | 0.788                    |
| 31004 | G10      | 11261       | 339512  | C1orf110   | 0.465                                 | 0.169                              | 0.168                             | 0.005                         | 0.005                        | 0.994                | 0.764                    |
| 11082 | B07      | 9258        | 389458  | LOC389458  | 0.477                                 | 0.998                              | 1.046                             | 0.108                         | 0.132                        | 1.048                | 0.594                    |
| 11029 | G09      | 10014       | 221416  | C6orf223   | 0.485                                 | 0.579                              | 0.562                             | 0.015                         | 0.012                        | 0.972                | 0.140                    |
| 11082 | H06      | 2406        | NA      | NA         | 0.489                                 | 0.505                              | 0.545                             | 0.116                         | 0.066                        | 1.079                | 0.573                    |
| 11038 | B09      | 6052        | 1736    | DKC1       | 0.499                                 | 0.589                              | 0.585                             | 0.020                         | 0.011                        | 0.993                | 0.721                    |
| 51034 | H06      | 54345       | 55554   | KLK15      | 0.503                                 | 0.474                              | 0.523                             | 0.029                         | 0.051                        | 1.104                | 0.144                    |
| 31022 | H03      | 13406       | 91272   | BOD1       | 0.513                                 | 0.846                              | 0.839                             | 0.082                         | 0.029                        | 0.992                | 0.874                    |
| 11084 | G04      | 8079        | 122970  | ACOT4      | 0.514                                 | 0.318                              | 0.307                             | 0.021                         | 0.025                        | 0.965                | 0.517                    |
| 11020 | E05      | 8002        | 79031   | PDCL3      | 0.516                                 | 0.869                              | 0.845                             | 0.028                         | 0.009                        | 0.972                | 0.150                    |
| 11064 | G07      | 2289        | 144577  | C12orf66   | 0.516                                 | 0.221                              | 0.233                             | 0.025                         | 0.024                        | 1.055                | 0.502                    |
| 11038 | H02      | 2463        | 9139    | CBFA2T2    | 0.522                                 | 0.258                              | 0.263                             | 0.006                         | 0.010                        | 1.018                | 0.458                    |
| 11024 | F03      | 4637        | 629     | CFB        | 0.533                                 | 0.231                              | 0.237                             | 0.009                         | 0.012                        | 1.027                | 0.436                    |
| 11024 | E08      | 8220        | 27042   | C1orf107   | 0.535                                 | 0.179                              | 0.180                             | 0.018                         | 0.010                        | 1.004                | 0.944                    |
| 31024 | C04      | 13407       | 7266    | DNAJC7     | 0.539                                 | 0.367                              | 0.379                             | 0.010                         | 0.029                        | 1.032                | 0.477                    |
| 31009 | C10      | 11731       | 55178   | RNMTL1     | 0.541                                 | 0.845                              | 0.893                             | 0.034                         | 0.053                        | 1.056                | 0.183                    |
| 31030 | F12      | 14246       | 4641    | MYO1C      | 0.544                                 | 0.824                              | 0.844                             | 0.037                         | 0.023                        | 1.025                | 0.376                    |
| 31011 | A09      | 11911       | 286016  | TPIIP2     | 0.548                                 | 0.252                              | 0.257                             | 0.010                         | 0.007                        | 1.020                | 0.442                    |
| 11038 | G02      | 5400        | 54973   | CPSF3L     | 0.549                                 | 0.406                              | 0.418                             | 0.017                         | 0.015                        | 1.029                | 0.333                    |
| 11058 | A12      | 3916        | 6944    | VPS72      | 0.568                                 | 0.404                              | 0.399                             | 0.005                         | 0.024                        | 0.989                | 0.725                    |
| 51013 | A07      | 13943       | 9247    | GCM2       | 0.569                                 | 0.247                              | 0.250                             | 0.016                         | 0.013                        | 1.011                | 0.790                    |
| 11072 | G10      | 2659        | 9779    | TBC1D5     | 0.570                                 | 0.977                              | 0.971                             | 0.013                         | 0.090                        | 0.995                | 0.916                    |
| 11024 | B05      | 4311        | 960     | CD44       | 0.571                                 | 1.233                              | 1.209                             | 0.044                         | 0.088                        | 0.980                | 0.633                    |
| 11082 | C07      | 5600        | 1208    | CLPS       | 0.574                                 | 0.840                              | 0.844                             | 0.037                         | 0.027                        | 1.004                | 0.882                    |
| 11065 | A06      | 1209        | 55808   | ST6GALNAC1 | 0.578                                 | 0.300                              | 0.296                             | 0.017                         | 0.013                        | 0.989                | 0.768                    |
| 11048 | A06      | 6442        | 374     | AREG       | 0.579                                 | 0.678                              | 0.692                             | 0.100                         | 0.051                        | 1.021                | 0.810                    |
| 11084 | C07      | 6790        | 80233   | C17orf70   | 0.586                                 | 0.278                              | 0.277                             | 0.018                         | 0.030                        | 0.996                | 0.948                    |
| 11042 | G02      | 8249        | 219833  | C11orf45   | 0.587                                 | 0.650                              | 0.645                             | 0.038                         | 0.028                        | 0.992                | 0.834                    |
| 11024 | E07      | 3321        | 1374    | CPT1A      | 0.589                                 | 0.384                              | 0.389                             | 0.026                         | 0.033                        | 1.011                | 0.844                    |
| 11042 | E08      | 7003        | 360132  | FKBP9L     | 0.591                                 | 0.246                              | 0.250                             | 0.016                         | 0.009                        | 1.017                | 0.662                    |
| 11040 | H06      | 6318        | 8367    | HIST1H4E   | 0.591                                 | 0.815                              | 0.807                             | 0.041                         | 0.017                        | 0.990                | 0.735                    |
| 11038 | C06      | 5336        | 25793   | FBXO7      | 0.601                                 | 0.359                              | 0.377                             | 0.016                         | 0.011                        | 1.051                | 0.100                    |
| 31002 | F06      | 10315       | 6557    | SLC12A1    | 0.601                                 | 0.889                              | 0.909                             | 0.051                         | 0.050                        | 1.022                | 0.600                    |
| 11067 | D12      | 10016       | 22806   | IKZF3      | 0.602                                 | 0.218                              | 0.148                             | 0.003                         | 0.005                        | 0.680                | 0.000                    |

|       |     |       |        |           |       |         |         |        |        |       |       |
|-------|-----|-------|--------|-----------|-------|---------|---------|--------|--------|-------|-------|
| 11038 | E08 | 5255  | 5327   | PLAT      | 0.602 | 0.125   | 0.127   | 0.013  | 0.007  | 1.013 | 0.830 |
| 11029 | F05 | 10136 | 1588   | CYP19A1   | 0.606 | 0.468   | 0.498   | 0.024  | 0.018  | 1.065 | 0.090 |
| 11038 | B01 | 3212  | 224    | ALDH3A2   | 0.606 | 0.083   | 0.088   | 0.003  | 0.002  | 1.056 | 0.035 |
| 31005 | G08 | 10894 | 160140 | C11orf65  | 0.608 | 0.300   | 0.280   | 0.043  | 0.008  | 0.934 | 0.401 |
| 11012 | E12 | 5390  | 57003  | CCDC47    | 0.608 | 0.066   | 0.064   | 0.003  | 0.002  | 0.982 | 0.484 |
| 11083 | B04 | 2738  | 9804   | TOMM20    | 0.611 | 0.280   | 0.203   | 0.144  | 0.008  | 0.723 | 0.322 |
| 31004 | A10 | 11031 | 6133   | RPL9      | 0.613 | 0.559   | 0.523   | 0.066  | 0.044  | 0.936 | 0.401 |
| 11037 | H03 | 4971  | 9397   | NMT2      | 0.614 | 1.032   | 1.045   | 0.097  | 0.027  | 1.012 | 0.812 |
| 11083 | A08 | 9795  | 25788  | RAD54B    | 0.614 | 0.368   | 0.397   | 0.025  | 0.056  | 1.078 | 0.385 |
| 11080 | A06 | 6222  | 10743  | RAI1      | 0.615 | 0.058   | 0.063   | 0.008  | 0.007  | 1.095 | 0.343 |
| 11041 | H08 | 4150  | 51330  | TNFRSF12A | 0.616 | 0.393   | 0.385   | 0.009  | 0.018  | 0.979 | 0.451 |
| 31007 | H04 | 11248 | 10640  | EXOC5     | 0.616 | 0.997   | 1.005   | 0.085  | 0.033  | 1.008 | 0.861 |
| 51014 | B06 | 53063 | 57054  | DAZ3      | 1.680 | 0.775   | 0.771   | 0.024  | 0.085  | 0.994 | 0.922 |
| 11039 | D06 | 1365  | 133482 | SLCO6A1   | 1.682 | 2.075   | 2.313   | 0.085  | 0.421  | 1.114 | 0.312 |
| 11089 | F04 | 3047  | 55244  | SLC47A1   | 1.686 | 0.378   | 0.382   | 0.037  | 0.029  | 1.010 | 0.880 |
| 11038 | C08 | 4709  | 6642   | SNX1      | 1.689 | 2.444   | 2.482   | 0.031  | 0.297  | 1.015 | 0.809 |
| 31023 | D01 | 13438 | 83734  | ATG10     | 1.690 | 0.313   | 0.330   | 0.011  | 0.014  | 1.054 | 0.106 |
| 11024 | H07 | 9223  | 2242   | FES       | 1.695 | 373.184 | 449.724 | 44.940 | 41.568 | 1.205 | 0.046 |
| 11082 | A03 | 2222  | 283197 | C11orf64  | 1.696 | 0.445   | 0.459   | 0.102  | 0.051  | 1.032 | 0.812 |
| 11025 | H08 | 1601  | 5921   | RASA1     | 1.699 | 21.856  | 22.244  | 0.813  | 1.548  | 1.018 | 0.673 |
| 51018 | H08 | 55774 | 6191   | RPS4X     | 1.706 | 0.470   | 0.488   | 0.012  | 0.016  | 1.038 | 0.127 |
| 11003 | A11 | 5283  | 84964  | ALKBH6    | 1.707 | 0.344   | 0.370   | 0.012  | 0.020  | 1.076 | 0.067 |
| 31004 | H07 | 11060 | 118812 | MORN4     | 1.718 | 1.522   | 1.461   | 0.205  | 0.287  | 0.960 | 0.742 |
| 11065 | D01 | 5817  | 8220   | DGCR14    | 1.721 | 0.753   | 0.765   | 0.009  | 0.040  | 1.015 | 0.597 |
| 11035 | G07 | 3662  | 10422  | UBAC1     | 1.723 | 3.280   | 3.119   | 0.210  | 0.070  | 0.951 | 0.195 |
| 11065 | C02 | 4749  | 25814  | ATXN10    | 1.726 | 0.785   | 0.859   | 0.040  | 0.036  | 1.094 | 0.032 |
| 11071 | G02 | 8267  | 151790 | WDR49     | 1.727 | 0.557   | 0.561   | 0.040  | 0.047  | 1.006 | 0.917 |
| 11068 | A01 | 2290  | 10943  | MSL3      | 1.732 | 0.866   | 0.857   | 0.136  | 0.098  | 0.989 | 0.913 |
| 11041 | C08 | 1098  | 6372   | CXCL6     | 1.736 | 16.980  | 17.302  | 1.316  | 1.741  | 1.019 | 0.778 |
| 51022 | E05 | 56317 | 90167  | FRMD7     | 1.738 | 9.785   | 10.242  | 1.118  | 1.398  | 1.047 | 0.627 |
| 11065 | A01 | 2574  | 8908   | GYG2      | 1.740 | 0.481   | 0.490   | 0.034  | 0.029  | 1.019 | 0.701 |
| 51008 | H03 | 55109 | 5978   | REST      | 1.743 | 0.578   | 0.599   | 0.015  | 0.024  | 1.036 | 0.194 |
| 11057 | C09 | 8037  | 623    | BDKRB1    | 1.753 | 2.940   | 2.967   | 0.414  | 0.542  | 1.009 | 0.940 |
| 11027 | E05 | 900   | 81856  | ZNF611    | 1.753 | 1.939   | 1.956   | 0.047  | 0.119  | 1.009 | 0.797 |
| 31045 | B06 | 2646  | 84663  | CYorf15B  | 1.757 | 4.298   | 4.090   | 0.269  | 0.309  | 0.952 | 0.349 |
| 11026 | E09 | 621   | 653784 | MZT2A     | 1.770 | 1.592   | 1.620   | 0.044  | 0.100  | 1.017 | 0.630 |
| 51010 | C02 | 53861 | 8641   | PCDHGB4   | 1.775 | 0.695   | 0.676   | 0.062  | 0.044  | 0.973 | 0.638 |
| 11069 | G04 | 8400  | 147687 | ZNF417    | 1.806 | 0.212   | 0.210   | 0.011  | 0.012  | 0.992 | 0.839 |
| 11065 | E03 | 1529  | 9194   | SLC16A7   | 1.813 | 2.835   | 3.291   | 0.317  | 0.313  | 1.161 | 0.086 |
| 11072 | F05 | 1597  | 50640  | PNPLA8    | 1.814 | 0.493   | 0.549   | 0.055  | 0.099  | 1.113 | 0.364 |
| 11065 | D10 | 5154  | 79731  | NARS2     | 1.816 | 0.202   | 0.204   | 0.017  | 0.013  | 1.011 | 0.848 |

|       |     |       |        |            |       |        |        |       |       |       |       |
|-------|-----|-------|--------|------------|-------|--------|--------|-------|-------|-------|-------|
| 11032 | H07 | 1949  | 10026  | PIGK       | 1.817 | 10.113 | 10.309 | 0.570 | 0.212 | 1.019 | 0.544 |
| 11041 | D06 | 7516  | 90736  | FAM104B    | 1.822 | 4.086  | 4.029  | 0.087 | 0.239 | 0.986 | 0.670 |
| 51014 | E07 | 53082 | 339967 | TMPRSS11A  | 1.823 | 0.475  | 0.484  | 0.031 | 0.017 | 1.018 | 0.645 |
| 11011 | D07 | 6253  | 55322  | C5orf22    | 1.825 | 2.617  | 2.713  | 0.270 | 0.156 | 1.037 | 0.563 |
| 51016 | H05 | 56803 | 440145 | MZT1       | 1.846 | 0.422  | 0.366  | 0.060 | 0.035 | 0.868 | 0.161 |
| 11014 | E02 | 3053  | 1295   | COL8A1     | 1.848 | 0.456  | 0.490  | 0.031 | 0.012 | 1.075 | 0.085 |
| 31004 | G04 | 11095 | 399669 | ZNF321     | 1.848 | 5.557  | 5.419  | 0.295 | 0.192 | 0.975 | 0.463 |
| 11037 | F11 | 5597  | 3459   | IFNGR1     | 1.849 | 1.134  | 1.045  | 0.077 | 0.068 | 0.921 | 0.132 |
| 31037 | C09 | 14100 | 127795 | C1orf87    | 1.855 | 0.767  | 0.819  | 0.034 | 0.037 | 1.067 | 0.086 |
| 11065 | H04 | 2385  | 27248  | ERLEC1     | 1.865 | 0.767  | 0.712  | 0.041 | 0.057 | 0.928 | 0.162 |
| 11056 | H06 | 3502  | 822    | CAPG       | 1.874 | 0.064  | 0.062  | 0.001 | 0.001 | 0.969 | 0.054 |
| 11030 | C01 | 5553  | 84125  | LRRIQ1     | 1.886 | 0.710  | 0.760  | 0.043 | 0.051 | 1.071 | 0.184 |
| 51014 | C07 | 52722 | 89777  | SERPINB12  | 1.889 | 2.124  | 2.107  | 0.078 | 0.071 | 0.992 | 0.752 |
| 31018 | E07 | 13230 | 65084  | TMEM135    | 1.926 | 1.386  | 1.401  | 0.108 | 0.133 | 1.011 | 0.866 |
| 11064 | A09 | 4105  | 3866   | KRT15      | 1.935 | 1.467  | 1.388  | 0.088 | 0.079 | 0.946 | 0.233 |
| 11032 | A09 | 7415  | 6696   | SPP1       | 1.938 | 5.890  | 5.989  | 0.321 | 0.180 | 1.017 | 0.610 |
| 11038 | B05 | 3408  | 2271   | FH         | 1.942 | 0.690  | 0.691  | 0.015 | 0.015 | 1.001 | 0.952 |
| 11063 | B09 | 7917  | 57684  | ZBTB26     | 1.947 | 2.168  | 2.273  | 0.217 | 0.104 | 1.049 | 0.415 |
| 11066 | A07 | 9201  | 64506  | CPEB1      | 1.961 | 0.667  | 0.687  | 0.050 | 0.024 | 1.030 | 0.501 |
| 11065 | F06 | 9316  | 6103   | RPGR       | 1.982 | 1.752  | 1.743  | 0.073 | 0.190 | 0.995 | 0.931 |
| 31045 | A08 | 4308  | 84740  | AFAP1AS    | 1.991 | 0.445  | 0.419  | 0.015 | 0.013 | 0.942 | 0.056 |
| 11065 | G03 | 664   | 1890   | TYMP       | 2.018 | 2.278  | 2.305  | 0.062 | 0.044 | 1.012 | 0.505 |
| 11035 | F03 | 1339  | 55900  | ZNF302     | 2.023 | 0.783  | 0.833  | 0.023 | 0.048 | 1.063 | 0.116 |
| 11083 | C06 | 776   | 767    | CA8        | 2.023 | 1.093  | 0.953  | 0.380 | 0.148 | 0.872 | 0.519 |
| 31045 | F07 | 9775  | 23181  | DIP2A      | 2.059 | 0.039  | 0.039  | 0.004 | 0.002 | 0.995 | 0.927 |
| 11067 | A07 | 1250  | 3760   | KCNJ3      | 2.118 | 0.187  | 0.202  | 0.002 | 0.008 | 1.079 | 0.009 |
| 31011 | E09 | 12327 | 284942 | RPL23AP82  | 2.190 | 2.522  | 2.878  | 0.310 | 0.206 | 1.141 | 0.104 |
| 31005 | B07 | 10883 | 55790  | CSGALNACT1 | 2.221 | 1.023  | 1.087  | 0.059 | 0.018 | 1.062 | 0.084 |
| 11032 | G06 | 1933  | 51360  | MBTPS2     | 2.226 | 7.286  | 7.526  | 0.432 | 0.289 | 1.033 | 0.391 |
| 11053 | E08 | 2162  | 160140 | C11orf65   | 2.299 | 0.343  | 0.412  | 0.044 | 0.033 | 1.203 | 0.044 |
| 51016 | G04 | 56168 | NA     | NA         | 2.324 | 22.589 | 23.599 | 0.912 | 0.424 | 1.045 | 0.091 |
| 11013 | E07 | 8337  | 9692   | KIAA0391   | 2.713 | 12.678 | 13.558 | 0.332 | 0.463 | 1.069 | 0.021 |
| 11065 | D09 | 2940  | 10320  | IKZF1      | 0.641 | 0.315  | 0.145  | 0.013 | 0.008 | 0.459 | 0.000 |

Green P < 0.05

Red Fold > 1.2

Yellow Fold < 0.8

## References and Notes

1. R. Martiniani, V. Di Loreto, C. Di Sano, A. Lombardo, A. M. Liberati, Biological activity of lenalidomide and its underlying therapeutic effects in multiple myeloma. *Adv. Hematol.* **2012**, 842945 (2012). [Medline doi:10.1155/2012/842945](#)
2. E. Terpos, N. Kanellias, D. Christoulas, E. Kastritis, M. A. Dimopoulos, Pomalidomide: A novel drug to treat relapsed and refractory multiple myeloma. *Onco Targets Ther* **6**, 531–538 (2013). [Medline doi:10.2147/OTT.S34498](#)
3. Y. X. Zhu, K. M. Kortuem, A. K. Stewart, Molecular mechanism of action of immunomodulatory drugs thalidomide, lenalidomide and pomalidomide in multiple myeloma. *Leuk. Lymphoma* **54**, 683–687 (2013). [Medline doi:10.3109/10428194.2012.728597](#)
4. T. Ito, H. Ando, T. Suzuki, T. Ogura, K. Hotta, Y. Imamura, Y. Yamaguchi, H. Handa, Identification of a primary target of thalidomide teratogenicity. *Science* **327**, 1345–1350 (2010). [Medline doi:10.1126/science.1177319](#)
5. A. Lopez-Girona, D. Mendy, T. Ito, K. Miller, A. K. Gandhi, J. Kang, S. Karasawa, G. Carmel, P. Jackson, M. Abbasian, A. Mahmoudi, B. Cathers, E. Rychak, S. Gaidarova, R. Chen, P. H. Schafer, H. Handa, T. O. Daniel, J. F. Evans, R. Chopra, Cereblon is a direct protein target for immunomodulatory and antiproliferative activities of lenalidomide and pomalidomide. *Leukemia* **26**, 2326–2335 (2012). [Medline doi:10.1038/leu.2012.119](#)
6. L. H. Zhang, J. Kosek, M. Wang, C. Heise, P. H. Schafer, R. Chopra, Lenalidomide efficacy in activated B-cell-like subtype diffuse large B-cell lymphoma is dependent upon IRF4 and cereblon expression. *Br. J. Haematol.* **160**, 487–502 (2013). [Medline doi:10.1111/bjh.12172](#)
7. Y. Yang, A. L. Shaffer 3rd, N. C. Emre, M. Ceribelli, M. Zhang, G. Wright, W. Xiao, J. Powell, J. Platig, H. Kohlhammer, R. M. Young, H. Zhao, Y. Yang, W. Xu, J. J. Buggy, S. Balasubramanian, L. A. Mathews, P. Shinn, R. Guha, M. Ferrer, C. Thomas, T. A. Waldmann, L. M. Staudt, Exploiting synthetic lethality for the therapy of ABC diffuse large B cell lymphoma. *Cancer Cell* **21**, 723–737 (2012). [Medline doi:10.1016/j.ccr.2012.05.024](#)
8. Y. X. Zhu, E. Braggio, C. X. Shi, L. A. Bruins, J. E. Schmidt, S. Van Wier, X. B. Chang, C. C. Bjorklund, R. Fonseca, P. L. Bergsagel, R. Z. Orlowski, A. K. Stewart, Cereblon expression is required for the antimyeloma activity of lenalidomide and pomalidomide. *Blood* **118**, 4771–4779 (2011). [Medline doi:10.1182/blood-2011-05-356063](#)
9. A. Broyl, R. Kuiper, M. van Duin, B. van der Holt, L. el Jarari, U. Bertsch, S. Zweegman, A. Buijs, D. Hose, H. M. Lokhorst, H. Goldschmidt, P. Sonneveld Dutch-Belgian HOVON group German GMMG Group, High cereblon expression is associated with better survival in patients with newly diagnosed multiple myeloma treated with thalidomide maintenance. *Blood* **121**, 624–627 (2013). [Medline doi:10.1182/blood-2012-06-438101](#)
10. D. Heintel, A. Rocci, H. Ludwig, A. Bolomsky, S. Caltagirone, M. Schreder, S. Pfeifer, H. Gisslinger, N. Zojer, U. Jäger, A. Palumbo, High expression of cereblon (CRBN) is associated with improved clinical response in patients with multiple myeloma treated with lenalidomide and dexamethasone. *Br. J. Haematol.* **161**, 695–700 (2013). [Medline doi:10.1111/bjh.12338](#)

11. G. J. Zhang, M. Safran, W. Wei, E. Sorensen, P. Lassota, N. Zhelev, D. S. Neuberg, G. Shapiro, W. G. Kaelin Jr., Bioluminescent imaging of Cdk2 inhibition in vivo. *Nat. Med.* **10**, 643–648 (2004). [Medline doi:10.1038/nm1047](#)
12. M. Safran, W. Y. Kim, F. O’Connell, L. Flippin, V. Günzler, J. W. Horner, R. A. Depinho, W. G. Kaelin Jr., Mouse model for noninvasive imaging of HIF prolyl hydroxylase activity: Assessment of an oral agent that stimulates erythropoietin production. *Proc. Natl. Acad. Sci. U.S.A.* **103**, 105–110 (2006). [Medline doi:10.1073/pnas.0509459103](#)
13. H. C. Yen, Q. Xu, D. M. Chou, Z. Zhao, S. J. Elledge, Global protein stability profiling in mammalian cells. *Science* **322**, 918–923 (2008). [Medline doi:10.1126/science.1160489](#)
14. T. A. Soucy, P. G. Smith, M. A. Milhollen, A. J. Berger, J. M. Gavin, S. Adhikari, J. E. Brownell, K. E. Burke, D. P. Cardin, S. Critchley, C. A. Cullis, A. Doucette, J. J. Garnsey, J. L. Gaulin, R. E. Gershman, A. R. Lublinsky, A. McDonald, H. Mizutani, U. Narayanan, E. J. Olhava, S. Peluso, M. Rezaei, M. D. Sintchak, T. Talreja, M. P. Thomas, T. Traore, S. Vyskocil, G. S. Weatherhead, J. Yu, J. Zhang, L. R. Dick, C. F. Claiborne, M. Rolfe, J. B. Bolen, S. P. Langston, An inhibitor of NEDD8-activating enzyme as a new approach to treat cancer. *Nature* **458**, 732–736 (2009). [Medline doi:10.1038/nature07884](#)
15. M. Ohh, W. Y. Kim, J. J. Moslehi, Y. Chen, V. Chau, M. A. Read, W. G. Kaelin Jr., An intact NEDD8 pathway is required for Cullin-dependent ubiquitylation in mammalian cells. *EMBO Rep.* **3**, 177–182 (2002). [Medline doi:10.1093/embo-reports/kvf028](#)
16. L. Cong, F. A. Ran, D. Cox, S. Lin, R. Barretto, N. Habib, P. D. Hsu, X. Wu, W. Jiang, L. A. Marraffini, F. Zhang, Multiplex genome engineering using CRISPR/Cas systems. *Science* **339**, 819–823 (2013). [Medline doi:10.1126/science.1231143](#)
17. P. Mali, L. Yang, K. M. Esvelt, J. Aach, M. Guell, J. E. DiCarlo, J. E. Norville, G. M. Church, RNA-guided human genome engineering via Cas9. *Science* **339**, 823–826 (2013). [Medline doi:10.1126/science.1232033](#)
18. M. Merkenschlager, Ikaros in immune receptor signaling, lymphocyte differentiation, and function. *FEBS Lett.* **584**, 4910–4914 (2010). [Medline doi:10.1016/j.febslet.2010.09.042](#)
19. E. C. Thompson, B. S. Cobb, P. Sabbattini, S. Meixlsperger, V. Parelho, D. Liberg, B. Taylor, N. Dillon, K. Georgopoulos, H. Jumaa, S. T. Smale, A. G. Fisher, M. Merkenschlager, Ikaros DNA-binding proteins as integral components of B cell developmental-stage-specific regulatory circuits. *Immunity* **26**, 335–344 (2007). [Medline doi:10.1016/j.immuni.2007.02.010](#)
20. I. Ferreirós-Vidal, T. Carroll, B. Taylor, A. Terry, Z. Liang, L. Bruno, G. Dharmalingam, S. Khadayate, B. S. Cobb, S. T. Smale, M. Spivakov, P. Srivastava, E. Petretto, A. G. Fisher, M. Merkenschlager, Genome-wide identification of Ikaros targets elucidates its contribution to mouse B-cell lineage specification and pre-B-cell differentiation. *Blood* **121**, 1769–1782 (2013). [Medline doi:10.1182/blood-2012-08-450114](#)
21. S. Monticelli, F. Sallusto, Negative regulators take center stage. *Nat. Immunol.* **13**, 719–720 (2012). [Medline doi:10.1038/ni.2377](#)
22. L. A. Garraway, W. R. Sellers, Lineage dependency and lineage-survival oncogenes in human cancer. *Nat. Rev. Cancer* **6**, 593–602 (2006). [Medline doi:10.1038/nrc1947](#)



23. S. P. Shah, M. Köbel, J. Senz, R. D. Morin, B. A. Clarke, K. C. Wiegand, G. Leung, A. Zayed, E. Mehl, S. E. Kalloger, M. Sun, R. Giuliany, E. Yorida, S. Jones, R. Varhol, K. D. Swenerton, D. Miller, P. B. Clement, C. Crane, J. Madore, D. Provencher, P. Leung, A. DeFazio, J. Khattra, G. Turashvili, Y. Zhao, T. Zeng, J. N. Glover, B. Vanderhyden, C. Zhao, C. A. Parkinson, M. Jimenez-Linan, D. D. Bowtell, A. M. Mes-Masson, J. D. Brenton, S. A. Aparicio, N. Boyd, M. Hirst, C. B. Gilks, M. Marra, D. G. Huntsman, Mutation of FOXL2 in granulosa-cell tumors of the ovary. *N. Engl. J. Med.* **360**, 2719–2729 (2009). [Medline doi:10.1056/NEJMoa0902542](#)
24. P. Kastner, A. Dupuis, M. P. Gaub, R. Herbrecht, P. Lutz, S. Chan, Function of Ikaros as a tumor suppressor in B cell acute lymphoblastic leukemia. *Am J Blood Res* **3**, 1–13 (2013). [Medline](#)
25. F. J. Quintana, H. Jin, E. J. Burns, M. Nadeau, A. Yeste, D. Kumar, M. Rangachari, C. Zhu, S. Xiao, J. Seavitt, K. Georgopoulos, V. K. Kuchroo, Aiolos promotes TH17 differentiation by directly silencing Il2 expression. *Nat. Immunol.* **13**, 770–777 (2012). [Medline doi:10.1038/ni.2363](#)
26. N. Avitahl, S. Winandy, C. Friedrich, B. Jones, Y. Ge, K. Georgopoulos, Ikaros sets thresholds for T cell activation and regulates chromosome propagation. *Immunity* **10**, 333–343 (1999). [Medline doi:10.1016/S1074-7613\(00\)80033-3](#)
27. J. Laubach, P. Richardson, K. Anderson, Multiple myeloma. *Annu. Rev. Med.* **62**, 249–264 (2011). [Medline doi:10.1146/annurev-med-070209-175325](#)
28. P. G. Richardson, E. Weller, S. Jagannath, D. E. Avigan, M. Alsina, R. L. Schlossman, A. Mazumder, N. C. Munshi, I. M. Ghobrial, D. Doss, D. L. Warren, L. E. Lunde, M. McKenney, C. Delaney, C. S. Mitsiades, T. Hideshima, W. Dalton, R. Knight, D. L. Esseltine, K. C. Anderson, Multicenter, phase I, dose-escalation trial of lenalidomide plus bortezomib for relapsed and relapsed/refractory multiple myeloma. *J. Clin. Oncol.* **27**, 5713–5719 (2009). [Medline doi:10.1200/JCO.2009.22.2679](#)
29. G. R. Crabtree, S. L. Schreiber, Three-part inventions: Intracellular signaling and induced proximity. *Trends Biochem. Sci.* **21**, 418–422 (1996). [Medline doi:10.1016/S0968-0004\(96\)20027-1](#)
30. M. R. Campanero, E. K. Flemington, Regulation of E2F through ubiquitin-proteasome-dependent degradation: Stabilization by the pRB tumor suppressor protein. *Proc. Natl. Acad. Sci. U.S.A.* **94**, 2221–2226 (1997). [Medline doi:10.1073/pnas.94.6.2221](#)
31. D. Wiederschain, S. Wee, L. Chen, A. Loo, G. Yang, A. Huang, Y. Chen, G. Caponigro, Y. M. Yao, C. Lengauer, W. R. Sellers, J. D. Benson, Single-vector inducible lentiviral RNAi system for oncology target validation. *Cell Cycle* **8**, 498–504 (2009). [Medline doi:10.4161/cc.8.3.7701](#)
32. C. J. Ott, N. Kopp, L. Bird, R. M. Paranal, J. Qi, T. Bowman, S. J. Rodig, A. L. Kung, J. E. Bradner, D. M. Weinstock, BET bromodomain inhibition targets both c-Myc and IL7R in high-risk acute lymphoblastic leukemia. *Blood* **120**, 2843–2852 (2012). [Medline doi:10.1182/blood-2012-02-413021](#)

33. K. Kondo, J. Klco, E. Nakamura, M. Lechpammer, W. G. Kaelin Jr., Inhibition of HIF is necessary for tumor suppression by the von Hippel-Lindau protein. *Cancer Cell* **1**, 237–246 (2002). [Medline doi:10.1016/S1535-6108\(02\)00043-0](#)
34. J. Lovén, H. A. Hoke, C. Y. Lin, A. Lau, D. A. Orlando, C. R. Vakoc, J. E. Bradner, T. I. Lee, R. A. Young, Selective inhibition of tumor oncogenes by disruption of super-enhancers. *Cell* **153**, 320–334 (2013). [Medline doi:10.1016/j.cell.2013.03.036](#)
